# Supplementary material for: Functional and Regulatory Profiling of Energy Metabolism in Fission Yeast
Source: Preprints.org preprint supplement (doi:10.20944/preprints201610.0054.v1), 2016-10-14

S1 Figure

Algorithm: Self-Organizing Map  
Parameters:  
Cluster on Rows  
Distance metric = Euclidean  
Max num of iterations = 50  
Num of grid rows = 3  
Number of grid col = 4  
Initial learning rate = 0.03  
Initial neighbourhood radius = 5  
Grid topology = Hexagonal  
Neighbourhood type = Bubble  
Software used - GeneSpring 13.0

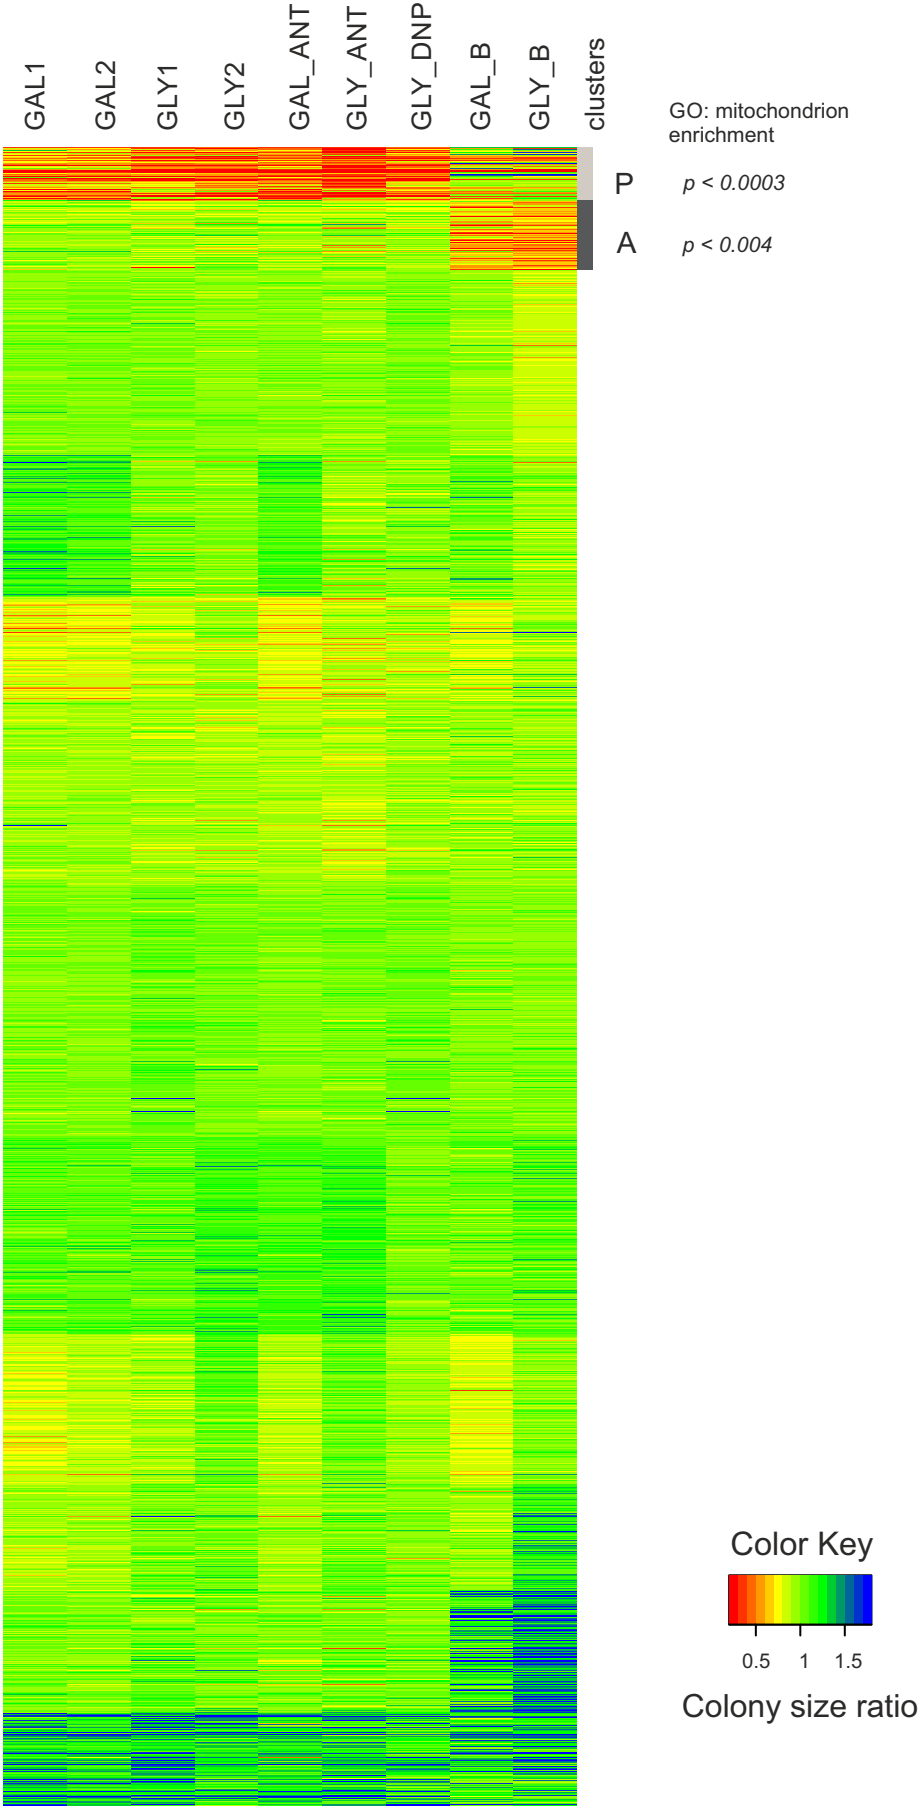

S2 Figure

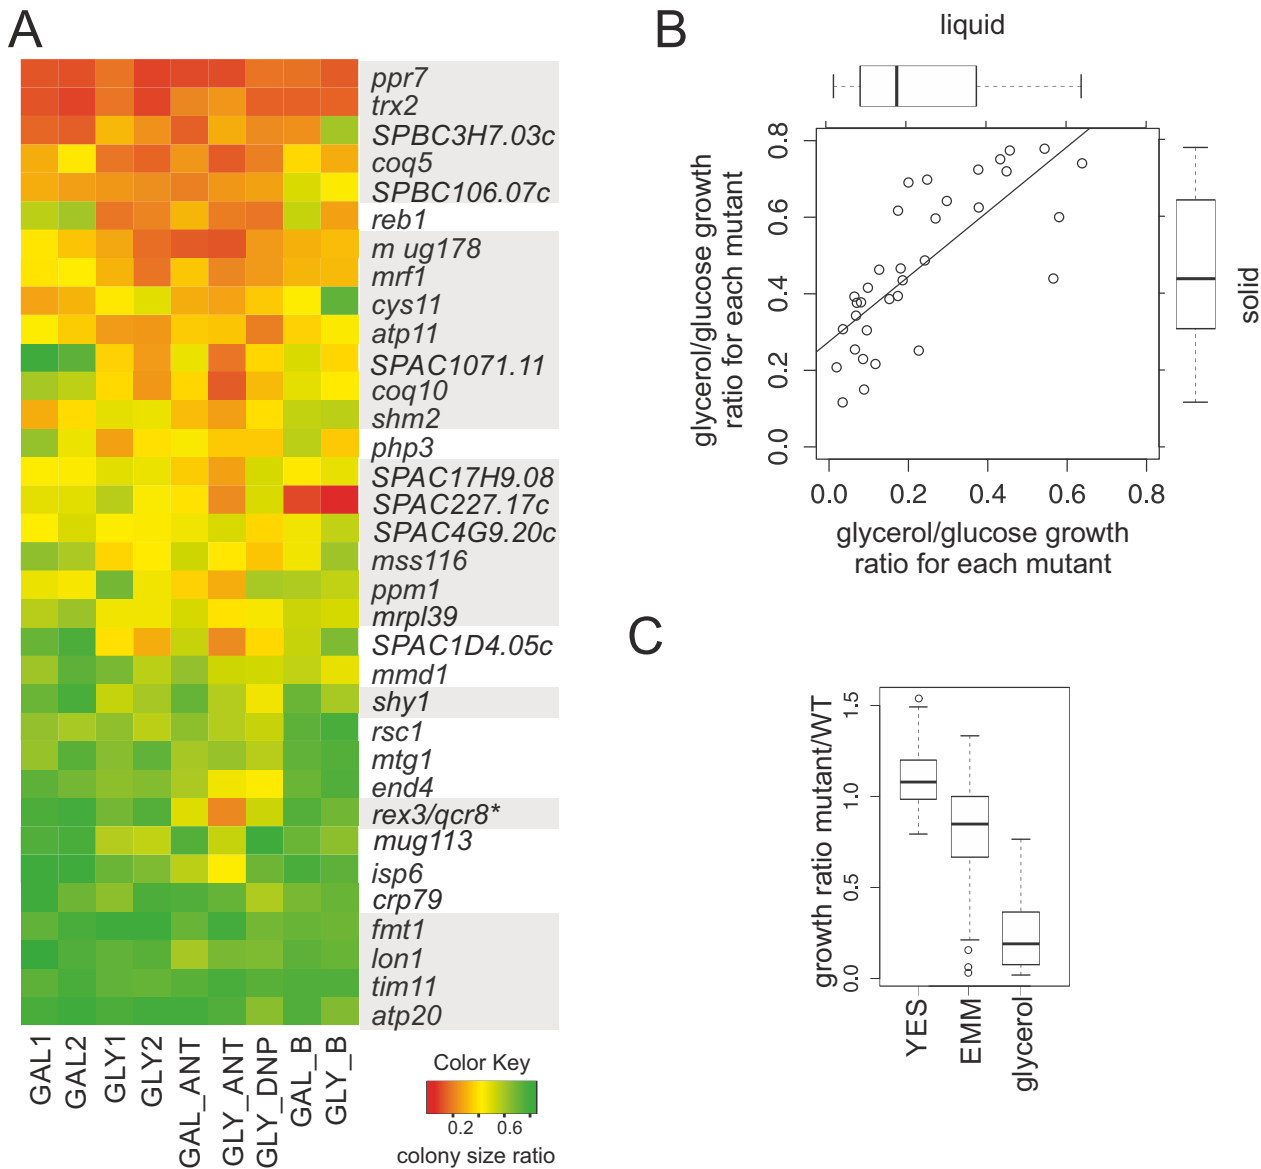

\* deletion of *rex3* influences expression of *qcr8*, which is most probable cause of respiratory phenotype of this mutant (data not shown)

S3 Figure

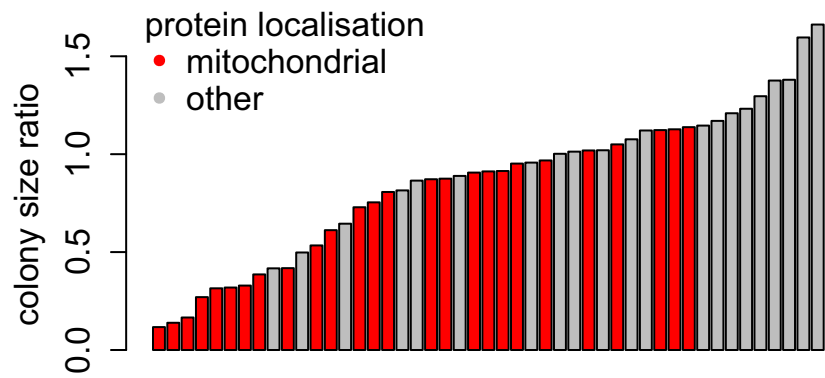

growth of auxotroph on glycerol vs glucose (S1 Table)  
data for 47 strains from FYPO:0001934

S4 Figure

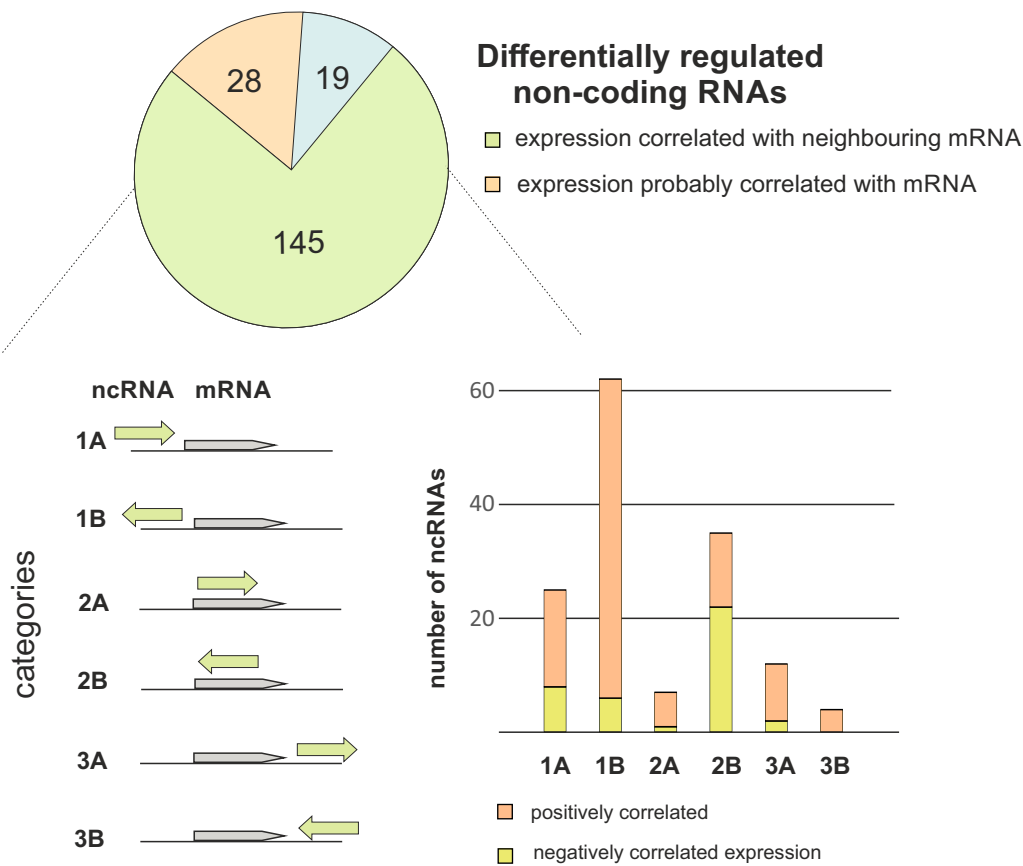

S5 Figure

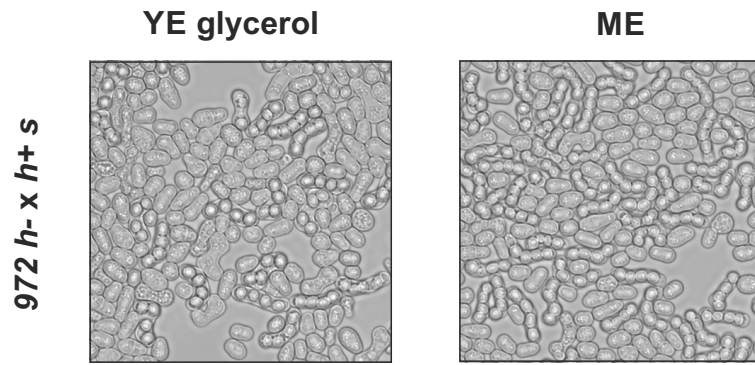

S6 Figure

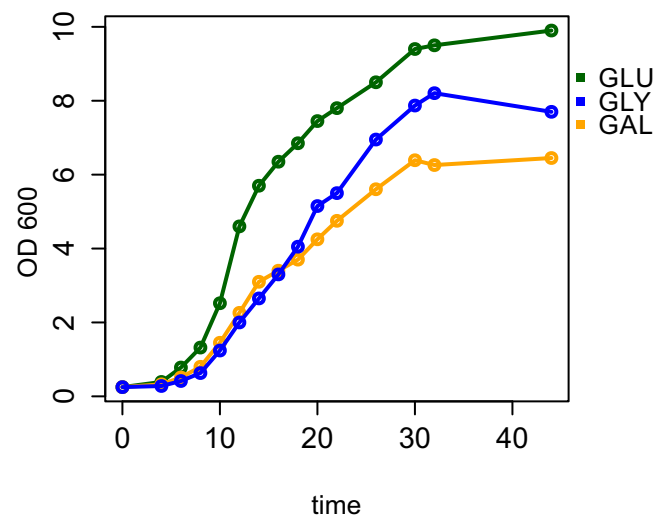

S7 Figure

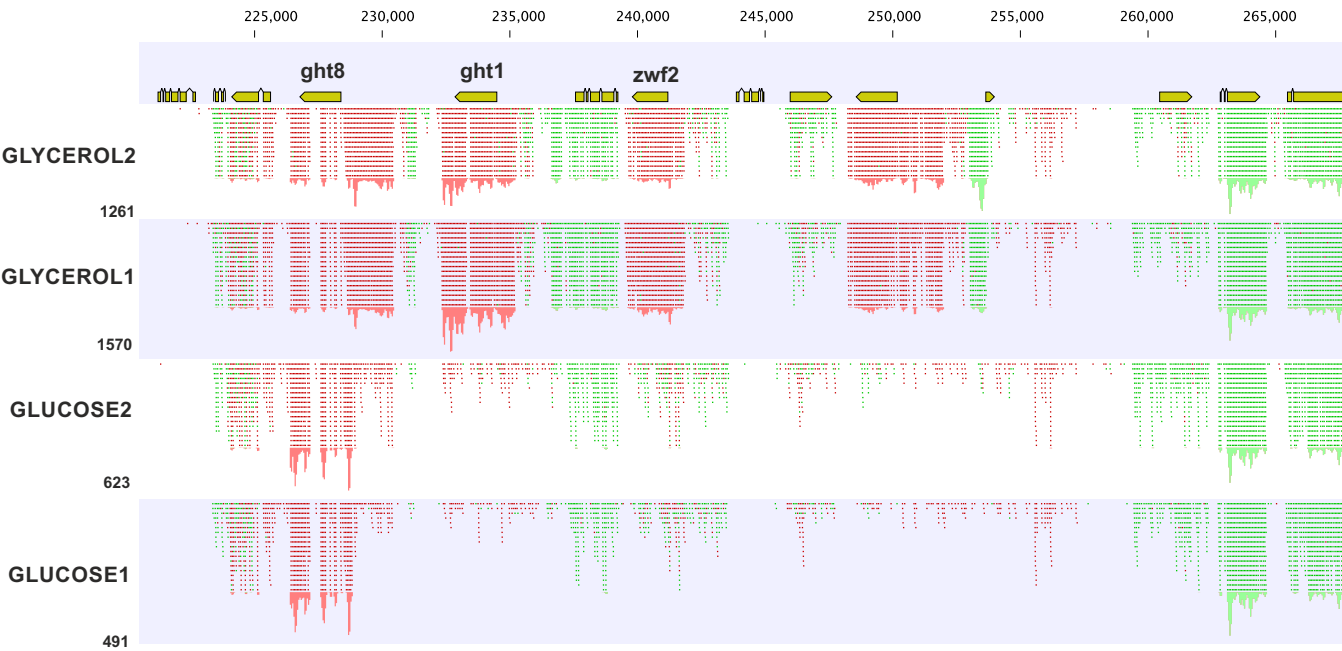

S8 Figure

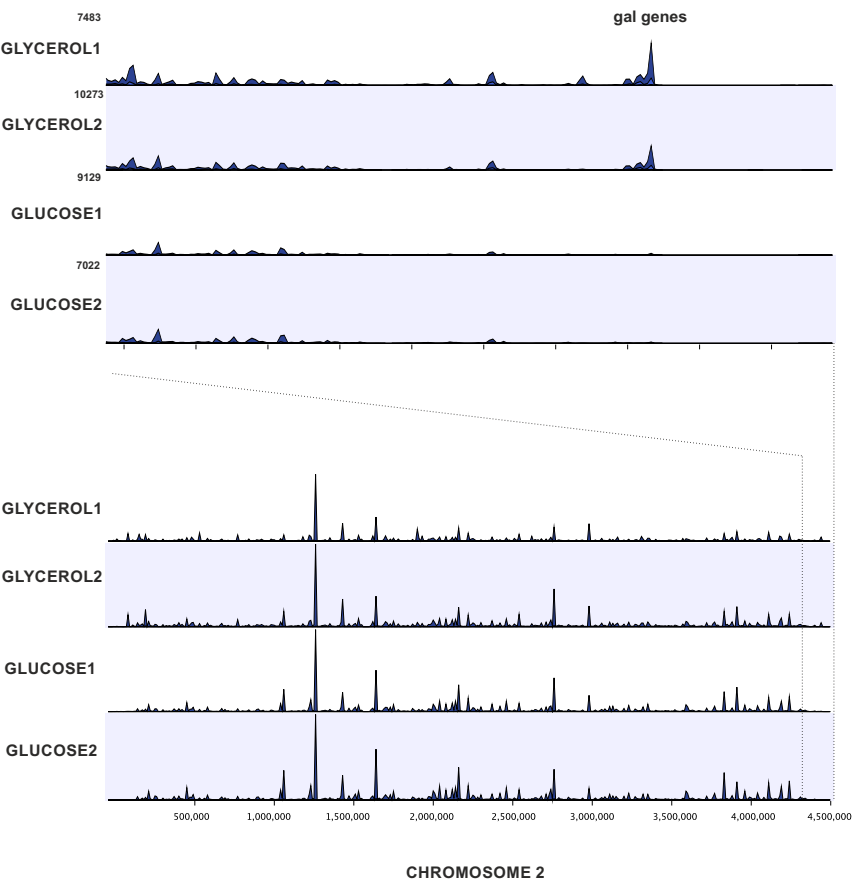

S9 Figure

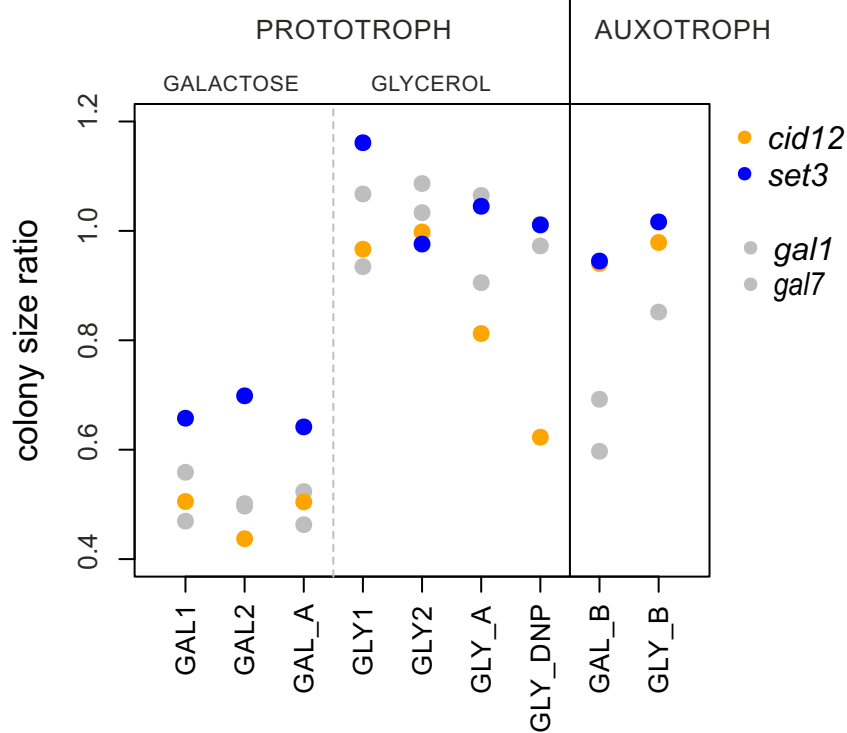

S10 Figure

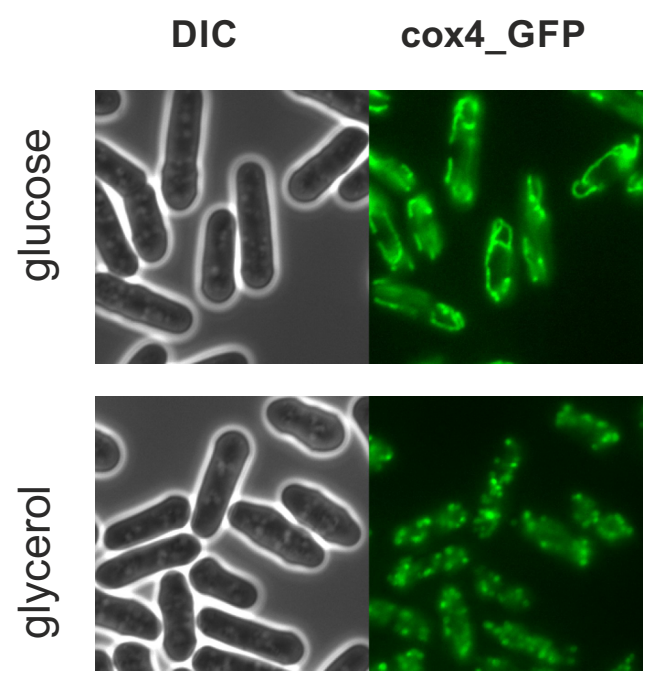

S11 Figure

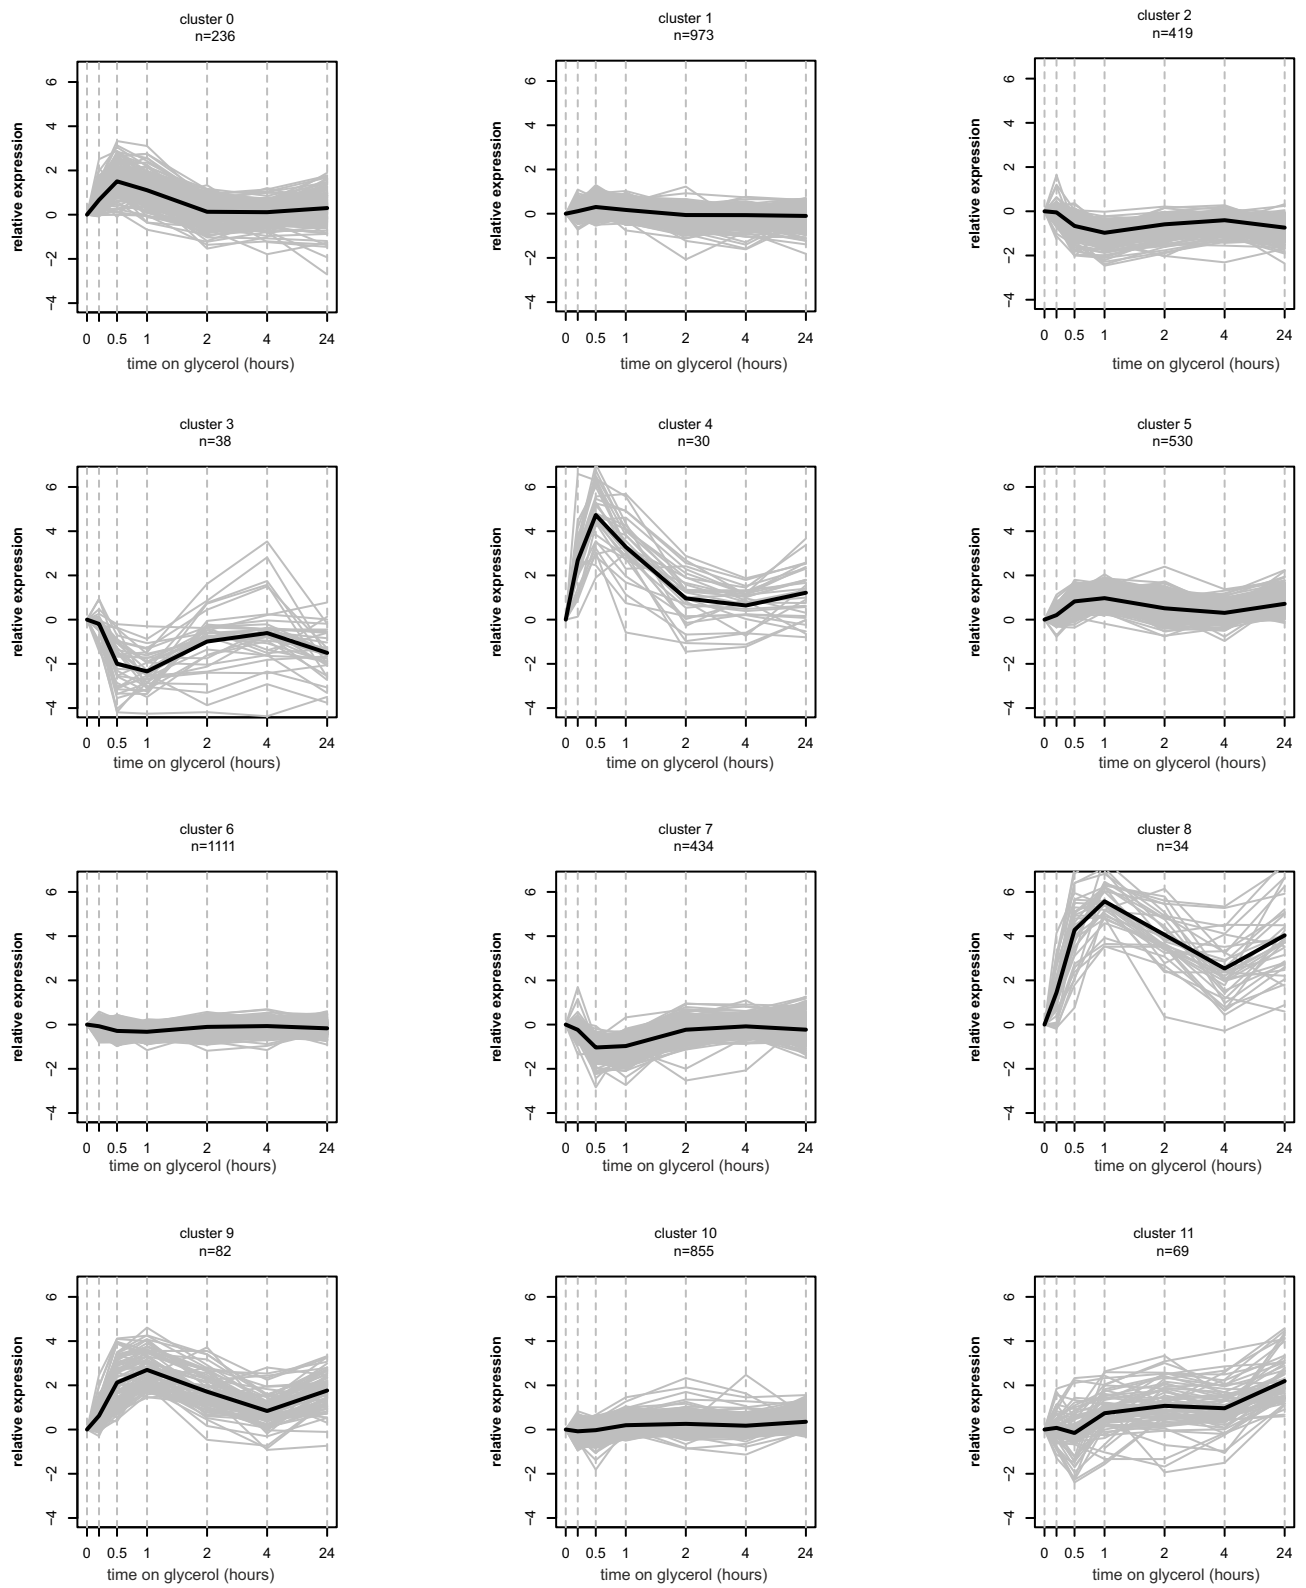

S12 Figure

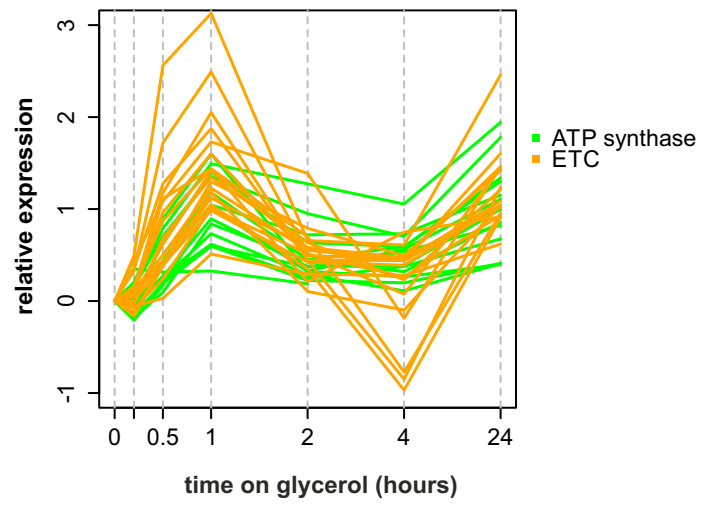

S13 Figure

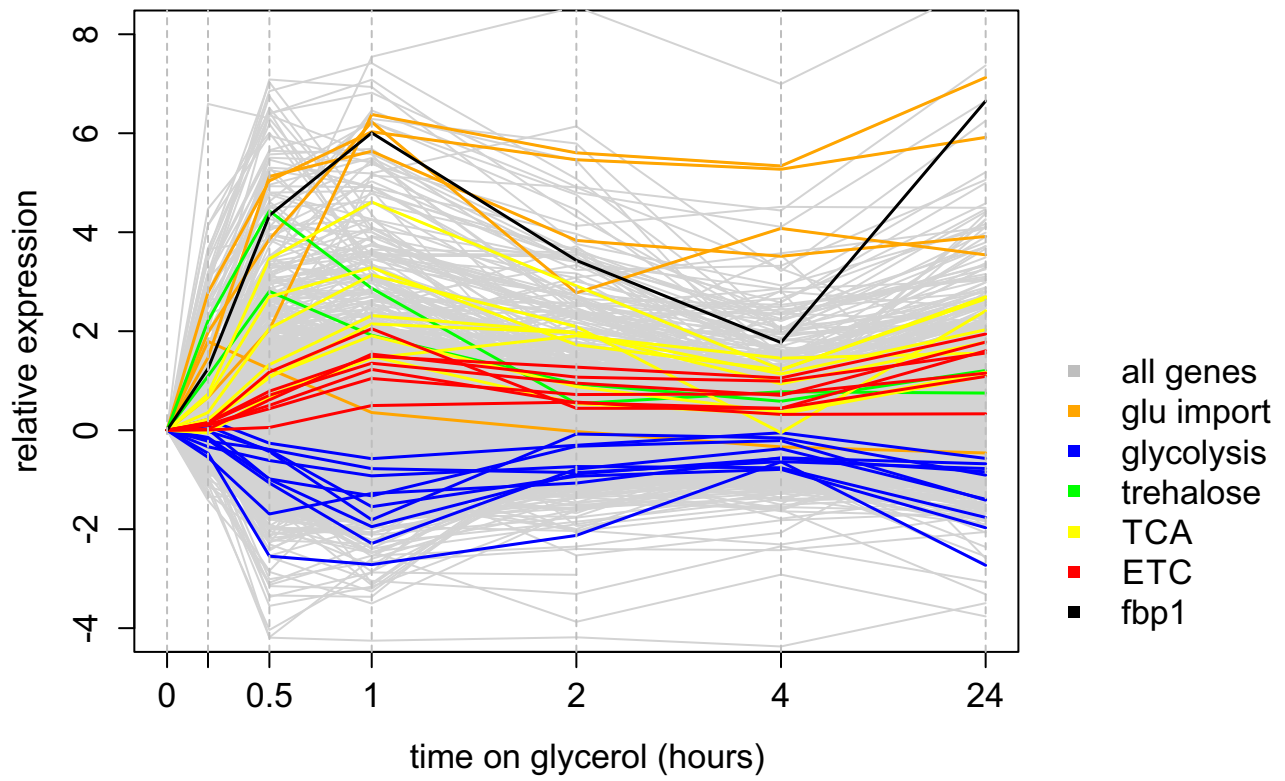

## S14 Figure

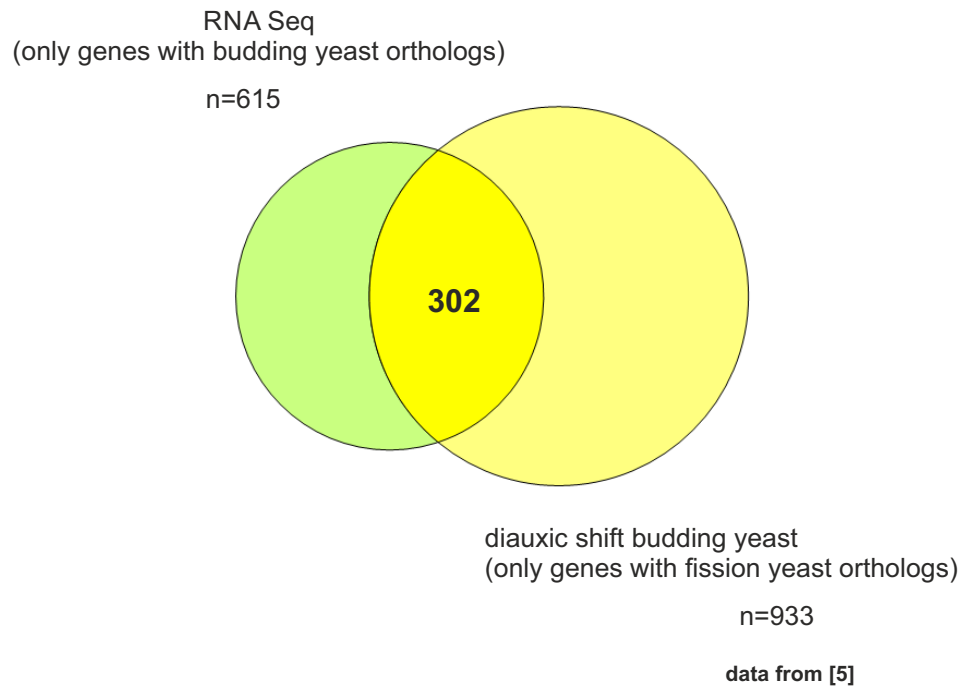

S15 Figure

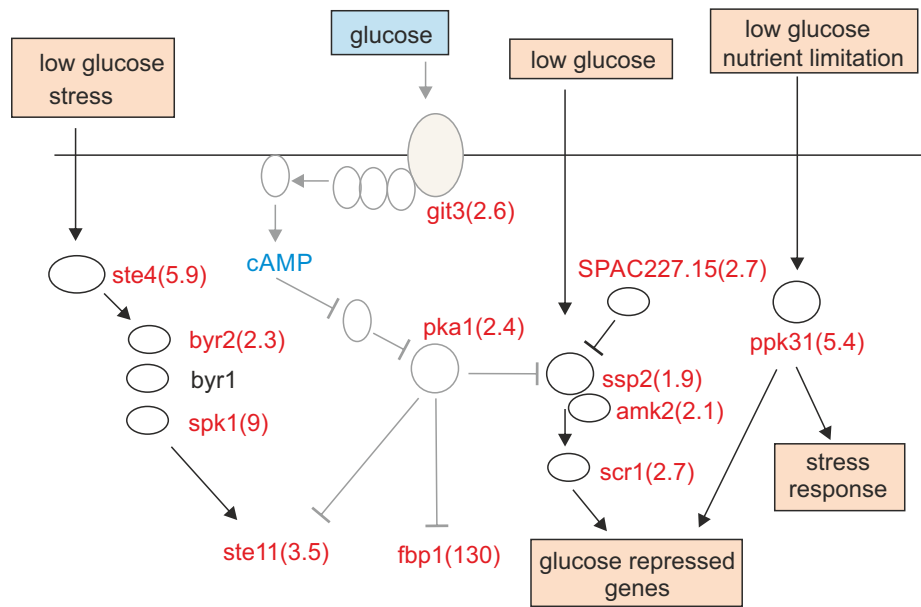

## S16 Figure

### Overlap of retrograde response pathway with genes altered upon iron depletion

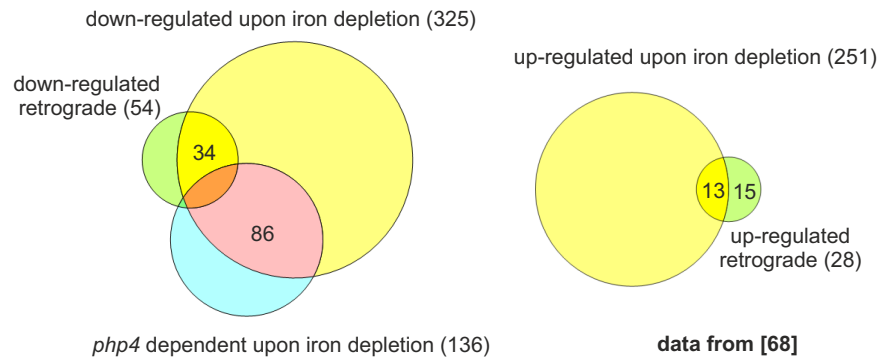

### Overlap of retrograde response pathway with core oxidative stress genes

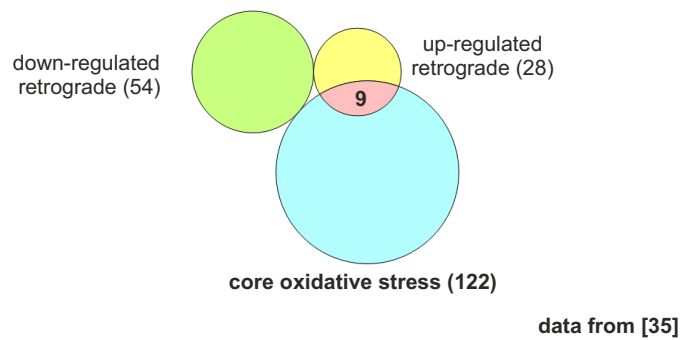

### Overlap of retrograde response pathway with core environmental stress response genes

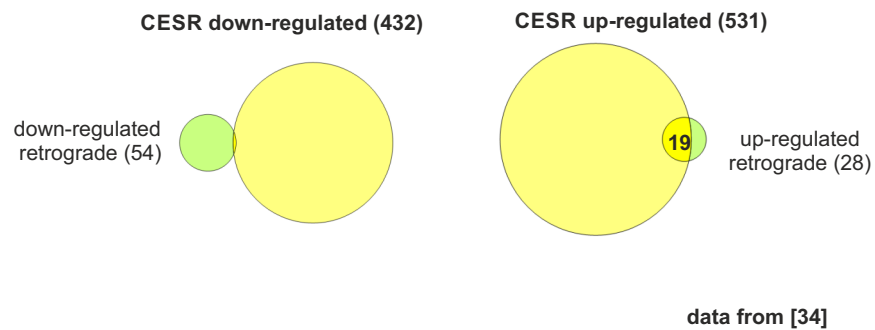

Supplement: Supplementary file 1 [file supplementary › Additional file 2 rev.pdf]
