# Supplementary material for: Functional and Regulatory Profiling of Energy Metabolism in Fission Yeast
Source: Preprints.org preprint supplement (doi:10.20944/preprints201610.0054.v1), 2016-10-14
Supplement: Supplementary file 1 [file supplementary]

Archive with 7 entries (7 files):
- Additional file 7.xlsx
- Additional file 1 rev.pdf
- Additional file 2 rev.pdf
- Additional file 3.xlsx
- Additional file 4.xlsx
- Additional file 5.xlsx
- Additional file 6.xlsx
