# Supplementary material for: Functional and Regulatory Profiling of Energy Metabolism in Fission Yeast
Source: Preprints.org preprint supplement (doi:10.20944/preprints201610.0054.v1), 2016-10-14
Supplement: Supplementary file 1 [file supplementary]

## Sheet: RNA-seq results
S2 Table. RNA-seq data
id	baseMean	baseMeanA	baseMeanB	foldChange	log2FoldChange	pval	padj	up-regulated	down-regulated	p < 0.05	cluster A	cluster P	RNA binding	transcrition factor
SPAC1002.01	47.9966	43.547	52.4462	1.20436	0.268267	0.671265	0.823882	NA	NA	NA	NA	NA	NA	NA
SPAC1002.02	545.155	421.711	668.598	1.58544	0.664885	0.00455013	0.0207944	NA	NA	1	NA	NA	NA	NA
SPAC1002.03c	3966.77	3820.29	4113.26	1.07669	0.1066	0.590003	0.766403	NA	NA	NA	NA	NA	NA	NA
SPAC1002.04c	308.055	298.34	317.771	1.06513	0.0910301	0.727315	0.86558	NA	NA	NA	NA	NA	NA	NA
SPAC1002.05c	135.618	82.1232	189.112	2.30279	1.20338	0.00335154	0.0164646	1	NA	1	NA	NA	NA	NA
SPAC1002.06c	6.58402	2.46129	10.7068	4.35006	2.12104	0.140346	0.288902	NA	NA	NA	NA	NA	NA	NA
SPAC1002.07c	918.894	1033.27	804.518	0.778614	-0.36102	0.0827632	0.196017	NA	NA	NA	NA	NA	NA	NA
SPAC1002.08c	245.763	270.413	221.113	0.817687	-0.290379	0.301802	0.499592	NA	NA	NA	NA	NA	NA	1
SPAC1002.09c	3602.92	2570.17	4635.68	1.80365	0.850918	6.25923e-05	0.000591927	NA	NA	1	NA	NA	NA	NA
SPAC1002.10c	411.258	437.137	385.379	0.881598	-0.181808	0.494801	0.686784	NA	NA	NA	NA	NA	NA	NA
SPAC1002.11	301.028	326.112	275.943	0.846162	-0.240995	0.350084	0.551392	NA	NA	NA	NA	NA	NA	NA
SPAC1002.12c	1543.81	831.326	2256.29	2.71408	1.44046	0.000777182	0.00498202	1	NA	1	NA	NA	NA	NA
SPAC1002.13c	9735.69	12519	6952.38	0.555347	-0.848539	0.0125676	0.0466557	NA	NA	1	NA	NA	NA	NA
SPAC1002.14	576.602	530.826	622.378	1.17247	0.229551	0.331726	0.532259	NA	NA	NA	NA	NA	NA	NA
SPAC1002.15c	221.458	235.915	207.001	0.877442	-0.188625	0.513684	0.70277	NA	NA	NA	NA	NA	NA	NA
SPAC1002.16c	47.8164	48.291	47.3417	0.980342	-0.0286429	1	1	NA	NA	NA	NA	NA	NA	NA
SPAC1002.17c	150.112	229.343	70.88	0.309056	-1.69406	6.89596e-05	0.000641257	NA	1	1	NA	NA	NA	NA
SPAC1002.18	829.908	959.369	700.447	0.730112	-0.45381	0.046053	0.126869	NA	NA	NA	NA	NA	NA	NA
SPAC1002.19	312.474	230.691	394.257	1.70902	0.773172	0.562463	0.744089	NA	NA	NA	NA	NA	NA	NA
SPAC1002.20	14.4122	12.6475	16.1769	1.27907	0.35509	0.72548	0.865005	NA	NA	NA	NA	NA	NA	NA
SPAC1006.01	2824.47	1562.39	4086.54	2.61557	1.38712	1.32301e-05	0.000155186	1	NA	1	NA	NA	NA	NA
SPAC1006.02	453.224	508.943	397.505	0.781039	-0.356534	0.14522	0.295839	NA	NA	NA	NA	NA	NA	NA
SPAC1006.03c	1124.04	1163.42	1084.66	0.932303	-0.10113	0.59237	0.767099	NA	NA	NA	NA	NA	NA	NA
SPAC1006.04c	107.497	93.9904	121.003	1.2874	0.364456	0.478062	0.67244	NA	NA	NA	NA	NA	NA	NA
SPAC1006.05c	556.506	497.945	615.067	1.23521	0.304757	0.187981	0.35645	NA	NA	NA	NA	NA	NA	NA
SPAC1006.06	2382.76	2064.97	2700.54	1.30779	0.387126	0.0577396	0.15145	NA	NA	NA	NA	NA	NA	NA
SPAC1006.07	21417.4	28846.4	13988.5	0.484929	-1.04415	1.15817e-06	1.91671e-05	NA	1	1	NA	NA	1	NA
SPAC1006.08	337.988	342.236	333.74	0.975175	-0.0362673	0.849586	0.946092	NA	NA	NA	NA	NA	NA	NA
SPAC1006.09	1669.9	1463.31	1876.49	1.28236	0.358803	0.0840062	0.198258	NA	NA	NA	NA	NA	NA	NA
SPAC1039.01	330.578	355.306	305.85	0.860807	-0.216238	0.45552	0.652723	NA	NA	NA	NA	NA	NA	NA
SPAC1039.02	585.143	1122.49	47.796	0.0425804	-4.55367	8.78822e-06	0.000110034	NA	1	1	NA	NA	NA	NA
SPAC1039.03	367.634	391.169	344.099	0.87967	-0.184965	0.466319	0.663787	NA	NA	NA	NA	NA	NA	NA
SPAC1039.04	180.746	190.58	170.912	0.896797	-0.157147	0.579187	0.759076	NA	NA	NA	NA	NA	NA	NA
SPAC1039.05c	636.518	488.571	784.465	1.60563	0.683141	0.00268811	0.0138358	NA	NA	1	NA	NA	NA	1
SPAC1039.06	500.451	413.182	587.72	1.42243	0.508354	0.034382	0.101761	NA	NA	NA	NA	NA	NA	NA
SPAC1039.07c	298.264	161.825	434.703	2.68625	1.42559	0.000525986	0.00362925	1	NA	1	NA	NA	NA	NA
SPAC1039.08	209.539	109.262	309.816	2.83554	1.50362	6.56984e-07	1.18719e-05	1	NA	1	NA	NA	NA	NA
SPAC1039.09	586.667	52.0843	1121.25	21.5276	4.42812	5.25015e-08	1.21043e-06	1	NA	1	NA	NA	NA	NA
SPAC1039.10	69.157	16.5952	121.719	7.3346	2.87472	4.03334e-09	1.19323e-07	1	NA	1	NA	NA	NA	NA
SPAC1039.11c	1029.22	317.729	1740.71	5.47861	2.45381	0.00101221	0.00619747	1	NA	1	NA	NA	NA	NA
SPAC105.01c	595.354	609.212	581.496	0.954504	-0.0671762	0.752502	0.881743	NA	NA	NA	NA	NA	NA	NA
SPAC105.02c	1331.26	1339.53	1322.99	0.98765	-0.0179288	0.956758	1	NA	NA	NA	NA	NA	NA	NA
SPAC105.03c	834.304	832.098	836.509	1.0053	0.00762714	0.979888	1	NA	NA	NA	NA	NA	NA	1
SPAC1071.01c	2056.72	2032.3	2081.13	1.02403	0.0342518	0.89987	0.973172	NA	NA	NA	NA	NA	NA	NA
SPAC1071.02	1123.68	1311.39	935.96	0.713714	-0.486583	0.0271823	0.0848068	NA	NA	NA	NA	1	NA	NA
SPAC1071.03c	729.008	815.812	642.204	0.787196	-0.345206	0.12979	0.272629	NA	NA	NA	NA	NA	NA	NA
SPAC1071.04c	107.041	110.894	103.187	0.930498	-0.103925	0.776217	0.901318	NA	NA	NA	NA	NA	NA	NA
SPAC1071.05	1121.69	1271.08	972.293	0.764935	-0.38659	0.0684672	0.170239	NA	NA	NA	NA	NA	NA	NA
SPAC1071.06	960.679	1020.54	900.816	0.882684	-0.180032	0.401917	0.604005	NA	NA	NA	NA	NA	NA	NA
SPAC1071.07c	10791.8	14679.4	6904.14	0.470329	-1.08826	0.000132702	0.00111463	NA	1	1	NA	NA	1	NA
SPAC1071.08	3630.22	5192.81	2067.63	0.398173	-1.32853	7.48517e-05	0.00069052	NA	1	1	NA	NA	NA	NA
SPAC1071.09c	603.994	630.357	577.631	0.916355	-0.126022	0.607935	0.777478	NA	NA	NA	NA	NA	NA	NA
SPAC1071.10c	58587.6	75017.6	42157.5	0.561969	-0.831439	0.00151957	0.00869532	NA	NA	1	NA	NA	NA	NA
SPAC1071.11	364.709	387.708	341.709	0.881357	-0.182201	0.487767	0.680837	NA	NA	NA	NA	1	NA	NA
SPAC1071.12c	372.208	486.922	257.493	0.528818	-0.919156	0.000300354	0.00222635	NA	NA	1	NA	NA	NA	NA
SPAC1071.13	591.819	381.843	801.794	2.0998	1.07025	0.310448	0.508864	NA	NA	NA	NA	NA	NA	NA
SPAC1093.01	1998.13	1839.45	2156.81	1.17253	0.229626	0.562133	0.7438	NA	NA	NA	NA	NA	NA	NA
SPAC1093.02	1768.18	1954.07	1582.28	0.809735	-0.304477	0.131622	0.27518	NA	NA	NA	NA	NA	NA	NA
SPAC1093.03	855.674	787.454	923.893	1.17327	0.23053	0.308387	0.506906	NA	NA	NA	NA	NA	NA	NA
SPAC1093.04c	499.516	525.051	473.981	0.902733	-0.147629	0.546266	0.730467	NA	NA	NA	NA	NA	1	NA
SPAC1093.05	1607.45	2094.06	1120.85	0.535249	-0.901718	1.74418e-05	0.000195337	NA	NA	1	NA	NA	NA	NA
SPAC1093.06c	1147.52	1357.12	937.933	0.691121	-0.532989	0.0141412	0.0510245	NA	NA	NA	NA	NA	NA	NA
SPAC1093.07	48.5298	55.0491	42.0105	0.763147	-0.389967	0.407154	0.606964	NA	NA	NA	NA	NA	NA	NA
SPAC10F6.01c	6754.84	8332.82	5176.86	0.621261	-0.686728	0.00881089	0.035343	NA	NA	1	NA	NA	NA	NA
SPAC10F6.02c	1604.76	1849.47	1360.06	0.735379	-0.44344	0.0346866	0.102255	NA	NA	NA	NA	NA	NA	NA
SPAC10F6.03c	3825.36	5959.64	1691.07	0.283754	-1.81729	5.98691e-09	1.65407e-07	NA	1	1	NA	NA	NA	NA
SPAC10F6.04	435.878	332.505	539.252	1.62179	0.697584	0.0067559	0.0287158	NA	NA	1	NA	NA	NA	NA
SPAC10F6.05c	624.183	590.409	657.957	1.11441	0.156279	0.463226	0.66051	NA	NA	NA	NA	NA	NA	NA
SPAC10F6.06	5249.18	3671.46	6826.89	1.85945	0.894873	0.00216711	0.0116473	NA	NA	1	NA	NA	1	NA
SPAC10F6.07c	62.6092	56.6899	68.5286	1.20883	0.273613	0.608275	0.777615	NA	NA	NA	NA	NA	NA	NA
SPAC10F6.08c	773.944	735.841	812.046	1.10356	0.142167	0.528261	0.715114	NA	NA	NA	NA	NA	NA	NA
SPAC10F6.09c	1682.13	1409.3	1954.96	1.38719	0.472166	0.0239475	0.0767927	NA	NA	NA	NA	NA	NA	NA
SPAC10F6.10	655.733	967.784	343.681	0.355122	-1.49362	1.06282e-10	4.22977e-09	NA	1	1	NA	NA	NA	NA
SPAC10F6.11c	599.843	438.834	760.852	1.73381	0.793942	0.0820144	0.194657	NA	NA	NA	NA	NA	NA	NA
SPAC10F6.12c	669.875	455.072	884.679	1.94404	0.95906	0.0144	0.0516237	NA	NA	NA	NA	NA	NA	NA
SPAC10F6.13c	1233.71	1464.85	1002.57	0.68442	-0.547047	0.0118753	0.0446558	NA	NA	1	NA	NA	NA	NA
SPAC10F6.14c	853.569	705.461	1001.68	1.41989	0.505778	0.0236826	0.076199	NA	NA	NA	NA	NA	NA	NA
SPAC10F6.15	7.95106	8.53728	7.36484	0.862668	-0.213123	1	1	NA	NA	NA	NA	NA	NA	NA
SPAC10F6.16	1014.83	1020.21	1009.45	0.989457	-0.0152908	0.947977	0.996255	NA	NA	NA	NA	NA	NA	NA
SPAC10F6.17c	1265.12	904.473	1625.76	1.79746	0.845963	8.94488e-05	0.000801682	NA	NA	1	NA	NA	NA	NA
SPAC110.01	1710.89	1645.61	1776.17	1.07934	0.110143	0.571037	0.752603	NA	NA	NA	NA	NA	NA	NA
SPAC110.02	683.892	645.498	722.287	1.11896	0.16216	0.496326	0.688258	NA	NA	NA	NA	NA	NA	NA
SPAC110.03	2222.53	2285.52	2159.53	0.944874	-0.081806	0.697183	0.846021	NA	NA	NA	NA	NA	NA	NA
SPAC110.04c	24364.4	32545.1	16183.7	0.497269	-1.0079	1.47458e-06	2.36995e-05	NA	1	1	NA	NA	NA	NA
SPAC110.05	86.965	83.4552	90.4747	1.08411	0.116514	0.75874	0.886877	NA	NA	NA	NA	NA	NA	NA
SPAC1142.01	1122.07	1173.33	1070.8	0.912621	-0.131912	0.540835	0.725818	NA	NA	NA	NA	NA	NA	NA
SPAC1142.02c	1475.45	1432.51	1518.4	1.05996	0.0840083	0.656636	0.812924	NA	NA	NA	NA	NA	NA	NA
SPAC1142.03c	1135.89	902.914	1368.87	1.51605	0.60032	0.00494618	0.0222096	NA	NA	1	NA	NA	NA	NA
SPAC1142.04	1634.7	2389.58	879.829	0.368194	-1.44146	9.17779e-12	4.5793e-10	NA	1	1	NA	NA	NA	NA
SPAC1142.05	876.552	1336.19	416.913	0.312016	-1.68031	5.80756e-14	4.26696e-12	NA	1	1	NA	NA	NA	NA
SPAC1142.06	1690.46	1882.09	1498.83	0.79636	-0.328507	0.104465	0.233674	NA	NA	NA	NA	NA	NA	NA
SPAC1142.07c	898.941	800.736	997.147	1.24529	0.31648	0.145444	0.296023	NA	NA	NA	NA	NA	NA	NA
SPAC1142.08	1078.72	849.035	1308.41	1.54105	0.623916	0.00354292	0.0171695	NA	NA	1	NA	NA	NA	1
SPAC1142.09	4.83182	2.29881	7.36484	3.20376	1.67977	0.35056	0.55198	NA	NA	NA	NA	NA	NA	NA
SPAC11D3.01c	741.476	44.5138	1438.44	32.3144	5.01411	0.0988648	0.22414	NA	NA	NA	NA	NA	NA	NA
SPAC11D3.02c	501.849	709.206	294.491	0.415241	-1.26798	1.23879e-07	2.5964e-06	NA	1	1	NA	NA	NA	NA
SPAC11D3.03c	18.4218	13.1349	23.7088	1.80502	0.852018	0.254093	0.4438	NA	NA	NA	1	NA	NA	NA
SPAC11D3.04c	306.962	423.051	190.872	0.45118	-1.14822	1.15878e-05	0.000139345	NA	1	1	NA	NA	NA	NA
SPAC11D3.05	141.885	184.48	99.2903	0.538216	-0.893743	0.00709814	0.0299043	NA	NA	1	NA	NA	NA	NA
SPAC11D3.06	282.123	193.862	370.384	1.91055	0.93399	0.000613299	0.00411048	NA	NA	1	NA	NA	NA	NA
SPAC11D3.07c	614.846	614.745	614.947	1.00033	0.000473756	0.973261	1	NA	NA	NA	NA	NA	NA	1
SPAC11D3.08c	572.779	367.864	777.695	2.11409	1.08003	0.00343359	0.0167569	1	NA	1	NA	NA	NA	NA
SPAC11D3.09	37.5589	21.3633	53.7545	2.51621	1.33125	0.0344149	0.101768	NA	NA	NA	NA	NA	NA	NA
SPAC11D3.10	109.532	95.2742	123.79	1.2993	0.377737	0.327324	0.527856	NA	NA	NA	NA	NA	NA	NA
SPAC11D3.11c	286.874	271.745	302.004	1.11135	0.152313	0.599851	0.771697	NA	NA	NA	NA	NA	NA	1
SPAC11D3.13	323.35	456.689	190.011	0.416063	-1.26512	1.62593e-06	2.56996e-05	NA	1	1	NA	NA	NA	NA
SPAC11D3.14c	344.926	284.19	405.663	1.42744	0.513427	0.0902867	0.209257	NA	NA	NA	NA	NA	NA	NA
SPAC11D3.15	1665.5	1054.34	2276.65	2.15931	1.11057	0.0207719	0.0690264	NA	NA	NA	NA	NA	NA	NA
SPAC11D3.16c	281.662	230.017	333.307	1.44905	0.535111	0.0527423	0.140716	NA	NA	NA	NA	NA	NA	NA
SPAC11D3.17	180.315	202.895	157.736	0.777427	-0.363222	0.240212	0.42522	NA	NA	NA	NA	NA	NA	1
SPAC11D3.18c	350.534	47.1617	653.906	13.8652	3.7934	0.000947343	0.00584851	1	NA	1	NA	NA	NA	NA
SPAC11D3.19	82.534	35.6596	129.408	3.62899	1.85957	1.53005e-05	0.000175772	1	NA	1	NA	NA	NA	NA
SPAC11E3.01c	1814.55	1945.9	1683.2	0.864996	-0.209235	0.327765	0.528184	NA	NA	NA	NA	NA	NA	NA
SPAC11E3.02c	932.016	715.826	1148.21	1.60403	0.6817	0.00196282	0.0107569	NA	NA	1	NA	NA	NA	NA
SPAC11E3.03	289.6	301.467	277.734	0.921276	-0.118295	0.648008	0.806061	NA	NA	NA	NA	NA	NA	NA
SPAC11E3.04c	801.266	782.873	819.66	1.04699	0.0662472	0.802165	0.917426	NA	NA	NA	NA	NA	NA	NA
SPAC11E3.05	1189.62	916.276	1462.97	1.59665	0.675048	0.00173357	0.00969926	NA	NA	1	NA	NA	NA	NA
SPAC11E3.06	235.967	57.1773	414.756	7.25386	2.85875	6.51158e-20	9.67475e-18	1	NA	1	NA	NA	NA	1
SPAC11E3.07	1477.35	1595.73	1358.98	0.851634	-0.231694	0.260194	0.450766	NA	NA	NA	NA	NA	NA	NA
SPAC11E3.08c	131.005	119.911	142.099	1.18503	0.244927	0.440895	0.638887	NA	NA	NA	NA	NA	NA	NA
SPAC11E3.09	346.066	358.799	333.333	0.929025	-0.10621	0.679463	0.831422	NA	NA	NA	NA	NA	NA	NA
SPAC11E3.10	449.477	385.71	513.243	1.33064	0.412124	0.0824335	0.195374	NA	NA	NA	NA	NA	NA	NA
SPAC11E3.11c	1744.62	1655.05	1834.19	1.10824	0.14827	0.481512	0.675349	NA	NA	NA	NA	NA	NA	NA
SPAC11E3.12	218.81	165.968	271.652	1.63678	0.710858	0.0199688	0.0669549	NA	NA	NA	NA	NA	NA	NA
SPAC11E3.13c	1960.2	1872.37	2048.04	1.09382	0.129376	0.582038	0.761357	NA	NA	NA	NA	NA	NA	NA
SPAC11E3.14	1184.08	876.311	1491.85	1.70242	0.767591	0.103964	0.232632	NA	NA	NA	NA	NA	NA	NA
SPAC11E3.15	5475.75	7840.11	3111.39	0.396855	-1.33331	3.25587e-07	6.23746e-06	NA	1	1	NA	NA	NA	NA
SPAC11G7.01	2526.46	2218.65	2834.26	1.27747	0.353287	0.0787458	0.188988	NA	NA	NA	NA	NA	NA	NA
SPAC11G7.02	3501.63	3029.25	3974.01	1.31188	0.391637	0.0470022	0.128952	NA	NA	NA	NA	NA	NA	NA
SPAC11G7.03	3483.47	1396.67	5570.27	3.98824	1.99575	1.9612e-05	0.00021665	1	NA	1	NA	NA	NA	NA
SPAC11G7.04	3215.25	4203.51	2226.99	0.529793	-0.9165	9.60913e-06	0.000118755	NA	NA	1	NA	NA	NA	NA
SPAC11G7.05c	145.879	137.83	153.928	1.11679	0.159362	0.632209	0.794474	NA	NA	NA	NA	NA	NA	NA
SPAC11G7.06c	102.503	135.206	69.7994	0.516243	-0.953877	0.00881957	0.0353523	NA	NA	1	1	NA	NA	NA
SPAC11H11.01	474.064	332.497	615.631	1.85154	0.888726	0.000206633	0.00163497	NA	NA	1	NA	NA	NA	NA
SPAC11H11.02c	159.957	182.027	137.886	0.757505	-0.400673	0.20549	0.380583	NA	NA	NA	NA	NA	NA	NA
SPAC11H11.03c	174.262	152.801	195.724	1.28091	0.357167	0.264357	0.456126	NA	NA	NA	NA	NA	NA	NA
SPAC11H11.04	423.303	23.8165	822.789	34.547	5.11049	5.07583e-22	8.93078e-20	1	NA	1	NA	NA	NA	NA
SPAC11H11.05c	24.6809	26.9518	22.4099	0.831479	-0.266249	0.657512	0.813216	NA	NA	NA	NA	NA	NA	NA
SPAC11H11.06	2331.89	2135.83	2527.94	1.18359	0.243166	0.221318	0.401556	NA	NA	NA	NA	NA	NA	NA
SPAC1250.01	3047.77	2783.01	3312.52	1.19027	0.251283	0.191676	0.36161	NA	NA	NA	NA	NA	NA	NA
SPAC1250.02	10.0689	6.57146	13.5663	2.06442	1.04574	0.457159	0.654371	NA	NA	NA	NA	NA	NA	NA
SPAC1250.03	983.426	781.97	1184.88	1.51525	0.599558	0.0131945	0.0484452	NA	NA	1	NA	NA	NA	NA
SPAC1250.04c	76.4816	108.604	44.3595	0.408453	-1.29176	0.00150893	0.00865986	NA	1	1	1	NA	NA	NA
SPAC1250.05	1239.67	1860.68	618.661	0.332491	-1.58861	1.33994e-13	9.43034e-12	NA	1	1	NA	NA	NA	NA
SPAC1250.07	419.571	339.002	500.139	1.47533	0.561036	0.0394565	0.112786	NA	NA	NA	NA	NA	NA	NA
SPAC1296.01c	1850.11	1420.39	2279.83	1.60507	0.682634	0.000850711	0.00534071	NA	NA	1	NA	NA	NA	NA
SPAC1296.02	1739.55	1256.11	2222.99	1.76975	0.823542	6.01935e-05	0.000573295	NA	NA	1	1	NA	NA	NA
SPAC1296.03c	267.732	140.633	394.831	2.80754	1.4893	1.16063e-07	2.47836e-06	1	NA	1	NA	NA	NA	NA
SPAC1296.04	305.72	239.351	372.089	1.55458	0.636522	0.0144924	0.0518162	NA	NA	NA	NA	NA	NA	NA
SPAC1296.05c	537.942	493.331	582.553	1.18086	0.239833	0.29753	0.495093	NA	NA	NA	NA	NA	NA	NA
SPAC1296.06	317.213	322.132	312.294	0.969461	-0.044745	0.919566	0.981673	NA	NA	NA	NA	NA	NA	NA
SPAC12B10.01c	3125.64	2182.99	4068.29	1.86363	0.898115	0.00538926	0.0238627	NA	NA	1	NA	NA	NA	NA
SPAC12B10.02c	688.006	672.417	703.594	1.04637	0.0653863	0.776676	0.901537	NA	NA	NA	NA	NA	NA	NA
SPAC12B10.03	398.071	381.315	414.826	1.08788	0.121522	0.655408	0.811792	NA	NA	NA	1	NA	NA	NA
SPAC12B10.04	489.839	555.471	424.206	0.763687	-0.388947	0.0928595	0.213647	NA	NA	NA	1	NA	NA	NA
SPAC12B10.05	722.434	733.071	711.797	0.970979	-0.042488	0.842837	0.942185	NA	NA	NA	NA	NA	NA	NA
SPAC12B10.06c	240.51	221.749	259.271	1.16921	0.225536	0.374427	0.576691	NA	NA	NA	NA	NA	NA	NA
SPAC12B10.07	766.924	722.357	811.491	1.12339	0.167862	0.448625	0.646417	NA	NA	NA	NA	NA	NA	NA
SPAC12B10.08c	90.8355	72.1156	109.556	1.51917	0.603279	0.115033	0.250116	NA	NA	NA	NA	NA	NA	NA
SPAC12B10.09	157.32	181.385	133.255	0.734652	-0.444868	0.149461	0.301645	NA	NA	NA	1	NA	NA	NA
SPAC12B10.10	293.535	258.269	328.802	1.2731	0.348345	0.201419	0.375331	NA	NA	NA	NA	NA	NA	NA
SPAC12B10.11	228.453	216.842	240.064	1.10709	0.146775	0.581331	0.760771	NA	NA	NA	NA	1	NA	NA
SPAC12B10.12c	300.085	328.379	271.791	0.827675	-0.272863	0.331414	0.532013	NA	NA	NA	NA	NA	NA	NA
SPAC12B10.13	344.026	204.552	483.501	2.36371	1.24105	0.00485418	0.0218405	1	NA	1	NA	NA	NA	NA
SPAC12B10.14c	885.891	821.912	949.869	1.15568	0.208745	0.337466	0.538111	NA	NA	NA	NA	NA	NA	NA
SPAC12B10.15c	139.929	137.497	142.36	1.03537	0.0501438	0.871678	0.957935	NA	NA	NA	NA	NA	NA	NA
SPAC12B10.16c	1203.31	865.622	1541	1.78023	0.832061	9.1415e-05	0.000813102	NA	NA	1	NA	NA	NA	NA
SPAC12G12.01c	1193.42	1210.76	1176.09	0.971365	-0.0419145	0.85005	0.94645	NA	NA	NA	NA	NA	NA	NA
SPAC12G12.02	769.089	1184.25	353.924	0.298858	-1.74247	3.09054e-14	2.34811e-12	NA	1	1	NA	NA	NA	NA
SPAC12G12.03	3277.41	2883.45	3671.36	1.27325	0.348519	0.074967	0.182199	NA	NA	NA	NA	NA	1	NA
SPAC12G12.04	10238.5	12334.7	8142.3	0.660111	-0.59922	0.0208976	0.0694094	NA	NA	NA	NA	NA	NA	NA
SPAC12G12.05c	592.496	690.102	494.891	0.717127	-0.479699	0.0438749	0.122228	NA	NA	NA	NA	NA	NA	NA
SPAC12G12.06c	1027.77	1496.32	559.214	0.373726	-1.41995	7.22854e-11	3.02062e-09	NA	1	1	NA	NA	NA	NA
SPAC12G12.07c	2529.75	2666.93	2392.57	0.897122	-0.156624	0.449188	0.646978	NA	NA	NA	NA	NA	NA	NA
SPAC12G12.08	402.451	369.968	434.934	1.1756	0.233397	0.346419	0.547813	NA	NA	NA	NA	NA	1	NA
SPAC12G12.09	698.354	679.842	716.867	1.05446	0.0765075	0.763771	0.891199	NA	NA	NA	NA	NA	NA	NA
SPAC12G12.10	319.839	338.93	300.749	0.887349	-0.172426	0.498798	0.690019	NA	NA	NA	NA	NA	NA	NA
SPAC12G12.11c	919.248	683.895	1154.6	1.68827	0.755547	0.013296	0.048791	NA	NA	1	NA	NA	NA	NA
SPAC12G12.12	446.733	394.109	499.357	1.26705	0.341475	0.149469	0.301645	NA	NA	NA	NA	NA	NA	NA
SPAC12G12.13c	1104.51	1443.78	765.231	0.530019	-0.915884	1.90688e-05	0.000211433	NA	NA	1	NA	NA	NA	NA
SPAC12G12.14c	681.61	722.69	640.529	0.886312	-0.174114	0.450166	0.647936	NA	NA	NA	NA	NA	NA	NA
SPAC12G12.15	904.99	849.993	959.987	1.12941	0.175563	0.417853	0.615773	NA	NA	NA	NA	NA	NA	NA
SPAC12G12.16c	122.032	102.357	141.707	1.38444	0.469302	0.187727	0.356171	NA	NA	NA	NA	NA	NA	NA
SPAC12G12.17	143.821	140.966	146.676	1.04051	0.057294	0.904767	0.974275	NA	NA	NA	NA	NA	NA	NA
SPAC1327.01c	876.382	706.258	1046.51	1.48176	0.567315	0.00935404	0.0368322	NA	NA	1	NA	NA	NA	1
SPAC139.01c	1890.59	1936.61	1844.57	0.952476	-0.0702458	0.730103	0.866929	NA	NA	NA	NA	NA	NA	NA
SPAC139.02c	646.903	820.913	472.893	0.576058	-0.795715	0.00057035	0.00389118	NA	NA	1	NA	NA	NA	NA
SPAC139.03	377.111	388.204	366.017	0.942849	-0.0849014	0.747415	0.879328	NA	NA	NA	NA	NA	NA	1
SPAC139.04c	308	217.671	398.329	1.82996	0.871815	0.00644711	0.0277373	NA	NA	1	NA	NA	NA	NA
SPAC139.05	414.16	143.76	684.561	4.76184	2.25152	0.215158	0.39369	NA	NA	NA	NA	NA	NA	NA
SPAC139.06	687.099	787.26	586.939	0.745547	-0.423629	0.0597698	0.155193	NA	NA	NA	NA	NA	NA	NA
SPAC1399.01c	292.184	176.926	407.442	2.30289	1.20345	7.91919e-06	0.00010028	1	NA	1	NA	NA	NA	NA
SPAC1399.02	269.171	321.986	216.355	0.671942	-0.573592	0.0386946	0.111178	NA	NA	NA	NA	NA	NA	NA
SPAC1399.03	897.575	1190.86	604.285	0.507434	-0.978708	1.0253e-05	0.000125553	NA	NA	1	NA	NA	NA	NA
SPAC1399.04c	104.446	105.298	103.594	0.983815	-0.0235415	1	1	NA	NA	NA	NA	NA	NA	NA
SPAC1399.05c	245.773	235.062	256.484	1.09113	0.125827	0.60678	0.776595	NA	NA	NA	NA	NA	NA	1
SPAC1399.06	203.844	185.487	222.201	1.19793	0.260542	0.390953	0.592321	NA	NA	NA	NA	NA	NA	NA
SPAC13A11.01c	1682.45	1541.3	1823.61	1.18317	0.242655	0.23588	0.419999	NA	NA	NA	NA	NA	NA	NA
SPAC13A11.02c	4377.53	5673.69	3081.37	0.543098	-0.880715	0.000424401	0.00301226	NA	NA	1	NA	NA	NA	NA
SPAC13A11.03	1065.67	1403.66	727.687	0.518421	-0.947804	1.20859e-05	0.000144004	NA	NA	1	1	NA	NA	NA
SPAC13A11.04c	478.325	382.591	574.059	1.50045	0.585395	0.0125919	0.0467201	NA	NA	1	NA	NA	NA	NA
SPAC13A11.05	1573.36	1431.46	1715.27	1.19827	0.260951	0.21534	0.393808	NA	NA	NA	NA	NA	NA	NA
SPAC13A11.06	53.2924	56.1944	50.3904	0.896716	-0.157277	0.799563	0.915861	NA	NA	NA	NA	NA	NA	NA
SPAC13C5.01c	1667.45	1717.41	1617.49	0.941822	-0.0864743	0.683682	0.834751	NA	NA	NA	NA	NA	NA	NA
SPAC13C5.02	765.338	788.056	742.619	0.942343	-0.0856758	0.719723	0.861594	NA	NA	NA	NA	NA	NA	NA
SPAC13C5.03	147.982	163.799	132.164	0.806866	-0.309599	0.336442	0.537119	NA	NA	NA	NA	NA	NA	NA
SPAC13C5.04	454.282	168.762	739.802	4.38371	2.13215	0.070903	0.175032	NA	NA	NA	NA	NA	NA	NA
SPAC13C5.05c	550.235	461.025	639.444	1.387	0.471971	0.0498062	0.134695	NA	NA	NA	NA	NA	NA	NA
SPAC13C5.06c	111.676	111.211	112.141	1.00836	0.0120037	0.93824	0.991947	NA	NA	NA	NA	NA	NA	NA
SPAC13C5.07	1656.62	1855.72	1457.51	0.785414	-0.348475	0.242142	0.427354	NA	NA	NA	NA	NA	NA	NA
SPAC13D1.01c	0	0	0	NA	NA	NA	NA	NA	NA	NA	NA	NA	NA	NA
SPAC13D6.01	128.14	93.1539	163.127	1.75115	0.808305	0.195893	0.367801	NA	NA	NA	NA	NA	NA	NA
SPAC13D6.02c	3365.97	4841.3	1890.65	0.390525	-1.35651	1.73217e-11	8.21368e-10	NA	1	1	NA	NA	1	NA
SPAC13D6.03c	284.023	315.414	252.632	0.800952	-0.320211	0.239485	0.424271	NA	NA	NA	NA	NA	NA	NA
SPAC13D6.04c	367.436	312.181	422.691	1.354	0.437223	0.097487	0.221775	NA	NA	NA	NA	NA	NA	NA
SPAC13D6.05	901.724	794.262	1009.19	1.27059	0.345503	0.101067	0.227827	NA	NA	NA	NA	NA	NA	NA
SPAC13F5.01c	617.801	695.486	540.117	0.776604	-0.364749	0.0956178	0.218714	NA	NA	NA	NA	NA	NA	NA
SPAC13F5.02c	1135.02	965.55	1304.5	1.35104	0.434071	0.0506926	0.136395	NA	NA	NA	NA	NA	NA	NA
SPAC13F5.03c	26540.2	518.219	52562.1	101.428	6.66432	1.49246e-07	3.06092e-06	1	NA	1	NA	NA	NA	NA
SPAC13F5.04c	239.756	133.874	345.637	2.5818	1.36838	0.0257043	0.0811804	NA	NA	NA	NA	NA	NA	NA
SPAC13F5.05	482.359	324.471	640.246	1.9732	0.980537	5.73312e-05	0.000551535	NA	NA	1	NA	NA	NA	NA
SPAC13F5.06c	584.766	518.349	651.183	1.25626	0.329138	0.173112	0.336559	NA	NA	NA	NA	NA	NA	NA
SPAC13F5.07c	168.452	39.2743	297.629	7.57822	2.92186	0.00885016	0.0354324	1	NA	1	NA	NA	NA	NA
SPAC13G6.01c	1168.24	1606.75	729.725	0.454162	-1.13872	9.39833e-08	2.0535e-06	NA	1	1	NA	NA	NA	NA
SPAC13G6.02c	6464.55	8579.28	4349.81	0.507013	-0.979904	0.000124679	0.00105788	NA	NA	1	NA	NA	NA	NA
SPAC13G6.03	757.52	706.143	808.897	1.14551	0.195994	0.410851	0.609891	NA	NA	NA	NA	NA	NA	NA
SPAC13G6.04	145.967	145.393	146.541	1.0079	0.0113488	0.995391	1	NA	NA	NA	NA	NA	NA	NA
SPAC13G6.05c	652.869	499.463	806.275	1.61428	0.690893	0.0424787	0.119133	NA	NA	NA	NA	NA	NA	NA
SPAC13G6.06c	3139.74	2887.82	3391.66	1.17447	0.23201	0.239743	0.42461	NA	NA	NA	NA	NA	NA	NA
SPAC13G6.07c	9516.18	12955.6	6076.71	0.46904	-1.09222	2.73778e-08	6.68058e-07	NA	1	1	NA	NA	NA	NA
SPAC13G6.08	29.9169	41.2482	18.5855	0.450579	-1.15015	0.0546757	0.144777	NA	NA	NA	NA	NA	NA	NA
SPAC13G6.09	636.472	751.438	521.507	0.694012	-0.526967	0.0202973	0.0677184	NA	NA	NA	NA	NA	NA	NA
SPAC13G6.10c	16855.5	18367	15344.1	0.835414	-0.259436	0.318509	0.517762	NA	NA	NA	NA	NA	NA	NA
SPAC13G6.11c	732.913	779.023	686.803	0.88162	-0.18177	0.426094	0.623793	NA	NA	NA	NA	NA	NA	NA
SPAC13G6.12c	153.479	158.211	148.747	0.940186	-0.0889814	0.794008	0.91304	NA	NA	NA	NA	NA	NA	NA
SPAC13G6.13	0	0	0	NA	NA	NA	NA	NA	NA	NA	NA	NA	NA	NA
SPAC13G6.14	479.669	420.07	539.268	1.28376	0.360372	0.12861	0.271001	NA	NA	NA	1	NA	NA	NA
SPAC13G6.15c	299.655	335.827	263.483	0.784581	-0.350005	0.168352	0.329439	NA	NA	NA	NA	NA	NA	NA
SPAC13G7.01c	960.148	1103.93	816.362	0.739503	-0.435372	0.0518253	0.138583	NA	NA	NA	NA	NA	NA	NA
SPAC13G7.02c	5628.67	2056.53	9200.82	4.47395	2.16155	0.00430152	0.0199583	1	NA	1	NA	NA	NA	NA
SPAC13G7.03	253.624	203.39	303.857	1.49396	0.579143	0.0382135	0.11008	NA	NA	NA	NA	NA	NA	NA
SPAC13G7.04c	1169.79	1113.6	1225.98	1.10092	0.138705	0.543759	0.728134	NA	NA	NA	NA	NA	NA	NA
SPAC13G7.05	329.232	359.14	299.324	0.833447	-0.262837	0.300841	0.498539	NA	NA	NA	NA	NA	NA	NA
SPAC13G7.06	921.85	1345.24	498.457	0.370533	-1.43233	1.28124e-10	4.95165e-09	NA	1	1	NA	NA	NA	NA
SPAC13G7.07	213.274	152.151	274.398	1.80346	0.85077	0.00468738	0.0213162	NA	NA	1	NA	NA	1	NA
SPAC13G7.08c	565.512	723.553	407.471	0.563153	-0.828402	0.00946154	0.0371025	NA	NA	1	NA	NA	NA	NA
SPAC13G7.09c	110.468	118.619	102.317	0.862565	-0.213296	0.545017	0.729088	NA	NA	NA	NA	NA	NA	NA
SPAC13G7.10	1247.49	1194.77	1300.22	1.08826	0.122021	0.594055	0.767409	NA	NA	NA	NA	NA	NA	NA
SPAC13G7.11	364.53	366.718	362.341	0.988065	-0.0173216	0.902578	0.973172	NA	NA	NA	1	NA	NA	NA
SPAC13G7.12c	737.281	922.905	551.657	0.597739	-0.742412	0.00106473	0.00650117	NA	NA	1	NA	NA	NA	NA
SPAC13G7.13c	562.543	429.063	696.024	1.6222	0.697948	0.00220087	0.0117815	NA	NA	1	NA	NA	1	NA
SPAC140.01	2742.33	2500.14	2984.52	1.19374	0.255492	0.548653	0.732202	NA	NA	NA	NA	NA	NA	NA
SPAC140.02	6218.33	9457.53	2979.13	0.315001	-1.66657	9.4943e-06	0.000117991	NA	1	1	NA	NA	1	NA
SPAC140.03	373.915	385.58	362.25	0.939495	-0.0900431	0.71525	0.858965	NA	NA	NA	NA	NA	NA	NA
SPAC140.04	218.918	173.49	264.347	1.5237	0.60758	0.0359487	0.105141	NA	NA	NA	NA	NA	NA	NA
SPAC1420.01c	2826.18	2355.55	3296.82	1.3996	0.485012	0.0155652	0.0549687	NA	NA	NA	NA	NA	NA	NA
SPAC1420.02c	3228.03	3614.41	2841.65	0.7862	-0.347032	0.0980127	0.222517	NA	NA	NA	NA	NA	NA	NA
SPAC1420.03	1.99265	1.97385	2.01146	1.01905	0.0272311	1	1	NA	NA	NA	NA	NA	NA	NA
SPAC1420.04c	1.57103	2.13633	1.00573	0.470775	-1.08689	0.822071	0.928754	NA	NA	NA	NA	NA	NA	NA
SPAC144.01	182.142	225.436	138.848	0.615909	-0.699212	0.0170637	0.0591743	NA	NA	NA	NA	NA	NA	NA
SPAC144.02	356.36	357.792	354.929	0.991999	-0.0115899	0.998031	1	NA	NA	NA	NA	NA	NA	NA
SPAC144.03	1744.96	2103.57	1386.34	0.659044	-0.601554	0.00399863	0.0188539	NA	NA	1	NA	NA	NA	NA
SPAC144.04c	3749.82	3652.68	3846.96	1.05319	0.074763	0.693624	0.843501	NA	NA	NA	NA	NA	NA	NA
SPAC144.05	1065.85	1013.26	1118.44	1.10381	0.142494	0.482048	0.675817	NA	NA	NA	NA	NA	NA	NA
SPAC144.06	1226.98	1225.4	1228.56	1.00258	0.00372383	0.989396	1	NA	NA	NA	NA	NA	NA	NA
SPAC144.07c	402.504	409.916	395.092	0.963838	-0.0531381	0.802756	0.917475	NA	NA	NA	NA	NA	NA	NA
SPAC144.08	460.569	420.233	500.905	1.19197	0.25335	0.288219	0.485239	NA	NA	NA	NA	NA	NA	NA
SPAC144.09c	315.578	380.268	250.888	0.659766	-0.599975	0.0287581	0.0886855	NA	NA	NA	NA	NA	NA	NA
SPAC144.10c	931.925	723.138	1140.71	1.57745	0.657592	0.00211564	0.0114166	NA	NA	1	NA	NA	NA	NA
SPAC144.11	2926.74	3809.82	2043.67	0.536423	-0.898557	0.000263475	0.0019905	NA	NA	1	NA	NA	1	NA
SPAC144.12	1625.67	1054.55	2196.8	2.08317	1.05878	1.88267e-07	3.80288e-06	1	NA	1	NA	NA	NA	NA
SPAC144.13c	399.952	249.375	550.53	2.20764	1.14251	4.92716e-06	6.75062e-05	1	NA	1	NA	NA	NA	NA
SPAC144.14	352.76	285.586	419.933	1.47043	0.556235	0.0416307	0.117371	NA	NA	NA	NA	NA	NA	NA
SPAC144.15c	904.453	1007.76	801.142	0.794969	-0.33103	0.119456	0.256235	NA	NA	NA	NA	NA	NA	NA
SPAC144.16	508.026	469.872	546.18	1.1624	0.217109	0.378036	0.579448	NA	NA	NA	NA	NA	NA	NA
SPAC144.17c	469.788	398.057	541.519	1.36041	0.444037	0.0626557	0.160535	NA	NA	NA	NA	NA	NA	NA
SPAC144.18	1267.29	1319.57	1215.01	0.92076	-0.119103	0.63098	0.79319	NA	NA	NA	NA	NA	NA	NA
SPAC1486.01	1738.71	1022.72	2454.71	2.40018	1.26314	0.000550121	0.00376855	1	NA	1	1	NA	NA	NA
SPAC1486.02c	688.603	695.755	681.452	0.979443	-0.0299668	0.898188	0.973172	NA	NA	NA	NA	NA	NA	NA
SPAC1486.03c	875.3	908.495	842.104	0.926923	-0.109479	0.625453	0.789129	NA	NA	NA	NA	NA	1	NA
SPAC1486.04c	2976.99	3124.73	2829.24	0.905434	-0.143319	0.467068	0.66457	NA	NA	NA	NA	NA	NA	NA
SPAC1486.05	6843.11	6773.54	6912.67	1.02054	0.0293331	0.834533	0.936145	NA	NA	NA	NA	NA	NA	NA
SPAC1486.06	730.451	902.216	558.686	0.619238	-0.691434	0.0024742	0.0129339	NA	NA	1	NA	NA	NA	NA
SPAC1486.07c	397.333	429.777	364.889	0.84902	-0.23613	0.336827	0.537605	NA	NA	NA	NA	NA	NA	NA
SPAC1486.08	195.505	230.976	160.035	0.692862	-0.529359	0.0780806	0.188057	NA	NA	NA	NA	NA	NA	NA
SPAC1486.09	832.151	1226.2	438.103	0.357285	-1.48485	4.17748e-11	1.83754e-09	NA	1	1	NA	NA	1	NA
SPAC1486.10	1024.3	1217.08	831.532	0.683221	-0.549577	0.00924778	0.0365214	NA	NA	1	NA	NA	NA	1
SPAC1486.11	133.288	105.655	160.92	1.52307	0.606985	0.0908297	0.210081	NA	NA	NA	NA	NA	NA	NA
SPAC14C4.01c	698.003	437.006	959	2.19448	1.13388	0.0392518	0.112297	NA	NA	NA	NA	NA	NA	NA
SPAC14C4.02c	946.054	1068.05	824.055	0.771549	-0.374171	0.0816434	0.194234	NA	NA	NA	NA	NA	NA	NA
SPAC14C4.03	27.0834	20.5268	33.6399	1.63883	0.712668	0.245345	0.431463	NA	NA	NA	NA	NA	NA	NA
SPAC14C4.04	678.729	712.001	645.457	0.90654	-0.141558	0.543935	0.728224	NA	NA	NA	NA	NA	NA	NA
SPAC14C4.05c	908.213	774.564	1041.86	1.3451	0.427709	0.0441039	0.122611	NA	NA	NA	NA	NA	NA	NA
SPAC14C4.06c	552.219	556.406	548.032	0.984951	-0.0218767	0.980084	1	NA	NA	NA	NA	1	1	NA
SPAC14C4.07	1285.42	942.375	1628.47	1.72805	0.789145	0.00440348	0.0203046	NA	NA	1	NA	NA	NA	NA
SPAC14C4.08	128.272	106.475	150.069	1.40942	0.495102	0.172274	0.335418	NA	NA	NA	NA	NA	NA	NA
SPAC14C4.09	1460.65	1355.91	1565.4	1.1545	0.207271	0.335097	0.535739	NA	NA	NA	NA	NA	NA	NA
SPAC14C4.10c	172.652	131.6	213.704	1.62389	0.699457	0.0260059	0.0819396	NA	NA	NA	NA	NA	NA	NA
SPAC14C4.11	3530.12	4025.28	3034.95	0.753973	-0.407415	0.0471864	0.12935	NA	NA	NA	NA	NA	NA	NA
SPAC14C4.12c	390.67	460.101	321.24	0.698194	-0.518299	0.123635	0.263005	NA	NA	NA	NA	NA	NA	NA
SPAC14C4.13	210.113	286.488	133.737	0.466816	-1.09907	0.000210692	0.00166315	NA	1	1	NA	NA	NA	NA
SPAC14C4.14	9046.22	5257.54	12834.9	2.44124	1.28761	1.45693e-05	0.000169116	1	NA	1	NA	NA	NA	NA
SPAC14C4.15c	548.622	638.18	459.063	0.719332	-0.475271	0.067074	0.167961	NA	NA	NA	NA	NA	NA	NA
SPAC14C4.16	89.3037	103.162	75.446	0.731338	-0.451389	0.255131	0.445148	NA	NA	NA	NA	NA	NA	NA
SPAC1527.01	1414.45	1484.88	1344.01	0.905128	-0.143806	0.52791	0.714928	NA	NA	NA	NA	NA	NA	NA
SPAC1527.02	217.818	195.162	240.474	1.23218	0.30121	0.288066	0.485239	NA	NA	NA	NA	NA	NA	NA
SPAC1527.03	916.443	1346.57	486.312	0.361148	-1.46934	4.32473e-11	1.88988e-09	NA	1	1	NA	NA	1	NA
SPAC1556.01c	1007.24	756.563	1257.92	1.66268	0.733514	0.000747194	0.00480822	NA	NA	1	NA	NA	NA	NA
SPAC1556.02c	8962.58	7049.89	10875.3	1.54262	0.62538	0.0167925	0.0584766	NA	NA	NA	NA	NA	NA	NA
SPAC1556.03	785.67	782.598	788.742	1.00785	0.0112828	0.936395	0.99057	NA	NA	NA	NA	NA	NA	NA
SPAC1556.04c	44.3568	33.3448	55.3688	1.6605	0.731614	0.153607	0.308275	NA	NA	NA	1	NA	NA	NA
SPAC1556.05c	738.781	938.275	539.288	0.574765	-0.798955	0.00063426	0.00421118	NA	NA	1	NA	NA	NA	NA
SPAC1556.06	239.907	250.528	229.285	0.915208	-0.127829	0.669093	0.822194	NA	NA	NA	NA	NA	NA	NA
SPAC1556.07	2149.63	2433.64	1865.62	0.766597	-0.38346	0.0849293	0.200084	NA	NA	NA	NA	NA	NA	NA
SPAC1556.08c	1607.39	1225.4	1989.38	1.62346	0.69907	0.000721182	0.00468439	NA	NA	1	NA	NA	NA	NA
SPAC1565.01	1606.4	1419.44	1793.35	1.26343	0.337343	0.481377	0.675302	NA	NA	NA	NA	NA	NA	NA
SPAC1565.02c	385.692	314.788	456.596	1.45049	0.536537	0.035136	0.103238	NA	NA	NA	NA	NA	NA	NA
SPAC1565.03	79.7397	53.0672	106.412	2.00524	1.00377	0.0160677	0.0564821	NA	NA	NA	NA	1	NA	NA
SPAC1565.04c	559.588	163.328	955.849	5.85234	2.54901	3.02877e-19	4.13272e-17	1	NA	1	NA	1	NA	NA
SPAC1565.05	1472.22	2135.4	809.037	0.378868	-1.40023	5.22048e-11	2.25188e-09	NA	1	1	NA	NA	1	NA
SPAC1565.06c	528.982	451.148	606.817	1.34505	0.427659	0.0755749	0.18341	NA	NA	NA	NA	NA	NA	NA
SPAC1565.07c	783.555	643.386	923.724	1.43572	0.521778	0.0222919	0.0726729	NA	NA	NA	NA	NA	NA	NA
SPAC1565.08	14880.3	14789.9	14970.7	1.01222	0.0175297	0.935513	0.99057	NA	NA	NA	NA	NA	NA	NA
SPAC15A10.01	911.554	836.014	987.093	1.18071	0.239659	0.253271	0.442479	NA	NA	NA	NA	NA	NA	NA
SPAC15A10.02	1532.03	1629.7	1434.37	0.880145	-0.184187	0.381881	0.583189	NA	NA	NA	NA	NA	NA	NA
SPAC15A10.03c	615.072	526.245	703.9	1.33759	0.419637	0.0787499	0.188988	NA	NA	NA	NA	NA	NA	NA
SPAC15A10.04c	1711.67	2496.59	926.743	0.371204	-1.42972	9.66246e-10	3.23016e-08	NA	1	1	NA	NA	NA	NA
SPAC15A10.05c	160.616	33.8402	287.392	8.49262	3.08621	0.0139069	0.0503694	NA	NA	NA	NA	NA	NA	NA
SPAC15A10.06	501.455	400.974	601.936	1.50119	0.586104	0.0114157	0.0432929	NA	NA	1	NA	NA	NA	NA
SPAC15A10.07	272.515	283.921	261.11	0.919657	-0.120833	0.597172	0.769305	NA	NA	NA	NA	NA	NA	NA
SPAC15A10.08	817.854	917.576	718.132	0.782641	-0.353578	0.0998814	0.225839	NA	NA	NA	NA	NA	NA	NA
SPAC15A10.09c	567.914	452.286	683.542	1.51131	0.595795	0.0108705	0.0418422	NA	NA	1	NA	NA	NA	NA
SPAC15A10.10	319.62	271.574	367.666	1.35383	0.437048	0.0963589	0.219912	NA	NA	NA	NA	NA	NA	NA
SPAC15A10.11	4867.7	4540.85	5194.56	1.14396	0.194038	0.308767	0.507352	NA	NA	NA	NA	NA	NA	NA
SPAC15A10.12c	224.43	217.825	231.035	1.06064	0.0849406	0.739812	0.873997	NA	NA	NA	NA	NA	NA	NA
SPAC15A10.13	821.655	718.215	925.094	1.28805	0.365184	0.0884945	0.20623	NA	NA	NA	NA	NA	NA	NA
SPAC15A10.15	957.393	989.773	925.013	0.934571	-0.0976241	0.679949	0.831865	NA	NA	NA	1	NA	NA	NA
SPAC15A10.16	2373.67	2031.2	2716.14	1.33721	0.419225	0.036893	0.1072	NA	NA	NA	NA	NA	NA	NA
SPAC15A10.17	284.844	270.112	299.576	1.10908	0.149366	0.633038	0.795133	NA	NA	NA	NA	NA	NA	NA
SPAC15E1.02c	808.761	49.623	1567.9	31.5962	4.98168	0.00734704	0.0307399	1	NA	1	NA	NA	NA	NA
SPAC15E1.03	5164.04	6714.84	3613.23	0.538097	-0.894061	7.1025e-06	9.16744e-05	NA	NA	1	NA	NA	NA	NA
SPAC15E1.04	1637.8	1288.51	1987.09	1.54216	0.62495	0.00260725	0.0135028	NA	NA	1	NA	NA	NA	NA
SPAC15E1.05c	430.007	404.319	455.695	1.12707	0.172574	0.509027	0.69884	NA	NA	NA	NA	NA	NA	NA
SPAC15E1.06	324.671	333.147	316.195	0.949116	-0.0753441	0.804815	0.919043	NA	NA	NA	NA	NA	NA	NA
SPAC15E1.07c	2.29749	1.64086	2.95411	1.80035	0.848275	0.800386	0.916332	NA	NA	NA	NA	NA	NA	NA
SPAC15E1.08	333.017	423.197	242.836	0.573813	-0.801348	0.00189519	0.0104635	NA	NA	1	NA	NA	NA	NA
SPAC15E1.09	411.805	439.305	384.304	0.8748	-0.192975	0.426411	0.624121	NA	NA	NA	NA	NA	NA	NA
SPAC15E1.10	200.305	131.437	269.173	2.04792	1.03416	0.00897963	0.0358221	1	NA	1	NA	NA	NA	NA
SPAC15F9.01c	4.84152	6.2465	3.43653	0.550153	-0.862096	0.580008	0.759634	NA	NA	NA	NA	NA	NA	NA
SPAC15F9.02	841.19	987.677	694.704	0.703371	-0.507642	0.0214045	0.0706718	NA	NA	NA	1	NA	NA	NA
SPAC15F9.03c	1008.4	1120.78	896.029	0.79947	-0.322884	0.132019	0.27575	NA	NA	NA	NA	NA	NA	NA
SPAC16.01	417.541	407.431	427.651	1.04963	0.0698786	0.780777	0.903943	NA	NA	NA	NA	NA	NA	NA
SPAC16.02c	2091.49	2320.61	1862.36	0.80253	-0.317372	0.122075	0.260583	NA	NA	NA	NA	NA	1	NA
SPAC16.03c	538.699	652.476	424.921	0.651243	-0.618731	0.0108017	0.0416255	NA	NA	1	NA	NA	NA	NA
SPAC16.04	985.208	1031.82	938.598	0.909655	-0.136609	0.561556	0.743379	NA	NA	NA	NA	NA	NA	NA
SPAC16.05c	1366.67	1480.36	1252.98	0.846404	-0.240582	0.270258	0.464272	NA	NA	NA	NA	NA	NA	1
SPAC1610.01	125.728	120.114	131.342	1.09348	0.128922	0.829398	0.933247	NA	NA	NA	NA	NA	NA	NA
SPAC1610.02c	185.115	180.727	189.503	1.04856	0.0684092	0.859398	0.951023	NA	NA	NA	1	NA	NA	NA
SPAC1610.03c	56.483	22.6711	90.2949	3.98281	1.99379	0.0283169	0.0877327	NA	NA	NA	NA	NA	1	NA
SPAC1610.04	472.807	341.903	603.711	1.76574	0.820272	0.000815268	0.00515694	NA	NA	1	NA	NA	NA	NA
SPAC1635.01	6549.4	4180.08	8918.72	2.13363	1.09331	0.000348817	0.00254465	1	NA	1	NA	NA	NA	NA
SPAC1639.01c	2748.55	2807.48	2689.62	0.958016	-0.0618786	0.755828	0.884601	NA	NA	NA	NA	NA	NA	NA
SPAC1639.02c	1242.86	1190.57	1295.16	1.08784	0.121472	0.558902	0.741549	NA	NA	NA	NA	NA	NA	NA
SPAC167.01	511.61	547.203	476.018	0.869912	-0.201059	0.41968	0.617649	NA	NA	NA	NA	NA	NA	NA
SPAC167.02	423.462	401.501	445.423	1.10939	0.149773	0.534434	0.720263	NA	NA	NA	NA	NA	NA	NA
SPAC167.03c	828.427	831.44	825.414	0.992751	-0.0104958	0.97628	1	NA	NA	NA	NA	NA	NA	NA
SPAC167.04	644.14	622.47	665.811	1.06963	0.0971096	0.665329	0.818772	NA	NA	NA	NA	NA	NA	NA
SPAC167.05	1463.01	920.183	2005.83	2.17982	1.12421	0.00821825	0.0335958	1	NA	1	NA	NA	NA	NA
SPAC167.06c	297.307	107.296	487.318	4.54182	2.18327	0.00392714	0.0185692	1	NA	1	NA	NA	NA	NA
SPAC167.07c	564.176	502.282	626.07	1.24645	0.317828	0.201633	0.375624	NA	NA	NA	NA	NA	NA	NA
SPAC167.08	0	0	0	NA	NA	NA	NA	NA	NA	NA	NA	NA	NA	NA
SPAC167.09	175.423	136.011	214.836	1.57955	0.659513	0.0277089	0.0861283	NA	NA	NA	NA	NA	NA	NA
SPAC1687.01	303.466	429.891	177.041	0.411827	-1.27989	2.07276e-06	3.17855e-05	NA	1	1	NA	NA	NA	NA
SPAC1687.02	420.446	334.34	506.551	1.51508	0.599391	0.0740769	0.180627	NA	NA	NA	NA	NA	NA	NA
SPAC1687.03c	466.906	620.837	312.975	0.504119	-0.988164	4.58405e-05	0.000454732	NA	NA	1	NA	NA	NA	NA
SPAC1687.04	368.187	289.469	446.905	1.54388	0.626556	0.0131836	0.0484452	NA	NA	1	NA	NA	NA	NA
SPAC1687.05	1324.27	1347.18	1301.36	0.965985	-0.0499267	0.803705	0.918245	NA	NA	NA	NA	NA	NA	NA
SPAC1687.06c	6095.39	8416.65	3774.13	0.448413	-1.1571	2.95874e-05	0.000310552	NA	1	1	NA	NA	NA	NA
SPAC1687.07	114.019	72.944	155.094	2.1262	1.08828	0.0183073	0.0624505	NA	NA	NA	NA	NA	NA	NA
SPAC1687.08	37.917	25.6199	50.214	1.95996	0.970827	0.0734042	0.17951	NA	NA	NA	NA	NA	NA	NA
SPAC1687.09	2335.92	1847.21	2824.62	1.52912	0.612706	0.00230849	0.0122542	NA	NA	1	NA	NA	NA	NA
SPAC1687.10	333.501	308.217	358.786	1.16407	0.219177	0.434084	0.632377	NA	NA	NA	NA	NA	NA	NA
SPAC1687.11	2488.22	3489.45	1486.99	0.42614	-1.2306	2.27327e-09	7.13571e-08	NA	1	1	NA	NA	NA	NA
SPAC1687.12c	1121.94	959.897	1283.98	1.33763	0.419676	0.0472761	0.129438	NA	NA	NA	NA	NA	NA	NA
SPAC1687.13c	248.453	248.733	248.173	0.997751	-0.00324867	0.997139	1	NA	NA	NA	NA	NA	NA	NA
SPAC1687.14c	241.277	181.223	301.332	1.66277	0.73359	0.0106119	0.0409648	NA	NA	1	NA	NA	NA	NA
SPAC1687.15	1618.17	1318.77	1917.58	1.45407	0.540094	0.0098834	0.0384987	NA	NA	1	1	NA	NA	NA
SPAC1687.16c	870.907	1101.75	640.066	0.580956	-0.7835	0.000323197	0.0023694	NA	NA	1	NA	NA	NA	NA
SPAC1687.17c	350.06	351.276	348.844	0.993076	-0.0100238	0.93068	0.988078	NA	NA	NA	NA	NA	NA	NA
SPAC1687.18c	755.031	769.649	740.412	0.962013	-0.0558723	0.82241	0.92898	NA	NA	NA	NA	NA	NA	NA
SPAC1687.19c	531.481	631.609	431.352	0.682943	-0.550164	0.0248431	0.078983	NA	NA	NA	NA	NA	NA	NA
SPAC1687.20c	205.293	202.895	207.692	1.02364	0.0337111	0.922473	0.983132	NA	NA	NA	NA	NA	NA	NA
SPAC1687.21	814.131	926.837	701.425	0.756794	-0.402027	0.078631	0.188907	NA	NA	NA	NA	NA	NA	NA
SPAC1687.22c	1957.24	1192.51	2721.97	2.28255	1.19065	0.0133339	0.0489032	1	NA	1	NA	NA	1	NA
SPAC1687.23c	0	0	0	NA	NA	NA	NA	NA	NA	NA	NA	NA	NA	NA
SPAC16A10.01	633.134	237.734	1028.53	4.3264	2.11317	0.0100029	0.0388833	1	NA	1	NA	NA	NA	NA
SPAC16A10.02	622.754	613.242	632.266	1.03102	0.0440741	0.817926	0.927143	NA	NA	NA	NA	NA	NA	NA
SPAC16A10.03c	623.312	618.237	628.388	1.01642	0.0234948	0.950148	0.997004	NA	NA	NA	NA	NA	NA	NA
SPAC16A10.04	446.373	381.843	510.903	1.33799	0.42007	0.100851	0.227646	NA	NA	NA	NA	NA	NA	NA
SPAC16A10.05c	59.4683	72.944	45.9925	0.630518	-0.665391	0.148243	0.300014	NA	NA	NA	NA	NA	NA	NA
SPAC16A10.06c	193.011	165.237	220.785	1.33617	0.418102	0.129405	0.272076	NA	NA	NA	NA	NA	NA	NA
SPAC16A10.07c	631.506	579.183	683.829	1.18068	0.239616	0.24639	0.432719	NA	NA	NA	NA	NA	NA	NA
SPAC16A10.08c	133.171	105.964	160.378	1.51352	0.597905	0.0772071	0.186693	NA	NA	NA	NA	NA	NA	NA
SPAC16C9.01c	553.618	425.326	681.911	1.60327	0.681016	0.0104592	0.040469	NA	NA	1	NA	NA	NA	NA
SPAC16C9.02c	944.832	1487.86	401.8	0.270051	-1.8887	2.98656e-17	3.22067e-15	NA	1	1	NA	NA	NA	NA
SPAC16C9.03	1507.16	2115.48	898.834	0.424883	-1.23486	4.48826e-09	1.30472e-07	NA	1	1	NA	NA	NA	NA
SPAC16C9.04c	1116.1	971.423	1260.77	1.29786	0.376137	0.0778962	0.187884	NA	NA	NA	NA	NA	1	NA
SPAC16C9.05	624.88	637.968	611.792	0.958971	-0.0604407	0.740444	0.874357	NA	NA	NA	NA	NA	NA	NA
SPAC16C9.06c	1329.15	1707.87	950.435	0.556505	-0.845534	6.44395e-05	0.000605366	NA	NA	1	NA	NA	NA	NA
SPAC16C9.07	1190	1137.72	1242.27	1.0919	0.126844	0.582175	0.761357	NA	NA	NA	NA	NA	NA	NA
SPAC16E8.01	5365.26	4383.64	6346.89	1.44786	0.53392	0.0167594	0.0583917	NA	NA	NA	NA	NA	NA	NA
SPAC16E8.02	236.676	128.627	344.726	2.68004	1.42226	0.0187473	0.0635297	NA	NA	NA	NA	NA	NA	NA
SPAC16E8.03	132.86	58.8102	206.909	3.51826	1.81486	0.00350096	0.017036	1	NA	1	NA	NA	NA	NA
SPAC16E8.04c	591.931	760.047	423.815	0.557616	-0.842655	0.000213505	0.00167546	NA	NA	1	NA	NA	NA	NA
SPAC16E8.05c	23.2031	16.7576	29.6486	1.76926	0.823144	0.26213	0.453103	NA	NA	NA	NA	NA	NA	NA
SPAC16E8.06c	903.887	1280.88	526.898	0.411357	-1.28154	8.30534e-09	2.20355e-07	NA	1	1	NA	NA	1	NA
SPAC16E8.07c	3761.63	3790.21	3733.06	0.984921	-0.0219197	0.93989	0.992928	NA	NA	NA	NA	NA	NA	NA
SPAC16E8.08	365.327	333.064	397.59	1.19373	0.255479	0.382582	0.583606	NA	NA	NA	NA	NA	NA	NA
SPAC16E8.09	835.155	732.528	937.783	1.2802	0.356372	0.0975301	0.221798	NA	NA	NA	NA	NA	NA	NA
SPAC16E8.10c	582.506	579.117	585.895	1.0117	0.0167863	0.957246	1	NA	NA	NA	NA	NA	1	NA
SPAC16E8.11c	479.738	565.593	393.882	0.696406	-0.522	0.0329839	0.0981007	NA	NA	NA	NA	NA	NA	NA
SPAC16E8.12c	361.121	370.317	351.924	0.950334	-0.0734941	0.760258	0.888496	NA	NA	NA	NA	NA	NA	NA
SPAC16E8.13	416.825	370.796	462.855	1.24827	0.319933	0.198501	0.371446	NA	NA	NA	NA	NA	NA	NA
SPAC16E8.14c	243.549	269.259	217.838	0.809025	-0.305743	0.272851	0.467165	NA	NA	NA	NA	NA	NA	NA
SPAC16E8.15	2541.37	3185.47	1897.27	0.595602	-0.74758	0.000257512	0.00195207	NA	NA	1	NA	NA	1	NA
SPAC16E8.16	668.435	630.754	706.115	1.11948	0.162826	0.509909	0.699639	NA	NA	NA	NA	NA	NA	NA
SPAC16E8.17c	862.948	691.767	1034.13	1.49491	0.580058	0.00783591	0.0323002	NA	NA	1	NA	NA	NA	NA
SPAC16E8.18	115.406	135.052	95.7591	0.709054	-0.496033	0.148345	0.300101	NA	NA	NA	NA	NA	NA	NA
SPAC16E8.18c	203.304	166.098	240.509	1.448	0.534058	0.0762755	0.184574	NA	NA	NA	NA	NA	NA	NA
SPAC1705.02	114.983	125.67	104.297	0.829924	-0.268948	0.472872	0.667793	NA	NA	NA	NA	NA	NA	NA
SPAC1705.03c	14819.2	15215.2	14423.2	0.947948	-0.0771196	0.678013	0.830103	NA	NA	NA	NA	NA	NA	NA
SPAC1751.01c	518.298	225.859	810.737	3.58957	1.84381	8.19689e-13	4.98222e-11	1	NA	1	NA	NA	NA	NA
SPAC1751.02c	465.366	432.254	498.478	1.15321	0.20565	0.41687	0.614732	NA	NA	NA	NA	NA	1	NA
SPAC1751.03	4693.97	5567.62	3820.32	0.686169	-0.543365	0.00645101	0.0277373	NA	NA	1	NA	NA	1	NA
SPAC1751.04	299.418	233.267	365.57	1.56718	0.648167	0.0135215	0.0494284	NA	NA	1	NA	NA	NA	NA
SPAC1782.01	2175.95	1936.05	2415.86	1.24783	0.319421	0.109032	0.241387	NA	NA	NA	NA	NA	NA	NA
SPAC1782.02c	375.6	407.26	343.939	0.84452	-0.243797	0.328409	0.528713	NA	NA	NA	NA	NA	NA	NA
SPAC1782.03	211.438	216.517	206.358	0.953078	-0.0693338	0.859985	0.951334	NA	NA	NA	NA	NA	NA	NA
SPAC1782.04	405.234	425.496	384.972	0.90476	-0.144392	0.565761	0.746734	NA	NA	NA	NA	NA	NA	NA
SPAC1782.05	214.921	189.403	240.439	1.26946	0.344214	0.211581	0.388848	NA	NA	NA	NA	NA	NA	NA
SPAC1782.06c	1021.84	772.582	1271.09	1.64525	0.718304	0.00072098	0.00468439	NA	NA	1	NA	NA	NA	NA
SPAC1782.07	758.122	535.205	981.039	1.83302	0.874219	0.00200601	0.0109576	NA	NA	1	NA	NA	NA	NA
SPAC1782.08c	668.483	715.876	621.089	0.867593	-0.204909	0.415829	0.614013	NA	NA	NA	NA	1	NA	NA
SPAC1782.09c	839.647	783.946	895.348	1.14211	0.191695	0.372691	0.575742	NA	NA	NA	NA	NA	NA	NA
SPAC1782.10c	1077.26	1518.25	636.277	0.419085	-1.25469	9.15138e-09	2.39946e-07	NA	1	1	NA	NA	1	NA
SPAC1782.11	1511.48	2188.91	834.05	0.381035	-1.39201	6.96212e-07	1.24462e-05	NA	1	1	NA	NA	NA	NA
SPAC1782.12c	298.017	166.593	429.441	2.57778	1.36613	0.00731476	0.0306624	1	NA	1	NA	NA	NA	NA
SPAC1783.01	1039.96	871.746	1208.18	1.38594	0.470861	0.031105	0.0941694	NA	NA	NA	NA	NA	NA	NA
SPAC1783.02c	404.24	384.28	424.199	1.10388	0.142583	0.595823	0.768317	NA	NA	NA	NA	NA	NA	NA
SPAC1783.03	212.813	274.986	150.64	0.547808	-0.868259	0.0031583	0.0156999	NA	NA	1	NA	NA	NA	NA
SPAC1783.04c	757.877	756.174	759.581	1.00451	0.00648635	0.954744	0.999752	NA	NA	NA	NA	NA	NA	NA
SPAC1783.05	3351.11	4000.68	2701.53	0.675268	-0.566468	0.00518005	0.02312	NA	NA	1	NA	NA	NA	NA
SPAC1783.06c	108.94	100.708	117.173	1.16349	0.218454	0.560984	0.743163	NA	NA	NA	NA	NA	NA	NA
SPAC1783.07c	2182.17	1949.47	2414.87	1.23873	0.308866	0.132011	0.27575	NA	NA	NA	NA	NA	NA	1
SPAC1783.08c	3291.02	4673.63	1908.41	0.408335	-1.29217	3.40144e-08	7.97967e-07	NA	1	1	NA	NA	NA	NA
SPAC1786.01c	3044.3	2710.12	3378.48	1.24662	0.318018	0.118827	0.255295	NA	NA	NA	NA	NA	NA	NA
SPAC1786.02	4281.32	6714.14	1848.5	0.275314	-1.86085	2.49148e-11	1.1332e-09	NA	1	1	NA	NA	NA	NA
SPAC1786.03	565.69	612.632	518.748	0.846752	-0.239988	0.288982	0.485949	NA	NA	NA	NA	NA	NA	NA
SPAC1786.04	1.32754	2.29881	0.356268	0.154979	-2.68985	0.58787	0.765222	NA	NA	NA	NA	NA	NA	NA
SPAC17A2.01	96.6031	111.861	81.3448	0.727194	-0.459588	0.242185	0.427354	NA	NA	NA	NA	NA	NA	NA
SPAC17A2.02c	1924.44	1996.69	1852.18	0.927623	-0.108389	0.591033	0.767012	NA	NA	NA	NA	NA	NA	NA
SPAC17A2.03c	1165.15	1205.69	1124.6	0.932746	-0.100443	0.641984	0.801252	NA	NA	NA	NA	NA	NA	NA
SPAC17A2.04c	376.362	471.188	281.536	0.597504	-0.742981	0.00287814	0.0145782	NA	NA	1	NA	NA	NA	NA
SPAC17A2.05	939.346	899.715	978.977	1.0881	0.121807	0.542465	0.727247	NA	NA	NA	NA	NA	NA	NA
SPAC17A2.06c	1170.97	1075.58	1266.36	1.17737	0.235569	0.260468	0.450843	NA	NA	NA	NA	NA	NA	NA
SPAC17A2.07c	99.9427	80.011	119.874	1.49823	0.583255	0.125436	0.265652	NA	NA	NA	NA	NA	NA	NA
SPAC17A2.08c	441.579	491.163	391.996	0.798098	-0.325362	0.215595	0.394166	NA	NA	NA	NA	NA	NA	NA
SPAC17A2.09c	2321.68	1760.12	2883.24	1.63809	0.712018	0.00775959	0.0320251	NA	NA	1	1	NA	1	NA
SPAC17A2.10c	340.015	247.481	432.55	1.74781	0.805549	0.0159353	0.0561938	NA	NA	NA	1	NA	NA	NA
SPAC17A2.11	126.561	67.3796	185.742	2.75665	1.46292	5.80021e-05	0.00055559	1	NA	1	NA	NA	NA	NA
SPAC17A2.12	564.738	543.141	586.335	1.07953	0.1104	0.636991	0.797664	NA	NA	NA	NA	NA	NA	NA
SPAC17A2.13c	5485.32	3885.12	7085.53	1.82376	0.866917	0.00119982	0.0071689	NA	NA	1	NA	NA	NA	NA
SPAC17A2.14	1056.09	1273.86	838.331	0.658105	-0.603611	0.00512377	0.0228994	NA	NA	1	NA	NA	NA	NA
SPAC17A5.01	705.498	908.844	502.152	0.552517	-0.855909	0.000141336	0.00117534	NA	NA	1	NA	NA	NA	NA
SPAC17A5.02c	387.874	426.658	349.091	0.818198	-0.289477	0.239804	0.42461	NA	NA	NA	NA	NA	NA	NA
SPAC17A5.03	10044.2	13842.1	6246.44	0.451265	-1.14795	0.000293663	0.00218159	NA	1	1	NA	NA	NA	NA
SPAC17A5.04c	279.983	313.773	246.193	0.784622	-0.349931	0.207251	0.382996	NA	NA	NA	NA	NA	NA	NA
SPAC17A5.05c	147.056	143.589	150.523	1.04829	0.0680346	0.870342	0.95709	NA	NA	NA	NA	NA	NA	NA
SPAC17A5.06	1181.1	1014.23	1347.96	1.32905	0.410393	0.0470494	0.129029	NA	NA	NA	NA	NA	NA	NA
SPAC17A5.07c	973.258	1010.9	935.615	0.925527	-0.111653	0.587857	0.765222	NA	NA	NA	NA	NA	NA	NA
SPAC17A5.08	1277.63	1222.67	1332.6	1.08991	0.124212	0.586947	0.765222	NA	NA	NA	NA	NA	NA	NA
SPAC17A5.09c	726.137	631.201	821.073	1.30081	0.37941	0.0972287	0.221299	NA	NA	NA	NA	NA	NA	NA
SPAC17A5.10	276.305	232.324	320.287	1.37862	0.463225	0.10096	0.227663	NA	NA	NA	NA	NA	NA	NA
SPAC17A5.11	16.3035	13.4759	19.131	1.41965	0.505531	0.636505	0.797664	NA	NA	NA	NA	NA	NA	NA
SPAC17A5.12	976.454	1011.22	941.691	0.931246	-0.102766	0.612829	0.781494	NA	NA	NA	NA	NA	NA	NA
SPAC17A5.13	183.335	216.2	150.469	0.695971	-0.522901	0.0832515	0.196894	NA	NA	NA	NA	NA	NA	NA
SPAC17A5.14	1825.38	1805.55	1845.21	1.02196	0.0313427	0.838871	0.939479	NA	NA	NA	NA	NA	NA	NA
SPAC17A5.15c	4821.53	6058.99	3584.07	0.59153	-0.757477	0.000151014	0.00124806	NA	NA	1	NA	NA	NA	NA
SPAC17A5.16	892.658	801.069	984.247	1.22867	0.297095	0.180462	0.345822	NA	NA	NA	NA	NA	NA	NA
SPAC17A5.18c	41.3856	42.7185	40.0528	0.937597	-0.0929599	0.861796	0.951919	NA	NA	NA	NA	NA	NA	NA
SPAC17A5.19	91.8069	97.7355	85.8783	0.878681	-0.186589	0.688637	0.83881	NA	NA	NA	NA	NA	NA	NA
SPAC17C9.01c	440.084	490.236	389.932	0.795396	-0.330254	0.168191	0.329387	NA	NA	NA	NA	NA	NA	NA
SPAC17C9.02c	300.555	365.898	235.213	0.642838	-0.637472	0.0306568	0.0933763	NA	NA	NA	NA	NA	NA	NA
SPAC17C9.03	17419	21717	13120.9	0.604177	-0.726957	0.000238821	0.00185239	NA	NA	1	NA	NA	1	NA
SPAC17C9.05c	75.4888	68.6714	82.3062	1.19855	0.261292	0.547196	0.731419	NA	NA	NA	NA	NA	NA	NA
SPAC17C9.06	776.799	499.935	1053.66	2.1076	1.0756	1.78252e-06	2.80422e-05	1	NA	1	NA	NA	NA	NA
SPAC17C9.07	975.247	955.795	994.699	1.0407	0.0575597	0.790054	0.910427	NA	NA	NA	NA	NA	NA	NA
SPAC17C9.08	735.889	541.321	930.457	1.71886	0.781454	0.000504919	0.00350559	NA	NA	1	NA	NA	NA	NA
SPAC17C9.09c	525.058	581.262	468.855	0.806617	-0.310045	0.176563	0.340456	NA	NA	NA	NA	NA	NA	NA
SPAC17C9.10	685.272	864.705	505.839	0.584985	-0.773528	0.000966713	0.00595709	NA	NA	1	NA	NA	NA	NA
SPAC17C9.11c	873.671	549.85	1197.49	2.17785	1.1229	0.00116929	0.00703556	1	NA	1	NA	NA	NA	NA
SPAC17C9.12	2180.12	1368.74	2991.51	2.18559	1.12802	0.00524047	0.0233429	1	NA	1	NA	NA	NA	NA
SPAC17C9.13c	1619.68	1680.93	1558.42	0.927118	-0.109176	0.612322	0.781146	NA	NA	NA	NA	NA	NA	NA
SPAC17C9.14	619.658	648.065	591.252	0.912333	-0.132367	0.598018	0.770097	NA	NA	NA	NA	NA	NA	NA
SPAC17C9.15c	565.352	575.511	555.194	0.964698	-0.0518511	0.800382	0.916332	NA	NA	NA	NA	NA	NA	NA
SPAC17C9.16c	592.421	349.718	835.124	2.38799	1.2558	5.5284e-08	1.2702e-06	1	NA	1	NA	NA	NA	NA
SPAC17D4.01	6706.33	6545.34	6867.33	1.04919	0.0692805	0.729841	0.866889	NA	NA	NA	NA	NA	NA	NA
SPAC17D4.02	584.236	722.666	445.805	0.616889	-0.696916	0.00288553	0.0146046	NA	NA	1	NA	NA	NA	NA
SPAC17D4.03c	589.035	593.048	585.022	0.986466	-0.0196587	0.948617	0.996614	NA	NA	NA	NA	NA	NA	NA
SPAC17D4.04	1119.25	1368.45	870.052	0.635794	-0.653368	0.0024055	0.0126639	NA	NA	1	NA	NA	1	NA
SPAC17G6.02c	391.405	248.911	533.898	2.14494	1.10093	0.000153309	0.00126234	1	NA	1	NA	NA	NA	NA
SPAC17G6.03	347.299	225.883	468.715	2.07504	1.05314	4.17006e-05	0.000421442	1	NA	1	NA	NA	NA	NA
SPAC17G6.04c	1140.1	1105.13	1175.08	1.0633	0.088544	0.666134	0.819461	NA	NA	NA	NA	NA	NA	NA
SPAC17G6.05c	1162.68	988.141	1337.23	1.35328	0.436456	0.0366946	0.106716	NA	NA	NA	NA	NA	NA	NA
SPAC17G6.06	2400.88	2829.87	1971.89	0.696812	-0.521158	0.0216265	0.0711938	NA	NA	NA	NA	NA	NA	NA
SPAC17G6.07c	611.333	631.649	591.018	0.935675	-0.0959203	0.708036	0.854585	NA	NA	NA	NA	NA	NA	NA
SPAC17G6.08	313.292	303.75	322.834	1.06283	0.0879109	0.725335	0.865005	NA	NA	NA	NA	NA	NA	NA
SPAC17G6.09	1197.9	1187.47	1208.32	1.01756	0.0251188	0.925547	0.985346	NA	NA	NA	NA	NA	NA	NA
SPAC17G6.10	1137.04	1183.57	1090.52	0.921381	-0.118131	0.550301	0.733255	NA	NA	NA	NA	NA	NA	NA
SPAC17G6.11c	1601.35	1932.42	1270.29	0.657358	-0.605249	0.0038455	0.0182477	NA	NA	1	NA	NA	NA	NA
SPAC17G6.12	867.123	635.881	1098.36	1.72731	0.788528	0.000256863	0.00194936	NA	NA	1	NA	NA	NA	NA
SPAC17G6.13	2354.99	2036.81	2673.16	1.31242	0.392232	0.0513261	0.137652	NA	NA	NA	NA	NA	NA	NA
SPAC17G6.14c	4164.26	4621.75	3706.78	0.802031	-0.31827	0.106879	0.238038	NA	NA	NA	NA	NA	NA	NA
SPAC17G6.15c	1018.5	1393.44	643.56	0.461849	-1.11451	3.13571e-07	6.04188e-06	NA	1	1	NA	NA	NA	NA
SPAC17G6.16c	1305.59	1276.16	1335.02	1.04613	0.0650622	0.755867	0.884601	NA	NA	NA	NA	NA	NA	NA
SPAC17G6.17	323.523	341.391	305.655	0.895322	-0.159521	0.526893	0.714088	NA	NA	NA	NA	NA	1	NA
SPAC17G8.01c	821.075	1010.15	631.996	0.625643	-0.676588	0.00235287	0.0124457	NA	NA	1	NA	NA	NA	NA
SPAC17G8.02	185.82	191.563	180.077	0.940038	-0.0892092	0.75675	0.885325	NA	NA	NA	NA	NA	NA	NA
SPAC17G8.03c	449.979	417.593	482.364	1.15511	0.208026	0.377155	0.578627	NA	NA	NA	NA	NA	NA	NA
SPAC17G8.04c	987.111	851.203	1123.02	1.31933	0.399808	0.0703309	0.17416	NA	NA	NA	NA	NA	NA	NA
SPAC17G8.05	177.038	197.778	156.299	0.790276	-0.339571	0.365218	0.567085	NA	NA	NA	NA	NA	NA	NA
SPAC17G8.06c	4090.22	6433.21	1747.22	0.271594	-1.88048	4.45475e-12	2.34523e-10	NA	1	1	NA	NA	NA	NA
SPAC17G8.07	219.446	253.615	185.276	0.73054	-0.452965	0.156466	0.312091	NA	NA	NA	NA	NA	NA	NA
SPAC17G8.08c	735.105	1115.89	354.319	0.317521	-1.65508	4.16854e-10	1.49843e-08	NA	1	1	NA	NA	NA	NA
SPAC17G8.09	135.036	167.723	102.348	0.610224	-0.71259	0.0364491	0.106233	NA	NA	NA	NA	NA	NA	NA
SPAC17G8.10c	558.332	384.93	731.734	1.90095	0.926723	0.00914222	0.0362419	NA	NA	1	NA	NA	NA	NA
SPAC17G8.11c	674.867	647.911	701.822	1.08321	0.11531	0.590332	0.766548	NA	NA	NA	NA	NA	NA	NA
SPAC17G8.12	743.367	632.754	853.98	1.34962	0.432557	0.0931784	0.21416	NA	NA	NA	NA	NA	NA	NA
SPAC17G8.13c	709.77	614.582	804.958	1.30976	0.389308	0.0808806	0.192994	NA	NA	NA	1	NA	NA	NA
SPAC17G8.14c	1625.18	1330.56	1919.79	1.44284	0.528916	0.0105974	0.0409325	NA	NA	1	NA	NA	NA	NA
SPAC17G8.15	30.0675	31.2084	28.9267	0.926887	-0.109535	0.927464	0.986499	NA	NA	NA	NA	NA	NA	NA
SPAC17H9.01	945.782	993.119	898.445	0.90467	-0.144537	0.497337	0.68884	NA	NA	NA	NA	NA	NA	NA
SPAC17H9.02	1189.82	1425.33	954.313	0.669536	-0.578766	0.0064816	0.0278151	NA	NA	1	NA	NA	1	NA
SPAC17H9.03c	112.996	81.1644	144.828	1.78438	0.835426	0.0219299	0.0719128	NA	NA	NA	NA	NA	NA	NA
SPAC17H9.04c	957.154	1303.29	611.02	0.46883	-1.09286	1.30777e-05	0.000154483	NA	1	1	NA	NA	1	NA
SPAC17H9.05	1404.94	2046.63	763.261	0.372936	-1.423	2.41378e-10	9.16961e-09	NA	1	1	NA	NA	NA	NA
SPAC17H9.06c	267.758	252.193	283.323	1.12344	0.167922	0.565677	0.746734	NA	NA	NA	NA	NA	NA	NA
SPAC17H9.07	515.525	621.097	409.952	0.660044	-0.599365	0.0142062	0.0512036	NA	NA	NA	NA	NA	NA	NA
SPAC17H9.08	226.665	244.809	208.521	0.85177	-0.231464	0.384683	0.585742	NA	NA	NA	NA	1	NA	NA
SPAC17H9.09c	323.501	312.311	334.692	1.07166	0.0998489	0.712414	0.857869	NA	NA	NA	NA	1	NA	NA
SPAC17H9.10c	1255.96	1336.18	1175.75	0.879936	-0.184529	0.371827	0.574693	NA	NA	NA	NA	NA	NA	NA
SPAC17H9.11	299.413	367.165	231.66	0.630941	-0.664423	0.0120266	0.0451112	NA	NA	1	NA	NA	NA	NA
SPAC17H9.12c	893.333	941.994	844.672	0.896685	-0.157327	0.476271	0.67053	NA	NA	NA	NA	1	NA	NA
SPAC17H9.13c	717.428	937.258	497.599	0.530909	-0.913464	5.31333e-05	0.000515601	NA	NA	1	NA	NA	1	NA
SPAC17H9.14c	4557.02	4287.67	4826.37	1.12564	0.170743	0.386217	0.587275	NA	NA	NA	NA	NA	NA	NA
SPAC17H9.16	554.232	631.689	476.775	0.754762	-0.405906	0.0786243	0.188907	NA	NA	NA	NA	NA	NA	NA
SPAC17H9.17c	167.358	193.204	141.512	0.732449	-0.4492	0.143281	0.293408	NA	NA	NA	NA	NA	NA	NA
SPAC17H9.18c	26.9272	20.0474	33.807	1.68635	0.753908	0.307189	0.50563	NA	NA	NA	NA	NA	NA	NA
SPAC17H9.19c	721.779	601.626	841.933	1.39943	0.484839	0.0310215	0.0940632	NA	NA	NA	NA	NA	NA	NA
SPAC17H9.20	468.694	439.809	497.58	1.13136	0.178052	0.485864	0.679737	NA	NA	NA	NA	NA	NA	NA
SPAC1805.01c	1105.28	1088.43	1122.14	1.03096	0.0439944	0.859562	0.951023	NA	NA	NA	NA	NA	NA	NA
SPAC1805.02c	1163.24	1267.62	1058.86	0.835318	-0.259603	0.225167	0.406663	NA	NA	NA	NA	NA	NA	NA
SPAC1805.03c	133.199	161.817	104.581	0.646288	-0.62975	0.0615893	0.158746	NA	NA	NA	NA	NA	NA	NA
SPAC1805.04	1802.6	1927.89	1677.3	0.870019	-0.200881	0.323649	0.523698	NA	NA	NA	NA	NA	NA	NA
SPAC1805.05	1572.71	1710.69	1434.74	0.838687	-0.253796	0.218808	0.397974	NA	NA	NA	NA	NA	NA	NA
SPAC1805.06c	790.128	913.321	666.935	0.73023	-0.453577	0.0555602	0.146886	NA	NA	NA	NA	NA	NA	NA
SPAC1805.07c	61.3207	48.624	74.0174	1.52224	0.606197	0.175309	0.33935	NA	NA	NA	NA	NA	NA	NA
SPAC1805.08	1170.93	1247.32	1094.54	0.877511	-0.188511	0.348531	0.549853	NA	NA	NA	NA	NA	NA	NA
SPAC1805.09c	37.2061	27.4232	46.9889	1.71347	0.776923	0.144841	0.295515	NA	NA	NA	NA	NA	NA	NA
SPAC1805.10	1109.35	1153.87	1064.83	0.922833	-0.115859	0.625827	0.789173	NA	NA	NA	NA	NA	NA	NA
SPAC1805.11c	5637.97	7490.59	3785.36	0.505348	-0.984651	6.30133e-07	1.14175e-05	NA	NA	1	NA	NA	NA	NA
SPAC1805.12c	3810.38	5240.06	2380.7	0.454326	-1.1382	1.1863e-07	2.51001e-06	NA	1	1	NA	NA	NA	NA
SPAC1805.13	8765.78	11240.8	6290.71	0.55963	-0.837455	2.38879e-05	0.000256776	NA	NA	1	NA	NA	NA	NA
SPAC1805.14	556.448	599.628	513.268	0.855978	-0.224354	0.338148	0.538941	NA	NA	NA	NA	NA	NA	NA
SPAC1805.15c	236.854	165.586	308.122	1.86079	0.895919	0.06657	0.167012	NA	NA	NA	NA	NA	NA	NA
SPAC1805.16c	333.249	340.669	325.829	0.95644	-0.0642543	0.902573	0.973172	NA	NA	NA	NA	NA	NA	NA
SPAC1805.17	5624.04	6052.98	5195.1	0.858272	-0.220493	0.252877	0.442023	NA	NA	NA	NA	NA	NA	NA
SPAC1805.18	95.925	100.7	91.1498	0.90516	-0.143755	0.728991	0.866495	NA	NA	NA	NA	NA	NA	NA
SPAC1834.01	2388.4	2828.51	1948.29	0.688803	-0.537837	0.00873363	0.0351484	NA	NA	1	NA	NA	1	NA
SPAC1834.02	8819.77	8568.65	9070.89	1.05861	0.0821776	0.663457	0.817286	NA	NA	NA	NA	NA	NA	NA
SPAC1834.03c	2217.09	1778.09	2656.09	1.49379	0.578975	0.0055402	0.0244178	NA	NA	1	NA	NA	NA	NA
SPAC1834.04	2357.13	1982.87	2731.38	1.37748	0.462036	0.0244339	0.077867	NA	NA	NA	NA	NA	NA	NA
SPAC1834.05	751.14	836.517	665.762	0.795873	-0.32939	0.142066	0.291544	NA	NA	NA	NA	NA	NA	NA
SPAC1834.06c	614.625	652.394	576.856	0.884214	-0.177533	0.429486	0.627563	NA	NA	NA	NA	NA	NA	NA
SPAC1834.07	453.602	396.254	510.95	1.28945	0.366758	0.128211	0.270331	NA	NA	NA	NA	NA	NA	NA
SPAC1834.08	2244.81	2099.17	2390.45	1.13876	0.187466	0.332823	0.533506	NA	NA	NA	NA	NA	NA	NA
SPAC1834.09	232.791	174.302	291.281	1.67112	0.740819	0.00850178	0.0344294	NA	NA	1	NA	NA	NA	NA
SPAC1834.10c	540.512	598.019	483.004	0.807674	-0.308155	0.181447	0.347018	NA	NA	NA	NA	NA	NA	NA
SPAC1834.11c	2711.19	2449.56	2972.82	1.21361	0.27931	0.16675	0.327044	NA	NA	NA	NA	NA	NA	NA
SPAC1834.13	2.74348	3.11924	2.36773	0.759072	-0.39769	1	1	NA	NA	NA	NA	NA	NA	NA
SPAC1851.02	1296.25	1366.14	1226.36	0.897678	-0.15573	0.475505	0.670157	NA	NA	NA	NA	NA	NA	NA
SPAC1851.03	639.244	657.285	621.203	0.945105	-0.0814542	0.744444	0.876757	NA	NA	NA	NA	NA	NA	NA
SPAC1851.04c	1599.47	1308.74	1890.21	1.4443	0.53037	0.0110962	0.042551	NA	NA	1	NA	NA	NA	NA
SPAC186.01	21.6717	31.054	12.2895	0.395747	-1.33735	0.0618863	0.159327	NA	NA	NA	NA	NA	NA	NA
SPAC186.02c	5.04085	4.43514	5.64657	1.27315	0.348397	0.896307	0.973172	NA	NA	NA	NA	NA	NA	NA
SPAC186.03	0	0	0	NA	NA	NA	NA	NA	NA	NA	NA	NA	NA	NA
SPAC186.04c	73.6975	9.52822	137.867	14.4693	3.85492	0.00280833	0.0143442	1	NA	1	NA	NA	NA	NA
SPAC186.05c	171.112	170.728	171.497	1.00451	0.00648888	1	1	NA	NA	NA	NA	NA	NA	NA
SPAC186.06	0	0	0	NA	NA	NA	NA	NA	NA	NA	NA	NA	NA	NA
SPAC186.07c	0	0	0	NA	NA	NA	NA	NA	NA	NA	NA	NA	NA	NA
SPAC186.08c	0.178134	0	0.356268	Inf	Inf	1	1	NA	NA	NA	NA	NA	NA	NA
SPAC186.09	1.95883	2.13633	1.78134	0.833832	-0.262171	1	1	NA	NA	NA	NA	NA	NA	NA
SPAC18B11.02c	364.149	484.705	243.593	0.502559	-0.992636	0.0187969	0.0636657	NA	NA	NA	1	NA	1	NA
SPAC18B11.03c	153.109	136.514	169.704	1.24312	0.31397	0.323219	0.523232	NA	NA	NA	NA	NA	NA	NA
SPAC18B11.04	554.722	335.795	773.65	2.30394	1.2041	0.00208651	0.0113142	1	NA	1	NA	NA	NA	NA
SPAC18B11.05	381.737	306.544	456.93	1.49059	0.57588	0.0202011	0.0675526	NA	NA	NA	NA	NA	NA	NA
SPAC18B11.06	504.64	734.648	274.632	0.373828	-1.41955	4.88382e-09	1.40143e-07	NA	1	1	NA	NA	1	NA
SPAC18B11.07c	470.469	444.446	496.491	1.1171	0.159759	0.55937	0.741759	NA	NA	NA	NA	NA	NA	NA
SPAC18B11.08c	469.177	554.278	384.077	0.692933	-0.529212	0.0289061	0.0890555	NA	NA	NA	NA	NA	NA	NA
SPAC18B11.09c	239.706	240.033	239.38	0.997279	-0.00393057	0.991856	1	NA	NA	NA	NA	NA	NA	NA
SPAC18B11.10	873.31	968.125	778.496	0.804127	-0.314505	0.148023	0.299722	NA	NA	NA	NA	NA	NA	NA
SPAC18B11.11	721.761	670.444	773.078	1.15308	0.205498	0.362916	0.564162	NA	NA	NA	NA	NA	NA	NA
SPAC18G6.01c	342.719	176.13	509.309	2.89167	1.5319	0.0186142	0.063175	NA	NA	NA	NA	NA	NA	NA
SPAC18G6.02c	491.048	598.824	383.273	0.640043	-0.64376	0.00726915	0.0305286	NA	NA	1	NA	NA	1	NA
SPAC18G6.03	1843.28	1875.83	1810.73	0.965296	-0.0509563	0.855994	0.949274	NA	NA	NA	NA	NA	NA	NA
SPAC18G6.04c	1554.32	1319.45	1789.18	1.35601	0.439363	0.0394119	0.112707	NA	NA	NA	NA	1	NA	NA
SPAC18G6.05c	7919.56	8880.47	6958.66	0.783591	-0.351827	0.0748015	0.182065	NA	NA	NA	NA	NA	NA	NA
SPAC18G6.06	617.743	775.059	460.427	0.594054	-0.751333	0.00129975	0.00764975	NA	NA	1	NA	NA	1	NA
SPAC18G6.07c	864.411	1258.01	470.813	0.374252	-1.41792	2.96984e-10	1.10929e-08	NA	1	1	NA	NA	1	NA
SPAC18G6.09c	3491	2484.77	4497.23	1.80992	0.855926	0.00978811	0.0381594	NA	NA	1	NA	NA	NA	NA
SPAC18G6.10	1328.57	1178.57	1478.57	1.25455	0.327168	0.114458	0.249434	NA	NA	NA	NA	NA	NA	NA
SPAC18G6.11c	1169.22	1454.93	883.517	0.607259	-0.719615	0.000726301	0.00471004	NA	NA	1	NA	NA	NA	1
SPAC18G6.12c	287.169	267.464	306.875	1.14735	0.198304	0.471093	0.667315	NA	NA	NA	NA	NA	NA	NA
SPAC18G6.13	33.2319	28.7471	37.7166	1.31201	0.39178	0.517915	0.706039	NA	NA	NA	NA	1	NA	NA
SPAC18G6.14c	13412.5	18427.9	8397.06	0.455671	-1.13394	1.02906e-06	1.74185e-05	NA	1	1	NA	NA	NA	NA
SPAC18G6.15	1269.54	1420.29	1118.79	0.78772	-0.344245	0.0963718	0.219912	NA	NA	NA	NA	NA	NA	NA
SPAC1952.01	401.4	425.326	377.475	0.887497	-0.172186	0.490629	0.683275	NA	NA	NA	NA	NA	NA	NA
SPAC1952.02	357.237	475.241	239.233	0.503391	-0.990247	0.000125443	0.001063	NA	NA	1	NA	NA	1	NA
SPAC1952.03	232.034	241.674	222.393	0.920221	-0.119947	0.654345	0.81103	NA	NA	NA	NA	NA	NA	NA
SPAC1952.04c	129.307	90.3596	168.253	1.86204	0.896886	0.00900283	0.0358692	NA	NA	1	NA	NA	NA	NA
SPAC1952.05	579.039	678.185	479.894	0.707615	-0.498963	0.0283499	0.0877939	NA	NA	NA	NA	NA	NA	NA
SPAC1952.06c	650.678	835.599	465.756	0.557392	-0.843235	0.000184299	0.00148103	NA	NA	1	NA	NA	NA	NA
SPAC1952.07	344.599	372.421	316.778	0.85059	-0.233464	0.379334	0.58024	NA	NA	NA	NA	NA	NA	NA
SPAC1952.08c	1049.27	901.33	1197.21	1.32827	0.409545	0.0625667	0.160461	NA	NA	NA	NA	NA	NA	NA
SPAC1952.09c	3155.99	1245.44	5066.54	4.06806	2.02434	0.000253872	0.00193766	1	NA	1	NA	1	NA	NA
SPAC1952.10c	180.343	181.385	179.301	0.988511	-0.0166718	0.92902	0.987351	NA	NA	NA	NA	NA	NA	NA
SPAC1952.11c	1362.37	1299.27	1425.47	1.09713	0.133732	0.497128	0.68883	NA	NA	NA	NA	NA	NA	NA
SPAC1952.12c	102.954	140.47	65.4389	0.465857	-1.10204	0.00254788	0.0132466	NA	1	1	NA	NA	NA	NA
SPAC1952.13	2054.48	1123.13	2985.82	2.65847	1.4106	1.18724e-10	4.64205e-09	1	NA	1	NA	NA	NA	NA
SPAC1952.14c	365.575	415.131	316.018	0.761249	-0.39356	0.123356	0.262682	NA	NA	NA	NA	NA	NA	NA
SPAC1952.15c	49.3287	47.4786	51.1789	1.07793	0.10827	0.852829	0.948028	NA	NA	NA	NA	NA	NA	NA
SPAC1952.16	613.183	577.306	649.061	1.12429	0.169017	0.471638	0.667628	NA	NA	NA	NA	NA	NA	NA
SPAC1952.17c	343.921	267.464	420.377	1.57171	0.652339	0.0117067	0.0441059	NA	NA	1	NA	NA	NA	NA
SPAC19A8.01c	910.637	812.051	1009.22	1.24281	0.313602	0.145307	0.295925	NA	NA	NA	NA	NA	NA	NA
SPAC19A8.02	1563.76	1319.19	1808.33	1.37078	0.455001	0.0263555	0.082768	NA	NA	NA	NA	NA	NA	NA
SPAC19A8.03	1194.13	856.499	1531.76	1.78839	0.838665	0.000554114	0.00379203	NA	NA	1	NA	NA	NA	NA
SPAC19A8.04	7824.56	7718.99	7930.13	1.02735	0.0389326	0.862745	0.952181	NA	NA	NA	NA	NA	NA	NA
SPAC19A8.05c	793.183	411.061	1175.3	2.85919	1.51561	0.00156987	0.00891015	1	NA	1	NA	NA	NA	NA
SPAC19A8.06	607.558	610.773	604.344	0.989474	-0.0152665	0.998482	1	NA	NA	NA	NA	NA	NA	NA
SPAC19A8.07c	497.14	740.172	254.107	0.343308	-1.54242	1.54881e-08	3.9374e-07	NA	1	1	NA	NA	1	NA
SPAC19A8.08	1488.29	1398.28	1578.3	1.12874	0.174712	0.411959	0.610104	NA	NA	NA	NA	NA	1	NA
SPAC19A8.09	98.6064	86.5664	110.646	1.27817	0.354079	0.325941	0.526005	NA	NA	NA	NA	NA	NA	NA
SPAC19A8.10	292.581	275.189	309.974	1.1264	0.171722	0.532573	0.718505	NA	NA	NA	NA	NA	NA	NA
SPAC19A8.11c	495.281	526.537	464.025	0.881277	-0.182333	0.435699	0.633692	NA	NA	NA	NA	NA	NA	NA
SPAC19A8.12	1199.19	983.477	1414.9	1.43868	0.524741	0.0148257	0.0528666	NA	NA	NA	NA	NA	1	NA
SPAC19A8.13	611.132	619.196	603.068	0.973954	-0.038075	0.868008	0.955623	NA	NA	NA	NA	NA	1	NA
SPAC19A8.14	478.848	433.018	524.678	1.21168	0.277005	0.2345	0.418099	NA	NA	NA	NA	NA	NA	NA
SPAC19A8.15	4685.48	5159.96	4211.01	0.816093	-0.293194	0.151935	0.305423	NA	NA	NA	NA	NA	NA	NA
SPAC19A8.16	180.109	10.9986	349.22	31.7514	4.98875	0.0412509	0.116668	NA	NA	NA	NA	NA	NA	NA
SPAC19B12.01	934.517	1390.16	478.878	0.344478	-1.53751	1.58365e-06	2.51633e-05	NA	1	1	NA	NA	NA	NA
SPAC19B12.02c	9965.48	12623.7	7307.29	0.578856	-0.788723	4.39937e-05	0.000440332	NA	NA	1	NA	NA	NA	NA
SPAC19B12.03	5084.03	5811.21	4356.86	0.749734	-0.415549	0.0405336	0.115224	NA	NA	NA	NA	NA	NA	NA
SPAC19B12.04	1690.19	2221.42	1158.95	0.521715	-0.938665	6.25833e-06	8.2531e-05	NA	NA	1	NA	NA	NA	NA
SPAC19B12.05c	1684.41	1584.36	1784.46	1.1263	0.171587	0.404898	0.605239	NA	NA	NA	NA	NA	NA	NA
SPAC19B12.06c	1162.88	1294.47	1031.29	0.796689	-0.327911	0.138372	0.285983	NA	NA	NA	NA	NA	NA	NA
SPAC19B12.07c	369.675	357.669	381.68	1.06713	0.0937389	0.74358	0.876203	NA	NA	NA	NA	NA	NA	NA
SPAC19B12.08	298.218	139.317	457.119	3.28115	1.7142	0.002686	0.0138356	1	NA	1	NA	NA	NA	NA
SPAC19B12.09	266.443	300.923	231.962	0.770836	-0.375505	0.254615	0.444363	NA	NA	NA	NA	NA	NA	NA
SPAC19B12.10	423.319	270.607	576.031	2.12866	1.08994	0.097117	0.221235	NA	NA	NA	NA	NA	NA	NA
SPAC19B12.11c	244.886	344.007	145.765	0.423728	-1.23879	1.08565e-05	0.000131497	NA	1	1	NA	NA	NA	NA
SPAC19B12.12c	72.5892	81.4894	63.6891	0.781564	-0.355564	0.39095	0.592321	NA	NA	NA	NA	NA	NA	NA
SPAC19B12.13	1.19963	0	2.39926	Inf	Inf	0.536827	0.721792	NA	NA	NA	NA	NA	NA	NA
SPAC19D5.01	785.387	452.488	1118.29	2.47142	1.30534	1.0088e-08	2.62244e-07	1	NA	1	NA	NA	NA	NA
SPAC19D5.02c	380.025	358.807	401.244	1.11827	0.161272	0.538939	0.723724	NA	NA	NA	NA	NA	NA	NA
SPAC19D5.03	209.74	193.026	226.454	1.17318	0.230423	0.411738	0.610104	NA	NA	NA	NA	NA	1	NA
SPAC19D5.04	7517.49	7110.76	7924.21	1.1144	0.156263	0.371227	0.57441	NA	NA	NA	NA	NA	NA	NA
SPAC19D5.05c	219.894	293.531	146.257	0.498267	-1.00501	0.000713662	0.00465063	NA	1	1	NA	NA	1	NA
SPAC19D5.06c	470.441	517.204	423.679	0.819173	-0.287761	0.208735	0.384768	NA	NA	NA	NA	NA	NA	NA
SPAC19D5.07	246.666	192.051	301.282	1.56876	0.649625	0.0207269	0.068911	NA	NA	NA	NA	NA	NA	NA
SPAC19D5.09c	0	0	0	NA	NA	NA	NA	NA	NA	NA	NA	NA	NA	NA
SPAC19D5.10c	52.4883	57.0229	47.9537	0.840956	-0.249898	0.537492	0.722343	NA	NA	NA	NA	NA	NA	NA
SPAC19D5.11c	33.4717	41.882	25.0614	0.598382	-0.740862	0.23651	0.420449	NA	NA	NA	NA	NA	NA	NA
SPAC19E9.01c	1364.18	1281.1	1447.26	1.1297	0.175941	0.401196	0.603327	NA	NA	NA	NA	NA	NA	NA
SPAC19E9.02	1691.41	1417.27	1965.55	1.38686	0.471823	0.026312	0.0827491	NA	NA	NA	NA	NA	NA	NA
SPAC19E9.03	2445.85	1541.9	3349.8	2.17251	1.11936	0.00294277	0.0147935	1	NA	1	NA	NA	NA	NA
SPAC19G12.01c	267.569	290.46	244.677	0.842377	-0.247462	0.360023	0.560854	NA	NA	NA	NA	NA	NA	NA
SPAC19G12.02c	484.835	487.117	482.552	0.99063	-0.0135816	0.968197	1	NA	NA	NA	NA	NA	NA	NA
SPAC19G12.03	499.729	377.993	621.464	1.64411	0.71731	0.00235182	0.0124457	NA	NA	1	NA	NA	NA	NA
SPAC19G12.04	105.962	120.074	91.8496	0.764944	-0.386574	0.332393	0.532944	NA	NA	NA	NA	NA	NA	NA
SPAC19G12.05	1073.75	1798.36	349.142	0.194145	-2.36479	4.15385e-26	9.91879e-24	NA	1	1	NA	NA	NA	NA
SPAC19G12.06c	1623.23	1412.49	1833.97	1.29839	0.376726	0.0638242	0.162302	NA	NA	NA	NA	NA	NA	NA
SPAC19G12.07c	1387.5	1357.04	1417.96	1.0449	0.0633634	0.778234	0.902292	NA	NA	NA	NA	NA	1	NA
SPAC19G12.08	2806.39	2095.22	3517.57	1.67886	0.74748	0.0122376	0.0456541	NA	NA	1	NA	NA	NA	NA
SPAC19G12.09	4968.8	1041.7	8895.9	8.53978	3.0942	0.00541405	0.0239271	1	NA	1	NA	NA	NA	NA
SPAC19G12.10c	29289.6	20563	38016.1	1.84876	0.886559	0.0365146	0.106331	NA	NA	NA	NA	NA	NA	NA
SPAC19G12.11	1176.28	963.259	1389.3	1.44229	0.528361	0.0143449	0.0515091	NA	NA	NA	NA	NA	NA	NA
SPAC19G12.12	324.578	310.361	338.794	1.09161	0.126459	0.683967	0.834794	NA	NA	NA	NA	NA	NA	NA
SPAC19G12.13c	220.884	195.657	246.111	1.25787	0.330982	0.246113	0.432574	NA	NA	NA	1	NA	NA	NA
SPAC19G12.14	1617.08	1464.06	1770.11	1.20904	0.27386	0.202176	0.376322	NA	NA	NA	NA	NA	NA	NA
SPAC19G12.15c	4539.18	3841.24	5237.11	1.36339	0.447198	0.024333	0.0776935	NA	NA	NA	NA	NA	NA	NA
SPAC19G12.16c	6862.75	6719.85	7005.65	1.04253	0.0600887	0.834971	0.936223	NA	NA	NA	NA	NA	NA	NA
SPAC19G12.17	127.671	135.369	119.973	0.886263	-0.174192	0.611224	0.780192	NA	NA	NA	NA	NA	NA	NA
SPAC1A6.01c	489.287	483.015	495.559	1.02597	0.0369901	0.910562	0.977367	NA	NA	NA	NA	NA	NA	NA
SPAC1A6.02	555.286	652.314	458.258	0.702512	-0.509405	0.0357318	0.10469	NA	NA	NA	NA	NA	NA	NA
SPAC1A6.03c	2277.04	2288.7	2265.38	0.989813	-0.014772	0.987327	1	NA	NA	NA	NA	NA	NA	NA
SPAC1A6.04c	43566.4	15017.2	72115.5	4.80221	2.2637	4.31153e-19	5.76538e-17	1	NA	1	NA	1	NA	NA
SPAC1A6.05c	588.556	595.267	581.845	0.977452	-0.0329024	0.979648	1	NA	NA	NA	NA	NA	NA	NA
SPAC1A6.06c	23.8501	23.4996	24.2006	1.02983	0.042405	1	1	NA	NA	NA	NA	NA	NA	NA
SPAC1A6.07	1223.77	1113.17	1334.36	1.19871	0.26148	0.204268	0.379161	NA	NA	NA	NA	NA	NA	NA
SPAC1A6.08c	91.9204	71.1327	112.708	1.58448	0.664008	0.0838698	0.198076	NA	NA	NA	NA	NA	NA	NA
SPAC1A6.09c	1523.38	1736.38	1310.38	0.754662	-0.406097	0.0467685	0.128628	NA	NA	NA	NA	NA	NA	NA
SPAC1A6.10	1328.03	1765.83	890.231	0.504142	-0.988097	3.20378e-06	4.68719e-05	NA	NA	1	NA	NA	NA	NA
SPAC1A6.11	11.3543	13.4679	9.24079	0.686135	-0.543436	0.647738	0.805876	NA	NA	NA	NA	NA	NA	NA
SPAC1B1.01	1705.12	1548.8	1861.43	1.20185	0.26526	0.178552	0.342946	NA	NA	NA	NA	NA	NA	1
SPAC1B1.02c	498.942	491.552	506.332	1.03007	0.0427409	0.889783	0.971755	NA	NA	NA	NA	NA	NA	NA
SPAC1B1.03c	3119.35	4046.44	2192.26	0.541776	-0.884233	1.32588e-05	0.000155251	NA	NA	1	NA	NA	NA	NA
SPAC1B1.04c	861.532	920.183	802.881	0.872523	-0.196735	0.363701	0.56525	NA	NA	NA	NA	NA	NA	NA
SPAC1B2.02c	1135.67	1060	1211.35	1.14279	0.192554	0.375925	0.577933	NA	NA	NA	NA	NA	NA	NA
SPAC1B2.03c	4843.43	5711.97	3974.89	0.695889	-0.523071	0.00738891	0.0308957	NA	NA	1	NA	NA	NA	NA
SPAC1B2.04	922.722	736.483	1108.96	1.50575	0.590483	0.0065016	0.0278831	NA	NA	1	NA	NA	NA	NA
SPAC1B2.05	576.414	663.84	488.988	0.736606	-0.441035	0.0634164	0.161833	NA	NA	NA	NA	NA	NA	NA
SPAC1B2.06	29.822	42.556	17.088	0.401542	-1.31638	0.0312267	0.0942155	NA	NA	NA	NA	NA	NA	NA
SPAC1B3.01c	404.865	532.224	277.506	0.521409	-0.939513	0.000248475	0.00190735	NA	NA	1	1	NA	NA	NA
SPAC1B3.02c	705.03	781.476	628.584	0.804354	-0.314097	0.170965	0.333548	NA	NA	NA	NA	NA	NA	NA
SPAC1B3.03c	5821.67	7421.38	4221.95	0.56889	-0.813777	0.00726458	0.0305286	NA	NA	1	NA	NA	NA	NA
SPAC1B3.04c	270.048	207.338	332.758	1.60491	0.68249	0.0130775	0.0482006	NA	NA	1	NA	NA	NA	NA
SPAC1B3.05	1483.98	1574.77	1393.2	0.884697	-0.176745	0.420844	0.618409	NA	NA	NA	1	NA	NA	NA
SPAC1B3.06c	533.586	380.332	686.839	1.80589	0.852711	0.000330361	0.00241706	NA	NA	1	NA	NA	NA	NA
SPAC1B3.07c	468.535	429.444	507.627	1.18206	0.241298	0.313636	0.513209	NA	NA	NA	NA	NA	NA	NA
SPAC1B3.08	1432.93	1137.97	1727.89	1.5184	0.602554	0.00363428	0.0174733	NA	NA	1	NA	NA	NA	NA
SPAC1B3.09c	1318.49	1443.22	1193.76	0.827147	-0.273785	0.263362	0.454996	NA	NA	NA	NA	NA	NA	NA
SPAC1B3.10c	324.709	296.976	352.442	1.18677	0.247041	0.292895	0.490678	NA	NA	NA	NA	NA	NA	NA
SPAC1B3.11c	104.135	88.3858	119.884	1.35637	0.439751	0.231966	0.414796	NA	NA	NA	NA	NA	NA	NA
SPAC1B3.12c	400.72	565.252	236.187	0.417844	-1.25896	5.1957e-06	7.08948e-05	NA	1	1	NA	NA	NA	NA
SPAC1B3.13	1622.79	2219.63	1025.95	0.462216	-1.11336	1.04682e-07	2.25776e-06	NA	1	1	NA	NA	1	NA
SPAC1B3.14	1386.06	1565.98	1206.14	0.770219	-0.37666	0.0851802	0.200463	NA	NA	NA	NA	NA	NA	NA
SPAC1B3.15c	396.17	355.525	436.815	1.22865	0.297071	0.472315	0.667793	NA	NA	NA	NA	NA	NA	NA
SPAC1B3.16c	2293.76	3388.61	1198.91	0.353805	-1.49897	1.19225e-08	3.05231e-07	NA	1	1	NA	NA	NA	NA
SPAC1B3.17	380.038	518.642	241.433	0.46551	-1.10312	1.22193e-05	0.000145112	NA	1	1	NA	NA	NA	NA
SPAC1B3.18c	228.299	241.983	214.615	0.886903	-0.173152	0.573856	0.754427	NA	NA	NA	NA	NA	NA	NA
SPAC1B3.20	294.476	214.259	374.693	1.74879	0.806356	0.0379624	0.109545	NA	NA	NA	NA	NA	NA	NA
SPAC1B3.21	65.3226	48.957	81.6883	1.66857	0.738614	0.100592	0.227215	NA	NA	NA	NA	NA	NA	NA
SPAC1B9.02c	1810.39	1382.22	2238.56	1.61954	0.69558	0.000826532	0.00521831	NA	NA	1	1	NA	NA	NA
SPAC1B9.03c	792.544	1106.39	478.701	0.432671	-1.20866	9.86951e-08	2.14943e-06	NA	1	1	NA	NA	1	NA
SPAC1D4.01	356.612	408.528	304.696	0.745839	-0.423064	0.117725	0.253578	NA	NA	NA	NA	NA	NA	NA
SPAC1D4.02c	688.016	464.502	911.53	1.96238	0.972607	0.000306418	0.00226878	NA	NA	1	NA	NA	NA	NA
SPAC1D4.03c	283.816	185.82	381.813	2.05474	1.03896	0.00015236	0.00125763	1	NA	1	NA	NA	NA	NA
SPAC1D4.04	2981.61	3304.37	2658.85	0.804646	-0.313573	0.145422	0.296023	NA	NA	NA	NA	NA	NA	NA
SPAC1D4.05c	378.439	396.432	360.447	0.909227	-0.137287	0.571459	0.752713	NA	NA	NA	NA	1	NA	NA
SPAC1D4.06c	261.172	265.954	256.39	0.964038	-0.0528374	0.899034	0.973172	NA	NA	NA	NA	NA	NA	NA
SPAC1D4.07c	3.73344	3.11924	4.34765	1.39382	0.479042	0.850485	0.946778	NA	NA	NA	NA	NA	NA	NA
SPAC1D4.08	1463.68	1589.75	1337.6	0.84139	-0.249153	0.241582	0.426855	NA	NA	NA	NA	NA	NA	NA
SPAC1D4.09c	564.911	656.837	472.985	0.720094	-0.473743	0.0407138	0.115589	NA	NA	NA	NA	NA	NA	NA
SPAC1D4.10	481.691	448.55	514.831	1.14777	0.19883	0.429822	0.627826	NA	NA	NA	NA	NA	NA	NA
SPAC1D4.11c	1127.29	691.514	1563.07	2.26036	1.17655	0.0068856	0.0291929	1	NA	1	NA	NA	NA	NA
SPAC1D4.12	658.412	657.82	659.005	1.0018	0.00259493	0.991587	1	NA	NA	NA	NA	NA	NA	NA
SPAC1D4.13	656.775	477.58	835.97	1.75043	0.807707	0.000438992	0.00309283	NA	NA	1	NA	NA	NA	NA
SPAC1D4.14	3033.18	2817.05	3249.31	1.15345	0.205951	0.28827	0.485239	NA	NA	NA	NA	NA	NA	NA
SPAC1F12.02c	8925.82	11960.9	5890.75	0.4925	-1.0218	6.90157e-07	1.2371e-05	NA	1	1	NA	NA	NA	NA
SPAC1F12.03c	9.11429	15.1168	3.1118	0.205851	-2.28033	0.0480243	0.130631	NA	NA	NA	NA	NA	NA	NA
SPAC1F12.04c	288.38	357.11	219.651	0.615079	-0.701156	0.0108998	0.041907	NA	NA	1	NA	NA	NA	NA
SPAC1F12.05	916.55	1024.04	809.058	0.790062	-0.339962	0.108777	0.240902	NA	NA	NA	1	NA	NA	NA
SPAC1F12.06c	189.322	206.363	172.28	0.834838	-0.260432	0.361195	0.562139	NA	NA	NA	NA	NA	NA	NA
SPAC1F12.07	2021.9	2648.87	1394.92	0.52661	-0.925193	9.55718e-06	0.000118332	NA	NA	1	NA	NA	NA	NA
SPAC1F12.08	204.356	201.238	207.474	1.03099	0.0440309	0.872791	0.958264	NA	NA	NA	NA	NA	NA	NA
SPAC1F12.09	376.759	336.33	417.187	1.24041	0.310816	0.24861	0.435588	NA	NA	NA	NA	NA	NA	NA
SPAC1F12.10c	380.132	490.172	270.091	0.551014	-0.85984	0.000911377	0.00565782	NA	NA	1	NA	NA	NA	NA
SPAC1F3.01	1603.9	1935.78	1272.01	0.657105	-0.605805	0.00444344	0.0204317	NA	NA	1	NA	NA	NA	NA
SPAC1F3.02c	1171.71	823.862	1519.56	1.84443	0.883179	0.000641729	0.00425655	NA	NA	1	NA	NA	NA	NA
SPAC1F3.03	1210.9	884.71	1537.08	1.73739	0.796918	0.00018884	0.00150487	NA	NA	1	NA	NA	NA	NA
SPAC1F3.04c	411.765	386.579	436.951	1.1303	0.176709	0.486597	0.679959	NA	NA	NA	NA	NA	NA	NA
SPAC1F3.05	1148.81	1096.47	1201.16	1.09548	0.131561	0.543481	0.728053	NA	NA	NA	NA	NA	NA	NA
SPAC1F3.06c	8322.72	8416.26	8229.19	0.977774	-0.0324278	0.859522	0.951023	NA	NA	NA	NA	NA	NA	NA
SPAC1F3.07c	549.351	633.306	465.396	0.734869	-0.444442	0.0591138	0.153788	NA	NA	NA	NA	NA	NA	NA
SPAC1F3.08c	0.340499	0	0.680999	Inf	Inf	1	1	NA	NA	NA	NA	NA	NA	NA
SPAC1F3.09	1937.19	1563.28	2311.1	1.47837	0.564007	0.0066356	0.0283305	NA	NA	1	1	NA	NA	NA
SPAC1F3.10c	452.005	346.94	557.071	1.60567	0.683177	0.0206095	0.0685891	NA	NA	NA	NA	NA	NA	NA
SPAC1F5.02	6163.95	5905.52	6422.38	1.08752	0.121043	0.522655	0.710692	NA	NA	NA	NA	NA	NA	NA
SPAC1F5.03c	1327.52	1371.83	1283.2	0.935398	-0.0963477	0.613055	0.781633	NA	NA	NA	NA	NA	NA	NA
SPAC1F5.04c	2130.69	2095.83	2165.55	1.03327	0.0472126	0.828731	0.932653	NA	NA	NA	NA	NA	NA	NA
SPAC1F5.05c	279.46	295.521	263.398	0.8913	-0.166017	0.584594	0.763317	NA	NA	NA	NA	NA	NA	NA
SPAC1F5.06	5171.04	5038.83	5303.25	1.05248	0.0737882	0.737037	0.872028	NA	NA	NA	NA	NA	NA	NA
SPAC1F5.07c	531.888	437.47	626.306	1.43166	0.517685	0.0251248	0.0796512	NA	NA	NA	NA	NA	NA	NA
SPAC1F5.08c	400.646	376.076	425.217	1.13067	0.177174	0.499894	0.691021	NA	NA	NA	NA	NA	NA	NA
SPAC1F5.09c	139.957	133.086	146.827	1.10325	0.141758	0.762882	0.890487	NA	NA	NA	NA	NA	NA	NA
SPAC1F5.10	524.699	658.609	390.789	0.593356	-0.753031	0.00151729	0.00869288	NA	NA	1	NA	NA	NA	NA
SPAC1F5.11c	4171.12	4310.39	4031.86	0.935382	-0.0963725	0.643421	0.802311	NA	NA	NA	NA	NA	NA	NA
SPAC1F7.01c	6088.59	6153.23	6023.96	0.978991	-0.0306327	0.884604	0.967393	NA	NA	NA	NA	NA	NA	NA
SPAC1F7.02c	2368.74	3393.2	1344.29	0.396171	-1.3358	7.93962e-11	3.25671e-09	NA	1	1	NA	NA	1	NA
SPAC1F7.03	2006.77	1518.85	2494.68	1.64248	0.715876	0.00189947	0.0104785	NA	NA	1	NA	NA	NA	NA
SPAC1F7.04	3705.04	3892.34	3517.75	0.903762	-0.145985	0.501994	0.69266	NA	NA	NA	NA	NA	NA	NA
SPAC1F7.05	9170.95	10570.9	7770.97	0.735127	-0.443935	0.0170335	0.0591019	NA	NA	NA	NA	NA	NA	NA
SPAC1F7.06	80.1638	13.4759	146.852	10.8973	3.44591	0.0546394	0.144738	NA	NA	NA	NA	NA	NA	NA
SPAC1F7.07c	1575.65	993.142	2158.15	2.17306	1.11973	0.0435032	0.121446	NA	NA	NA	NA	NA	NA	NA
SPAC1F7.08	2854.4	1833.15	3875.66	2.11421	1.08012	0.000744418	0.00479497	1	NA	1	NA	NA	NA	NA
SPAC1F7.09c	492.864	360.285	625.442	1.73596	0.795737	0.00487906	0.021923	NA	NA	1	NA	NA	NA	NA
SPAC1F7.10	154.714	157.041	152.386	0.970357	-0.0434119	0.943906	0.994594	NA	NA	NA	NA	NA	NA	NA
SPAC1F7.11c	966.716	1034.13	899.299	0.869617	-0.201549	0.373925	0.57645	NA	NA	NA	NA	NA	NA	1
SPAC1F7.12	955.31	590.758	1319.86	2.23419	1.15975	6.75033e-05	0.000629466	1	NA	1	NA	NA	NA	NA
SPAC1F7.13c	5090.55	7199.69	2981.4	0.414101	-1.27194	2.28503e-05	0.000247212	NA	1	1	NA	NA	1	NA
SPAC1F7.14c	27.3697	40.2492	14.4902	0.360012	-1.47388	0.0230422	0.0747141	NA	NA	NA	NA	NA	NA	NA
SPAC1F8.01	5262.66	37.6335	10487.7	278.68	8.12246	3.6043e-148	8.0329e-145	1	NA	1	NA	NA	NA	NA
SPAC1F8.02c	51.5235	0	103.047	Inf	Inf	0.0457689	0.126294	NA	NA	NA	NA	NA	NA	NA
SPAC1F8.03c	1091.88	308.436	1875.32	6.0801	2.60409	0.0379925	0.109585	NA	NA	NA	NA	NA	NA	NA
SPAC1F8.04c	121.407	16.9201	225.894	13.3506	3.73884	0.0220521	0.0722747	NA	NA	NA	NA	NA	NA	NA
SPAC1F8.05	1798.47	38.9413	3558	91.3681	6.51362	7.21417e-09	1.96073e-07	1	NA	1	NA	NA	NA	NA
SPAC1F8.06	197.862	232.804	162.92	0.699817	-0.514951	0.072074	0.17671	NA	NA	NA	NA	NA	NA	NA
SPAC1F8.07c	66712.2	101314	32109.9	0.316933	-1.65775	5.97343e-13	3.73256e-11	NA	1	1	NA	NA	NA	NA
SPAC1F8.08	64.4162	96.7847	32.0478	0.331125	-1.59455	0.00027743	0.00207483	NA	1	1	NA	NA	NA	NA
SPAC20G4.01	352.634	417.747	287.52	0.688264	-0.538966	0.0380538	0.109714	NA	NA	NA	NA	NA	NA	NA
SPAC20G4.02c	487.215	222.788	751.643	3.37381	1.75438	0.0021424	0.0115517	1	NA	1	NA	NA	NA	NA
SPAC20G4.03c	942.171	305.585	1578.76	5.16634	2.36914	3.54339e-25	8.16934e-23	1	NA	1	NA	NA	NA	NA
SPAC20G4.04c	107.193	127.815	86.5721	0.677326	-0.562079	0.11635	0.251752	NA	NA	NA	NA	NA	NA	NA
SPAC20G4.05c	622.216	263.874	980.559	3.71602	1.89376	0.000128106	0.00108283	1	NA	1	NA	NA	NA	NA
SPAC20G4.06c	3018.18	2975.28	3061.08	1.02884	0.0410152	0.821997	0.928754	NA	NA	NA	NA	NA	NA	NA
SPAC20G4.07c	1199.73	1437.75	961.71	0.668901	-0.580135	0.00685856	0.0290966	NA	NA	1	NA	NA	NA	NA
SPAC20G4.08	2425.98	2017.85	2834.11	1.40452	0.490081	0.0142486	0.0513009	NA	NA	NA	NA	NA	NA	NA
SPAC20G4.09	0.507109	0.657949	0.356268	0.541482	-0.885015	1	1	NA	NA	NA	NA	NA	NA	NA
SPAC20G8.01	1173.78	1079.16	1268.4	1.17536	0.2331	0.262901	0.454319	NA	NA	NA	NA	NA	NA	NA
SPAC20G8.02	1033.95	782.321	1285.58	1.64329	0.716589	0.000870466	0.0054596	NA	NA	1	NA	NA	NA	NA
SPAC20G8.03	5795.82	3362.71	8228.93	2.44711	1.29108	5.64911e-11	2.42115e-09	1	NA	1	NA	NA	NA	NA
SPAC20G8.04c	2199.32	2378.22	2020.41	0.849549	-0.235231	0.236267	0.420337	NA	NA	NA	NA	NA	NA	NA
SPAC20G8.05c	1834.33	2062.59	1606.07	0.778663	-0.360928	0.0679498	0.169393	NA	NA	NA	NA	NA	NA	NA
SPAC20G8.06	4797.24	4842.11	4752.38	0.981469	-0.0269849	0.916483	0.980574	NA	NA	NA	NA	NA	NA	NA
SPAC20G8.07c	482.766	663.613	301.919	0.454963	-1.13618	0.000685074	0.004495	NA	1	1	NA	NA	NA	NA
SPAC20G8.08c	748.967	986.321	511.613	0.518709	-0.947004	2.89281e-05	0.000304109	NA	NA	1	NA	NA	NA	NA
SPAC20G8.09c	2730.95	3966.1	1495.81	0.377148	-1.4068	1.34778e-09	4.43905e-08	NA	1	1	NA	NA	NA	NA
SPAC20G8.10c	178.392	148.048	208.735	1.40991	0.495602	0.185286	0.352639	NA	NA	NA	NA	NA	NA	NA
SPAC20H4.01	1437.87	1916.33	959.411	0.500651	-0.998122	2.31254e-06	3.53005e-05	NA	NA	1	NA	NA	1	NA
SPAC20H4.02	592.229	466.46	717.998	1.53925	0.622228	0.00899246	0.0358519	NA	NA	1	NA	NA	NA	NA
SPAC20H4.03c	422.136	491.772	352.499	0.716793	-0.480371	0.184	0.350892	NA	NA	NA	NA	NA	NA	NA
SPAC20H4.04	452.357	471.163	433.55	0.920168	-0.12003	0.637785	0.798097	NA	NA	NA	NA	NA	NA	NA
SPAC20H4.05c	224.204	266.644	181.764	0.681672	-0.552851	0.0501627	0.13536	NA	NA	NA	NA	NA	NA	NA
SPAC20H4.06c	301.855	302.311	301.399	0.99698	-0.00436294	0.946566	0.995403	NA	NA	NA	NA	NA	1	NA
SPAC20H4.07	199.362	220.343	178.381	0.809561	-0.304789	0.256006	0.445894	NA	NA	NA	NA	NA	NA	NA
SPAC20H4.08	243.098	312.977	173.22	0.553459	-0.853451	0.00182745	0.0101397	NA	NA	1	NA	NA	NA	NA
SPAC20H4.09	456.464	421.216	491.712	1.16737	0.223256	0.353677	0.555743	NA	NA	NA	NA	NA	NA	NA
SPAC20H4.10	2045.3	1881.42	2209.18	1.17421	0.231688	0.259191	0.450001	NA	NA	NA	NA	NA	NA	NA
SPAC20H4.11c	244.617	76.2579	412.976	5.41552	2.4371	0.00634041	0.027385	1	NA	1	NA	NA	NA	NA
SPAC212.01c	0	0	0	NA	NA	NA	NA	NA	NA	NA	NA	NA	NA	NA
SPAC212.02	0	0	0	NA	NA	NA	NA	NA	NA	NA	NA	NA	NA	NA
SPAC212.03	0	0	0	NA	NA	NA	NA	NA	NA	NA	NA	NA	NA	NA
SPAC212.04c	10.7072	13.3054	8.10891	0.609445	-0.714433	0.53457	0.720301	NA	NA	NA	NA	NA	NA	NA
SPAC212.05c	0	0	0	NA	NA	NA	NA	NA	NA	NA	NA	NA	NA	NA
SPAC212.06c	0	0	0	NA	NA	NA	NA	NA	NA	NA	NA	NA	NA	NA
SPAC212.07c	0	0	0	NA	NA	NA	NA	NA	NA	NA	NA	NA	NA	NA
SPAC212.08c	0.588348	0.820429	0.356268	0.434246	-1.20342	1	1	NA	NA	NA	NA	NA	NA	NA
SPAC212.09c	0.356268	0	0.712536	Inf	Inf	1	1	NA	NA	NA	NA	NA	NA	NA
SPAC212.10	0	0	0	NA	NA	NA	NA	NA	NA	NA	NA	NA	NA	NA
SPAC212.11	0	0	0	NA	NA	NA	NA	NA	NA	NA	NA	NA	NA	NA
SPAC212.12	0	0	0	NA	NA	NA	NA	NA	NA	NA	NA	NA	NA	NA
SPAC21E11.03c	600.352	453.74	746.965	1.64624	0.719175	0.0504074	0.135951	NA	NA	NA	NA	NA	1	1
SPAC21E11.04	173.961	152.776	195.146	1.27733	0.353135	0.242546	0.427776	NA	NA	NA	NA	NA	NA	NA
SPAC21E11.05c	519.69	513.102	526.279	1.02568	0.0365826	0.918929	0.981673	NA	NA	NA	NA	NA	NA	NA
SPAC21E11.06	1855.49	2076.16	1634.81	0.787422	-0.344791	0.0952669	0.218359	NA	NA	NA	NA	NA	1	NA
SPAC21E11.07	188.659	177.568	199.75	1.12492	0.169824	0.524741	0.712401	NA	NA	NA	NA	NA	NA	NA
SPAC21E11.08	3231.23	2716.89	3745.58	1.37863	0.463232	0.018861	0.063818	NA	NA	NA	NA	NA	NA	NA
SPAC222.03c	273.17	325.462	220.877	0.678657	-0.559245	0.034981	0.102896	NA	NA	NA	NA	NA	NA	NA
SPAC222.04c	227.836	233.291	222.381	0.953233	-0.0690999	0.807191	0.920969	NA	NA	NA	NA	NA	NA	NA
SPAC222.05c	355.162	352.227	358.098	1.01667	0.0238474	0.931669	0.988438	NA	NA	NA	1	NA	NA	NA
SPAC222.06	819.637	1193.01	446.262	0.374064	-1.41864	1.10333e-05	0.000133397	NA	1	1	NA	NA	NA	NA
SPAC222.07c	826.3	872.689	779.91	0.893687	-0.162159	0.458289	0.655568	NA	NA	NA	NA	NA	NA	NA
SPAC222.08c	282.469	385.75	179.188	0.464518	-1.1062	3.80131e-05	0.000389212	NA	1	1	NA	NA	NA	NA
SPAC222.09	2740.69	3150.45	2330.93	0.73987	-0.434656	0.032888	0.0979027	NA	NA	NA	NA	NA	1	NA
SPAC222.10c	705.23	686.802	723.659	1.05366	0.0754144	0.821723	0.928754	NA	NA	NA	NA	NA	NA	NA
SPAC222.11	2109.91	2015.95	2203.87	1.09321	0.128575	0.522781	0.710719	NA	NA	NA	NA	NA	NA	NA
SPAC222.12c	15859.5	9944.09	21774.9	2.18973	1.13075	0.000471173	0.00330764	1	NA	1	NA	NA	NA	NA
SPAC222.13c	783.741	596.834	970.649	1.62633	0.70162	0.0015261	0.00870608	NA	NA	1	NA	NA	NA	NA
SPAC222.14c	1677.84	1552.66	1803.01	1.16124	0.215669	0.343816	0.544987	NA	NA	NA	NA	NA	NA	NA
SPAC222.15	17.5344	7.72488	27.3439	3.53972	1.82363	0.041532	0.117215	NA	NA	NA	NA	NA	NA	NA
SPAC222.16c	133.871	133.72	134.021	1.00225	0.00324568	0.992759	1	NA	NA	NA	NA	NA	NA	NA
SPAC222.17	124.21	101.683	146.736	1.44307	0.529142	0.114967	0.250077	NA	NA	NA	NA	NA	NA	NA
SPAC222.18	274.313	295.261	253.365	0.858108	-0.220769	0.403267	0.604494	NA	NA	NA	NA	NA	1	NA
SPAC222.19	70.5895	60.2886	80.8905	1.34172	0.424086	0.314883	0.514015	NA	NA	NA	NA	NA	NA	NA
SPAC227.01c	163.564	194.488	132.64	0.681998	-0.55216	0.0899291	0.2087	NA	NA	NA	NA	NA	NA	NA
SPAC227.02c	260.959	364.752	157.166	0.430884	-1.21463	7.28662e-06	9.35093e-05	NA	1	1	NA	NA	NA	NA
SPAC227.03c	166.481	114.672	218.291	1.90362	0.928745	0.00319554	0.0158732	NA	NA	1	NA	NA	NA	NA
SPAC227.04	119.882	95.7616	144.003	1.50376	0.588576	0.0790598	0.18946	NA	NA	NA	NA	NA	NA	NA
SPAC227.05	476.76	590.302	363.219	0.615309	-0.700616	0.00302329	0.01513	NA	NA	1	NA	NA	NA	NA
SPAC227.06	999.961	828.426	1171.5	1.41412	0.499908	0.0264765	0.0830309	NA	NA	NA	NA	NA	NA	NA
SPAC227.07c	1678.12	1711.84	1644.4	0.960604	-0.0579857	0.788821	0.909655	NA	NA	NA	NA	NA	NA	NA
SPAC227.08c	168.08	144.394	191.767	1.32809	0.409348	0.176099	0.340253	NA	NA	NA	NA	NA	NA	NA
SPAC227.09	362.675	433.522	291.827	0.673154	-0.570991	0.0262147	0.0825196	NA	NA	NA	NA	NA	NA	NA
SPAC227.10	350.138	384.882	315.393	0.819455	-0.287263	0.296273	0.493572	NA	NA	NA	NA	NA	NA	NA
SPAC227.11c	638.488	494.314	782.661	1.58333	0.662961	0.003417	0.0167003	NA	NA	1	NA	NA	NA	NA
SPAC227.12	302.348	334.105	270.59	0.809894	-0.304195	0.310143	0.508488	NA	NA	NA	NA	NA	NA	NA
SPAC227.13c	2834.29	1894.4	3774.19	1.99228	0.994424	0.0104779	0.0405176	NA	NA	1	NA	NA	NA	NA
SPAC227.14	1054.67	534.198	1575.14	2.94861	1.56004	1.89114e-09	5.99251e-08	1	NA	1	NA	NA	NA	NA
SPAC227.15	3633.2	1944.13	5322.28	2.73762	1.45292	9.58215e-07	1.64272e-05	1	NA	1	NA	NA	NA	NA
SPAC227.16c	241.459	256.588	226.331	0.88208	-0.181019	0.564894	0.746544	NA	NA	NA	NA	NA	NA	NA
SPAC227.17c	232.359	250.528	214.19	0.854954	-0.226082	0.434451	0.632428	NA	NA	NA	NA	1	NA	NA
SPAC227.18	2548.63	3383.57	1713.7	0.506475	-0.981436	1.41803e-06	2.29009e-05	NA	NA	1	NA	NA	NA	NA
SPAC227.19c	42.106	55.033	29.179	0.530209	-0.915368	0.0850738	0.200283	NA	NA	NA	NA	NA	NA	NA
SPAC22A12.01c	556.904	599.359	514.45	0.858333	-0.220391	0.325038	0.525562	NA	NA	NA	NA	NA	NA	NA
SPAC22A12.02c	4.19096	3.93967	4.44226	1.12757	0.17322	0.969567	1	NA	NA	NA	NA	NA	NA	NA
SPAC22A12.03c	238.12	255.962	220.278	0.860588	-0.216605	0.429882	0.627826	NA	NA	NA	NA	NA	NA	NA
SPAC22A12.04c	2137.4	3009.57	1265.23	0.420404	-1.25015	1.76603e-05	0.000197453	NA	1	1	NA	NA	NA	NA
SPAC22A12.05	172.207	249.521	94.8924	0.380298	-1.3948	9.87001e-06	0.000121754	NA	1	1	NA	NA	NA	NA
SPAC22A12.06c	711.089	759.487	662.691	0.87255	-0.19669	0.376381	0.578074	NA	NA	NA	NA	NA	NA	NA
SPAC22A12.07c	4411.41	4071.29	4751.54	1.16708	0.22291	0.241742	0.427024	NA	NA	NA	NA	NA	NA	NA
SPAC22A12.08c	1032.99	746.166	1319.82	1.7688	0.822769	0.000131487	0.00110721	NA	NA	1	NA	NA	NA	NA
SPAC22A12.09c	478.294	472.528	484.06	1.02441	0.0347886	0.940962	0.993254	NA	NA	NA	NA	NA	1	NA
SPAC22A12.10	1365.52	1622.96	1108.08	0.682752	-0.550567	0.00873717	0.0351484	NA	NA	1	NA	NA	NA	NA
SPAC22A12.11	6232.72	2155.98	10309.5	4.78181	2.25756	3.8483e-07	7.28888e-06	1	NA	1	NA	NA	NA	NA
SPAC22A12.12c	342.615	388.374	296.856	0.764355	-0.387686	0.125506	0.265688	NA	NA	NA	NA	NA	1	NA
SPAC22A12.13	137.226	150.145	124.307	0.827917	-0.272442	0.443489	0.641534	NA	NA	NA	NA	NA	NA	NA
SPAC22A12.14c	846.886	953.277	740.494	0.776788	-0.364407	0.111328	0.244526	NA	NA	NA	NA	NA	NA	NA
SPAC22A12.15c	21754.5	22105.4	21403.7	0.968256	-0.046539	0.828026	0.932331	NA	NA	NA	NA	NA	NA	NA
SPAC22A12.16	5329.03	7137.03	3521.04	0.493348	-1.01932	3.04152e-07	5.91151e-06	NA	1	1	NA	NA	NA	NA
SPAC22A12.17c	48.1412	21.5338	74.7487	3.47123	1.79545	0.0377681	0.109173	NA	NA	NA	NA	NA	NA	NA
SPAC22E12.01	355.188	361.414	348.961	0.965543	-0.0505882	0.872303	0.957986	NA	NA	NA	NA	NA	NA	NA
SPAC22E12.02	443.068	427.137	458.999	1.07459	0.103792	0.666759	0.819928	NA	NA	NA	NA	NA	1	NA
SPAC22E12.03c	1105.92	943.936	1267.91	1.34322	0.425693	0.178721	0.343074	NA	NA	NA	NA	NA	NA	NA
SPAC22E12.04	664.466	681.97	646.963	0.948668	-0.0760249	0.742963	0.87565	NA	NA	NA	NA	NA	NA	NA
SPAC22E12.05c	1168.97	1198.17	1139.77	0.951259	-0.0720901	0.707141	0.854295	NA	NA	NA	NA	NA	NA	NA
SPAC22E12.06c	696.853	673.424	720.282	1.06958	0.0970449	0.686045	0.836719	NA	NA	NA	NA	NA	NA	NA
SPAC22E12.07	1859.11	2407.14	1311.08	0.544665	-0.876559	2.04175e-05	0.000224156	NA	NA	1	NA	NA	NA	NA
SPAC22E12.08	168.272	181.207	155.337	0.857235	-0.222238	0.493481	0.685521	NA	NA	NA	NA	NA	NA	1
SPAC22E12.09c	1933.56	1537.42	2329.69	1.51532	0.599625	0.00353059	0.0171303	NA	NA	1	NA	NA	NA	NA
SPAC22E12.10c	3688.57	3487.37	3889.78	1.11539	0.157549	0.406212	0.606378	NA	NA	NA	NA	NA	NA	NA
SPAC22E12.11c	1972.45	1729.81	2215.09	1.28055	0.356758	0.0909285	0.210145	NA	NA	NA	NA	NA	NA	NA
SPAC22E12.13c	1289.91	1881.66	698.157	0.371033	-1.43038	2.82522e-11	1.27631e-09	NA	1	1	NA	NA	NA	NA
SPAC22E12.14c	1334.05	1510.9	1157.19	0.765896	-0.38478	0.0698723	0.173089	NA	NA	NA	NA	NA	NA	NA
SPAC22E12.16c	2251.02	2310.73	2191.32	0.94832	-0.0765536	0.694761	0.844107	NA	NA	NA	NA	NA	NA	NA
SPAC22E12.17c	2844.21	3028.51	2659.92	0.878293	-0.187225	0.338766	0.539478	NA	NA	NA	NA	NA	NA	NA
SPAC22E12.18	587.862	758.936	416.787	0.549174	-0.864666	0.000243593	0.0018785	NA	NA	1	NA	NA	NA	NA
SPAC22E12.19	1034.41	952.18	1116.65	1.17273	0.229867	0.278042	0.47278	NA	NA	NA	NA	NA	NA	NA
SPAC22F3.02	37.6653	37.4469	37.8836	1.01166	0.0167281	0.940354	0.99324	NA	NA	NA	NA	NA	NA	1
SPAC22F3.03c	163.889	179.582	148.196	0.825228	-0.277135	0.346819	0.54802	NA	NA	NA	NA	NA	NA	NA
SPAC22F3.04	7.20872	8.70779	5.70965	0.655694	-0.608906	0.674246	0.826551	NA	NA	NA	NA	NA	NA	NA
SPAC22F3.05c	846.735	756.645	936.825	1.23813	0.308164	0.142585	0.292431	NA	NA	NA	NA	NA	NA	NA
SPAC22F3.06c	4620.68	4284.25	4957.11	1.15705	0.210456	0.288772	0.485949	NA	NA	NA	NA	NA	NA	NA
SPAC22F3.07c	663.469	579.93	747.008	1.2881	0.365245	0.109953	0.242487	NA	NA	NA	1	NA	NA	NA
SPAC22F3.08c	366.98	533.953	200.006	0.374575	-1.41667	2.47743e-08	6.11221e-07	NA	1	1	NA	NA	NA	NA
SPAC22F3.09c	427.187	282.768	571.606	2.02147	1.0154	6.34057e-05	0.000597927	1	NA	1	NA	NA	NA	1
SPAC22F3.10c	2435.73	3130.22	1741.24	0.556269	-0.846146	3.57194e-05	0.000367415	NA	NA	1	NA	NA	NA	NA
SPAC22F3.11c	157.141	183.367	130.915	0.713952	-0.486101	0.114514	0.249476	NA	NA	NA	NA	NA	NA	NA
SPAC22F3.12c	934.042	181.036	1687.05	9.31885	3.22015	1.13823e-41	6.34183e-39	1	NA	1	NA	NA	NA	NA
SPAC22F3.13	1711.72	1428.73	1994.71	1.39614	0.481446	0.0178172	0.0612788	NA	NA	NA	NA	NA	NA	NA
SPAC22F3.15	127.577	123.542	131.613	1.06533	0.0912971	0.815705	0.925796	NA	NA	NA	NA	NA	NA	NA
SPAC22F8.02c	303.612	230.699	376.526	1.63211	0.706735	0.010829	0.0417067	NA	NA	1	NA	NA	NA	NA
SPAC22F8.03c	0.978436	0.657949	1.29892	1.9742	0.981267	1	1	NA	NA	NA	NA	NA	NA	NA
SPAC22F8.04	1339.26	1004	1674.53	1.66786	0.738001	0.000539338	0.00370602	NA	NA	1	NA	NA	NA	NA
SPAC22F8.05	2754.11	1024.55	4483.67	4.37625	2.12969	5.17763e-05	0.00050463	1	NA	1	NA	NA	NA	NA
SPAC22F8.06	1050.51	972.651	1128.36	1.16009	0.214239	0.293319	0.490896	NA	NA	NA	NA	NA	NA	NA
SPAC22F8.07c	645.198	652.85	637.547	0.97656	-0.0342195	0.904287	0.974229	NA	NA	NA	NA	NA	NA	NA
SPAC22F8.08	3924.36	3381.44	4467.28	1.32112	0.401761	0.0369888	0.107379	NA	NA	NA	NA	NA	NA	NA
SPAC22F8.09	1018.06	1456.14	579.981	0.398299	-1.32808	1.70124e-09	5.49491e-08	NA	1	1	NA	NA	NA	NA
SPAC22F8.10c	827.149	820.913	833.385	1.01519	0.0217525	0.915391	0.980574	NA	NA	NA	NA	NA	1	NA
SPAC22F8.11	792.989	747.181	838.798	1.12262	0.166865	0.463119	0.660498	NA	NA	NA	NA	NA	NA	NA
SPAC22F8.12c	367.616	445.357	289.875	0.650883	-0.61953	0.0155679	0.0549687	NA	NA	NA	NA	NA	NA	NA
SPAC22G7.01c	2369.55	2032.1	2707	1.33212	0.413724	0.0431489	0.120658	NA	NA	NA	NA	NA	NA	NA
SPAC22G7.02	1097.66	1134.48	1060.84	0.935089	-0.0968247	0.597977	0.770097	NA	NA	NA	NA	NA	NA	NA
SPAC22G7.03	24.5664	24.8155	24.3174	0.979926	-0.0292548	0.922787	0.983227	NA	NA	NA	NA	NA	NA	NA
SPAC22G7.04	1289.12	1319.85	1258.39	0.953434	-0.0687946	0.742909	0.87565	NA	NA	NA	NA	NA	NA	NA
SPAC22G7.05	1255.18	1764.51	745.849	0.422695	-1.24231	1.55031e-05	0.000177072	NA	1	1	NA	NA	NA	NA
SPAC22G7.06c	29559.1	41516.2	17602.1	0.423982	-1.23793	2.91799e-10	1.09605e-08	NA	1	1	NA	NA	NA	NA
SPAC22G7.07c	189.064	147.683	230.445	1.5604	0.641915	0.0304211	0.0928746	NA	NA	NA	1	NA	NA	NA
SPAC22G7.08	292.45	236.581	348.32	1.47231	0.558081	0.230055	0.412041	NA	NA	NA	NA	NA	NA	NA
SPAC22G7.09c	1065.59	1196.6	934.582	0.781032	-0.356547	0.103738	0.232282	NA	NA	NA	NA	NA	NA	NA
SPAC22G7.10	1700.17	1881.12	1519.22	0.807614	-0.308261	0.129186	0.271872	NA	NA	NA	NA	NA	NA	NA
SPAC22G7.11c	844.119	30.8915	1657.35	53.6506	5.74552	0.108415	0.240377	NA	NA	NA	NA	NA	NA	NA
SPAC22H10.02	443.197	356.516	529.879	1.48627	0.571696	0.0203255	0.0677788	NA	NA	NA	NA	NA	NA	NA
SPAC22H10.03c	1386.5	1279.63	1493.37	1.16703	0.22284	0.296214	0.493572	NA	NA	NA	NA	NA	NA	NA
SPAC22H10.04	184.355	162.337	206.374	1.27127	0.346272	0.294195	0.49187	NA	NA	NA	NA	NA	NA	NA
SPAC22H10.05c	679.541	711.497	647.585	0.910173	-0.135788	0.56684	0.747808	NA	NA	NA	NA	NA	NA	NA
SPAC22H10.06c	0.162365	0	0.324731	Inf	Inf	1	1	NA	NA	NA	NA	NA	NA	NA
SPAC22H10.07	920.03	740.252	1099.81	1.48572	0.571161	0.00806606	0.0330857	NA	NA	1	NA	NA	NA	NA
SPAC22H10.08	425.222	442.408	408.035	0.922304	-0.116686	0.644452	0.803282	NA	NA	NA	NA	NA	NA	NA
SPAC22H10.09	590.956	670.793	511.119	0.761963	-0.392208	0.169929	0.33175	NA	NA	NA	1	NA	NA	NA
SPAC22H10.10	179.773	198.127	161.419	0.814725	-0.295615	0.330053	0.530337	NA	NA	NA	NA	NA	NA	NA
SPAC22H10.11c	1526.82	1485.6	1568.05	1.0555	0.077926	0.689383	0.839259	NA	NA	NA	NA	NA	NA	NA
SPAC22H10.12c	1904.81	1754.3	2055.33	1.1716	0.228476	0.275043	0.469357	NA	NA	NA	NA	NA	NA	NA
SPAC22H10.13	1165.15	241.917	2088.39	8.63269	3.10981	0.151052	0.304053	NA	NA	NA	NA	NA	NA	NA
SPAC22H12.01c	1278.99	717.206	1840.77	2.56658	1.35985	0.0242952	0.0776274	NA	NA	NA	1	NA	NA	NA
SPAC22H12.02	1001.16	978.751	1023.57	1.04579	0.06459	0.729343	0.866759	NA	NA	NA	NA	NA	NA	NA
SPAC22H12.03	99.4614	84.2756	114.647	1.36038	0.444015	0.234145	0.417798	NA	NA	NA	NA	NA	NA	NA
SPAC22H12.04c	17511.6	23772	11251.2	0.473295	-1.07919	2.15423e-07	4.32527e-06	NA	1	1	NA	NA	NA	NA
SPAC22H12.05c	579.317	396.765	761.868	1.9202	0.941256	0.00125581	0.00744355	NA	NA	1	NA	NA	NA	NA
SPAC23A1.02c	424.727	477.938	371.516	0.777331	-0.363399	0.130412	0.273297	NA	NA	NA	NA	NA	NA	NA
SPAC23A1.03	1656.35	2650.56	662.131	0.249808	-2.00111	3.64288e-18	4.34934e-16	NA	1	1	NA	NA	NA	NA
SPAC23A1.04c	677.66	686.804	668.516	0.973373	-0.0389357	0.932719	0.988938	NA	NA	NA	NA	NA	NA	NA
SPAC23A1.05	501.689	524.872	478.506	0.911661	-0.13343	0.583352	0.762521	NA	NA	NA	NA	NA	NA	NA
SPAC23A1.06c	457.71	431.711	483.71	1.12045	0.164078	0.462486	0.659859	NA	NA	NA	NA	NA	NA	NA
SPAC23A1.07	138.983	189.257	88.7097	0.468727	-1.09318	0.000909137	0.00564916	NA	1	1	NA	NA	NA	NA
SPAC23A1.08c	8694.18	10992.3	6396.04	0.581865	-0.781243	6.77689e-05	0.000631063	NA	NA	1	NA	NA	NA	NA
SPAC23A1.09	559.241	662.695	455.787	0.687778	-0.539986	0.0230631	0.0747455	NA	NA	NA	NA	NA	1	NA
SPAC23A1.10	1185.28	1553.16	817.388	0.526273	-0.926116	1.31173e-05	0.000154678	NA	NA	1	NA	NA	1	NA
SPAC23A1.11	7667.01	10418.8	4915.19	0.471761	-1.08387	4.4885e-05	0.000447245	NA	1	1	NA	NA	NA	NA
SPAC23A1.12c	4664.72	5512.5	3816.93	0.692414	-0.530292	0.00749088	0.031205	NA	NA	1	NA	NA	1	NA
SPAC23A1.14c	1505.39	1094.99	1915.78	1.74959	0.807017	0.000118078	0.00100955	NA	NA	1	NA	NA	NA	NA
SPAC23A1.15c	497.426	430.784	564.068	1.3094	0.388904	0.112008	0.245323	NA	NA	NA	NA	NA	NA	NA
SPAC23A1.16c	256.156	199.312	313	1.5704	0.651132	0.0236162	0.0761319	NA	NA	NA	NA	NA	NA	NA
SPAC23A1.17	5527	3949.26	7104.74	1.79901	0.847201	0.0122492	0.0456541	NA	NA	1	NA	NA	NA	NA
SPAC23A1.18c	552.26	411.029	693.492	1.68721	0.754637	0.00118536	0.00710156	NA	NA	1	NA	NA	NA	NA
SPAC23A1.19c	841.267	986.151	696.384	0.706163	-0.501926	0.0263451	0.082768	NA	NA	NA	NA	NA	NA	NA
SPAC23A1.20	131.412	135.361	127.464	0.941657	-0.0867266	0.825545	0.93068	NA	NA	NA	NA	NA	NA	NA
SPAC23C11.01	409.642	444.252	375.032	0.844187	-0.244365	0.302504	0.500505	NA	NA	NA	NA	NA	NA	NA
SPAC23C11.02c	6033.71	8080.17	3987.25	0.493462	-1.01899	2.85041e-07	5.61895e-06	NA	1	1	NA	NA	NA	NA
SPAC23C11.03	1990.13	2591.8	1388.46	0.535714	-0.900466	1.49023e-05	0.000172085	NA	NA	1	NA	NA	NA	NA
SPAC23C11.04c	437.574	351.732	523.416	1.48811	0.573482	0.0184413	0.0627475	NA	NA	NA	NA	NA	NA	NA
SPAC23C11.05	7706.95	10279.8	5134.08	0.499433	-1.00164	4.07216e-07	7.66942e-06	NA	1	1	NA	NA	NA	NA
SPAC23C11.06c	2077.26	417.308	3737.2	8.9555	3.16277	0.010535	0.040715	1	NA	1	NA	NA	NA	NA
SPAC23C11.07	7.84282	5.92154	9.7641	1.64891	0.721514	0.747063	0.879223	NA	NA	NA	NA	NA	NA	NA
SPAC23C11.08	243.465	190.28	296.65	1.55902	0.640642	0.0300818	0.0920489	NA	NA	NA	NA	1	NA	1
SPAC23C11.09	5192.75	6074.89	4310.61	0.70958	-0.494964	0.0280085	0.0869382	NA	NA	NA	NA	NA	1	NA
SPAC23C11.10	88.5185	83.2927	93.7442	1.12548	0.17054	0.664741	0.81859	NA	NA	NA	NA	NA	NA	NA
SPAC23C11.11	2579.47	2689.01	2469.93	0.918529	-0.122602	0.582234	0.761357	NA	NA	NA	NA	NA	NA	NA
SPAC23C11.12	46.7201	41.2241	52.2161	1.26664	0.341008	0.463922	0.66122	NA	NA	NA	NA	NA	NA	NA
SPAC23C11.13c	919.545	1339.96	499.129	0.372495	-1.42471	8.71997e-11	3.51215e-09	NA	1	1	NA	NA	NA	NA
SPAC23C11.14	1426.53	1606.35	1246.71	0.776109	-0.365669	0.0854046	0.20085	NA	NA	NA	NA	NA	NA	NA
SPAC23C11.15	1380.76	1347.1	1414.41	1.04997	0.0703435	0.726928	0.865479	NA	NA	NA	NA	NA	NA	NA
SPAC23C11.16	836.085	729.531	942.639	1.29212	0.369737	0.0796314	0.190699	NA	NA	NA	NA	NA	NA	NA
SPAC23C11.17	1814.87	1690.01	1939.72	1.14776	0.198818	0.325459	0.525813	NA	NA	NA	NA	NA	NA	NA
SPAC23C4.02	3243.84	3065.53	3422.16	1.11633	0.158769	0.403947	0.604609	NA	NA	NA	NA	NA	NA	NA
SPAC23C4.03	1781.57	1787.15	1775.99	0.993751	-0.00904332	0.929644	0.987782	NA	NA	NA	NA	NA	NA	NA
SPAC23C4.04c	73.3036	71.7826	74.8246	1.04238	0.0598785	0.858447	0.950702	NA	NA	NA	NA	NA	NA	NA
SPAC23C4.05c	1570.23	1281.11	1859.35	1.45136	0.537402	0.00961915	0.0375883	NA	NA	1	NA	NA	NA	NA
SPAC23C4.06c	305.775	457.07	154.48	0.33798	-1.56499	3.70816e-06	5.33177e-05	NA	1	1	1	NA	NA	NA
SPAC23C4.07	26.4664	22.5087	30.4242	1.35167	0.434738	0.546483	0.730611	NA	NA	NA	NA	NA	NA	NA
SPAC23C4.08	539.108	473.406	604.811	1.27757	0.353406	0.108432	0.240377	NA	NA	NA	NA	NA	NA	NA
SPAC23C4.09c	278.47	346.476	210.464	0.60744	-0.719186	0.00728172	0.0305622	NA	NA	1	1	NA	NA	NA
SPAC23C4.10	652.547	638.236	666.858	1.04484	0.0632884	0.770001	0.895902	NA	NA	NA	NA	NA	NA	NA
SPAC23C4.11	475.214	374.565	575.862	1.53741	0.620506	0.00956241	0.0374103	NA	NA	1	NA	NA	NA	NA
SPAC23C4.12	513.506	449.012	578	1.28727	0.364315	0.130312	0.273297	NA	NA	NA	1	NA	NA	NA
SPAC23C4.13	445.365	356.67	534.06	1.49735	0.582409	0.0171447	0.0593703	NA	NA	NA	NA	NA	NA	NA
SPAC23C4.14	423.833	524.548	323.118	0.615994	-0.699012	0.00478333	0.0216383	NA	NA	1	NA	NA	NA	NA
SPAC23C4.15	880.127	1233.58	526.671	0.426944	-1.22788	3.13319e-08	7.50843e-07	NA	1	1	NA	NA	NA	NA
SPAC23C4.16c	658.207	561.206	755.208	1.34569	0.428343	0.061335	0.158324	NA	NA	NA	NA	NA	NA	NA
SPAC23C4.17	668.422	890.991	445.853	0.500401	-0.998842	0.000120293	0.00102527	NA	NA	1	NA	NA	1	NA
SPAC23C4.18c	465.791	436.031	495.55	1.1365	0.184598	0.474415	0.669185	NA	NA	NA	NA	NA	NA	NA
SPAC23C4.19	4177.55	3447.89	4907.2	1.42325	0.509186	0.00872804	0.0351484	NA	NA	1	NA	NA	NA	NA
SPAC23D3.01	356.263	381.632	330.893	0.867046	-0.205819	0.418906	0.617053	NA	NA	NA	NA	NA	NA	NA
SPAC23D3.02	329.518	405.481	253.556	0.625321	-0.677332	0.0074159	0.0309892	NA	NA	1	NA	NA	NA	NA
SPAC23D3.03c	1436.33	1361.54	1511.13	1.10987	0.15039	0.446248	0.64427	NA	NA	NA	NA	NA	NA	NA
SPAC23D3.04c	1897.15	2152.16	1642.15	0.763024	-0.3902	0.0533925	0.142111	NA	NA	NA	NA	NA	NA	NA
SPAC23D3.05c	165.873	147.862	183.885	1.24363	0.314552	0.319034	0.518362	NA	NA	NA	NA	NA	NA	NA
SPAC23D3.06c	4730.52	4590.34	4870.7	1.06108	0.0855304	0.65148	0.809176	NA	NA	NA	NA	NA	NA	NA
SPAC23D3.07	1708.74	1543.69	1873.78	1.21383	0.279566	0.186916	0.355035	NA	NA	NA	NA	NA	NA	NA
SPAC23D3.08	687.648	802.872	572.423	0.712969	-0.488088	0.0308472	0.0937753	NA	NA	NA	NA	NA	1	NA
SPAC23D3.09	630.18	654.173	606.187	0.926645	-0.109911	0.632965	0.795133	NA	NA	NA	1	NA	NA	NA
SPAC23D3.10c	1036.17	824.374	1247.97	1.51384	0.598208	0.00521823	0.0232594	NA	NA	1	NA	NA	NA	NA
SPAC23D3.11	387.65	232.487	542.813	2.33482	1.22331	0.0370191	0.107379	NA	NA	NA	1	NA	NA	NA
SPAC23D3.12	4790.73	3226.1	6355.37	1.96998	0.978184	7.73258e-07	1.36053e-05	NA	NA	1	NA	NA	NA	NA
SPAC23D3.13c	1394.72	1383.89	1405.56	1.01565	0.0224104	0.896634	0.973172	NA	NA	NA	NA	NA	NA	NA
SPAC23D3.14c	254.457	149.039	359.875	2.41463	1.2718	0.0399975	0.114088	NA	NA	NA	NA	NA	NA	NA
SPAC23D3.16	74.6019	86.0789	63.1249	0.733338	-0.447451	0.290393	0.487708	NA	NA	NA	NA	NA	NA	NA
SPAC23D3.17	418.733	231.285	606.18	2.62092	1.39008	0.0511487	0.137286	NA	NA	NA	NA	NA	NA	NA
SPAC23E2.01	1234.06	1537.69	930.438	0.605088	-0.724783	0.000614972	0.0041117	NA	NA	1	NA	NA	NA	1
SPAC23E2.02	936.593	834.461	1038.72	1.24478	0.315895	0.162205	0.320479	NA	NA	NA	NA	NA	NA	NA
SPAC23E2.03c	1578.28	188.314	2968.25	15.7622	3.9784	1.12543e-05	0.000135824	1	NA	1	NA	NA	NA	NA
SPAC23G3.01	4625.55	4403.64	4847.47	1.10079	0.138534	0.496625	0.688458	NA	NA	NA	NA	NA	1	NA
SPAC23G3.02c	3899.49	3128.62	4670.36	1.49279	0.578009	0.0839834	0.198258	NA	NA	NA	NA	NA	NA	NA
SPAC23G3.03	932.912	670.305	1195.52	1.78354	0.834746	0.000841612	0.00529851	NA	NA	1	NA	NA	NA	NA
SPAC23G3.04	251.588	284.408	218.768	0.769202	-0.378565	0.151072	0.304053	NA	NA	NA	NA	NA	NA	NA
SPAC23G3.05c	241.174	279.145	203.203	0.727947	-0.458094	0.086931	0.203369	NA	NA	NA	NA	NA	NA	NA
SPAC23G3.06	7281.01	9553.63	5008.39	0.52424	-0.931702	2.42884e-06	3.67404e-05	NA	NA	1	NA	NA	1	NA
SPAC23G3.07c	477.316	453.918	500.713	1.10309	0.14155	0.548004	0.731993	NA	NA	NA	NA	NA	NA	NA
SPAC23G3.08c	1169.93	1191.12	1148.74	0.96442	-0.0522662	0.789588	0.910047	NA	NA	NA	NA	NA	NA	NA
SPAC23G3.09	678.194	601.423	754.965	1.2553	0.328029	0.138253	0.285983	NA	NA	NA	NA	NA	NA	NA
SPAC23G3.10c	932.247	1043.65	820.84	0.786507	-0.346469	0.117814	0.25369	NA	NA	NA	NA	NA	NA	NA
SPAC23G3.11	1086.27	1036.66	1135.88	1.09571	0.13187	0.55144	0.734447	NA	NA	NA	NA	NA	NA	NA
SPAC23G3.12c	3361.94	4327.71	2396.18	0.553682	-0.852869	2.07019e-05	0.000226165	NA	NA	1	NA	NA	NA	NA
SPAC23H3.02c	302.609	366.955	238.264	0.649301	-0.62304	0.0250001	0.0793688	NA	NA	NA	NA	NA	NA	NA
SPAC23H3.03c	402.171	396.627	407.716	1.02796	0.039783	0.936758	0.990657	NA	NA	NA	NA	NA	NA	NA
SPAC23H3.04	80.8143	64.7317	96.8969	1.4969	0.581978	0.155637	0.311218	NA	NA	NA	NA	NA	NA	NA
SPAC23H3.05c	411.69	462.911	360.469	0.7787	-0.36086	0.162888	0.321545	NA	NA	NA	NA	NA	NA	NA
SPAC23H3.06	984.542	1000.18	968.907	0.968734	-0.0458275	0.820187	0.928665	NA	NA	NA	NA	NA	NA	NA
SPAC23H3.07c	416.313	437.779	394.847	0.901933	-0.148907	0.582508	0.761566	NA	NA	NA	NA	NA	NA	NA
SPAC23H3.08c	87.8543	85.429	90.2796	1.05678	0.0796741	0.866711	0.954914	NA	NA	NA	NA	NA	NA	NA
SPAC23H3.09c	2029.01	3087.75	970.263	0.314229	-1.67011	1.67187e-15	1.4331e-13	NA	1	1	NA	NA	NA	NA
SPAC23H3.10	733.908	817.152	650.663	0.796257	-0.328694	0.139662	0.28811	NA	NA	NA	NA	NA	NA	NA
SPAC23H3.11c	176.702	229.327	124.077	0.541049	-0.886169	0.00439408	0.0202752	NA	NA	1	NA	NA	NA	NA
SPAC23H3.12c	48.13	53.2216	43.0384	0.808664	-0.306387	0.588243	0.765222	NA	NA	NA	NA	NA	NA	NA
SPAC23H3.13c	2729.26	1896.59	3561.93	1.87807	0.909255	0.000481526	0.00336711	NA	NA	1	NA	NA	NA	NA
SPAC23H3.14	436.458	445.016	427.901	0.96154	-0.0565812	0.851001	0.947165	NA	NA	NA	NA	NA	NA	NA
SPAC23H3.15c	5403.49	242.843	10564.1	43.5019	5.44301	0.00261579	0.013526	1	NA	1	NA	NA	NA	NA
SPAC23H4.01c	2314.83	1602.35	3027.31	1.88929	0.917848	6.8944e-06	8.94327e-05	NA	NA	1	NA	NA	NA	NA
SPAC23H4.02	758.115	656.123	860.106	1.31089	0.390548	0.0726857	0.178014	NA	NA	NA	NA	NA	NA	NA
SPAC23H4.03c	2155.57	2136.81	2174.33	1.01756	0.0251094	0.893586	0.973172	NA	NA	NA	NA	NA	NA	NA
SPAC23H4.04	347.165	485.753	208.578	0.429392	-1.21963	2.73782e-06	4.09454e-05	NA	1	1	NA	NA	1	NA
SPAC23H4.05c	14.0485	20.5428	7.55406	0.367722	-1.44331	0.0962862	0.219867	NA	NA	NA	NA	NA	NA	NA
SPAC23H4.06	2386.31	3776.42	996.202	0.263795	-1.92251	1.72249e-08	4.30152e-07	NA	1	1	NA	NA	NA	NA
SPAC23H4.07c	403.853	452.294	355.412	0.7858	-0.347766	0.148257	0.300014	NA	NA	NA	NA	NA	NA	NA
SPAC23H4.08	281.024	289.347	272.702	0.942474	-0.0854755	0.688602	0.83881	NA	NA	NA	NA	NA	NA	NA
SPAC23H4.09	2268.6	2757.15	1780.04	0.64561	-0.631264	0.00593603	0.0258893	NA	NA	1	NA	NA	NA	NA
SPAC23H4.10c	841.555	979.449	703.661	0.718425	-0.47709	0.0315876	0.0950846	NA	NA	NA	NA	NA	NA	NA
SPAC23H4.11c	115.661	135.206	96.1154	0.710879	-0.492324	0.16169	0.319745	NA	NA	NA	NA	NA	NA	NA
SPAC23H4.12	797.739	939.109	656.369	0.698927	-0.516786	0.0172912	0.0598166	NA	NA	NA	NA	NA	NA	NA
SPAC23H4.13c	224.645	224.591	224.698	1.00048	0.000685877	0.978615	1	NA	NA	NA	NA	NA	NA	NA
SPAC23H4.14	912.465	805.73	1019.2	1.26494	0.339067	0.140216	0.288723	NA	NA	NA	NA	NA	NA	NA
SPAC23H4.15	2054.33	3013.2	1095.47	0.363557	-1.45975	1.60817e-12	9.03547e-11	NA	1	1	NA	NA	NA	NA
SPAC23H4.16c	258.695	282.906	234.484	0.828842	-0.270831	0.314974	0.514015	NA	NA	NA	NA	NA	NA	NA
SPAC23H4.17c	186.889	194.837	178.941	0.918416	-0.12278	0.71471	0.858965	NA	NA	NA	NA	NA	NA	NA
SPAC23H4.18c	198.649	188.907	208.391	1.10314	0.141616	0.587333	0.765222	NA	NA	NA	NA	NA	NA	NA
SPAC23H4.21	58.5906	64.5773	52.6039	0.814589	-0.295856	0.483282	0.677278	NA	NA	NA	NA	NA	NA	NA
SPAC24B11.05	583.76	438.33	729.19	1.66356	0.734276	0.0185216	0.0629287	NA	NA	NA	NA	NA	NA	NA
SPAC24B11.06c	1125.71	1303.96	947.452	0.726596	-0.460774	0.0289328	0.089063	NA	NA	NA	NA	NA	NA	NA
SPAC24B11.07c	995.994	1060.91	931.073	0.877614	-0.188341	0.397261	0.599742	NA	NA	NA	NA	NA	NA	NA
SPAC24B11.08c	912.506	733.202	1091.81	1.4891	0.57444	0.00855545	0.0345839	NA	NA	1	NA	NA	NA	NA
SPAC24B11.09	1229.49	1266.29	1192.69	0.941877	-0.0863898	0.704301	0.852074	NA	NA	NA	NA	NA	NA	NA
SPAC24B11.10c	1294.78	1371.73	1217.82	0.887799	-0.171696	0.43347	0.631824	NA	NA	NA	NA	NA	NA	NA
SPAC24B11.11c	1002.24	817.948	1186.53	1.45062	0.536669	0.01225	0.0456541	NA	NA	1	NA	NA	NA	NA
SPAC24B11.12c	4089.94	3002.11	5177.76	1.72471	0.786351	6.51494e-05	0.000610069	NA	NA	1	NA	NA	NA	NA
SPAC24B11.13	1880.54	2154.53	1606.56	0.745663	-0.423403	0.368971	0.571073	NA	NA	NA	NA	NA	NA	NA
SPAC24B11.14	5.8739	7.72488	4.02292	0.520774	-0.941271	0.514048	0.702848	NA	NA	NA	NA	NA	NA	NA
SPAC24C9.02c	387.042	313.627	460.458	1.46817	0.55402	0.0270688	0.0845315	NA	NA	NA	NA	NA	NA	NA
SPAC24C9.03	1494.43	1809.37	1179.49	0.65188	-0.617321	0.0034106	0.0166812	NA	NA	1	NA	NA	NA	NA
SPAC24C9.04	328.266	352.771	303.76	0.86107	-0.215798	0.345521	0.546667	NA	NA	NA	NA	NA	NA	NA
SPAC24C9.05c	958.746	934.642	982.85	1.05158	0.0725577	0.75356	0.882441	NA	NA	NA	NA	NA	NA	NA
SPAC24C9.06c	15197.1	8099.11	22295.1	2.75279	1.46089	6.65726e-14	4.78607e-12	1	NA	1	NA	NA	NA	NA
SPAC24C9.07c	967.094	750.764	1183.43	1.5763	0.656538	0.00225896	0.0120442	NA	NA	1	NA	NA	NA	NA
SPAC24C9.08	1896.69	1290.51	2502.87	1.93945	0.955646	0.0112884	0.0430104	NA	NA	1	NA	NA	NA	NA
SPAC24C9.09	481.194	437.819	524.57	1.19814	0.260802	0.273555	0.467533	NA	NA	NA	NA	NA	NA	NA
SPAC24C9.10c	472.021	409.713	534.328	1.30415	0.383111	0.107357	0.238626	NA	NA	NA	NA	NA	1	NA
SPAC24C9.11	642.171	716.412	567.931	0.792743	-0.335074	0.153887	0.308606	NA	NA	NA	NA	NA	1	NA
SPAC24C9.12c	6560.6	7583.1	5538.11	0.730323	-0.453393	0.0289171	0.0890555	NA	NA	NA	NA	NA	NA	NA
SPAC24C9.13c	345.655	279.43	411.88	1.474	0.559741	0.0257953	0.0814292	NA	NA	NA	NA	NA	NA	NA
SPAC24C9.14	963.498	756.88	1170.12	1.54598	0.628517	0.00385278	0.0182563	NA	NA	1	NA	NA	NA	NA
SPAC24C9.15c	45.7201	22.1676	69.2726	3.12494	1.64383	0.00148675	0.0085841	1	NA	1	NA	NA	NA	NA
SPAC24C9.16c	355.258	272.85	437.666	1.60405	0.681723	0.0756734	0.183516	NA	NA	NA	NA	NA	NA	NA
SPAC24H6.01c	334.954	309.16	360.749	1.16687	0.222645	0.365221	0.567085	NA	NA	NA	NA	NA	NA	NA
SPAC24H6.02c	94.9132	108.58	81.2468	0.748269	-0.41837	0.303721	0.501649	NA	NA	NA	NA	NA	NA	NA
SPAC24H6.03	682.372	606.849	757.894	1.2489	0.320658	0.151254	0.304307	NA	NA	NA	1	NA	NA	NA
SPAC24H6.04	6740.59	5548.36	7932.82	1.42976	0.515772	0.00849263	0.0344132	NA	NA	1	NA	NA	NA	NA
SPAC24H6.05	1223.01	943.659	1502.36	1.59206	0.670896	0.00154186	0.00877353	NA	NA	1	NA	NA	NA	NA
SPAC24H6.06	752.794	785.107	720.48	0.917684	-0.123931	0.592502	0.767099	NA	NA	NA	NA	NA	NA	NA
SPAC24H6.07	6529.24	8576.18	4482.29	0.522644	-0.936099	1.17777e-05	0.000141121	NA	NA	1	NA	NA	1	NA
SPAC24H6.08	172.801	200.125	145.478	0.726936	-0.460099	0.124026	0.263752	NA	NA	NA	NA	NA	NA	NA
SPAC24H6.09	1527.72	1407.34	1648.11	1.17108	0.22784	0.284623	0.480917	NA	NA	NA	NA	NA	NA	NA
SPAC24H6.10c	3239.54	4626.55	1852.52	0.400411	-1.32045	1.09325e-10	4.29968e-09	NA	1	1	NA	NA	NA	NA
SPAC24H6.11c	1262.07	1296.12	1228.03	0.947462	-0.0778601	0.685124	0.836053	NA	NA	NA	NA	NA	NA	NA
SPAC24H6.12c	409.364	424.18	394.547	0.93014	-0.10448	0.683204	0.834473	NA	NA	NA	NA	NA	NA	NA
SPAC24H6.13	1973.73	2417.04	1530.43	0.633184	-0.659303	0.00133215	0.00780612	NA	NA	1	NA	NA	NA	NA
SPAC25A8.01c	2979.71	2819.76	3139.66	1.11345	0.155038	0.434924	0.632978	NA	NA	NA	NA	NA	NA	NA
SPAC25A8.02	513.206	408.584	617.828	1.51212	0.596573	0.0119454	0.0448942	NA	NA	1	NA	NA	NA	NA
SPAC25A8.03c	240.883	251.535	230.231	0.915305	-0.127676	0.620698	0.786501	NA	NA	NA	NA	NA	NA	NA
SPAC25B8.01	210.109	188.777	231.441	1.226	0.293963	0.333155	0.533656	NA	NA	NA	NA	NA	NA	NA
SPAC25B8.02	422.55	400.193	444.906	1.11173	0.152803	0.526969	0.714088	NA	NA	NA	NA	NA	NA	NA
SPAC25B8.03	1149.84	884.068	1415.62	1.60126	0.679205	0.00182436	0.010131	NA	NA	1	NA	NA	NA	NA
SPAC25B8.04c	915.118	740.959	1089.28	1.47009	0.555907	0.0118114	0.0444609	NA	NA	1	NA	NA	NA	NA
SPAC25B8.05	479.934	594.503	365.366	0.614573	-0.702343	0.00395931	0.0187081	NA	NA	1	1	NA	1	NA
SPAC25B8.06c	384.437	356.321	412.553	1.15781	0.211401	0.3992	0.601728	NA	NA	NA	NA	NA	NA	NA
SPAC25B8.07c	504.847	449.654	560.04	1.24549	0.316715	0.195408	0.367201	NA	NA	NA	NA	NA	NA	NA
SPAC25B8.08	641.923	443.253	840.594	1.89642	0.92328	6.48918e-05	0.000608508	NA	NA	1	NA	NA	NA	NA
SPAC25B8.09	387.155	287.211	487.099	1.69596	0.762105	0.0143626	0.0515451	NA	NA	NA	NA	NA	NA	NA
SPAC25B8.10	1001.1	763.784	1238.41	1.62142	0.697255	0.00141846	0.00826116	NA	NA	1	NA	NA	NA	NA
SPAC25B8.11	1360.42	1054.83	1666.01	1.57941	0.659389	0.00145002	0.00840833	NA	NA	1	NA	NA	NA	1
SPAC25B8.12c	5445.26	8171.9	2718.63	0.33268	-1.58779	3.28189e-15	2.70898e-13	NA	1	1	NA	NA	NA	NA
SPAC25B8.13c	842.316	754.005	930.626	1.23424	0.303628	0.199097	0.372145	NA	NA	NA	NA	NA	NA	NA
SPAC25B8.14	461.855	439.995	483.714	1.09936	0.136668	0.636237	0.797652	NA	NA	NA	NA	NA	NA	NA
SPAC25B8.15c	259.404	325.243	193.565	0.595138	-0.748703	0.0138052	0.0500552	NA	NA	NA	NA	NA	NA	NA
SPAC25B8.16	678.623	800.728	556.519	0.695017	-0.52488	0.0915526	0.211222	NA	NA	NA	NA	NA	1	NA
SPAC25B8.17	388.288	425.813	350.762	0.823746	-0.279728	0.263806	0.455545	NA	NA	NA	NA	NA	NA	NA
SPAC25B8.18	176.358	94.9653	257.751	2.71416	1.4405	0.0216079	0.0711762	NA	NA	NA	NA	NA	NA	NA
SPAC25B8.19c	776.613	666.666	886.56	1.32984	0.411253	0.107205	0.238509	NA	NA	NA	NA	NA	NA	1
SPAC25B8.20	60.14	71.3112	48.9688	0.686692	-0.542265	0.211959	0.389114	NA	NA	NA	NA	NA	NA	NA
SPAC25G10.01	942.29	686.575	1198	1.7449	0.803143	0.000255801	0.0019435	NA	NA	1	NA	NA	1	NA
SPAC25G10.02	69.9295	62.7579	77.1012	1.22855	0.296956	0.520141	0.70857	NA	NA	NA	NA	NA	NA	NA
SPAC25G10.03	2952.93	2338.08	3567.77	1.52594	0.609694	0.110405	0.243058	NA	NA	NA	NA	NA	NA	1
SPAC25G10.04c	111.512	102.983	120.042	1.16564	0.221127	0.470687	0.666904	NA	NA	NA	NA	NA	NA	NA
SPAC25G10.05c	3006.92	4369.91	1643.93	0.376193	-1.41046	3.0259e-11	1.3578e-09	NA	1	1	NA	NA	NA	NA
SPAC25G10.06	1348.83	1798.93	898.737	0.499595	-1.00117	1.92362e-06	2.98406e-05	NA	1	1	NA	NA	NA	NA
SPAC25G10.07c	603.039	573.854	632.225	1.10172	0.139755	0.55332	0.736365	NA	NA	NA	NA	NA	NA	NA
SPAC25G10.08	11966	14809.3	9122.66	0.61601	-0.698974	0.000367465	0.00266183	NA	NA	1	NA	NA	1	NA
SPAC25G10.09c	8412.91	6216.19	10609.6	1.70677	0.771272	0.00230934	0.0122542	NA	NA	1	NA	NA	NA	NA
SPAC25H1.02	292.099	300.833	283.364	0.941932	-0.0863045	0.716824	0.860601	NA	NA	NA	NA	NA	NA	NA
SPAC25H1.03	85.1751	60.776	109.574	1.80292	0.850335	0.0284625	0.0880613	NA	NA	NA	NA	NA	NA	NA
SPAC25H1.04	163.642	187.128	140.156	0.748984	-0.416993	0.184851	0.352012	NA	NA	NA	NA	NA	NA	NA
SPAC25H1.05	379.187	447.176	311.198	0.695917	-0.523013	0.037574	0.108706	NA	NA	NA	NA	NA	NA	NA
SPAC25H1.06	451.178	507.806	394.55	0.776971	-0.364068	0.132083	0.275798	NA	NA	NA	NA	NA	NA	NA
SPAC25H1.07	2516.65	2937.32	2095.98	0.713568	-0.486876	0.0143383	0.0515091	NA	NA	NA	NA	NA	NA	NA
SPAC25H1.08c	1898.76	2630.47	1167.05	0.443666	-1.17246	1.70164e-08	4.29328e-07	NA	1	1	NA	NA	NA	NA
SPAC25H1.09	10.1756	10.6816	9.66949	0.905244	-0.143622	0.91951	0.981673	NA	NA	NA	NA	NA	NA	NA
SPAC25H1.10c	405.593	316.933	494.253	1.55949	0.641074	0.0116659	0.0440171	NA	NA	1	NA	NA	NA	NA
SPAC26A3.01	5778.97	5163.94	6394.01	1.2382	0.30825	0.112078	0.245368	NA	NA	NA	NA	NA	NA	NA
SPAC26A3.02	536.25	569.296	503.204	0.883906	-0.178035	0.41305	0.611256	NA	NA	NA	NA	NA	NA	NA
SPAC26A3.03c	168.134	208.792	127.476	0.610541	-0.71184	0.0223573	0.0728108	NA	NA	NA	NA	NA	NA	NA
SPAC26A3.04	5336.24	7261.13	3411.36	0.46981	-1.08985	1.82972e-07	3.70713e-06	NA	1	1	NA	NA	NA	NA
SPAC26A3.05	16823.3	15185.8	18460.7	1.21565	0.281732	0.150204	0.302763	NA	NA	NA	NA	NA	NA	NA
SPAC26A3.06	496.328	615.525	377.131	0.612698	-0.706752	0.00406823	0.0190878	NA	NA	1	NA	NA	NA	NA
SPAC26A3.07c	3276.67	4348.26	2205.08	0.507117	-0.979608	7.20547e-06	9.28242e-05	NA	NA	1	NA	NA	1	NA
SPAC26A3.08	746.156	863.64	628.673	0.727934	-0.458121	0.0399957	0.114088	NA	NA	NA	NA	NA	NA	NA
SPAC26A3.09c	1788.29	1557.96	2018.63	1.29569	0.373721	0.0709923	0.175149	NA	NA	NA	NA	NA	NA	NA
SPAC26A3.10	1034.26	938.744	1129.78	1.2035	0.267235	0.21632	0.394953	NA	NA	NA	NA	NA	NA	NA
SPAC26A3.11	563.079	531.281	594.877	1.1197	0.163116	0.476901	0.671276	NA	NA	NA	NA	NA	NA	NA
SPAC26A3.12c	2311.43	2469.03	2153.83	0.872337	-0.197042	0.333211	0.533656	NA	NA	NA	NA	NA	NA	NA
SPAC26A3.13c	0	0	0	NA	NA	NA	NA	NA	NA	NA	NA	NA	NA	NA
SPAC26A3.14c	471.092	383.987	558.197	1.45369	0.539716	0.0310718	0.0941694	NA	NA	NA	1	NA	NA	NA
SPAC26A3.15c	2260.5	2272.14	2248.87	0.989761	-0.0148478	0.968581	1	NA	NA	NA	NA	NA	NA	NA
SPAC26A3.16	2313.55	2306.45	2320.66	1.00616	0.00886408	0.983588	1	NA	NA	NA	NA	NA	NA	NA
SPAC26A3.17c	769.498	1041.52	497.479	0.477649	-1.06598	2.4251e-06	3.67404e-05	NA	1	1	NA	NA	NA	NA
SPAC26F1.01	906.147	665.806	1146.49	1.72195	0.784047	0.000282348	0.0021069	NA	NA	1	NA	NA	NA	NA
SPAC26F1.02	309.858	317.396	302.319	0.952498	-0.0702124	0.802615	0.917475	NA	NA	NA	NA	NA	NA	NA
SPAC26F1.03	3381.17	3271.19	3491.15	1.06724	0.0938891	0.599952	0.771697	NA	NA	NA	NA	NA	NA	NA
SPAC26F1.04c	1161.36	603.794	1718.93	2.84688	1.50938	0.00101075	0.00619423	1	NA	1	NA	NA	NA	NA
SPAC26F1.05	5637.77	7584.7	3690.85	0.486618	-1.03914	1.81537e-07	3.68923e-06	NA	1	1	NA	NA	NA	NA
SPAC26F1.06	30796.2	41063.6	20528.9	0.49993	-1.0002	2.68219e-07	5.30791e-06	NA	1	1	NA	NA	NA	NA
SPAC26F1.07	6336.06	4052.38	8619.73	2.12708	1.08887	3.25639e-08	7.69337e-07	1	NA	1	NA	NA	NA	NA
SPAC26F1.08c	414.202	461.806	366.598	0.793836	-0.333087	0.17548	0.339562	NA	NA	NA	NA	NA	NA	NA
SPAC26F1.09	1700.37	1622.35	1778.39	1.09618	0.132478	0.532314	0.718505	NA	NA	NA	NA	NA	NA	NA
SPAC26F1.10c	800.949	614.217	987.681	1.60803	0.685296	0.0840538	0.1983	NA	NA	NA	NA	NA	NA	NA
SPAC26F1.11	67.696	56.8283	78.5637	1.38247	0.467253	0.244767	0.430775	NA	NA	NA	NA	NA	NA	NA
SPAC26F1.12c	664.962	935.358	394.567	0.421835	-1.24525	8.10183e-08	1.81363e-06	NA	1	1	NA	NA	NA	NA
SPAC26F1.13c	9562.19	12098.3	7026.08	0.580749	-0.784013	6.58794e-05	0.000616042	NA	NA	1	NA	NA	NA	NA
SPAC26F1.14c	1907.36	705.754	3108.96	4.40516	2.13919	3.54973e-24	7.65596e-22	1	NA	1	NA	NA	NA	NA
SPAC26H5.02c	343.36	329.061	357.66	1.08691	0.120235	0.645542	0.803742	NA	NA	NA	NA	NA	NA	NA
SPAC26H5.03	337.088	348.279	325.896	0.935731	-0.095835	0.714889	0.858965	NA	NA	NA	NA	NA	NA	NA
SPAC26H5.04	815.824	501.096	1130.55	2.25616	1.17387	2.41825e-05	0.000259146	1	NA	1	NA	NA	NA	NA
SPAC26H5.05	2444.32	2280.45	2608.19	1.14372	0.193731	0.335667	0.536393	NA	NA	NA	NA	NA	NA	NA
SPAC26H5.06	361.877	366.662	357.092	0.9739	-0.0381543	0.9217	0.982853	NA	NA	NA	NA	NA	NA	NA
SPAC26H5.07c	1679.72	1673.71	1685.73	1.00718	0.0103236	0.946868	0.995403	NA	NA	NA	NA	NA	NA	NA
SPAC26H5.08c	3103.43	1728.68	4478.18	2.59052	1.37324	0.00074133	0.0047843	1	NA	1	NA	NA	NA	NA
SPAC26H5.09c	2993.56	2810.97	3176.16	1.12992	0.176219	0.69849	0.847261	NA	NA	NA	NA	NA	NA	NA
SPAC26H5.10c	21621	32391.2	10850.8	0.334992	-1.5778	9.52005e-16	8.4868e-14	NA	1	1	NA	NA	1	NA
SPAC26H5.11	1828.89	1693.35	1964.42	1.16008	0.214227	0.300868	0.498539	NA	NA	NA	NA	NA	NA	NA
SPAC26H5.12	1219.89	1149.61	1290.17	1.12227	0.166421	0.404911	0.605239	NA	NA	NA	NA	NA	NA	1
SPAC26H5.13c	498.847	513.541	484.153	0.942773	-0.0850177	0.727643	0.865816	NA	NA	NA	NA	NA	NA	NA
SPAC27D7.02c	942.825	841.829	1043.82	1.23994	0.310274	0.157008	0.313078	NA	NA	NA	NA	NA	NA	NA
SPAC27D7.03c	4705.96	238.595	9173.33	38.4473	5.26481	4.0664e-112	6.797e-109	1	NA	1	NA	NA	1	NA
SPAC27D7.04	303.23	358.977	247.483	0.689411	-0.536564	0.0405303	0.115224	NA	NA	NA	1	NA	NA	NA
SPAC27D7.05c	81.5787	88.5723	74.5851	0.842081	-0.247969	0.472299	0.667793	NA	NA	NA	NA	NA	NA	NA
SPAC27D7.06	1060.82	1122.19	999.457	0.890634	-0.167095	0.452599	0.65007	NA	NA	NA	NA	NA	NA	NA
SPAC27D7.07c	894.171	1122.03	666.311	0.593843	-0.751846	0.000625511	0.00416136	NA	NA	1	NA	NA	1	NA
SPAC27D7.08c	202.497	220.782	184.213	0.834367	-0.261246	0.40798	0.607517	NA	NA	NA	NA	NA	NA	NA
SPAC27D7.09c	361.745	332.675	390.814	1.17476	0.232367	0.356517	0.557805	NA	NA	NA	NA	NA	NA	NA
SPAC27D7.11c	8279.61	1364.74	15194.5	11.1336	3.47685	1.54207e-05	0.000176848	1	NA	1	NA	NA	NA	NA
SPAC27D7.12c	113.593	88.0448	139.141	1.58034	0.660239	0.0566383	0.149147	NA	NA	NA	NA	NA	NA	NA
SPAC27D7.13c	301.357	187.77	414.944	2.20985	1.14395	0.00202454	0.0110184	1	NA	1	NA	NA	NA	NA
SPAC27D7.14c	4075.12	3573	4577.24	1.28106	0.357343	0.068039	0.169489	NA	NA	NA	NA	NA	NA	NA
SPAC27E2.01	572.251	463.324	681.177	1.4702	0.556008	0.0199302	0.0668605	NA	NA	NA	NA	NA	NA	NA
SPAC27E2.02	467.136	608.165	326.107	0.536215	-0.899117	0.000212521	0.00167166	NA	NA	1	NA	NA	NA	NA
SPAC27E2.03c	4278.46	5717.59	2839.33	0.496596	-1.00986	4.16293e-07	7.81836e-06	NA	1	1	NA	NA	NA	NA
SPAC27E2.04c	23.9085	25.6279	22.1891	0.865819	-0.207863	0.809095	0.922198	NA	NA	NA	NA	NA	NA	NA
SPAC27E2.05	433.782	482.844	384.72	0.796779	-0.327749	0.177054	0.340853	NA	NA	NA	NA	NA	NA	NA
SPAC27E2.06c	504.11	382.623	625.596	1.63502	0.709307	0.0325876	0.0973115	NA	NA	NA	NA	NA	NA	NA
SPAC27E2.07	308.092	280.956	335.228	1.19317	0.254796	0.37157	0.574648	NA	NA	NA	NA	NA	NA	NA
SPAC27E2.08	0	0	0	NA	NA	NA	NA	NA	NA	NA	NA	NA	NA	NA
SPAC27E2.09	2047.61	1951.8	2143.41	1.09817	0.135107	0.4801	0.673967	NA	NA	NA	NA	NA	NA	NA
SPAC27E2.10c	281.977	331.879	232.076	0.699278	-0.516062	0.0480462	0.130637	NA	NA	NA	NA	NA	NA	NA
SPAC27E2.11c	99915.9	93579.8	106252	1.13542	0.183221	0.327549	0.52809	NA	NA	NA	NA	NA	NA	NA
SPAC27E2.12	3.4172	4.43514	2.39926	0.540967	-0.886386	0.718875	0.861207	NA	NA	NA	NA	NA	NA	NA
SPAC27E2.13	0.328975	0.657949	0	0	#NAME?	0.902092	0.973172	NA	NA	NA	NA	NA	NA	NA
SPAC27E2.14	91.7388	94.9572	88.5205	0.932214	-0.101267	0.793014	0.91258	NA	NA	NA	NA	NA	NA	NA
SPAC27F1.02c	3081.7	3223.71	2939.69	0.911895	-0.13306	0.484875	0.678785	NA	NA	NA	NA	NA	NA	NA
SPAC27F1.03c	379.236	323.163	435.309	1.34703	0.429777	0.0925973	0.213191	NA	NA	NA	NA	NA	NA	NA
SPAC27F1.04c	367.573	402.346	332.8	0.82715	-0.273778	0.267258	0.459945	NA	NA	NA	NA	NA	NA	NA
SPAC27F1.05c	248.56	123.42	373.7	3.02788	1.59831	8.73786e-05	0.00079158	1	NA	1	1	NA	NA	NA
SPAC27F1.06c	1926.26	3027.54	824.977	0.272491	-1.87572	9.38331e-19	1.23013e-16	NA	1	1	NA	NA	NA	NA
SPAC27F1.07	5002.08	4531.49	5472.67	1.2077	0.27226	0.177826	0.342142	NA	NA	NA	NA	NA	NA	NA
SPAC27F1.08	899.638	787.081	1012.2	1.28601	0.362904	0.092722	0.213404	NA	NA	NA	NA	NA	NA	NA
SPAC27F1.09c	2461.13	2568.52	2353.74	0.916379	-0.125983	0.561973	0.743735	NA	NA	NA	NA	NA	1	NA
SPAC27F1.10	6.44167	3.11924	9.7641	3.13029	1.64629	0.258781	0.449755	NA	NA	NA	NA	NA	NA	NA
SPAC29A4.02c	20274.8	29685.6	10863.9	0.365967	-1.45022	1.47618e-13	1.0281e-11	NA	1	1	NA	NA	1	NA
SPAC29A4.03c	722.291	731.382	713.201	0.975141	-0.0363174	0.888383	0.970544	NA	NA	NA	NA	NA	NA	NA
SPAC29A4.04c	6631.59	8560.89	4702.3	0.549277	-0.864395	1.21044e-05	0.000144004	NA	NA	1	NA	NA	1	NA
SPAC29A4.05	600.917	633.175	568.659	0.898107	-0.15504	0.478746	0.673139	NA	NA	NA	NA	NA	NA	NA
SPAC29A4.06c	410.403	351.082	469.724	1.33793	0.420007	0.0905036	0.209597	NA	NA	NA	NA	NA	1	NA
SPAC29A4.07	164.437	169.534	159.341	0.939875	-0.0894594	0.811919	0.923841	NA	NA	NA	NA	NA	NA	NA
SPAC29A4.08c	991.778	1082.57	900.987	0.832266	-0.264883	0.23716	0.421156	NA	NA	NA	NA	NA	NA	NA
SPAC29A4.09	826.377	774.905	877.849	1.13285	0.179954	0.389543	0.590988	NA	NA	NA	NA	NA	NA	NA
SPAC29A4.10	864.638	954.154	775.121	0.812365	-0.2998	0.176327	0.340336	NA	NA	NA	NA	NA	NA	1
SPAC29A4.11	2375.84	1893.56	2858.12	1.50939	0.593968	0.00326102	0.0161266	NA	NA	1	NA	NA	NA	NA
SPAC29A4.12c	2176.74	45.5128	4307.96	94.6538	6.56459	0.00067706	0.00446	1	NA	1	NA	NA	NA	NA
SPAC29A4.13	309.257	352.227	266.287	0.756008	-0.403526	0.118314	0.254601	NA	NA	NA	NA	NA	NA	NA
SPAC29A4.14c	576.065	608.296	543.834	0.894029	-0.161606	0.529103	0.715965	NA	NA	NA	NA	NA	NA	NA
SPAC29A4.15	3705.63	4493.98	2917.28	0.649152	-0.623371	0.00219068	0.0117457	NA	NA	1	NA	NA	NA	NA
SPAC29A4.16	6188.06	5903.88	6472.24	1.09627	0.132602	0.503362	0.693693	NA	NA	NA	NA	NA	NA	NA
SPAC29A4.17c	180.417	73.9269	286.907	3.88096	1.95641	0.00174338	0.00974604	1	NA	1	NA	NA	NA	NA
SPAC29A4.18	785.987	850.31	721.663	0.848706	-0.236664	0.295168	0.492388	NA	NA	NA	1	NA	NA	NA
SPAC29A4.19c	551.801	519.633	583.969	1.12381	0.168398	0.474879	0.669557	NA	NA	NA	NA	NA	NA	NA
SPAC29A4.20	959.07	1142	776.136	0.679626	-0.557186	0.00928922	0.0365986	NA	NA	1	NA	NA	NA	NA
SPAC29A4.22	152.094	7.06693	297.121	42.0439	5.39382	0.00320136	0.0158904	1	NA	1	NA	NA	NA	NA
SPAC29B12.01	3842.27	3200.55	4483.99	1.40101	0.486464	0.0130853	0.048203	NA	NA	NA	NA	NA	NA	NA
SPAC29B12.02c	1079.46	1192.95	965.981	0.809744	-0.304461	0.17478	0.338915	NA	NA	NA	NA	NA	NA	NA
SPAC29B12.03	914.103	660.266	1167.94	1.7689	0.822849	0.00323032	0.0159984	NA	NA	1	NA	NA	NA	NA
SPAC29B12.04	3192.65	4181.4	2203.9	0.527074	-0.923924	1.48697e-05	0.000172005	NA	NA	1	NA	NA	NA	NA
SPAC29B12.05c	85.5115	89.8802	81.1428	0.902788	-0.14754	0.66518	0.81874	NA	NA	NA	NA	NA	NA	NA
SPAC29B12.06c	398.665	377.725	419.606	1.11088	0.1517	0.603745	0.774193	NA	NA	NA	NA	NA	1	NA
SPAC29B12.07	6620.8	6077.03	7164.57	1.17896	0.237514	0.218381	0.397413	NA	NA	NA	NA	NA	NA	NA
SPAC29B12.08	1402.99	1018.1	1787.88	1.7561	0.812373	0.000539371	0.00370602	NA	NA	1	NA	NA	NA	NA
SPAC29B12.10c	876.205	1172.6	579.814	0.49447	-1.01605	5.42934e-06	7.33345e-05	NA	1	1	NA	NA	NA	NA
SPAC29B12.11c	769.509	545.106	993.912	1.82334	0.866581	0.000109617	0.000953055	NA	NA	1	NA	NA	NA	NA
SPAC29B12.12	17.6579	25.1324	10.1834	0.405191	-1.30333	0.115993	0.251272	NA	NA	NA	NA	NA	NA	NA
SPAC29B12.13	94.1831	47.9741	140.392	2.92642	1.54913	0.0711623	0.175375	NA	NA	NA	NA	NA	NA	NA
SPAC29B12.14c	265.336	237.531	293.141	1.23412	0.303477	0.243191	0.428433	NA	NA	NA	NA	NA	NA	NA
SPAC29E6.01	506.923	386.059	627.787	1.62614	0.701454	0.0182435	0.0622644	NA	NA	NA	NA	NA	NA	NA
SPAC29E6.02	1623.97	1683.59	1564.35	0.929173	-0.105981	0.610134	0.779327	NA	NA	NA	NA	NA	NA	NA
SPAC29E6.03c	2132.86	2197.4	2068.32	0.941254	-0.0873433	0.68128	0.833188	NA	NA	NA	NA	NA	NA	NA
SPAC29E6.04	192.57	211.262	173.879	0.82305	-0.280949	0.347041	0.548149	NA	NA	NA	NA	NA	NA	NA
SPAC29E6.05c	119.4	88.1992	150.601	1.70751	0.771896	0.0242127	0.0774429	NA	NA	NA	NA	NA	NA	NA
SPAC29E6.06c	2264.89	2804.8	1724.99	0.615014	-0.701308	0.00292444	0.0147124	NA	NA	1	NA	NA	NA	NA
SPAC29E6.07	2.91433	4.43514	1.39353	0.314203	-1.67023	0.492164	0.684403	NA	NA	NA	NA	NA	NA	NA
SPAC29E6.08	1469.68	1327.01	1612.34	1.21501	0.280973	0.309904	0.508222	NA	NA	NA	NA	NA	NA	1
SPAC29E6.09	247.938	187.965	307.912	1.63814	0.712056	0.0131554	0.0484078	NA	NA	1	NA	NA	NA	NA
SPAC29E6.10c	3064.36	3017.18	3111.54	1.03128	0.0444303	0.798115	0.914933	NA	NA	NA	NA	NA	NA	NA
SPAC2C4.03c	375.666	392.176	359.157	0.915807	-0.126884	0.58438	0.763267	NA	NA	NA	NA	NA	NA	NA
SPAC2C4.04c	467.669	520.251	415.088	0.797861	-0.325791	0.191287	0.360978	NA	NA	NA	NA	NA	NA	NA
SPAC2C4.05	1247.77	1285.42	1210.13	0.941427	-0.0870781	0.653944	0.81073	NA	NA	NA	NA	NA	NA	NA
SPAC2C4.06c	253.196	342.009	164.382	0.480638	-1.05698	0.000182434	0.00146959	NA	1	1	NA	NA	NA	NA
SPAC2C4.07c	934.157	793.482	1074.83	1.35458	0.437842	0.0423641	0.118961	NA	NA	NA	NA	NA	1	NA
SPAC2C4.08	71.0941	67.3635	74.8246	1.11076	0.151545	0.76492	0.891762	NA	NA	NA	NA	NA	NA	NA
SPAC2C4.09	191.717	163.466	219.968	1.34565	0.428305	0.154054	0.308754	NA	NA	NA	NA	NA	NA	NA
SPAC2C4.10c	318.751	329.077	308.426	0.937246	-0.0935001	0.71102	0.856864	NA	NA	NA	NA	NA	NA	NA
SPAC2C4.11c	602.687	852.992	352.382	0.413113	-1.27539	0.000110111	0.000954867	NA	1	1	NA	NA	1	NA
SPAC2C4.12c	270.834	403.264	138.404	0.343209	-1.54284	5.4164e-06	7.33078e-05	NA	1	1	NA	NA	NA	NA
SPAC2C4.13	502.379	580.06	424.698	0.732162	-0.449766	0.0615469	0.158697	NA	NA	NA	NA	NA	NA	NA
SPAC2C4.14c	748.435	878.618	618.252	0.703664	-0.507041	0.0223327	0.0727664	NA	NA	NA	NA	NA	NA	NA
SPAC2C4.15c	616.88	553.311	680.449	1.22978	0.298396	0.188794	0.357585	NA	NA	NA	NA	NA	NA	NA
SPAC2C4.16c	3269.37	4425.64	2113.11	0.47747	-1.06652	3.81176e-06	5.45727e-05	NA	1	1	NA	NA	NA	NA
SPAC2C4.17c	1596.73	944.999	2248.46	2.37932	1.25055	0.000876896	0.00548963	1	NA	1	NA	NA	NA	NA
SPAC2E12.02	1469.06	1236.95	1701.18	1.3753	0.459751	0.178859	0.343242	NA	NA	NA	NA	NA	NA	1
SPAC2E12.03c	149.528	112.884	186.171	1.64922	0.721781	0.0328287	0.097813	NA	NA	NA	NA	NA	NA	NA
SPAC2E12.05	210.812	244.135	177.488	0.727009	-0.459955	0.1099	0.242487	NA	NA	NA	NA	NA	NA	NA
SPAC2E1P3.01	819.914	485.378	1154.45	2.37846	1.25003	0.00387049	0.0183143	1	NA	1	NA	NA	NA	NA
SPAC2E1P3.02c	45.4321	26.6108	64.2533	2.41456	1.27176	0.0149907	0.0533694	NA	NA	NA	NA	NA	NA	NA
SPAC2E1P3.03c	0	0	0	NA	NA	NA	NA	NA	NA	NA	NA	NA	NA	NA
SPAC2E1P3.04	1440.28	1243.73	1636.84	1.31607	0.396241	0.0650068	0.164572	NA	NA	NA	NA	NA	NA	NA
SPAC2E1P3.05c	1160.84	1207.11	1114.57	0.923336	-0.115073	0.543078	0.72766	NA	NA	NA	NA	NA	NA	NA
SPAC2E1P5.01c	661.909	713.634	610.185	0.85504	-0.225937	0.320157	0.519934	NA	NA	NA	NA	NA	NA	NA
SPAC2E1P5.02c	85.7868	97.5971	73.9765	0.757979	-0.39977	0.291392	0.488773	NA	NA	NA	NA	NA	NA	NA
SPAC2E1P5.03	612.858	842.301	383.415	0.4552	-1.13543	9.29388e-07	1.60982e-05	NA	1	1	NA	NA	NA	NA
SPAC2E1P5.04c	192.229	174.976	209.482	1.19721	0.25967	0.408997	0.60849	NA	NA	NA	NA	NA	NA	NA
SPAC2E1P5.05	1265.28	1803.63	726.931	0.403039	-1.31101	1.09611e-09	3.64608e-08	NA	1	1	NA	NA	1	NA
SPAC2F3.01	322.313	301.32	343.305	1.13934	0.188193	0.50457	0.694387	NA	NA	NA	NA	NA	NA	NA
SPAC2F3.02	600.853	603.893	597.813	0.989932	-0.0145982	0.966998	1	NA	NA	NA	NA	NA	NA	NA
SPAC2F3.03c	1279.02	1889.42	668.625	0.353878	-1.49868	2.83716e-12	1.52978e-10	NA	1	1	NA	NA	NA	NA
SPAC2F3.04c	397.941	471.512	324.37	0.687935	-0.539655	0.0269073	0.0841056	NA	NA	NA	NA	NA	NA	NA
SPAC2F3.05c	671.74	407.447	936.032	2.29731	1.19995	0.00732411	0.0306769	1	NA	1	NA	NA	NA	NA
SPAC2F3.06c	5076.96	5023.1	5130.82	1.02145	0.030612	0.871584	0.957935	NA	NA	NA	NA	NA	NA	NA
SPAC2F3.07c	0	0	0	NA	NA	NA	NA	NA	NA	NA	NA	NA	NA	NA
SPAC2F3.08	978.461	436.324	1520.6	3.48502	1.80117	4.08018e-16	3.89716e-14	1	NA	1	NA	NA	NA	NA
SPAC2F3.09	2724.25	3111.17	2337.33	0.751269	-0.412599	0.0458322	0.126417	NA	NA	NA	NA	NA	NA	NA
SPAC2F3.10	1038.59	846.898	1230.27	1.45268	0.538719	0.0127689	0.0472978	NA	NA	1	NA	NA	NA	NA
SPAC2F3.11	932.958	1159.38	706.536	0.609409	-0.714517	0.000978434	0.00602377	NA	NA	1	NA	NA	NA	NA
SPAC2F3.12c	408.768	534.278	283.258	0.530169	-0.915475	0.000184654	0.00148166	NA	NA	1	NA	NA	NA	NA
SPAC2F3.13c	1381.6	1818.74	944.455	0.519289	-0.945389	7.74506e-06	9.84477e-05	NA	NA	1	NA	NA	NA	NA
SPAC2F3.14c	338.137	323.163	353.11	1.09267	0.127855	0.643964	0.802824	NA	NA	NA	NA	NA	NA	NA
SPAC2F3.15	658.536	663.515	653.557	0.984991	-0.0218172	0.956922	1	NA	NA	NA	NA	NA	NA	NA
SPAC2F3.16	859.474	678.283	1040.66	1.53426	0.617546	0.0084885	0.0344132	NA	NA	1	NA	NA	NA	NA
SPAC2F3.17c	446.604	419.234	473.975	1.13057	0.177056	0.452521	0.65007	NA	NA	NA	NA	NA	NA	NA
SPAC2F3.18c	409.342	435.147	383.538	0.881399	-0.182134	0.508021	0.697704	NA	NA	NA	NA	NA	NA	NA
SPAC2F7.02c	516.645	597.784	435.505	0.728532	-0.456936	0.0612545	0.158188	NA	NA	NA	NA	NA	NA	NA
SPAC2F7.03c	1473.63	1376.11	1571.16	1.14174	0.191236	0.373267	0.576099	NA	NA	NA	NA	NA	NA	NA
SPAC2F7.04	524.518	530.517	518.518	0.977382	-0.0330061	0.834058	0.936008	NA	NA	NA	NA	NA	NA	NA
SPAC2F7.05c	4268.75	5608.67	2928.84	0.522199	-0.937329	5.48027e-05	0.000529688	NA	NA	1	NA	NA	1	NA
SPAC2F7.06c	180.82	76.8837	284.757	3.70374	1.88898	0.0148774	0.0530226	NA	NA	NA	NA	NA	NA	NA
SPAC2F7.07c	1533.47	1664.83	1402.1	0.842189	-0.247784	0.243244	0.428433	NA	NA	NA	NA	NA	NA	NA
SPAC2F7.08c	1278.74	1225.92	1331.56	1.08617	0.119247	0.57482	0.754761	NA	NA	NA	NA	NA	NA	NA
SPAC2F7.09c	296.869	277.959	315.778	1.13606	0.184037	0.468845	0.665823	NA	NA	NA	NA	1	NA	NA
SPAC2F7.10	437.382	482.641	392.123	0.812452	-0.299645	0.23031	0.412386	NA	NA	NA	1	NA	NA	NA
SPAC2F7.11	1325.4	1642.7	1008.11	0.61369	-0.704418	0.000802054	0.00509262	NA	NA	1	NA	NA	1	NA
SPAC2F7.13c	1512.3	1920.36	1104.25	0.575025	-0.798303	0.000168273	0.00136538	NA	NA	1	NA	NA	NA	NA
SPAC2F7.14c	555.964	754.581	357.348	0.473571	-1.07835	4.16576e-06	5.876e-05	NA	1	1	NA	NA	1	NA
SPAC2F7.15	438.213	474.656	401.77	0.846446	-0.24051	0.294146	0.49187	NA	NA	NA	NA	NA	NA	NA
SPAC2F7.16c	2092.01	2029.9	2154.13	1.0612	0.0856966	0.657251	0.813216	NA	NA	NA	NA	NA	NA	NA
SPAC2F7.17	341.774	381.438	302.111	0.792033	-0.336368	0.211913	0.389114	NA	NA	NA	NA	1	1	NA
SPAC2G11.02	1070.01	1401.48	738.532	0.526964	-0.924224	1.79818e-05	0.000200712	NA	NA	1	NA	NA	NA	NA
SPAC2G11.03c	1051.77	917.397	1186.14	1.29294	0.370657	0.0888044	0.20688	NA	NA	NA	NA	NA	NA	NA
SPAC2G11.04	259.782	218.995	300.569	1.3725	0.456802	0.0994482	0.225088	NA	NA	NA	NA	NA	NA	NA
SPAC2G11.05c	214.644	175.488	253.801	1.44626	0.532328	0.0838362	0.198067	NA	NA	NA	NA	NA	NA	NA
SPAC2G11.06	835.334	855.736	814.931	0.952315	-0.0704885	0.769871	0.895902	NA	NA	NA	NA	NA	NA	NA
SPAC2G11.07c	4560.57	3414.75	5706.4	1.6711	0.7408	0.000157872	0.00129487	NA	NA	1	NA	NA	NA	NA
SPAC2G11.08c	133.459	108.58	158.339	1.45827	0.54426	0.0992475	0.224814	NA	NA	NA	NA	NA	NA	NA
SPAC2G11.09	1604.55	1406.8	1802.29	1.28112	0.357407	0.0893916	0.208031	NA	NA	NA	NA	NA	NA	NA
SPAC2G11.10c	409.413	347.102	471.724	1.35904	0.442584	0.0668486	0.167534	NA	NA	NA	NA	NA	NA	NA
SPAC2G11.11c	652.007	808.527	495.487	0.612827	-0.706449	0.0025987	0.0134689	NA	NA	1	NA	NA	NA	NA
SPAC2G11.12	912.543	925.407	899.68	0.972199	-0.0406759	0.872876	0.958264	NA	NA	NA	NA	NA	NA	NA
SPAC2G11.13	459.125	278.146	640.105	2.30133	1.20247	0.0028347	0.01438	1	NA	1	NA	NA	NA	NA
SPAC2G11.14	1634.62	1620.28	1648.95	1.01769	0.0253026	0.861411	0.951808	NA	NA	NA	NA	NA	NA	NA
SPAC2G11.15c	210.659	205.047	216.27	1.05473	0.0768784	0.834091	0.936008	NA	NA	NA	NA	NA	NA	NA
SPAC2H10.01	1740.83	3006.45	475.203	0.158061	-2.66145	1.72954e-34	7.22732e-32	NA	1	1	NA	NA	NA	1
SPAC2H10.02c	484.503	414.026	554.979	1.34044	0.42271	0.0869321	0.203369	NA	NA	NA	NA	NA	NA	NA
SPAC2H10.04	3.98955	4.60565	3.37346	0.732461	-0.449176	0.800675	0.916507	NA	NA	NA	NA	NA	NA	NA
SPAC30.01c	4184.59	3723.86	4645.32	1.24745	0.31898	0.107479	0.238818	NA	NA	NA	NA	NA	NA	NA
SPAC30.02c	254.952	336.119	173.784	0.517031	-0.951677	0.000557633	0.0038122	NA	NA	1	NA	NA	NA	NA
SPAC30.03c	614.116	660.988	567.244	0.858176	-0.220655	0.294495	0.49188	NA	NA	NA	NA	NA	1	NA
SPAC30.04c	3819.04	3658.84	3979.24	1.08757	0.121107	0.517101	0.705701	NA	NA	NA	NA	NA	NA	NA
SPAC30C2.02	908.772	1439.04	378.507	0.263028	-1.92671	1.34334e-17	1.5223e-15	NA	1	1	NA	1	NA	NA
SPAC30C2.03	67.9136	72.611	63.2161	0.870612	-0.199898	0.678895	0.831031	NA	NA	NA	NA	NA	NA	NA
SPAC30C2.04	4550.16	5558.14	3542.18	0.637297	-0.649963	0.00115585	0.00698106	NA	NA	1	NA	NA	1	NA
SPAC30C2.05	242.513	253.152	231.874	0.915947	-0.126664	0.677319	0.829715	NA	NA	NA	NA	NA	NA	NA
SPAC30C2.06c	307.907	361.942	253.871	0.701414	-0.511663	0.044239	0.122884	NA	NA	NA	NA	NA	NA	NA
SPAC30C2.07	1697.32	1566.79	1827.85	1.16662	0.222338	0.277194	0.471789	NA	NA	NA	NA	NA	NA	NA
SPAC30C2.08	3127.5	3186.19	3068.81	0.96316	-0.054152	0.777759	0.902272	NA	NA	NA	NA	NA	NA	NA
SPAC30D11.01c	991.355	340.709	1642	4.81936	2.26884	0.000526766	0.00363088	1	NA	1	NA	NA	NA	NA
SPAC30D11.02c	2.59253	2.13633	3.04872	1.42709	0.513073	0.967469	1	NA	NA	NA	NA	NA	NA	NA
SPAC30D11.03	1155.61	1492.91	818.307	0.548129	-0.867413	7.48769e-05	0.00069052	NA	NA	1	NA	NA	1	NA
SPAC30D11.04c	3671.78	3523.01	3820.55	1.08445	0.116968	0.508095	0.697704	NA	NA	NA	NA	NA	NA	NA
SPAC30D11.05	536.154	560.873	511.436	0.911856	-0.133121	0.574672	0.754716	NA	NA	NA	NA	NA	NA	NA
SPAC30D11.06c	414.758	409.429	420.087	1.02603	0.0370775	0.922448	0.983132	NA	NA	NA	NA	NA	NA	NA
SPAC30D11.07	127.424	156.586	98.2624	0.627531	-0.672242	0.0406915	0.115575	NA	NA	NA	NA	NA	NA	NA
SPAC30D11.08c	883.45	836.606	930.293	1.11199	0.153138	0.519139	0.707494	NA	NA	NA	NA	NA	NA	NA
SPAC30D11.09	981.396	900.16	1062.63	1.18049	0.239389	0.290842	0.488217	NA	NA	NA	NA	NA	NA	NA
SPAC30D11.10	779.807	684.586	875.028	1.27819	0.354099	0.112527	0.246271	NA	NA	NA	NA	NA	NA	NA
SPAC30D11.11	1373.58	1271.84	1475.32	1.15999	0.214107	0.293456	0.491003	NA	NA	NA	NA	NA	NA	NA
SPAC30D11.12	1616.67	2142.19	1091.15	0.509363	-0.973233	2.23124e-05	0.000242177	NA	NA	1	NA	NA	NA	NA
SPAC30D11.13	399.146	404.255	394.037	0.974722	-0.0369372	0.951585	0.998007	NA	NA	NA	NA	NA	NA	NA
SPAC30D11.14c	1336.16	1290.44	1381.87	1.07085	0.0987583	0.625506	0.789129	NA	NA	NA	NA	NA	1	NA
SPAC31A2.02	336.216	469.32	203.112	0.432778	-1.2083	3.59201e-05	0.000368347	NA	1	1	NA	NA	NA	NA
SPAC31A2.03	315.512	304.416	326.608	1.0729	0.101519	0.70616	0.853678	NA	NA	NA	NA	NA	NA	NA
SPAC31A2.04c	523.193	522.72	523.666	1.00181	0.00260746	0.96078	1	NA	NA	NA	NA	NA	NA	NA
SPAC31A2.05c	968.514	904.385	1032.64	1.14182	0.191333	0.379127	0.580056	NA	NA	NA	NA	NA	NA	NA
SPAC31A2.06	742.454	678.014	806.895	1.19009	0.251065	0.268499	0.461724	NA	NA	NA	NA	NA	NA	NA
SPAC31A2.07c	1335.66	1792.47	878.836	0.490292	-1.02829	1.23399e-06	2.02844e-05	NA	1	1	NA	NA	1	NA
SPAC31A2.08	253.348	256.287	250.409	0.977064	-0.0334748	0.901161	0.973172	NA	NA	NA	NA	NA	NA	NA
SPAC31A2.09c	557.978	550.882	565.075	1.02576	0.036699	0.92649	0.986073	NA	NA	NA	NA	NA	NA	NA
SPAC31A2.10	508.563	475.282	541.845	1.14005	0.189097	0.438107	0.636088	NA	NA	NA	NA	NA	NA	NA
SPAC31A2.11c	560.198	563.513	556.883	0.988234	-0.0170749	0.936494	0.99057	NA	NA	NA	NA	NA	NA	1
SPAC31A2.12	786.473	660.159	912.786	1.38268	0.467462	0.0414349	0.117025	NA	NA	NA	NA	NA	NA	NA
SPAC31A2.13c	187.758	169.201	206.314	1.21934	0.286106	0.337883	0.538647	NA	NA	NA	NA	1	NA	NA
SPAC31A2.14	1687.41	1355.51	2019.32	1.48971	0.575036	0.00508319	0.0227333	NA	NA	1	NA	NA	NA	NA
SPAC31A2.15c	213.961	219.189	208.732	0.952294	-0.0705217	0.738634	0.873145	NA	NA	NA	NA	NA	NA	NA
SPAC31A2.16	1111.2	1258.32	964.085	0.76617	-0.384263	0.0682959	0.169939	NA	NA	NA	NA	NA	NA	NA
SPAC31F12.01	1739.57	1541.12	1938.02	1.25754	0.330605	0.10316	0.231298	NA	NA	NA	NA	NA	NA	NA
SPAC31G5.01	495.484	584.056	406.912	0.696701	-0.521388	0.0267372	0.0836524	NA	NA	NA	NA	NA	1	NA
SPAC31G5.02	680.288	833.553	527.024	0.632262	-0.661405	0.00380362	0.0180746	NA	NA	1	NA	NA	NA	NA
SPAC31G5.03	2705.08	3551.8	1858.35	0.523214	-0.934526	0.000158034	0.00129487	NA	NA	1	NA	NA	1	NA
SPAC31G5.04	2331.68	3091.69	1571.67	0.508351	-0.976103	2.74357e-06	4.09454e-05	NA	NA	1	NA	NA	NA	NA
SPAC31G5.05c	2133.08	1690.32	2575.85	1.52388	0.607749	0.00271585	0.0139678	NA	NA	1	NA	NA	NA	NA
SPAC31G5.06	46.4665	36.139	56.7939	1.57154	0.652178	0.198075	0.37096	NA	NA	NA	NA	NA	NA	NA
SPAC31G5.07	22.1939	14.2883	30.0994	2.10658	1.0749	0.134182	0.27957	NA	NA	NA	NA	NA	NA	NA
SPAC31G5.08	414.383	593.528	235.238	0.396338	-1.3352	1.13129e-07	2.4243e-06	NA	1	1	NA	NA	NA	NA
SPAC31G5.09c	699.124	140.494	1257.75	8.95235	3.16227	1.11071e-36	4.95079e-34	1	NA	1	NA	NA	NA	NA
SPAC31G5.10	115.392	99.8878	130.897	1.31044	0.390047	0.279491	0.474587	NA	NA	NA	NA	NA	NA	NA
SPAC31G5.11	2095.14	2379.26	1811.03	0.761173	-0.393705	0.0601697	0.15617	NA	NA	NA	1	NA	NA	NA
SPAC31G5.12c	264.19	165.286	363.094	2.19677	1.13538	0.0134743	0.04931	1	NA	1	NA	NA	NA	NA
SPAC31G5.13	1667.18	1816.92	1517.43	0.835164	-0.259869	0.192862	0.363334	NA	NA	NA	NA	NA	NA	NA
SPAC31G5.14	1082.27	999.31	1165.22	1.16603	0.221599	0.277245	0.471789	NA	NA	NA	NA	NA	NA	NA
SPAC31G5.15	990.216	805.853	1174.58	1.45756	0.543556	0.0129468	0.0477982	NA	NA	1	NA	NA	NA	NA
SPAC31G5.16c	1306.91	1246.99	1366.83	1.0961	0.132383	0.486256	0.679789	NA	NA	NA	NA	NA	NA	NA
SPAC31G5.17c	4932.41	6754.71	3110.11	0.460436	-1.11893	8.01983e-06	0.000101362	NA	1	1	NA	NA	NA	NA
SPAC31G5.18c	271.964	206.973	336.954	1.62801	0.703111	0.106879	0.238038	NA	NA	NA	NA	NA	NA	NA
SPAC31G5.19	2125.25	2034.95	2215.54	1.08874	0.122664	0.53204	0.718505	NA	NA	NA	NA	NA	NA	NA
SPAC31G5.21	307.736	254.662	360.809	1.41681	0.50265	0.0634158	0.161833	NA	NA	NA	NA	NA	NA	NA
SPAC323.01c	305.993	374.094	237.893	0.635917	-0.65309	0.0114055	0.0432789	NA	NA	1	NA	NA	NA	NA
SPAC323.02c	1562.83	1543.78	1581.88	1.02468	0.0351667	0.877619	0.962402	NA	NA	NA	NA	NA	NA	NA
SPAC323.03c	171.601	162.987	180.216	1.10571	0.144971	0.70282	0.85097	NA	NA	NA	NA	NA	NA	NA
SPAC323.04	1045.38	1076.19	1014.56	0.942729	-0.0850856	0.715333	0.858965	NA	NA	NA	1	NA	NA	NA
SPAC323.05c	288.551	278.942	298.161	1.0689	0.0961237	0.703946	0.852003	NA	NA	NA	NA	NA	NA	NA
SPAC323.06c	379.685	402.322	357.048	0.887469	-0.172232	0.517409	0.705701	NA	NA	NA	NA	NA	NA	NA
SPAC323.07c	646.353	630.543	662.163	1.05015	0.0705908	0.77065	0.896255	NA	NA	NA	NA	NA	NA	NA
SPAC323.08	150.61	157.057	144.164	0.917906	-0.123581	0.697215	0.846021	NA	NA	NA	NA	NA	NA	NA
SPAC328.01c	2993.01	2609.75	3376.27	1.29372	0.37152	0.06729	0.168187	NA	NA	NA	NA	NA	NA	NA
SPAC328.02	789.225	776.253	802.197	1.03342	0.0474288	0.833401	0.935623	NA	NA	NA	NA	NA	NA	NA
SPAC328.03	5019.38	3520.71	6518.06	1.85135	0.888576	8.49887e-05	0.000774161	NA	NA	1	NA	NA	NA	NA
SPAC328.04	623.507	546.934	700.081	1.28001	0.356155	0.12628	0.266932	NA	NA	NA	NA	NA	NA	NA
SPAC328.05	517.801	470.197	565.405	1.20249	0.266021	0.273268	0.467281	NA	NA	NA	NA	NA	1	NA
SPAC328.06	2984.31	2627.01	3341.6	1.27202	0.347118	0.0762311	0.184533	NA	NA	NA	NA	NA	NA	NA
SPAC328.07c	777.758	584.333	971.184	1.66204	0.732954	0.00154368	0.00877639	NA	NA	1	NA	NA	NA	NA
SPAC328.08c	135.897	114.339	157.456	1.3771	0.461632	0.165149	0.32476	NA	NA	NA	NA	NA	NA	NA
SPAC328.09	261.149	336.932	185.367	0.550162	-0.862072	0.00192417	0.0105711	NA	NA	1	NA	NA	NA	NA
SPAC328.10c	618.359	827.062	409.656	0.495315	-1.01358	8.23763e-06	0.000103918	NA	1	1	NA	NA	1	NA
SPAC32A11.01	513.662	262.907	764.417	2.90756	1.53981	4.48555e-10	1.60377e-08	1	NA	1	NA	NA	NA	NA
SPAC32A11.02c	3520.26	487.58	6552.95	13.4397	3.74843	0.010306	0.0400151	1	NA	1	NA	NA	NA	NA
SPAC32A11.03c	865.362	748.433	982.291	1.31246	0.392278	0.0637305	0.162262	NA	NA	NA	NA	NA	NA	1
SPAC32A11.04c	4652.05	5052.17	4251.94	0.841607	-0.248782	0.232188	0.414872	NA	NA	NA	NA	NA	1	NA
SPAC343.01c	666.378	836.485	496.272	0.593282	-0.753211	0.00113708	0.00688634	NA	NA	1	NA	NA	NA	NA
SPAC343.02	458.575	471.789	445.36	0.943981	-0.0831699	0.77946	0.903175	NA	NA	NA	NA	NA	NA	NA
SPAC343.03	102.775	89.8561	115.694	1.28755	0.364624	0.306942	0.505471	NA	NA	NA	NA	NA	NA	NA
SPAC343.04c	1000.57	781.972	1219.18	1.55911	0.640719	0.00267833	0.0138067	NA	NA	1	NA	NA	NA	NA
SPAC343.05	2776.7	2756.15	2797.25	1.01491	0.0213553	0.910895	0.977568	NA	NA	NA	NA	NA	NA	NA
SPAC343.06c	351.275	248.871	453.68	1.82295	0.866275	0.000883878	0.005523	NA	NA	1	NA	NA	NA	NA
SPAC343.07	20.8904	14.7838	26.997	1.82612	0.868784	0.329815	0.530209	NA	NA	NA	NA	NA	1	NA
SPAC343.08c	624.773	738.758	510.787	0.691414	-0.532379	0.021335	0.0704773	NA	NA	NA	NA	NA	1	NA
SPAC343.09	1404.5	1660.65	1148.34	0.6915	-0.532199	0.014453	0.0517304	NA	NA	NA	NA	NA	NA	NA
SPAC343.10	1228.25	1178.57	1277.92	1.08429	0.116754	0.592286	0.767099	NA	NA	NA	NA	NA	NA	NA
SPAC343.11c	1665.45	1356.38	1974.52	1.45573	0.541745	0.0088557	0.0354334	NA	NA	1	NA	NA	NA	NA
SPAC343.12	5132.29	2791.59	7472.99	2.67697	1.4206	0.0757364	0.183557	NA	NA	NA	NA	NA	NA	NA
SPAC343.13	362.934	374.126	351.742	0.94017	-0.0890063	0.65753	0.813216	NA	NA	NA	NA	NA	NA	NA
SPAC343.14c	913.015	1206.25	619.781	0.513809	-0.960697	1.00613e-05	0.000123658	NA	NA	1	NA	NA	1	NA
SPAC343.15	517.493	535.53	499.456	0.932638	-0.100611	0.708605	0.854585	NA	NA	NA	NA	NA	NA	NA
SPAC343.16	5182.59	5681.63	4683.54	0.82433	-0.278706	0.176753	0.340568	NA	NA	NA	NA	NA	NA	NA
SPAC343.17c	605.818	509.325	702.311	1.37891	0.463524	0.0508719	0.136818	NA	NA	NA	NA	NA	NA	NA
SPAC343.18	241.223	217.191	265.255	1.2213	0.288416	0.321468	0.521431	NA	NA	NA	NA	NA	NA	NA
SPAC343.19	744.414	677.745	811.082	1.19674	0.259105	0.28667	0.483521	NA	NA	NA	NA	NA	NA	NA
SPAC343.20	852.879	577.037	1128.72	1.95606	0.967952	0.0134574	0.0492752	NA	NA	1	NA	NA	NA	NA
SPAC343.21	77.8543	103.316	52.3925	0.50711	-0.97963	0.0285788	0.0882985	NA	NA	NA	NA	NA	NA	NA
SPAC3A11.02	934.805	803.237	1066.37	1.3276	0.408816	0.0672553	0.168187	NA	NA	NA	NA	NA	NA	NA
SPAC3A11.03	173.855	131.251	216.459	1.64921	0.721772	0.0172937	0.0598166	NA	NA	NA	NA	NA	NA	NA
SPAC3A11.04	93.2316	107.133	79.3299	0.740479	-0.43347	0.228019	0.409856	NA	NA	NA	NA	NA	NA	NA
SPAC3A11.05c	742.947	580.279	905.616	1.56066	0.642154	0.0044822	0.0205542	NA	NA	1	NA	NA	NA	NA
SPAC3A11.06	335.673	203.252	468.094	2.30302	1.20353	0.000483418	0.00337383	1	NA	1	NA	NA	NA	NA
SPAC3A11.07	4700.46	3320.61	6080.31	1.83108	0.872696	8.58907e-06	0.000107945	NA	NA	1	NA	NA	NA	NA
SPAC3A11.08	527.294	471.35	583.237	1.23738	0.307284	0.204834	0.38	NA	NA	NA	NA	NA	NA	NA
SPAC3A11.09	714.978	631.454	798.502	1.26454	0.338618	0.11658	0.252169	NA	NA	NA	NA	NA	NA	NA
SPAC3A11.10c	2441.36	1098.88	3783.84	3.44337	1.78382	0.0311205	0.0941694	NA	NA	NA	NA	NA	NA	NA
SPAC3A11.11c	566.883	464.251	669.515	1.44214	0.528212	0.0216105	0.0711762	NA	NA	NA	NA	NA	NA	NA
SPAC3A11.12c	3856.03	3662.88	4049.18	1.10546	0.144651	0.465999	0.663614	NA	NA	NA	NA	NA	NA	NA
SPAC3A11.13	175.98	209.149	142.811	0.682818	-0.550426	0.0653986	0.165189	NA	NA	NA	NA	NA	NA	NA
SPAC3A11.14c	502.604	507.156	498.052	0.982049	-0.0261337	0.921651	0.982853	NA	NA	NA	NA	NA	NA	NA
SPAC3A12.02	220.095	139.788	300.402	2.14898	1.10365	0.000118993	0.00101607	1	NA	1	NA	NA	NA	NA
SPAC3A12.03c	182.493	232.755	132.231	0.568109	-0.815759	0.0091114	0.0361536	NA	NA	1	NA	NA	NA	NA
SPAC3A12.04c	187.667	234.485	140.85	0.600679	-0.735334	0.0181327	0.0620229	NA	NA	NA	NA	NA	NA	NA
SPAC3A12.05c	1663.3	1545.53	1781.07	1.1524	0.204647	0.302701	0.500707	NA	NA	NA	NA	NA	NA	NA
SPAC3A12.06c	808.081	643.313	972.848	1.51225	0.596693	0.0114899	0.0435002	NA	NA	1	NA	NA	NA	NA
SPAC3A12.07	353.378	389.187	317.57	0.815983	-0.29339	0.246585	0.432948	NA	NA	NA	NA	NA	NA	NA
SPAC3A12.08	235.253	147.984	322.521	2.17943	1.12395	0.00282345	0.0143644	1	NA	1	NA	NA	NA	NA
SPAC3A12.09c	177.469	195.99	158.947	0.810994	-0.302236	0.319468	0.518942	NA	NA	NA	NA	NA	NA	NA
SPAC3A12.10	3279.55	4723.09	1836.01	0.38873	-1.36316	3.17492e-08	7.58125e-07	NA	1	1	NA	NA	NA	NA
SPAC3A12.11c	642.974	661.224	624.725	0.9448	-0.0819197	0.74298	0.87565	NA	NA	NA	NA	NA	1	NA
SPAC3A12.12	396.732	377.059	416.405	1.10435	0.1432	0.607446	0.777156	NA	NA	NA	NA	1	NA	NA
SPAC3A12.13c	1415.94	1657.41	1174.47	0.70862	-0.496916	0.0186931	0.0634104	NA	NA	NA	1	NA	1	NA
SPAC3A12.14	2523.33	2371.87	2674.78	1.12771	0.173394	0.406893	0.606844	NA	NA	NA	NA	NA	NA	NA
SPAC3A12.15	642.913	659.469	626.358	0.94979	-0.0743189	0.724692	0.865005	NA	NA	NA	NA	NA	NA	NA
SPAC3A12.16c	698.722	712.847	684.596	0.960369	-0.0583394	0.938953	0.992544	NA	NA	NA	NA	NA	NA	NA
SPAC3A12.17c	492.116	516.458	467.774	0.905735	-0.142839	0.600877	0.772737	NA	NA	NA	NA	NA	NA	NA
SPAC3A12.18	3915.99	3484.46	4347.52	1.24769	0.319258	0.103537	0.231959	NA	NA	NA	NA	NA	NA	NA
SPAC3A12.19	133.291	126.661	139.92	1.10468	0.143629	0.683119	0.834473	NA	NA	NA	NA	NA	NA	NA
SPAC3C7.01c	1196.7	1191.69	1201.72	1.00842	0.0120968	0.939771	0.992928	NA	NA	NA	NA	NA	NA	NA
SPAC3C7.02c	320.092	253.013	387.171	1.53024	0.613757	0.359569	0.560653	NA	NA	NA	NA	NA	NA	NA
SPAC3C7.03c	189.764	152.119	227.409	1.49495	0.580095	0.0505227	0.136153	NA	NA	NA	NA	1	NA	NA
SPAC3C7.04	1374.1	1266.29	1481.92	1.17029	0.226865	0.270817	0.464754	NA	NA	NA	NA	NA	NA	1
SPAC3C7.05c	871.374	336.452	1406.29	4.17977	2.06342	0.0353755	0.103874	NA	NA	NA	NA	NA	NA	NA
SPAC3C7.06c	369.496	353.559	385.432	1.09015	0.124526	0.651881	0.809373	NA	NA	NA	NA	NA	NA	NA
SPAC3C7.07c	309.036	328.395	289.677	0.882099	-0.180987	0.504183	0.694186	NA	NA	NA	NA	NA	NA	NA
SPAC3C7.08c	4075.63	5897.94	2253.31	0.382051	-1.38816	1.07242e-11	5.23372e-10	NA	1	1	NA	NA	NA	NA
SPAC3C7.09	126.884	132.266	121.502	0.918617	-0.122464	0.675018	0.827346	NA	NA	NA	NA	NA	NA	NA
SPAC3C7.10	431.355	420.209	442.501	1.05305	0.0745745	0.726856	0.865479	NA	NA	NA	NA	NA	NA	NA
SPAC3C7.11c	14692.6	15381.7	14003.5	0.910398	-0.135431	0.461647	0.658961	NA	NA	NA	NA	NA	NA	NA
SPAC3C7.12	979.619	987.595	971.644	0.983848	-0.0234925	0.85589	0.949274	NA	NA	NA	NA	NA	NA	NA
SPAC3C7.13c	1834.33	311.645	3357.01	10.7719	3.4292	0.02363	0.0761399	NA	NA	NA	NA	NA	NA	NA
SPAC3C7.14c	2413.79	3490.8	1336.79	0.382948	-1.38478	2.26344e-11	1.03653e-09	NA	1	1	NA	NA	NA	NA
SPAC3F10.02c	1117.82	1115.82	1119.82	1.00359	0.00516339	0.988705	1	NA	NA	NA	NA	NA	NA	NA
SPAC3F10.03	5160.58	6224.31	4096.86	0.658202	-0.603397	0.00578548	0.0253153	NA	NA	1	NA	NA	NA	NA
SPAC3F10.04	1609.17	1666.37	1551.98	0.931358	-0.102592	0.61105	0.780118	NA	NA	NA	1	NA	NA	NA
SPAC3F10.05c	667.069	748.286	585.851	0.782924	-0.353055	0.126071	0.266694	NA	NA	NA	NA	1	NA	NA
SPAC3F10.06c	933.267	954.511	912.023	0.955487	-0.0656915	0.764363	0.891526	NA	NA	NA	NA	1	NA	NA
SPAC3F10.07c	273.535	229.546	317.524	1.38327	0.468084	0.168533	0.329628	NA	NA	NA	NA	NA	NA	NA
SPAC3F10.08c	511.67	628.521	394.818	0.62817	-0.670774	0.00560738	0.0246651	NA	NA	1	NA	NA	NA	NA
SPAC3F10.09	817.332	868.709	765.955	0.881717	-0.181612	0.43724	0.635519	NA	NA	NA	NA	NA	NA	NA
SPAC3F10.10c	110.501	116.954	104.048	0.889645	-0.168698	0.683826	0.834774	NA	NA	NA	NA	NA	NA	NA
SPAC3F10.11c	2454.34	2739.21	2169.46	0.792001	-0.336425	0.105196	0.234994	NA	NA	NA	NA	NA	NA	NA
SPAC3F10.12c	405.417	552.962	257.872	0.466347	-1.10053	1.0816e-05	0.000131244	NA	1	1	NA	NA	NA	1
SPAC3F10.13	1720.75	1751.99	1689.51	0.964339	-0.052387	0.784809	0.907399	NA	NA	NA	NA	NA	NA	NA
SPAC3F10.15c	189.946	186.641	193.252	1.03542	0.0502176	0.894437	0.973172	NA	NA	NA	NA	NA	NA	NA
SPAC3F10.16c	1101.68	1489.03	714.317	0.479719	-1.05974	1.03207e-06	1.74253e-05	NA	1	1	NA	NA	NA	NA
SPAC3F10.17	851.708	1085.92	617.492	0.568632	-0.814432	0.00024347	0.0018785	NA	NA	1	NA	NA	NA	NA
SPAC3F10.18c	1972.31	2768.74	1175.89	0.424701	-1.23548	8.83543e-08	1.94321e-06	NA	1	1	NA	NA	NA	NA
SPAC3F10.19	950.865	741.446	1160.29	1.56489	0.646066	0.00327867	0.0161948	NA	NA	1	NA	NA	NA	NA
SPAC3G6.01	2681.67	2800.71	2562.62	0.914989	-0.128173	0.561592	0.743379	NA	NA	NA	NA	NA	NA	NA
SPAC3G6.02	875.233	953.683	796.784	0.835481	-0.259321	0.237265	0.42123	NA	NA	NA	NA	NA	NA	NA
SPAC3G6.03c	351.745	348.288	355.203	1.01986	0.0283662	0.915402	0.980574	NA	NA	NA	NA	NA	NA	NA
SPAC3G6.04	562.08	729.587	394.573	0.540817	-0.886789	0.000153626	0.0012634	NA	NA	1	NA	NA	1	NA
SPAC3G6.05	390.895	475.452	306.338	0.64431	-0.634174	0.0113568	0.043143	NA	NA	1	NA	NA	NA	NA
SPAC3G6.06c	243.797	305.691	181.903	0.595053	-0.74891	0.0106199	0.0409721	NA	NA	1	NA	NA	NA	NA
SPAC3G6.07	22.9389	4.11018	41.7676	10.162	3.34511	0.0767629	0.185686	NA	NA	NA	NA	NA	NA	NA
SPAC3G6.08	233.717	281.428	186.007	0.660942	-0.597405	0.0326387	0.0974208	NA	NA	NA	NA	NA	NA	NA
SPAC3G6.09c	1199.78	1072.79	1326.77	1.23675	0.306554	0.14696	0.298022	NA	NA	NA	NA	NA	NA	NA
SPAC3G6.10c	111.213	121.576	100.851	0.829529	-0.269636	0.440716	0.638767	NA	NA	NA	NA	NA	NA	NA
SPAC3G6.11	375.644	429.412	321.876	0.749575	-0.415855	0.104506	0.233688	NA	NA	NA	NA	NA	NA	NA
SPAC3G6.13c	4770.53	6170.71	3370.35	0.546186	-0.872536	1.32147e-05	0.000155186	NA	NA	1	NA	NA	NA	NA
SPAC3G9.01	254.257	259.553	248.962	0.959195	-0.0601041	0.867725	0.955469	NA	NA	NA	NA	NA	NA	NA
SPAC3G9.02	89.1533	83.7962	94.5105	1.12786	0.17359	0.706444	0.853678	NA	NA	NA	NA	NA	NA	NA
SPAC3G9.03	3142.95	4383.76	1902.15	0.433908	-1.20454	1.04077e-05	0.000127214	NA	1	1	NA	NA	NA	NA
SPAC3G9.04	241.884	251.689	232.079	0.922085	-0.117028	0.658211	0.813757	NA	NA	NA	NA	NA	NA	NA
SPAC3G9.05	830.273	707.712	952.834	1.34636	0.429062	0.0500234	0.135134	NA	NA	NA	NA	NA	NA	NA
SPAC3G9.06	2317.06	2824.78	1809.34	0.640524	-0.642676	0.00165463	0.00931215	NA	NA	1	NA	NA	1	NA
SPAC3G9.07c	198.051	228.166	167.936	0.736025	-0.442174	0.151289	0.304307	NA	NA	NA	NA	NA	NA	NA
SPAC3G9.08	174.909	181.385	168.433	0.928594	-0.106879	0.715316	0.858965	NA	NA	NA	NA	NA	NA	NA
SPAC3G9.09c	2816.01	3798.07	1833.95	0.482863	-1.05031	1.26195e-06	2.0579e-05	NA	1	1	NA	NA	1	NA
SPAC3G9.10c	411.81	463.268	360.352	0.777848	-0.36244	0.149444	0.301645	NA	NA	NA	NA	NA	NA	NA
SPAC3G9.11c	5576.79	89.3847	11064.2	123.782	6.95165	0.0237068	0.0762403	NA	NA	NA	NA	NA	NA	NA
SPAC3G9.12	1380.31	1193.72	1566.9	1.31262	0.392445	0.0636008	0.162075	NA	NA	NA	NA	NA	NA	NA
SPAC3G9.13c	486.803	421.711	551.895	1.3087	0.38814	0.101563	0.228713	NA	NA	NA	NA	NA	NA	NA
SPAC3G9.14	1552.42	1606.99	1497.84	0.932078	-0.101477	0.602067	0.773357	NA	NA	NA	NA	NA	NA	1
SPAC3G9.15c	587.201	711.652	462.751	0.650249	-0.620936	0.00851287	0.0344326	NA	NA	1	NA	NA	NA	NA
SPAC3G9.16c	65.3851	72.4566	58.3136	0.804807	-0.313285	0.465295	0.662753	NA	NA	NA	NA	NA	NA	NA
SPAC3G9.17	64.5791	72.9601	56.1981	0.770259	-0.376585	0.346719	0.54802	NA	NA	NA	NA	NA	NA	NA
SPAC3H1.01c	521.882	576.509	467.254	0.810487	-0.303138	0.179928	0.344937	NA	NA	NA	NA	NA	NA	NA
SPAC3H1.02c	1386.07	1580.41	1191.73	0.754062	-0.407245	0.0513555	0.137676	NA	NA	NA	NA	NA	NA	NA
SPAC3H1.03	117.569	119.586	115.552	0.966269	-0.0495027	0.924836	0.984783	NA	NA	NA	NA	NA	NA	NA
SPAC3H1.04c	626.974	587.053	666.895	1.13601	0.18397	0.463512	0.660776	NA	NA	NA	NA	NA	NA	NA
SPAC3H1.05	1971.78	2094.24	1849.32	0.883051	-0.179432	0.355403	0.557491	NA	NA	NA	NA	NA	NA	NA
SPAC3H1.06c	830.645	679.817	981.473	1.44373	0.529801	0.0171469	0.0593703	NA	NA	NA	NA	NA	NA	NA
SPAC3H1.07	8371.66	10423.2	6320.11	0.606349	-0.72178	0.0291047	0.0895095	NA	NA	NA	NA	NA	NA	NA
SPAC3H1.08c	277.709	268.463	286.955	1.06888	0.0961012	0.752429	0.881743	NA	NA	NA	NA	NA	NA	NA
SPAC3H1.09c	1375.85	1591.24	1160.46	0.72928	-0.455456	0.0308646	0.0937753	NA	NA	NA	NA	NA	NA	NA
SPAC3H1.10	258.299	306.714	209.883	0.684295	-0.54731	0.0480867	0.130694	NA	NA	NA	NA	NA	NA	NA
SPAC3H1.11	1935.07	1844.63	2025.51	1.09806	0.134955	0.510402	0.699723	NA	NA	NA	NA	NA	NA	1
SPAC3H1.12c	573.443	486.256	660.631	1.35861	0.442128	0.0516069	0.138183	NA	NA	NA	NA	NA	NA	NA
SPAC3H1.13	167.969	153.109	182.829	1.19411	0.255931	0.403547	0.604494	NA	NA	NA	NA	NA	NA	NA
SPAC3H1.14	131.122	118.774	143.47	1.20793	0.272532	0.419234	0.6174	NA	NA	NA	NA	NA	NA	NA
SPAC3H5.04	521.405	444.105	598.704	1.34811	0.430941	0.0786595	0.188907	NA	NA	NA	NA	NA	NA	NA
SPAC3H5.05c	513.179	844.357	182.001	0.215549	-2.21391	2.67156e-19	3.72126e-17	NA	1	1	NA	NA	NA	NA
SPAC3H5.06c	2407.46	2600.14	2214.78	0.851795	-0.231422	0.232054	0.414843	NA	NA	NA	NA	NA	NA	NA
SPAC3H5.07	6579.98	9020.46	4139.51	0.458902	-1.12374	9.1104e-07	1.58213e-05	NA	1	1	NA	NA	NA	NA
SPAC3H5.08c	1427.67	1510.44	1344.9	0.890403	-0.167469	0.426949	0.624635	NA	NA	NA	1	NA	NA	NA
SPAC3H5.09c	3944.25	3268.6	4619.89	1.41342	0.499187	0.0109281	0.0419917	NA	NA	NA	NA	NA	NA	NA
SPAC3H5.10	4568.08	6279.83	2856.33	0.454841	-1.13656	3.46061e-06	5.01901e-05	NA	1	1	NA	NA	NA	NA
SPAC3H5.11	397.706	352.219	443.194	1.25829	0.331463	0.173738	0.33758	NA	NA	NA	NA	NA	NA	NA
SPAC3H5.12c	3204.88	4245.43	2164.34	0.509804	-0.971986	9.14527e-05	0.000813102	NA	NA	1	NA	NA	1	NA
SPAC3H5.13	131.975	140.608	123.343	0.877206	-0.189013	0.640225	0.799952	NA	NA	NA	NA	NA	NA	NA
SPAC3H8.02	2194.57	2488.31	1900.82	0.763902	-0.388541	0.0534997	0.142339	NA	NA	NA	NA	NA	NA	NA
SPAC3H8.03	213.675	224.908	202.442	0.900111	-0.151825	0.608931	0.778305	NA	NA	NA	NA	NA	NA	NA
SPAC3H8.04	372.949	344.153	401.745	1.16734	0.223228	0.355246	0.557424	NA	NA	NA	NA	NA	NA	NA
SPAC3H8.05c	937.511	852.812	1022.21	1.19864	0.261393	0.236637	0.420563	NA	NA	NA	NA	NA	NA	NA
SPAC3H8.06	1505.73	1193.67	1817.8	1.52287	0.606791	0.00879491	0.035317	NA	NA	1	NA	NA	NA	NA
SPAC3H8.07c	236.71	247.571	225.849	0.912257	-0.132488	0.65813	0.813757	NA	NA	NA	NA	NA	NA	NA
SPAC3H8.08c	379.924	384.589	375.258	0.975738	-0.0354337	0.900539	0.973172	NA	NA	NA	NA	NA	NA	1
SPAC3H8.09c	177.469	225.079	129.859	0.576951	-0.793479	0.00924654	0.0365214	NA	NA	1	1	NA	1	NA
SPAC3H8.10	2591.09	2767.48	2414.69	0.872524	-0.196733	0.331518	0.532052	NA	NA	NA	NA	NA	NA	NA
SPAC458.02c	4161.62	4610.12	3713.12	0.805428	-0.312173	0.105994	0.236224	NA	NA	NA	NA	NA	NA	NA
SPAC458.03	485.119	416.927	553.311	1.32712	0.408296	0.0800064	0.191249	NA	NA	NA	NA	NA	NA	NA
SPAC458.04c	78.1386	38.1209	118.156	3.09951	1.63204	0.000161305	0.00131683	1	NA	1	NA	NA	NA	NA
SPAC458.05	615.512	447.419	783.604	1.75139	0.808498	0.000677072	0.00446	NA	NA	1	NA	NA	NA	NA
SPAC458.06	223.374	195.495	251.253	1.28522	0.362012	0.202335	0.376514	NA	NA	NA	NA	NA	NA	NA
SPAC458.07	518.396	501.218	535.573	1.06854	0.0956446	0.670019	0.823181	NA	NA	NA	NA	NA	NA	NA
SPAC4A8.02c	642.915	564.016	721.813	1.27977	0.355888	0.125025	0.265035	NA	NA	NA	NA	NA	NA	NA
SPAC4A8.03c	468.303	420.574	516.032	1.22697	0.295103	0.221908	0.402407	NA	NA	NA	NA	NA	NA	NA
SPAC4A8.04	5725.51	1282.81	10168.2	7.92653	2.98669	0.00600456	0.026137	1	NA	1	NA	1	NA	NA
SPAC4A8.05c	3066.55	2992.79	3140.3	1.04929	0.0694109	0.758345	0.886725	NA	NA	NA	NA	NA	NA	NA
SPAC4A8.06c	557.22	745.175	369.266	0.495542	-1.01292	1.64237e-05	0.000185801	NA	1	1	NA	NA	NA	NA
SPAC4A8.07c	521.653	627.733	415.573	0.662021	-0.595051	0.0123238	0.0458269	NA	NA	1	NA	NA	NA	NA
SPAC4A8.08c	858.335	735.841	980.83	1.33294	0.414608	0.0608591	0.157349	NA	NA	NA	NA	NA	NA	NA
SPAC4A8.09c	1074.03	999.171	1148.9	1.14985	0.201447	0.34913	0.550149	NA	NA	NA	NA	NA	NA	NA
SPAC4A8.10	1345.41	965.891	1724.93	1.78584	0.836604	8.83803e-05	0.00079745	NA	NA	1	NA	NA	NA	NA
SPAC4A8.11c	23424.8	24677.4	22172.2	0.898483	-0.154437	0.592581	0.767099	NA	NA	NA	NA	NA	NA	NA
SPAC4A8.12c	418.993	358.327	479.659	1.33861	0.420731	0.0958278	0.218895	NA	NA	NA	NA	NA	NA	NA
SPAC4A8.13c	765.179	675.033	855.324	1.26708	0.341512	0.121155	0.258965	NA	NA	NA	NA	NA	NA	NA
SPAC4A8.14	1049.91	1193.16	906.649	0.759869	-0.396177	0.0696507	0.172668	NA	NA	NA	NA	NA	NA	NA
SPAC4A8.15c	1561.74	1548.17	1575.31	1.01753	0.0250747	0.877989	0.962491	NA	NA	NA	NA	NA	NA	NA
SPAC4A8.16c	15797.4	18678.5	12916.2	0.691502	-0.532195	0.0061604	0.0266938	NA	NA	1	NA	NA	1	NA
SPAC4C5.01	315.758	439.598	191.919	0.436578	-1.19569	6.56301e-06	8.60398e-05	NA	1	1	NA	NA	NA	NA
SPAC4C5.02c	687.558	726.175	648.94	0.893642	-0.162231	0.460666	0.657879	NA	NA	NA	NA	NA	NA	NA
SPAC4C5.03	710.014	606.41	813.618	1.3417	0.424058	0.0637295	0.162262	NA	NA	NA	NA	NA	NA	NA
SPAC4C5.04	288.261	287.666	288.857	1.00414	0.0059594	0.995994	1	NA	NA	NA	NA	NA	NA	NA
SPAC4D7.01c	2490.45	2344.26	2636.65	1.12472	0.169572	0.383512	0.584623	NA	NA	NA	NA	NA	NA	NA
SPAC4D7.02c	1079.31	333	1825.62	5.48234	2.45479	1.46139e-05	0.000169338	1	NA	1	NA	NA	NA	NA
SPAC4D7.03	499.495	562.668	436.321	0.77545	-0.366894	0.12529	0.265512	NA	NA	NA	NA	NA	NA	NA
SPAC4D7.04c	354.185	389.365	319.004	0.819292	-0.28755	0.246709	0.433053	NA	NA	NA	NA	NA	NA	NA
SPAC4D7.05	3335.03	3918.61	2751.46	0.702153	-0.510143	0.0110884	0.042551	NA	NA	1	NA	NA	1	NA
SPAC4D7.06c	237.164	236.085	238.242	1.00914	0.0131204	0.984928	1	NA	NA	NA	NA	NA	NA	NA
SPAC4D7.07c	453.888	496.661	411.115	0.827758	-0.272719	0.241345	0.426662	NA	NA	NA	NA	NA	NA	NA
SPAC4D7.08c	3722.47	5210.62	2234.31	0.428798	-1.22163	9.75329e-07	1.66779e-05	NA	1	1	NA	NA	NA	NA
SPAC4D7.09	1111.63	1398.82	824.431	0.589376	-0.76274	0.00043458	0.00307146	NA	NA	1	NA	NA	1	NA
SPAC4D7.10c	786.425	625.962	946.889	1.51269	0.59712	0.00833668	0.0340287	NA	NA	1	NA	NA	NA	NA
SPAC4D7.11	372.226	267.448	477.004	1.78354	0.834742	0.000925248	0.00573328	NA	NA	1	NA	NA	NA	NA
SPAC4D7.12c	324.034	432.182	215.886	0.499525	-1.00137	0.000183664	0.00147771	NA	1	1	NA	NA	NA	NA
SPAC4D7.13	1358	1330.63	1385.36	1.04113	0.0581552	0.752264	0.881743	NA	NA	NA	NA	NA	1	NA
SPAC4D7.14	110.758	127.141	94.375	0.742289	-0.429948	0.259665	0.450493	NA	NA	NA	NA	NA	NA	NA
SPAC4D7.15	15.6273	18.902	12.3526	0.653507	-0.613725	0.420548	0.618111	NA	NA	NA	NA	NA	NA	NA
SPAC4F10.02	1021.92	601.154	1442.69	2.39987	1.26296	8.2973e-09	2.20355e-07	1	NA	1	NA	NA	NA	NA
SPAC4F10.03c	323.298	364.193	282.403	0.775422	-0.366946	0.1763	0.340336	NA	NA	NA	NA	NA	NA	NA
SPAC4F10.04	255.481	300.931	210.031	0.697938	-0.518829	0.0712526	0.175491	NA	NA	NA	NA	NA	NA	NA
SPAC4F10.05c	42.8823	38.9333	46.8312	1.20286	0.266466	0.624453	0.789129	NA	NA	NA	NA	NA	NA	NA
SPAC4F10.06	905.266	1152.57	657.958	0.57086	-0.808792	0.000269298	0.0020322	NA	NA	1	NA	NA	NA	NA
SPAC4F10.07c	1098.3	637.221	1559.37	2.44715	1.2911	0.003468	0.0169002	1	NA	1	NA	NA	NA	NA
SPAC4F10.08	58.8262	50.7603	66.8921	1.3178	0.398134	0.374871	0.576701	NA	NA	NA	NA	NA	NA	NA
SPAC4F10.09c	1895.61	2570.24	1220.98	0.475044	-1.07387	2.94877e-07	5.76475e-06	NA	1	1	NA	NA	NA	NA
SPAC4F10.10c	1021.83	1086.92	956.731	0.880219	-0.184065	0.385316	0.586285	NA	NA	NA	NA	NA	NA	NA
SPAC4F10.11	641.898	625.264	658.531	1.05321	0.0747874	0.741761	0.875448	NA	NA	NA	NA	NA	NA	NA
SPAC4F10.12	132.745	140.949	124.541	0.883586	-0.178558	0.607908	0.777478	NA	NA	NA	NA	NA	NA	NA
SPAC4F10.13c	2651.91	2613.18	2690.63	1.02964	0.0421414	0.812866	0.924154	NA	NA	NA	NA	NA	NA	NA
SPAC4F10.14c	9349.06	12495.4	6202.74	0.496402	-1.01042	5.01703e-05	0.000490408	NA	1	1	NA	NA	NA	NA
SPAC4F10.15c	1217.4	878.253	1556.55	1.77233	0.825647	0.0922624	0.212566	NA	NA	NA	NA	NA	NA	NA
SPAC4F10.16c	1125.85	947.372	1304.34	1.37679	0.461312	0.45129	0.648747	NA	NA	NA	NA	NA	NA	NA
SPAC4F10.17	511.959	19.7224	1004.2	50.9165	5.67006	0.109678	0.242176	NA	NA	NA	NA	NA	NA	NA
SPAC4F10.18	1087.19	1149.48	1024.91	0.89163	-0.165483	0.442853	0.641005	NA	NA	NA	NA	NA	NA	NA
SPAC4F10.19c	119.581	167.089	72.0725	0.431342	-1.21309	0.00041689	0.00297473	NA	1	1	NA	NA	NA	NA
SPAC4F10.20	1815.55	1528.19	2102.9	1.37607	0.460555	0.0304026	0.0928604	NA	NA	NA	NA	NA	NA	NA
SPAC4F10.22	35.8898	18.8859	52.8937	2.80069	1.48578	0.184567	0.351771	NA	NA	NA	NA	NA	NA	NA
SPAC4F8.01	824.468	678.672	970.263	1.42965	0.515662	0.01942	0.0654448	NA	NA	NA	NA	NA	NA	NA
SPAC4F8.02c	559.384	573.505	545.263	0.950755	-0.0728539	0.764371	0.891526	NA	NA	NA	NA	NA	NA	NA
SPAC4F8.03	719.283	941.442	497.123	0.528044	-0.92127	5.85826e-05	0.000560348	NA	NA	1	NA	1	NA	NA
SPAC4F8.04	560.627	748.928	372.326	0.497146	-1.00826	2.31522e-05	0.000250074	NA	1	1	NA	NA	1	NA
SPAC4F8.05c	237.141	267.603	206.68	0.77234	-0.372692	0.194919	0.3666	NA	NA	NA	NA	NA	NA	NA
SPAC4F8.06	230.28	219.32	241.241	1.09995	0.137438	0.637081	0.797664	NA	NA	NA	NA	NA	NA	NA
SPAC4F8.07c	21275.2	15041.3	27509.2	1.82891	0.870981	0.00011559	0.000994641	NA	NA	1	NA	NA	NA	NA
SPAC4F8.08	18.158	9.53625	26.7797	2.8082	1.48965	0.103774	0.232285	NA	NA	NA	NA	NA	NA	NA
SPAC4F8.10c	414.897	368.359	461.436	1.25268	0.325017	0.205112	0.380186	NA	NA	NA	NA	NA	NA	NA
SPAC4F8.11	523.701	425.464	621.937	1.46179	0.547732	0.0181434	0.0620229	NA	NA	NA	NA	NA	NA	NA
SPAC4F8.12c	5876.21	5453.25	6299.18	1.15512	0.208048	0.258337	0.449218	NA	NA	NA	NA	NA	1	NA
SPAC4F8.13c	2111.41	1834.94	2387.88	1.30134	0.379994	0.0642217	0.162955	NA	NA	NA	NA	NA	NA	NA
SPAC4F8.14c	2930.5	3616.66	2244.34	0.620555	-0.688369	0.00197407	0.0108097	NA	NA	1	NA	NA	NA	NA
SPAC4F8.15	729.921	684.269	775.574	1.13343	0.180701	0.42198	0.619492	NA	NA	NA	NA	NA	NA	NA
SPAC4G8.02c	390.127	458.223	322.031	0.702781	-0.508853	0.0359986	0.105195	NA	NA	NA	NA	NA	NA	NA
SPAC4G8.03c	480.134	449.036	511.231	1.13851	0.187145	0.486731	0.679959	NA	NA	NA	NA	NA	1	NA
SPAC4G8.04	1632.89	1204.48	2061.3	1.71137	0.775148	0.0287431	0.0886832	NA	NA	NA	NA	NA	NA	NA
SPAC4G8.05	773.993	644.499	903.488	1.40185	0.487328	0.0285449	0.0882344	NA	NA	NA	NA	NA	NA	NA
SPAC4G8.06c	467.072	621.3	312.843	0.50353	-0.989849	4.82437e-05	0.000473652	NA	NA	1	NA	NA	NA	NA
SPAC4G8.07c	476.487	575.121	377.854	0.656998	-0.606039	0.0130637	0.0481766	NA	NA	1	NA	NA	NA	NA
SPAC4G8.08	218.112	201.888	234.336	1.16072	0.215024	0.431688	0.629777	NA	NA	NA	NA	NA	NA	NA
SPAC4G8.09	700.586	682.369	718.804	1.05339	0.0750462	0.694579	0.844049	NA	NA	NA	NA	NA	1	NA
SPAC4G8.10	238.049	154.758	321.339	2.07639	1.05408	0.000210574	0.00166315	1	NA	1	NA	NA	NA	NA
SPAC4G8.11c	67.3725	60.8001	73.945	1.2162	0.282379	0.590733	0.766772	NA	NA	NA	1	NA	NA	NA
SPAC4G8.12c	280.449	248.075	312.824	1.26101	0.334575	0.21649	0.395155	NA	NA	NA	NA	NA	NA	NA
SPAC4G8.13c	1104.47	860.033	1348.9	1.56843	0.649323	0.0142207	0.0512281	NA	NA	NA	NA	NA	NA	1
SPAC4G9.02	376.665	378.838	374.492	0.988528	-0.016646	0.965387	1	NA	NA	NA	NA	NA	1	NA
SPAC4G9.03	2358.46	3476.46	1240.46	0.356817	-1.48675	1.05319e-12	6.17687e-11	NA	1	1	NA	NA	NA	NA
SPAC4G9.04c	1654.77	1481.98	1827.56	1.23319	0.30239	0.133466	0.278425	NA	NA	NA	NA	NA	NA	NA
SPAC4G9.05	38.5485	24.1495	52.9474	2.19248	1.13256	0.0891917	0.20771	NA	NA	NA	NA	NA	1	NA
SPAC4G9.06c	973.222	965.249	981.195	1.01652	0.0236393	0.961829	1	NA	NA	NA	NA	NA	NA	NA
SPAC4G9.07	32.1973	20.6973	43.6972	2.11125	1.0781	0.075623	0.18346	NA	NA	NA	NA	NA	NA	NA
SPAC4G9.08c	1565.07	1804.72	1325.42	0.734418	-0.445327	0.0366087	0.106513	NA	NA	NA	NA	NA	NA	NA
SPAC4G9.09c	2829.14	2935.91	2722.37	0.927266	-0.108946	0.601877	0.773325	NA	NA	NA	NA	NA	NA	NA
SPAC4G9.10	433.047	499.61	366.485	0.733542	-0.447049	0.0620336	0.159399	NA	NA	NA	NA	NA	NA	NA
SPAC4G9.11c	848.158	591.594	1104.72	1.86736	0.901003	0.00620326	0.0268506	NA	NA	1	NA	NA	NA	NA
SPAC4G9.12	3661.65	895.027	6428.27	7.18221	2.84443	3.7257e-42	2.26455e-39	1	NA	1	NA	NA	NA	NA
SPAC4G9.13c	366.974	304.781	429.167	1.40812	0.493768	0.0588823	0.153544	NA	NA	NA	NA	NA	NA	NA
SPAC4G9.14	217.41	223.259	211.56	0.9476	-0.07765	0.798677	0.915159	NA	NA	NA	NA	NA	NA	NA
SPAC4G9.15	1211.02	1201.68	1220.35	1.01553	0.0222331	0.872283	0.957986	NA	NA	NA	NA	NA	NA	NA
SPAC4G9.16c	9361.32	12558	6164.62	0.490891	-1.02653	2.57847e-05	0.000272779	NA	1	1	NA	NA	1	NA
SPAC4G9.17c	444.186	416.285	472.086	1.13405	0.181479	0.446165	0.64427	NA	NA	NA	NA	NA	1	NA
SPAC4G9.19	243.908	123.558	364.257	2.94807	1.55977	0.00126855	0.00750578	1	NA	1	NA	NA	NA	NA
SPAC4G9.20c	289.824	353.69	225.959	0.638864	-0.646419	0.0158938	0.0560772	NA	NA	NA	NA	1	NA	NA
SPAC4G9.22	498.974	465.095	532.852	1.14568	0.196207	0.404181	0.604824	NA	NA	NA	NA	NA	NA	NA
SPAC4H3.01	2223.74	3030.89	1416.59	0.467386	-1.09731	8.34953e-08	1.86083e-06	NA	1	1	NA	NA	NA	NA
SPAC4H3.02c	321.425	297.974	344.875	1.1574	0.210885	0.373734	0.576416	NA	NA	NA	NA	NA	NA	NA
SPAC4H3.03c	1591.16	98.921	3083.4	31.1703	4.9621	1.85908e-05	0.000206476	1	NA	1	NA	NA	NA	NA
SPAC4H3.04c	181.61	59.3137	303.907	5.12372	2.35719	0.00900754	0.0358692	1	NA	1	NA	NA	NA	NA
SPAC4H3.05	335.659	347.491	323.827	0.9319	-0.101753	0.662946	0.817065	NA	NA	NA	NA	NA	NA	NA
SPAC4H3.06	197.824	273.695	121.952	0.445579	-1.16625	8.74929e-05	0.00079158	NA	1	1	NA	NA	NA	NA
SPAC4H3.07c	1083.76	1208.57	958.942	0.79345	-0.333788	0.101151	0.22794	NA	NA	NA	NA	NA	NA	NA
SPAC4H3.08	920.202	149.697	1690.71	11.2942	3.49751	0.00572713	0.0250928	1	NA	1	NA	NA	NA	NA
SPAC4H3.09	268.288	244.135	292.442	1.19787	0.260469	0.356367	0.557805	NA	NA	NA	NA	NA	NA	NA
SPAC4H3.10c	55228.2	72376.7	38079.6	0.526131	-0.926506	0.000220916	0.00172351	NA	NA	1	NA	NA	NA	NA
SPAC4H3.11c	1358.89	1258.63	1459.14	1.15931	0.213262	0.320714	0.520587	NA	NA	NA	NA	NA	NA	NA
SPAC4H3.12c	90.059	115.045	65.0733	0.565635	-0.822058	0.174874	0.338999	NA	NA	NA	NA	NA	NA	NA
SPAC4H3.13	135.233	139.178	131.288	0.943307	-0.0842002	0.717574	0.860883	NA	NA	NA	NA	NA	NA	NA
SPAC4H3.14c	327.353	389.821	264.886	0.679508	-0.557437	0.0362799	0.105859	NA	NA	NA	NA	NA	NA	NA
SPAC4H3.16	500.284	488.952	511.616	1.04635	0.0653671	0.834634	0.936145	NA	NA	NA	NA	NA	NA	NA
SPAC4H3.17	7.30573	8.87027	5.74118	0.647239	-0.62763	0.679273	0.831342	NA	NA	NA	NA	NA	NA	NA
SPAC513.01c	316.971	345.648	288.294	0.834067	-0.261764	0.515941	0.704716	NA	NA	NA	NA	NA	1	NA
SPAC513.02	226.6	58.3147	394.885	6.77162	2.7595	0.0411393	0.116491	NA	NA	NA	NA	NA	NA	NA
SPAC513.03	868.094	113.689	1622.5	14.2714	3.83506	4.75993e-53	3.99087e-50	1	NA	1	NA	NA	NA	NA
SPAC513.04	1.73403	0	3.46807	Inf	Inf	0.348949	0.550149	NA	NA	NA	NA	NA	NA	NA
SPAC513.05	1721.66	885.043	2558.27	2.89056	1.53135	0.000321065	0.00235636	1	NA	1	NA	NA	NA	NA
SPAC513.06c	492.498	300.971	684.026	2.27273	1.18442	0.0324392	0.0970851	NA	NA	NA	NA	NA	NA	NA
SPAC513.07	462.084	551.126	373.042	0.676873	-0.563043	0.023341	0.0754268	NA	NA	NA	NA	NA	NA	NA
SPAC521.02	709.026	776.05	642.002	0.827268	-0.273573	0.238169	0.422612	NA	NA	NA	NA	NA	NA	NA
SPAC521.03	925.295	778.413	1072.18	1.37739	0.461935	0.0358731	0.104966	NA	NA	NA	NA	NA	NA	NA
SPAC521.04c	1227.33	883.168	1571.49	1.77938	0.831371	7.92464e-05	0.000724817	NA	NA	1	NA	NA	NA	NA
SPAC521.05	3955.93	5321.46	2590.4	0.486783	-1.03865	3.02985e-05	0.000316525	NA	1	1	NA	NA	NA	NA
SPAC56E4.02c	112.138	90.5301	133.747	1.47737	0.563034	0.129347	0.272039	NA	NA	NA	NA	NA	NA	NA
SPAC56E4.03	1702.53	2110.7	1294.36	0.613235	-0.705488	0.000677969	0.00446152	NA	NA	1	NA	NA	NA	NA
SPAC56E4.04c	33220	31181.4	35258.6	1.13076	0.177289	0.400566	0.603003	NA	NA	NA	NA	NA	NA	NA
SPAC56E4.05	412.005	393.947	430.063	1.09168	0.126547	0.601201	0.772857	NA	NA	NA	NA	NA	NA	NA
SPAC56E4.06c	702.731	566.616	838.847	1.48045	0.566036	0.0117092	0.0441059	NA	NA	1	NA	NA	NA	NA
SPAC56E4.07	413.158	561.158	265.157	0.472518	-1.08156	1.82304e-05	0.00020281	NA	1	1	NA	NA	NA	NA
SPAC56F8.02	1054.23	1128.74	979.726	0.867981	-0.204264	0.37184	0.574693	NA	NA	NA	NA	NA	NA	NA
SPAC56F8.03	7653.54	8539.61	6767.47	0.79248	-0.335553	0.102539	0.230291	NA	NA	NA	NA	NA	1	NA
SPAC56F8.04c	470.309	491.389	449.229	0.914202	-0.129416	0.576874	0.757012	NA	NA	NA	NA	NA	NA	NA
SPAC56F8.05c	2251.4	3163.69	1339.1	0.423271	-1.24035	1.62799e-09	5.28385e-08	NA	1	1	NA	NA	NA	NA
SPAC56F8.06c	228.863	223.283	234.443	1.04998	0.070364	0.866951	0.954932	NA	NA	NA	NA	NA	NA	NA
SPAC56F8.07	118.069	130.593	105.545	0.808203	-0.307211	0.406874	0.606844	NA	NA	NA	NA	NA	NA	NA
SPAC56F8.08	926.546	926.943	926.149	0.999143	-0.00123719	0.933484	0.989265	NA	NA	NA	NA	NA	NA	NA
SPAC56F8.09	315.095	442.424	187.766	0.424403	-1.23649	2.77705e-06	4.13526e-05	NA	1	1	NA	NA	NA	NA
SPAC56F8.10	727.237	937.284	517.191	0.551797	-0.857789	0.00422035	0.0196773	NA	NA	1	NA	NA	NA	NA
SPAC56F8.11	371.519	392.176	350.863	0.894657	-0.160593	0.490306	0.683142	NA	NA	NA	NA	NA	NA	NA
SPAC56F8.12	5.18385	1.64086	8.72683	5.31846	2.41101	0.16422	0.323408	NA	NA	NA	NA	NA	NA	NA
SPAC56F8.13	205.077	127.319	282.834	2.22146	1.15151	0.00661282	0.0282694	1	NA	1	NA	NA	NA	NA
SPAC56F8.14c	1405.19	1286.97	1523.42	1.18373	0.243336	0.321724	0.521593	NA	NA	NA	NA	NA	NA	NA
SPAC56F8.15	588.21	421.256	755.165	1.79265	0.842095	0.056509	0.148865	NA	NA	NA	NA	NA	NA	NA
SPAC56F8.16	2156.67	1638.28	2675.06	1.63285	0.707391	0.0678965	0.169386	NA	NA	NA	NA	NA	NA	1
SPAC57A10.02	2037.58	1712.47	2362.7	1.3797	0.464354	0.0213105	0.0704311	NA	NA	NA	NA	NA	NA	NA
SPAC57A10.03	208.992	229.839	188.145	0.818595	-0.288778	0.315102	0.514097	NA	NA	NA	NA	NA	NA	NA
SPAC57A10.04	36.0594	36.6345	35.4844	0.968605	-0.0460197	0.978689	1	NA	NA	NA	NA	NA	NA	NA
SPAC57A10.05c	1124.55	986.865	1262.24	1.27904	0.355062	0.153593	0.308275	NA	NA	NA	NA	NA	NA	NA
SPAC57A10.06	5.72685	3.28172	8.17198	2.49016	1.31624	0.373817	0.576416	NA	NA	NA	NA	NA	NA	NA
SPAC57A10.07	454.465	453.252	455.677	1.00535	0.00769608	0.983847	1	NA	NA	NA	NA	NA	NA	NA
SPAC57A10.08c	131.612	80.011	183.213	2.28985	1.19525	0.00483935	0.0218326	1	NA	1	NA	NA	NA	NA
SPAC57A10.09c	1877.15	1401.28	2353.02	1.67919	0.747768	0.00022519	0.00175276	NA	NA	1	NA	NA	NA	NA
SPAC57A10.10c	2607.93	3753.78	1462.09	0.389498	-1.36031	3.16083e-11	1.39956e-09	NA	1	1	NA	NA	1	NA
SPAC57A10.11c	1527.83	1098.68	1956.99	1.78122	0.832868	0.00118743	0.00710219	NA	NA	1	NA	NA	NA	NA
SPAC57A10.12c	6304.87	10502.4	2107.32	0.200651	-2.31724	9.23667e-30	2.94078e-27	NA	1	1	NA	NA	NA	NA
SPAC57A10.14	246.927	218.491	275.363	1.26029	0.33376	0.226221	0.407677	NA	NA	NA	NA	NA	NA	NA
SPAC57A7.04c	15387.9	19341	11434.8	0.591221	-0.75823	0.000108108	0.000944033	NA	NA	1	NA	NA	1	NA
SPAC57A7.05	1779.29	555.423	3003.17	5.40699	2.43483	0.00581436	0.025425	1	NA	1	NA	NA	NA	NA
SPAC57A7.06	2316	3115.82	1516.19	0.48661	-1.03916	5.51492e-07	1.00471e-05	NA	1	1	NA	NA	1	NA
SPAC57A7.07c	352.525	313.456	391.593	1.24927	0.32109	0.21179	0.389031	NA	NA	NA	NA	NA	NA	NA
SPAC57A7.08	1908.91	1406.39	2411.44	1.71463	0.777898	0.000985107	0.00605927	NA	NA	1	NA	NA	NA	NA
SPAC57A7.09	594.839	339.092	850.586	2.50842	1.32678	0.0035724	0.017283	1	NA	1	NA	NA	NA	NA
SPAC57A7.10c	5695.91	5015.21	6376.62	1.27146	0.346483	0.0751417	0.182491	NA	NA	NA	NA	NA	NA	NA
SPAC57A7.11	2513.33	2249.46	2777.2	1.23461	0.304053	0.119658	0.256503	NA	NA	NA	NA	NA	NA	NA
SPAC57A7.12	5964.13	8810.23	3118.03	0.35391	-1.49854	6.93141e-14	4.93015e-12	NA	1	1	NA	NA	NA	NA
SPAC57A7.13	358.837	345.834	371.84	1.0752	0.104603	0.699675	0.848083	NA	NA	NA	NA	NA	1	NA
SPAC57A7.15c	176.215	151.485	200.945	1.3265	0.407628	0.203474	0.378212	NA	NA	NA	NA	NA	NA	NA
SPAC589.02c	607.808	489.935	725.682	1.48118	0.566746	0.0161209	0.0565797	NA	NA	NA	NA	NA	NA	NA
SPAC589.03c	203.013	238.197	167.828	0.704576	-0.505173	0.094311	0.216391	NA	NA	NA	NA	NA	NA	NA
SPAC589.04	484.751	480.545	488.957	1.0175	0.0250352	0.94159	0.993535	NA	NA	NA	NA	NA	NA	NA
SPAC589.05c	346.643	345.128	348.157	1.00878	0.0126072	0.918292	0.98141	NA	NA	NA	NA	NA	NA	NA
SPAC589.06c	2274.43	2516.46	2032.4	0.807641	-0.308214	0.114196	0.249026	NA	NA	NA	NA	NA	NA	NA
SPAC589.07c	265.742	146.181	385.303	2.63579	1.39824	3.02106e-07	5.88886e-06	1	NA	1	NA	NA	NA	NA
SPAC589.08c	77.3476	72.6191	82.0761	1.13023	0.176613	0.710904	0.856864	NA	NA	NA	NA	NA	NA	NA
SPAC589.09	827.309	781.501	873.117	1.11723	0.159928	0.528016	0.714928	NA	NA	NA	NA	NA	NA	NA
SPAC589.10c	614.926	842.503	387.348	0.459758	-1.12105	0.000517899	0.00358084	NA	1	1	NA	NA	NA	NA
SPAC589.11	33.3767	40.5822	26.1711	0.644892	-0.63287	0.277174	0.471789	NA	NA	NA	NA	NA	1	NA
SPAC589.12	2960.57	3074.26	2846.87	0.926035	-0.110861	0.618699	0.785236	NA	NA	NA	NA	NA	NA	NA
SPAC5D6.01	1100.42	1482.16	718.669	0.484879	-1.0443	1.16484e-06	1.923e-05	NA	1	1	NA	NA	NA	NA
SPAC5D6.02c	144.6	154.921	134.279	0.866761	-0.206293	0.544683	0.728788	NA	NA	NA	NA	NA	NA	NA
SPAC5D6.04	1486.09	1122.18	1849.99	1.64857	0.721219	0.0579185	0.151741	NA	NA	NA	NA	NA	NA	NA
SPAC5D6.05	405.115	369.813	440.417	1.19092	0.252073	0.321687	0.521593	NA	NA	NA	NA	NA	NA	NA
SPAC5D6.06c	158.1	122.055	194.144	1.59062	0.669592	0.0330485	0.0982491	NA	NA	NA	NA	NA	NA	NA
SPAC5D6.07c	241.868	149.332	334.404	2.23933	1.16307	3.98875e-05	0.000406536	1	NA	1	NA	NA	NA	NA
SPAC5D6.08c	176.05	105.314	246.786	2.34333	1.22856	0.00116056	0.00700314	1	NA	1	NA	NA	NA	NA
SPAC5D6.09c	2323.75	359.976	4287.53	11.9106	3.57417	0.00120189	0.00717487	1	NA	1	NA	NA	NA	NA
SPAC5D6.10c	12.8638	3.11924	22.6085	7.24808	2.8576	0.00766052	0.0317334	1	NA	1	NA	NA	NA	NA
SPAC5D6.12	1568.39	1570.21	1566.57	0.997686	-0.00334173	1	1	NA	NA	NA	NA	NA	NA	NA
SPAC5D6.13	1167.85	1069.44	1266.26	1.18404	0.243717	0.237014	0.421009	NA	NA	NA	NA	NA	NA	NA
SPAC5H10.01	260.304	58.9727	461.636	7.82796	2.96864	0.00469435	0.0213162	1	NA	1	NA	NA	NA	NA
SPAC5H10.02c	77.5335	16.5952	138.472	8.34411	3.06076	0.0518095	0.138583	NA	NA	NA	NA	NA	NA	NA
SPAC5H10.03	1730.06	3112.59	347.524	0.111651	-3.16293	1.6512e-46	1.22666e-43	NA	1	1	NA	NA	NA	NA
SPAC5H10.04	95.9104	62.9204	128.9	2.04863	1.03466	0.128004	0.269979	NA	NA	NA	1	NA	NA	NA
SPAC5H10.05c	265.475	309.711	221.239	0.71434	-0.485317	0.065103	0.16462	NA	NA	NA	NA	NA	NA	NA
SPAC5H10.06c	576.107	889.268	262.947	0.29569	-1.75784	1.73158e-13	1.19354e-11	NA	1	1	NA	NA	NA	NA
SPAC5H10.07	4.54355	8.04984	1.03727	0.128856	-2.95617	0.105671	0.235777	NA	NA	NA	NA	NA	NA	NA
SPAC5H10.08c	588.662	563.984	613.34	1.08751	0.121032	0.606372	0.776222	NA	NA	NA	NA	NA	NA	NA
SPAC5H10.09c	212.402	228.36	196.443	0.860232	-0.217202	0.44514	0.643068	NA	NA	NA	NA	NA	NA	NA
SPAC5H10.10	276.981	313.27	240.692	0.76832	-0.38022	0.179949	0.344937	NA	NA	NA	NA	NA	NA	NA
SPAC5H10.11	39.9979	18.7315	61.2642	3.27066	1.70958	0.135225	0.28113	NA	NA	NA	NA	NA	NA	NA
SPAC5H10.12c	339.195	459.491	218.9	0.476396	-1.06977	4.45513e-05	0.000444582	NA	1	1	NA	NA	NA	NA
SPAC5H10.13c	1295.39	1215.57	1375.22	1.13134	0.178033	0.40589	0.606161	NA	NA	NA	NA	NA	NA	NA
SPAC607.02c	454.345	620.016	288.674	0.465592	-1.10286	5.54855e-06	7.47935e-05	NA	1	1	NA	NA	NA	NA
SPAC607.03c	1358.58	1969.01	748.153	0.379964	-1.39607	7.50428e-11	3.11637e-09	NA	1	1	NA	NA	1	NA
SPAC607.04	225.665	317.242	134.088	0.422668	-1.2424	1.18707e-05	0.000141982	NA	1	1	NA	NA	NA	NA
SPAC607.05	1273.13	1165.5	1380.75	1.18468	0.2445	0.26615	0.458629	NA	NA	NA	NA	NA	NA	NA
SPAC607.06c	556.655	491.845	621.464	1.26354	0.337469	0.140181	0.288723	NA	NA	NA	NA	NA	NA	NA
SPAC607.07c	919.658	789.558	1049.76	1.32955	0.410938	0.058946	0.15365	NA	NA	NA	NA	NA	NA	NA
SPAC607.08c	645.202	482.958	807.445	1.67187	0.741465	0.0014014	0.00817607	NA	NA	1	NA	NA	NA	NA
SPAC607.09c	252.633	184.797	320.469	1.73416	0.794241	0.00506865	0.0226834	NA	NA	1	NA	NA	NA	NA
SPAC607.10	344.323	477.426	211.219	0.442413	-1.17653	5.63657e-06	7.5675e-05	NA	1	1	NA	NA	NA	NA
SPAC630.03	4012.11	3499.49	4524.74	1.29297	0.370689	0.0530641	0.141406	NA	NA	NA	NA	NA	NA	NA
SPAC630.04c	404.702	248.749	560.655	2.2539	1.17242	0.0408764	0.115952	NA	NA	NA	1	NA	NA	NA
SPAC630.05	899.657	493.68	1305.63	2.6447	1.4031	1.31748e-05	0.000155082	1	NA	1	NA	NA	NA	NA
SPAC630.06c	242.485	307.039	177.93	0.579502	-0.787115	0.00513623	0.0229398	NA	NA	1	NA	NA	NA	NA
SPAC630.07c	207.399	140.47	274.328	1.95293	0.96564	0.00884136	0.0354184	NA	NA	1	NA	NA	NA	NA
SPAC630.08c	4513.03	5586.73	3439.33	0.615625	-0.699877	0.000622121	0.0041512	NA	NA	1	NA	NA	NA	NA
SPAC630.09c	875.543	725.932	1025.15	1.41219	0.497935	0.0206064	0.0685891	NA	NA	NA	NA	NA	NA	NA
SPAC630.10	310.841	351.252	270.429	0.769899	-0.377259	0.1456	0.296071	NA	NA	NA	NA	NA	NA	NA
SPAC630.11	154.201	115.159	193.242	1.67805	0.746784	0.0192405	0.0649052	NA	NA	NA	NA	NA	NA	NA
SPAC630.12	658.788	727.645	589.931	0.810739	-0.30269	0.175908	0.340115	NA	NA	NA	NA	NA	NA	NA
SPAC630.13c	1365.53	1295.81	1435.24	1.1076	0.147432	0.454366	0.651809	NA	NA	NA	NA	NA	NA	NA
SPAC630.14c	2405.21	2336.01	2474.4	1.05924	0.0830314	0.647204	0.805511	NA	NA	NA	NA	NA	NA	NA
SPAC630.15	65.1417	60.6135	69.6698	1.14941	0.200894	0.626647	0.789479	NA	NA	NA	NA	NA	NA	NA
SPAC631.01c	1640.2	1615.43	1664.97	1.03067	0.0435824	0.840546	0.940383	NA	NA	NA	NA	NA	NA	NA
SPAC631.02	2487.68	2396.54	2578.83	1.07606	0.105763	0.574213	0.754558	NA	NA	NA	NA	NA	NA	NA
SPAC637.03	1321.01	144.255	2497.76	17.3148	4.11394	0.000438214	0.00309061	1	NA	1	NA	NA	NA	NA
SPAC637.04	733.329	739.147	727.511	0.984257	-0.0228927	0.90046	0.973172	NA	NA	NA	NA	NA	NA	NA
SPAC637.05c	2865.96	2775.02	2956.9	1.06554	0.0915875	0.635774	0.797221	NA	NA	NA	NA	NA	NA	NA
SPAC637.06	1338.51	1337.59	1339.43	1.00137	0.0019795	0.987702	1	NA	NA	NA	NA	NA	NA	NA
SPAC637.07	5199.12	6173.89	4224.35	0.684229	-0.54745	0.00753145	0.0313154	NA	NA	1	1	NA	1	NA
SPAC637.08	786.855	888.78	684.93	0.770641	-0.37587	0.0897789	0.208642	NA	NA	NA	NA	NA	NA	NA
SPAC637.09	826.218	997.498	654.937	0.65658	-0.606958	0.00697432	0.0294904	NA	NA	1	NA	NA	NA	NA
SPAC637.10c	497.988	465.761	530.214	1.13838	0.186984	0.451145	0.648679	NA	NA	NA	NA	NA	NA	NA
SPAC637.11	329.042	402.833	255.252	0.633642	-0.658261	0.0103349	0.0400806	NA	NA	1	NA	NA	NA	NA
SPAC637.12c	772.602	861.869	683.335	0.792853	-0.334876	0.125532	0.265688	NA	NA	NA	NA	NA	NA	NA
SPAC637.13c	1852.76	1362.76	2342.75	1.71912	0.781672	0.000144083	0.00119521	NA	NA	1	NA	NA	NA	NA
SPAC644.04	565.872	590.587	541.158	0.916305	-0.126101	0.595468	0.768161	NA	NA	NA	NA	NA	NA	NA
SPAC644.05c	457.824	452.805	462.843	1.02217	0.0316326	0.961768	1	NA	NA	NA	NA	NA	NA	NA
SPAC644.06c	1216.14	1018.32	1413.96	1.38851	0.473542	0.0386686	0.111152	NA	NA	NA	NA	NA	NA	NA
SPAC644.07	566.257	483.656	648.859	1.34157	0.423921	0.0693839	0.17207	NA	NA	NA	NA	NA	NA	NA
SPAC644.08	450.035	354.502	545.568	1.53897	0.621964	0.00927412	0.0365638	NA	NA	1	NA	NA	NA	NA
SPAC644.09	210.147	254.004	166.29	0.654673	-0.611153	0.031184	0.0941718	NA	NA	NA	NA	NA	NA	NA
SPAC644.10	160.366	190.743	129.989	0.681488	-0.553241	0.0726624	0.178014	NA	NA	NA	NA	NA	NA	NA
SPAC644.11c	818.38	693.171	943.589	1.36126	0.444947	0.0499479	0.134985	NA	NA	NA	NA	NA	NA	NA
SPAC644.12	1183.5	1369.14	997.858	0.728822	-0.456362	0.032876	0.0979027	NA	NA	NA	NA	NA	NA	NA
SPAC644.13c	654.204	591.115	717.292	1.21346	0.279123	0.228038	0.409856	NA	NA	NA	NA	NA	NA	NA
SPAC644.14c	387.479	406.269	368.688	0.907496	-0.140037	0.595409	0.768161	NA	NA	NA	NA	NA	NA	NA
SPAC644.15	1391.08	1933.06	849.095	0.439249	-1.18689	0.00250504	0.0130645	NA	1	1	NA	NA	NA	NA
SPAC644.16	1276.78	1389.06	1164.51	0.838338	-0.254396	0.229314	0.411154	NA	NA	NA	NA	NA	1	NA
SPAC644.17c	491.353	388.196	594.511	1.53147	0.614919	0.0095173	0.0372775	NA	NA	1	NA	NA	NA	NA
SPAC644.18c	825.267	717.451	933.084	1.30055	0.379127	0.0893871	0.208031	NA	NA	NA	NA	NA	NA	NA
SPAC652.01	238.907	237.255	240.56	1.01393	0.0199573	1	1	NA	NA	NA	NA	NA	NA	NA
SPAC664.01c	1554.71	1690.88	1418.54	0.838935	-0.253369	0.211108	0.388086	NA	NA	NA	NA	NA	1	NA
SPAC664.02c	637.256	661.664	612.848	0.926224	-0.110568	0.689283	0.839259	NA	NA	NA	NA	NA	NA	NA
SPAC664.03	1328.35	1224.53	1432.17	1.16957	0.225983	0.267641	0.460486	NA	NA	NA	NA	NA	NA	NA
SPAC664.04c	2140.56	2996.41	1284.72	0.428752	-1.22179	3.33401e-09	1.00865e-07	NA	1	1	NA	NA	NA	NA
SPAC664.05	22339.4	28947.6	15731.1	0.543433	-0.879827	8.77741e-06	0.000110034	NA	NA	1	NA	NA	NA	NA
SPAC664.06	2718.88	3897.93	1539.83	0.395039	-1.33993	4.77215e-11	2.07186e-09	NA	1	1	NA	NA	NA	NA
SPAC664.07c	166.838	156.229	177.447	1.13582	0.183732	0.55518	0.737519	NA	NA	NA	NA	NA	NA	NA
SPAC664.08c	954.985	1355.69	554.283	0.408857	-1.29033	4.29397e-09	1.25919e-07	NA	1	1	NA	NA	NA	NA
SPAC664.09	588.46	814.228	362.692	0.445443	-1.16669	4.9759e-07	9.1676e-06	NA	1	1	NA	NA	NA	NA
SPAC664.10	770.625	837.338	703.913	0.840656	-0.250413	0.268374	0.461628	NA	NA	NA	NA	NA	NA	NA
SPAC664.11	29954.6	31523	28386.2	0.900489	-0.151219	0.444907	0.643029	NA	NA	NA	NA	NA	NA	NA
SPAC664.12c	209.041	206.981	211.1	1.0199	0.0284295	0.90197	0.973172	NA	NA	NA	NA	NA	NA	NA
SPAC664.13	56.5297	40.7286	72.3307	1.77592	0.828566	0.0634811	0.161936	NA	NA	NA	NA	NA	NA	NA
SPAC664.14	1251.17	1598.51	903.833	0.565423	-0.822597	0.00015054	0.00124568	NA	NA	1	NA	NA	NA	NA
SPAC664.15	1033.92	738.335	1329.5	1.80068	0.848542	0.000586345	0.00397596	NA	NA	1	NA	NA	NA	NA
SPAC683.02c	347.645	620.179	75.1119	0.121113	-3.04557	1.02594e-28	2.74377e-26	NA	1	1	NA	NA	NA	NA
SPAC683.03	0.487096	0	0.974192	Inf	Inf	0.916353	0.980574	NA	NA	NA	NA	NA	NA	NA
SPAC688.02c	184.927	201.084	168.771	0.839307	-0.252729	0.411296	0.610104	NA	NA	NA	NA	NA	NA	NA
SPAC688.03c	246.543	95.9321	397.153	4.13994	2.04961	0.000108967	0.000948639	1	NA	1	NA	NA	NA	NA
SPAC688.04c	1561.83	707.995	2415.67	3.41198	1.77061	7.67126e-05	0.000704534	1	NA	1	NA	NA	NA	NA
SPAC688.06c	99.195	80.36	118.03	1.46877	0.554604	0.177566	0.34174	NA	NA	NA	NA	NA	NA	NA
SPAC688.07c	2424.04	1939.35	2908.73	1.49985	0.584814	0.00432479	0.0200246	NA	NA	1	NA	NA	NA	NA
SPAC688.08	712.559	685.065	740.053	1.08027	0.111387	0.621326	0.786778	NA	NA	NA	NA	NA	NA	NA
SPAC688.09	523.594	500.699	546.489	1.09145	0.126249	0.565294	0.746727	NA	NA	NA	NA	NA	NA	NA
SPAC688.10	640.469	582.862	698.076	1.19767	0.26023	0.241881	0.427075	NA	NA	NA	NA	NA	NA	NA
SPAC688.11	4792.43	4086.44	5498.42	1.34553	0.42817	0.0295947	0.0908267	NA	NA	NA	NA	1	NA	NA
SPAC688.12c	991.758	1004.2	979.317	0.975223	-0.0361965	0.810618	0.923304	NA	NA	NA	NA	NA	NA	NA
SPAC688.13	178.094	117.303	238.885	2.03647	1.02607	0.0222664	0.0726729	NA	NA	NA	NA	NA	NA	NA
SPAC688.14	427.509	511.94	343.078	0.670153	-0.577437	0.0163127	0.0571328	NA	NA	NA	NA	NA	NA	NA
SPAC688.16	182.706	199.419	165.993	0.832385	-0.264676	0.43232	0.630562	NA	NA	NA	NA	NA	NA	NA
SPAC694.02	14316.7	16677.7	11955.7	0.716866	-0.480225	0.0145576	0.0519937	NA	NA	NA	NA	NA	NA	NA
SPAC694.03	159.034	157.081	160.987	1.02486	0.0354303	0.990417	1	NA	NA	NA	NA	NA	NA	NA
SPAC694.04c	991.966	1273.78	710.155	0.557519	-0.842906	0.0267014	0.0835793	NA	NA	NA	NA	NA	NA	NA
SPAC694.05c	4897.89	6322.85	3472.93	0.549267	-0.864422	0.000170515	0.00137855	NA	NA	1	NA	NA	NA	NA
SPAC694.06c	1124.11	1016.98	1231.25	1.2107	0.275841	0.205338	0.380407	NA	NA	NA	NA	NA	NA	NA
SPAC6B12.02c	1123.11	1060.63	1185.59	1.11782	0.160686	0.442109	0.64023	NA	NA	NA	NA	NA	NA	NA
SPAC6B12.03c	30.9352	4.59761	57.2729	12.4571	3.63889	0.0144525	0.0517304	NA	NA	NA	NA	NA	NA	NA
SPAC6B12.04c	339.043	352.941	325.145	0.921243	-0.118346	0.584216	0.763267	NA	NA	NA	NA	NA	NA	NA
SPAC6B12.05c	549.508	449.67	649.347	1.44405	0.530123	0.0255522	0.0807764	NA	NA	NA	NA	1	NA	NA
SPAC6B12.06c	85.4517	79.694	91.2095	1.1445	0.194711	0.687961	0.838471	NA	NA	NA	NA	NA	NA	NA
SPAC6B12.07c	1191.01	1188.47	1193.55	1.00427	0.00615236	0.975741	1	NA	NA	NA	NA	NA	NA	NA
SPAC6B12.08	564.701	389.056	740.345	1.90292	0.928219	9.1607e-05	0.000813392	NA	NA	1	NA	NA	NA	NA
SPAC6B12.09	387.723	473.105	302.341	0.639057	-0.645983	0.0116879	0.0440752	NA	NA	1	NA	NA	NA	NA
SPAC6B12.10c	664.393	599.506	729.279	1.21647	0.282699	0.227602	0.409623	NA	NA	NA	NA	NA	NA	NA
SPAC6B12.11	490.308	497.116	483.5	0.972609	-0.0400687	0.876639	0.961894	NA	NA	NA	NA	NA	NA	NA
SPAC6B12.12	5182.37	4502.31	5862.42	1.30209	0.38083	0.0506941	0.136395	NA	NA	NA	1	NA	NA	NA
SPAC6B12.13	350.611	344.867	356.354	1.03331	0.0472689	0.898162	0.973172	NA	NA	NA	NA	NA	NA	NA
SPAC6B12.14c	404.628	543.881	265.376	0.48793	-1.03525	0.000691991	0.00453149	NA	1	1	NA	NA	NA	NA
SPAC6B12.15	23623.4	31688.5	15558.2	0.490972	-1.02629	0.000160021	0.00130795	NA	1	1	NA	NA	NA	NA
SPAC6B12.16	4.26481	5.09308	3.43653	0.674744	-0.567587	0.794703	0.913423	NA	NA	NA	NA	NA	NA	NA
SPAC6B12.18	281.926	394.296	169.556	0.430022	-1.21752	6.88354e-06	8.94327e-05	NA	1	1	NA	NA	NA	NA
SPAC6B12.19	19.3555	19.3814	19.3296	0.997328	-0.00385967	1	1	NA	NA	NA	NA	NA	NA	NA
SPAC6C3.02c	3010.89	3196.14	2825.64	0.884081	-0.177749	0.381237	0.582351	NA	NA	NA	NA	NA	NA	NA
SPAC6C3.03c	13.7953	9.85318	17.7375	1.80018	0.848141	0.356548	0.557805	NA	NA	NA	NA	NA	NA	NA
SPAC6C3.04	6109.42	1541.4	10677.4	6.92713	2.79226	1.10349e-11	5.34634e-10	1	NA	1	NA	NA	NA	NA
SPAC6C3.05	37.0296	34.4982	39.561	1.14676	0.197559	0.751275	0.881233	NA	NA	NA	1	NA	NA	NA
SPAC6C3.06c	976.094	941.117	1011.07	1.07433	0.103439	0.59586	0.768317	NA	NA	NA	NA	NA	NA	NA
SPAC6C3.07	20.2488	20.1938	20.3038	1.00545	0.0078382	0.932102	0.988584	NA	NA	NA	NA	NA	NA	NA
SPAC6C3.08	490.712	320.06	661.364	2.06638	1.0471	0.00283203	0.0143773	1	NA	1	NA	NA	NA	NA
SPAC6C3.09	992.66	1164.71	820.612	0.704564	-0.505196	0.017392	0.0600633	NA	NA	NA	NA	NA	NA	NA
SPAC6F12.02	1619.86	1123.41	2116.32	1.88383	0.913671	1.12826e-05	0.00013592	NA	NA	1	NA	NA	NA	1
SPAC6F12.03c	407.781	248.538	567.024	2.28144	1.18994	0.000203484	0.00161334	1	NA	1	NA	1	NA	NA
SPAC6F12.04	1003.12	829.368	1176.86	1.41899	0.504861	0.0225989	0.0734905	NA	NA	NA	NA	NA	NA	NA
SPAC6F12.05c	536.358	543.474	529.243	0.973816	-0.0382789	0.845741	0.943824	NA	NA	NA	NA	NA	NA	NA
SPAC6F12.06	1137.25	1024.99	1249.51	1.21906	0.285764	0.182011	0.347793	NA	NA	NA	NA	NA	NA	NA
SPAC6F12.07	1008.86	1099.78	917.952	0.834673	-0.260718	0.255774	0.445805	NA	NA	NA	NA	NA	NA	NA
SPAC6F12.08c	296.446	276.83	316.062	1.14172	0.191206	0.483563	0.677486	NA	NA	NA	NA	NA	NA	NA
SPAC6F12.09	442.647	490.22	395.074	0.805911	-0.311307	0.203796	0.378705	NA	NA	NA	NA	NA	NA	NA
SPAC6F12.10c	7075.87	9339.45	4812.29	0.515265	-0.956614	1.57929e-06	2.51633e-05	NA	NA	1	NA	NA	NA	NA
SPAC6F12.11c	593.278	615.76	570.796	0.926979	-0.109392	0.628607	0.7915	NA	NA	NA	NA	NA	NA	NA
SPAC6F12.12	1664.14	1422.7	1905.58	1.33941	0.4216	0.0488953	0.132622	NA	NA	NA	NA	NA	NA	NA
SPAC6F12.13c	2839.21	3263.14	2415.27	0.740167	-0.434078	0.0338036	0.100182	NA	NA	NA	NA	NA	NA	NA
SPAC6F12.14	299.867	288.779	310.955	1.07679	0.106737	0.644613	0.803333	NA	NA	NA	NA	NA	NA	NA
SPAC6F12.15c	445.752	380.617	510.887	1.34226	0.424663	0.0709187	0.175032	NA	NA	NA	NA	NA	NA	NA
SPAC6F12.16c	1422.94	1873.09	972.781	0.519346	-0.945232	0.00018743	0.0014972	NA	NA	1	NA	NA	1	NA
SPAC6F12.17	2366.15	2259.02	2473.28	1.09485	0.130731	0.510086	0.699639	NA	NA	NA	NA	NA	NA	NA
SPAC6F6.01	1428.05	1388.89	1467.2	1.05638	0.07913	0.713614	0.858572	NA	NA	NA	NA	1	NA	NA
SPAC6F6.02c	144.714	146.692	142.735	0.973024	-0.0394532	0.962771	1	NA	NA	NA	NA	NA	NA	NA
SPAC6F6.03c	1725.86	2297.85	1153.88	0.502157	-0.993788	2.37788e-06	3.62152e-05	NA	NA	1	NA	NA	NA	NA
SPAC6F6.04c	172.936	202.871	143	0.704884	-0.504543	0.112778	0.24674	NA	NA	NA	NA	NA	NA	NA
SPAC6F6.05	766.074	815.943	716.205	0.877764	-0.188095	0.438806	0.63655	NA	NA	NA	NA	NA	NA	NA
SPAC6F6.06c	890.97	819.256	962.683	1.17507	0.232746	0.279659	0.474689	NA	NA	NA	NA	NA	NA	NA
SPAC6F6.07c	10429.6	14370.4	6488.73	0.451533	-1.1471	2.14749e-05	0.000234228	NA	1	1	NA	NA	NA	NA
SPAC6F6.08c	550.892	544.896	556.889	1.02201	0.0314088	0.844832	0.943463	NA	NA	NA	NA	NA	NA	NA
SPAC6F6.09	215.115	226.054	204.177	0.903224	-0.146845	0.608088	0.777525	NA	NA	NA	NA	NA	NA	NA
SPAC6F6.10c	1723.05	1556.93	1889.16	1.21339	0.279039	0.17655	0.340456	NA	NA	NA	NA	NA	NA	NA
SPAC6F6.11c	252.095	357.491	146.699	0.410356	-1.28505	3.73974e-06	5.36565e-05	NA	1	1	NA	NA	NA	NA
SPAC6F6.12	757.982	617.23	898.734	1.45608	0.542085	0.0154779	0.0547832	NA	NA	NA	NA	NA	NA	NA
SPAC6F6.13c	1135.08	1053.82	1216.33	1.15421	0.2069	0.302829	0.500796	NA	NA	NA	NA	NA	NA	NA
SPAC6F6.15	1219.43	1007.02	1431.83	1.42185	0.507772	0.0145059	0.0518367	NA	NA	NA	NA	NA	NA	NA
SPAC6F6.16c	523.059	476.939	569.179	1.1934	0.25508	0.299645	0.497176	NA	NA	NA	NA	NA	NA	NA
SPAC6F6.17	1934.51	2368.65	1500.36	0.633425	-0.658754	0.00131832	0.00773863	NA	NA	1	NA	NA	NA	NA
SPAC6F6.19	72.5659	78.687	66.4447	0.844417	-0.243973	0.589002	0.765713	NA	NA	NA	NA	NA	NA	NA
SPAC6G10.02c	1543.76	1593.54	1493.98	0.937528	-0.0930659	0.662964	0.817065	NA	NA	NA	NA	NA	NA	NA
SPAC6G10.03c	717.016	675.862	758.17	1.12178	0.165794	0.454915	0.652136	NA	NA	NA	NA	NA	NA	NA
SPAC6G10.04c	2560.19	2689.57	2430.82	0.903794	-0.145935	0.454394	0.651809	NA	NA	NA	NA	NA	NA	NA
SPAC6G10.05c	1684.14	1485.1	1883.17	1.26804	0.342599	0.0932596	0.214273	NA	NA	NA	NA	NA	NA	NA
SPAC6G10.06	2.97413	0.657949	5.2903	8.04059	3.0073	0.314183	0.513636	NA	NA	NA	NA	NA	NA	NA
SPAC6G10.07	2019.96	2222.17	1817.76	0.818009	-0.289811	0.148556	0.300437	NA	NA	NA	NA	NA	1	NA
SPAC6G10.08	1980.27	1942.22	2018.31	1.03918	0.0554425	0.742871	0.87565	NA	NA	NA	NA	NA	NA	NA
SPAC6G10.09	5261.42	4598.21	5924.63	1.28846	0.365651	0.0627713	0.160554	NA	NA	NA	NA	NA	NA	NA
SPAC6G10.10c	225.47	239.172	211.768	0.885422	-0.175563	0.590474	0.766585	NA	NA	NA	NA	NA	NA	NA
SPAC6G10.11c	1998.49	2755.85	1241.12	0.450359	-1.15085	1.60328e-08	4.06043e-07	NA	1	1	NA	NA	NA	NA
SPAC6G10.12c	1148.11	1295.8	1000.43	0.772056	-0.373223	0.0738783	0.180274	NA	NA	NA	NA	NA	NA	1
SPAC6G9.01c	110.526	149.633	71.4196	0.477298	-1.06704	0.00658906	0.0281858	NA	1	1	NA	NA	NA	NA
SPAC6G9.02c	1138.78	1523.36	754.204	0.495092	-1.01423	2.44943e-06	3.69682e-05	NA	1	1	NA	NA	1	NA
SPAC6G9.03c	225.204	243.291	207.118	0.85132	-0.232226	0.438574	0.636369	NA	NA	NA	NA	NA	NA	NA
SPAC6G9.04	615.485	744.898	486.072	0.652535	-0.615874	0.00706496	0.0298397	NA	NA	1	NA	NA	NA	NA
SPAC6G9.05	225.404	243.453	207.354	0.851722	-0.231546	0.457707	0.655014	NA	NA	NA	NA	NA	NA	NA
SPAC6G9.06c	1023.69	897.001	1150.38	1.28248	0.358935	0.0941505	0.216097	NA	NA	NA	NA	NA	NA	NA
SPAC6G9.07c	698.267	652.386	744.148	1.14066	0.189864	0.408832	0.608379	NA	NA	NA	NA	NA	NA	NA
SPAC6G9.08	1384.06	1274.77	1493.34	1.17146	0.228313	0.256015	0.445894	NA	NA	NA	NA	NA	NA	NA
SPAC6G9.09c	1919.42	2757.96	1080.87	0.391909	-1.35141	1.44246e-10	5.5427e-09	NA	1	1	NA	NA	1	NA
SPAC6G9.10c	1967.8	2838.15	1097.45	0.386678	-1.3708	2.18249e-09	6.88306e-08	NA	1	1	NA	NA	NA	NA
SPAC6G9.11	1854.04	1919.31	1788.78	0.931992	-0.101611	0.632276	0.794474	NA	NA	NA	NA	NA	NA	NA
SPAC6G9.12	1709.79	1633.37	1786.22	1.09358	0.129056	0.548428	0.732202	NA	NA	NA	NA	NA	NA	NA
SPAC6G9.13c	22.7774	28.9176	16.6372	0.575329	-0.797541	0.254346	0.444125	NA	NA	NA	NA	NA	NA	NA
SPAC6G9.14	1521.93	1326.82	1717.03	1.2941	0.371948	0.0798921	0.191181	NA	NA	NA	NA	NA	1	NA
SPAC6G9.15c	238.649	267.131	210.167	0.786755	-0.346013	0.213745	0.391426	NA	NA	NA	NA	NA	NA	NA
SPAC6G9.16c	245.589	156.724	334.455	2.13403	1.09358	0.000435114	0.00307199	1	NA	1	NA	NA	NA	NA
SPAC732.01	495.642	517.603	473.682	0.915145	-0.127928	0.65062	0.808408	NA	NA	NA	NA	NA	NA	NA
SPAC732.02c	993.495	660.867	1326.12	2.00664	1.00478	4.97165e-05	0.000486683	1	NA	1	NA	NA	NA	NA
SPAC750.01	4.64773	6.57146	2.72399	0.414519	-1.27049	0.472869	0.667793	NA	NA	NA	NA	NA	NA	NA
SPAC750.02c	0	0	0	NA	NA	NA	NA	NA	NA	NA	NA	NA	NA	NA
SPAC750.03c	0.328975	0.657949	0	0	#NAME?	0.902092	0.973172	NA	NA	NA	NA	NA	NA	NA
SPAC750.04c	0	0	0	NA	NA	NA	NA	NA	NA	NA	NA	NA	NA	NA
SPAC750.05c	0	0	0	NA	NA	NA	NA	NA	NA	NA	NA	NA	NA	NA
SPAC750.06c	0	0	0	NA	NA	NA	NA	NA	NA	NA	NA	NA	NA	NA
SPAC750.07c	0	0	0	NA	NA	NA	NA	NA	NA	NA	NA	NA	NA	NA
SPAC750.08c	0	0	0	NA	NA	NA	NA	NA	NA	NA	NA	NA	NA	NA
SPAC767.01c	2159.74	1626.32	2693.16	1.65598	0.727689	0.000399058	0.00285358	NA	NA	1	NA	NA	NA	NA
SPAC7D4.02c	414.3	389.171	439.43	1.12914	0.17523	0.459103	0.656311	NA	NA	NA	NA	NA	NA	NA
SPAC7D4.03c	1611.05	1224.59	1997.51	1.63116	0.705902	0.000683002	0.00449022	NA	NA	1	NA	NA	NA	NA
SPAC7D4.04	1441.25	1101.38	1781.13	1.61718	0.693476	0.000945802	0.00584439	NA	NA	1	NA	NA	NA	NA
[truncated: 5,024 more rows]

## Sheet: ncRNAs1
S2_1 Table. List of ncRNAs induced or repressed >2-fold on glycerol withneighbouring genes also showing significant expression changes (p < 0.05)
ncRNA				neighbouring transcript that changes expression				other neighbouring transcript that changes expression				type of arrangeent (see Fig S3)
ncRNA	BaseMean_Glu	BaseMean_Gly	fold change	neighbouring transcript 1	BaseMean_Glu	BaseMean_Gly	fold change	neighbouring transcript 2	BaseMean_Glu	BaseMean_Gly	fold change
SPNCRNA.1256	9.85318	1033.73	104.914	SPCC1739.08c	97.7676	9651.54	98.7193					1B
SPNCRNA.603	2.95676	81.5271	27.5732	SPAC1F8.01	37.6335	10487.7	278.68					1B
SPNCRNA.1697	33.8483	3.04872	0.0900704	SPBPB2B2.13	613.688	8064.86	13.1416					2B
SPNCRNA.1317	52.5797	1422.15	27.0475	SPBC1683.07	283.58	45.7624	0.161374					1B/2B
SPNCRNA.1318	97.6212	2002.73	20.5153	SPBC1683.08	288.015	8092.34	28.0969					1B/2B
SPNCRNA.1319	97.581	1.03727	0.0106298	SPBC1683.08	107.799	973.346	9.02924					2B
SPNCRNA.298	40.9152	1450.44	35.4498	SPBC1683.08	288.015	8092.34	28.0969					2A
SPNCRNA.1316	113.843	56.753	0.498519	SPBC1683.05	1064.81	450.308	0.422899					1B
SPNCRNA.1120	11.9975	81.0763	6.75774	SPCC548.07c	125.702	7984.78	63.5213					3B
SPNCRNA.1252	46.6582	179.704	3.85151	SPCC4F11.02	737.336	1413.41	1.91692					1B
SPNCRNA.1072	0	23.0372	Inf	SPAP8A3.07c	4995.89	1648.91	0.330053					2B
SPNCRNA.130	7.0589	1065.58	150.956	SPAC27D7.03c	238.595	9173.33	38.4473					1B
SPNCRNA.577	3.11924	228.387	73.2188	SPBC1652.01	392.167	1410.4	3.59643					3B
SPNCRNA.276	1.3159	89.2483	67.823	SPAC1039.11c	317.729	1740.71	5.47861					1A
SPNCRNA.07	2.13633	119.972	56.1578	SPCC1884.02	916.787	534.714	0.583248					1B
SPNCRNA.1314	10.0237	365.785	36.492	SPBC359.06	60.1341	22766.5	378.596					1A
SPNCRNA.1322	0.820429	25.6035	31.2074	SPBC1198.05	2785.12	1764.77	0.63364	SPBC1198.06c	881.649	1262.69	1.43219	2B/3A
SPNCRNA.1470	2.13633	35.0113	16.3885	SPBC3H7.07c	1273.6	575.955	0.452225					2B
SPNCRNA.1611	3.11924	50.8729	16.3094	SPBC1105.14	865.182	3941.06	4.55518					1B
SPNCRNA.1086	11.6645	134.658	11.5442	SPAC1039.08	109.262	309.816	2.83554	SPAC1039.09	52.0843	1121.25	21.5276	2B/1B
SPNCRNA.486	1.64086	17.1196	10.4333	SPCC4B3.07	3984.33	2305.14	0.578553					2A
SPNCRNA.801	38.2834	381.203	9.9574	SPAC13F5.03c	518.219	52562.1	101.428					1B
SPNCRNA.1162	26.1234	242.012	9.26418	SPCPB16A4.06c	78.0371	2264.3	29.0157					1A
SPNCRNA.571	39.5913	306.69	7.74641	SPBC16E9.20	6.57146	39.1825	5.96253					3A
SPNCRNA.1137	7.06693	53.1144	7.51591	SPCC1682.11c	502.258	960.871	1.9131	SPCC1682.12c	620.959	379.676	0.611435	1B/2B
SPNCRNA.1121	16.9201	118.818	7.02232	SPCC548.07c	125.702	7984.78	63.5213					1B
SPNCRNA.935	69.3293	477.451	6.88672	SPAP7G5.06	554.253	1467.62	2.64793					1A
SPNCRNA.1481/571	50.7603	328.586	6.47329	SPBC16E9.20	6.57146	39.1825	5.96253					3A
SPNCRNA.769	20.0393	126.523	6.31374	SPAPB1A10.13	1601.42	3501.86	2.18672					2B
SPNCRNA.770	10.3567	61.8004	5.9672	SPAC140.02	9457.53	2979.13	0.315001					2B
SPNCRNA.1523	62.6115	366.073	5.84674	SPBC365.11	503.818	221.12	0.438889					2B
SPNCRNA.1354	16.0997	93.5865	5.81294	SPBC106.14c	2218.08	827.247	0.372957					2B
SPNCRNA.1621	5.58855	29.8063	5.33345	SPBC16D10.05	829.669	1506.88	1.81624					2B
SPNCRNA.1071	1023.83	5110.28	4.99133	SPAP8A3.04c	4442.06	22459.3	5.05605					1A
SPNCRNA.1015	15.1168	70.4641	4.66132	SPAC144.12	1054.55	2196.8	2.08317					1B
SPNCRNA.827	9.69873	42.3668	4.36828	SPAC32A11.01	262.907	764.417	2.90756					1B
SPNCRNA.132	90.839	388.166	4.27312	SPCC1753.02c	1934.2	5033.68	2.60246					1B
SPNCRNA.1557	14.1339	59.1932	4.18804	SPBP19A11.07c	339.084	616.681	1.81867					3A
SPNCRNA.32	590.878	2363.71	4.00033	SPCC417.16	1840.04	7752.99	4.21349	SPCC417.15	536	2189.53	4.08496	3A
SPNCRNA.1558	28.0892	109.019	3.88119	SPBP4H10.09	12.6394	649.866	51.4158					1B
SPNCRNA.1252	46.6582	179.704	3.85151	SPCC4F11.02	737.336	1413.41	1.91692					1B
SPNCRNA.989	44.8549	167.664	3.73791	SPAC9E9.09c	23622.3	38508.7	1.63018					1B
SPNCRNA.834	27.9267	101.087	3.61972	SPAC4A8.04	1282.81	10168.2	7.92653					1A
SPNCRNA.1218	60.4591	211.188	3.49307	SPCC417.16	1840.04	7752.99	4.21349					1B
SPNCRNA.995	57.1613	199.251	3.48577	SPAC27D7.11c	1364.74	15194.5	11.1336					1A
SPNCRNA.1451	56.0239	183.096	3.26818	SPBC19C2.03	549.509	222.592	0.405074					1B
SPNCRNA.1024	47.3242	150.056	3.1708	SPAC22F8.05	1024.55	4483.67	4.37625					1A
SPNCRNA.866	302.953	944.097	3.11631	SPAPB24D3.10c	400.38	71218.8	177.878					1A
SPNCRNA.1195	62.108	193.107	3.10921	SPCC622.12c	5451.56	11207.7	2.05587					1B
SPNCRNA.969	83.1463	257.877	3.10148	SPAC683.02c	620.179	75.1119	0.121113					2B
SPNCRNA.650	21.8507	66.0125	3.02107	SPAC23E2.03c	188.314	2968.25	15.7622					1B
SPNCRNA.1074	83.7882	250.146	2.98546	SPAP8A3.12c	2973.56	5641.86	1.89734					1B
SPNCRNA.887	25.4574	75.9974	2.98528	SPAC688.04c	707.995	2415.67	3.41198					1B
SPNCRNA.683	29.2426	84.7873	2.89944	SPAC4G8.10	154.758	321.339	2.07639					1B
SPNCRNA.1633	26.1234	75.0325	2.87224	SPBC13G1.04c	443.439	198.007	0.446526					2B
SPNCRNA.1203	299.136	832.952	2.78453	SPCC1753.02c	1934.2	5033.68	2.60246					1B
SPNCRNA.142	58.9727	164.111	2.78284	SPNCRNA.623	262.184	118.629	0.452465					2B
SPNCRNA.867	111.56	294.011	2.63544	SPAPB24D3.10c	400.38	71218.8	177.878					1B
SPNCRNA.1443	292.759	740.55	2.52956	SPBC29B5.02c	471.163	2894.34	6.14297					1B
SPNCRNA.570	368.042	930.323	2.52776	SPBC30B4.09	424.399	1064.9	2.50921					2A
SPNCRNA.253	56.8524	141.679	2.49205	SPAC22F8.04	1004	1674.53	1.66786					1B
SPNCRNA.966	26.9438	66.4225	2.46522	SPAC25B8.08	443.253	840.594	1.89642					3A
SPNCRNA.1202	40.4277	93.9241	2.32326	SPCC584.16c	40.5742	92.707	2.28488					1B
SPNCRNA.1385	125.532	285.625	2.27532	SPBC530.11c	2173.59	1068.82	0.491732					3A
SPNCRNA.1278	90.8551	206.636	2.27434	SPCC1840.03	5076.11	3495.67	0.688651					1A
SPNCRNA.920	45.3423	101.74	2.24382	SPAC17A2.14	1273.86	838.331	0.658105	SPAC17A2.13c	3885.12	7085.53	1.82376	1A/1B
SPNCRNA.815	231	517.573	2.24057	SPAC6C3.08	320.06	661.364	2.06638					1B
SPNCRNA.600	276.83	554.874	2.00439	SPAC17G6.02c	248.911	533.898	2.14494					1B/2A
SPNCRNA.963	66.3886	13.6106	0.205014	SPAC26H5.10c	32391.2	10850.8	0.334992					3B
SPNCRNA.907	46.1547	10.1519	0.219954	SPAP32A8.02	402.841	829.738	2.05972					1B
SPNCRNA.322	189.451	35.9352	0.189681	SPBC947.04	1939.91	438.086	0.225829					1B
SPNCRNA.1424	176.324	41.4463	0.235057	SPBC3D6.02	30208.5	11745.6	0.388818					1B
SPNCRNA.611	86.2575	35.204	0.408127	SPAC11D3.18c	47.1617	653.906	13.8652					2B
SPNCRNA.655	61.125	19.6765	0.321906	SPAC227.02c	364.752	157.166	0.430884					2B
SPNCRNA.746	53.4002	20.1052	0.376501	SPAC23H4.04	485.753	208.578	0.429392					3B
SPNCRNA.763	40.2572	11.3878	0.282875	SPAC1002.09c	2570.17	4635.68	1.80365					1B
SPNCRNA.186	102.674	45.5323	0.443464	SPAC607.10	477.426	211.219	0.442413					2A/1A
SPNCRNA.809	56.1944	21.2371	0.377922	SPAC4G9.19	123.558	364.257	2.94807					1A
SPNCRNA.813	86.2735	20.2629	0.234868	SPAC6C3.04	1541.4	10677.4	6.92713					1A
SPNCRNA.838	65.2111	24.4213	0.374496	SPAC4A8.07c	627.733	415.573	0.662021					1B
SPNCRNA.88	139.471	21.2465	0.152336	SPAC1786.02	6714.14	1848.5	0.275314					2A
SPNCRNA.560	28.1053	2.46234	0.0876113	SPAC589.07c	146.181	385.303	2.63579					2B
SPNCRNA.921	136.693	36.8055	0.269257	SPAC17G6.11c	1932.42	1270.29	0.657358					1B/2B
SPNCRNA.963	66.3886	13.6106	0.205014	SPAC26H5.10c	32391.2	10850.8	0.334992					1A
SPNCRNA.977	81.6599	32.2183	0.394543	SPAC27F1.05c	123.42	373.7	3.02788					2B
SPNCRNA.1026	79.3691	17.9267	0.225865	SPAC20G4.02c	222.788	751.643	3.37381					2B
SPNCRNA.1027	99.0674	46.6957	0.471353	SPAC20G4.05c	263.874	980.559	3.71602					2B
SPNCRNA.564	370.253	130.733	0.353091	SPAC1B3.04c	207.338	332.758	1.60491					2B
SPNCRNA.1060	30.0711	4.08599	0.135878	SPAC19D5.05c	293.531	146.257	0.498267					1B
SPNCRNA.623	262.184	118.629	0.452465	SPAC24B11.08c	733.202	1091.81	1.4891					1A
SPNCRNA.716	617.758	162.412	0.262905	SPAC56F8.13	127.319	282.834	2.22146					1B
SPNCRNA.720	34.1732	5.67811	0.166157	SPAC4C5.01	439.598	191.919	0.436578					1B
SPNCRNA.806	45.8378	10.9591	0.239083	SPAC18G6.14c	18427.9	8397.06	0.455671					3A
SPNCRNA.876	99.2379	44.5675	0.449097	SPAC1786.02	6714.14	1848.5	0.275314					1B
SPNCRNA.907	46.1547	10.1519	0.219954	SPAP32A8.02	402.841	829.738	2.05972					1B
SPNCRNA.911	106.979	45.9832	0.429834	SPAC328.03	3520.71	6518.06	1.85135					1B
SPNCRNA.529/911	78.5487	26.3288	0.335191	SPAC328.03	3520.71	6518.06	1.85135					1B
SPNCRNA.964	807.195	303.027	0.375407	SPAC26H5.10c	32391.2	10850.8	0.334992					1A
SPNCRNA.1008	54.2045	16.6278	0.30676	SPAC1635.01	4180.08	8918.72	2.13363					1B/2B
SPNCRNA.1034	30.2255	6.06591	0.200688	SPAC19B12.04	2221.42	1158.95	0.521715					1B
SPNCRNA.1063	203.723	97.7041	0.479592	SPAPJ760.03c	3353.21	1240.73	0.370014					1A
SPNCRNA.1307	107.767	25.3453	0.235185	SPBPB10D8.01	672.135	73.5513	0.109429					3A
SPNCRNA.1324	180.581	51.1099	0.28303	SPBC1198.13c	797.544	1654.7	2.07475					1B
SPNCRNA.1340	27.1063	6.09745	0.224946	SPBP26C9.03c	297.86	68.5857	0.230261					1B
SPNCRNA.321/1379	32.5324	7.2924	0.224158	SPBC947.04	1939.91	438.086	0.225829					2B
SPNCRNA.322	189.451	35.9352	0.189681	SPBC947.04	1939.91	438.086	0.225829					1B
SPNCRNA.1402	76.0633	29.1883	0.383737	SPBP35G2.14	3588.08	5268.7	1.46839					1A
SPNCRNA.1461	79.5316	13.3583	0.167962	SPBC11G11.01	588.483	970.534	1.64921					1A
SPNCRNA.1474	61.45	22.3059	0.362993	SPBC3H7.01	853.462	498.39	0.583963					2B
SPNCRNA.1498	115.663	52.9602	0.457885	SPBC15C4.04c	1393.98	756.06	0.542375					1B/2B
SPNCRNA.400	23.1746	3.14334	0.135637	SPBC365.16	1103.11	575.32	0.521542					1A
SPNCRNA.1561	288.332	56.8791	0.19727	SPBP4H10.15	7424.65	4994.89	0.672744					1A
SPNCRNA.1567	121.909	51.1064	0.419218	SPBC2A9.06c	411.711	265.047	0.64377					1B
SPNCRNA.1674	48.957	8.20352	0.167566	SPBC1861.01c	1676.45	400.591	0.238952					1B
SPNCRNA.1693	35.9766	7.13472	0.198316	SPBC8E4.03	335.592	199.141	0.593403					1B
SPNCRNA.1316	113.843	56.753	0.498519	SPBC1683.05	1064.81	450.308	0.422899					1B/2B
SPNCRNA.1319	97.581	1.03727	0.0106298	SPBC1683.08	288.015	8092.34	28.0969					2B
SPNCRNA.1359	89.0598	31.0327	0.348448	SPBC428.03c	1564.16	542.663	0.346935					3A
SPNCRNA.1375	16.4327	1.33046	0.0809643	SPBC839.15c	3249.58	2196.24	0.675853					3A
SPNCRNA.1397	86.5985	23.9389	0.276436	SPBC216.03	388.545	991.524	2.55189					1B
SPNCRNA.1403	40.4117	9.20925	0.227886	SPBC146.02	51.2638	251.716	4.91021					2B
SPNCRNA.1409	63.5863	26.2027	0.41208	SPBC1734.11	14206.2	5575.76	0.392489					1B
SPNCRNA.1424	176.324	41.4463	0.235057	SPBC3D6.02	30208.5	11745.6	0.388818					1A
SPNCRNA.1463	120.252	54.6376	0.454358	SPBC18H10.04c	11305.3	5467.23	0.483599					1A
SPNCRNA.1471	109.895	33.7883	0.307458	SPBC3H7.07c	1273.6	575.955	0.452225					1B/2B
SPNCRNA.1518	184.968	75.9506	0.410615	SPBC12C2.06	2852.7	1662.23	0.582685					1A
SPNCRNA.1533	107.296	42.556	0.396623	SPBC25B2.02c	465.079	4674.85	10.0517					1A
SPNCRNA.1560	123.704	22.9017	0.185132	SPBP4H10.09	12.6394	649.866	51.4158	SPBP4H10.10	49.282	696.798	14.139	2B/2B
SPNCRNA.1581	74.9018	32.3632	0.432075	SPBC4C3.05c	12714.6	5089.96	0.400325					1B
SPNCRNA.1602	186.974	39.5925	0.211754	SPBC1718.03	833.585	277.277	0.332632					1B
SPNCRNA.1618	164.425	74.8468	0.455203	SPBC418.01c	1542.56	1019.7	0.661041					3A
SPNCRNA.1623	37.6254	7.87879	0.209401	SPBC16D10.11c	1308.65	791.464	0.604792					3A
SPNCRNA.1673	114.525	43.404	0.378991	SPBC1861.01c	1676.45	400.591	0.238952	SPBC1861.02	1634.56	277.894	0.170011	1A/2B
SPNCRNA.1697	33.8483	3.04872	0.0900704	SPBPB2B2.13	613.688	8064.86	13.1416					2B
SPNCRNA.1099	188.452	74.3456	0.394507	SPCC1884.02	916.787	534.714	0.583248					3A
SPNCRNA.1114	41.5651	10.8644	0.261384	SPCC320.08	1735.36	1007.13	0.580356					1B
SPNCRNA.1143	273.394	100.715	0.368389	SPCC1672.03c	749.951	401.635	0.535548					2B
SPNCRNA.1157	229.554	87.6655	0.381895	SPCC1020.09	64.5532	19.9697	0.309353					3B
SPNCRNA.1102	54.042	17.2551	0.31929	SPCC613.01	598.304	333.592	0.557563					1B
SPNCRNA.1103	985.932	461.945	0.468536	SPCC613.06	8944.85	4155.5	0.464569	SPCC613.07	282.224	142.969	0.506579	2B/1B
SPNCRNA.1192	20.8678	1.39353	0.0667791	SPCC1281.08	181.532	521.827	2.87458					2B
SPNCRNA.1206	66.2181	13.0967	0.197781	SPCC162.07	4487.07	6933.96	1.54532					3A
SPNCRNA.1279	215.51	88.823	0.412152	SPCC1840.12	53.0511	241.722	4.5564					2B
SPNCRNA.1293	80.8314	13.787	0.170565	SPCC1827.04	804.707	515.679	0.640829					1B
SPNCRNA.877/876	41.0696	6.32757	0.154069	SPAC1786.02	6714.14	1848.5	0.275314					1B

## Sheet: ncRNAs2
S2_2 Table. List of ncRNAs induced or repressed >2-fold on glycerol whose neighbouring genes show no significant expression changes
for some of this ncRNA visual inspection suggested that they may neighbour genes that change their expression. In this cases type of the possible arrangement is indicated.
ncRNA				possible type of arrangeent (see S3 Fig)
ncRNA	BaseMean_Glu	BaseMean_Gly	fold change
SPNCRNA.1061	83.2766	8.45582	0.101539
SPNCRNA.1635	54.7	5.60567	0.10248
SPNCRNA.944	181.734	18.7748	0.103309
SPNCRNA.1606	134.906	16.24	0.12038
SPNCRNA.766	51.4424	6.84152	0.132994	l 1B
SPNCRNA.472	22.0132	3.04872	0.138495
SPNCRNA.1190	40.8991	6.34975	0.155254
SPNCRNA.1264	116.978	18.7339	0.160148	l 2B
SPNCRNA.1296	215.063	35.5159	0.165142	l 1A
SPNCRNA.1096	301.507	55.12	0.182815
SPNCRNA.1343	227.54	41.8878	0.18409
SPNCRNA.782	38.2754	7.5856	0.198185
SPNCRNA.1487	86.4119	17.3812	0.201144	l 2B
SPNCRNA.648	83.1463	17.4128	0.209423	l 2B
SPNCRNA.1382	56.3409	12.0279	0.213484
SPNCRNA.1370	36.139	8.88452	0.245843	l 2B
SPNCRNA.888	38.6164	9.89025	0.256115	l 2B
SPNCRNA.1230	63.2453	16.6687	0.263556	l 2B
SPNCRNA.1297	73.0985	20.1052	0.275043	l 1B
SPNCRNA.781	65.5441	18.6486	0.28452
SPNCRNA.1656	109.278	31.1274	0.284846	l 1B
SPNCRNA.965	52.2387	15.0766	0.288609
SPNCRNA.779	60.451	17.7784	0.294096
SPNCRNA.1690	422.987	133.045	0.314536	l 2B
SPNCRNA.1091	51.7593	16.2809	0.31455
SPNCRNA.767	149.015	47.3639	0.317846	l 1B
SPNCRNA.1285	222.479	71.3693	0.320791	l 2B
SPNCRNA.630	70.1337	22.5991	0.322229
SPNCRNA.1277	83.1463	30.0807	0.361781	l 2B
SPNCRNA.722	81.1724	30.9381	0.381141	l 2B
SPNCRNA.1532	178.729	68.7178	0.38448
SPNCRNA.885	86.7529	33.9553	0.391402	l 2B
SPNCRNA.1395	220.034	90.6581	0.412019
SPNCRNA.1269	188.119	80.3987	0.427382	l 1B
SPNCRNA.1308	119.44	51.6519	0.432452	l 1B
SPNCRNA.159	113.998	52.7301	0.462554	l 1A
SPNCRNA.442	117.458	56.5731	0.481646	l 1B
SPNCRNA.29	4.27266	180.363	42.2133
SPNCRNA.1577	2.13633	37.7353	17.6636	l 1B
SPNCRNA.584	2.13633	31.2407	14.6235	l 2B
SPNCRNA.1210	15.2793	103.026	6.74286	l 3A
SPNCRNA.1280	91.172	589.411	6.46482	l 2B
SPNCRNA.1127	25.2949	64.0232	2.53107	l 3A
SPNCRNA.1214	30.5585	75.7451	2.47869
SPNCRNA.622	80.027	191.764	2.39624	l 3B
SPNCRNA.01	164.473	388.771	2.36373	l 3B
SPNCRNA.1331	3.77719	23.1002	6.11573	l 2B

## Sheet: data for Fig 3 D
S2_3 Table. List of differentially regulated genes and GO categories used in Fig 3 D
Induced genes, GO Process
		p value
meiotic cell cycle	GO:0051321	0.4444	SPAC11E3.06	SPAC1565.04c	SPAC167.06c	SPAC18B11.04	SPAC19A8.05c	SPAC1F8.05	SPAC22F3.09c	SPAC23E2.03c	SPAC24C9.15c	SPAC27D7.03c	SPAC27D7.13c	SPAC29A4.12c	SPAC32A11.01	SPAC458.04c	SPAC4F10.07c	SPAC513.03	SPAC5D6.08c	SPAC5D6.09c	SPAC5D6.10c	SPAC6G9.16c	SPAC8C9.03	SPAC8C9.16c	SPAC8F11.05c	SPAPB8E5.05	SPBC106.10	SPBC119.04	SPBC1604.01	SPBC19C2.05	SPBC19C7.10	SPBC19F8.06c	SPBC24C6.06	SPBC32H8.02c	SPBC359.06	SPBC409.03	SPBC56F2.06	SPBC646.17c	SPBC660.07	SPBC725.06c	SPBPJ4664.03	SPCC1235.12c	SPCC1235.13	SPCC1281.08	SPCC320.07c	SPCC550.10	SPCP31B10.06
carbohydrate metabolic process	GO:0005975	7.76e-06	SPAC1039.11c	SPAC12B10.13	SPAC13F5.03c	SPAC144.12	SPAC17C9.12	SPAC227.15	SPAC22A12.11	SPAC22F8.05	SPAC26F1.07	SPAC26H5.04	SPAC26H5.08c	SPAC2F3.05c	SPAC30D11.01c	SPAC4D7.02c	SPAC4G9.12	SPAC4H3.03c	SPAC513.05	SPAC6C3.04	SPAC732.02c	SPACUNK4.10	SPAP32A8.02	SPAPB1A10.04c	SPAPB24D3.10c	SPBC106.10	SPBC106.13	SPBC32F12.01c	SPBC660.07	SPBP4H10.09	SPBPB2B2.10c	SPBPB2B2.11	SPBPB2B2.12c	SPBPB2B2.13	SPCC1020.06c	SPCC1223.03c	SPCC191.11	SPCC306.08c	SPCC4F11.04c	SPCC794.01c	SPCPJ732.02c
conjugation with cellular fusion	GO:0000747	9.74e-08	SPAC11E3.06	SPAC11H11.04	SPAC1296.03c	SPAC144.13c	SPAC1565.04c	SPAC18B11.04	SPAC1A6.04c	SPAC20G4.02c	SPAC22F3.12c	SPAC23E2.03c	SPAC27D7.13c	SPAC31G5.09c	SPAC4A8.04	SPAC4F10.07c	SPAC513.03	SPAP11E10.02c	SPAPB8E5.05	SPBC106.10	SPBC19C2.05	SPBC1D7.05	SPBC21D10.06c	SPBC24C6.06	SPBC25B2.02c	SPBC32C12.02	SPBP8B7.24c	SPBPJ4664.03	SPCC1442.01
Induced genes, GO Component
mitochondrion	GO:0005739	0.02737	SPAC1039.07c	SPAC1039.10	SPAC11G7.03	SPAC13F5.03c	SPAC1486.01	SPAC14C4.14	SPAC1635.01	SPAC167.06c	SPAC1687.22c	SPAC17A2.11	SPAC17C9.06	SPAC1952.09c	SPAC19D5.01	SPAC20G4.05c	SPAC222.12c	SPAC24C9.06c	SPAC26F1.04c	SPAC26F1.14c	SPAC29A4.17c	SPAC2E1P3.01	SPAC3A12.02	SPAC3A12.08	SPAC4D7.02c	SPAC5D6.10c	SPAC6C3.04	SPAC8C9.16c	SPAC8F11.05c	SPAPB2B4.06	SPBC11C11.06c	SPBC1271.14	SPBC12C2.08	SPBC146.02	SPBC15D4.11c	SPBC16H5.06	SPBC1734.13	SPBC19C2.04c	SPBC19G7.18c	SPBC1A4.06c	SPBC21B10.14	SPBC26H8.12	SPBC27B12.01c	SPBC32F12.01c	SPBC36.10	SPBC725.10	SPBC776.15c	SPBC800.14c	SPBC902.05c
plasma membrane	GO:0005886	0.0003369	SPAC11D3.18c	SPAC11H11.04	SPAC16A10.01	SPAC17C9.16c	SPAC17G6.02c	SPAC18B11.04	SPAC1A6.04c	SPAC1F7.08	SPAC1F8.01	SPAC20H4.11c	SPAC2F3.08	SPAC513.03	SPAC5D6.09c	SPAC869.05c	SPAPB8E5.05	SPBC1348.14c	SPBC15C4.06c	SPBC1683.08	SPBC1683.09c	SPBC1D7.05	SPBC24C6.06	SPBC29B5.02c	SPBC32F12.01c	SPBC36.03c	SPBPJ4664.03	SPCC1235.13	SPCC1235.14	SPCC1753.02c	SPCC1840.12	SPCC1919.03c	SPCC548.07c	SPCC794.04c
vacuole	GO:0005773	0.008529	SPAC1006.01	SPAC11H11.04	SPAC1399.01c	SPAC1D4.03c	SPAC227.15	SPAC26H5.04	SPAC2F3.08	SPAC2G11.13	SPAC3A11.06	SPAC4A8.04	SPAC513.05	SPAC57A7.09	SPAC589.07c	SPAC5D6.09c	SPAC823.16c	SPAPB2B4.04c	SPBC106.10	SPBC15C4.06c	SPBP8B7.24c	SPCC162.06c	SPCC191.11	SPCC338.12	SPCC737.09c
Repressed genes, GO Process
cytoplasmic translation	GO:0002181	1.26827e-23	SPAC3F10.18c	SPAPB17E12.13	SPBC18H10.04c	SPAC17A5.03	SPBC2G5.03	SPCP31B10.07	SPAC13G6.07c	SPAC1071.08	SPAC1805.12c	SPAC644.15	SPBC25H2.07	SPAC6G9.09c	SPBC17A3.04c	SPBC29A3.12	SPAC1006.07	SPAC22H12.04c	SPCC1682.14	SPCC663.04	SPAC1250.05	SPAC26H5.10c	SPAC23C11.02c	SPAC664.04c	SPAC959.08	SPAC57A7.12	SPCC970.05	SPAC29A4.02c	SPCP1E11.11	SPCC285.15c	SPCC31H12.04c	SPAC1F7.13c	SPAC3G9.03	SPCC74.05	SPBC21B10.10	SPBP8B7.06	SPBC11C11.07	SPAC1783.08c	SPAC3H5.10	SPBC365.03c	SPCC622.18	SPAC5D6.01	SPBC800.04c	SPAC22A12.04c	SPAC8C9.08	SPBC11C11.09c	SPAC15A10.04c	SPAC2C4.16c	SPBC29B5.03c
ribosome biogenesis	GO:0042254	1.03e-71	SPAC1071.07c	SPAC1142.04	SPAC1250.05	SPAC12G12.02	SPAC12G12.06c	SPAC13G6.07c	SPAC140.02	SPAC1486.09	SPAC1565.05	SPAC1687.11	SPAC16C9.03	SPAC16E8.06c	SPAC1782.10c	SPAC17A5.03	SPAC17H9.05	SPAC1805.12c	SPAC18B11.06	SPAC18G6.07c	SPAC18G6.14c	SPAC19A8.07c	SPAC19D5.05c	SPAC1B3.13	SPAC1B9.03c	SPAC1F7.02c	SPAC20G8.09c	SPAC222.06	SPAC227.02c	SPAC22E12.13c	SPAC22F3.08c	SPAC22F8.09	SPAC22G7.05	SPAC22H12.04c	SPAC23H4.15	SPAC25G10.06	SPAC25H1.08c	SPAC26A3.17c	SPAC2C4.11c	SPAC2C4.16c	SPAC2E1P5.05	SPAC2F7.14c	SPAC31A2.07c	SPAC31G5.17c	SPAC328.10c	SPAC3C7.08c	SPAC3F10.16c	SPAC3H5.05c	SPAC4F10.09c
rRNA processing	GO:0006364	1.48651e-33	SPBC21H7.04	SPBC19F5.05c	SPAC22F3.08c	SPBC1703.05	SPAC22F8.09	SPBC29A3.16	SPAC2C4.11c	SPBC30D10.15	SPBC1734.01c	SPAC1565.05	SPCC1827.01c	SPAC1250.05	SPAC1F7.02c	SPBC776.17	SPBC800.06	SPCC1183.07	SPBC19F5.02c	SPAC56F8.09	SPAC823.08c	SPBC13G1.09	SPBC713.04c	SPAC2E1P5.05	SPAC23H4.15	SPCC285.15c	SPAC17H9.05	SPAC16E8.06c	SPAC12G12.06c	SPAC19A8.07c	SPBC17D1.06	SPAC6G9.10c	SPAP27G11.13c	SPBC20F10.01	SPBC776.08c	SPCC1494.06c	SPAC1B3.13	SPAC9G1.03c	SPBC17G9.07	SPBC25B2.05	SPAC1782.10c	SPCC1450.03	SPBC9B6.07	SPAC227.02c	SPAC890.04c	SPCC1840.11	SPBC29A3.06	SPAC607.03c	SPCC1739.07
Repressed genes, GO Component
nucleolus	GO:0005730	1.74e-67	SPAC1071.07c	SPAC1142.04	SPAC11E3.15	SPAC12G12.02	SPAC12G12.06c	SPAC13D6.02c	SPAC140.02	SPAC1486.09	SPAC1565.05	SPAC1687.01	SPAC1687.11	SPAC16E8.06c	SPAC1782.10c	SPAC1783.08c	SPAC17H9.04c	SPAC17H9.05	SPAC1805.12c	SPAC18B11.06	SPAC18G6.07c	SPAC18G6.14c	SPAC19A8.07c	SPAC19B12.11c	SPAC19D5.05c	SPAC1B3.12c	SPAC1B3.13	SPAC1B9.03c	SPAC1F7.02c	SPAC20G8.09c	SPAC222.06	SPAC227.02c	SPAC22E12.13c	SPAC22F3.08c	SPAC22F8.09	SPAC22G7.05	SPAC23A1.11	SPAC23C11.02c	SPAC23C4.15	SPAC23H4.15	SPAC26A3.04	SPAC26H5.10c	SPAC27F1.06c	SPAC2C4.06c	SPAC2C4.11c	SPAC2E1P5.05	SPAC2F3.03c	SPAC31A2.07c	SPAC3H5.05c
ribosome	GO:0005840	3.74e-37	SPAC1071.07c	SPAC1071.08	SPAC11E3.15	SPAC1250.05	SPAC13G6.07c	SPAC1687.06c	SPAC1783.08c	SPAC17A5.03	SPAC1805.12c	SPAC18G6.14c	SPAC1F7.13c	SPAC22A12.04c	SPAC22E12.13c	SPAC22H12.04c	SPAC23A1.11	SPAC23C11.02c	SPAC25G10.06	SPAC26A3.04	SPAC26H5.10c	SPAC2C4.16c	SPAC31G5.17c	SPAC328.10c	SPAC3A12.10	SPAC3F10.18c	SPAC3G9.03	SPAC3H5.05c	SPAC3H5.07	SPAC3H5.10	SPAC4F10.14c	SPAC4G9.16c	SPAC521.05	SPAC589.10c	SPAC5D6.01	SPAC644.15	SPAC664.04c	SPAC664.06	SPAC6F6.07c	SPAC6G10.11c	SPAC6G9.09c	SPAC806.03c	SPAC890.08	SPAC8C9.08	SPAC959.07	SPAC959.08	SPAC9G1.03c	SPAP7G5.05	SPAPB17E12.13
[truncated: 98 more columns]
