# Supplementary material for: Functional and Regulatory Profiling of Energy Metabolism in Fission Yeast
Source: Preprints.org preprint supplement (doi:10.20944/preprints201610.0054.v1), 2016-10-14
Supplement: Supplementary file 1 [file supplementary › Additional file 3.xlsx]

## Sheet: Genetic_screen_results
S1 Table- Colony size ratios from 9 genetic screens for respiratory mutants
GAL1, GAL2 - colony size ratios of deletion mutants grown on galactose/deletions grown on glucose; two biological repeats of deletion collection in prototroph background
GLY1, GLY2 - colony size ratios of deletion mutants grown on gycerol/deletions grown on glucose; two biological repeats of deletion collection in prototroph background
GAL_ANT - colony size ratios of deletion mutants grown on galactose with addition af antimicin A/deletions grown on glucose; one repeat, deletion collection in prototroph background
GLY_ANT - colony size ratios of deletion mutants grown on glycerol with addition af antimicin A/deletions grown on glucose; one repeat, deletion collection in prototroph background
GLY_DNP - colony size ratios of deletion mutants grown on glycerol with addition of 2,4-Dinitrophenol/deletions grown on glucose; one repeat, deletion collection in prototroph background
GAL_B - colony size ratios of deletion mutants grown on galactose/deletions grown on glucose; one repeat, deletion collection in auxotroph background
GLY_B - colony size ratios of deletion mutants grown on galactose/deletions grown on glucose; one repeat, deletion collection in auxotroph background
id	GAL1	GAL2	GLY1	GLY2	GAL_ANT	GLY_ANT	GLY_DNP	GAL_B	GLY_B	cluster P	cluster A	genes affecting growth in auxotroph and prototroph	affecting respiratory growth in s.p. but not in s.c.	genes affecting respiratory growth in s.p. and s.c.	transcrition factors	RNA binding
SPAC23C11.08	0.632	0.469	0.273	0.394	0.447	0.347	0.351	0.561	0.37	1	NA	1	NA	1	1	NA
SPBC1198.11c	0.559	0.609	0.19	0.217	0.311	0.198	0.186	0.542	0.295	1	NA	1	1	NA	1	NA
SPBC56F2.05c	1.434	1.446	0.97	0.814	1.224	0.529	0.931	1.217	1.244	NA	NA	NA	NA	NA	1	NA
SPBC21B10.13c	1.388	1.18	1.743	1.235	1.1	1.356	1.447	1.228	1.58	NA	NA	NA	NA	NA	1	NA
SPBC3B8.02	1.314	1.368	0.916	1.404	1.231	1.111	0.935	0.824	1.07	NA	NA	NA	NA	NA	1	NA
SPCC1223.13	1.255	1.095	1.092	1.446	1.207	1.309	0.947	1.223	1.287	NA	NA	NA	NA	NA	1	NA
SPBC19C2.09	1.224	1.218	1.201	1.509	1.2	1.671	1.026	0.924	1.34	NA	NA	NA	NA	NA	1	NA
SPBC530.11c	1.222	1.122	1.171	0.982	1.078	0.979	1.096	1.046	0.932	NA	NA	NA	NA	NA	1	NA
SPBC354.05c	1.199	1.28	1.34	1.495	1.358	1.716	1.09	0.989	0.979	NA	NA	NA	NA	NA	1	NA
SPBC1105.14	1.18	1.182	1.14	1.035	1.161	0.965	0.866	1.146	0.842	NA	NA	NA	NA	NA	1	NA
SPAC1142.08	1.171	1.123	1.135	1.137	1.154	1.029	1.14	1.104	1.166	NA	NA	NA	NA	NA	1	NA
SPAC25B8.19c	1.166	1.035	0.978	1.009	1.036	0.879	0.97	1.499	0.902	NA	NA	NA	NA	NA	1	NA
SPAC6G10.12c	1.149	0.912	0.849	0.845	0.789	0.76	0.947	0.968	1.106	NA	NA	NA	NA	NA	1	NA
SPBC1773.12	1.118	1.163	1.108	1.045	1.153	0.989	0.993	1.22	0.874	NA	NA	NA	NA	NA	1	NA
SPAC1327.01c	1.108	1.031	1.007	1.07	1.051	1.083	1.044	1.027	0.9	NA	NA	NA	NA	NA	1	NA
SPCC320.03	1.09	1.072	1.05	0.904	0.932	0.751	1.074	1.122	1.063	NA	NA	NA	NA	NA	1	NA
SPAC821.07c	1.089	1.062	0.871	0.921	1.105	0.892	0.841	0.974	0.917	NA	NA	NA	NA	NA	1	NA
SPBC1773.16c	1.089	1.05	0.959	1.018	1.036	0.999	1.003	0.986	0.881	NA	NA	NA	NA	NA	1	NA
SPAC25G10.03	1.084	1.007	0.784	0.869	1.028	0.765	0.877	1.353	0.952	NA	NA	NA	NA	NA	1	NA
SPBC4C3.12	1.079	0.979	0.786	0.847	1.067	0.941	0.88	1.099	1.215	NA	NA	NA	NA	NA	1	NA
SPAC3C7.04	1.071	0.969	1.174	1.304	0.88	0.91	1.097	1.161	1.354	NA	NA	NA	NA	NA	1	NA
SPCC285.17	1.068	1.006	1.063	1.091	1.043	1.065	0.961	1.564	1.258	NA	NA	NA	NA	NA	1	NA
SPAC1039.05c	1.066	1.057	1.062	1.141	1.094	1.058	1.01	1.046	1.06	NA	NA	NA	NA	NA	1	NA
SPCC1393.08	1.056	0.925	1.116	0.961	1.057	0.961	1.039	0.889	0.879	NA	NA	NA	NA	NA	1	NA
SPAC21E11.03c	1.048	1.005	0.948	0.926	1.015	0.938	0.998	1.04	0.942	NA	NA	NA	NA	NA	1	1
SPCC1494.10	1.046	1.111	1.003	1.235	1.257	1.344	0.874	1.023	1.047	NA	NA	NA	NA	NA	1	NA
SPCC965.10	1.044	1.101	1.011	0.967	1.039	0.958	1.001	0.923	0.976	NA	NA	NA	NA	NA	1	NA
SPCC584.02	1.042	1.057	0.968	1.001	1.125	0.976	1.024	0.982	1.298	NA	NA	NA	NA	NA	1	NA
SPBC530.08	1.041	0.986	1.032	0.986	0.978	0.984	0.887	0.945	0.78	NA	NA	NA	NA	NA	1	NA
SPAC3H8.08c	1.026	0.998	1.167	0.983	0.995	0.993	1.013	1.288	1.636	NA	NA	NA	NA	NA	1	NA
SPBC16G5.15c	1.018	1.062	1.084	0.98	1.032	0.906	1.071	0.498	0.73	NA	1	NA	1	NA	1	NA
SPBC2F12.09c	1.005	0.968	0.982	0.951	0.987	0.947	1.01	0.987	0.959	NA	NA	NA	NA	NA	1	NA
SPAC139.03	1.004	1.002	1.023	0.96	0.981	0.987	1.147	0.997	1.015	NA	NA	NA	NA	NA	1	NA
SPBC1778.02	0.999	0.927	1.186	1.136	0.998	1.108	1.046	1.184	1.422	NA	NA	NA	NA	NA	1	NA
SPAC1783.07c	0.997	1.005	1.008	1.006	0.981	0.929	0.968	0.968	0.889	NA	NA	NA	NA	NA	1	NA
SPBC317.01	0.992	0.995	1.055	0.988	0.985	0.993	0.988	0.947	0.941	NA	NA	NA	NA	NA	1	NA
SPBC1683.13c	0.99	0.965	1.047	0.96	0.974	1.03	1.05	0.93	0.859	NA	NA	NA	NA	NA	1	NA
SPAC25B8.11	0.977	1.105	0.964	1.144	1.192	1.118	0.992	1.078	0.922	NA	NA	NA	NA	NA	1	NA
SPAC1399.05c	0.976	1.08	1.101	0.918	0.976	0.872	1.004	0.952	1.107	NA	NA	NA	NA	NA	1	NA
SPCC777.02	0.962	0.931	0.979	1.051	0.957	1.036	0.997	0.946	1.078	NA	NA	NA	NA	NA	1	NA
SPAC22F3.02	0.946	0.938	0.909	1.18	1.102	1.187	0.882	0.759	0.942	NA	NA	NA	NA	NA	1	NA
SPBC16G5.17	0.946	1.013	1.046	1.116	1.061	1.058	0.946	1.01	1.076	NA	NA	NA	NA	NA	1	NA
SPAC8C9.14	0.943	0.959	0.977	0.944	0.966	0.994	1.025	1.01	0.941	NA	NA	NA	NA	NA	1	NA
SPBC16G5.16	0.942	0.949	1.055	1.215	0.949	0.94	0.942	1.076	0.866	NA	NA	NA	NA	NA	1	NA
SPBC530.05	0.941	1.047	1.039	1.328	1.024	1.25	1.262	0.928	1.048	NA	NA	NA	NA	NA	1	NA
SPAC56F8.16	0.937	0.944	1.18	1.009	0.934	1.005	1.149	0.991	1.002	NA	NA	NA	NA	NA	1	NA
SPAPB24D3.01	0.925	0.967	1.045	1.097	0.971	1.045	0.958	1.016	1.076	NA	NA	NA	NA	NA	1	NA
SPAC32A11.03c	0.92	1.021	0.973	1.103	1.109	1.174	0.949	0.913	0.985	NA	NA	NA	NA	NA	1	NA
SPCC1902.01	0.914	0.846	1.126	1.093	0.923	1.258	1.102	0.974	1.126	NA	NA	NA	NA	NA	1	NA
SPAC3H1.11	0.904	0.808	1.085	0.946	0.575	0.883	1.096	1.456	1.674	NA	NA	NA	NA	NA	1	NA
SPAC105.03c	0.899	0.978	1.002	0.894	0.95	0.94	1.011	1.008	0.95	NA	NA	NA	NA	NA	1	NA
SPCC417.09c	0.892	0.904	1.018	1.056	0.936	1.103	1.001	1.008	0.965	NA	NA	NA	NA	NA	1	NA
SPCC757.04	0.889	0.937	0.99	1.023	0.981	1.038	1.039	0.902	0.867	NA	NA	NA	NA	NA	1	NA
SPAC4G8.13c	0.883	1.004	0.863	1.101	1.036	1.081	0.898	1.549	1.105	NA	NA	NA	NA	NA	1	NA
SPAC23E2.01	0.857	0.856	0.902	1.147	0.89	1.028	0.843	1.095	1.121	NA	NA	NA	NA	NA	1	NA
SPBC27B12.11c	0.856	0.852	1.274	0.998	0.705	1.21	1.16	0.984	0.783	NA	NA	NA	NA	NA	1	NA
SPCC736.08	0.842	0.87	0.918	1.069	0.839	1.102	1.012	0.891	1.082	NA	NA	NA	NA	NA	1	NA
SPAC11D3.17	0.829	0.708	0.926	0.974	0.813	0.941	0.954	1.057	0.921	NA	NA	NA	NA	NA	1	NA
SPAC11D3.07c	0.804	0.914	0.992	1.199	0.931	1.071	1.019	0.787	1.025	NA	NA	NA	NA	NA	1	NA
SPAC1F7.11c	0.791	0.849	0.929	0.898	0.861	0.994	0.914	0.74	0.897	NA	NA	NA	NA	NA	1	NA
SPAC2H10.01	0.786	0.974	0.829	0.757	0.923	0.903	0.908	0.839	0.899	NA	NA	NA	NA	NA	1	NA
SPBPB8B6.04c	0.783	0.877	0.88	1.049	0.9	0.989	0.92	0.818	1.018	NA	NA	NA	NA	NA	1	NA
SPBC32H8.11	0.774	0.942	0.876	0.89	0.872	1.063	0.959	0.878	0.991	NA	NA	NA	NA	NA	1	NA
SPAPB1A11.04c	0.765	0.817	0.789	0.832	0.747	0.678	0.808	0.765	0.873	NA	NA	NA	NA	NA	1	NA
SPBP8B7.30c	0.715	0.895	0.983	0.918	0.897	1.036	0.94	0.793	0.946	NA	NA	NA	NA	NA	1	NA
SPAC1565.03	1.348	0.865	0.366	0.532	0.796	0.375	0.353	0.807	1.048	1	NA	NA	1	NA	NA	NA
SPAPB1A10.14	1.025	1.003	0.572	0.428	0.819	0.421	0.658	1.507	0.871	1	NA	NA	1	NA	NA	NA
SPBC27.06c	1.012	0.838	0.829	0.527	0.748	0.557	0.597	0.951	0.673	1	NA	NA	NA	1	NA	NA
SPAC17H9.12c	0.891	0.904	0.568	0.573	0.656	0.41	0.715	0.823	0.778	1	NA	NA	NA	1	NA	NA
SPAC6F6.01	0.887	0.811	0.499	0.428	0.705	0.133	0.466	0.664	0.435	1	NA	NA	1	NA	NA	NA
SPBC30B4.06c	0.883	0.899	0.994	0.805	0.271	0.16	0.899	0.843	0.717	1	NA	NA	NA	1	NA	NA
SPBC36.11	0.865	0.898	0.728	0.64	0.627	0.356	0.608	0.967	0.883	1	NA	NA	1	NA	NA	NA
SPAC4A8.04	0.83	0.825	0.708	0.671	0.562	0.432	0.698	0.785	0.74	1	NA	1	1	NA	NA	NA
SPBC32F12.12c	0.817	0.819	0.753	0.695	0.534	0.434	0.812	0.959	0.853	1	NA	NA	1	NA	NA	NA
SPBC428.02c	0.815	0.767	0.873	0.465	0.882	0.414	0.983	1.002	0.853	1	NA	NA	1	NA	NA	NA
SPAC959.04c	0.807	0.716	0.646	0.596	0.548	0.311	0.69	1.241	0.844	1	NA	NA	1	NA	NA	NA
SPAC1071.11	0.804	0.736	0.366	0.257	0.475	0.19	0.376	0.51	0.386	1	NA	1	1	NA	NA	NA
SPAC1782.08c	0.771	0.797	0.691	0.75	0.502	0.225	0.539	0.75	0.692	1	NA	1	1	NA	NA	NA
SPAC3F10.05c	0.762	0.787	0.576	0.55	0.751	0.543	0.82	0.705	0.642	1	NA	1	1	NA	NA	NA
SPAC2F7.09c	0.748	0.84	0.664	0.649	0.642	0.609	0.631	0.856	0.807	1	NA	NA	NA	1	NA	NA
SPBC16C6.04	0.744	0.666	0.643	0.601	0.555	0.315	0.653	0.837	0.936	1	NA	NA	1	NA	NA	NA
SPAC9E9.10c	0.743	0.684	0.582	0.563	0.514	0.264	0.479	0.875	0.852	1	NA	NA	1	NA	NA	NA
SPCC584.03c	0.737	0.696	0.85	0.803	0.589	0.467	0.73	1.084	0.971	1	NA	NA	1	NA	NA	NA
SPAC688.11	0.734	0.691	0.642	0.658	0.594	0.463	0.435	0.704	0.756	1	NA	1	1	NA	NA	NA
SPAC1A6.04c	0.722	0.585	0.734	0.741	0.581	0.639	0.919	0.726	0.57	1	NA	NA	1	NA	NA	NA
SPAC12B10.11	0.721	0.716	0.712	0.678	0.45	0.403	0.711	0.888	1.009	1	NA	NA	1	NA	NA	NA
SPBC1709.09	0.72	0.648	0.787	0.622	0.552	0.619	0.542	0.831	0.976	1	NA	NA	NA	1	NA	1
SPBC660.10	0.72	0.873	0.642	0.665	0.807	0.554	0.482	0.598	0.612	1	NA	NA	NA	1	NA	1
SPBC56F2.11	0.713	0.676	0.774	0.71	0.401	0.268	0.88	1.199	1.061	1	NA	NA	1	NA	NA	NA
SPAC1D4.05c	0.712	0.769	0.393	0.293	0.539	0.229	0.379	0.539	0.673	1	NA	1	1	NA	NA	NA
SPBC1215.01	0.71	0.774	0.545	0.6	0.721	0.578	0.468	0.705	0.599	1	NA	1	NA	1	NA	NA
SPBC83.18c	0.704	0.689	0.893	0.599	0.505	0.433	0.737	0.976	0.932	1	NA	NA	1	NA	NA	NA
SPAC18G6.13	0.702	0.673	0.558	0.404	0.573	0.389	0.589	1.478	1.619	1	NA	NA	1	NA	NA	NA
SPAC3F10.06c	0.701	0.694	0.713	0.716	0.434	0.398	0.652	1.037	1.015	1	NA	NA	1	NA	NA	NA
SPAC3C7.03c	0.685	0.563	0.351	0.234	0.511	0.057	0.145	0.782	0.984	1	NA	NA	1	NA	NA	NA
SPCC576.12c	0.657	0.621	0.964	0.757	0.391	0.462	0.869	0.963	1.02	1	NA	NA	1	NA	NA	NA
SPAC14C4.06c	0.653	0.525	0.851	0.574	0.47	0.299	0.769	1.175	1.57	1	NA	NA	1	NA	NA	1
SPBC691.04	0.639	0.595	0.37	0.416	0.53	0.41	0.341	0.461	0.616	1	NA	1	NA	1	NA	NA
SPBC4B4.03	0.636	0.597	0.64	0.561	0.642	0.578	0.539	0.737	0.777	1	NA	1	1	NA	NA	NA
SPBC21C3.08c	0.629	0.593	0.234	0.222	0.343	0.18	0.185	1.814	1.099	1	NA	NA	1	NA	NA	NA
SPBC25B2.04c	0.625	0.746	0.654	0.724	0.598	0.624	0.571	0.724	0.754	1	NA	1	NA	1	NA	NA
SPBC8E4.02c	0.62	0.533	0.431	0.569	0.4	0.33	0.302	0.679	1.039	1	NA	NA	1	NA	NA	NA
SPAC30C2.02	0.617	0.732	0.678	0.559	0.636	0.533	0.526	0.553	0.489	1	NA	1	1	NA	NA	NA
SPAC31A2.13c	0.614	0.568	0.643	0.602	0.411	0.291	0.632	1.498	1.976	1	NA	NA	1	NA	NA	NA
SPBC428.15	0.611	0.687	0.721	0.6	0.37	0.266	0.707	0.851	0.973	1	NA	NA	1	NA	NA	NA
SPCC16A11.07	0.599	0.558	0.383	0.252	0.378	0.139	0.32	0.485	0.418	1	NA	1	NA	1	NA	NA
SPCC645.07	0.597	0.456	0.239	0.293	0.523	0.531	0.356	0.62	0.948	1	NA	NA	1	NA	NA	NA
SPBC2G2.03c	0.585	0.522	0.574	0.524	0.336	0.263	0.6	1.131	0.742	1	NA	NA	1	NA	NA	NA
SPCC736.11	0.581	0.587	0.708	0.529	0.526	0.345	0.59	1.538	1.099	1	NA	NA	1	NA	NA	1
SPCC1682.08c	0.578	0.581	0.646	0.612	0.433	0.456	0.581	1.086	1.235	1	NA	NA	NA	1	NA	1
SPCC4B3.15	0.578	0.526	0.493	0.338	0.318	0.171	0.346	1.051	1.062	1	NA	NA	1	NA	NA	NA
SPBC4F6.08c	0.572	0.619	0.464	0.466	0.516	0.398	0.452	0.534	0.519	1	NA	1	NA	1	NA	NA
SPCC31H12.06	0.568	0.564	0.648	0.492	0.539	0.311	0.511	1.087	1.002	1	NA	NA	1	NA	NA	NA
SPBC30D10.10c	0.555	0.564	0.561	0.611	0.529	0.354	0.577	0.88	0.938	1	NA	NA	1	NA	NA	NA
SPBC21H7.04	0.526	0.461	0.545	0.572	0.359	0.313	0.597	1.579	1.612	1	NA	NA	1	NA	NA	NA
SPAC1565.04c	0.517	0.162	0.103	0.152	0.132	0.015	0.058	1.052	0.977	1	NA	NA	1	NA	NA	NA
SPAC4F8.03	0.515	0.59	0.492	0.594	0.509	0.467	0.509	2.121	2.743	1	NA	NA	NA	1	NA	NA
SPBC27B12.10c	0.511	0.533	1.035	0.688	0.469	0.408	0.911	0.735	0.929	1	NA	NA	NA	1	NA	NA
SPAC227.17c	0.487	0.493	0.57	0.445	0.4	0.226	0.506	0.104	0.032	1	NA	1	NA	1	NA	NA
SPBC1D7.04	0.479	0.509	0.571	0.533	0.574	0.36	0.461	1.775	2.086	1	NA	NA	1	NA	NA	1
SPBP8B7.08c	0.475	0.453	0.691	0.463	0.365	0.293	0.598	0.579	0.555	1	NA	1	1	NA	NA	NA
SPAC17H9.08	0.433	0.435	0.493	0.475	0.357	0.27	0.517	0.414	0.481	1	NA	1	NA	1	NA	NA
SPAC3A12.12	0.429	0.357	0.257	0.251	0.354	0.343	0.203	0.366	0.44	1	NA	1	NA	1	NA	NA
SPAC4G9.20c	0.427	0.513	0.433	0.44	0.46	0.512	0.374	0.467	0.553	1	NA	1	1	NA	NA	NA
SPBC2G2.10c	0.412	0.381	0.186	0.14	0.446	0.041	0.028	0.944	0.923	1	NA	NA	1	NA	NA	NA
SPBC2G2.07c	0.407	0.338	0.282	0.172	0.139	0.126	0.255	0.302	0.329	1	NA	1	NA	1	NA	NA
SPAC2F7.17	0.4	0.428	0.307	0.183	0.346	0.22	0.254	0.311	0.32	1	NA	1	NA	1	NA	1
SPAC1952.09c	0.387	0.373	0.957	0.961	0.325	0.924	0.664	0.645	0.956	1	NA	NA	1	NA	NA	NA
SPAC17H9.09c	0.369	0.397	0.141	0.134	0.334	0.184	0.058	1.282	1.625	1	NA	NA	1	NA	NA	NA
SPBC336.01	0.367	0.453	0.628	0.458	0.321	0.299	0.618	0.932	0.941	1	NA	NA	1	NA	NA	NA
SPAC6F12.03c	0.343	0.364	0.297	0.336	0.38	0.319	0.221	0.901	1.163	1	NA	NA	1	NA	NA	NA
SPAC1071.02	0.325	0.347	0.349	0.405	0.316	0.305	0.448	1.377	1.38	1	NA	NA	NA	1	NA	NA
SPCC4B3.06c	0.305	0.331	0.273	0.195	0.322	0.159	0.274	0.925	1.042	1	NA	NA	1	NA	NA	NA
SPAC18G6.04c	0.295	0.386	0.486	0.475	0.324	0.267	0.392	0.549	0.564	1	NA	1	1	NA	NA	NA
SPBC106.07c	0.294	0.266	0.251	0.235	0.21	0.252	0.269	0.509	0.435	1	NA	1	1	NA	NA	NA
SPCC4G3.04c	0.292	0.41	0.186	0.157	0.249	0.14	0.208	0.379	0.315	1	NA	1	NA	1	NA	NA
SPBC36.04	0.275	0.305	0.414	0.496	0.295	0.274	0.351	0.434	0.729	1	NA	1	1	NA	NA	NA
SPAC6B12.05c	0.269	0.29	0.288	0.212	0.182	0.123	0.236	0.928	0.995	1	NA	NA	1	NA	NA	NA
SPCC553.01c	0.257	0.269	0.781	1.011	0.271	0.831	0.475	1.228	1.051	1	NA	NA	1	NA	NA	NA
SPBP23A10.16	0.247	0.277	0.959	1.082	0.249	0.97	0.477	0.406	1.171	1	NA	NA	NA	1	NA	NA
SPBC31F10.03	0.208	0.22	0.851	0.836	0.214	0.691	0.531	0.989	0.902	1	NA	NA	1	NA	NA	NA
SPBC25H2.16c	0.196	0.211	0.068	0.048	0.259	0.05	0.074	1.1	0.77	1	NA	NA	1	NA	NA	NA
SPBC16D10.11c	0.161	0.348	0.141	0.279	0.225	0.074	0.089	1.147	1.124	1	NA	NA	1	NA	NA	1
SPBC3H7.03c	0.158	0.141	0.318	0.241	0.146	0.29	0.229	0.239	0.61	1	NA	1	NA	1	NA	NA
SPCC576.14	0.133	0.103	0.957	0.915	0.228	0.985	0.672	0.314	1.217	1	NA	NA	1	NA	NA	NA
SPBC16A3.03c	0.128	0.116	0.185	0.095	0.107	0.114	0.183	0.179	0.149	1	NA	1	1	NA	NA	NA
SPBC2A9.02	0.128	0.207	0.217	0.41	0.421	0.544	0.147	0.926	0.949	1	NA	NA	1	NA	NA	NA
SPBC12D12.07c	0.122	0.096	0.19	0.099	0.219	0.248	0.15	0.15	0.166	1	NA	1	1	NA	NA	NA
SPCC16C4.12	0.103	0.101	0.906	0.892	0.228	0.873	0.641	0.207	1.573	1	NA	NA	NA	1	NA	NA
SPBC685.03	0.101	0.108	1.051	0.959	0.238	0.896	0.637	0.825	0.979	1	NA	NA	1	NA	NA	NA
SPBC1A4.02c	0.065	0.084	0.157	0.088	0.065	0.06	0.147	1.207	0.917	1	NA	NA	1	NA	NA	NA
SPBC365.14c	2.481	1.374	2.032	1.936	1.466	2.07	1.864	1.415	1.585	NA	NA	NA	NA	NA	NA	NA
SPAC23H3.03c	2.218	2.231	1.75	1.754	2.183	1.638	1.35	1.513	1.258	NA	NA	NA	NA	NA	NA	NA
SPBC31F10.10c	2.192	0.917	1.074	1.172	0.601	0.431	1.256	0.928	1.112	NA	NA	NA	NA	NA	NA	NA
SPBC1778.05c	2.154	1.942	2.026	1.685	2.069	1.881	1.703	1.374	1.311	NA	NA	NA	NA	NA	NA	NA
SPCC24B10.15	2.151	2.158	1.408	1.642	2.168	1.827	1.867	0.772	0.956	NA	NA	NA	NA	NA	NA	NA
SPCPB16A4.03c	1.933	1.307	1.196	0.894	1.15	1.442	1.911	1.035	1.223	NA	NA	NA	NA	NA	NA	NA
SPBC14F5.11c	1.901	1.296	1.071	1.002	1.293	0.88	1.212	0.94	1.023	NA	NA	NA	NA	NA	NA	NA
SPAC9G1.03c	1.896	1.896	2.265	1.918	1.999	2.221	1.64	1.894	1.854	NA	NA	NA	NA	NA	NA	NA
SPBC409.10	1.893	1.572	1.604	1.196	1.499	1.495	1.767	1.015	0.937	NA	NA	NA	NA	NA	NA	NA
SPAPB1E7.06c	1.868	1.734	1.837	1.336	1.568	1.662	1.504	1.99	1.972	NA	NA	NA	NA	NA	NA	NA
SPAPB24D3.04c	1.866	1.632	1.409	1.212	1.451	1.278	1.456	0.985	0.945	NA	NA	NA	NA	NA	NA	NA
SPBC660.17c	1.82	1.655	1.459	1.194	1.454	1.275	1.506	1.034	0.928	NA	NA	NA	NA	NA	NA	NA
SPAC144.04c	1.814	1.46	0.965	0.947	1.474	0.934	0.935	0.91	0.463	NA	NA	NA	NA	NA	NA	NA
SPBC651.11c	1.806	1.539	1.881	1.53	1.475	1.86	1.66	0.963	0.816	NA	NA	NA	NA	NA	NA	NA
SPAC3F10.17	1.799	1.863	2	1.481	1.768	1.729	1.772	1.462	1.244	NA	NA	NA	NA	NA	NA	NA
SPCC613.06	1.789	1.403	2.42	1.836	1.34	1.902	1.977	1.398	1.966	NA	NA	NA	NA	NA	NA	1
SPCC132.01c	1.789	1.875	1.672	1.293	1.818	1.58	1.829	0.936	0.965	NA	NA	NA	NA	NA	NA	NA
SPBC354.03	1.743	1.484	1.139	1.123	1.615	1.152	0.975	1.303	1.099	NA	NA	NA	NA	NA	NA	NA
SPBC1711.03	1.74	1.34	1.198	1.077	1.303	0.984	1.273	1.272	0.715	NA	NA	NA	NA	NA	NA	NA
SPAC13D6.02c	1.733	1.265	1.39	1.187	1.306	1.222	1.281	1.371	1.369	NA	NA	NA	NA	NA	NA	1
SPAC22F3.08c	1.727	1.515	1.264	1	1.555	1.517	1.356	1.585	1.348	NA	NA	NA	NA	NA	NA	NA
SPAC2C4.16c	1.723	1.987	1.733	1.68	1.929	1.993	1.525	2.305	1.747	NA	NA	NA	NA	NA	NA	NA
SPAC1039.08	1.722	1.279	1.548	1.214	1.366	1.24	1.286	1.147	1.217	NA	NA	NA	NA	NA	NA	NA
SPAC4G9.16c	1.719	1.68	1.63	1.302	1.518	1.645	1.297	1.707	1.704	NA	NA	NA	NA	NA	NA	1
SPAC1071.07c	1.718	1.576	1.396	1.205	1.465	1.389	1.432	1.992	1.389	NA	NA	NA	NA	NA	NA	1
SPBC25H2.15	1.699	1.437	1.348	1.261	1.37	1.496	1.319	2.295	1.825	NA	NA	NA	NA	NA	NA	NA
SPBC776.04	1.695	1.832	1.239	1.077	1.497	1.232	1.038	1.631	1.021	NA	NA	NA	NA	NA	NA	NA
SPAC22E12.18	1.694	1.416	2.004	1.603	1.504	1.948	1.665	1.241	1.418	NA	NA	NA	NA	NA	NA	NA
SPBC21D10.10	1.694	1.584	1.121	1.198	1.463	1.141	1.054	1.329	1.097	NA	NA	NA	NA	NA	NA	NA
SPBC16H5.03c	1.691	1.528	1.229	1.213	1.327	1.135	1.056	2.194	2.388	NA	NA	NA	NA	NA	NA	NA
SPBC685.04c	1.679	1.395	1.837	1.445	1.238	1.709	1.527	0.998	0.909	NA	NA	NA	NA	NA	NA	NA
SPCC1020.11c	1.678	1.232	1.281	0.939	1.256	0.9	1.503	0.982	0.806	NA	NA	NA	NA	NA	NA	NA
SPCP1E11.10	1.676	1.355	1.78	1.286	1.356	1.446	1.73	1.928	1.639	NA	NA	NA	NA	NA	NA	NA
SPBC685.06	1.667	1.433	1.383	1.009	1.354	1.351	1.408	1.482	1.296	NA	NA	NA	NA	NA	NA	NA
SPCC594.05c	1.649	1.449	1.136	0.999	1.45	1.057	1.02	1.396	1.105	NA	NA	NA	NA	NA	NA	NA
SPBC21C3.20c	1.647	1.327	1.602	1.216	1.133	1.197	1.512	1.106	1.734	NA	NA	NA	NA	NA	NA	NA
SPAC3A11.07	1.643	1.443	1.141	1.048	0.964	0.885	1.097	1.103	0.991	NA	NA	NA	NA	NA	NA	NA
SPAC1296.03c	1.639	1.804	1.216	1.704	1.649	1.263	1.187	1.134	1.151	NA	NA	NA	NA	NA	NA	NA
SPAC140.02	1.625	1.614	2.026	1.916	1.904	2.351	1.734	1.602	1.507	NA	NA	NA	NA	NA	NA	1
SPAC17A5.07c	1.625	1.289	1.825	1.54	1.373	1.832	1.381	1.3	1.146	NA	NA	NA	NA	NA	NA	NA
SPCC736.09c	1.616	1.356	1.863	1.438	1.406	1.662	1.522	0.98	0.784	NA	NA	NA	NA	NA	NA	NA
SPCC24B10.09	1.594	1.417	1.446	1.274	1.392	1.36	1.444	1.227	1.379	NA	NA	NA	NA	NA	NA	NA
SPCC1223.05c	1.593	1.102	1.829	0.878	1.215	1.482	1.596	1.905	1.488	NA	NA	NA	NA	NA	NA	1
SPAC17H9.13c	1.587	1.306	1.357	1.052	1.388	1.265	1.169	1.478	1.731	NA	NA	NA	NA	NA	NA	1
SPBC1703.03c	1.581	1.495	1.596	1.266	1.458	1.363	1.475	1.389	1.477	NA	NA	NA	NA	NA	NA	NA
SPCC306.11	1.579	1.378	1.745	1.684	1.133	1.727	1.373	1.089	1.007	NA	NA	NA	NA	NA	NA	NA
SPAC1006.09	1.57	1.488	1.285	1.178	1.386	1.092	1.05	1.056	1.133	NA	NA	NA	NA	NA	NA	NA
SPAC767.01c	1.569	1.18	1.525	1.076	1.048	1.123	1.355	1.136	1.504	NA	NA	NA	NA	NA	NA	NA
SPBC29A3.02c	1.569	1.272	0.914	0.986	1.27	1.215	0.97	0.968	0.948	NA	NA	NA	NA	NA	NA	NA
SPAC2F7.08c	1.564	1.692	1.309	1.201	1.281	0.811	1.031	1.458	1.55	NA	NA	NA	NA	NA	NA	NA
SPAC328.10c	1.56	1.537	1.14	0.905	1.462	1.314	1.221	1.355	1.316	NA	NA	NA	NA	NA	NA	1
SPAC1834.10c	1.554	1.145	2.004	1.931	0.646	1.02	2.157	0.946	1.007	NA	NA	NA	NA	NA	NA	NA
SPAC8E11.02c	1.553	1.238	1.434	1.688	1.226	0.953	1.098	1.282	1.783	NA	NA	NA	NA	NA	NA	NA
SPCC24B10.11c	1.549	1.341	1.829	1.538	1.473	1.702	1.362	1.241	1.67	NA	NA	NA	NA	NA	NA	NA
SPBC16A3.19	1.532	1.762	1.052	1.254	1.627	1.071	1.065	1.14	1.043	NA	NA	NA	NA	NA	NA	NA
SPAC20G4.07c	1.505	1.191	1.408	1.288	1.007	0.996	0.911	2.319	1.126	NA	NA	NA	NA	NA	NA	NA
SPAC3C7.08c	1.502	1.397	1.108	0.937	1.23	0.877	1.011	1.506	1.133	NA	NA	NA	NA	NA	NA	NA
SPAC2G11.04	1.492	1.266	1.22	1.303	1.382	1.12	1.056	1.181	1.099	NA	NA	NA	NA	NA	NA	NA
SPCC1494.03	1.492	1.212	1.217	1.144	1.098	0.607	1.172	0.982	0.964	NA	NA	NA	NA	NA	NA	NA
SPAC22F8.12c	1.488	1.56	1.602	1.261	1.288	1.044	1.155	1.318	1.89	NA	NA	NA	NA	NA	NA	NA
SPAC22A12.04c	1.487	1.359	1.502	1.119	1.451	1.314	1.515	1.385	1.393	NA	NA	NA	NA	NA	NA	NA
SPBC839.13c	1.481	1.368	1.388	1.233	1.416	1.409	1.087	1.067	1.191	NA	NA	NA	NA	NA	NA	NA
SPBP4H10.17c	1.475	1.432	1.141	1.153	1.539	1.311	0.949	0.477	0.591	NA	NA	NA	NA	NA	NA	NA
SPAC4F10.13c	1.46	1.41	1.083	1.029	1.448	1.022	1	1.377	1.12	NA	NA	NA	NA	NA	NA	NA
SPCC11E10.06c	1.456	1.304	1.251	1.102	1.221	1.318	0.981	1.455	1.087	NA	NA	NA	NA	NA	NA	NA
SPAC23H3.05c	1.455	1.388	1.117	1.046	1.295	0.927	0.964	1.161	1.114	NA	NA	NA	NA	NA	NA	NA
SPAC30C2.04	1.454	1.525	1.335	1.332	1.408	1.373	1.415	1.553	1.584	NA	NA	NA	NA	NA	NA	1
SPBC16A3.13	1.454	1.341	1.527	1.098	1.12	0.93	1.368	0.981	0.821	NA	NA	NA	NA	NA	NA	NA
SPAC9G1.07	1.448	1.253	0.923	0.937	1.149	0.967	1.024	1.169	1.037	NA	NA	NA	NA	NA	NA	NA
SPAC5D6.13	1.445	1.399	1.162	1.04	1.439	1.131	1.244	1.155	0.998	NA	NA	NA	NA	NA	NA	NA
SPCC737.06c	1.442	1.323	1.267	0.681	1.256	0.833	1.109	1.205	0.887	NA	NA	NA	NA	NA	NA	NA
SPCC1223.11	1.441	1.352	1.027	0.822	1.188	0.804	1.113	0.971	0.76	NA	NA	NA	NA	NA	NA	NA
SPAC19B12.04	1.434	1.216	0.991	0.826	1.238	1.093	1.215	1.077	0.974	NA	NA	NA	NA	NA	NA	NA
SPBC1604.12	1.432	1.371	1.358	1.244	1.351	1.393	1.212	1.407	1.686	NA	NA	NA	NA	NA	NA	NA
SPAC2C4.05	1.429	1.359	1.329	1.232	1.402	1.259	1.135	1.133	1.029	NA	NA	NA	NA	NA	NA	NA
SPCC70.10	1.42	1.412	1.434	1.157	1.202	1.019	1.446	0.911	0.888	NA	NA	NA	NA	NA	NA	NA
SPAPB1E7.02c	1.419	1.211	1.657	1.375	1.183	1.255	1.29	1.56	2.391	NA	NA	NA	NA	NA	NA	NA
SPAC4F10.18	1.412	1.423	1.094	1.217	1.5	1.208	0.977	1.245	1.165	NA	NA	NA	NA	NA	NA	NA
SPAC824.04	1.411	1.269	1.185	1.652	1.297	1.295	1.092	1.137	1.225	NA	NA	NA	NA	NA	NA	NA
SPAC1002.18	1.41	1.42	0.948	1.079	1.361	1.117	1.05	1.007	0.887	NA	NA	NA	NA	NA	NA	NA
SPAC29A4.14c	1.406	1.355	0.93	0.967	1.342	0.991	0.98	1.11	1.03	NA	NA	NA	NA	NA	NA	NA
SPAC8E11.05c	1.406	1.328	1.066	1.042	1.075	0.937	0.947	1.352	1.32	NA	NA	NA	NA	NA	NA	NA
SPCC1795.10c	1.404	1.223	0.954	0.901	1.237	0.828	0.945	1.11	0.865	NA	NA	NA	NA	NA	NA	NA
SPCC188.09c	1.399	1.402	1.142	1.038	1.351	1.329	1.121	0.766	1.052	NA	NA	NA	NA	NA	NA	NA
SPAC3A11.13	1.395	1.146	1.586	1.208	1.184	1.17	1.232	0.962	0.986	NA	NA	NA	NA	NA	NA	NA
SPAC23H3.13c	1.391	1.166	1.469	1.176	0.949	1.087	1.348	1.068	1.376	NA	NA	NA	NA	NA	NA	NA
SPCC962.04	1.39	1.202	1.196	1.085	1.174	1.216	1.298	1.329	0.819	NA	NA	NA	NA	NA	NA	NA
SPAC22G7.06c	1.388	1.299	1.163	1.036	1.253	1.042	0.917	0.997	1.33	NA	NA	NA	NA	NA	NA	NA
SPBC887.15c	1.387	1.467	1.636	1.327	1.498	1.631	1.153	1.644	2.001	NA	NA	NA	NA	NA	NA	NA
SPCC553.03	1.387	1.393	0.987	1.079	1.358	1.09	1.018	1.25	0.879	NA	NA	NA	NA	NA	NA	NA
SPBC25B2.07c	1.385	1.172	1.082	1.02	1.17	0.967	1.019	1.053	0.861	NA	NA	NA	NA	NA	NA	NA
SPBP35G2.07	1.384	1.19	1.203	1.059	1.066	1.023	1.472	1.268	1.19	NA	NA	NA	NA	NA	NA	NA
SPBC609.05	1.382	1.467	1.411	0.992	1.113	0.747	1.112	1.18	1.388	NA	NA	NA	NA	NA	NA	NA
SPBC2G2.06c	1.381	1.384	1.273	0.998	1.211	1.089	0.947	1.007	0.964	NA	NA	NA	NA	NA	NA	NA
SPBC3H7.10	1.381	1.28	1.23	1.139	1.288	1.288	0.858	1.245	1.296	NA	NA	NA	NA	NA	NA	NA
SPAC1F5.05c	1.377	1.072	1.395	1.232	0.819	1.1	1.271	1.321	1.633	NA	NA	NA	NA	NA	NA	NA
SPAC1071.04c	1.376	1.522	1.409	1.338	1.471	1.412	1.544	1.136	1.136	NA	NA	NA	NA	NA	NA	NA
SPAC56F8.14c	1.376	1.18	0.882	1.268	1.256	1.283	1.009	0.77	1.125	NA	NA	NA	NA	NA	NA	NA
SPBC29A3.08	1.373	1.155	1.019	1.057	1.245	1.109	1.017	1.066	1.019	NA	NA	NA	NA	NA	NA	NA
SPAC5D6.09c	1.369	1.152	1.249	1.055	1.16	1.063	1.025	1.291	1.227	NA	NA	NA	NA	NA	NA	NA
SPCC126.03	1.368	1.245	1.383	1.101	1.267	1.206	1.047	1.326	1.417	NA	NA	NA	NA	NA	NA	1
SPAC1486.04c	1.368	1.123	1.251	1.35	1.262	1.298	1.093	1.274	1.517	NA	NA	NA	NA	NA	NA	NA
SPAC23C11.14	1.366	1.259	0.931	0.836	1.39	0.72	0.89	1.136	1.198	NA	NA	NA	NA	NA	NA	NA
SPBC354.10	1.366	1.344	0.736	0.675	1.195	0.575	0.662	1.064	0.591	NA	1	NA	NA	1	NA	NA
SPBC29A3.05	1.365	1.224	1.2	1.536	1.297	1.042	1.006	1.158	1.325	NA	NA	NA	NA	NA	NA	NA
SPAC17A5.16	1.358	1.286	0.991	0.984	1.298	0.905	0.94	1.303	0.802	NA	NA	NA	NA	NA	NA	NA
SPAC4D7.06c	1.358	1.447	0.698	0.885	1.395	0.757	0.897	1.509	1.076	NA	NA	NA	NA	NA	NA	NA
SPCC24B10.10c	1.352	1.157	1.273	1.212	1.268	1.206	1.193	0.734	0.905	NA	NA	NA	NA	NA	NA	NA
SPBC13E7.06	1.35	1.154	1.314	1.095	1.208	0.845	1.145	1.007	1.075	NA	NA	NA	NA	NA	NA	NA
SPBC16E9.09c	1.349	1.408	1.937	1.278	1.448	1.457	1.469	1.643	1.819	NA	NA	NA	NA	NA	NA	NA
SPCC1223.10c	1.339	1.15	1.106	0.968	1.159	1.036	1.063	1.063	1.03	NA	NA	NA	NA	NA	NA	NA
SPBC26H8.09c	1.338	1.235	1.081	1.118	1.247	0.776	0.857	1.059	1.085	NA	NA	NA	NA	NA	NA	NA
SPBC1A4.04	1.337	1.254	1.013	0.997	1.073	1.022	0.986	1.101	0.913	NA	NA	NA	NA	NA	NA	NA
SPAC343.11c	1.335	1.36	1.14	1.246	1.377	1.203	1.137	1.403	1.46	NA	NA	NA	NA	NA	NA	NA
SPBC1703.08c	1.335	1.303	1.198	1.125	1.292	1.185	0.973	0.995	0.907	NA	NA	NA	NA	NA	NA	NA
SPCC24B10.12	1.335	1.301	0.795	0.725	1.044	0.507	0.978	0.966	0.967	NA	NA	NA	NA	NA	NA	NA
SPCC364.03	1.335	1.151	1.571	1.103	1.082	1.268	1.422	1.509	1.793	NA	NA	NA	NA	NA	NA	NA
SPBC215.03c	1.333	1.223	1.085	0.971	1.042	0.96	1.037	1.107	1.059	NA	NA	NA	NA	NA	NA	NA
SPAC9.02c	1.332	1.166	1.397	1.129	1.282	1.229	1.012	1.539	0.974	NA	NA	NA	NA	NA	NA	NA
SPACUNK4.16c	1.331	1.362	1.041	1.14	1.381	1.124	0.993	1.312	1.004	NA	NA	NA	NA	NA	NA	NA
SPCC16C4.10	1.33	1.44	0.767	0.717	1.335	0.653	0.89	1.45	1.111	NA	NA	NA	NA	NA	NA	NA
SPBC18H10.06c	1.326	1.348	1.049	1.058	1.339	1.085	0.962	0.861	0.586	NA	NA	NA	NA	NA	NA	NA
SPAC3H5.10	1.325	1.424	0.708	0.865	1.285	0.812	0.848	1.293	0.982	NA	NA	NA	NA	NA	NA	NA
SPAC12G12.09	1.323	1.249	0.839	1.249	1.116	1.252	0.856	0.783	1.164	NA	NA	NA	NA	NA	NA	NA
SPAC15A10.15	1.323	1.25	0.92	0.92	1.2	0.853	0.96	0.367	0.417	NA	1	NA	NA	1	NA	NA
SPAC1952.02	1.322	1.408	1.24	1.005	1.159	1.07	1.344	1.203	1.221	NA	NA	NA	NA	NA	NA	1
SPBC3H7.14	1.322	1.189	1.24	1.048	0.782	0.719	1.214	1.502	1.616	NA	NA	NA	NA	NA	NA	NA
SPBC1703.12	1.32	1.115	1.067	0.985	1.175	0.911	0.942	0.788	0.739	NA	NA	NA	NA	NA	NA	NA
SPCC1259.08	1.32	1.304	0.848	0.975	1.274	1.046	1.001	0.968	1.481	NA	NA	NA	NA	NA	NA	NA
SPCC1281.08	1.317	1.288	1.182	1.133	1.348	1.266	0.903	1.368	1.297	NA	NA	NA	NA	NA	NA	NA
SPBC1711.04	1.316	1.247	1.303	1.146	1.291	1.279	1.318	1.101	0.999	NA	NA	NA	NA	NA	NA	NA
SPCC1919.09	1.312	1.216	1.151	1.012	1.237	1.152	0.939	1.243	1.176	NA	NA	NA	NA	NA	NA	NA
SPAC17C9.14	1.309	1.36	1.092	0.991	1.233	0.982	1.085	1.156	0.936	NA	NA	NA	NA	NA	NA	NA
SPBC4B4.12c	1.308	0.964	1.068	1.024	0.939	1.033	1.003	1.01	0.8	NA	NA	NA	NA	NA	NA	NA
SPBC14F5.03c	1.307	1.147	1.501	1.156	1.089	1.488	1.445	1.077	1.064	NA	NA	NA	NA	NA	NA	NA
SPCC1235.15	1.303	1.166	1.179	0.942	1.149	0.925	1.069	1.245	1.679	NA	NA	NA	NA	NA	NA	NA
SPBC216.05	1.302	1.169	1.289	1.275	1.219	1.267	1.179	1.072	1.259	NA	NA	NA	NA	NA	NA	NA
SPBC1685.01	1.3	1.309	1.099	1.101	1.35	1.096	1.047	1.104	1.027	NA	NA	NA	NA	NA	NA	NA
SPBC6B1.03c	1.3	1.308	1.587	1.099	1.26	1.226	1.487	0.909	0.844	NA	NA	NA	NA	NA	NA	NA
SPCC306.04c	1.299	1.538	1.085	1.212	1.655	1.222	0.989	1.268	0.941	NA	NA	NA	NA	NA	NA	1
SPBC577.14c	1.299	1.216	1.093	1.1	1.281	1.184	1.042	1.076	1.056	NA	NA	NA	NA	NA	NA	NA
SPAC22F8.03c	1.298	1.161	1.61	1.202	1.207	1.257	1.301	1.074	1.564	NA	NA	NA	NA	NA	NA	NA
SPAC2G11.10c	1.297	1.198	1.065	0.973	1.281	1.128	0.918	1.247	1.082	NA	NA	NA	NA	NA	NA	NA
SPBC16E9.02c	1.295	1.002	0.941	0.947	1.087	0.883	0.995	0.991	1.16	NA	NA	NA	NA	NA	NA	NA
SPBPB2B2.11	1.295	1.213	0.961	0.874	1.238	1.034	0.973	1.154	0.95	NA	NA	NA	NA	NA	NA	NA
SPAC323.05c	1.294	1.274	0.994	1.064	1.003	0.914	0.818	1.108	1.169	NA	NA	NA	NA	NA	NA	NA
SPBC16C6.09	1.294	1.285	1.068	0.785	1.133	0.822	0.856	0.97	0.897	NA	NA	NA	NA	NA	NA	NA
SPBC21D10.11c	1.294	1.357	1.19	1.132	1.386	1.08	1.316	1.289	1.069	NA	NA	NA	NA	NA	NA	NA
SPBC16G5.13	1.29	1.128	1.037	1.19	1.183	0.828	0.872	0.769	0.985	NA	NA	NA	NA	NA	NA	NA
SPBC29A10.02	1.289	1.157	0.973	0.894	1.095	1.025	0.96	1.354	0.987	NA	NA	NA	NA	NA	NA	1
SPBPJ4664.06	1.289	1.14	1.297	1.253	1.246	1.035	1.015	1.09	1.342	NA	NA	NA	NA	NA	NA	NA
SPCC777.13	1.289	0.918	1.073	0.885	0.857	0.913	1.41	1.226	1.525	NA	NA	NA	NA	NA	NA	NA
SPCC23B6.05c	1.287	1.074	0.965	1.106	1.063	1.117	0.922	0.97	0.891	NA	NA	NA	NA	NA	NA	NA
SPAC110.02	1.286	1.228	1.217	1.101	1.257	0.962	1.051	1.105	1.042	NA	NA	NA	NA	NA	NA	NA
SPAC4F10.08	1.286	1.436	0.983	1.193	1.425	1.187	1.211	1.247	0.808	NA	NA	NA	NA	NA	NA	NA
SPAC630.14c	1.285	1.239	1.15	0.866	1.089	0.827	1.174	0.946	1.033	NA	NA	NA	NA	NA	NA	NA
SPBC839.05c	1.284	1.396	1.547	1.261	1.374	1.211	1.222	1.498	1.574	NA	NA	NA	NA	NA	NA	NA
SPAC4A8.10	1.282	1.182	1.046	0.922	1.082	0.806	0.977	1.189	0.859	NA	NA	NA	NA	NA	NA	NA
SPCC74.06	1.278	1.2	1.338	1.123	1.092	1.022	1.255	1.049	1.191	NA	NA	NA	NA	NA	NA	NA
SPBP4H10.16c	1.277	1.098	1.059	1.191	1.2	1.108	1.01	1.08	0.881	NA	NA	NA	NA	NA	NA	NA
SPBC30B4.04c	1.275	1.231	0.807	0.907	1.194	1.039	0.932	1.278	1.225	NA	NA	NA	NA	NA	NA	NA
SPBC1539.10	1.274	1.231	1.365	1.202	1.228	1.226	1.295	1.353	1.217	NA	NA	NA	NA	NA	NA	NA
SPBC32H8.07	1.274	1.099	1.408	1.146	1.014	1.109	1.233	0.968	1.416	NA	NA	NA	NA	NA	NA	NA
SPBC12C2.07c	1.273	1.191	0.911	0.846	1.029	0.871	0.933	1.153	0.815	NA	NA	NA	NA	NA	NA	NA
SPBC3H7.09	1.273	1.241	0.992	0.96	1.13	0.932	0.945	1.189	1.26	NA	NA	NA	NA	NA	NA	NA
SPCC965.13	1.273	1.126	1.02	1.146	1.167	1.179	0.946	1.107	1.182	NA	NA	NA	NA	NA	NA	NA
SPCC1393.05	1.272	1.239	1.234	1.182	1.348	1.253	1.112	1.271	1.41	NA	NA	NA	NA	NA	NA	NA
SPCC1753.02c	1.272	1.195	1.263	1.287	1.09	1.217	1.141	0.883	1.31	NA	NA	NA	NA	NA	NA	NA
SPCC794.11c	1.271	1.249	0.964	1.17	1.19	0.99	0.977	1.265	1.167	NA	NA	NA	NA	NA	NA	NA
SPCC417.02	1.27	1.2	1.182	1.379	1.315	1.346	1.067	1.098	1.212	NA	NA	NA	NA	NA	NA	NA
SPAC6F12.10c	1.268	1.259	1.119	0.953	1.128	1.212	1.391	0.854	0.732	NA	NA	NA	NA	NA	NA	NA
SPAC664.07c	1.266	1.095	1.26	1.14	1.067	0.978	1.214	0.974	1.065	NA	NA	NA	NA	NA	NA	NA
SPAC57A10.14	1.265	1.117	1.269	1.309	1.186	1.317	1.254	0.838	1.233	NA	NA	NA	NA	NA	NA	NA
SPAC1486.01	1.264	1.168	1.065	1.144	1.165	1.286	1.228	0.407	0.807	NA	1	NA	NA	1	NA	NA
SPCC338.16	1.264	1.112	1.486	1.117	1.219	1.016	1.471	1.46	1.369	NA	NA	NA	NA	NA	NA	NA
SPCC1919.01	1.263	1.149	1.077	1.122	1.162	1.111	1.076	0.989	0.979	NA	NA	NA	NA	NA	NA	NA
SPAC22H10.04	1.262	1.189	1.144	1.196	1.252	1.166	1.118	1.14	1.178	NA	NA	NA	NA	NA	NA	NA
SPBP4H10.18c	1.262	1.168	1.152	0.999	1.175	1.156	0.925	0.927	0.798	NA	NA	NA	NA	NA	NA	NA
SPAC11D3.03c	1.26	1.371	0.492	0.521	1.3	0.61	0.686	0.771	0.973	NA	1	NA	1	NA	NA	NA
SPAC23C11.02c	1.259	1.199	1.097	1.264	1.013	1.267	1.1	1.206	1.236	NA	NA	NA	NA	NA	NA	NA
SPAC22F8.02c	1.256	0.936	1.266	1.302	0.989	1.302	1.166	0.838	1.077	NA	NA	NA	NA	NA	NA	NA
SPBC26H8.05c	1.256	0.989	1.038	0.965	1.079	0.941	0.979	0.976	0.991	NA	NA	NA	NA	NA	NA	NA
SPAC977.17	1.255	1.275	1.093	1.012	1.22	1.011	1.026	1.065	1.213	NA	NA	NA	NA	NA	NA	NA
SPBC27.08c	1.255	1.251	0.697	0.657	1.185	0.603	0.754	1.214	0.872	NA	NA	NA	NA	NA	NA	NA
SPBC3B8.10c	1.255	1.185	1.069	1.138	1.303	1.213	1.037	1.275	1.116	NA	NA	NA	NA	NA	NA	NA
SPBC725.07	1.255	1.179	1.153	0.91	1.144	1.223	1.19	1.023	0.853	NA	NA	NA	NA	NA	NA	NA
SPCC550.11	1.255	1.045	0.959	1.04	1.108	0.924	0.954	1.205	1.21	NA	NA	NA	NA	NA	NA	NA
SPAC144.02	1.253	1.085	1.089	1.022	1.013	1.061	0.987	1.267	1.168	NA	NA	NA	NA	NA	NA	NA
SPBC409.16c	1.253	1.05	1.19	0.986	1.102	1.336	1.089	0.957	0.915	NA	NA	NA	NA	NA	NA	NA
SPAC13A11.04c	1.252	1.144	1.294	0.986	1.004	0.896	1.433	1.02	1.055	NA	NA	NA	NA	NA	NA	NA
SPAC19G12.08	1.252	1.356	1.314	1.508	1.508	1.282	1.15	1.393	1.276	NA	NA	NA	NA	NA	NA	NA
SPAC27E2.07	1.252	0.911	1.162	1.062	1.008	1	1.18	0.921	1.006	NA	NA	NA	NA	NA	NA	NA
SPBC2D10.12	1.252	1.345	1.466	1.16	1.182	1.191	1.079	0.298	1.615	NA	NA	NA	NA	NA	NA	NA
SPAC30D11.13	1.25	1.14	0.993	1.045	1.104	1.021	1.044	1.624	1.652	NA	NA	NA	NA	NA	NA	NA
SPCC18.09c	1.249	1.114	0.922	0.934	1.138	0.916	0.898	1.013	0.837	NA	NA	NA	NA	NA	NA	NA
SPBPB2B2.12c	1.248	1.097	1.046	1.019	1.117	1.127	1.032	1.062	0.98	NA	NA	NA	NA	NA	NA	NA
SPAC31G5.19	1.246	1.303	0.924	1.041	0.989	0.737	0.805	1.142	0.994	NA	NA	NA	NA	NA	NA	NA
SPBC2A9.07c	1.243	1.171	1.172	1.223	1.205	1.345	1.006	1.105	0.979	NA	NA	NA	NA	NA	NA	NA
SPAC1783.02c	1.242	1.18	1.573	1.26	1.198	1.354	1.303	1.073	1.557	NA	NA	NA	NA	NA	NA	NA
SPAC227.06	1.241	1.151	1.012	1.026	1.178	1.09	1.049	1.052	1.055	NA	NA	NA	NA	NA	NA	NA
SPBC21C3.01c	1.241	1.158	1.094	1.084	1.194	1.178	1.069	1.127	1.359	NA	NA	NA	NA	NA	NA	NA
SPBC19C2.13c	1.24	1.2	1.062	1.075	1.244	1.13	0.856	1.502	1.284	NA	NA	NA	NA	NA	NA	1
SPBC4B4.07c	1.24	1.011	1.055	1.162	1.101	1.151	1.105	1.176	1.081	NA	NA	NA	NA	NA	NA	1
SPBC1105.08	1.24	1.344	1.15	1.148	1.424	1.196	0.991	1.476	1.252	NA	NA	NA	NA	NA	NA	NA
SPCC4G3.15c	1.239	0.969	1.269	1.139	0.845	0.79	1.055	1.153	0.775	NA	NA	NA	NA	NA	NA	NA
SPAC6B12.15	1.238	1.245	1.284	1.062	1.058	1.137	1.14	1.141	0.977	NA	NA	NA	NA	NA	NA	NA
SPAC1952.17c	1.236	1.158	1.176	1.016	0.963	0.755	1.265	1.083	1.532	NA	NA	NA	NA	NA	NA	NA
SPAC1071.09c	1.234	1.099	1.108	1.06	1.104	1.038	1.008	1.061	1.316	NA	NA	NA	NA	NA	NA	NA
SPAC824.08	1.234	1.07	1.068	1.215	1.086	1.22	1.026	1.075	1.109	NA	NA	NA	NA	NA	NA	NA
SPBC18E5.08	1.234	1.015	1.049	0.763	0.859	1.013	0.962	1.041	0.996	NA	NA	NA	NA	NA	NA	NA
SPCC16C4.04	1.234	1.338	0.853	0.848	1.193	0.831	0.951	1.165	0.947	NA	NA	NA	NA	NA	NA	NA
SPCC11E10.08	1.233	1.057	1.069	1.04	1.206	1.089	1.023	1.34	1.224	NA	NA	NA	NA	NA	NA	NA
SPBC1D7.03	1.232	0.981	1.087	0.963	0.977	1.215	0.985	1.364	1.769	NA	NA	NA	NA	NA	NA	NA
SPAC14C4.14	1.231	1.353	1.179	0.919	1.301	1.161	1.141	0.951	0.906	NA	NA	NA	NA	NA	NA	NA
SPCC1223.02	1.231	1.181	1.029	0.929	1.127	1.192	1.001	0.98	0.936	NA	NA	NA	NA	NA	NA	NA
SPAC823.14	1.229	1.075	1.039	1.043	1.12	0.932	0.981	1.056	0.959	NA	NA	NA	NA	NA	NA	NA
SPAC890.05	1.228	1.18	1.229	1.095	1.169	1.071	1.204	0.989	1.373	NA	NA	NA	NA	NA	NA	1
SPBC1E8.02	1.228	1.1	1.099	0.974	1.007	0.943	1.041	0.627	0.583	NA	1	NA	1	NA	NA	NA
SPBC23G7.16	1.228	1.095	0.976	0.964	1.033	0.833	0.956	1.097	0.978	NA	NA	NA	NA	NA	NA	NA
SPCC1393.02c	1.228	1.173	1.15	1.016	1.166	0.989	1.027	0.878	0.898	NA	NA	NA	NA	NA	NA	NA
SPAC13G6.06c	1.227	1.344	0.643	0.583	1.162	0.528	0.891	1.128	1.024	NA	NA	NA	NA	NA	NA	NA
SPAC30D11.10	1.227	1.221	1.234	1.168	1.234	1.062	1.236	1.607	1.738	NA	NA	NA	NA	NA	NA	NA
SPCC584.16c	1.227	1.312	1.019	0.965	1.171	0.999	1.148	0.964	0.923	NA	NA	NA	NA	NA	NA	NA
SPAC11E3.01c	1.226	1.211	1.067	1.065	1.204	1.087	1.019	1.141	1.017	NA	NA	NA	NA	NA	NA	NA
SPAC227.15	1.226	1.399	1.023	0.979	1.286	0.944	1.068	0.999	1.001	NA	NA	NA	NA	NA	NA	NA
SPAC17C9.07	1.224	1.147	1.25	1.252	1.109	1.156	1.161	1.123	1.389	NA	NA	NA	NA	NA	NA	NA
SPBC17D1.05	1.224	1.262	1.131	1.095	1.031	0.846	1.058	1.205	0.775	NA	NA	NA	NA	NA	NA	NA
SPCC1223.06	1.224	1.125	1.226	0.995	1.191	1.231	1.235	1.157	1.277	NA	NA	NA	NA	NA	NA	NA
SPAC31A2.15c	1.221	1.046	1.118	1.02	1.041	0.884	1.172	0.98	1.082	NA	NA	NA	NA	NA	NA	NA
SPCC1672.06c	1.221	1.013	1.019	1.009	0.998	0.958	0.991	0.933	1.013	NA	NA	NA	NA	NA	NA	NA
SPCC16A11.16c	1.22	1.021	1.039	0.965	1.031	0.954	0.966	1.034	0.889	NA	NA	NA	NA	NA	NA	NA
SPAC9.05	1.218	1.068	0.991	1.083	1.122	1.122	0.986	0.974	1.062	NA	NA	NA	NA	NA	NA	NA
SPBC902.03	1.216	1.043	1.111	1.025	1.053	1.114	1.091	1.205	1.225	NA	NA	NA	NA	NA	NA	NA
SPBC11B10.10c	1.215	1.386	1.329	1.272	1.359	1.254	1.109	1.173	1.214	NA	NA	NA	NA	NA	NA	NA
SPAC6B12.07c	1.213	1.194	0.994	1.056	1.142	0.769	0.936	0.893	1.016	NA	NA	NA	NA	NA	NA	NA
SPBC12C2.03c	1.213	1.104	1.054	1.038	1.038	0.896	0.888	1.078	1.208	NA	NA	NA	NA	NA	NA	NA
SPCC777.10c	1.213	1.232	1.509	1.388	1.295	1.446	1.249	0.334	1.29	NA	NA	NA	NA	NA	NA	NA
SPAC1B2.04	1.212	1.108	1.273	0.896	1.065	1.208	1.218	1.197	1.127	NA	NA	NA	NA	NA	NA	NA
SPAC24B11.12c	1.212	1.09	1.218	1.485	1.232	1.106	0.964	1.306	1.292	NA	NA	NA	NA	NA	NA	NA
SPBC23G7.04c	1.212	1.079	1.119	1.005	1.102	1.048	1.014	0.988	0.979	NA	NA	NA	NA	NA	NA	NA
SPBC19C7.02	1.211	1.124	1.072	1.073	1.125	0.962	1.075	0.776	0.834	NA	NA	NA	NA	NA	NA	NA
SPCC794.07	1.211	1.098	1.105	0.998	1.07	0.952	1	1.091	1.158	NA	NA	NA	NA	NA	NA	NA
SPAC4G8.03c	1.208	1.148	1.267	1.046	1.175	0.977	0.95	1.053	1.113	NA	NA	NA	NA	NA	NA	1
SPBC31E1.02c	1.208	1.095	1.274	1.248	1.154	1.047	1.036	0.989	1.315	NA	NA	NA	NA	NA	NA	NA
SPBC24C6.05	1.207	1.152	0.997	0.967	1.098	0.908	0.965	1.156	1.015	NA	NA	NA	NA	NA	NA	NA
SPBC1711.08	1.206	1.23	1.198	1.113	1.141	1.093	1.048	1.081	1.333	NA	NA	NA	NA	NA	NA	NA
SPCC18B5.10c	1.206	1.145	0.956	0.867	1.094	0.785	0.89	1.071	1.034	NA	NA	NA	NA	NA	NA	NA
SPAC29A4.18	1.205	1.148	0.804	1.011	1.223	0.967	0.899	0.3	0.333	NA	1	NA	1	NA	NA	NA
SPBC1539.03c	1.205	1.018	0.994	1.148	0.958	1.126	1.061	0.872	0.815	NA	NA	NA	NA	NA	NA	NA
SPAC2C4.10c	1.204	1.233	1.008	0.946	1.222	0.997	1.019	1.19	1.107	NA	NA	NA	NA	NA	NA	NA
SPAC1805.03c	1.203	1.076	1.105	1.198	1.091	1.306	1.02	1.103	0.925	NA	NA	NA	NA	NA	NA	NA
SPAC1A6.07	1.202	1.087	1.048	1.064	1.135	1.18	1.071	1.184	1.172	NA	NA	NA	NA	NA	NA	NA
SPBC1685.02c	1.202	1.088	1.036	1.166	1.115	1.263	1.189	1.003	1.042	NA	NA	NA	NA	NA	NA	NA
SPBPB2B2.14c	1.202	1.022	1.395	1.212	0.99	1.515	1.394	0.995	1.61	NA	NA	NA	NA	NA	NA	NA
SPCC24B10.19c	1.202	1.136	1.162	1.025	1.241	1.083	1.004	0.986	1.581	NA	NA	NA	NA	NA	NA	NA
SPAC1093.02	1.201	1.149	0.905	0.934	0.86	0.726	0.838	1.049	1.012	NA	NA	NA	NA	NA	NA	NA
SPAC16E8.08	1.201	1.145	1.02	1.094	1.132	1.067	0.988	1.06	1.028	NA	NA	NA	NA	NA	NA	NA
SPAC589.09	1.201	1.183	1.079	1.148	1.196	1.092	1.062	1.07	0.907	NA	NA	NA	NA	NA	NA	NA
SPBC660.05	1.2	1.085	1.265	1.052	1.049	1.263	1.028	1.014	1.51	NA	NA	NA	NA	NA	NA	NA
SPAC664.04c	1.199	1.158	1.137	1.021	1.12	1.084	1.291	1.116	1.179	NA	NA	NA	NA	NA	NA	NA
SPAC23G3.10c	1.197	1.059	1.021	0.989	1.07	1.087	0.983	1.036	0.977	NA	NA	NA	NA	NA	NA	NA
SPCC622.12c	1.196	1.349	1.119	1.118	1.401	1.146	0.882	1.196	0.822	NA	NA	NA	NA	NA	NA	NA
SPBC215.07c	1.195	1.146	0.996	0.989	1.151	0.997	0.996	1.039	0.933	NA	NA	NA	NA	NA	NA	NA
SPAC24B11.06c	1.194	1.099	1.23	1.098	1.118	0.889	1.237	1.012	0.952	NA	NA	NA	NA	NA	NA	NA
SPBC2D10.16	1.194	1.11	1.357	1.383	1.016	1.332	1.25	1.004	1.284	NA	NA	NA	NA	NA	NA	NA
SPAC4F10.19c	1.193	1.217	1.343	1.505	1.316	1.675	1.246	1.277	1.501	NA	NA	NA	NA	NA	NA	NA
SPAC17A2.13c	1.192	1.353	1.063	1.154	1.412	1.136	0.863	1.106	1.12	NA	NA	NA	NA	NA	NA	NA
SPAC17C9.15c	1.192	1.124	1.265	1.052	1.199	1.043	0.987	1.204	1.278	NA	NA	NA	NA	NA	NA	NA
SPBC16H5.08c	1.192	1.082	1.366	1.326	0.953	1.321	1.245	1.219	1.522	NA	NA	NA	NA	NA	NA	NA
SPBC17A3.06	1.192	0.983	1.192	1.336	0.999	1.021	1.062	0.913	1.185	NA	NA	NA	NA	NA	NA	NA
SPBC6B1.08c	1.191	1.107	1.051	0.977	1.123	1.032	0.888	1.228	1.072	NA	NA	NA	NA	NA	NA	NA
SPAC13F5.04c	1.19	1.16	0.964	1.042	1.138	1.055	0.85	0.914	0.993	NA	NA	NA	NA	NA	NA	NA
SPAC1782.11	1.189	1.221	0.905	0.875	1.153	1.003	0.881	1.27	1.146	NA	NA	NA	NA	NA	NA	NA
SPAC9E9.08	1.189	1.231	1.293	1.224	1.268	1.227	1.246	1.107	1.004	NA	NA	NA	NA	NA	NA	NA
SPBC16A3.07c	1.189	1.082	0.939	0.879	1.045	0.898	0.869	1.273	0.921	NA	NA	NA	NA	NA	NA	NA
SPBC1773.01	1.189	1.392	1.086	1.022	1.234	1.064	1.049	1.163	1.179	NA	NA	NA	NA	NA	NA	NA
SPBC365.20c	1.189	1.157	1.398	1.09	1.161	0.979	1.218	0.816	0.792	NA	NA	NA	NA	NA	NA	NA
SPCC338.02	1.189	1.188	1.052	1.061	1.207	1.14	0.974	1.152	1.052	NA	NA	NA	NA	NA	NA	NA
SPAC24B11.10c	1.187	1.175	1.161	1.067	1.131	0.965	1.054	0.953	1.096	NA	NA	NA	NA	NA	NA	NA
SPAC3H1.04c	1.187	1.132	0.849	0.903	1.136	0.838	0.764	0.993	0.813	NA	NA	NA	NA	NA	NA	NA
SPCC1682.16	1.186	1.024	1.18	0.901	0.881	0.916	0.946	1.248	1.704	NA	NA	NA	NA	NA	NA	NA
SPAC31F12.01	1.185	0.526	1.745	1.374	0.419	0.842	1.099	0.739	1.656	NA	NA	NA	NA	NA	NA	NA
SPCC584.13	1.184	1.107	0.954	1.031	0.993	0.925	0.966	0.867	0.99	NA	NA	NA	NA	NA	NA	NA
SPCC61.05	1.184	1.165	1.078	0.994	1.047	1.078	0.991	1.06	1.044	NA	NA	NA	NA	NA	NA	NA
SPCC569.02c	1.183	1.169	1.121	1.046	1.194	1.055	0.968	0.925	0.929	NA	NA	NA	NA	NA	NA	NA
SPAC1071.05	1.182	1.127	1.199	1.03	1.143	0.88	0.9	1.132	1.054	NA	NA	NA	NA	NA	NA	NA
SPAC14C4.09	1.182	1.105	1.649	1.447	1.181	1.462	1.424	0.771	1.116	NA	NA	NA	NA	NA	NA	NA
SPAC6G9.15c	1.181	1.075	1.137	1.073	1.127	0.963	0.932	1.22	1.213	NA	NA	NA	NA	NA	NA	NA
SPBC649.03	1.179	1.09	1.113	1.043	1.152	1.031	1.155	1.262	1.29	NA	NA	NA	NA	NA	NA	NA
SPAC637.09	1.178	1.089	1.058	0.951	0.984	0.793	1.054	0.985	0.896	NA	NA	NA	NA	NA	NA	NA
SPAC3A12.13c	1.177	1.149	0.796	0.824	0.829	0.525	0.613	1.041	0.705	NA	1	NA	1	NA	NA	1
SPAC2C4.15c	1.176	1.151	0.979	0.754	1.113	0.718	1.187	1.176	0.761	NA	NA	NA	NA	NA	NA	NA
SPAC30D11.07	1.175	1.1	1.096	1.045	1.115	1.206	1.181	1.201	1.581	NA	NA	NA	NA	NA	NA	NA
SPBC36B7.03	1.175	1.351	1.068	1.192	1.39	1.114	1.193	1.173	0.88	NA	NA	NA	NA	NA	NA	NA
SPAC5H10.01	1.174	1.094	0.949	1.202	1.23	1.273	0.969	0.802	1.09	NA	NA	NA	NA	NA	NA	NA
SPBC11B10.02c	1.174	1.385	1.263	1.17	1.307	1.222	1.088	0.986	1.074	NA	NA	NA	NA	NA	NA	NA
SPCC663.04	1.174	1.065	1.11	0.949	0.988	0.991	0.919	1.792	2.245	NA	NA	NA	NA	NA	NA	NA
SPBC19C2.14	1.173	1.04	1.549	1.323	1.119	1.326	1.262	1.555	2.03	NA	NA	NA	NA	NA	NA	1
SPAC1805.14	1.173	1.162	1.4	1.106	1.206	1.116	1.213	1.163	1.175	NA	NA	NA	NA	NA	NA	NA
SPAC227.01c	1.173	1.1	1.276	1.327	0.895	0.936	0.943	1.212	1.521	NA	NA	NA	NA	NA	NA	NA
SPAC637.03	1.173	1.129	1.145	1.06	1.105	0.98	1.156	1.004	0.902	NA	NA	NA	NA	NA	NA	NA
SPBC6B1.05c	1.173	0.84	0.963	0.95	0.817	0.81	0.936	0.955	1.005	NA	NA	NA	NA	NA	NA	NA
SPBP8B7.06	1.173	1.064	1.037	1.115	1.135	1.121	1.002	1.16	0.966	NA	NA	NA	NA	NA	NA	NA
SPAC1296.04	1.172	1.122	1.115	1.048	1.162	1.124	1.037	1.096	1.071	NA	NA	NA	NA	NA	NA	NA
SPAC328.01c	1.17	1.092	0.819	0.739	1.067	0.744	1.074	1.131	0.725	NA	NA	NA	NA	NA	NA	NA
SPAC57A7.12	1.17	1.068	1.008	1.017	1.111	1.062	1.022	1.102	0.918	NA	NA	NA	NA	NA	NA	NA
SPAC6F12.09	1.17	1.17	1.046	1.038	1.1	1.164	1.066	0.83	0.664	NA	NA	NA	NA	NA	NA	NA
SPBC776.17	1.17	0.752	0.899	0.671	0.623	0.411	0.931	2.36	1.973	NA	NA	NA	NA	NA	NA	NA
SPCC1393.10	1.17	1.16	0.927	0.941	1.261	1.138	0.938	1.005	0.957	NA	NA	NA	NA	NA	NA	NA
SPCC569.03	1.17	1.117	1.252	1.176	1.112	1.102	1.124	0.924	0.9	NA	NA	NA	NA	NA	NA	NA
SPBP35G2.14	1.169	1.096	1.124	1.046	0.994	1.02	1.211	1.025	1.162	NA	NA	NA	NA	NA	NA	1
SPBC2A9.04c	1.169	1.033	0.924	0.847	1.07	1.155	1.041	1.114	1.001	NA	NA	NA	NA	NA	NA	NA
SPBC9B6.11c	1.169	1.098	0.883	0.947	1.05	0.881	0.961	0.982	0.9	NA	NA	NA	NA	NA	NA	NA
SPCC31H12.04c	1.169	1.053	2.026	1.269	1.057	1.67	1.777	1.284	1.373	NA	NA	NA	NA	NA	NA	NA
SPAC14C4.12c	1.168	0.954	0.799	0.974	0.919	0.936	0.943	0.844	0.861	NA	NA	NA	NA	NA	NA	NA
SPAC1565.07c	1.168	1.121	0.951	1.02	1.233	0.921	0.881	1.055	0.862	NA	NA	NA	NA	NA	NA	NA
SPAC227.18	1.168	1.204	0.958	0.916	1.117	1.049	0.977	0.93	0.853	NA	NA	NA	NA	NA	NA	NA
SPAC2G11.07c	1.168	1.207	1.214	1.042	1.095	1.06	1.15	1.112	1.169	NA	NA	NA	NA	NA	NA	NA
SPAC6G9.08	1.167	1.141	1.044	0.994	1.14	1.009	1.022	1.063	1.006	NA	NA	NA	NA	NA	NA	NA
SPBC16A3.17c	1.167	1.234	1.065	0.974	1.299	1.13	1.016	1.058	1.037	NA	NA	NA	NA	NA	NA	NA
SPBC18H10.07	1.167	1.136	1.63	1.338	0.971	1.301	1.521	1.115	0.962	NA	NA	NA	NA	NA	NA	NA
SPBC119.12	1.166	1.184	1.186	1.212	1.014	1.019	1.17	1.164	1.296	NA	NA	NA	NA	NA	NA	NA
SPAC29B12.06c	1.165	1.136	1.084	1.145	1.126	1.1	1.06	1.231	0.855	NA	NA	NA	NA	NA	NA	1
SPAC1F7.09c	1.165	1.163	1.012	0.948	1.178	0.887	0.849	1.104	1	NA	NA	NA	NA	NA	NA	NA
SPAC57A10.09c	1.165	1.191	1.003	0.944	1.068	0.877	1.028	0.932	0.949	NA	NA	NA	NA	NA	NA	NA
SPAPB1A10.13	1.165	1.215	1.076	1.138	1.239	1.062	0.967	1.162	1.05	NA	NA	NA	NA	NA	NA	NA
SPBC4C3.08	1.165	1.091	1.19	0.902	0.987	1.019	1.053	1.014	1.209	NA	NA	NA	NA	NA	NA	NA
SPBC887.02	1.165	1.08	1.104	1.063	1.077	1.095	1.074	1.032	1.185	NA	NA	NA	NA	NA	NA	NA
SPCC1827.03c	1.165	1.133	1.264	1.269	1.25	1.328	1.15	1.13	1.249	NA	NA	NA	NA	NA	NA	NA
SPAC1783.08c	1.164	1.377	1.229	1.478	1.131	1.425	1.13	0.997	1.212	NA	NA	NA	NA	NA	NA	NA
SPAC15A10.06	1.163	1.03	0.915	1.095	1.221	1.07	1.009	0.997	0.979	NA	NA	NA	NA	NA	NA	NA
SPAPYUG7.03c	1.163	1.015	0.987	0.906	1.025	0.854	0.996	0.999	0.81	NA	NA	NA	NA	NA	NA	NA
SPAC3G6.01	1.162	1.073	1.117	1.021	0.949	0.9	0.926	0.955	1.081	NA	NA	NA	NA	NA	NA	NA
SPAC23C11.13c	1.161	1.128	1.097	1.005	1.168	1.089	1.073	2.107	2.11	NA	NA	NA	NA	NA	NA	NA
SPBC17G9.08c	1.161	1.066	1.127	1.043	1.061	1.094	1.069	1.578	1.781	NA	NA	NA	NA	NA	NA	NA
SPCC1682.14	1.16	1.123	1.022	0.693	1.088	0.679	1.286	1.099	1.271	NA	NA	NA	NA	NA	NA	NA
SPAC3H5.11	1.159	1.084	1.113	1.182	1.081	1.264	1.043	0.944	1.033	NA	NA	NA	NA	NA	NA	NA
SPCC417.07c	1.159	1.191	1.051	0.93	1.326	0.94	0.964	1.238	1.071	NA	NA	NA	NA	NA	NA	NA
SPAC23C11.07	1.158	1.059	1.028	1.06	1.104	1.106	1.026	1.009	0.942	NA	NA	NA	NA	NA	NA	NA
SPAC9E9.14	1.158	1.073	1.256	1.02	1.127	1.036	1.037	1.093	1.099	NA	NA	NA	NA	NA	NA	NA
SPAC167.01	1.157	1.048	1.179	1.25	1.235	1.203	0.957	0.747	0.616	NA	NA	NA	NA	NA	NA	NA
SPBC6B1.02	1.157	1.12	1.172	1.301	1.125	1.044	1.074	1.068	1.008	NA	NA	NA	NA	NA	NA	NA
SPBC887.17	1.157	1.011	0.982	0.994	0.988	0.906	0.979	1.091	1	NA	NA	NA	NA	NA	NA	NA
SPAC343.18	1.156	1.092	0.994	0.973	1.099	0.95	0.978	1.052	0.948	NA	NA	NA	NA	NA	NA	NA
SPBC19C2.02	1.154	1.431	1.048	1.07	1.348	1.149	0.847	1.16	0.741	NA	NA	NA	NA	NA	NA	1
SPAC15E1.07c	1.154	1.062	1.143	0.997	1.029	0.924	1.065	1.04	0.934	NA	NA	NA	NA	NA	NA	NA
SPBC12C2.12c	1.154	1.098	0.939	0.91	1.009	0.702	0.962	1.019	0.83	NA	NA	NA	NA	NA	NA	NA
SPCC1020.07	1.154	1.022	0.916	1.076	1.078	1.142	1.01	1.053	1.509	NA	NA	NA	NA	NA	NA	NA
SPAC17H9.04c	1.153	1.106	1.086	1.065	0.83	0.67	1.057	1.178	0.68	NA	NA	NA	NA	NA	NA	1
SPBC20F10.02c	1.153	1.075	1.142	1.217	1.11	1.214	1.033	1.167	1.075	NA	NA	NA	NA	NA	NA	NA
SPAC23C4.07	1.152	0.992	1.118	1.135	1.005	1.171	1.085	0.964	1.007	NA	NA	NA	NA	NA	NA	NA
SPAC23D3.09	1.152	1.015	1.016	1.023	1.092	1.006	0.97	0.414	0.494	NA	1	NA	1	NA	NA	NA
SPBC1198.14c	1.151	0.948	0.638	0.512	1.013	0.505	0.674	0.971	0.645	NA	1	NA	NA	1	NA	NA
SPAC1002.06c	1.15	0.909	0.931	1.107	0.929	1.084	0.976	0.94	1.081	NA	NA	NA	NA	NA	NA	NA
SPAC11D3.02c	1.15	1.071	1.103	1.195	1.158	1.222	1.045	1.039	1.056	NA	NA	NA	NA	NA	NA	NA
SPAC29B12.13	1.15	1.079	1.091	1.103	1.16	1.171	1.03	1.041	1.028	NA	NA	NA	NA	NA	NA	NA
SPBC16H5.05c	1.15	1.056	1.23	1.019	1.035	1.006	1.018	1	1.039	NA	NA	NA	NA	NA	NA	NA
SPBC23E6.01c	1.149	0.863	1.212	1.341	0.889	1.137	0.929	1.029	1.194	NA	NA	NA	NA	NA	NA	1
SPAC1F8.03c	1.149	1.032	1.057	1.03	1.066	0.98	1.045	1.023	0.966	NA	NA	NA	NA	NA	NA	NA
SPBC21C3.13	1.149	1.063	1.045	1.056	1.115	1.087	1.037	0.964	0.805	NA	NA	NA	NA	NA	NA	NA
SPBC106.10	1.147	1.046	1.148	1.264	0.961	1.204	1.223	0.877	1.027	NA	NA	NA	NA	NA	NA	NA
SPBC1271.08c	1.147	0.962	1.505	1.37	0.935	1.424	1.395	1.052	1.032	NA	NA	NA	NA	NA	NA	NA
SPBC1604.01	1.147	1.078	1.126	0.976	1.01	0.92	1.162	1.021	0.825	NA	NA	NA	NA	NA	NA	NA
SPBC25B2.06c	1.147	0.933	0.961	0.935	0.964	0.915	0.97	0.979	0.964	NA	NA	NA	NA	NA	NA	NA
SPCC16A11.03c	1.147	0.902	0.908	0.995	0.969	0.925	0.916	0.923	0.883	NA	NA	NA	NA	NA	NA	NA
SPBC2A9.03	1.146	1.083	0.998	1.073	1.099	1.151	1.02	1.068	0.943	NA	NA	NA	NA	NA	NA	NA
SPCC1827.04	1.146	1.186	1.035	1.129	1.195	1.228	1.083	1.182	1.152	NA	NA	NA	NA	NA	NA	NA
SPAC3A12.17c	1.145	1.034	1.008	1.001	1.084	1.082	0.999	0.875	1.292	NA	NA	NA	NA	NA	NA	NA
SPAC4H3.02c	1.145	1.076	1.003	1.19	1.07	1.063	0.914	0.912	1.075	NA	NA	NA	NA	NA	NA	NA
SPAC5H10.10	1.145	1.05	1.04	1.011	1.149	1.041	1.03	0.98	0.982	NA	NA	NA	NA	NA	NA	NA
SPBC215.06c	1.145	1.093	1.01	1.013	1.101	1.015	1.001	1.01	0.901	NA	NA	NA	NA	NA	NA	NA
SPBC577.02	1.145	1.161	1.08	0.989	1.118	1.053	1.048	1.527	1.399	NA	NA	NA	NA	NA	NA	NA
SPCC162.11c	1.143	0.904	1.032	1.121	0.937	1.078	0.908	0.711	0.692	NA	1	NA	1	NA	NA	NA
SPAC22H10.02	1.142	1.096	1.003	1.065	1.142	0.97	0.916	1.059	0.901	NA	NA	NA	NA	NA	NA	NA
SPBC1539.08	1.142	0.984	1.34	0.998	1.022	1.079	1.286	1.114	1.13	NA	NA	NA	NA	NA	NA	NA
SPBC21D10.09c	1.142	0.981	1.164	0.937	0.827	0.903	1.035	0.929	1.116	NA	NA	NA	NA	NA	NA	NA
SPBP16F5.05c	1.142	1.069	0.982	1.092	1.061	0.976	0.963	0.893	0.849	NA	NA	NA	NA	NA	NA	NA
SPAC328.03	1.141	1.043	1.156	1.026	1.05	1.198	1.075	0.964	0.939	NA	NA	NA	NA	NA	NA	NA
SPBC29A3.07c	1.14	1.053	1.042	1.147	1.123	1.198	0.981	0.918	1.212	NA	NA	NA	NA	NA	NA	1
SPBC18H10.19	1.14	1.26	1.059	1.017	1.277	1.218	0.881	1.244	1.423	NA	NA	NA	NA	NA	NA	NA
SPBC28F2.10c	1.14	1.219	1.18	1.147	1.011	1.002	1	1.208	1.662	NA	NA	NA	NA	NA	NA	NA
SPBC1289.09	1.139	1.09	1.151	1.025	1.1	0.989	0.972	1.046	0.965	NA	NA	NA	NA	NA	NA	NA
SPBC713.11c	1.139	1.123	1.039	1.039	1.144	1.125	1.102	0.947	0.876	NA	NA	NA	NA	NA	NA	NA
SPAC31G5.18c	1.138	1.313	1.383	1.469	1.331	1.346	1.198	1.513	1.661	NA	NA	NA	NA	NA	NA	NA
SPBC29A3.03c	1.138	1.051	0.977	1.161	1.17	1.093	0.905	1.064	1.219	NA	NA	NA	NA	NA	NA	NA
SPBC2F12.04	1.138	1	0.975	0.964	1.039	0.998	1.024	0.997	0.999	NA	NA	NA	NA	NA	NA	NA
SPAC139.04c	1.137	1.065	0.986	1.079	1.103	1.076	0.974	1.005	0.986	NA	NA	NA	NA	NA	NA	NA
SPBC215.04	1.137	1.038	1.604	1.1	1.02	1.15	1.184	1.027	1.294	NA	NA	NA	NA	NA	NA	NA
SPBC27.04	1.137	1.043	1.03	1.057	1.062	1.088	1.049	1	0.933	NA	NA	NA	NA	NA	NA	NA
SPBC4F6.11c	1.137	1.088	1.185	1.066	1.124	1.009	1.006	1.072	0.97	NA	NA	NA	NA	NA	NA	NA
SPBC839.14c	1.137	1.067	1.016	1.178	1.199	1.215	0.93	1.062	1.17	NA	NA	NA	NA	NA	NA	NA
SPBP8B7.25	1.137	1.062	1.043	1.121	1.094	1.241	1.049	1.018	0.929	NA	NA	NA	NA	NA	NA	NA
SPCC970.07c	1.137	1.201	1.289	1.072	1.059	1.105	1.044	1.133	1.108	NA	NA	NA	NA	NA	NA	NA
SPAC1687.07	1.136	1.107	1.153	1.118	1.056	1.074	1.073	1.052	1.039	NA	NA	NA	NA	NA	NA	NA
SPAC1805.04	1.136	1.011	1.045	0.948	1.01	0.909	0.985	1.055	1.049	NA	NA	NA	NA	NA	NA	NA
SPAC227.11c	1.136	1.119	1.011	1.091	1.127	1.104	0.981	1.052	0.998	NA	NA	NA	NA	NA	NA	NA
SPBC1703.14c	1.136	1.08	1.186	1.14	1.087	1.045	1.201	0.979	0.995	NA	NA	NA	NA	NA	NA	NA
SPBC3H7.12	1.136	1.177	1.246	1.213	1.131	0.764	0.749	1.173	1.37	NA	NA	NA	NA	NA	NA	NA
SPCC162.05	1.136	1.075	1.003	1.021	1.11	1.013	0.947	0.961	1.123	NA	NA	NA	NA	NA	NA	NA
SPCC338.08	1.136	1.059	1.12	1.123	1.084	1.121	1.041	1.039	0.936	NA	NA	NA	NA	NA	NA	NA
SPCC594.06c	1.136	1.144	1.14	1.217	1.105	1.15	0.955	0.974	0.947	NA	NA	NA	NA	NA	NA	NA
SPAC11D3.14c	1.135	1.077	1.048	1.022	1.078	0.9	1.011	1.009	0.953	NA	NA	NA	NA	NA	NA	NA
SPAC4G9.10	1.135	1.29	1.071	1.068	1.061	0.701	1.078	0.756	0.658	NA	NA	NA	NA	NA	NA	NA
SPBC13E7.09	1.135	1.071	1.099	1.022	1.051	1.002	1.093	0.996	0.899	NA	NA	NA	NA	NA	NA	NA
SPAC1687.23c	1.134	1.2	1.082	1.102	1.18	1.056	0.974	1.099	0.955	NA	NA	NA	NA	NA	NA	NA
SPAC14C4.13	1.133	1.122	1.174	1.142	1.138	1.192	1.062	0.997	1.118	NA	NA	NA	NA	NA	NA	NA
SPBC1604.18c	1.133	1.2	0.889	1.05	1.268	0.981	0.943	1.262	1.061	NA	NA	NA	NA	NA	NA	NA
SPBC2G5.04c	1.133	0.996	0.865	0.902	0.974	0.871	0.968	0.972	1.001	NA	NA	NA	NA	NA	NA	NA
SPCC338.04	1.133	1.178	1.042	0.995	1.13	0.961	1.007	1.188	1.053	NA	NA	NA	NA	NA	NA	NA
SPCC74.05	1.133	1.215	1.201	0.95	1.146	1.078	1.107	1.236	1.18	NA	NA	NA	NA	NA	NA	NA
SPAPB1A10.12c	1.132	1.105	1.065	1.023	1.138	0.913	1.048	0.915	0.994	NA	NA	NA	NA	NA	NA	NA
SPCC1235.03	1.132	1.188	1.037	0.962	1.219	0.952	0.922	1.191	1.139	NA	NA	NA	NA	NA	NA	NA
SPCC162.01c	1.131	1.104	1.217	1.072	1.078	1.17	1.186	0.892	1.141	NA	NA	NA	NA	NA	NA	1
SPAC23C4.08	1.131	1.148	1.031	0.932	1.04	0.924	0.945	1.221	1.002	NA	NA	NA	NA	NA	NA	NA
SPBC32F12.03c	1.131	1.086	1.198	1.461	1.172	1.273	1.083	1.022	1.386	NA	NA	NA	NA	NA	NA	NA
SPAC25H1.07	1.13	0.966	1.145	1.008	0.949	0.852	1.117	1.073	0.788	NA	NA	NA	NA	NA	NA	NA
SPAC30.04c	1.13	1.065	1.001	1.016	1.159	1.017	0.955	1.219	1.011	NA	NA	NA	NA	NA	NA	NA
SPCC1020.05	1.13	1.109	1.003	0.973	1.12	1.068	1.027	0.964	0.926	NA	NA	NA	NA	NA	NA	NA
SPCC794.09c	1.129	1.121	0.842	1.021	1.202	1.034	0.916	1.187	0.991	NA	NA	NA	NA	NA	NA	1
SPAC1952.03	1.129	1.298	0.958	1.142	1.188	0.851	0.874	0.89	0.858	NA	NA	NA	NA	NA	NA	NA
SPAC9.08c	1.129	1.051	0.958	1.175	1.214	1.018	0.934	0.898	1.057	NA	NA	NA	NA	NA	NA	NA
SPBC1271.09	1.129	1.135	1.142	1.089	1.253	1.144	1.052	1.084	1.098	NA	NA	NA	NA	NA	NA	NA
SPBC651.10	1.129	1.088	1.348	1.045	1.132	1.087	1.202	1.084	1.237	NA	NA	NA	NA	NA	NA	NA
SPAC2C4.06c	1.128	1.105	1.089	1.235	1.123	1.171	0.977	1.079	1.069	NA	NA	NA	NA	NA	NA	NA
SPAC821.03c	1.128	1.14	1.076	0.989	1.165	1.008	1.143	1.037	0.84	NA	NA	NA	NA	NA	NA	NA
SPBC16D10.07c	1.128	1.031	0.93	0.901	1.069	0.851	0.918	0.91	0.907	NA	NA	NA	NA	NA	NA	NA
SPBC25D12.06	1.128	0.992	0.924	0.744	0.922	0.83	1	0.145	0.139	NA	1	NA	1	NA	NA	NA
SPBC32H8.03	1.128	0.96	1.039	1.102	1.126	1.228	1.003	0.886	1.133	NA	NA	NA	NA	NA	NA	NA
SPCC16C4.14c	1.128	1.27	0.811	1.225	1.246	1.102	0.897	1.14	1.04	NA	NA	NA	NA	NA	NA	NA
SPAC823.15	1.127	1.11	1.194	1.338	1.139	1.434	1.075	0.968	1.324	NA	NA	NA	NA	NA	NA	NA
SPBC1706.01	1.127	1.172	1.132	1.054	1.185	1.136	1.257	1.286	1.238	NA	NA	NA	NA	NA	NA	NA
SPAC23A1.11	1.126	1.114	0.989	1.136	1.12	1.045	0.93	2.141	2.084	NA	NA	NA	NA	NA	NA	NA
SPAC5D6.10c	1.126	1.076	1.047	0.95	1.049	0.752	0.931	0.994	0.922	NA	NA	NA	NA	NA	NA	NA
SPBC18H10.08c	1.125	1.117	0.97	1.013	1.129	1.105	0.93	0.925	0.883	NA	NA	NA	NA	NA	NA	NA
SPAC14C4.05c	1.124	1.068	0.997	1.159	1.129	1.15	0.949	0.874	1.058	NA	NA	NA	NA	NA	NA	NA
SPAC24C9.05c	1.124	1.072	1.089	1.033	1.043	1.055	1.146	1.102	0.933	NA	NA	NA	NA	NA	NA	NA
SPAC521.05	1.123	1.045	0.926	0.998	1.073	0.966	0.959	1.2	1.224	NA	NA	NA	NA	NA	NA	NA
SPBC13G1.10c	1.123	0.98	1.089	1.12	1.002	1.222	1.055	0.836	1.237	NA	NA	NA	NA	NA	NA	NA
SPBP8B7.23	1.123	1.095	1.055	1.035	1.098	1.113	1.039	1.02	0.937	NA	NA	NA	NA	NA	NA	NA
SPAC11D3.05	1.122	1.125	1.052	1.095	1.152	1.032	1.04	1.129	0.999	NA	NA	NA	NA	NA	NA	NA
SPAC22E12.14c	1.122	1.026	0.714	0.717	1.063	0.761	0.848	1.129	0.832	NA	NA	NA	NA	NA	NA	NA
SPAC23G3.04	1.122	1.165	0.952	0.98	1.189	0.995	0.993	1.197	1.089	NA	NA	NA	NA	NA	NA	NA
SPAC458.02c	1.122	1.061	1.103	0.912	1.045	0.861	1.028	1.08	0.949	NA	NA	NA	NA	NA	NA	NA
SPBC3E7.10	1.122	0.967	1.275	1.013	0.959	0.979	1.027	0.851	1.184	NA	NA	NA	NA	NA	NA	NA
SPCC584.15c	1.122	1.057	1.146	1.014	1.064	0.981	1.1	1.093	1.053	NA	NA	NA	NA	NA	NA	NA
SPAC8F11.03	1.121	1.057	0.874	0.731	1.164	1.037	0.966	1.068	1.018	NA	NA	NA	NA	NA	NA	NA
SPAPB21F2.02	1.121	1.164	1.066	1.179	1.172	1.394	1.171	0.991	1.198	NA	NA	NA	NA	NA	NA	NA
SPBC21B10.05c	1.121	1.027	0.997	1.033	0.994	0.787	0.941	0.996	0.967	NA	NA	NA	NA	NA	NA	NA
SPBC18E5.07	1.119	1.072	1.052	0.956	1.014	1.05	1.062	0.953	0.937	NA	NA	NA	NA	NA	NA	NA
SPAC29A4.17c	1.118	0.991	0.939	1.053	1.09	1.07	0.92	1.223	1.173	NA	NA	NA	NA	NA	NA	NA
SPAC4F8.01	1.118	1.116	1.078	1.137	1.074	1.046	1.072	1.243	1.236	NA	NA	NA	NA	NA	NA	NA
SPBC27B12.05	1.118	1.045	0.97	0.99	1.097	1.099	1.008	1.083	0.943	NA	NA	NA	NA	NA	NA	NA
SPCC1281.04	1.118	1.057	0.955	0.935	1.151	0.835	0.921	0.911	0.858	NA	NA	NA	NA	NA	NA	NA
SPAC4G8.11c	1.117	1.044	1.163	0.971	1.05	1.038	1.238	0.143	0.105	NA	1	NA	NA	1	NA	NA
SPBC29B5.03c	1.117	1.05	1.101	1.234	1.059	1.16	1.065	1.002	1.075	NA	NA	NA	NA	NA	NA	NA
SPAC23G3.02c	1.116	1.035	1.028	1.206	1.058	1.039	0.981	1.065	1.03	NA	NA	NA	NA	NA	NA	NA
SPAC6F12.04	1.116	1.1	0.942	1.117	1.134	1.199	1.028	1.087	1.034	NA	NA	NA	NA	NA	NA	NA
SPBC106.20	1.116	1.211	1.127	0.954	1.129	0.968	1.039	1.046	0.895	NA	NA	NA	NA	NA	NA	NA
SPBC21D10.12	1.116	1.14	1.19	0.941	1.07	0.926	1.298	1.067	0.955	NA	NA	NA	NA	NA	NA	NA
SPBC32H8.05	1.116	1.046	1.055	1.085	1.142	1.168	0.981	0.999	0.962	NA	NA	NA	NA	NA	NA	NA
SPAC1786.01c	1.115	1.043	1.008	1.344	1.104	1.251	0.989	0.813	1.339	NA	NA	NA	NA	NA	NA	NA
SPAC3C7.02c	1.115	1.138	1.151	1.126	1.188	1.311	0.953	0.96	1.406	NA	NA	NA	NA	NA	NA	NA
SPAC6F6.13c	1.115	1.019	1.059	0.959	0.975	0.983	0.983	0.973	0.895	NA	NA	NA	NA	NA	NA	NA
SPBC1652.02	1.115	1.23	1.085	1.115	1.234	1.132	1.049	1.323	1.126	NA	NA	NA	NA	NA	NA	NA
SPCC285.15c	1.115	1.132	1.284	1.249	1.207	1.447	1.409	1.238	1.309	NA	NA	NA	NA	NA	NA	NA
SPCC550.15c	1.115	1.097	1.152	1.003	1.116	1.007	1.177	1.069	0.918	NA	NA	NA	NA	NA	NA	NA
SPAC12G12.03	1.114	1.127	1.124	1.042	1.143	1.063	1.083	1.213	1.208	NA	NA	NA	NA	NA	NA	1
SPAC13G7.04c	1.114	1.17	1.122	1.067	1.194	1.016	0.932	0.953	1.205	NA	NA	NA	NA	NA	NA	NA
SPBPJ4664.03	1.114	1.016	1	0.973	1.055	1.088	0.995	1.023	0.929	NA	NA	NA	NA	NA	NA	NA
SPAC343.07	1.113	1.102	0.981	1.123	1.139	1.136	0.925	1.235	1.165	NA	NA	NA	NA	NA	NA	1
SPAC2C4.08	1.113	1.088	1.003	1.128	1.154	1.156	0.932	1.072	1.151	NA	NA	NA	NA	NA	NA	NA
SPAC630.06c	1.113	1.059	1.129	1.162	1.126	1.129	1.081	1.046	1.049	NA	NA	NA	NA	NA	NA	NA
SPBC19C2.06c	1.113	1.121	1.329	1.053	1.138	1.103	1.108	0.941	0.889	NA	NA	NA	NA	NA	NA	NA
SPCC1906.02c	1.113	1.084	0.982	1.024	1.172	1.017	1.089	0.877	0.801	NA	NA	NA	NA	NA	NA	NA
SPCC645.12c	1.113	1.012	1.093	1.003	1.002	1.081	1.103	1.07	0.994	NA	NA	NA	NA	NA	NA	NA
SPAC31A2.16	1.112	1.058	1.071	0.957	1.025	0.816	0.984	1.061	1.272	NA	NA	NA	NA	NA	NA	NA
SPAC8C9.11	1.112	1.142	0.993	1.055	1.085	0.718	0.929	1.125	1.079	NA	NA	NA	NA	NA	NA	NA
SPBC29A3.13	1.112	1.148	1.329	1.008	1.095	1.052	0.995	1.226	1.08	NA	NA	NA	NA	NA	NA	NA
SPBC428.17c	1.112	1.081	0.963	0.992	1.148	0.99	0.965	1.017	1.213	NA	NA	NA	NA	NA	NA	NA
SPCC162.02c	1.112	1.175	0.969	1.032	1.154	1.084	0.938	1.27	1.128	NA	NA	NA	NA	NA	NA	NA
SPCC1739.06c	1.112	1.154	1.193	0.976	1.046	0.86	0.901	1.438	0.916	NA	NA	NA	NA	NA	NA	NA
SPAC31A2.14	1.111	1.172	1.118	1.09	1.134	0.932	0.916	0.929	0.785	NA	NA	NA	NA	NA	NA	NA
SPBC31F10.08	1.111	1.017	0.99	0.996	1.031	1.007	0.996	1.111	1.017	NA	NA	NA	NA	NA	NA	NA
SPBC354.07c	1.111	1.028	1.106	1.066	0.975	1.044	1.038	1.077	0.976	NA	NA	NA	NA	NA	NA	NA
SPCC31H12.02c	1.111	1.022	1.039	1.133	1.131	1.243	0.958	0.989	1.163	NA	NA	NA	NA	NA	NA	NA
SPCC737.04	1.111	1.062	0.995	1.017	1.072	0.99	0.94	0.833	0.972	NA	NA	NA	NA	NA	NA	NA
SPAC23H4.10c	1.11	1.022	1.085	1.232	1.072	1.277	0.941	1.071	1.113	NA	NA	NA	NA	NA	NA	NA
SPAC24C9.08	1.11	1.015	0.985	0.962	1.051	1.021	0.973	0.924	0.987	NA	NA	NA	NA	NA	NA	NA
SPBC28F2.11	1.11	1.031	1.032	1.009	1.117	1.059	0.992	0.995	1.03	NA	NA	NA	NA	NA	NA	NA
SPAC19E9.02	1.109	1.042	1.186	1.005	1.057	1.036	1.133	1.024	1.045	NA	NA	NA	NA	NA	NA	NA
SPAC26F1.05	1.109	0.999	1.093	1.142	1.055	1.169	1.035	1.042	1.035	NA	NA	NA	NA	NA	NA	NA
SPAC8E11.01c	1.109	1.078	1.018	1.208	1.199	1.238	0.973	0.985	1.179	NA	NA	NA	NA	NA	NA	NA
SPCC1672.09	1.109	0.999	0.987	0.966	1.083	0.956	0.964	1.03	1.006	NA	NA	NA	NA	NA	NA	NA
SPCC1827.07c	1.109	1.031	1.095	1.016	0.986	0.924	1.094	0.955	0.911	NA	NA	NA	NA	NA	NA	NA
SPAC630.13c	1.108	1.236	1.348	1.315	1.334	1.414	1.16	1.232	1.21	NA	NA	NA	NA	NA	NA	NA
SPAP27G11.02	1.108	1.238	0.99	1.012	1.272	1	1.044	1.12	0.841	NA	NA	NA	NA	NA	NA	NA
SPBC1921.06c	1.108	0.988	1.252	1.097	0.97	1.084	1.287	0.964	0.99	NA	NA	NA	NA	NA	NA	NA
SPBC29A10.10c	1.108	1.037	1.008	1.076	1.096	1.035	0.984	1.018	1.195	NA	NA	NA	NA	NA	NA	NA
SPBC29A10.06c	1.107	1.198	0.98	1.131	1.241	1.176	0.905	1.083	1.084	NA	NA	NA	NA	NA	NA	NA
SPCC1223.03c	1.107	1.093	1.06	1.127	1.136	1.022	1.064	1.036	0.79	NA	NA	NA	NA	NA	NA	NA
SPAC1039.02	1.106	1.155	1.108	1.19	1.137	1.162	0.98	1.011	1.038	NA	NA	NA	NA	NA	NA	NA
SPAC26A3.04	1.106	1.068	0.886	1.025	1.108	1.01	0.891	1.836	2.221	NA	NA	NA	NA	NA	NA	NA
SPBC16E9.13	1.106	1.028	0.94	0.893	0.837	0.783	0.831	0.785	0.899	NA	NA	NA	NA	NA	NA	NA
SPBC776.11	1.106	1.058	1.198	1.039	1.079	1.116	1.181	1.146	1.054	NA	NA	NA	NA	NA	NA	NA
SPCC663.14c	1.106	1.049	1.155	1.032	0.994	0.863	0.94	0.961	1.009	NA	NA	NA	NA	NA	NA	NA
SPAC19A8.03	1.105	1.06	1.161	1.126	1.056	0.994	1.099	1.047	1.066	NA	NA	NA	NA	NA	NA	NA
SPAC19B12.06c	1.105	1.01	1.059	1.022	0.951	0.978	1.033	0.97	0.993	NA	NA	NA	NA	NA	NA	NA
SPACUNK4.17	1.105	1.107	1.142	1.059	1.166	1.06	1.079	1.039	1.01	NA	NA	NA	NA	NA	NA	NA
SPBC1105.13c	1.105	1.021	1.045	1.045	1.014	1.003	0.991	0.893	1.296	NA	NA	NA	NA	NA	NA	NA
SPAC2F3.07c	1.104	1.099	0.977	1.141	1.185	1.198	0.927	1.12	1.058	NA	NA	NA	NA	NA	NA	NA
SPCC126.04c	1.103	1.257	1.383	1.608	1.212	1.78	1.326	1.066	1.689	NA	NA	NA	NA	NA	NA	NA
SPAP8A3.07c	1.102	0.942	0.948	0.904	0.534	0.606	1.242	0.391	0.206	NA	1	NA	1	NA	NA	NA
SPBC16H5.11c	1.102	1.044	1.136	0.946	0.968	0.893	1.208	1.005	0.927	NA	NA	NA	NA	NA	NA	NA
SPBC16A3.18	1.101	1.062	1.195	0.967	1	0.8	1.145	1.099	1.081	NA	NA	NA	NA	NA	NA	1
SPAC7D4.02c	1.101	1.053	1.007	1.015	1.094	1.047	1.003	1.086	0.918	NA	NA	NA	NA	NA	NA	NA
SPAC8F11.02c	1.101	1.154	1.003	1.097	0.989	0.94	0.869	0.893	0.892	NA	NA	NA	NA	NA	NA	NA
SPBC3B8.07c	1.101	1.036	0.954	0.988	1.058	1.038	0.989	0.993	0.838	NA	NA	NA	NA	NA	NA	NA
SPCC1020.13c	1.101	1.078	1.065	1.042	1.071	1.052	1.064	1.094	1.089	NA	NA	NA	NA	NA	NA	NA
SPAC23C4.16c	1.1	1.019	1.102	1.149	1.043	1.134	1.036	1.074	1.12	NA	NA	NA	NA	NA	NA	NA
SPAC3G9.04	1.1	1.14	0.883	1.082	1.1	0.921	0.761	1.195	0.846	NA	NA	NA	NA	NA	NA	NA
SPAC6G9.04	1.1	1.006	1.038	1.097	1.081	1.049	1.016	0.974	1.003	NA	NA	NA	NA	NA	NA	NA
SPAC22A12.14c	1.099	1.007	1.01	1.033	1.019	0.956	1.021	0.953	0.918	NA	NA	NA	NA	NA	NA	NA
SPAC2C4.09	1.099	1.006	1.099	1.156	1.093	1.214	1.179	0.882	1.17	NA	NA	NA	NA	NA	NA	NA
SPBC29A10.12	1.099	1.018	0.995	1.061	0.997	0.96	0.988	0.974	0.902	NA	NA	NA	NA	NA	NA	NA
SPBC651.09c	1.099	1.151	0.958	0.808	0.96	0.649	0.838	0.856	0.728	NA	1	NA	NA	1	NA	NA
SPBC685.07c	1.099	0.898	1.024	0.957	0.776	0.658	0.906	2.577	2.331	NA	NA	NA	NA	NA	NA	NA
SPBC8E4.03	1.099	1.005	0.984	1.01	0.98	0.9	0.955	0.963	0.849	NA	NA	NA	NA	NA	NA	NA
SPAC11G7.02	1.098	1.069	0.98	1.135	1.091	1.075	1.018	0.73	0.861	NA	NA	NA	NA	NA	NA	NA
SPAC2F7.10	1.098	1.104	0.711	0.768	1.062	0.728	0.801	1.085	0.658	NA	1	NA	NA	1	NA	NA
SPAC7D4.12c	1.098	1.07	1.069	1.041	1.134	1.047	1.16	1.114	1.307	NA	NA	NA	NA	NA	NA	NA
SPAPB17E12.04c	1.098	1.134	0.947	0.834	0.968	0.838	0.943	1.184	0.977	NA	NA	NA	NA	NA	NA	NA
SPBC3D6.10	1.098	0.983	1.036	1.117	1.153	1.083	0.995	0.893	1.128	NA	NA	NA	NA	NA	NA	NA
SPAC167.06c	1.097	1.11	1.002	1.088	1.211	1.161	0.964	1.047	0.934	NA	NA	NA	NA	NA	NA	NA
SPAPB17E12.03	1.097	1.03	0.949	0.958	0.956	0.837	1.061	0.9	0.866	NA	NA	NA	NA	NA	NA	NA
SPBC336.05c	1.097	1.073	1.14	1.229	1.095	1.265	1.024	0.982	1.121	NA	NA	NA	NA	NA	NA	NA
SPBC3D6.02	1.097	1.044	1.129	1.064	1.056	1.102	1.025	0.929	0.839	NA	NA	NA	NA	NA	NA	NA
SPAC14C4.08	1.096	1.062	0.966	1.138	1.071	1.163	0.939	1.065	1.047	NA	NA	NA	NA	NA	NA	NA
SPAC4H3.06	1.096	1.004	0.996	1.14	1.15	1.159	0.976	1.035	1.274	NA	NA	NA	NA	NA	NA	NA
SPBC15D4.06	1.096	1.029	1.226	1.092	1.064	0.975	1.042	1.049	1.184	NA	NA	NA	NA	NA	NA	NA
SPBC21B10.08c	1.096	1.13	1.055	1.108	1.087	0.969	1.025	1.014	0.952	NA	NA	NA	NA	NA	NA	NA
SPBC2G5.02c	1.096	1.124	0.963	0.945	1.046	0.921	1.042	1.276	0.773	NA	NA	NA	NA	NA	NA	NA
SPCC18B5.03	1.096	1.124	0.894	0.934	1.152	0.966	0.927	0.768	0.664	NA	1	NA	1	NA	NA	NA
SPCC553.08c	1.096	1.035	1.006	0.886	1.047	0.746	0.905	1.913	1.97	NA	NA	NA	NA	NA	NA	NA
SPAC513.03	1.095	1.137	1.103	1.313	1.118	1.347	1.006	1.151	1.286	NA	NA	NA	NA	NA	NA	NA
SPAC664.14	1.095	1.099	1.039	1.012	1.145	1.02	1.002	1.004	0.938	NA	NA	NA	NA	NA	NA	NA
SPBC365.11	1.095	0.937	1.029	0.943	0.935	0.945	0.964	0.973	0.9	NA	NA	NA	NA	NA	NA	NA
SPBC530.04	1.095	0.984	1.08	1.033	1.003	1.051	1.14	1.158	0.921	NA	NA	NA	NA	NA	NA	NA
SPAC22E12.05c	1.094	1.088	1.15	1.222	1.225	1.242	0.917	1.018	1.469	NA	NA	NA	NA	NA	NA	NA
SPAC22G7.08	1.094	1.015	1.095	1.053	1.036	1.027	1.062	0.978	0.896	NA	NA	NA	NA	NA	NA	NA
SPAC824.02	1.094	0.982	1	0.974	1.052	1.051	0.979	0.914	1.259	NA	NA	NA	NA	NA	NA	NA
SPBC16A3.02c	1.094	1.095	1.066	1.044	1.16	1.086	0.855	0.999	1.06	NA	NA	NA	NA	NA	NA	NA
SPBC18A7.01	1.094	1.018	0.884	0.984	1.045	0.89	0.924	0.952	1.041	NA	NA	NA	NA	NA	NA	NA
SPBC31F10.07	1.094	0.999	0.969	0.909	1.047	1.121	0.973	1	1.06	NA	NA	NA	NA	NA	NA	NA
SPBC8D2.01	1.094	1.093	1.12	1.328	1.175	1.146	1.039	1.053	0.959	NA	NA	NA	NA	NA	NA	NA
SPCC18B5.11c	1.094	1.072	1.105	1.029	1.178	1.066	0.986	0.965	0.981	NA	NA	NA	NA	NA	NA	NA
SPAC13G7.13c	1.093	1.084	0.983	1.034	1.121	1.038	0.918	1.019	0.991	NA	NA	NA	NA	NA	NA	1
SPAC664.02c	1.093	1.016	1.096	1.077	1.063	1.049	1.046	0.988	1.169	NA	NA	NA	NA	NA	NA	NA
SPBC1348.02	1.093	1.068	0.977	0.986	1.088	1.028	0.867	0.887	0.986	NA	NA	NA	NA	NA	NA	NA
SPBC17F3.01c	1.093	1.047	1.159	1.289	1.055	0.966	1.058	0.976	1.053	NA	NA	NA	NA	NA	NA	NA
SPBC3B8.05	1.093	0.992	1.051	1.037	0.955	0.929	0.995	0.92	1.16	NA	NA	NA	NA	NA	NA	NA
SPBP16F5.08c	1.093	1.162	1.141	1.326	1.138	1.09	0.936	0.968	1.005	NA	NA	NA	NA	NA	NA	NA
SPBP8B7.22	1.093	0.834	0.582	1.036	0.705	0.672	0.711	1.014	0.945	NA	NA	NA	NA	NA	NA	NA
SPAC13C5.03	1.092	1.071	0.953	1.141	1.117	1.156	0.916	1.032	1.179	NA	NA	NA	NA	NA	NA	NA
SPAC19A8.10	1.092	1.029	1.077	0.989	1.027	0.923	1.116	0.934	0.888	NA	NA	NA	NA	NA	NA	NA
SPAC2E1P3.02c	1.092	1.062	0.988	0.976	1.018	0.914	1.032	0.986	0.971	NA	NA	NA	NA	NA	NA	NA
SPBC19G7.10c	1.092	1.034	1.186	0.907	1.034	0.999	1.105	0.939	0.852	NA	NA	NA	NA	NA	NA	NA
SPBC3B9.05	1.092	1	1.06	1.114	1.059	1.188	1.035	0.921	1.087	NA	NA	NA	NA	NA	NA	NA
SPBP8B7.18c	1.092	1.016	0.95	1.003	1.03	0.968	1.005	0.988	0.873	NA	NA	NA	NA	NA	NA	NA
SPCC1450.12	1.092	1.122	0.957	1.167	1.192	1.21	0.899	1.061	1.044	NA	NA	NA	NA	NA	NA	NA
SPCC18.02	1.092	1.047	1.04	1.019	1.123	1.037	1.059	1.015	0.906	NA	NA	NA	NA	NA	NA	NA
SPAC12B10.16c	1.091	1.112	0.838	1.069	1.217	0.971	0.948	1.107	0.864	NA	NA	NA	NA	NA	NA	NA
SPAC20G4.04c	1.091	1.082	1.296	1.077	1.074	1.179	1.326	1.039	1.106	NA	NA	NA	NA	NA	NA	NA
SPAC23H4.17c	1.091	1.09	1.195	1.047	1.039	1.066	1.115	1.883	1.144	NA	NA	NA	NA	NA	NA	NA
SPBC13A2.04c	1.091	1.09	0.761	0.867	0.979	0.751	0.77	0.884	0.827	NA	NA	NA	NA	NA	NA	NA
SPCC757.05c	1.091	1.067	1.021	1.048	1.162	1.114	0.9	0.997	1.023	NA	NA	NA	NA	NA	NA	NA
SPAC15E1.03	1.09	1.08	1.055	1.196	1.213	1.212	0.867	1.305	1.317	NA	NA	NA	NA	NA	NA	NA
SPAC26F1.02	1.09	0.989	1.114	1.114	1.004	1.021	0.947	1.055	1.095	NA	NA	NA	NA	NA	NA	NA
SPBC18H10.15	1.09	1.149	1.051	0.912	1.063	1.028	1.051	1	1.022	NA	NA	NA	NA	NA	NA	NA
SPBP22H7.06	1.09	1.004	1.009	0.998	1.011	1.084	1.049	1.064	1.087	NA	NA	NA	NA	NA	NA	NA
SPCC63.14	1.09	1.094	1.102	1.201	1.12	1.156	1.008	1.032	0.955	NA	NA	NA	NA	NA	NA	NA
SPAC17G6.06	1.089	0.954	0.795	1.029	1	1.075	0.936	0.903	1.035	NA	NA	NA	NA	NA	NA	NA
SPAC23A1.06c	1.089	1.008	1.002	0.922	0.932	0.921	1.001	0.977	0.845	NA	NA	NA	NA	NA	NA	NA
SPAC23A1.07	1.089	1.224	0.916	0.808	1.12	0.947	0.952	0.985	1.01	NA	NA	NA	NA	NA	NA	NA
SPAC6F6.09	1.089	1.093	0.93	0.852	1.022	0.866	0.964	1.143	1.013	NA	NA	NA	NA	NA	NA	NA
SPBC17D11.01	1.089	1.132	1.056	1.201	1.157	1.303	0.836	1.191	1.113	NA	NA	NA	NA	NA	NA	NA
SPCC16A11.01	1.089	0.953	0.993	0.969	0.969	0.982	0.989	0.945	0.893	NA	NA	NA	NA	NA	NA	NA
SPAC17D4.04	1.088	1.083	0.859	0.907	1.062	0.831	0.919	1.377	2.122	NA	NA	NA	NA	NA	NA	1
SPCC1840.06	1.088	1.22	1.272	1.128	1.227	1.176	1.012	1.163	1.215	NA	NA	NA	NA	NA	NA	NA
SPAC6G9.05	1.087	1.001	1.119	1.014	1.065	0.999	0.987	1.009	0.954	NA	NA	NA	NA	NA	NA	NA
SPBC16A3.14	1.087	0.961	1.239	1.097	1.043	1.132	1.171	0.961	1.145	NA	NA	NA	NA	NA	NA	NA
SPCC1450.08c	1.087	1.018	0.782	0.726	0.992	0.743	0.841	0.948	0.911	NA	NA	NA	NA	NA	NA	NA
SPCPB16A4.06c	1.086	1.135	1	1.147	1.207	1.227	1.04	1.02	1.715	NA	NA	NA	NA	NA	NA	NA
SPBC4B4.04	1.085	1.028	1.141	1.046	1.001	0.898	1.133	1.099	1.137	NA	NA	NA	NA	NA	NA	1
SPAC6G10.08	1.085	1.061	1.202	1.192	1.038	1.107	1.072	0.382	1.116	NA	NA	NA	NA	NA	NA	NA
SPBC17D1.02	1.085	1.25	1.185	1.019	1.068	0.759	0.97	0.959	1.121	NA	NA	NA	NA	NA	NA	NA
SPBC365.10	1.085	1.111	1.198	1.442	1.165	1.089	1.002	1.137	1.042	NA	NA	NA	NA	NA	NA	NA
SPAC13C5.06c	1.084	1.032	1.086	1.035	1.004	1.05	1.062	0.975	1.028	NA	NA	NA	NA	NA	NA	NA
SPAC16A10.04	1.084	0.957	1.067	1.014	0.956	0.804	0.886	1.26	1.317	NA	NA	NA	NA	NA	NA	NA
SPAC19A8.04	1.084	1.027	1.056	1.182	1.034	1.019	1.032	0.907	1.003	NA	NA	NA	NA	NA	NA	NA
SPAC2F3.15	1.084	1.125	1.039	1.032	1.071	0.997	1.112	0.975	0.924	NA	NA	NA	NA	NA	NA	NA
SPAC343.10	1.084	1.116	1.235	0.92	0.995	1.018	1.057	1.121	1.232	NA	NA	NA	NA	NA	NA	NA
SPAC8C9.07	1.084	0.772	0.757	0.602	0.746	0.387	0.839	1.922	1.978	NA	NA	NA	NA	NA	NA	NA
SPBC83.04	1.084	0.986	1.095	1.082	1.112	1.196	0.999	0.948	1.056	NA	NA	NA	NA	NA	NA	NA
SPBP4H10.13	1.084	1.021	1.184	1.205	1.074	1.344	1.45	1.026	1.166	NA	NA	NA	NA	NA	NA	NA
SPCC1020.12c	1.084	1.033	0.972	1.041	1.118	1.262	1.018	1.113	1.06	NA	NA	NA	NA	NA	NA	NA
SPBC17G9.05	1.083	1.053	1.072	1.038	1.075	1.052	1.109	1.009	0.901	NA	NA	NA	NA	NA	NA	1
SPAC8E11.03c	1.083	1.021	0.914	0.906	1.076	1.079	0.906	1.09	0.912	NA	NA	NA	NA	NA	NA	NA
SPBC1734.07c	1.083	0.937	1.002	1.066	0.945	1.118	1.01	1.092	1.344	NA	NA	NA	NA	NA	NA	NA
SPBC19C7.09c	1.083	1.048	1.08	0.998	1.003	0.927	1.075	1.004	0.911	NA	NA	NA	NA	NA	NA	NA
SPBC2A9.11c	1.083	0.979	0.717	0.577	0.943	0.593	0.893	1.063	0.788	NA	NA	NA	NA	NA	NA	NA
SPBC365.07c	1.083	1.016	1.111	0.998	0.917	0.83	1.027	0.99	0.968	NA	NA	NA	NA	NA	NA	NA
SPBP8B7.04	1.083	1.011	1.02	0.987	1.024	0.979	1.013	1.1	1.042	NA	NA	NA	NA	NA	NA	NA
SPCC1682.12c	1.083	1.05	1.203	0.995	1.044	1.107	1.366	0.994	1.432	NA	NA	NA	NA	NA	NA	NA
SPCC622.16c	1.083	1.08	0.834	1.033	1.118	0.847	0.871	1.165	1.134	NA	NA	NA	NA	NA	NA	NA
SPBC16D10.02	1.082	1.085	1.042	0.97	1.073	1.018	1.054	1.155	1.188	NA	NA	NA	NA	NA	NA	1
SPAC13G7.05	1.082	1.135	1.235	1.067	1.187	1.227	0.924	1.048	1.376	NA	NA	NA	NA	NA	NA	NA
SPAC16E8.12c	1.082	0.978	0.984	1.05	0.991	1.037	0.929	1.052	0.971	NA	NA	NA	NA	NA	NA	NA
SPAC1834.07	1.082	1.038	1.111	0.952	1.061	0.912	1.068	1.188	1.354	NA	NA	NA	NA	NA	NA	NA
SPAC824.07	1.082	1.125	1.087	0.942	1.059	0.898	1.112	1.04	1.018	NA	NA	NA	NA	NA	NA	NA
SPAPJ696.01c	1.082	1.075	1.127	1.218	1.03	1.283	1.059	1.02	1.214	NA	NA	NA	NA	NA	NA	NA
SPCPB16A4.04c	1.081	1.063	1.112	0.97	1.018	1.013	1.138	1.157	1.094	NA	NA	NA	NA	NA	NA	1
SPAC2H10.02c	1.081	1.267	1.148	0.93	1.022	0.801	0.949	1.041	1.241	NA	NA	NA	NA	NA	NA	NA
SPAC4F10.17	1.081	1.022	1.023	1.001	1.024	0.99	0.965	0.975	0.958	NA	NA	NA	NA	NA	NA	NA
SPAC6C3.03c	1.081	0.984	1.01	0.895	1.019	1.068	0.864	1.165	1.214	NA	NA	NA	NA	NA	NA	NA
SPACUNK4.09	1.081	0.999	1.037	1.025	0.962	1.007	0.97	0.935	0.952	NA	NA	NA	NA	NA	NA	NA
SPAC32A11.01	1.08	1.043	1.065	1.125	1.074	1.06	1.05	1.019	1.035	NA	NA	NA	NA	NA	NA	NA
SPAC688.14	1.08	1.079	0.997	1.027	1.047	0.909	0.998	0.955	0.858	NA	NA	NA	NA	NA	NA	NA
SPAP8A3.13c	1.08	1.111	1.067	1.131	1.195	1.208	1.036	1.033	1.208	NA	NA	NA	NA	NA	NA	NA
SPBC1778.04	1.08	1.02	1.025	1.083	1.034	1.058	1.03	0.987	1.004	NA	NA	NA	NA	NA	NA	NA
SPBC29A10.14	1.08	1.089	1.1	1.165	1.075	0.903	0.991	1.099	0.992	NA	NA	NA	NA	NA	NA	NA
SPBC32F12.05c	1.08	1.071	1.427	1.176	1.194	1.395	1.205	1.272	1.439	NA	NA	NA	NA	NA	NA	NA
SPBC660.14	1.08	1.053	1.004	1.132	1.081	1.18	1.058	1.082	1.024	NA	NA	NA	NA	NA	NA	NA
SPCC18.17c	1.08	1.057	1.017	1.024	1.109	0.955	0.991	1.021	0.915	NA	NA	NA	NA	NA	NA	NA
SPAC3A11.04	1.079	1.044	1.183	1.268	1.125	1.25	1.1	1.055	1.186	NA	NA	NA	NA	NA	NA	NA
SPAC3C7.07c	1.079	1.046	1.051	0.999	1.045	1.026	1.114	0.964	0.839	NA	NA	NA	NA	NA	NA	NA
SPAC664.15	1.079	1.024	0.897	0.953	1.033	0.953	0.89	0.985	0.811	NA	NA	NA	NA	NA	NA	NA
SPBC25B2.02c	1.079	0.964	1.043	0.928	0.966	0.937	0.981	0.985	0.932	NA	NA	NA	NA	NA	NA	NA
SPAC1002.03c	1.078	1.03	1.033	1.115	1.109	1.082	0.966	1.001	1.108	NA	NA	NA	NA	NA	NA	NA
SPAC14C4.15c	1.078	1.189	0.929	1.134	1.283	1.147	0.858	1.132	1.07	NA	NA	NA	NA	NA	NA	NA
SPBC32F12.02	1.078	1.097	1.249	0.762	1.002	1.076	1.277	1.027	1.061	NA	NA	NA	NA	NA	NA	NA
SPAC3C7.13c	1.077	1.032	1.036	0.97	0.906	0.887	1.066	0.917	0.866	NA	NA	NA	NA	NA	NA	NA
SPBC21C3.09c	1.077	1.052	0.974	1.032	1.102	1.046	0.998	0.952	0.945	NA	NA	NA	NA	NA	NA	NA
SPCC777.03c	1.077	1.046	0.944	1.038	1.103	1.024	0.947	1.01	0.974	NA	NA	NA	NA	NA	NA	NA
SPAC3H5.12c	1.076	1.079	1.269	1.283	1.122	1.163	1.24	1.65	1.667	NA	NA	NA	NA	NA	NA	1
SPAC57A7.13	1.076	1.071	1.043	1.038	1.078	1.011	1.063	1.053	1.076	NA	NA	NA	NA	NA	NA	1
SPAC1F5.09c	1.076	1.089	1.111	1.031	1.073	0.883	0.974	0.962	0.926	NA	NA	NA	NA	NA	NA	NA
SPAC4A8.06c	1.076	1.062	0.882	1.022	1.038	0.88	0.896	1.044	0.901	NA	NA	NA	NA	NA	NA	NA
SPAC6C3.08	1.076	1.076	1.276	1.179	1.113	1.059	1.068	1.058	1.397	NA	NA	NA	NA	NA	NA	NA
SPBP35G2.08c	1.076	0.999	0.697	0.554	0.991	0.532	0.672	1.243	1.126	NA	NA	NA	NA	NA	NA	NA
SPCC1020.09	1.076	1.002	1.052	0.927	0.948	0.918	1.114	0.989	0.922	NA	NA	NA	NA	NA	NA	NA
SPAC1142.03c	1.075	1.053	0.993	1.079	1.057	1.001	0.967	1.184	1.071	NA	NA	NA	NA	NA	NA	NA
SPBC1685.06	1.075	0.975	1.33	0.968	0.947	1.051	1.151	1.25	1.819	NA	NA	NA	NA	NA	NA	NA
SPCC11E10.05c	1.075	0.994	0.961	1.006	1.024	0.965	0.95	1.029	1.05	NA	NA	NA	NA	NA	NA	NA
SPCC24B10.20	1.075	1.027	0.953	1.049	1.088	1.083	0.953	1.071	0.904	NA	NA	NA	NA	NA	NA	NA
SPAC1B3.02c	1.074	1.043	1.179	1.203	1.105	1.175	1.112	1.109	1.011	NA	NA	NA	NA	NA	NA	NA
SPAC26F1.09	1.074	1.08	1.074	1.062	1.071	1.117	1.141	1.104	1.303	NA	NA	NA	NA	NA	NA	NA
SPBC1105.04c	1.074	1.068	1.093	0.968	1.01	0.901	1.065	1.476	1.693	NA	NA	NA	NA	NA	NA	NA
SPBC14C8.17c	1.074	0.702	2.079	1.539	0.463	1.595	2.014	1.008	1.928	NA	NA	NA	NA	NA	NA	NA
SPBC2D10.17	1.074	1.061	1.132	0.994	1.065	1.09	1.04	0.981	1.102	NA	NA	NA	NA	NA	NA	NA
SPBC3H7.06c	1.074	0.958	0.945	0.943	0.951	0.944	0.925	0.993	0.854	NA	NA	NA	NA	NA	NA	NA
SPAC19G12.02c	1.073	1.085	1.138	1.046	1.008	1.059	0.939	1.201	1.058	NA	NA	NA	NA	NA	NA	NA
SPAC25B8.08	1.073	1.016	1.036	0.982	0.98	0.989	1.041	1.047	0.952	NA	NA	NA	NA	NA	NA	NA
SPAC8C9.06c	1.073	1.052	1.007	1.026	1.067	1.005	1.078	1.296	1.138	NA	NA	NA	NA	NA	NA	NA
SPBC14C8.11c	1.073	1.016	0.972	0.93	0.942	0.934	0.999	1.008	0.854	NA	NA	NA	NA	NA	NA	NA
SPBC1703.06	1.073	1.01	1.082	0.918	0.982	0.936	1.121	0.961	0.908	NA	NA	NA	NA	NA	NA	NA
SPBC1A4.05	1.073	1.102	0.855	0.972	1.07	0.937	1.025	1.008	0.808	NA	NA	NA	NA	NA	NA	NA
SPBC83.19c	1.073	0.999	0.941	1.073	1.108	1.112	0.933	0.987	1.058	NA	NA	NA	NA	NA	NA	NA
SPBP8B7.27	1.073	0.991	0.982	1.009	1.014	1.071	1.03	1.076	1.023	NA	NA	NA	NA	NA	NA	NA
SPAC27D7.03c	1.072	0.901	0.972	0.935	0.975	0.884	0.987	0.85	0.942	NA	NA	NA	NA	NA	NA	1
SPAC1B3.05	1.072	1.026	1.055	1.003	1.012	0.896	1.077	0.638	0.619	NA	1	NA	1	NA	NA	NA
SPAC1F12.07	1.072	0.922	0.735	0.575	0.959	0.505	0.79	1.666	1.896	NA	NA	NA	NA	NA	NA	NA
SPAC8F11.05c	1.072	0.998	1.044	0.95	0.989	0.923	1.094	0.995	0.861	NA	NA	NA	NA	NA	NA	NA
SPBC15C4.04c	1.072	1.152	0.991	0.985	1.188	1.002	0.904	0.908	1.302	NA	NA	NA	NA	NA	NA	NA
SPBC23G7.13c	1.072	0.999	1.096	0.991	1.029	1.057	1.106	0.961	0.9	NA	NA	NA	NA	NA	NA	NA
SPBC31F10.05	1.072	1.002	0.919	0.972	1.083	1.032	0.764	1.079	1.078	NA	NA	NA	NA	NA	NA	NA
SPCC1620.02	1.072	0.981	1.046	1.034	1.045	1.036	1.015	0.995	1.399	NA	NA	NA	NA	NA	NA	NA
SPCC1682.15	1.072	0.896	0.967	0.97	0.919	0.892	0.922	0.83	0.951	NA	NA	NA	NA	NA	NA	NA
SPBC18H10.20c	1.071	1.079	0.927	1.043	1.106	1.054	0.934	1.026	0.906	NA	NA	NA	NA	NA	NA	NA
SPBC25H2.09	1.071	1.054	0.749	0.813	0.992	0.83	0.78	0.734	0.575	NA	1	NA	NA	1	NA	NA
SPBC800.03	1.071	1.023	1.086	0.923	1.018	0.911	1.12	1.095	1.04	NA	NA	NA	NA	NA	NA	NA
SPAC17A2.14	1.07	1.028	0.841	1.003	1.124	0.969	0.934	1.027	0.876	NA	NA	NA	NA	NA	NA	NA
SPAC1B1.04c	1.07	0.908	1.059	1.105	0.895	1.152	1.005	0.868	0.956	NA	NA	NA	NA	NA	NA	NA
SPAC323.03c	1.07	1.081	0.829	1.173	1.072	1.07	0.946	0.862	0.856	NA	NA	NA	NA	NA	NA	NA
SPAC4D7.11	1.07	0.936	0.849	0.822	1.095	0.941	0.933	1.017	1.148	NA	NA	NA	NA	NA	NA	NA
SPAC8F11.09c	1.07	1.031	1.024	1.081	1.078	1.148	1.012	1.173	0.955	NA	NA	NA	NA	NA	NA	NA
SPAC9E9.03	1.07	1.199	0.978	1.116	1.214	1.181	1.133	0.996	0.893	NA	NA	NA	NA	NA	NA	NA
SPBC359.01	1.07	1.143	0.986	1.11	1.183	1.129	1.04	0.989	1.021	NA	NA	NA	NA	NA	NA	NA
SPBC359.05	1.07	1.029	0.984	1.062	1.03	0.962	0.996	0.929	0.842	NA	NA	NA	NA	NA	NA	NA
SPCC191.06	1.07	1.044	1.007	0.984	1.045	1.044	0.982	1.055	0.909	NA	NA	NA	NA	NA	NA	NA
SPBC2G5.03	1.069	1.103	0.836	0.796	0.872	0.738	0.761	1.205	1.238	NA	NA	NA	NA	NA	NA	1
SPAC17A5.02c	1.069	1.056	0.996	1.153	1.073	1.105	0.98	1.084	1.351	NA	NA	NA	NA	NA	NA	NA
SPAC1851.03	1.069	1.075	0.907	0.938	1.063	0.929	0.991	1.644	1.39	NA	NA	NA	NA	NA	NA	NA
SPAC1B3.06c	1.069	1.045	0.957	1.012	1.04	1.018	0.961	1.05	0.959	NA	NA	NA	NA	NA	NA	NA
SPAC1F3.03	1.069	1.038	1.214	1.114	1.036	1.173	1.084	1.036	1.044	NA	NA	NA	NA	NA	NA	NA
SPAC31A2.02	1.069	1.034	1.041	0.836	0.987	0.967	1.103	1.887	1.775	NA	NA	NA	NA	NA	NA	NA
SPAC6G9.09c	1.068	1.104	1.106	0.976	1.062	1.029	1.028	0.97	0.902	NA	NA	NA	NA	NA	NA	1
SPAC13G6.14	1.068	1.081	0.728	0.752	1.096	0.709	0.758	0.67	0.847	NA	1	NA	1	NA	NA	NA
SPAC1834.05	1.068	1.039	1.244	1.378	1.02	1.099	1.142	1.087	1.355	NA	NA	NA	NA	NA	NA	NA
SPAC24C9.14	1.068	1.038	0.812	0.731	1.052	0.897	0.875	1.077	0.954	NA	NA	NA	NA	NA	NA	NA
SPAC29E6.07	1.068	1.045	1.01	1.181	1.135	1.176	1.022	1.034	1.021	NA	NA	NA	NA	NA	NA	NA
SPAC3G9.07c	1.068	0.983	1.266	1.055	0.855	0.946	1.263	0.694	1.099	NA	NA	NA	NA	NA	NA	NA
SPAC57A7.05	1.068	1.025	1.044	0.963	1.002	0.88	0.938	0.934	0.835	NA	NA	NA	NA	NA	NA	NA
SPAC5D6.02c	1.068	0.962	0.999	0.984	1.007	1.047	0.931	1.313	1.115	NA	NA	NA	NA	NA	NA	NA
SPBC902.05c	1.068	0.895	1.086	0.954	0.934	0.903	0.983	0.929	1.548	NA	NA	NA	NA	NA	NA	NA
SPAC13G6.01c	1.067	1.097	0.983	1.153	1.124	1.078	0.994	1.05	0.911	NA	NA	NA	NA	NA	NA	NA
SPAC144.17c	1.067	1.077	0.881	0.935	1.049	0.969	1.013	1.006	0.807	NA	NA	NA	NA	NA	NA	NA
SPAC1786.02	1.067	0.997	0.941	1.11	1.077	1.028	1.009	1.04	1.086	NA	NA	NA	NA	NA	NA	NA
SPAC12B10.13	1.066	0.997	0.973	0.952	1.012	0.923	0.98	1.027	1.163	NA	NA	NA	NA	NA	NA	NA
SPAC17G8.10c	1.066	1.025	1.104	1.01	1.025	1.009	0.955	0.961	1.083	NA	NA	NA	NA	NA	NA	NA
SPBC543.08	1.066	1.076	1.142	1.02	1.069	0.984	1.173	1.03	0.996	NA	NA	NA	NA	NA	NA	NA
SPCC14G10.03c	1.066	1.072	1.013	1.13	1.078	1.117	0.984	1.175	2.089	NA	NA	NA	NA	NA	NA	NA
SPAC23G3.05c	1.065	1.09	0.995	1.129	1.184	1.142	0.946	1.21	1.112	NA	NA	NA	NA	NA	NA	NA
SPBC16D10.05	1.065	1	1.014	1.012	1.033	1.001	0.978	0.869	0.832	NA	NA	NA	NA	NA	NA	NA
SPBC21C3.18	1.065	0.987	1.16	0.921	0.926	0.961	1	1.011	1.202	NA	NA	NA	NA	NA	NA	NA
SPBC30D10.18c	1.065	1.008	0.973	0.902	1.066	1.177	1.019	1.07	1.275	NA	NA	NA	NA	NA	NA	NA
SPCC777.08c	1.065	1.023	1.09	1.128	1.047	1.138	0.991	1.232	0.953	NA	NA	NA	NA	NA	NA	NA
SPAC25B8.15c	1.064	1.04	0.928	1.102	0.886	0.934	0.907	0.936	1.019	NA	NA	NA	NA	NA	NA	NA
SPBC17G9.02c	1.064	1.065	1.085	1.165	1.125	1.102	1.029	1.524	1.168	NA	NA	NA	NA	NA	NA	NA
SPCC965.11c	1.064	1.046	0.997	0.939	0.941	0.906	0.978	0.961	0.911	NA	NA	NA	NA	NA	NA	NA
SPAC222.16c	1.063	0.961	1.048	1.196	0.966	0.936	0.823	0.879	0.948	NA	NA	NA	NA	NA	NA	NA
SPAC890.07c	1.063	1.089	0.804	0.844	1.103	0.825	0.832	1.1	0.916	NA	NA	NA	NA	NA	NA	NA
SPAC9E9.12c	1.063	1.031	1.093	1.001	1.086	0.982	1.016	1.003	0.985	NA	NA	NA	NA	NA	NA	NA
SPBC15D4.10c	1.063	0.962	0.959	0.902	0.989	0.974	0.951	0.991	0.939	NA	NA	NA	NA	NA	NA	NA
SPBC1778.10c	1.063	1.075	1.002	0.94	1.055	0.783	0.978	1.081	1.376	NA	NA	NA	NA	NA	NA	NA
SPBP35G2.10	1.063	0.991	1.017	1.001	1.039	1.02	0.991	1.226	1.301	NA	NA	NA	NA	NA	NA	NA
SPCC16A11.08	1.063	1.009	1.015	0.961	0.998	0.883	0.949	0.956	0.884	NA	NA	NA	NA	NA	NA	NA
SPAC1782.09c	1.062	0.953	1.296	1.063	0.969	1.097	1.085	1.045	1.379	NA	NA	NA	NA	NA	NA	NA
SPAC23C11.10	1.062	1.001	1.156	0.964	0.948	0.972	1.132	1.149	1.358	NA	NA	NA	NA	NA	NA	NA
SPAC926.03	1.062	0.675	0.964	0.663	0.624	0.422	0.955	1.219	0.999	NA	NA	NA	NA	NA	NA	NA
SPBC1685.11	1.062	1.083	0.997	1.01	1.075	0.977	1.025	0.972	0.953	NA	NA	NA	NA	NA	NA	NA
SPBC409.17c	1.062	0.954	1.148	0.95	0.921	0.982	1.074	0.99	1.143	NA	NA	NA	NA	NA	NA	NA
SPCC1235.05c	1.062	1.04	0.816	0.915	1.105	1.189	0.912	1.042	1.026	NA	NA	NA	NA	NA	NA	NA
SPAC1002.02	1.061	0.979	1.07	0.981	0.943	1.004	1.061	0.997	0.919	NA	NA	NA	NA	NA	NA	NA
SPAC25H1.02	1.061	1.043	0.957	1.083	1.107	1.145	1.001	1.025	1.138	NA	NA	NA	NA	NA	NA	NA
SPAC869.03c	1.061	1.007	0.986	1.002	1.079	1.002	1.011	1.014	0.937	NA	NA	NA	NA	NA	NA	NA
SPBC1711.12	1.061	1.038	1.023	0.968	1.03	0.929	1.034	0.896	0.858	NA	NA	NA	NA	NA	NA	NA
SPBC17A3.10	1.061	1.238	1.089	0.951	1.157	0.98	1.081	1.154	1.119	NA	NA	NA	NA	NA	NA	NA
SPBC2G2.13c	1.061	0.999	1	1.023	0.992	1.001	1	0.943	0.867	NA	NA	NA	NA	NA	NA	NA
SPCC285.14	1.061	0.987	1.086	1.072	1.02	1.049	1.008	2.352	1.954	NA	NA	NA	NA	NA	NA	NA
SPAC513.02	1.06	1.09	1.044	1.101	1.073	1.022	1.029	1.005	0.908	NA	NA	NA	NA	NA	NA	NA
SPBC14C8.03	1.06	1.023	1.14	1	1.038	0.95	1.116	1.021	1.053	NA	NA	NA	NA	NA	NA	NA
SPBC354.01	1.06	0.976	1.062	0.974	1.037	1.033	1.051	1.037	1.011	NA	NA	NA	NA	NA	NA	NA
SPCC23B6.03c	1.06	0.971	1.101	0.921	0.911	0.94	0.992	0.987	1.355	NA	NA	NA	NA	NA	NA	NA
SPCC613.01	1.06	1.009	1.012	0.928	0.961	1.091	1.064	0.88	0.915	NA	NA	NA	NA	NA	NA	NA
SPAC25B8.18	1.059	1.025	1.114	1.149	1.018	1.161	1.103	0.662	0.71	NA	NA	NA	NA	NA	NA	NA
SPAC29A4.20	1.059	0.989	0.98	0.997	0.942	1.176	1.021	0.876	1.123	NA	NA	NA	NA	NA	NA	NA
SPBC1105.10	1.059	1.181	1.068	1.155	1.315	1.162	1.106	1.26	1.049	NA	NA	NA	NA	NA	NA	NA
SPBC14C8.09c	1.059	0.998	1.022	0.989	0.99	0.939	1.027	1.012	0.843	NA	NA	NA	NA	NA	NA	NA
SPBC25H2.08c	1.059	0.946	0.966	1.098	1.069	1.042	0.949	0.915	0.968	NA	NA	NA	NA	NA	NA	NA
SPBC405.03c	1.059	1.071	1.062	1.027	1.046	1.003	1.069	0.975	0.956	NA	NA	NA	NA	NA	NA	NA
SPCC16C4.01	1.059	0.931	1.007	0.924	0.945	0.96	0.773	1.027	1.211	NA	NA	NA	NA	NA	NA	NA
SPCC1840.08c	1.059	1.004	1.063	1.054	1.018	1.038	0.987	1.017	0.968	NA	NA	NA	NA	NA	NA	NA
SPCC569.05c	1.059	1.024	1.002	0.99	1.072	0.957	0.965	0.988	0.962	NA	NA	NA	NA	NA	NA	NA
SPAC12B10.03	1.058	1.065	1.048	0.921	1.009	0.853	0.819	0.5	0.532	NA	1	NA	1	NA	NA	NA
SPAC343.12	1.058	1.001	1.043	1.005	1.024	0.959	1.021	1.006	0.959	NA	NA	NA	NA	NA	NA	NA
SPAC7D4.08	1.058	1.082	1.008	1.118	1.063	1.168	0.953	0.894	0.994	NA	NA	NA	NA	NA	NA	NA
SPAC823.05c	1.058	1.059	1.132	1.393	1.114	1.325	1.078	1.645	1.726	NA	NA	NA	NA	NA	NA	NA
SPAC8C9.04	1.058	0.998	0.945	0.904	0.972	0.847	0.947	0.964	0.852	NA	NA	NA	NA	NA	NA	NA
SPAC1A6.03c	1.057	1.05	1.035	1	1.03	0.908	1.028	1.007	0.938	NA	NA	NA	NA	NA	NA	NA
SPAC26H5.02c	1.057	1.009	0.983	1	1.038	0.966	0.999	1.009	0.898	NA	NA	NA	NA	NA	NA	NA
SPAC57A10.08c	1.057	1.006	1.091	1.019	0.985	1.081	1.046	1.136	1.493	NA	NA	NA	NA	NA	NA	NA
SPAC637.10c	1.057	1	1.096	0.863	0.889	0.812	1.098	1.18	1.26	NA	NA	NA	NA	NA	NA	NA
SPBC1734.09	1.057	1.034	1.096	1.044	1.02	1.057	1.132	0.974	0.927	NA	NA	NA	NA	NA	NA	NA
SPBC56F2.06	1.057	1.001	1.006	1.014	0.99	0.925	1.03	0.935	0.88	NA	NA	NA	NA	NA	NA	NA
SPCC1827.02c	1.057	1.079	0.845	0.971	1.117	1.011	0.877	1.115	1.014	NA	NA	NA	NA	NA	NA	NA
SPCC757.02c	1.057	1.056	1.054	1.073	1.104	1.089	1.031	1.039	0.987	NA	NA	NA	NA	NA	NA	NA
SPAC11E3.09	1.056	1.049	1.051	1.09	1.07	1.064	1.026	1.117	1.037	NA	NA	NA	NA	NA	NA	NA
SPAC1B3.07c	1.056	1.013	1.335	1.185	1.041	1.348	0.941	1.03	1.317	NA	NA	NA	NA	NA	NA	NA
SPBC16A3.16	1.056	1.018	0.841	0.956	1.062	0.97	0.791	0.862	0.813	NA	NA	NA	NA	NA	NA	NA
SPBC21D10.08c	1.056	1.105	1.083	1.1	1.093	1.06	1.04	1.117	1.103	NA	NA	NA	NA	NA	NA	NA
SPBC342.01c	1.056	1.067	1	1.258	1.101	1.247	0.984	1.06	1.64	NA	NA	NA	NA	NA	NA	NA
SPBC418.01c	1.056	1.027	0.944	0.917	1.001	0.914	1.009	0.893	0.8	NA	NA	NA	NA	NA	NA	NA
SPCC1322.07c	1.056	1.046	0.953	1.009	1.121	1.006	0.989	1	0.951	NA	NA	NA	NA	NA	NA	NA
SPCC162.10	1.056	1.115	1.17	0.916	1.021	1.021	1.082	1.019	1.285	NA	NA	NA	NA	NA	NA	NA
SPAC19G12.04	1.055	1.005	1.089	1.033	1.01	1.092	1.025	1.05	1.064	NA	NA	NA	NA	NA	NA	NA
SPAC1A6.01c	1.055	1.058	1.093	1.056	0.977	1.026	0.994	1.166	1.053	NA	NA	NA	NA	NA	NA	NA
SPAC212.03	1.055	1.004	1.13	1.011	1.022	1.003	0.979	0.984	0.911	NA	NA	NA	NA	NA	NA	NA
SPAC22G7.11c	1.055	0.978	0.97	0.919	0.913	0.952	1.048	1.106	0.949	NA	NA	NA	NA	NA	NA	NA
SPAC23C4.06c	1.055	1.026	1.043	1.029	0.988	0.977	1.043	0.613	0.698	NA	1	NA	1	NA	NA	NA
SPAPB1A11.03	1.055	1.017	0.976	0.952	0.974	0.926	0.971	1.009	0.974	NA	NA	NA	NA	NA	NA	NA
SPBC3B9.15c	1.055	1.082	1.087	1.086	1.069	1.054	1.125	1.068	1.009	NA	NA	NA	NA	NA	NA	NA
SPBP8B7.07c	1.055	1.005	0.979	0.927	0.988	0.792	0.852	0.887	0.851	NA	NA	NA	NA	NA	NA	NA
SPCC338.06c	1.055	0.986	1.051	1.049	0.99	0.983	1.008	0.99	0.938	NA	NA	NA	NA	NA	NA	NA
SPAC1039.09	1.054	1.046	1.119	1.121	1.019	1.15	1.127	0.973	0.883	NA	NA	NA	NA	NA	NA	NA
SPAC3C7.10	1.054	1.123	0.813	1.01	1.081	0.94	0.928	0.874	0.851	NA	NA	NA	NA	NA	NA	NA
SPAPB2B4.04c	1.054	0.846	1.146	1.051	0.971	0.988	0.998	0.941	1.098	NA	NA	NA	NA	NA	NA	NA
SPBC19G7.02	1.054	1.024	1.07	0.97	0.962	0.937	1.073	1.119	1.212	NA	NA	NA	NA	NA	NA	NA
SPBC29A10.07	1.054	0.938	0.961	0.963	0.935	0.931	0.916	0.856	0.893	NA	NA	NA	NA	NA	NA	NA
SPCC1672.12c	1.054	1.001	0.948	1.001	1.009	1.02	0.907	0.832	1.043	NA	NA	NA	NA	NA	NA	NA
SPCC1739.01	1.054	0.993	1.114	1.029	1.028	1.019	0.944	0.857	1.724	NA	NA	NA	NA	NA	NA	NA
SPCC24B10.22	1.054	1.006	1.066	1.005	1.009	0.91	1	0.972	1.05	NA	NA	NA	NA	NA	NA	NA
SPCC895.07	1.054	1.054	1.063	1.024	1.032	1.013	1.011	1.239	0.972	NA	NA	NA	NA	NA	NA	NA
SPAC1093.06c	1.053	1.021	1.051	1.045	1.003	0.975	1.002	0.97	0.886	NA	NA	NA	NA	NA	NA	NA
SPAC630.05	1.053	1.105	0.939	0.866	1.171	0.979	1.039	0.975	0.889	NA	NA	NA	NA	NA	NA	NA
SPBC119.14	1.053	0.992	1.021	1.008	1.022	0.997	0.979	1.1	1.098	NA	NA	NA	NA	NA	NA	NA
SPBC15D4.15	1.053	1.026	0.94	0.838	0.999	0.904	1.037	1.013	0.81	NA	NA	NA	NA	NA	NA	NA
SPBC21B10.04c	1.053	1.011	1.025	1.033	1.016	0.967	1.015	0.945	0.992	NA	NA	NA	NA	NA	NA	NA
SPBC337.03	1.053	0.976	0.982	1.254	0.976	0.864	0.921	1.16	1.068	NA	NA	NA	NA	NA	NA	NA
SPBC28E12.02	1.052	1.037	1.049	0.972	1.011	1.011	1.049	0.921	0.896	NA	NA	NA	NA	NA	NA	1
SPBC3B9.11c	1.052	0.949	0.954	0.986	0.901	0.662	0.778	1.041	1.031	NA	NA	NA	NA	NA	NA	1
SPAC17A2.01	1.052	1.07	1.142	1.223	1.092	1.205	0.98	1.053	1.035	NA	NA	NA	NA	NA	NA	NA
SPAC212.02	1.052	1.028	0.993	1.009	1.019	0.998	1.03	1.053	0.974	NA	NA	NA	NA	NA	NA	NA
SPAC22F8.04	1.052	0.871	1.052	0.952	0.917	1.059	1.012	0.829	0.949	NA	NA	NA	NA	NA	NA	NA
SPBC29A10.11c	1.052	0.972	0.998	1.05	0.986	1.053	0.93	1.05	0.977	NA	NA	NA	NA	NA	NA	NA
SPBC2D10.20	1.052	1.028	1.108	1.169	1.019	1.107	1.003	0.99	1.164	NA	NA	NA	NA	NA	NA	NA
SPBC530.06c	1.052	1.176	1.016	1.138	1.163	1.134	1.007	1.014	0.856	NA	NA	NA	NA	NA	NA	NA
SPAC1002.07c	1.051	0.953	0.958	0.984	0.956	1.041	0.928	0.957	0.915	NA	NA	NA	NA	NA	NA	NA
SPAC19B12.11c	1.051	0.966	1.252	0.822	0.933	1.123	1.173	1.181	1.107	NA	NA	NA	NA	NA	NA	NA
SPAC27D7.13c	1.051	0.958	1.013	0.924	0.893	0.908	0.984	0.925	0.871	NA	NA	NA	NA	NA	NA	NA
SPAC3G6.02	1.051	0.888	1.045	0.995	1.062	1.138	1.047	1.479	2.086	NA	NA	NA	NA	NA	NA	NA
SPBC1703.11	1.051	1.046	1.023	1.098	1.028	1.037	1.014	1.016	0.958	NA	NA	NA	NA	NA	NA	NA
SPBC23G7.12c	1.051	1.049	1.043	1.06	1.066	1.185	1.119	1.938	1.002	NA	NA	NA	NA	NA	NA	NA
SPBC337.16	1.051	0.895	1.021	0.719	0.76	0.547	0.908	1.035	1.089	NA	NA	NA	NA	NA	NA	NA
SPBC365.12c	1.051	1.188	0.887	1.204	1.229	1.249	0.955	1.16	1.12	NA	NA	NA	NA	NA	NA	NA
SPBC776.15c	1.051	1.213	0.872	0.977	1.24	1.059	0.968	1.002	1.164	NA	NA	NA	NA	NA	NA	NA
SPCC70.08c	1.051	1.03	1.049	1.068	1.007	1.007	1.007	0.94	1.016	NA	NA	NA	NA	NA	NA	NA
SPAC328.05	1.05	0.993	0.988	1.048	0.992	0.959	0.998	0.996	0.958	NA	NA	NA	NA	NA	NA	1
SPAC13D6.01	1.05	1.001	0.996	0.978	0.987	0.94	0.993	1.074	0.964	NA	NA	NA	NA	NA	NA	NA
SPAC15A10.07	1.05	0.898	0.999	1.075	0.907	1.103	0.92	1.017	1.037	NA	NA	NA	NA	NA	NA	NA
SPAC1A6.06c	1.05	0.923	1.09	1.022	0.962	0.911	1.055	0.975	1.023	NA	NA	NA	NA	NA	NA	NA
SPAC926.06c	1.05	1.131	1.049	1.048	1.084	1.04	0.977	0.961	0.897	NA	NA	NA	NA	NA	NA	NA
SPBC1861.02	1.05	1.093	1.12	0.954	1.036	0.959	1.079	0.837	0.835	NA	NA	NA	NA	NA	NA	NA
SPBC21B10.12	1.05	0.959	1.077	1.017	0.951	1.041	0.996	0.955	1.031	NA	NA	NA	NA	NA	NA	NA
SPCC1235.01	1.05	0.98	0.971	1.075	1.01	1.079	0.984	0.953	1.208	NA	NA	NA	NA	NA	NA	NA
SPCC777.15	1.05	1.135	1.366	1.283	1.198	1.441	1.193	0.838	1.038	NA	NA	NA	NA	NA	NA	NA
SPAC664.01c	1.049	0.987	1.049	1.031	1.013	1.027	1.01	0.916	0.88	NA	NA	NA	NA	NA	NA	1
SPAC22A12.06c	1.049	1.026	1.038	1.064	1.025	0.969	0.997	0.979	0.929	NA	NA	NA	NA	NA	NA	NA
SPAC3F10.11c	1.049	1.036	1.063	1.026	0.991	0.95	1.017	1.013	0.982	NA	NA	NA	NA	NA	NA	NA
SPAP8A3.02c	1.049	1.114	1.081	1.131	1.193	1.124	0.997	1.069	0.998	NA	NA	NA	NA	NA	NA	NA
SPBC11C11.07	1.049	1.137	1.213	1.11	1.127	1.123	1.171	2.544	2.21	NA	NA	NA	NA	NA	NA	NA
SPBC17G9.12c	1.049	1.042	0.999	0.953	1.062	1.044	1.064	0.914	0.841	NA	NA	NA	NA	NA	NA	NA
SPBC19C2.04c	1.049	1.015	0.954	0.9	1.015	0.946	1.029	0.984	0.813	NA	NA	NA	NA	NA	NA	NA
SPAC11H11.04	1.048	1.104	1.052	1.153	1.119	1.119	0.972	1.03	1.179	NA	NA	NA	NA	NA	NA	NA
SPAC16.04	1.048	1.032	1.033	0.907	1.038	0.941	1.002	1.123	1.227	NA	NA	NA	NA	NA	NA	NA
SPAC1687.16c	1.048	1.011	1.045	0.982	1.019	1.001	1.057	1.028	0.981	NA	NA	NA	NA	NA	NA	NA
SPAC17A2.07c	1.048	1.041	0.968	1.118	1.113	1.168	0.961	0.942	1.044	NA	NA	NA	NA	NA	NA	NA
SPAC19A8.11c	1.048	1.076	0.973	1.106	1.067	1.066	0.965	1.356	1.416	NA	NA	NA	NA	NA	NA	NA
SPAC6F12.12	1.048	0.962	1.138	1.202	1.037	1.117	1.038	1.043	1.201	NA	NA	NA	NA	NA	NA	NA
SPAC806.08c	1.048	1.009	0.915	1.045	1.079	1.123	0.944	1.082	0.9	NA	NA	NA	NA	NA	NA	NA
SPBC30D10.03c	1.048	1.117	0.962	0.906	1.009	0.817	1.03	1.014	0.817	NA	NA	NA	NA	NA	NA	NA
SPBC337.04	1.048	1.07	0.833	0.917	1.052	0.852	0.881	1.045	0.757	NA	NA	NA	NA	NA	NA	NA
SPBP22H7.04	1.048	1.034	0.967	0.997	1.013	1.008	1.006	0.951	0.862	NA	NA	NA	NA	NA	NA	NA
SPAC10F6.15	1.047	1.125	1.092	1.16	1.152	1.171	0.931	1.162	1.098	NA	NA	NA	NA	NA	NA	NA
SPAC11E3.05	1.047	1.011	0.998	1.065	1.061	1.013	1	2.693	2.021	NA	NA	NA	NA	NA	NA	NA
SPAC144.05	1.047	1.019	1.059	1.138	1.075	1.141	1.024	0.959	1.061	NA	NA	NA	NA	NA	NA	NA
SPAC17G8.14c	1.047	1.008	1.024	1.092	1.007	1.126	1.049	0.958	0.848	NA	NA	NA	NA	NA	NA	NA
SPAC1B3.10c	1.047	1.06	1.226	1.048	1.041	0.733	1.118	0.96	0.926	NA	NA	NA	NA	NA	NA	NA
SPAC25B8.09	1.047	0.904	0.829	0.97	0.972	0.883	0.901	0.809	1.008	NA	NA	NA	NA	NA	NA	NA
SPAC26F1.10c	1.047	0.926	0.99	1.195	0.816	0.946	0.929	1.17	1.461	NA	NA	NA	NA	NA	NA	NA
SPAC4G9.14	1.047	0.993	1.162	1.276	1.02	1.072	1.065	0.95	1.451	NA	NA	NA	NA	NA	NA	NA
SPAC631.02	1.047	1.032	0.961	1.019	1.084	0.993	0.985	1.25	1.387	NA	NA	NA	NA	NA	NA	NA
SPAC6C3.07	1.047	1.004	1.263	0.932	1.033	1.126	1.04	0.945	1.56	NA	NA	NA	NA	NA	NA	NA
SPBC1718.03	1.047	0.946	1.586	1.174	0.755	0.978	1.377	1.888	2	NA	NA	NA	NA	NA	NA	NA
SPBC27B12.14	1.047	0.976	0.995	1.135	1.041	1.219	0.991	0.982	1.179	NA	NA	NA	NA	NA	NA	NA
SPBC2G2.09c	1.047	1.092	1.082	1.135	1.14	1.182	0.983	1.092	1.02	NA	NA	NA	NA	NA	NA	NA
SPBPB2B2.18	1.047	1.027	1.008	0.95	1.008	0.919	1.049	1.267	1.279	NA	NA	NA	NA	NA	NA	NA
SPCC4G3.10c	1.047	1.129	1.101	1.217	1.179	1.329	1.015	1.039	1.066	NA	NA	NA	NA	NA	NA	NA
SPAC10F6.16	1.046	1.078	0.779	0.86	1.149	0.797	0.861	1.082	0.744	NA	NA	NA	NA	NA	NA	NA
SPAC14C4.10c	1.046	1.059	1.054	1.098	1.071	1.102	1.06	0.976	0.988	NA	NA	NA	NA	NA	NA	NA
SPAC15E1.02c	1.046	0.986	0.977	1.094	1.027	1.172	0.948	1.054	1.09	NA	NA	NA	NA	NA	NA	NA
SPAC8C9.10c	1.046	1.04	1.066	1.093	1.052	1.127	1.057	0.97	1.122	NA	NA	NA	NA	NA	NA	NA
SPBC713.09	1.046	1.043	1.054	1.027	1.015	0.971	1.079	0.966	0.93	NA	NA	NA	NA	NA	NA	NA
SPCC1235.09	1.046	0.97	0.843	0.622	0.873	0.815	0.955	0.769	1.351	NA	NA	NA	NA	NA	NA	NA
SPCC126.08c	1.046	1.08	1.211	0.988	1.05	1.065	1.032	0.796	1.128	NA	NA	NA	NA	NA	NA	NA
SPCC364.01	1.046	1.027	1.03	1.136	1.082	1.181	0.98	1.144	1.048	NA	NA	NA	NA	NA	NA	NA
SPBC15D4.09c	1.045	1.069	0.977	1.056	1.105	1.048	0.982	1.003	0.959	NA	NA	NA	NA	NA	NA	NA
SPBC2F12.05c	1.045	0.95	0.95	0.955	0.975	0.915	1.029	0.971	0.973	NA	NA	NA	NA	NA	NA	NA
SPBC3H7.13	1.045	1.153	0.968	1.007	1.129	1.026	1.011	0.979	1.157	NA	NA	NA	NA	NA	NA	NA
SPBC409.06	1.045	1.055	0.979	1.061	1.016	0.989	0.966	0.963	1.127	NA	NA	NA	NA	NA	NA	NA
SPCC1840.05c	1.045	1.068	0.702	0.93	1.042	0.897	0.808	1.048	1.062	NA	NA	NA	NA	NA	NA	NA
SPAC11D3.06	1.044	1.027	1.032	1.024	1.09	0.981	0.959	1.041	0.982	NA	NA	NA	NA	NA	NA	NA
SPAC13C5.04	1.044	0.996	1.014	0.964	0.929	0.984	1.115	0.99	1.237	NA	NA	NA	NA	NA	NA	NA
SPAC17H9.14c	1.044	1.042	1.026	0.963	1.032	0.995	1.038	0.986	0.998	NA	NA	NA	NA	NA	NA	NA
SPAC23H3.14	1.044	1.109	0.945	0.953	1.052	0.805	0.985	1.011	0.96	NA	NA	NA	NA	NA	NA	NA
SPAC2E1P3.05c	1.044	1.024	0.934	0.936	1.069	1.063	0.95	1.052	0.948	NA	NA	NA	NA	NA	NA	NA
SPBC115.03	1.044	0.98	1.124	1.033	0.944	1.027	1.12	1.032	0.958	NA	NA	NA	NA	NA	NA	NA
SPBC1347.02	1.044	1.085	1.101	1.063	1.047	0.915	1.035	1.003	0.859	NA	NA	NA	NA	NA	NA	NA
SPBC30B4.03c	1.044	1.014	0.953	1.026	1.078	1.179	0.938	1.121	1.254	NA	NA	NA	NA	NA	NA	NA
SPBC359.03c	1.044	0.998	1.034	0.954	0.984	0.984	0.995	0.914	0.886	NA	NA	NA	NA	NA	NA	NA
SPBC947.08c	1.044	1.043	0.975	0.925	1.02	0.934	0.956	1.023	1.264	NA	NA	NA	NA	NA	NA	NA
SPCC11E10.04	1.044	1.036	0.991	1.139	1.149	1.118	1.012	0.974	0.856	NA	NA	NA	NA	NA	NA	NA
SPAC26F1.12c	1.043	0.993	1.017	1.019	1.037	1.03	1.033	1.05	1.044	NA	NA	NA	NA	NA	NA	NA
SPAC3C7.01c	1.043	0.991	0.997	0.953	0.995	0.937	0.943	0.974	0.943	NA	NA	NA	NA	NA	NA	NA
SPBC1773.06c	1.043	0.972	0.911	0.928	0.934	0.81	0.988	0.921	0.946	NA	NA	NA	NA	NA	NA	NA
SPBC8D2.11	1.043	1	1.054	0.95	0.951	0.874	1.036	1	0.987	NA	NA	NA	NA	NA	NA	NA
SPBP4G3.03	1.043	0.786	0.923	1.09	0.894	1.045	0.956	0.997	1.034	NA	NA	NA	NA	NA	NA	NA
SPCC737.07c	1.043	1.163	1.101	1.162	1.195	1.322	0.989	1.176	1.051	NA	NA	NA	NA	NA	NA	NA
SPCC550.14	1.042	1.096	1.209	1.112	1.142	1.133	1.202	0.997	1.276	NA	NA	NA	NA	NA	NA	1
SPAC1006.01	1.042	1.006	1.036	1.053	1.014	0.957	1.013	1.007	0.955	NA	NA	NA	NA	NA	NA	NA
SPAC11D3.09	1.042	0.962	1.159	0.984	0.929	0.965	1.115	1.009	0.88	NA	NA	NA	NA	NA	NA	NA
SPAC22G7.01c	1.042	1.032	0.999	0.925	1.035	0.965	0.997	0.918	0.771	NA	NA	NA	NA	NA	NA	NA
SPAC3A12.09c	1.042	1.048	1.007	0.858	1.016	0.956	1.03	0.973	0.897	NA	NA	NA	NA	NA	NA	NA
SPAC9E9.11	1.042	0.999	1.206	1.095	1.014	1.199	1.052	1.008	1.08	NA	NA	NA	NA	NA	NA	NA
SPBC582.09	1.042	1.029	1.042	0.973	1.019	0.982	1.01	0.959	0.924	NA	NA	NA	NA	NA	NA	NA
SPBC800.05c	1.042	0.814	1.003	1.179	0.887	1.126	0.967	0.648	0.609	NA	1	NA	1	NA	NA	NA
SPCC548.07c	1.042	1	0.947	0.976	1.034	0.934	0.926	0.961	0.903	NA	NA	NA	NA	NA	NA	NA
SPCPB1C11.02	1.042	1.115	1.092	1.245	1.205	1.303	0.959	1.058	1.17	NA	NA	NA	NA	NA	NA	NA
SPCP1E11.11	1.041	1.088	0.996	0.997	1.052	1.013	1.02	1.054	0.896	NA	NA	NA	NA	NA	NA	1
SPAC13G7.02c	1.041	1.054	1.006	1.139	1.159	1.174	0.951	1.039	0.999	NA	NA	NA	NA	NA	NA	NA
SPAC22H10.13	1.041	1.059	0.945	0.971	1.11	0.986	0.962	1.011	0.935	NA	NA	NA	NA	NA	NA	NA
SPAC27D7.05c	1.041	1.073	0.951	1.186	1.087	1.088	1.009	1.002	1.046	NA	NA	NA	NA	NA	NA	NA
SPAC513.07	1.041	1.048	1.018	0.985	1.008	0.872	1.01	0.856	0.771	NA	NA	NA	NA	NA	NA	NA
SPBC1773.09c	1.041	0.905	0.835	0.937	0.925	0.897	0.963	0.846	0.998	NA	NA	NA	NA	NA	NA	NA
SPCC1183.11	1.041	1.049	1.013	1.058	1.043	1.005	0.994	0.814	1.006	NA	NA	NA	NA	NA	NA	NA
SPBC16C6.05	1.04	0.976	1.07	1.009	0.951	1.034	1.064	1.104	1.144	NA	NA	NA	NA	NA	NA	1
SPCC737.05	1.04	1.015	1.007	1.057	1.039	1.056	0.975	1.248	0.996	NA	NA	NA	NA	NA	NA	NA
SPCPB16A4.05c	1.04	1.053	1.037	1.046	1.099	1.082	1.027	0.975	0.991	NA	NA	NA	NA	NA	NA	NA
SPAC10F6.05c	1.039	1.135	0.886	1.016	1.168	1.089	0.853	1.192	0.971	NA	NA	NA	NA	NA	NA	NA
SPAC11G7.04	1.039	0.903	0.822	0.956	0.91	0.959	0.99	1.683	2.043	NA	NA	NA	NA	NA	NA	NA
SPAC17G8.05	1.039	1.005	0.842	0.99	0.979	0.904	0.933	0.936	1.364	NA	NA	NA	NA	NA	NA	NA
SPAC17G8.08c	1.039	1.028	0.907	1.027	0.988	1.019	0.92	0.831	0.848	NA	NA	NA	NA	NA	NA	NA
SPAC18B11.08c	1.039	1.03	1.089	1.116	1.063	1.019	1.026	1.031	0.97	NA	NA	NA	NA	NA	NA	NA
SPAC26A3.16	1.039	1.136	0.879	0.962	1.171	0.953	0.925	1.114	1.462	NA	NA	NA	NA	NA	NA	NA
SPBC12D12.06	1.039	1.009	0.932	0.646	0.946	0.824	1.04	1.25	0.692	NA	NA	NA	NA	NA	NA	NA
SPBC1773.08c	1.039	0.959	1.04	0.969	0.945	0.93	1.043	0.966	0.914	NA	NA	NA	NA	NA	NA	NA
SPBC21C3.19	1.039	0.977	1.032	1.156	0.989	1.233	0.929	0.985	1.018	NA	NA	NA	NA	NA	NA	NA
SPBC25H2.03	1.039	1	0.917	0.928	1.027	0.859	0.983	1.033	0.898	NA	NA	NA	NA	NA	NA	NA
SPCC1442.11c	1.039	1.016	0.971	1.006	0.987	1.07	0.99	0.974	0.922	NA	NA	NA	NA	NA	NA	NA
SPCC23B6.04c	1.039	0.951	1.054	0.982	0.949	0.979	1.025	1.021	0.967	NA	NA	NA	NA	NA	NA	NA
SPCC663.15c	1.039	0.909	1.082	1.18	0.921	0.81	1.043	0.752	0.999	NA	NA	NA	NA	NA	NA	NA
SPAC1952.10c	1.038	1.124	1.249	0.969	0.962	0.861	1.043	1.003	1.01	NA	NA	NA	NA	NA	NA	NA
SPAC22H10.07	1.038	1.009	1.002	1.078	1.044	1.091	0.994	1.061	1.366	NA	NA	NA	NA	NA	NA	NA
SPAC630.07c	1.038	1.042	0.986	0.882	1.027	0.85	1.001	1.066	0.877	NA	NA	NA	NA	NA	NA	NA
SPAP27G11.10c	1.038	0.993	1.14	0.966	0.97	0.933	0.972	0.968	1.004	NA	NA	NA	NA	NA	NA	NA
SPBC17A3.03c	1.038	1.086	1.054	1.068	1.072	0.931	1.06	1.013	0.895	NA	NA	NA	NA	NA	NA	NA
SPBC4F6.10	1.038	0.901	0.911	0.767	0.872	0.663	0.945	1.025	1.344	NA	NA	NA	NA	NA	NA	NA
SPCC663.08c	1.038	1.079	1.05	1.15	1.139	1.189	1.042	1.09	0.965	NA	NA	NA	NA	NA	NA	NA
SPCC830.08c	1.038	0.992	1.026	0.975	1	1.001	0.998	1.015	0.906	NA	NA	NA	NA	NA	NA	NA
SPAC1687.10	1.037	1.132	1.066	0.942	1.039	0.899	1.084	1.088	1.271	NA	NA	NA	NA	NA	NA	NA
SPAC16C9.02c	1.037	1.026	0.97	0.961	1.045	0.949	1.054	1.05	0.958	NA	NA	NA	NA	NA	NA	NA
SPAC20H4.10	1.037	1.052	1.032	0.977	1.122	1.081	1.019	1.179	0.888	NA	NA	NA	NA	NA	NA	NA
SPAC227.05	1.037	0.977	0.916	1.027	0.963	1.032	1.049	0.899	0.996	NA	NA	NA	NA	NA	NA	NA
SPAC24C9.12c	1.037	0.981	0.982	0.939	0.969	0.937	0.982	1.023	0.868	NA	NA	NA	NA	NA	NA	NA
SPAC3G6.06c	1.037	0.93	0.829	0.705	0.9	0.757	0.898	1.187	0.94	NA	NA	NA	NA	NA	NA	NA
SPAC3H1.08c	1.037	1.056	1.137	1.004	0.985	0.965	1.081	1.046	0.966	NA	NA	NA	NA	NA	NA	NA
SPAC4D7.07c	1.037	1.039	0.975	0.957	0.98	0.967	1.007	1.103	1.055	NA	NA	NA	NA	NA	NA	NA
SPAC4F8.15	1.037	0.993	1	1.004	0.945	0.984	1.015	0.98	0.964	NA	NA	NA	NA	NA	NA	NA
SPAC869.02c	1.037	1.032	0.894	0.968	0.992	0.966	0.933	0.987	0.901	NA	NA	NA	NA	NA	NA	NA
SPBC19C7.10	1.037	0.988	1.152	0.941	1.012	1.05	1.109	1.046	0.954	NA	NA	NA	NA	NA	NA	NA
SPCC569.04	1.037	1.052	0.999	1.186	1.097	1.143	1.108	1.083	1.047	NA	NA	NA	NA	NA	NA	NA
SPAC23D3.01	1.036	0.939	1.232	1.317	1	1.119	1.07	1.062	1.073	NA	NA	NA	NA	NA	NA	NA
SPAC9G1.11c	1.036	1.006	0.997	0.966	1.046	0.814	1.078	0.893	0.682	NA	NA	NA	NA	NA	NA	NA
SPBC15D4.01c	1.036	0.998	1.008	1.1	1.092	1.077	0.992	0.987	0.871	NA	NA	NA	NA	NA	NA	NA
SPBC15D4.05	1.036	1.039	1.081	1.004	0.994	0.889	1.139	0.974	0.995	NA	NA	NA	NA	NA	NA	NA
SPBC24C6.09c	1.036	0.974	1.065	0.955	0.963	1.058	1.106	0.989	0.854	NA	NA	NA	NA	NA	NA	NA
SPBC3D6.13c	1.036	1.045	1.048	0.982	1.088	0.988	1.068	0.96	0.878	NA	NA	NA	NA	NA	NA	NA
SPBPB10D8.07c	1.036	0.936	0.994	0.984	0.902	0.966	1.107	0.497	0.675	NA	1	NA	1	NA	NA	NA
SPCC1442.05c	1.036	0.967	0.881	0.756	0.896	0.766	0.878	0.849	0.654	NA	1	NA	1	NA	NA	NA
SPCC1442.17c	1.036	0.989	0.961	0.965	1.025	0.952	0.94	1.015	0.956	NA	NA	NA	NA	NA	NA	NA
SPAC19D5.03	1.035	1.05	0.969	0.935	1.05	0.923	0.994	0.97	0.868	NA	NA	NA	NA	NA	NA	1
SPAC1002.01	1.035	0.951	1.023	0.981	0.991	0.957	1.061	1.026	0.967	NA	NA	NA	NA	NA	NA	NA
SPAC1250.04c	1.035	0.984	0.989	0.927	1.007	0.943	1.029	0.673	0.6	NA	1	NA	1	NA	NA	NA
SPAC1527.01	1.035	0.959	1.051	1.059	1.048	0.948	1.018	0.957	1.003	NA	NA	NA	NA	NA	NA	NA
SPAC18B11.09c	1.035	1.062	1.099	1.135	1.068	1.012	1.012	1.015	0.996	NA	NA	NA	NA	NA	NA	NA
SPAC27D7.02c	1.035	1.004	1.021	0.997	1.054	1.284	1.019	1.066	1.182	NA	NA	NA	NA	NA	NA	NA
SPAC637.13c	1.035	1.047	0.927	1.078	1.061	0.977	1.01	1.057	0.969	NA	NA	NA	NA	NA	NA	NA
SPBC26H8.03	1.035	1.341	1.057	0.995	1.147	0.816	0.991	1.171	1.243	NA	NA	NA	NA	NA	NA	NA
SPBC28F2.02	1.035	0.99	0.762	0.886	0.938	0.791	0.837	0.797	0.98	NA	NA	NA	NA	NA	NA	NA
SPBC30D10.16	1.035	1.145	0.877	1.062	1.072	0.972	0.965	0.92	0.932	NA	NA	NA	NA	NA	NA	NA
SPCC70.02c	1.035	0.981	1.076	0.993	0.998	1.068	0.925	1.031	1.035	NA	NA	NA	NA	NA	NA	NA
SPBP8B7.10c	1.034	1.157	0.907	1.021	1.173	1.13	1.036	1.055	0.986	NA	NA	NA	NA	NA	NA	1
SPAC12G12.12	1.034	0.995	1.234	1.119	1.005	1.168	1.015	0.97	1.326	NA	NA	NA	NA	NA	NA	NA
SPBC16C6.01c	1.034	1.003	1.072	0.987	0.931	0.888	1.026	0.936	0.968	NA	NA	NA	NA	NA	NA	NA
SPBC1711.13	1.034	1.043	0.914	1.034	0.989	1.142	0.904	0.805	0.859	NA	NA	NA	NA	NA	NA	NA
SPBC30D10.04	1.034	1.037	1.369	0.923	1.033	0.983	1.406	1.062	1.118	NA	NA	NA	NA	NA	NA	NA
SPCC663.13c	1.034	0.993	1.046	0.965	0.955	1.012	1.088	0.989	0.91	NA	NA	NA	NA	NA	NA	NA
SPAC12G12.01c	1.033	0.98	0.826	0.927	1.048	0.938	0.882	1.004	0.887	NA	NA	NA	NA	NA	NA	NA
SPAC607.06c	1.033	1.036	0.988	1.081	1.079	1.033	0.992	0.989	1.013	NA	NA	NA	NA	NA	NA	NA
SPAPB1A11.02	1.033	1.006	1	0.967	1.023	0.999	0.97	1.047	0.901	NA	NA	NA	NA	NA	NA	NA
SPBC23G7.07c	1.033	1.075	0.939	1.025	1.092	1.04	0.961	1.009	0.94	NA	NA	NA	NA	NA	NA	NA
SPBC409.11	1.033	1.086	1.046	1.016	1.084	1.006	1.05	0.979	0.882	NA	NA	NA	NA	NA	NA	NA
SPCC5E4.10c	1.033	1.065	0.841	0.826	0.984	0.751	0.877	0.949	0.925	NA	NA	NA	NA	NA	NA	NA
SPCC965.09	1.033	1.095	1.011	1.124	1.162	1.166	0.971	1.11	1.071	NA	NA	NA	NA	NA	NA	NA
SPAC4F10.11	1.032	0.972	1.097	1.026	0.984	0.676	1.072	1.161	0.925	NA	NA	NA	NA	NA	NA	NA
SPAC4G8.07c	1.032	0.986	1.034	0.896	1.035	0.942	1.041	0.971	0.835	NA	NA	NA	NA	NA	NA	NA
SPAC806.07	1.032	1.044	1.236	1.44	1.107	1.401	1.172	1.139	0.946	NA	NA	NA	NA	NA	NA	NA
SPBC839.07	1.032	0.942	1.02	0.989	0.984	0.944	1.006	0.927	0.88	NA	NA	NA	NA	NA	NA	NA
SPBC29A3.14c	1.031	0.98	1.084	0.95	0.911	0.818	0.973	1.062	1.222	NA	NA	NA	NA	NA	NA	1
SPAC17A2.11	1.031	0.99	1.133	1.154	0.98	1.214	1.113	0.956	1.122	NA	NA	NA	NA	NA	NA	NA
SPAC27E2.02	1.031	1.043	1.055	1.076	1.076	1.089	1.056	1.031	1.134	NA	NA	NA	NA	NA	NA	NA
SPBC21C3.11	1.031	0.912	0.775	0.774	0.725	0.601	0.788	0.918	0.564	NA	1	NA	NA	1	NA	NA
SPBC31F10.13c	1.031	1.005	1.077	0.983	1.042	1.016	1.06	1.3	1.312	NA	NA	NA	NA	NA	NA	NA
SPBC36.06c	1.031	1.023	0.95	0.961	1.019	0.923	0.969	1.121	1.264	NA	NA	NA	NA	NA	NA	NA
SPBC4F6.12	1.031	0.934	1.17	1.065	0.868	1.034	1.238	1.018	1.326	NA	NA	NA	NA	NA	NA	NA
SPCC965.06	1.031	0.956	1.014	0.956	0.892	0.957	1.008	0.938	0.953	NA	NA	NA	NA	NA	NA	NA
SPCC965.08c	1.031	0.99	1.086	1.308	1.128	1.293	1.051	1.107	0.976	NA	NA	NA	NA	NA	NA	NA
SPAC26A3.07c	1.03	1.047	0.981	1.026	1.119	1.067	1.043	3.467	3.464	NA	NA	NA	NA	NA	NA	1
SPAC1250.03	1.03	1.03	1.03	0.983	1.039	0.981	1.013	0.944	0.796	NA	NA	NA	NA	NA	NA	NA
SPAC13G6.09	1.03	0.935	0.959	1.021	1.029	1.067	0.946	0.936	1.056	NA	NA	NA	NA	NA	NA	NA
SPAC20H4.05c	1.03	0.989	1.013	1.004	1.025	1.016	1.022	0.968	0.966	NA	NA	NA	NA	NA	NA	NA
SPAC2C4.14c	1.03	0.928	1.152	0.976	0.807	0.883	0.988	1.01	0.915	NA	NA	NA	NA	NA	NA	NA
SPBC13E7.04	1.03	1.071	0.987	1.107	1.102	1.048	0.962	1.007	1.114	NA	NA	NA	NA	NA	NA	NA
SPBC1604.03c	1.03	1.068	0.922	1.059	1.159	1.094	0.99	0.92	0.834	NA	NA	NA	NA	NA	NA	NA
SPCC970.10c	1.03	1.033	1.085	0.974	0.987	1.012	1.063	1.652	1.587	NA	NA	NA	NA	NA	NA	NA
SPAC18B11.04	1.029	1.052	1.057	0.96	1.04	0.992	1.046	0.932	1.509	NA	NA	NA	NA	NA	NA	NA
SPAC56E4.07	1.029	1.026	1.048	1.057	0.995	1.094	1.004	0.963	1.464	NA	NA	NA	NA	NA	NA	NA
SPAC869.06c	1.029	1.03	1.008	0.955	0.955	0.989	0.942	1.034	0.906	NA	NA	NA	NA	NA	NA	NA
SPAC8E11.10	1.029	1.002	1.065	0.956	0.965	0.948	1.077	0.949	0.836	NA	NA	NA	NA	NA	NA	NA
SPBC800.12c	1.029	1.062	0.896	1.089	1.126	1.085	0.915	1.062	0.957	NA	NA	NA	NA	NA	NA	NA
SPCC13B11.04c	1.029	1.016	1.012	1.022	1.028	1.024	0.987	1.022	1.072	NA	NA	NA	NA	NA	NA	NA
SPAC2E1P3.04	1.028	1.086	0.945	1.004	1.065	1.002	1.006	0.92	1.074	NA	NA	NA	NA	NA	NA	NA
SPBC23G7.08c	1.028	1.023	0.76	0.763	1.091	0.854	0.968	1.056	0.684	NA	NA	NA	NA	NA	NA	NA
SPBC887.10	1.028	1	1.062	0.957	1	0.993	1.036	0.925	0.892	NA	NA	NA	NA	NA	NA	NA
SPAC10F6.12c	1.027	0.969	0.96	0.988	0.989	1.008	0.96	0.906	1.142	NA	NA	NA	NA	NA	NA	NA
SPAC17A5.09c	1.027	0.961	1.008	0.948	1.031	0.942	0.972	1.098	1.114	NA	NA	NA	NA	NA	NA	NA
SPAC26H5.09c	1.027	1.101	1.084	1.136	1.153	1.147	0.982	0.966	0.93	NA	NA	NA	NA	NA	NA	NA
SPAC3C7.06c	1.027	1.061	1.047	0.987	1.035	0.94	1.059	1.114	1.023	NA	NA	NA	NA	NA	NA	NA
SPAC3F10.18c	1.027	1.016	0.994	1.126	1.005	1.039	1.061	0.995	1.064	NA	NA	NA	NA	NA	NA	NA
SPAC6G10.11c	1.027	0.963	1.014	0.937	0.901	0.926	1.043	1.205	0.714	NA	NA	NA	NA	NA	NA	NA
SPAC823.10c	1.027	0.957	1.284	0.965	0.904	1.036	1.287	0.172	0.136	NA	1	NA	NA	1	NA	NA
SPBC2G2.14	1.027	1.12	1.027	1.139	1.21	1.061	1.079	1.086	0.891	NA	NA	NA	NA	NA	NA	NA
SPBPB10D8.01	1.027	1.051	1.01	1.016	1.072	0.975	0.979	1.047	0.963	NA	NA	NA	NA	NA	NA	NA
SPCC126.10	1.027	1.024	0.975	0.956	0.998	0.83	1.031	0.999	0.966	NA	NA	NA	NA	NA	NA	NA
SPCC1884.02	1.027	0.95	1.266	0.984	0.955	1.164	1.029	1.111	1.528	NA	NA	NA	NA	NA	NA	NA
SPCC320.04c	1.027	0.997	1.013	0.918	0.976	0.825	0.961	0.943	0.834	NA	NA	NA	NA	NA	NA	NA
SPCC364.02c	1.027	0.972	1.169	0.999	0.931	0.977	1.194	1.007	0.911	NA	NA	NA	NA	NA	NA	NA
SPCC4G3.17	1.027	1.017	0.961	0.948	0.967	0.827	1.003	0.964	0.869	NA	NA	NA	NA	NA	NA	NA
SPCC970.05	1.027	0.96	1.054	1.307	1.034	1.374	1.009	1.67	1.733	NA	NA	NA	NA	NA	NA	NA
SPAC16E8.17c	1.026	0.995	1.055	1.033	0.998	1.065	1.023	0.866	0.991	NA	NA	NA	NA	NA	NA	NA
SPAC26H5.03	1.026	1.009	1.038	1.074	1.117	1.097	0.993	1.046	1.008	NA	NA	NA	NA	NA	NA	NA
SPCC1494.08c	1.026	0.988	0.978	1.016	1.004	0.995	0.942	1.14	1.055	NA	NA	NA	NA	NA	NA	NA
SPCC663.10	1.026	0.993	1.067	0.993	0.992	0.998	1.046	0.917	0.868	NA	NA	NA	NA	NA	NA	NA
SPCC794.15	1.026	1.03	1.129	1.058	1.036	1.067	1.163	1.038	1.136	NA	NA	NA	NA	NA	NA	NA
SPAC12G12.15	1.025	0.981	0.953	0.855	0.997	0.928	0.804	1.067	1.218	NA	NA	NA	NA	NA	NA	NA
SPAC1D4.13	1.025	1.035	1.117	0.949	1.04	1.067	1.149	0.975	1.011	NA	NA	NA	NA	NA	NA	NA
SPAC22A12.02c	1.025	0.953	0.978	0.928	0.962	0.935	0.928	1.035	0.871	NA	NA	NA	NA	NA	NA	NA
SPBC543.03c	1.025	1.054	1.077	1.021	1.089	0.975	0.961	0.878	0.874	NA	NA	NA	NA	NA	NA	NA
SPBC800.02	1.025	1.029	0.807	0.879	0.989	0.845	0.916	1.035	0.862	NA	NA	NA	NA	NA	NA	NA
SPBP26C9.02c	1.025	1.044	0.887	1.039	1.044	0.993	0.964	0.985	0.835	NA	NA	NA	NA	NA	NA	NA
SPCC1235.08c	1.025	1.048	1.08	0.988	1.015	0.943	1.087	0.699	0.623	NA	1	NA	1	NA	NA	NA
SPAC20G4.02c	1.024	1.011	1.159	0.967	0.941	1.012	1.14	1.292	1.166	NA	NA	NA	NA	NA	NA	NA
SPAC57A10.07	1.024	1.114	1.078	1.139	1.225	1.125	0.951	1.069	1.12	NA	NA	NA	NA	NA	NA	NA
SPAC869.11	1.024	0.99	1.211	1.035	0.963	0.982	1.147	0.972	1.607	NA	NA	NA	NA	NA	NA	NA
SPBC1685.15c	1.024	1.06	1.021	1.131	1.076	0.977	1.013	0.886	1.035	NA	NA	NA	NA	NA	NA	NA
SPBC2D10.07c	1.024	1.014	1.07	0.963	1.021	0.923	1.029	1.088	0.934	NA	NA	NA	NA	NA	NA	NA
SPCC1840.04	1.024	0.974	0.991	0.97	0.981	0.98	0.999	1.02	0.99	NA	NA	NA	NA	NA	NA	NA
SPAPB24D3.02c	1.023	1.01	1.043	1.001	1.036	0.968	1.035	1.03	0.945	NA	NA	NA	NA	NA	NA	NA
SPBC3H7.05c	1.023	0.978	1.024	1.026	0.954	1.005	1.022	0.987	0.933	NA	NA	NA	NA	NA	NA	NA
SPBP35G2.06c	1.023	0.998	1.064	1.027	1.019	1.074	1.108	1.006	1.065	NA	NA	NA	NA	NA	NA	NA
SPBPB2B2.07c	1.023	1.074	0.834	0.871	0.999	0.887	0.897	0.945	0.91	NA	NA	NA	NA	NA	NA	NA
SPBC25D12.05	1.022	1.065	0.953	1.23	1.166	1.217	1.033	0.943	1.061	NA	NA	NA	NA	NA	NA	1
SPAC11D3.15	1.022	0.973	1.091	0.967	0.942	0.952	1.071	0.958	1.017	NA	NA	NA	NA	NA	NA	NA
SPAC2F3.05c	1.022	0.984	1.025	0.896	0.959	0.896	1.085	0.953	0.842	NA	NA	NA	NA	NA	NA	NA
SPAC3C7.05c	1.022	0.969	1.026	1.022	0.97	0.905	1.025	0.964	0.888	NA	NA	NA	NA	NA	NA	NA
SPBC1348.01	1.022	1.035	0.953	1.015	1.038	0.983	0.96	0.987	0.934	NA	NA	NA	NA	NA	NA	NA
SPBC3E7.16c	1.022	1.017	1.109	1.002	1.044	1.098	1.077	0.816	0.828	NA	NA	NA	NA	NA	NA	NA
SPBP4H10.05c	1.022	1.152	0.807	0.89	1.065	0.882	0.857	1.039	0.893	NA	NA	NA	NA	NA	NA	NA
SPCC4B3.11c	1.022	0.967	1.019	1.131	0.958	1.202	1.014	0.946	1.113	NA	NA	NA	NA	NA	NA	NA
SPAC10F6.13c	1.021	0.965	0.97	0.906	0.928	0.912	1.013	1.418	1.379	NA	NA	NA	NA	NA	NA	NA
SPAC227.04	1.021	1.035	0.973	1.024	1.04	1.034	0.95	0.949	0.945	NA	NA	NA	NA	NA	NA	NA
SPAC22F8.09	1.021	0.969	1.086	1.037	0.956	1.113	1.071	1.035	0.971	NA	NA	NA	NA	NA	NA	NA
SPBC1861.03	1.021	0.988	1.27	1.387	1.022	1.045	1.12	1.208	1.287	NA	NA	NA	NA	NA	NA	NA
SPBC19C7.08c	1.021	1.104	1.173	1.123	1.134	1.161	0.976	1.071	0.963	NA	NA	NA	NA	NA	NA	NA
SPCC1442.04c	1.021	1.065	1.142	1.09	1.072	0.992	1.044	1.151	1.333	NA	NA	NA	NA	NA	NA	NA
SPCC4G3.08	1.021	1.1	0.789	1	1.146	1.049	0.857	1.034	0.915	NA	NA	NA	NA	NA	NA	NA
SPBC1271.15c	1.02	0.994	1.045	1.017	1.002	0.961	1.041	0.934	0.856	NA	NA	NA	NA	NA	NA	1
SPBC902.04	1.02	0.947	0.998	0.924	0.928	0.96	0.933	0.939	0.914	NA	NA	NA	NA	NA	NA	1
SPAC14C4.16	1.02	1	1.239	1.057	0.966	1.11	1.041	0.555	1.342	NA	NA	NA	NA	NA	NA	NA
SPAC1556.05c	1.02	0.9	0.798	0.703	0.905	0.535	0.947	1.656	1.764	NA	NA	NA	NA	NA	NA	NA
SPAC17A5.08	1.02	1.137	0.97	1.55	1.203	1.344	1.136	0.991	1.234	NA	NA	NA	NA	NA	NA	NA
SPAC823.16c	1.02	0.943	1.067	1.101	0.991	1.063	0.985	0.653	0.651	NA	1	NA	NA	1	NA	NA
SPBC83.17	1.02	0.998	1.099	1.014	0.966	0.934	1.052	0.926	0.959	NA	NA	NA	NA	NA	NA	NA
SPBC9B6.09c	1.02	0.963	1.029	1.067	0.968	1.064	0.974	0.938	0.939	NA	NA	NA	NA	NA	NA	NA
SPCC1183.06	1.02	0.986	1.016	1.001	0.975	0.894	1.048	1.001	0.894	NA	NA	NA	NA	NA	NA	NA
SPBC839.15c	1.019	0.944	1.068	1.025	0.887	0.899	0.953	1.248	1.295	NA	NA	NA	NA	NA	NA	1
SPAC17G8.07	1.019	1.065	0.897	0.953	1.019	0.943	0.954	1.05	0.902	NA	NA	NA	NA	NA	NA	NA
SPAC19D5.11c	1.019	1.007	1.176	1.211	1.067	1.142	1.19	1.112	1.36	NA	NA	NA	NA	NA	NA	NA
SPAC19G12.09	1.019	1.002	0.959	0.908	1.026	0.948	0.977	1.012	0.962	NA	NA	NA	NA	NA	NA	NA
SPAP27G11.16	1.019	1.042	1.03	0.94	0.953	0.845	1.057	1.012	0.871	NA	NA	NA	NA	NA	NA	NA
SPBC215.02	1.019	0.875	1.142	0.959	0.853	0.999	1.239	0.984	1.012	NA	NA	NA	NA	NA	NA	NA
SPBC887.08	1.019	1.008	0.775	0.952	1.002	0.961	0.721	0.819	0.914	NA	NA	NA	NA	NA	NA	NA
SPCC613.02	1.019	1.005	1.025	0.998	1.006	1.027	1.063	1.049	0.916	NA	NA	NA	NA	NA	NA	NA
SPAC15E1.10	1.018	0.98	1.134	0.977	0.901	1.002	1.165	0.892	0.922	NA	NA	NA	NA	NA	NA	NA
SPAC22F3.11c	1.018	0.98	1.028	0.996	0.987	0.96	0.982	0.927	1.238	NA	NA	NA	NA	NA	NA	NA
SPBC1271.10c	1.018	0.977	0.963	1.029	1.044	1.045	0.906	0.776	0.812	NA	NA	NA	NA	NA	NA	NA
SPBC16C6.03c	1.018	0.964	0.965	0.915	0.916	0.909	0.987	1.277	1.291	NA	NA	NA	NA	NA	NA	NA
SPBC19G7.18c	1.018	0.984	1.023	0.983	0.987	1.061	1.058	0.989	0.917	NA	NA	NA	NA	NA	NA	NA
SPBC21C3.06	1.018	1.001	1.005	0.966	0.965	0.978	0.967	0.95	0.801	NA	NA	NA	NA	NA	NA	NA
SPAC1006.06	1.017	1.048	0.88	0.914	1.048	0.883	0.914	1	0.813	NA	NA	NA	NA	NA	NA	NA
SPAC664.13	1.017	1	1.052	1.009	1.013	1.046	1.036	1.037	0.992	NA	NA	NA	NA	NA	NA	NA
SPAC6G9.01c	1.017	1.024	1.102	1.005	0.945	0.908	1.098	1.013	0.914	NA	NA	NA	NA	NA	NA	NA
SPBC106.03	1.017	1.018	1.084	1.113	1.006	1.076	1.014	1.043	0.972	NA	NA	NA	NA	NA	NA	NA
SPBC651.12c	1.017	1.013	1.03	0.969	0.982	0.882	1.017	0.923	0.883	NA	NA	NA	NA	NA	NA	NA
SPBP35G2.12	1.017	1.042	1.095	1.069	0.967	1.029	1.054	0.978	0.937	NA	NA	NA	NA	NA	NA	NA
SPCC965.05c	1.017	0.827	0.994	1.124	0.918	1.028	0.962	0.989	0.939	NA	NA	NA	NA	NA	NA	NA
SPAC20G8.09c	1.016	1.016	1.112	0.971	1.006	1.012	0.988	1.016	0.91	NA	NA	NA	NA	NA	NA	NA
SPAC22F3.03c	1.016	1.001	0.948	0.922	1.076	0.96	0.89	1.01	0.795	NA	NA	NA	NA	NA	NA	NA
SPAC31G5.15	1.016	1.064	0.945	1.068	1.147	1.08	0.931	1.02	0.998	NA	NA	NA	NA	NA	NA	NA
SPBC14C8.05c	1.016	0.983	1.011	0.983	0.98	0.931	0.995	0.934	0.816	NA	NA	NA	NA	NA	NA	NA
SPBC25H2.05	1.016	0.952	0.997	1.124	1.046	0.995	0.946	1.033	1.022	NA	NA	NA	NA	NA	NA	NA
SPBC947.06c	1.016	0.975	0.947	1.004	0.977	1.05	0.973	0.945	0.872	NA	NA	NA	NA	NA	NA	NA
SPCC1494.09c	1.016	0.967	0.92	1.044	0.981	1.009	0.976	0.93	0.885	NA	NA	NA	NA	NA	NA	NA
SPCC330.14c	1.016	1.038	1.299	1.255	1.082	1.483	1.14	1.061	1.224	NA	NA	NA	NA	NA	NA	NA
SPCC663.09c	1.016	0.987	0.883	0.911	1.037	0.886	0.949	0.966	0.917	NA	NA	NA	NA	NA	NA	NA
SPAC25G10.06	1.015	0.955	0.882	0.957	1.018	0.995	0.887	1.588	1.377	NA	NA	NA	NA	NA	NA	NA
SPAC6G9.13c	1.015	0.98	1.088	1.001	0.98	1.047	1.109	0.987	0.953	NA	NA	NA	NA	NA	NA	NA
SPCC24B10.16c	1.015	0.943	0.981	1.05	1.127	1.03	0.912	0.851	1.339	NA	NA	NA	NA	NA	NA	NA
SPCC794.10	1.015	0.836	0.959	0.929	0.813	0.908	1.022	0.944	0.925	NA	NA	NA	NA	NA	NA	NA
SPAC12B10.10	1.014	1.046	1.025	1.067	1.039	0.936	1.024	1.019	0.974	NA	NA	NA	NA	NA	NA	NA
SPAC1399.04c	1.014	1.016	1.083	0.963	0.984	0.947	1.065	1.015	0.799	NA	NA	NA	NA	NA	NA	NA
SPAC1782.02c	1.014	0.964	0.794	1.045	0.969	1.064	0.882	0.78	0.947	NA	NA	NA	NA	NA	NA	NA
SPAC1F3.05	1.014	0.998	0.996	1.101	1.054	1.089	0.954	1.091	1.086	NA	NA	NA	NA	NA	NA	NA
SPAC22A12.17c	1.014	1.035	1.044	1.113	1.074	1.129	1.006	0.979	0.998	NA	NA	NA	NA	NA	NA	NA
SPAC23D3.03c	1.014	0.951	0.987	0.864	0.988	0.917	1.02	1.001	0.943	NA	NA	NA	NA	NA	NA	NA
SPAC3F10.15c	1.014	0.947	1.011	1.045	0.984	1.041	0.975	1.069	1.002	NA	NA	NA	NA	NA	NA	NA
SPBC215.01	1.014	0.954	0.995	1.009	0.972	0.924	0.934	0.945	0.848	NA	NA	NA	NA	NA	NA	NA
SPBC17G9.09	1.013	0.993	0.911	1.111	1.139	1.182	0.882	1.004	1.083	NA	NA	NA	NA	NA	NA	1
SPAC22A12.03c	1.013	0.97	0.919	1.026	1.031	1.025	0.888	1.022	0.982	NA	NA	NA	NA	NA	NA	NA
SPAC8C9.05	1.013	1.005	1.003	0.946	0.956	0.912	0.995	0.944	1.133	NA	NA	NA	NA	NA	NA	NA
SPBC21H7.07c	1.013	1.014	1.062	1.028	0.937	0.866	1.094	1.019	0.93	NA	NA	NA	NA	NA	NA	NA
SPBC11C11.10	1.012	0.887	0.889	1.005	0.971	0.96	0.907	0.987	1.108	NA	NA	NA	NA	NA	NA	1
SPAC1834.03c	1.012	1.004	1.14	1.031	1.02	1.087	1.098	1.043	1.068	NA	NA	NA	NA	NA	NA	NA
SPAC20H4.02	1.012	0.966	1.014	0.787	0.981	0.906	0.92	1.665	1.181	NA	NA	NA	NA	NA	NA	NA
SPAC31G5.12c	1.012	0.838	0.893	0.866	0.8	0.815	1.053	1.03	1.112	NA	NA	NA	NA	NA	NA	NA
SPAC823.13c	1.012	0.938	1.055	0.951	0.968	0.979	0.989	1.021	0.943	NA	NA	NA	NA	NA	NA	NA
SPAC8C9.17c	1.012	1.01	1.049	0.965	0.929	1.113	1.065	0.917	0.951	NA	NA	NA	NA	NA	NA	NA
SPBC428.10	1.012	0.987	1.027	1.03	1.01	0.972	1.101	0.997	0.916	NA	NA	NA	NA	NA	NA	NA
SPBC543.02c	1.012	1.029	1.061	0.965	1.017	0.971	1.073	0.899	0.96	NA	NA	NA	NA	NA	NA	NA
SPBC8D2.12c	1.012	1.022	0.916	1.013	1.003	1.071	0.897	0.955	0.827	NA	NA	NA	NA	NA	NA	NA
SPBP4G3.02	1.012	1.028	1.207	1.077	1.04	1.075	1.169	1.039	0.966	NA	NA	NA	NA	NA	NA	NA
SPCC1223.04c	1.012	1.064	1.02	1.099	1.083	1.105	1.036	1.086	0.95	NA	NA	NA	NA	NA	NA	NA
SPCC63.13	1.012	0.948	1.12	0.945	0.896	0.949	1.095	1.001	0.894	NA	NA	NA	NA	NA	NA	NA
SPBC1604.16c	1.011	1.01	0.945	0.943	0.964	0.905	1.013	0.92	0.913	NA	NA	NA	NA	NA	NA	1
SPAC13A11.05	1.011	1.009	0.914	1.123	1.077	1.057	0.894	1.004	1.07	NA	NA	NA	NA	NA	NA	NA
SPAC186.09	1.011	0.994	0.894	0.893	0.987	0.957	0.978	0.865	0.747	NA	NA	NA	NA	NA	NA	NA
SPAC25B8.10	1.011	0.883	0.855	0.975	0.957	0.954	0.954	0.833	0.951	NA	NA	NA	NA	NA	NA	NA
SPAC9G1.12	1.011	1.086	1.195	1.129	1.093	1.393	1.041	0.999	1.02	NA	NA	NA	NA	NA	NA	NA
SPCC576.02	1.011	1.095	1	1.104	1.174	1.192	0.946	0.978	1.01	NA	NA	NA	NA	NA	NA	NA
SPAC11D3.04c	1.01	1.074	1.073	0.965	0.981	0.981	1.064	0.965	1.017	NA	NA	NA	NA	NA	NA	NA
SPAC26H5.04	1.01	1.013	1.119	1.279	1.013	1.344	1.111	1.006	1.2	NA	NA	NA	NA	NA	NA	NA
SPAC2F7.03c	1.01	0.959	1.065	0.947	0.925	0.924	0.992	1.138	1.264	NA	NA	NA	NA	NA	NA	NA
SPAC5H10.09c	1.01	0.979	1.026	0.957	0.988	1.005	1.051	0.971	0.822	NA	NA	NA	NA	NA	NA	NA
SPAC5H10.12c	1.01	0.887	0.921	1.086	0.941	0.938	1.098	0.936	1.235	NA	NA	NA	NA	NA	NA	NA
SPBC13E7.07	1.01	1.147	1.1	1.359	1.246	1.254	0.999	1.023	1.064	NA	NA	NA	NA	NA	NA	NA
SPBC29A10.16c	1.01	0.954	1.311	1.126	1.083	1.278	1.021	0.982	1.432	NA	NA	NA	NA	NA	NA	NA
SPBC365.01	1.01	0.954	0.97	0.919	0.89	0.782	1.01	1.105	0.983	NA	NA	NA	NA	NA	NA	NA
SPBC409.19c	1.01	0.993	1.017	0.943	0.948	1.002	1.085	1.163	1.07	NA	NA	NA	NA	NA	NA	NA
SPBC8D2.04	1.01	1.012	1.034	1.024	1.012	1.068	0.995	1.046	1.063	NA	NA	NA	NA	NA	NA	NA
SPCC1281.07c	1.01	0.961	0.948	1.201	0.93	1.177	0.905	0.838	1.029	NA	NA	NA	NA	NA	NA	NA
SPCC1620.04c	1.01	1.041	0.928	1.002	0.891	0.781	1.012	0.971	0.99	NA	NA	NA	NA	NA	NA	NA
SPCC622.17	1.01	1.019	0.976	0.975	0.982	1.005	1.029	1.064	0.969	NA	NA	NA	NA	NA	NA	NA
SPCPB16A4.02c	1.01	1.101	1.025	1.155	1.108	1.194	0.995	1.086	1.041	NA	NA	NA	NA	NA	NA	NA
SPBC31F10.09c	1.009	0.972	0.861	0.932	1.022	1.272	1.135	0.815	1.032	NA	NA	NA	NA	NA	NA	NA
SPBC359.04c	1.009	0.928	0.962	1.092	0.862	0.89	0.905	0.784	0.954	NA	NA	NA	NA	NA	NA	NA
SPCC162.03	1.009	1.045	0.998	1.125	1.061	1.124	0.918	1.025	0.943	NA	NA	NA	NA	NA	NA	NA
SPCC1795.03	1.009	0.855	1.027	0.854	0.889	0.869	0.916	0.86	1.171	NA	NA	NA	NA	NA	NA	NA
SPAC1039.03	1.008	1.053	1.073	1.017	0.987	0.97	1.083	1.004	0.953	NA	NA	NA	NA	NA	NA	NA
SPAC24B11.08c	1.008	1.002	0.909	0.867	1.078	0.997	0.961	1.095	0.929	NA	NA	NA	NA	NA	NA	NA
SPAC25H1.03	1.008	0.943	1.032	0.942	0.918	0.854	0.944	0.905	1.397	NA	NA	NA	NA	NA	NA	NA
SPAC25H1.03	1.008	0.943	1.032	0.942	0.918	0.854	0.944	0.905	1.311	NA	NA	NA	NA	NA	NA	NA
SPAC25H1.03	1.008	0.943	1.032	0.942	0.918	0.854	0.944	0.905	1.243	NA	NA	NA	NA	NA	NA	NA
SPAC25H1.03	1.008	0.943	1.032	0.942	0.918	0.854	0.944	0.905	1.305	NA	NA	NA	NA	NA	NA	NA
SPAC3C7.14c	1.008	1.001	0.918	1.314	1.052	1.244	0.881	0.832	1.072	NA	NA	NA	NA	NA	NA	NA
SPAC4F10.20	1.008	0.963	1.015	0.926	0.932	0.882	1.009	0.806	0.973	NA	NA	NA	NA	NA	NA	NA
SPAC688.12c	1.008	0.992	0.923	0.951	1.003	0.955	0.969	0.985	0.919	NA	NA	NA	NA	NA	NA	NA
SPBC947.03c	1.008	0.976	1.162	1.167	1.045	0.987	1.037	1.215	1.487	NA	NA	NA	NA	NA	NA	NA
SPAC1527.02	1.007	0.998	0.946	0.999	0.968	0.895	0.943	1.102	1.414	NA	NA	NA	NA	NA	NA	NA
SPAC26A3.01	1.007	1.052	1.153	1.022	1.014	0.965	1.144	0.96	0.906	NA	NA	NA	NA	NA	NA	NA
SPAC29E6.10c	1.007	0.989	1	0.936	0.949	0.962	1.088	0.86	1.004	NA	NA	NA	NA	NA	NA	NA
SPAP7G5.04c	1.007	1.043	1.664	1.127	1.029	1.141	1.455	1.218	1.211	NA	NA	NA	NA	NA	NA	NA
SPBC19F8.04c	1.007	1.021	1.042	1.025	1.029	1.012	1.024	0.978	0.909	NA	NA	NA	NA	NA	NA	NA
SPBC3B8.06	1.007	1.084	0.996	1.157	1.129	1.076	1.043	1.07	0.873	NA	NA	NA	NA	NA	NA	NA
SPAC1002.05c	1.006	1.089	0.989	1.128	1.137	1.144	1.04	1.062	0.925	NA	NA	NA	NA	NA	NA	NA
SPAC13A11.03	1.006	1.007	1.027	1.026	1.025	1.027	0.997	0.735	0.587	NA	1	NA	1	NA	NA	NA
SPAC1834.09	1.006	0.974	1.073	0.986	0.969	0.917	1.101	0.826	0.706	NA	NA	NA	NA	NA	NA	NA
SPAC1952.07	1.006	1.019	1.206	1.126	1.02	1.042	1.129	0.966	1.007	NA	NA	NA	NA	NA	NA	NA
SPAC328.09	1.006	1.006	0.994	0.928	0.979	0.935	1.044	0.98	0.889	NA	NA	NA	NA	NA	NA	NA
SPAC6F6.04c	1.006	0.988	1.062	0.937	0.955	0.991	1.016	0.835	0.871	NA	NA	NA	NA	NA	NA	NA
SPBPB10D8.06c	1.006	0.998	1.044	1.051	1.053	1.048	1.026	0.657	0.655	NA	1	NA	1	NA	NA	NA
SPCC757.11c	1.006	1.022	1.084	0.925	0.934	0.825	1.139	0.961	0.853	NA	NA	NA	NA	NA	NA	NA
SPAC17A5.01	1.005	1.269	0.855	1.09	1.339	0.936	0.881	1.065	0.874	NA	NA	NA	NA	NA	NA	NA
SPAC1F5.03c	1.005	1.026	0.961	0.884	0.919	0.759	0.951	0.911	0.933	NA	NA	NA	NA	NA	NA	NA
SPAC23H3.04	1.005	0.959	0.997	0.966	1.017	1.033	1.011	2.038	1.129	NA	NA	NA	NA	NA	NA	NA
SPAC6B12.09	1.005	0.922	0.754	0.81	0.816	0.703	0.702	0.961	1.202	NA	NA	NA	NA	NA	NA	NA
SPBC354.09c	1.005	1.004	1.124	0.988	1.001	1.027	1.11	1.17	1.264	NA	NA	NA	NA	NA	NA	NA
SPBP16F5.03c	1.005	1.018	1.326	1.455	0.999	1.146	1.064	0.928	1.381	NA	NA	NA	NA	NA	NA	NA
SPAC1002.12c	1.004	0.997	1.056	1.01	1.001	1.022	0.999	1.016	0.977	NA	NA	NA	NA	NA	NA	NA
SPAC1002.20	1.004	0.968	1.017	1.037	0.974	1.037	0.929	0.957	0.834	NA	NA	NA	NA	NA	NA	NA
SPAC11D3.10	1.004	1.028	1.132	1.174	1.05	1.169	0.974	1.045	1.009	NA	NA	NA	NA	NA	NA	NA
SPAC1486.02c	1.004	0.982	0.828	0.855	1.034	0.941	0.825	1.672	1.215	NA	NA	NA	NA	NA	NA	NA
SPAC31G5.17c	1.004	1.131	1.06	1.172	1.104	1.179	1.065	0.981	1.136	NA	NA	NA	NA	NA	NA	NA
SPAC3G6.11	1.004	0.983	1.163	0.97	0.951	0.906	1.196	0.945	0.952	NA	NA	NA	NA	NA	NA	NA
SPAC6C3.05	1.004	0.988	1.051	0.987	0.969	0.979	1.042	0.733	0.562	NA	1	NA	1	NA	NA	NA
SPBC15C4.01c	1.004	1.011	0.894	1.042	1.017	1.012	0.937	1.009	0.841	NA	NA	NA	NA	NA	NA	NA
SPBC1683.12	1.004	1.031	0.977	1.047	1.099	1.03	1.026	0.844	1.018	NA	NA	NA	NA	NA	NA	NA
SPBC19C2.10	1.004	0.973	0.953	1.049	0.958	0.937	0.935	0.866	0.871	NA	NA	NA	NA	NA	NA	NA
SPBC3E7.08c	1.004	1.008	0.978	0.981	0.973	0.957	1.004	1.239	1.317	NA	NA	NA	NA	NA	NA	NA
SPBC4.06	1.004	0.99	0.995	0.97	0.978	0.932	0.966	0.974	0.92	NA	NA	NA	NA	NA	NA	NA
SPBP4H10.04	1.004	1.042	1.013	1.14	1.114	1.133	1.066	1.024	1.33	NA	NA	NA	NA	NA	NA	NA
SPCC330.12c	1.004	0.946	1.022	0.952	0.983	0.946	1.023	0.31	1.174	NA	NA	NA	NA	NA	NA	NA
SPCC70.03c	1.004	0.986	1.027	0.961	0.974	0.935	1.07	0.977	0.977	NA	NA	NA	NA	NA	NA	NA
SPAC17G6.17	1.003	1.02	0.982	0.99	1.025	0.984	1.005	0.931	1.11	NA	NA	NA	NA	NA	NA	1
SPAC144.14	1.003	0.947	0.916	0.937	0.964	0.93	1.061	0.964	0.981	NA	NA	NA	NA	NA	NA	NA
SPAC14C4.07	1.003	0.878	1.15	0.939	0.858	0.936	1.125	0.832	0.929	NA	NA	NA	NA	NA	NA	NA
SPAC222.14c	1.003	1.006	1.03	0.984	1.024	1.083	1.071	1.023	0.975	NA	NA	NA	NA	NA	NA	NA
SPAC25H1.06	1.003	0.99	1.097	0.997	1.025	1.016	1.099	1.111	0.976	NA	NA	NA	NA	NA	NA	NA
SPAC328.06	1.003	1.01	1.121	1.107	0.99	1.048	1.052	0.962	1.129	NA	NA	NA	NA	NA	NA	NA
SPAC3G9.01	1.003	0.977	1.05	1.023	0.922	1.014	1.013	1.005	0.943	NA	NA	NA	NA	NA	NA	NA
SPAC4G8.05	1.003	0.971	0.961	0.802	0.923	0.829	1.037	1.012	0.959	NA	NA	NA	NA	NA	NA	NA
SPBC1198.12	1.003	1.029	0.935	1.076	1.041	0.986	0.908	1	0.969	NA	NA	NA	NA	NA	NA	NA
SPBC1709.05	1.003	1.019	1.159	0.916	0.948	0.796	0.994	1.046	0.988	NA	NA	NA	NA	NA	NA	NA
SPCC24B10.08c	1.003	1.047	0.982	0.972	1.048	1.012	1.043	1.197	1.427	NA	NA	NA	NA	NA	NA	NA
SPBC336.14c	1.002	1.017	1.171	1.265	0.944	0.96	1.009	1.023	0.986	NA	NA	NA	NA	NA	NA	1
SPBC428.12c	1.002	0.975	1.115	0.955	0.945	1.008	1.124	0.97	0.897	NA	NA	NA	NA	NA	NA	1
SPAC26A3.11	1.002	1.15	1.071	1.223	1.181	1.125	1.065	1.125	0.911	NA	NA	NA	NA	NA	NA	NA
SPAC3H8.05c	1.002	0.903	1.026	0.967	0.929	1.002	0.998	1.207	1.214	NA	NA	NA	NA	NA	NA	NA
SPAPB8E5.02c	1.002	1.044	1.023	0.956	0.987	0.953	1	0.937	0.827	NA	NA	NA	NA	NA	NA	NA
SPCC330.03c	1.002	0.944	1.065	1.091	0.954	1.088	0.963	0.981	0.945	NA	NA	NA	NA	NA	NA	NA
SPCC364.05	1.002	1.013	1.232	1.288	1.047	1.614	0.976	1.141	1.349	NA	NA	NA	NA	NA	NA	NA
SPAC30D11.14c	1.001	1.001	1.068	0.992	0.887	1.011	1.031	1.116	0.979	NA	NA	NA	NA	NA	NA	1
SPBC336.10c	1.001	0.909	1.034	0.965	0.983	0.932	1.069	1.055	0.885	NA	NA	NA	NA	NA	NA	1
SPAC19G12.13c	1.001	1.007	1.063	0.989	1.015	1.005	1.023	0.622	0.64	NA	1	NA	1	NA	NA	NA
SPAC1F7.01c	1.001	0.96	0.922	0.939	0.981	0.846	0.953	1.199	1.466	NA	NA	NA	NA	NA	NA	NA
SPAC29E6.01	1.001	1.126	0.98	0.972	1.211	1.055	0.816	0.941	0.912	NA	NA	NA	NA	NA	NA	NA
SPAC4A8.02c	1.001	0.941	0.991	0.885	0.866	0.843	0.98	0.96	0.907	NA	NA	NA	NA	NA	NA	NA
SPAPB24D3.07c	1.001	1.03	0.979	1.04	1.037	1.016	1.036	0.979	0.961	NA	NA	NA	NA	NA	NA	NA
SPBC18H10.16	1.001	1.01	0.988	0.951	1.012	0.987	0.916	0.888	0.927	NA	NA	NA	NA	NA	NA	NA
SPBC405.05	1.001	0.903	0.897	0.901	0.919	0.852	0.918	0.974	0.959	NA	NA	NA	NA	NA	NA	NA
SPCC191.10	1.001	0.99	1.071	0.978	0.944	0.957	1.04	0.998	0.997	NA	NA	NA	NA	NA	NA	NA
SPCC569.07	1.001	1.005	1.087	0.944	0.932	1.003	1.079	1.039	0.84	NA	NA	NA	NA	NA	NA	NA
SPCC825.01	1.001	1.025	1.007	0.912	1.009	0.918	0.981	1.068	1.155	NA	NA	NA	NA	NA	NA	NA
SPAC1952.05	1	0.842	0.855	1.042	0.878	0.97	0.99	1.085	1.727	NA	NA	NA	NA	NA	NA	NA
SPAC3A12.03c	1	1.032	0.98	0.993	0.98	0.915	1.007	0.934	0.857	NA	NA	NA	NA	NA	NA	NA
SPAPB1E7.05	1	0.914	1.007	0.963	0.943	1.014	1.005	0.871	0.925	NA	NA	NA	NA	NA	NA	NA
SPBC29B5.04c	1	0.968	0.984	0.989	1.031	1.077	1.057	0.956	0.956	NA	NA	NA	NA	NA	NA	NA
SPBC6B1.09c	1	0.945	1.005	1.098	0.952	1.03	0.957	0.922	0.893	NA	NA	NA	NA	NA	NA	NA
SPCC1259.14c	1	1.042	1.087	1.149	1.092	1.182	0.98	0.989	1.05	NA	NA	NA	NA	NA	NA	NA
SPCC4G3.02	1	0.981	1.018	1.17	1.058	1.174	0.954	1.008	1.131	NA	NA	NA	NA	NA	NA	NA
SPAC11E3.14	0.999	0.983	0.953	1.042	1.051	0.995	0.991	0.972	0.868	NA	NA	NA	NA	NA	NA	NA
SPAC1565.01	0.999	1.036	0.954	1.071	1.103	1.081	0.908	1.064	0.597	NA	NA	NA	NA	NA	NA	NA
SPAC16E8.18	0.999	1.025	1.058	1.185	1.089	1.128	1.036	0.98	1.124	NA	NA	NA	NA	NA	NA	NA
SPAC25A8.01c	0.999	0.995	1.102	1.013	0.95	0.996	0.956	1.052	1.053	NA	NA	NA	NA	NA	NA	NA
SPAC26A3.02	0.999	1.126	0.973	0.942	1.018	0.942	1	0.956	0.92	NA	NA	NA	NA	NA	NA	NA
SPAC2F7.02c	0.999	0.949	1.115	1.019	0.959	0.961	1.009	0.856	0.939	NA	NA	NA	NA	NA	NA	NA
SPAC5H10.02c	0.999	0.986	0.963	1.12	0.94	0.941	0.964	0.802	0.904	NA	NA	NA	NA	NA	NA	NA
SPAC9.12c	0.999	1.002	1.185	1.39	1.082	1.355	1.126	0.446	0.53	NA	1	NA	NA	1	NA	NA
SPBC1711.11	0.999	1	1.126	0.986	1.031	0.978	1.121	1.008	0.966	NA	NA	NA	NA	NA	NA	NA
SPBC19F8.01c	0.999	0.966	0.963	1.016	0.968	0.987	0.945	1.028	0.957	NA	NA	NA	NA	NA	NA	NA
SPBC29A3.09c	0.999	0.954	1.083	1.098	1.016	1.092	0.998	0.965	0.924	NA	NA	NA	NA	NA	NA	NA
SPCC576.17c	0.999	0.885	0.864	0.996	0.916	0.937	0.878	0.753	0.986	NA	NA	NA	NA	NA	NA	NA
SPAC30.01c	0.998	1.019	1.068	0.969	0.971	1.021	1.055	1.102	1.28	NA	NA	NA	NA	NA	NA	NA
SPCC1442.13c	0.998	0.957	0.959	0.993	1.008	1.039	1.004	0.999	1.074	NA	NA	NA	NA	NA	NA	NA
SPCC338.14	0.998	0.998	1.092	0.927	0.902	0.754	1.103	0.946	0.865	NA	NA	NA	NA	NA	NA	NA
SPCC736.02	0.998	0.956	1.044	0.983	0.993	0.986	1.136	0.739	0.638	NA	1	NA	1	NA	NA	NA
SPAC1142.02c	0.997	0.981	0.985	0.899	0.943	0.868	1.021	0.895	0.786	NA	NA	NA	NA	NA	NA	NA
SPAC20H4.03c	0.997	0.922	1.269	1.066	0.939	1.062	1.12	1.022	1.502	NA	NA	NA	NA	NA	NA	NA
SPAC30.02c	0.997	0.981	1.106	0.948	0.895	1.04	1.096	0.956	1.035	NA	NA	NA	NA	NA	NA	NA
SPAC8F11.10c	0.997	0.97	0.978	0.961	0.989	0.948	0.964	0.872	1.03	NA	NA	NA	NA	NA	NA	NA
SPBC1683.06c	0.997	0.978	0.977	0.953	0.944	0.912	1.036	1.014	0.99	NA	NA	NA	NA	NA	NA	NA
SPBC28E12.04	0.997	0.971	0.923	1.03	0.973	1.048	1.065	0.346	0.343	NA	1	NA	1	NA	NA	NA
SPBC577.13	0.997	1.03	1.02	1.091	1.011	0.994	0.997	0.95	0.886	NA	NA	NA	NA	NA	NA	NA
SPCC1235.02	0.997	0.98	1.126	0.974	0.934	1.008	1.14	1.03	1.097	NA	NA	NA	NA	NA	NA	NA
SPAC222.08c	0.996	0.958	0.948	0.938	0.878	0.773	0.984	1.665	1.281	NA	NA	NA	NA	NA	NA	NA
SPAC6G9.14	0.995	1.194	0.89	0.835	1.264	0.958	1.548	1.128	0.809	NA	NA	NA	NA	NA	NA	1
SPAC16E8.13	0.995	0.983	0.972	1.061	1.051	1.092	0.939	0.782	1.044	NA	NA	NA	NA	NA	NA	NA
SPAC17H9.06c	0.995	1.04	1.035	1.016	1.067	1.06	1.089	0.941	0.92	NA	NA	NA	NA	NA	NA	NA
SPAC343.20	0.995	1.02	0.947	0.898	0.97	0.928	1.009	1.017	0.909	NA	NA	NA	NA	NA	NA	NA
SPAC644.13c	0.995	0.966	1.06	0.948	0.995	1.013	1.109	1.063	1.046	NA	NA	NA	NA	NA	NA	NA
SPBC11C11.11c	0.995	1.076	1.008	1.013	1.123	0.961	0.856	0.895	0.935	NA	NA	NA	NA	NA	NA	NA
SPBC1709.04c	0.995	0.98	1.107	1.064	0.967	1.115	1.013	1.026	1.017	NA	NA	NA	NA	NA	NA	NA
SPBC1773.14	0.995	0.929	1.047	0.895	0.857	0.923	1.048	0.801	0.784	NA	NA	NA	NA	NA	NA	NA
SPBC21D10.07	0.995	1.007	0.99	0.964	0.974	0.922	1.051	1.031	0.957	NA	NA	NA	NA	NA	NA	NA
SPBC29A3.21	0.995	0.957	1.065	1.098	0.997	1.098	0.993	1.036	1.027	NA	NA	NA	NA	NA	NA	NA
SPBC4C3.04c	0.995	0.986	1.174	1.045	0.939	1.012	1.087	0.923	0.908	NA	NA	NA	NA	NA	NA	NA
SPCC4G3.09c	0.995	1.116	1.06	1.169	1.197	1.238	1.083	0.941	0.987	NA	NA	NA	NA	NA	NA	NA
SPAC12B10.14c	0.994	0.993	1.017	0.892	0.917	0.871	0.972	0.983	0.858	NA	NA	NA	NA	NA	NA	NA
SPAC1687.21	0.994	0.998	0.863	0.968	0.989	0.923	0.936	1.027	1.046	NA	NA	NA	NA	NA	NA	NA
SPAC18B11.10	0.994	1.005	0.988	0.899	0.993	1.028	1.01	0.938	0.723	NA	NA	NA	NA	NA	NA	NA
SPAC24H6.13	0.994	0.984	0.846	0.887	1	0.859	0.927	0.918	0.855	NA	NA	NA	NA	NA	NA	NA
SPAC6G9.10c	0.994	0.955	1.174	0.955	0.907	1.022	1.097	1.225	1.077	NA	NA	NA	NA	NA	NA	NA
SPAC750.08c	0.994	1.003	0.965	0.92	0.998	0.913	1.013	1.024	0.96	NA	NA	NA	NA	NA	NA	NA
SPBC17D11.02c	0.994	1.023	0.908	1.056	0.989	1.092	0.9	0.827	0.985	NA	NA	NA	NA	NA	NA	NA
SPBC17D11.03c	0.994	0.951	0.943	0.989	0.999	0.977	1.016	1.068	1.111	NA	NA	NA	NA	NA	NA	NA
SPAC140.03	0.993	1.116	1.142	1.538	1.233	1.434	1.173	1.589	1.842	NA	NA	NA	NA	NA	NA	NA
SPAC1687.14c	0.993	0.939	0.855	1.006	0.983	1.034	0.957	0.954	1.057	NA	NA	NA	NA	NA	NA	NA
SPAC25G10.04c	0.993	0.963	1.03	0.953	0.961	1.082	1.048	0.553	1.076	NA	NA	NA	NA	NA	NA	NA
SPAC4D7.02c	0.993	1.069	1.02	1.065	1.078	1.096	1.029	0.982	0.997	NA	NA	NA	NA	NA	NA	NA
SPAC4H3.14c	0.993	1.003	0.998	1.007	0.979	0.877	0.989	0.982	0.822	NA	NA	NA	NA	NA	NA	NA
SPAPB1A10.05	0.993	1.053	1.077	1.071	1.068	1.139	1.003	0.989	0.957	NA	NA	NA	NA	NA	NA	NA
SPBC13G1.04c	0.993	0.924	0.809	1.003	0.872	0.953	0.827	0.788	0.834	NA	NA	NA	NA	NA	NA	NA
SPBC25H2.14	0.993	1.014	0.937	0.972	0.997	0.957	0.938	1.036	0.948	NA	NA	NA	NA	NA	NA	NA
SPBC3E7.11c	0.993	1.027	1.014	0.952	1.017	1.007	1.088	0.934	0.837	NA	NA	NA	NA	NA	NA	NA
SPBC405.04c	0.993	0.952	1.039	0.964	0.959	0.956	1.13	0.982	1.076	NA	NA	NA	NA	NA	NA	NA
SPBC409.08	0.993	0.983	0.954	0.927	0.933	0.863	0.931	0.908	0.811	NA	NA	NA	NA	NA	NA	NA
SPCC364.06	0.993	1.072	1.251	0.984	1.031	0.861	1.321	0.967	1.303	NA	NA	NA	NA	NA	NA	NA
SPAC11D3.16c	0.992	0.957	0.921	0.99	0.976	0.891	0.98	0.939	0.823	NA	NA	NA	NA	NA	NA	NA
SPAC17H9.10c	0.992	1.016	1.104	1.304	1.112	1.169	1.112	0.898	0.816	NA	NA	NA	NA	NA	NA	NA
SPAC27F1.05c	0.992	1.104	1.076	1.292	1.284	1.41	0.922	0.498	0.514	NA	1	NA	1	NA	NA	NA
SPBC1773.05c	0.992	1.004	1.035	1.022	0.928	0.983	0.989	1.018	0.951	NA	NA	NA	NA	NA	NA	NA
SPCC18B5.06	0.992	1.026	0.862	1.045	1.075	1.035	0.918	1.008	0.788	NA	NA	NA	NA	NA	NA	NA
SPAC11E3.08c	0.991	0.844	0.858	0.71	0.647	0.484	0.781	1.231	1.091	NA	NA	NA	NA	NA	NA	NA
SPAC1D4.09c	0.991	1.001	1.059	0.961	0.983	0.973	1.005	0.949	1.194	NA	NA	NA	NA	NA	NA	NA
SPAC24H6.11c	0.991	1.022	1.137	1.026	0.979	1.064	1.044	0.903	0.888	NA	NA	NA	NA	NA	NA	NA
SPAC26H5.05	0.991	0.916	0.95	0.837	0.868	0.856	0.897	0.824	1.023	NA	NA	NA	NA	NA	NA	NA
SPBC1105.05	0.991	0.974	1	0.877	0.822	0.635	0.865	0.949	0.833	NA	NA	NA	NA	NA	NA	NA
SPBC1711.06	0.991	1.07	1.087	1.033	0.986	0.807	1.072	1.115	1.161	NA	NA	NA	NA	NA	NA	NA
SPBC1778.09	0.991	0.894	1.087	0.872	0.913	0.851	0.885	0.967	1.312	NA	NA	NA	NA	NA	NA	NA
SPBC21C3.17c	0.991	1.008	1	0.963	0.985	0.952	1.052	1.033	0.852	NA	NA	NA	NA	NA	NA	NA
SPCC188.12	0.991	0.966	0.955	1.067	0.983	1.107	0.976	1.105	1.014	NA	NA	NA	NA	NA	NA	NA
SPCC584.11c	0.991	0.855	0.896	0.952	0.95	0.976	0.845	1.362	1.477	NA	NA	NA	NA	NA	NA	NA
SPCC622.08c	0.991	1.055	1.189	0.917	1.007	0.903	1.002	0.985	0.961	NA	NA	NA	NA	NA	NA	NA
SPAC11E3.13c	0.99	1.111	1.061	1.188	1.129	1.19	0.945	1.118	1.006	NA	NA	NA	NA	NA	NA	NA
SPAC144.06	0.99	1.064	1.248	1.051	1.089	1.133	1.037	0.918	0.837	NA	NA	NA	NA	NA	NA	NA
SPAC6F6.17	0.99	1.035	0.927	0.953	0.984	0.934	1.026	1.025	1.122	NA	NA	NA	NA	NA	NA	NA
SPBC1539.07c	0.99	1.015	1.004	0.9	0.991	0.748	0.942	1.017	1.005	NA	NA	NA	NA	NA	NA	NA
SPBC36B7.06c	0.99	1.003	0.967	0.953	0.926	0.959	1.01	0.971	0.87	NA	NA	NA	NA	NA	NA	NA
SPBC725.15	0.99	1.037	1.053	0.94	1.005	0.882	1.088	0.958	1.213	NA	NA	NA	NA	NA	NA	NA
SPCC1827.08c	0.99	1.101	1.08	1.228	1.108	1.252	1.023	0.995	0.999	NA	NA	NA	NA	NA	NA	NA
SPCC74.04	0.99	0.997	0.987	0.945	0.978	1.005	1.066	0.927	0.8	NA	NA	NA	NA	NA	NA	NA
SPCP1E11.07c	0.99	1.1	1.082	1.419	1.174	1.309	1.113	0.961	1.112	NA	NA	NA	NA	NA	NA	NA
SPAC4G9.02	0.989	0.944	1.022	1.007	0.916	0.972	0.948	0.875	0.857	NA	NA	NA	NA	NA	NA	1
SPAC2F3.11	0.989	1.033	1.028	0.98	1.031	0.95	1.048	1.059	0.818	NA	NA	NA	NA	NA	NA	NA
SPAC977.11	0.989	0.929	1.023	0.895	0.889	0.883	1.064	0.967	0.891	NA	NA	NA	NA	NA	NA	NA
SPBC17A3.02	0.989	0.968	1.014	0.964	0.985	0.974	1.011	0.866	1.166	NA	NA	NA	NA	NA	NA	NA
SPBC18E5.05c	0.989	0.863	1.021	0.92	0.789	0.855	1.031	0.933	0.945	NA	NA	NA	NA	NA	NA	NA
SPBC530.03c	0.989	0.962	0.922	0.936	0.906	0.945	0.97	1.008	0.901	NA	NA	NA	NA	NA	NA	NA
SPCC1223.01	0.989	0.933	0.92	0.939	1.037	0.98	0.981	1.082	1.625	NA	NA	NA	NA	NA	NA	NA
SPCC18.01c	0.989	0.912	1.024	0.999	1.006	1.013	1.06	0.961	1.077	NA	NA	NA	NA	NA	NA	NA
SPAC10F6.06	0.988	0.969	1.097	1.107	0.895	1.029	1.087	0.974	1.073	NA	NA	NA	NA	NA	NA	1
SPAC2G11.13	0.988	0.922	1.074	0.965	0.915	0.973	0.985	0.958	0.992	NA	NA	NA	NA	NA	NA	NA
SPAC4F10.14c	0.988	1.052	0.928	1.118	1.097	1.11	0.877	1.003	1.217	NA	NA	NA	NA	NA	NA	NA
SPAC630.10	0.988	1.002	1.093	0.955	0.908	0.796	1.073	0.964	0.891	NA	NA	NA	NA	NA	NA	NA
SPAC9E9.05	0.988	1.038	1.08	1.039	1.025	1.017	1.091	0.949	0.895	NA	NA	NA	NA	NA	NA	NA
SPBC12D12.02c	0.988	1.034	0.96	0.948	0.985	0.815	1.011	0.923	0.851	NA	NA	NA	NA	NA	NA	NA
SPBC1718.02	0.988	0.983	1.044	0.909	1.007	1.005	1.043	0.936	0.877	NA	NA	NA	NA	NA	NA	NA
SPBC29B5.02c	0.988	0.993	0.965	0.94	0.986	0.989	1.015	0.994	0.89	NA	NA	NA	NA	NA	NA	NA
SPBC3D6.06c	0.988	1.059	0.957	0.927	1.066	0.863	0.912	0.946	1.042	NA	NA	NA	NA	NA	NA	NA
SPCC1753.03c	0.988	1.011	1.099	1.133	1.014	1.186	1.026	1.084	1.063	NA	NA	NA	NA	NA	NA	NA
SPAC11H11.01	0.987	0.957	0.963	1.057	0.938	0.975	0.979	0.911	0.925	NA	NA	NA	NA	NA	NA	NA
SPAC16E8.14c	0.987	1.018	1.008	0.951	1.01	0.93	1.052	1.006	0.859	NA	NA	NA	NA	NA	NA	NA
SPAC27D7.12c	0.987	1.1	1.011	1.327	1.109	1.253	1.021	1	1.083	NA	NA	NA	NA	NA	NA	NA
SPAC5H10.06c	0.987	1.067	0.992	1.073	1.117	1.051	0.948	1.041	0.812	NA	NA	NA	NA	NA	NA	NA
SPBC1347.07	0.987	1.023	1.096	0.965	0.994	0.975	1.083	0.961	0.927	NA	NA	NA	NA	NA	NA	NA
SPBC18E5.14c	0.987	0.917	1.01	1.052	0.964	1.087	1.008	0.981	0.925	NA	NA	NA	NA	NA	NA	NA
SPBC8D2.17	0.987	0.989	1.118	0.979	0.994	0.87	1.021	1.292	1.067	NA	NA	NA	NA	NA	NA	NA
SPCC18B5.05c	0.987	1.009	1.094	1.016	1.002	1.017	1.003	0.996	0.886	NA	NA	NA	NA	NA	NA	NA
SPAC27F1.03c	0.986	0.956	0.989	0.92	0.966	0.966	1.062	0.945	0.867	NA	NA	NA	NA	NA	NA	NA
SPAC57A10.04	0.986	0.978	0.954	1.034	0.988	1.008	0.931	0.945	0.932	NA	NA	NA	NA	NA	NA	NA
SPAPYUG7.04c	0.986	0.957	1.065	1.016	0.924	1.081	1.011	1.119	1.088	NA	NA	NA	NA	NA	NA	NA
SPBC14F5.10c	0.986	1.022	1.033	0.96	0.985	0.859	1.064	1.112	1.535	NA	NA	NA	NA	NA	NA	NA
SPBC1685.13	0.986	0.922	1.057	0.962	0.918	0.964	0.961	0.916	0.876	NA	NA	NA	NA	NA	NA	NA
SPBC83.16c	0.986	0.947	0.793	0.939	0.952	0.873	0.88	0.929	0.881	NA	NA	NA	NA	NA	NA	NA
SPCC306.05c	0.986	0.942	1.049	0.961	0.91	0.902	1.169	0.91	0.813	NA	NA	NA	NA	NA	NA	NA
SPCC63.06	0.986	1.018	1.148	0.996	0.919	1.076	1.246	1.065	0.887	NA	NA	NA	NA	NA	NA	NA
SPCC70.06	0.986	0.981	0.987	0.944	0.914	0.961	1.035	0.933	1.295	NA	NA	NA	NA	NA	NA	NA
SPCC777.06c	0.986	1.037	1.094	0.982	1.025	0.981	1.087	1.049	0.921	NA	NA	NA	NA	NA	NA	NA
SPCC830.10	0.986	0.984	0.871	0.986	1.011	1.004	0.995	1.025	1.081	NA	NA	NA	NA	NA	NA	NA
SPCP31B10.05	0.986	0.878	0.85	1.027	0.928	0.942	0.889	0.826	0.864	NA	NA	NA	NA	NA	NA	NA
SPAC3H8.09c	0.985	1.01	1.055	1.033	1.046	1.043	1.009	0.456	0.417	NA	1	NA	1	NA	NA	1
SPAC343.19	0.985	1.092	1.14	1.309	1.086	1.373	1.115	0.935	1.068	NA	NA	NA	NA	NA	NA	NA
SPAC9.10	0.985	0.992	0.907	0.904	1.059	1.223	1.04	0.86	1.068	NA	NA	NA	NA	NA	NA	NA
SPAC9G1.08c	0.985	0.96	1.111	0.977	1.035	1.027	1.14	0.982	0.88	NA	NA	NA	NA	NA	NA	NA
SPAPB24D3.08c	0.985	1.027	0.989	1.022	1.025	1.024	1.005	1.01	0.958	NA	NA	NA	NA	NA	NA	NA
SPBC106.17c	0.985	0.961	1.069	0.961	0.971	0.947	1.053	0.431	0.685	NA	1	NA	1	NA	NA	NA
SPBC21H7.06c	0.985	1.1	1.044	0.922	0.965	0.727	1.052	0.901	0.965	NA	NA	NA	NA	NA	NA	NA
SPBC947.09	0.985	1.081	1.065	1.19	1.165	1.249	0.935	1.124	1.074	NA	NA	NA	NA	NA	NA	NA
SPCC13B11.03c	0.985	1.022	0.943	1.042	1.083	1.054	0.973	0.951	0.854	NA	NA	NA	NA	NA	NA	NA
SPCC2H8.05c	0.985	0.937	1.05	0.999	0.933	0.977	1.044	1.041	0.928	NA	NA	NA	NA	NA	NA	NA
SPAC1687.22c	0.984	1.035	0.999	0.922	1.038	0.89	0.993	0.935	0.653	NA	NA	NA	NA	NA	NA	1
SPAC732.02c	0.984	1.03	1.03	1.162	1.08	1.156	0.937	1.356	0.404	NA	NA	NA	NA	NA	NA	NA
SPBC16C6.08c	0.984	1.037	1.035	1.03	1.065	1.109	1.13	0.902	0.788	NA	NA	NA	NA	NA	NA	NA
SPBC4F6.09	0.984	0.949	1.065	0.94	0.913	1.033	1.112	0.951	0.879	NA	NA	NA	NA	NA	NA	NA
SPBPB10D8.04c	0.984	0.97	0.957	0.95	0.959	0.932	0.991	0.944	0.912	NA	NA	NA	NA	NA	NA	NA
SPCC1322.02	0.984	0.945	0.974	1.013	0.923	0.951	0.949	0.929	1.006	NA	NA	NA	NA	NA	NA	NA
SPCC18.15	0.984	0.911	1.173	1.019	0.984	1.052	1.043	1.044	1.363	NA	NA	NA	NA	NA	NA	NA
SPAC10F6.04	0.983	1.033	0.945	0.999	1.02	0.99	0.973	1.026	0.93	NA	NA	NA	NA	NA	NA	NA
SPAC144.01	0.983	1.062	1.114	1.202	1.122	1.265	1.052	0.807	1.017	NA	NA	NA	NA	NA	NA	NA
SPAC22F3.04	0.983	1.032	1.051	0.894	0.945	0.96	1.059	1.022	0.892	NA	NA	NA	NA	NA	NA	NA
SPAC25H1.05	0.983	1.035	0.973	1.025	1.038	1.041	0.959	1.204	1.615	NA	NA	NA	NA	NA	NA	NA
SPAC644.08	0.983	0.962	1.01	1.233	1.018	1.128	1.011	1.049	1.551	NA	NA	NA	NA	NA	NA	NA
SPAC869.09	0.983	1.03	0.975	0.995	1.004	1.005	0.987	0.905	0.916	NA	NA	NA	NA	NA	NA	NA
SPBC1198.03c	0.983	1.115	1.055	1.327	1.119	1.24	1.061	1.01	0.989	NA	NA	NA	NA	NA	NA	NA
SPBC1271.01c	0.983	0.998	1.162	0.986	1.011	1.011	1.159	0.969	0.951	NA	NA	NA	NA	NA	NA	NA
SPBC32F12.07c	0.983	0.815	0.979	1.012	0.986	1.088	0.977	0.651	0.775	NA	1	NA	1	NA	NA	NA
SPAC11H11.03c	0.982	0.964	0.972	0.98	0.956	1.04	0.982	1.064	1.004	NA	NA	NA	NA	NA	NA	NA
SPAC3H8.04	0.982	0.97	1.029	0.932	0.947	0.927	1.026	1.015	0.994	NA	NA	NA	NA	NA	NA	NA
SPAC5D6.07c	0.982	0.992	1.057	1.008	0.983	1.046	1.028	1.198	1.005	NA	NA	NA	NA	NA	NA	NA
SPAC607.07c	0.982	0.972	0.978	1.127	1.011	1.053	0.999	0.829	1.019	NA	NA	NA	NA	NA	NA	NA
SPAC9.07c	0.982	0.944	0.989	0.925	0.918	0.923	0.953	0.665	0.652	NA	1	NA	1	NA	NA	NA
SPAPB17E12.02	0.982	0.985	0.946	0.935	0.98	0.902	0.91	0.965	1.081	NA	NA	NA	NA	NA	NA	NA
SPAPB1E7.04c	0.982	1.066	0.82	1.165	1.138	1.169	0.896	1.079	1.108	NA	NA	NA	NA	NA	NA	NA
SPBC1773.02c	0.982	0.991	1.017	1.016	0.914	0.974	1.039	0.969	1.102	NA	NA	NA	NA	NA	NA	NA
SPBC2G2.02	0.982	1.001	0.991	0.921	0.939	0.897	1.07	0.997	0.88	NA	NA	NA	NA	NA	NA	NA
SPBC646.06c	0.982	1.015	1.045	0.899	0.951	0.867	1.069	1.026	0.843	NA	NA	NA	NA	NA	NA	NA
SPBC902.06	0.982	0.976	0.904	1.05	1.004	0.997	0.887	1.006	0.965	NA	NA	NA	NA	NA	NA	NA
SPAC1071.08	0.981	0.959	1.016	1.019	0.932	1.037	1.068	1.085	1.039	NA	NA	NA	NA	NA	NA	NA
SPAC139.01c	0.981	0.949	0.99	0.992	0.957	0.961	0.918	0.998	1.07	NA	NA	NA	NA	NA	NA	NA
SPAC13D6.04c	0.981	0.908	0.995	0.897	0.874	0.802	1.018	0.969	0.959	NA	NA	NA	NA	NA	NA	NA
SPAC18G6.01c	0.981	0.954	1.024	1.102	0.942	1.075	0.995	0.971	1.01	NA	NA	NA	NA	NA	NA	NA
SPAC29A4.05	0.981	0.977	0.958	0.932	0.908	0.842	0.918	0.978	0.841	NA	NA	NA	NA	NA	NA	NA
SPAC31G5.11	0.981	0.877	0.809	0.943	0.9	0.908	0.884	0.624	0.848	NA	1	NA	1	NA	NA	NA
SPAP7G5.05	0.981	0.999	1.188	1.006	1.043	1.127	1.165	0.972	0.882	NA	NA	NA	NA	NA	NA	NA
SPBC30D10.05c	0.981	0.958	1.013	0.953	0.894	0.932	0.971	0.937	0.914	NA	NA	NA	NA	NA	NA	NA
SPBC3F6.01c	0.981	0.853	1.007	1.152	0.815	0.775	0.897	0.778	0.951	NA	NA	NA	NA	NA	NA	NA
SPCC188.02	0.981	1.049	0.904	0.921	1.026	0.931	0.996	1.052	1.159	NA	NA	NA	NA	NA	NA	NA
SPCP20C8.02c	0.981	0.979	0.913	0.97	1.041	0.972	0.951	0.986	1	NA	NA	NA	NA	NA	NA	NA
SPAC16A10.03c	0.98	1.021	1.32	1.101	0.974	1.334	1.107	1.005	1.598	NA	NA	NA	NA	NA	NA	NA
SPAC1B3.03c	0.98	0.993	0.966	1.116	0.979	1.101	1.013	0.917	0.95	NA	NA	NA	NA	NA	NA	NA
SPAC212.01c	0.98	1.085	1.028	1.089	1.101	1.041	1.076	0.983	0.956	NA	NA	NA	NA	NA	NA	NA
SPAC21E11.05c	0.98	1.029	0.959	0.983	0.986	0.879	0.914	0.952	0.842	NA	NA	NA	NA	NA	NA	NA
SPACUNK4.08	0.98	1.044	1.327	1.004	0.947	1.014	1.181	1.033	1.038	NA	NA	NA	NA	NA	NA	NA
SPBC1861.06c	0.98	0.968	1.062	0.934	0.934	0.907	1.083	0.937	0.867	NA	NA	NA	NA	NA	NA	NA
SPBC2A9.05c	0.98	0.926	1.02	0.923	0.896	0.86	1.093	1.039	0.94	NA	NA	NA	NA	NA	NA	NA
SPBC2F12.12c	0.98	1.016	1	1.052	1.032	1.022	0.957	1.029	1.001	NA	NA	NA	NA	NA	NA	NA
SPBC609.04	0.98	0.947	0.975	0.941	0.925	0.782	0.964	1.044	1.107	NA	NA	NA	NA	NA	NA	NA
SPBC947.01	0.98	1.027	1.153	1.222	1.048	1.224	1.114	1.15	1.118	NA	NA	NA	NA	NA	NA	NA
SPCC777.17c	0.98	1.027	0.939	0.898	0.955	0.916	0.946	0.922	0.857	NA	NA	NA	NA	NA	NA	NA
SPAC1006.04c	0.979	0.95	1.061	0.992	0.916	0.979	1.033	0.94	0.955	NA	NA	NA	NA	NA	NA	NA
SPAC1F8.08	0.979	0.895	0.945	0.995	0.939	0.97	0.936	0.904	0.916	NA	NA	NA	NA	NA	NA	NA
SPAC23C4.02	0.979	1.002	1.06	1.158	0.995	0.977	0.956	0.988	0.943	NA	NA	NA	NA	NA	NA	NA
SPAC323.01c	0.979	1.013	0.962	1	1.002	0.974	1.017	0.995	1.06	NA	NA	NA	NA	NA	NA	NA
SPAC3A12.06c	0.979	0.98	1.016	0.945	0.954	0.986	1.064	0.964	0.89	NA	NA	NA	NA	NA	NA	NA
SPAC3C7.12	0.979	0.923	1.118	0.73	0.879	0.963	1.157	0.876	1.054	NA	NA	NA	NA	NA	NA	NA
SPAC3F10.09	0.979	0.982	0.848	0.794	0.9	0.642	0.942	0.889	1.156	NA	NA	NA	NA	NA	NA	NA
SPBC56F2.14	0.979	1.028	1.15	0.967	0.965	1	1.033	0.967	0.946	NA	NA	NA	NA	NA	NA	NA
SPCC1020.06c	0.979	0.932	1.07	1.198	0.91	1.054	0.916	0.832	0.549	NA	1	NA	1	NA	NA	NA
SPCC825.04c	0.979	1.005	1.024	0.934	0.974	0.947	0.93	0.953	0.997	NA	NA	NA	NA	NA	NA	NA
SPAC637.07	0.978	0.984	1.077	1.09	0.958	0.955	0.986	0.283	0.348	NA	1	NA	1	NA	NA	1
SPAC1851.02	0.978	1.002	1.089	1.081	0.938	1.008	0.775	1.067	1.016	NA	NA	NA	NA	NA	NA	NA
SPAC3H5.04	0.978	1.039	1.168	1.093	1.05	0.97	1.152	1.007	1.003	NA	NA	NA	NA	NA	NA	NA
SPAC56F8.06c	0.978	1.058	1.099	0.959	1.012	0.998	1.028	0.814	1.042	NA	NA	NA	NA	NA	NA	NA
SPAC869.05c	0.978	0.989	1.008	1.095	1.084	1.245	0.952	1.08	1.123	NA	NA	NA	NA	NA	NA	NA
SPAC9E9.09c	0.978	1.011	1.03	0.969	1.002	0.904	1.052	0.739	1.799	NA	NA	NA	NA	NA	NA	NA
SPCC285.13c	0.978	1.059	0.044	1.139	1.099	1.115	0.848	0.583	0.612	NA	1	NA	1	NA	NA	NA
SPAC1687.19c	0.977	1.046	1.074	0.932	0.896	0.887	1.107	1.137	1.133	NA	NA	NA	NA	NA	NA	NA
SPAC19D5.07	0.977	0.97	0.925	0.965	0.947	0.955	0.94	0.992	1.212	NA	NA	NA	NA	NA	NA	NA
SPAC31G5.14	0.977	1.011	1.002	0.897	0.968	0.927	0.998	0.897	0.872	NA	NA	NA	NA	NA	NA	NA
SPBC359.06	0.977	0.98	1.16	1.46	0.995	0.892	0.921	1.125	1.031	NA	NA	NA	NA	NA	NA	NA
SPBC839.02	0.977	0.985	1.052	1.172	1.002	1.116	1	0.948	1.153	NA	NA	NA	NA	NA	NA	NA
SPBP16F5.07	0.977	0.951	0.982	0.937	0.922	0.946	1.02	0.972	0.943	NA	NA	NA	NA	NA	NA	NA
SPCC338.18	0.977	0.927	0.996	0.944	0.909	0.919	0.993	0.896	0.797	NA	NA	NA	NA	NA	NA	NA
SPCC663.03	0.977	1.005	1.025	1.044	0.943	0.705	1.034	1.005	1.123	NA	NA	NA	NA	NA	NA	NA
SPCC777.07	0.977	1.074	1.051	1.004	1.057	0.925	1.087	0.951	0.825	NA	NA	NA	NA	NA	NA	NA
SPACUNK4.12c	0.976	0.936	1.08	1.064	1.038	1.18	1.049	0.755	0.78	NA	NA	NA	NA	NA	NA	NA
SPAP14E8.02	0.976	1.011	0.972	1.092	1.051	1.016	0.909	1.054	1.394	NA	NA	NA	NA	NA	NA	NA
SPAP7G5.03	0.976	1.088	1.179	0.956	1.015	1.034	1.174	0.92	1.491	NA	NA	NA	NA	NA	NA	NA
SPBC1685.04	0.976	0.994	1.003	0.959	0.916	0.913	1.033	0.938	0.881	NA	NA	NA	NA	NA	NA	NA
SPBC1709.16c	0.976	0.997	0.89	0.928	0.995	0.853	0.988	0.974	0.866	NA	NA	NA	NA	NA	NA	NA
SPBC20F10.06	0.976	0.931	1.029	0.982	0.954	1.016	1.033	0.976	0.963	NA	NA	NA	NA	NA	NA	NA
SPBC947.04	0.976	0.97	1.068	0.946	0.949	1.023	1.111	1.063	1.367	NA	NA	NA	NA	NA	NA	NA
SPBC9B6.07	0.976	0.936	1.041	0.968	0.95	0.989	0.992	1.561	1.691	NA	NA	NA	NA	NA	NA	NA
SPAC139.05	0.975	0.931	0.973	0.91	0.898	0.903	0.912	0.894	0.838	NA	NA	NA	NA	NA	NA	NA
SPAC16E8.01	0.975	0.899	1.218	1.034	0.885	1.187	1.091	1.215	1.518	NA	NA	NA	NA	NA	NA	NA
SPAC22F3.12c	0.975	1.151	1.159	1.308	1.23	1.332	1.098	1.159	1.317	NA	NA	NA	NA	NA	NA	NA
SPAC3G6.05	0.975	0.962	1.026	0.974	0.902	0.915	1.03	0.913	1.071	NA	NA	NA	NA	NA	NA	NA
SPBC106.13	0.975	0.925	0.914	0.912	0.973	0.893	0.898	1.011	0.963	NA	NA	NA	NA	NA	NA	NA
SPBC16C6.11	0.975	0.986	1.027	1.045	1.038	1.087	0.972	1.769	1.708	NA	NA	NA	NA	NA	NA	NA
SPBC215.05	0.975	0.902	0.913	0.667	0.705	0.506	0.823	0.517	0.515	NA	1	NA	1	NA	NA	NA
SPBC32H8.02c	0.975	0.946	0.954	0.921	0.965	0.932	0.986	0.911	0.783	NA	NA	NA	NA	NA	NA	NA
SPBC16A3.06	0.974	0.989	0.877	0.907	1.011	0.983	1.004	0.976	0.857	NA	NA	NA	NA	NA	NA	1
SPAC13G7.09c	0.974	0.96	1.013	0.929	0.975	0.962	1.013	0.941	0.874	NA	NA	NA	NA	NA	NA	NA
SPAC3H8.07c	0.974	0.89	0.954	1.19	0.92	0.98	1.032	0.728	0.889	NA	NA	NA	NA	NA	NA	NA
SPBC216.01c	0.974	0.939	1.109	1.115	0.886	1.134	0.889	0.921	1.245	NA	NA	NA	NA	NA	NA	NA
SPBC428.14	0.974	1.02	0.953	1.018	1.005	1.034	0.976	1.021	1.012	NA	NA	NA	NA	NA	NA	NA
SPAC1805.06c	0.973	0.931	0.945	0.983	0.981	0.921	0.921	0.936	1.136	NA	NA	NA	NA	NA	NA	NA
SPAC1F3.10c	0.973	0.963	1.053	0.936	0.923	0.935	0.958	0.998	0.86	NA	NA	NA	NA	NA	NA	NA
SPAC30D11.02c	0.973	0.883	0.925	0.929	0.842	0.86	0.918	0.96	0.94	NA	NA	NA	NA	NA	NA	NA
SPBC609.02	0.973	1.022	1.061	0.937	1.013	0.971	1.102	0.573	0.612	NA	1	NA	1	NA	NA	NA
SPBC83.05	0.972	0.921	1.004	1.094	0.925	0.971	0.916	0.903	0.847	NA	NA	NA	NA	NA	NA	1
SPAC1805.12c	0.972	0.967	1.095	0.861	0.967	1.073	1.166	1.039	0.853	NA	NA	NA	NA	NA	NA	NA
SPAC1F7.06	0.972	0.985	0.925	1.007	0.998	1.021	0.974	0.986	0.912	NA	NA	NA	NA	NA	NA	NA
SPBC1198.09	0.972	0.938	1.053	1.245	1.012	1.223	1.034	1.01	1.393	NA	NA	NA	NA	NA	NA	NA
SPBC23E6.08	0.972	0.796	1.114	1.537	0.661	1.122	1.052	1.271	1.576	NA	NA	NA	NA	NA	NA	NA
SPBC947.02	0.972	0.981	1.001	0.993	1.018	1.018	1.07	0.995	1.429	NA	NA	NA	NA	NA	NA	NA
SPCC24B10.02c	0.972	0.917	0.954	1.005	0.912	0.983	0.904	0.805	0.93	NA	NA	NA	NA	NA	NA	NA
SPBC1709.18	0.971	0.961	1.294	1.172	0.97	1.261	1.196	1.001	1.382	NA	NA	NA	NA	NA	NA	1
SPAC1805.10	0.971	0.971	1.087	1.047	0.951	1.075	1.108	0.985	0.989	NA	NA	NA	NA	NA	NA	NA
SPAC683.03	0.971	1.008	0.771	0.827	0.947	0.822	0.866	1.012	1.019	NA	NA	NA	NA	NA	NA	NA
SPAC926.05c	0.971	1.073	1.227	1.122	1.19	1.091	0.985	0.793	0.782	NA	NA	NA	NA	NA	NA	NA
SPAC959.08	0.971	0.943	1.025	1.071	0.994	1.129	0.994	0.991	1.041	NA	NA	NA	NA	NA	NA	NA
SPAP27G11.15	0.971	0.985	1.042	0.892	0.968	0.897	1.012	0.97	0.886	NA	NA	NA	NA	NA	NA	NA
SPBC19G7.03c	0.971	0.997	1.044	0.964	0.988	1.004	1.06	0.92	0.895	NA	NA	NA	NA	NA	NA	NA
SPBC646.08c	0.971	1.03	1.195	1.069	0.998	1.258	1.192	1.027	1.017	NA	NA	NA	NA	NA	NA	NA
SPCC1919.12c	0.971	1.015	1.09	0.963	0.993	1.036	1.032	0.998	0.916	NA	NA	NA	NA	NA	NA	NA
SPAC1B1.02c	0.97	0.997	0.967	0.901	0.925	0.978	0.978	1.033	1.004	NA	NA	NA	NA	NA	NA	NA
SPAC22H10.09	0.97	0.952	1.053	0.909	0.882	0.866	1.091	0.242	0.241	NA	1	NA	1	NA	NA	NA
SPAC29A4.19c	0.97	1.042	0.971	0.958	0.966	0.876	1.035	0.934	0.808	NA	NA	NA	NA	NA	NA	NA
SPAC521.04c	0.97	0.968	1.053	0.975	0.919	0.964	1.002	0.89	1.102	NA	NA	NA	NA	NA	NA	NA
SPAC589.05c	0.97	0.952	0.979	0.98	0.956	0.974	0.949	0.797	0.752	NA	NA	NA	NA	NA	NA	NA
SPAC630.04c	0.97	0.889	1.06	1.025	0.905	0.959	0.977	0.728	0.604	NA	1	NA	1	NA	NA	NA
SPCC1919.13c	0.97	0.997	1.019	0.953	0.999	0.984	1.041	0.981	1.032	NA	NA	NA	NA	NA	NA	NA
SPAC20G4.01	0.969	0.953	0.945	1.163	1.025	1.07	0.979	0.933	1.363	NA	NA	NA	NA	NA	NA	NA
SPAC212.04c	0.969	1.063	1.094	1.137	1.142	1.236	0.988	1.127	1.135	NA	NA	NA	NA	NA	NA	NA
SPAC22E12.06c	0.969	0.937	1.134	1.101	0.943	1.082	1.043	1.033	1.061	NA	NA	NA	NA	NA	NA	NA
SPAC25B8.17	0.969	0.974	1.083	0.98	0.95	0.917	1.11	1.058	0.847	NA	NA	NA	NA	NA	NA	NA
SPAC5H10.13c	0.969	0.985	0.82	0.883	1.012	0.939	0.978	0.975	0.993	NA	NA	NA	NA	NA	NA	NA
SPAC688.06c	0.969	0.972	1.045	1.05	0.975	1.081	1.064	0.847	0.994	NA	NA	NA	NA	NA	NA	NA
SPBC19C7.01	0.969	1.002	1.227	0.98	0.915	1.079	1.012	1.073	1.427	NA	NA	NA	NA	NA	NA	NA
SPBC32H8.01c	0.969	1	0.957	1.008	1.055	0.987	0.984	1.038	1.011	NA	NA	NA	NA	NA	NA	NA
SPBC651.06	0.969	1.058	0.703	0.7	0.909	0.623	0.853	0.935	0.706	NA	1	NA	1	NA	NA	NA
SPCC965.07c	0.969	0.949	0.979	1.07	0.978	1.047	0.992	0.991	1.051	NA	NA	NA	NA	NA	NA	NA
SPAC12G12.11c	0.968	1.046	0.881	0.859	0.948	0.848	0.985	0.93	0.782	NA	NA	NA	NA	NA	NA	NA
SPAC17C9.09c	0.968	1.044	0.897	0.856	1.029	0.903	0.96	1.032	0.943	NA	NA	NA	NA	NA	NA	NA
SPAC19D5.01	0.968	1.016	0.923	0.882	0.996	0.894	0.979	0.936	0.804	NA	NA	NA	NA	NA	NA	NA
SPAC664.12c	0.968	0.924	1.196	1.102	0.952	1.046	1.025	0.985	0.988	NA	NA	NA	NA	NA	NA	NA
SPAP32A8.02	0.968	0.997	0.947	0.98	0.979	0.989	0.832	1.035	0.963	NA	NA	NA	NA	NA	NA	NA
SPBC1711.05	0.968	0.945	1.009	1.151	0.919	1.231	1.065	0.926	0.992	NA	NA	NA	NA	NA	NA	NA
SPBC23G7.06c	0.968	0.978	1.128	1.027	0.957	1.154	1.134	0.905	0.923	NA	NA	NA	NA	NA	NA	NA
SPAC17A5.10	0.967	1.011	1.035	1.119	1.057	1.115	0.994	1.087	1.002	NA	NA	NA	NA	NA	NA	NA
SPAC22A12.11	0.967	0.9	0.721	0.661	0.959	0.636	0.795	0.926	0.889	NA	NA	NA	NA	NA	NA	NA
SPAC22H10.11c	0.967	0.946	1.163	0.969	0.897	1.2	1.052	1.755	2.092	NA	NA	NA	NA	NA	NA	NA
SPAC6F6.11c	0.967	1.053	0.635	0.731	0.909	0.583	0.629	0.925	0.869	NA	NA	NA	NA	NA	NA	NA
SPBC1105.02c	0.967	0.989	1.039	0.996	0.904	0.935	1.055	0.996	0.932	NA	NA	NA	NA	NA	NA	NA
SPBC12C2.04	0.967	0.979	0.904	0.881	0.926	0.823	0.875	0.938	0.877	NA	NA	NA	NA	NA	NA	NA
SPBC1347.11	0.967	1.029	0.949	1.031	1.085	0.818	0.895	0.963	1.06	NA	NA	NA	NA	NA	NA	NA
SPBC146.04	0.967	1.144	0.987	1.11	1.151	1.022	1.111	1.034	1.067	NA	NA	NA	NA	NA	NA	NA
SPBC27B12.08	0.967	0.997	1.032	0.919	0.905	0.909	1.064	0.194	0.188	NA	1	NA	1	NA	NA	NA
SPBC2F12.03c	0.967	0.984	0.843	0.967	0.998	0.948	0.828	0.986	0.881	NA	NA	NA	NA	NA	NA	NA
SPBC409.20c	0.967	0.978	0.985	1.082	1.098	1.184	0.91	0.914	1.073	NA	NA	NA	NA	NA	NA	NA
SPBC713.07c	0.967	0.961	1.115	1.026	1.004	1.035	1.138	0.941	1.015	NA	NA	NA	NA	NA	NA	NA
SPCC330.11	0.967	0.989	0.944	0.928	0.963	0.95	0.988	0.97	0.858	NA	NA	NA	NA	NA	NA	NA
SPCC548.04	0.967	0.951	0.939	1.129	0.962	1.178	0.881	0.663	0.761	NA	NA	NA	NA	NA	NA	NA
SPAC11H11.02c	0.966	0.962	1.087	1.109	0.984	1.209	0.967	0.998	1.048	NA	NA	NA	NA	NA	NA	NA
SPAC19G12.16c	0.966	0.938	0.979	0.961	0.983	0.92	1.01	1.012	0.692	NA	NA	NA	NA	NA	NA	NA
SPAC4G9.13c	0.966	0.925	0.937	1.037	0.929	1.045	0.951	1.04	0.956	NA	NA	NA	NA	NA	NA	NA
SPAPB8E5.10	0.966	1.029	1.098	0.987	0.946	0.823	1.071	0.957	0.867	NA	NA	NA	NA	NA	NA	NA
SPBC23E6.05	0.966	1.016	1.121	1.17	1.085	1.171	0.963	0.987	1.133	NA	NA	NA	NA	NA	NA	NA
SPBC30D10.13c	0.966	1.057	0.929	1.05	1.057	0.859	1.006	0.967	0.902	NA	NA	NA	NA	NA	NA	NA
SPBC31F10.17c	0.966	0.987	1.025	0.917	0.901	0.879	1.084	0.929	0.819	NA	NA	NA	NA	NA	NA	NA
SPBC409.03	0.966	0.973	1.031	1.282	1.025	1.374	0.995	1.029	1.434	NA	NA	NA	NA	NA	NA	NA
SPBC25B2.01	0.965	0.941	0.979	1.032	0.976	0.94	1.011	0.942	0.935	NA	NA	NA	NA	NA	NA	1
SPAC13F5.05	0.965	1.011	0.914	0.981	1.039	0.971	0.946	0.901	1.057	NA	NA	NA	NA	NA	NA	NA
SPAC1639.02c	0.965	0.985	1.022	1.053	0.974	1.018	1.003	0.905	0.836	NA	NA	NA	NA	NA	NA	NA
SPAC17H9.11	0.965	1.008	1.018	0.897	0.998	1.061	1.075	0.989	0.913	NA	NA	NA	NA	NA	NA	NA
SPAC20G8.08c	0.965	0.974	1.103	1.082	0.952	0.992	1	0.953	0.959	NA	NA	NA	NA	NA	NA	NA
SPAC343.06c	0.965	1.001	1.071	0.951	0.955	0.931	1.056	0.929	0.907	NA	NA	NA	NA	NA	NA	NA
SPACUNK4.11c	0.965	0.963	0.964	0.794	0.964	1.086	0.98	0.985	0.886	NA	NA	NA	NA	NA	NA	NA
SPACUNK4.19	0.965	1.006	0.982	0.867	0.889	0.872	0.998	1.002	0.846	NA	NA	NA	NA	NA	NA	NA
SPBC365.16	0.965	0.957	0.938	0.962	0.95	0.827	0.891	0.58	1.112	NA	NA	NA	NA	NA	NA	NA
SPAC25B8.05	0.964	0.993	1.083	0.976	0.982	0.952	1.02	0.612	0.516	NA	1	NA	1	NA	NA	1
SPBC16E9.12c	0.964	0.988	1.109	1.054	0.99	1.033	0.987	1.1	1.291	NA	NA	NA	NA	NA	NA	1
SPAC17G6.13	0.964	0.954	0.975	0.933	0.92	0.911	0.986	1.001	0.87	NA	NA	NA	NA	NA	NA	NA
SPAC18G6.12c	0.964	0.94	0.978	0.945	0.988	0.928	0.92	0.981	1.149	NA	NA	NA	NA	NA	NA	NA
SPAC23H3.12c	0.964	0.879	0.859	0.898	0.905	0.874	0.939	0.91	0.927	NA	NA	NA	NA	NA	NA	NA
SPAC25B8.07c	0.964	0.941	0.896	0.926	0.975	0.928	0.918	0.975	1.572	NA	NA	NA	NA	NA	NA	NA
SPAC458.04c	0.964	1.004	1.106	0.962	0.955	0.831	1.144	0.947	0.892	NA	NA	NA	NA	NA	NA	NA
SPAP8A3.12c	0.964	1.07	0.976	1.129	1.159	1.193	0.958	1.058	1.04	NA	NA	NA	NA	NA	NA	NA
SPBC1347.12	0.964	0.978	1.019	0.942	0.952	0.986	1.058	1.417	0.818	NA	NA	NA	NA	NA	NA	NA
SPAC22H12.05c	0.963	1.013	0.965	0.924	0.998	0.922	0.97	0.965	1.112	NA	NA	NA	NA	NA	NA	NA
SPAC3H1.07	0.963	1.019	0.871	0.948	0.863	0.795	0.966	0.856	1.153	NA	NA	NA	NA	NA	NA	NA
SPAC3H1.12c	0.963	1.003	1.234	1.003	0.972	1.044	1.157	0.886	0.986	NA	NA	NA	NA	NA	NA	NA
SPAC4C5.03	0.963	0.918	1.079	1.117	0.9	1.064	0.973	0.803	1.029	NA	NA	NA	NA	NA	NA	NA
SPAC688.10	0.963	0.868	1.005	0.886	0.868	0.891	0.94	0.839	0.886	NA	NA	NA	NA	NA	NA	NA
SPAC823.03	0.963	1.004	1.179	1.189	0.977	0.903	0.986	1.062	1.185	NA	NA	NA	NA	NA	NA	NA
SPAC959.06c	0.963	0.883	1.083	0.967	0.878	1.038	1.098	0.877	0.919	NA	NA	NA	NA	NA	NA	NA
SPACUNK4.13c	0.963	0.924	0.945	0.898	0.917	1.107	0.955	0.856	1.02	NA	NA	NA	NA	NA	NA	NA
SPBC577.12	0.963	1.013	1.113	1.129	0.999	1.076	1.013	0.912	0.656	NA	NA	NA	NA	NA	NA	NA
SPBP23A10.05	0.963	0.974	0.975	0.91	0.792	0.522	0.888	1.188	1.263	NA	NA	NA	NA	NA	NA	NA
SPAC1805.11c	0.962	1.016	0.983	0.898	0.983	0.936	0.995	0.971	0.913	NA	NA	NA	NA	NA	NA	NA
SPAC9G1.04	0.962	0.904	0.785	0.763	0.906	0.662	0.817	0.832	0.7	NA	1	NA	NA	1	NA	NA
SPBC119.05c	0.962	0.971	1	1.006	0.909	0.996	0.977	0.993	1.002	NA	NA	NA	NA	NA	NA	NA
SPBC1604.08c	0.962	0.946	1.008	0.865	0.855	0.806	1.046	0.945	0.845	NA	NA	NA	NA	NA	NA	NA
SPBC609.03	0.962	0.955	0.842	0.878	0.96	0.851	0.925	0.949	0.798	NA	NA	NA	NA	NA	NA	NA
SPCC188.07	0.962	0.826	1.757	0.922	0.706	0.835	1.902	0.939	1.145	NA	NA	NA	NA	NA	NA	NA
SPCC794.03	0.962	0.99	1.129	0.993	0.96	1.173	0.957	0.942	1.419	NA	NA	NA	NA	NA	NA	NA
SPAC1006.03c	0.961	0.986	1.264	1.457	1.076	1.407	1.233	1.302	1.679	NA	NA	NA	NA	NA	NA	NA
SPAC12B10.07	0.961	0.781	1.088	1.047	0.988	1.108	1.024	0.856	1.031	NA	NA	NA	NA	NA	NA	NA
SPAC12B10.15c	0.961	1.077	1.014	1.134	1.089	0.932	1.034	0.996	0.944	NA	NA	NA	NA	NA	NA	NA
SPAC926.02	0.961	0.935	0.912	0.944	0.974	0.95	0.865	0.998	1.021	NA	NA	NA	NA	NA	NA	NA
SPBC1289.14	0.961	0.973	1.035	0.9	0.951	0.94	1.09	0.776	0.592	NA	1	NA	1	NA	NA	NA
SPBC1683.07	0.961	0.998	1.169	0.928	0.919	0.914	1.129	0.948	0.885	NA	NA	NA	NA	NA	NA	NA
SPCC126.07c	0.961	0.966	1.012	0.866	0.925	0.912	1.036	0.912	0.873	NA	NA	NA	NA	NA	NA	NA
SPCC31H12.05c	0.961	0.936	0.979	1.032	0.894	1.127	0.91	0.64	0.733	NA	1	NA	1	NA	NA	NA
SPBC106.12c	0.96	0.956	1.007	0.972	0.962	0.97	0.935	0.974	0.887	NA	NA	NA	NA	NA	NA	1
SPCC1442.16c	0.96	0.928	1.075	1.001	0.98	0.999	1.006	0.957	0.948	NA	NA	NA	NA	NA	NA	1
SPAC140.04	0.96	1.009	1.003	0.928	0.977	0.957	0.983	1.25	0.738	NA	NA	NA	NA	NA	NA	NA
SPAC24C9.15c	0.96	0.984	0.992	0.93	0.959	0.932	1.089	0.992	0.859	NA	NA	NA	NA	NA	NA	NA
SPAC3G6.03c	0.96	0.962	0.953	0.918	0.926	0.82	1.05	1.037	0.913	NA	NA	NA	NA	NA	NA	NA
SPBC16E9.07	0.96	1.026	1.148	1.104	1.013	1.118	1.131	0.994	1.057	NA	NA	NA	NA	NA	NA	NA
SPCC1450.06c	0.96	0.984	0.946	1.078	1.125	1.096	0.868	1.019	0.985	NA	NA	NA	NA	NA	NA	NA
SPCC1840.02c	0.96	0.966	1.035	0.888	0.981	0.917	1.022	0.708	0.7	NA	1	NA	1	NA	NA	NA
SPAC1399.02	0.959	1.002	1.174	1.16	1.008	1.12	0.998	1.011	1.079	NA	NA	NA	NA	NA	NA	NA
SPAC13G6.15c	0.959	0.885	1.003	0.987	0.97	0.996	1.018	0.945	0.904	NA	NA	NA	NA	NA	NA	NA
SPAC17A5.11	0.959	0.986	1.021	0.911	0.939	0.965	1.048	0.993	0.936	NA	NA	NA	NA	NA	NA	NA
SPAC19A8.14	0.959	1	1.03	0.944	0.932	0.954	1.089	0.957	0.878	NA	NA	NA	NA	NA	NA	NA
SPBC146.06c	0.959	1.117	1.051	1.07	1.12	1.004	1.12	0.999	0.777	NA	NA	NA	NA	NA	NA	NA
SPBC1683.10c	0.959	0.957	1.047	0.947	0.913	0.907	1.078	0.865	0.896	NA	NA	NA	NA	NA	NA	NA
SPBC16G5.11c	0.959	0.976	1.067	0.974	0.95	0.899	1.119	1.086	1.07	NA	NA	NA	NA	NA	NA	NA
SPBC17D1.07c	0.959	0.961	1.001	1.007	0.924	0.93	0.981	0.956	0.891	NA	NA	NA	NA	NA	NA	NA
SPBC3E7.15c	0.959	0.9	1.043	1.016	0.902	0.988	0.928	2.4	3.049	NA	NA	NA	NA	NA	NA	NA
SPBC9B6.03	0.959	0.934	1.113	1.27	0.894	0.869	0.923	1.073	1.25	NA	NA	NA	NA	NA	NA	NA
SPAC15A10.08	0.958	1.041	1.051	0.9	0.938	0.961	1.083	0.927	1.067	NA	NA	NA	NA	NA	NA	NA
SPAC18G6.10	0.958	0.943	0.971	1.09	0.939	1.199	1.042	1.364	1.113	NA	NA	NA	NA	NA	NA	NA
SPAC222.05c	0.958	0.973	0.979	0.755	0.973	0.862	1.138	0.188	0.27	NA	1	NA	1	NA	NA	NA
SPAC869.07c	0.958	0.95	0.919	1.059	0.884	1.012	0.934	0.864	1.008	NA	NA	NA	NA	NA	NA	NA
SPCC1322.14c	0.958	0.982	0.901	0.954	0.964	0.949	0.951	0.841	0.987	NA	NA	NA	NA	NA	NA	NA
SPAC13A11.06	0.957	0.967	1.086	0.969	0.87	0.886	1.064	1.154	1.16	NA	NA	NA	NA	NA	NA	NA
SPAC15A10.16	0.957	0.843	0.82	1.011	1.029	1.002	0.874	0.988	0.91	NA	NA	NA	NA	NA	NA	NA
SPAC23G3.07c	0.957	0.846	0.856	1.057	0.87	0.957	0.799	0.83	0.955	NA	NA	NA	NA	NA	NA	NA
SPAC29B12.02c	0.957	0.963	1.161	1.03	0.95	1.053	1.088	1.004	0.957	NA	NA	NA	NA	NA	NA	NA
SPAC664.03	0.957	0.91	1.087	1.009	0.653	0.386	0.754	1.099	1.636	NA	NA	NA	NA	NA	NA	NA
SPAP14E8.04	0.956	0.891	0.884	0.922	0.936	1.12	0.912	0.838	1.039	NA	NA	NA	NA	NA	NA	NA
SPBC211.06	0.956	0.981	1.003	0.941	0.968	0.932	1.027	1.114	1.177	NA	NA	NA	NA	NA	NA	NA
SPBC409.07c	0.956	0.909	0.828	0.811	0.906	0.926	1.009	1.101	1.002	NA	NA	NA	NA	NA	NA	NA
SPBC651.03c	0.956	1.087	1.016	1.067	1.103	1.081	0.991	1.087	1.161	NA	NA	NA	NA	NA	NA	NA
SPBC887.11	0.955	0.99	1.014	0.947	0.918	0.92	1.016	0.746	1.2	NA	NA	NA	NA	NA	NA	1
SPAC16C9.01c	0.955	0.955	0.974	0.937	0.974	0.974	1.028	0.981	0.833	NA	NA	NA	NA	NA	NA	NA
SPAC57A10.03	0.955	0.922	0.981	0.945	0.925	0.961	0.977	0.949	0.956	NA	NA	NA	NA	NA	NA	NA
SPAPB18E9.04c	0.955	0.976	0.985	0.946	0.964	0.928	1.018	1.029	1.031	NA	NA	NA	NA	NA	NA	NA
SPBC215.11c	0.955	0.924	1.058	0.938	0.953	0.977	1.042	0.977	0.951	NA	NA	NA	NA	NA	NA	NA
SPCC1322.08	0.955	0.879	0.898	1.007	0.917	0.982	0.883	0.866	1.096	NA	NA	NA	NA	NA	NA	NA
SPAC1527.03	0.954	1.037	0.893	1.006	1.12	1.022	0.969	0.999	0.76	NA	NA	NA	NA	NA	NA	1
SPBC17G9.10	0.954	0.903	1.156	1.043	0.995	1.2	1.022	1.216	1.402	NA	NA	NA	NA	NA	NA	1
SPAC1556.06.1	0.954	0.92	0.953	0.965	1.003	0.946	0.955	0.917	0.97	NA	NA	NA	NA	NA	NA	NA
SPAC1834.04	0.954	0.938	0.959	1.022	1.006	1.112	0.881	0.893	0.917	NA	NA	NA	NA	NA	NA	NA
SPAC3H1.13	0.954	0.98	0.818	0.819	0.916	0.78	0.75	0.917	0.876	NA	NA	NA	NA	NA	NA	NA
SPAC869.08	0.954	1	0.909	1.032	1.123	1.093	0.906	0.966	1.127	NA	NA	NA	NA	NA	NA	NA
SPAPB17E12.08	0.954	0.969	1.032	0.974	0.977	0.949	1.041	1.015	0.847	NA	NA	NA	NA	NA	NA	NA
SPBC119.03	0.954	1.006	0.988	1.015	0.942	0.993	0.966	1	0.756	NA	NA	NA	NA	NA	NA	NA
SPBC3E7.12c	0.954	0.97	1.023	0.961	0.976	0.97	1.006	1.096	1.034	NA	NA	NA	NA	NA	NA	NA
SPBC428.11	0.954	1.031	0.987	1.059	1.039	1.136	0.977	0.987	0.948	NA	NA	NA	NA	NA	NA	NA
SPCC622.14	0.954	1	1.036	0.994	0.973	1.042	1.023	0.921	1.333	NA	NA	NA	NA	NA	NA	NA
SPAC2C4.07c	0.953	0.966	1.017	0.997	0.93	1.047	0.97	0.964	0.987	NA	NA	NA	NA	NA	NA	1
SPAC1687.08	0.953	0.953	1.027	0.954	0.964	1.013	1.045	0.941	0.947	NA	NA	NA	NA	NA	NA	NA
SPAC17G6.08	0.953	0.99	1.158	1.069	1.031	1.284	1.061	0.985	1.238	NA	NA	NA	NA	NA	NA	NA
SPAC1B3.01c	0.953	0.952	0.91	0.892	0.921	0.927	1.031	0.818	0.559	NA	1	NA	1	NA	NA	NA
SPAC3G6.09c	0.953	0.959	0.874	0.93	0.951	0.899	0.836	1.012	0.993	NA	NA	NA	NA	NA	NA	NA
SPAC4A8.07c	0.953	0.946	1.025	0.885	0.942	0.938	1.006	0.949	0.78	NA	NA	NA	NA	NA	NA	NA
SPAP8A3.04c	0.953	0.963	0.999	0.982	0.917	0.949	0.96	0.969	0.439	NA	1	NA	1	NA	NA	NA
SPBC577.06c	0.953	1.03	1.046	1.026	1.015	1.027	1.066	0.932	0.967	NA	NA	NA	NA	NA	NA	NA
SPBC947.15c	0.953	0.868	0.779	0.934	0.876	0.911	0.844	0.347	0.322	NA	1	NA	1	NA	NA	NA
SPCC1795.09	0.953	0.919	0.91	0.938	0.933	0.824	0.874	0.94	0.923	NA	NA	NA	NA	NA	NA	NA
SPCC417.11c	0.953	0.998	0.973	0.945	0.892	0.813	0.988	0.897	1.054	NA	NA	NA	NA	NA	NA	NA
SPAC1142.01	0.952	1.017	0.943	0.954	0.959	0.894	0.976	0.928	1.073	NA	NA	NA	NA	NA	NA	NA
SPAC1952.12c	0.952	1.064	1.059	1.192	1.048	1.008	0.887	1.048	1.021	NA	NA	NA	NA	NA	NA	NA
SPAC212.08c	0.952	0.939	0.883	0.926	0.93	0.969	0.987	0.987	0.884	NA	NA	NA	NA	NA	NA	NA
SPAC25H1.09	0.952	0.944	0.953	1.017	0.917	0.92	0.913	0.924	0.982	NA	NA	NA	NA	NA	NA	NA
SPBC1347.03	0.952	1.001	1.009	0.954	0.972	1.008	1.032	0.976	0.874	NA	NA	NA	NA	NA	NA	NA
SPBC3D6.05	0.952	0.947	1	0.915	0.961	0.931	0.997	0.989	1.006	NA	NA	NA	NA	NA	NA	NA
SPBC3E7.09	0.952	0.945	1.099	0.968	0.951	0.954	1.029	1.102	0.997	NA	NA	NA	NA	NA	NA	NA
SPBC887.04c	0.952	0.946	0.927	1.121	1.018	1.06	0.91	0.844	0.859	NA	NA	NA	NA	NA	NA	NA
SPAC1783.01	0.951	0.936	1.096	0.955	0.897	0.975	1.058	0.872	0.903	NA	NA	NA	NA	NA	NA	NA
SPAC186.06	0.951	0.973	0.97	0.969	0.996	1.024	1.011	0.943	0.965	NA	NA	NA	NA	NA	NA	NA
SPAC27D7.11c	0.951	1.026	1.022	1	1.042	1.024	1.031	0.991	0.944	NA	NA	NA	NA	NA	NA	NA
SPAC6G10.02c	0.951	0.924	0.996	0.948	0.962	0.908	1.019	1.04	1.176	NA	NA	NA	NA	NA	NA	NA
SPBC119.16c	0.951	0.901	0.947	0.894	0.909	0.875	0.991	0.834	0.894	NA	NA	NA	NA	NA	NA	NA
SPBC1539.06	0.951	0.969	0.847	0.911	0.936	0.92	0.806	1.213	1.34	NA	NA	NA	NA	NA	NA	NA
SPBC1652.01	0.951	0.981	1.116	1.017	0.956	1.005	1.034	0.928	0.96	NA	NA	NA	NA	NA	NA	NA
SPBC1861.07	0.951	0.852	1.182	0.906	0.83	1.085	1.02	0.96	1.334	NA	NA	NA	NA	NA	NA	NA
SPBC8E4.04	0.951	0.993	0.973	1.066	0.944	1.117	0.933	0.798	0.936	NA	NA	NA	NA	NA	NA	NA
SPCC663.11	0.951	0.931	1.14	1.003	0.879	1.011	1.043	1.036	1.184	NA	NA	NA	NA	NA	NA	NA
SPAC1B3.11c	0.95	0.996	1.054	0.996	0.989	1.003	1.092	1.019	1.018	NA	NA	NA	NA	NA	NA	NA
SPAC23D3.10c	0.95	1.01	1.064	1.105	1.038	1.165	1.044	1.017	1.05	NA	NA	NA	NA	NA	NA	NA
SPAC9E9.15	0.95	1.029	1.07	0.953	1.025	0.94	1.115	0.978	0.889	NA	NA	NA	NA	NA	NA	NA
SPBC428.03c	0.95	1.031	0.953	1.042	1.048	1.044	1.013	0.697	0.642	NA	1	NA	1	NA	NA	NA
SPBC4C3.06	0.95	0.989	1.019	1.147	1.01	1.182	1.098	1.057	0.977	NA	NA	NA	NA	NA	NA	NA
SPBC557.04	0.95	1.016	1.144	1.031	0.972	0.866	1.1	0.914	0.964	NA	NA	NA	NA	NA	NA	NA
SPCC126.11c	0.949	0.972	0.904	0.862	0.976	0.839	0.96	1.019	1.06	NA	NA	NA	NA	NA	NA	1
SPAC26F1.14c	0.949	0.981	0.953	0.905	0.962	0.959	0.969	1.014	0.88	NA	NA	NA	NA	NA	NA	NA
SPAC3C7.09	0.949	0.911	0.923	0.947	0.879	0.894	1.047	0.879	0.949	NA	NA	NA	NA	NA	NA	NA
SPAC683.02c	0.949	0.931	1.102	0.92	0.849	0.772	1.089	0.778	1.35	NA	NA	NA	NA	NA	NA	NA
SPBC4F6.16c	0.949	0.975	0.819	0.933	0.931	0.875	0.867	0.838	1.08	NA	NA	NA	NA	NA	NA	NA
SPCC4G3.05c	0.949	0.959	1.089	0.953	0.879	1.068	1.065	0.864	1.059	NA	NA	NA	NA	NA	NA	NA
SPCC663.06c	0.949	0.995	1.151	0.947	0.951	0.835	1.027	1.009	0.895	NA	NA	NA	NA	NA	NA	NA
SPAC13F5.07c	0.948	0.955	1.03	0.947	0.964	0.937	0.983	0.971	0.932	NA	NA	NA	NA	NA	NA	NA
SPAC1B3.17	0.948	0.874	1.02	1.016	0.828	1.035	0.905	0.938	0.917	NA	NA	NA	NA	NA	NA	NA
SPAC22E12.01	0.948	0.968	0.972	0.92	0.955	0.942	0.953	0.946	0.912	NA	NA	NA	NA	NA	NA	NA
SPAC24C9.07c	0.948	0.956	0.988	1.023	0.951	1.017	1.09	1.045	0.966	NA	NA	NA	NA	NA	NA	NA
SPAC922.03	0.948	1.011	1.343	1.166	1.031	1.234	0.995	1.041	1.034	NA	NA	NA	NA	NA	NA	NA
SPBC16G5.05c	0.948	1.008	1.066	1.091	1.052	1.003	1.021	0.888	0.944	NA	NA	NA	NA	NA	NA	NA
SPAC22H10.08	0.947	1.006	0.897	0.991	0.994	0.873	0.96	1.027	0.843	NA	NA	NA	NA	NA	NA	NA
SPAPJ691.02	0.947	0.936	1.025	0.973	1.004	1.077	0.922	0.908	0.597	NA	NA	NA	NA	NA	NA	NA
SPBC1683.02	0.947	0.911	0.911	0.836	0.957	0.824	0.928	0.939	0.893	NA	NA	NA	NA	NA	NA	NA
SPBC1683.08	0.947	0.998	1.119	1.081	1.048	1.088	1.049	1.042	1.006	NA	NA	NA	NA	NA	NA	NA
SPBC23G7.10c	0.947	1.028	0.973	1.028	1.139	1.039	0.965	0.968	0.968	NA	NA	NA	NA	NA	NA	NA
SPBC2D10.19c	0.947	1.015	0.939	0.912	0.966	0.904	0.925	0.942	0.84	NA	NA	NA	NA	NA	NA	NA
SPBC3B8.03	0.947	0.997	1.051	0.933	0.696	0.798	1.015	0.567	0.662	NA	1	NA	1	NA	NA	NA
SPCC18B5.09c	0.947	0.964	0.932	0.919	0.931	0.93	0.983	0.957	0.947	NA	NA	NA	NA	NA	NA	NA
SPCC962.05	0.947	1.065	0.954	1.354	1.055	1.113	1.009	0.865	0.951	NA	NA	NA	NA	NA	NA	NA
SPAC328.04	0.946	0.931	1.005	0.948	0.929	0.989	1.003	0.954	0.868	NA	NA	NA	NA	NA	NA	NA
SPAC3G9.05	0.946	0.999	0.785	0.84	1.036	0.832	0.796	0.996	0.915	NA	NA	NA	NA	NA	NA	NA
SPAC6G10.03c	0.946	1.067	0.964	1.169	1.109	1.214	0.942	1.057	1.074	NA	NA	NA	NA	NA	NA	NA
SPAC8C9.09c	0.946	0.959	0.928	0.966	0.854	0.824	0.919	0.861	0.9	NA	NA	NA	NA	NA	NA	NA
SPBC1347.09	0.946	0.894	0.924	0.919	0.895	0.935	0.961	0.878	0.928	NA	NA	NA	NA	NA	NA	NA
SPBC16E9.15	0.946	0.933	1.096	0.998	0.951	0.999	0.904	0.982	0.865	NA	NA	NA	NA	NA	NA	NA
SPAC1805.15c	0.945	0.977	1.058	1.027	0.94	0.999	1.02	0.938	0.895	NA	NA	NA	NA	NA	NA	NA
SPACUNK4.10	0.945	1.035	0.956	1.072	1.072	1.073	0.959	1.024	0.939	NA	NA	NA	NA	NA	NA	NA
SPBC1709.14	0.945	0.953	1.042	0.957	0.938	0.977	1.028	0.948	1.319	NA	NA	NA	NA	NA	NA	NA
SPBP22H7.08	0.945	0.829	0.929	1.045	0.991	1.077	0.96	1.774	1.687	NA	NA	NA	NA	NA	NA	NA
SPBP35G2.13c	0.945	1.116	1.079	1.277	1.148	1.228	1.001	1.038	1.277	NA	NA	NA	NA	NA	NA	NA
SPAC1071.12c	0.944	0.999	0.964	0.93	0.947	0.931	0.968	0.963	0.983	NA	NA	NA	NA	NA	NA	NA
SPAC17G6.03	0.944	0.917	1.024	0.985	0.898	0.927	0.937	0.926	0.934	NA	NA	NA	NA	NA	NA	NA
SPAC227.14	0.944	0.951	0.982	0.882	0.927	0.967	1.007	0.976	0.945	NA	NA	NA	NA	NA	NA	NA
SPAC31G5.07	0.944	1.047	1.035	0.915	0.956	0.871	1.002	0.946	0.859	NA	NA	NA	NA	NA	NA	NA
SPAC922.05c	0.944	0.928	1.005	0.931	0.944	0.976	1.031	0.763	0.619	NA	1	NA	1	NA	NA	NA
SPBC337.15c	0.944	0.987	1.047	0.971	0.981	0.98	1.037	0.93	0.914	NA	NA	NA	NA	NA	NA	NA
SPBC3E7.05c	0.944	1.043	0.829	0.741	1.051	0.89	0.855	0.735	0.599	NA	1	NA	NA	1	NA	NA
SPCC162.04c	0.944	0.992	1.041	1.018	1.002	1.022	1	0.929	0.861	NA	NA	NA	NA	NA	NA	NA
SPCC191.11	0.944	0.988	1.048	1.026	1.029	0.897	0.937	1.006	0.889	NA	NA	NA	NA	NA	NA	NA
SPCC777.12c	0.944	0.953	1.053	0.92	0.95	1.002	1.058	0.942	0.854	NA	NA	NA	NA	NA	NA	NA
SPAC20G4.08	0.943	0.919	1.103	0.993	0.881	1.063	1.098	0.969	1.104	NA	NA	NA	NA	NA	NA	NA
SPAC23H3.11c	0.943	0.955	0.937	0.914	0.997	0.908	0.939	0.946	0.806	NA	NA	NA	NA	NA	NA	NA
SPAC32A11.02c	0.943	0.968	0.938	0.988	0.974	1.008	1.052	0.996	0.875	NA	NA	NA	NA	NA	NA	NA
SPAC4G9.12	0.943	0.981	1.052	0.95	0.955	0.928	1.049	1.016	1.046	NA	NA	NA	NA	NA	NA	NA
SPAC56E4.03	0.943	1.084	1.137	1.203	1.191	1.303	1.147	1.075	1.093	NA	NA	NA	NA	NA	NA	NA
SPAPB2B4.06	0.943	0.994	1.041	0.929	0.937	1.007	0.998	0.98	0.957	NA	NA	NA	NA	NA	NA	NA
SPBC20F10.10	0.943	0.825	0.727	0.745	0.774	0.648	0.796	1.118	0.878	NA	NA	NA	NA	NA	NA	NA
SPBC23E6.02	0.943	1.055	0.977	1.091	1.099	1.089	1.047	1.079	0.756	NA	NA	NA	NA	NA	NA	NA
SPBC337.07c	0.943	1.056	1.107	1.316	1.044	1.184	1.069	1.083	1.234	NA	NA	NA	NA	NA	NA	NA
SPBC56F2.03	0.943	0.981	0.989	0.943	0.957	0.991	1.041	0.643	0.551	NA	1	NA	1	NA	NA	NA
SPAC21E11.04	0.942	0.848	1.005	1.077	0.809	1.081	0.958	0.847	1.186	NA	NA	NA	NA	NA	NA	NA
SPAC27D7.04	0.942	0.948	0.979	0.898	0.997	1.005	0.967	0.753	0.663	NA	1	NA	1	NA	NA	NA
SPAC5H10.11	0.942	0.973	1.265	1.057	0.948	1.216	1.094	0.897	1.357	NA	NA	NA	NA	NA	NA	NA
SPAC6G10.06	0.942	0.904	1.186	0.933	0.909	1.024	1.076	0.958	0.977	NA	NA	NA	NA	NA	NA	NA
SPAPJ691.03	0.942	1.053	0.772	0.79	0.98	0.838	0.714	0.8	0.67	NA	1	NA	1	NA	NA	NA
SPBC649.02	0.942	0.988	1.005	1.257	1.049	1.189	1.01	1.023	1.49	NA	NA	NA	NA	NA	NA	NA
SPBP23A10.14c	0.942	0.986	1.098	1.021	0.951	1.036	1.088	1.069	1.09	NA	NA	NA	NA	NA	NA	NA
SPAC13A11.01c	0.941	0.87	1.326	0.903	0.855	0.935	1.263	0.91	0.905	NA	NA	NA	NA	NA	NA	NA
SPAC29B12.05c	0.941	1.008	0.9	0.924	0.971	0.927	0.943	1.253	0.877	NA	NA	NA	NA	NA	NA	NA
SPAC57A10.06	0.941	1.006	0.982	0.887	0.981	0.962	1.004	0.93	0.863	NA	NA	NA	NA	NA	NA	NA
SPBC18H10.10c	0.941	0.996	1.082	1.097	0.976	0.952	1.127	0.96	1.014	NA	NA	NA	NA	NA	NA	NA
SPBP35G2.03c	0.941	0.977	0.797	0.832	0.948	0.669	0.963	1.119	0.761	NA	NA	NA	NA	NA	NA	NA
SPBP8B7.13	0.941	1.003	0.776	0.875	1.045	0.788	0.903	0.851	1	NA	NA	NA	NA	NA	NA	NA
SPCC285.16c	0.941	0.902	1.089	1.035	0.919	1.074	0.831	1.12	1.19	NA	NA	NA	NA	NA	NA	NA
SPAC16E8.06c	0.94	0.856	1.103	1.066	0.922	1.189	0.986	0.952	1.015	NA	NA	NA	NA	NA	NA	1
SPAC26F1.08c	0.94	0.91	0.961	0.937	0.96	0.957	0.931	1.043	1.011	NA	NA	NA	NA	NA	NA	NA
SPAC30C2.07	0.94	0.941	1.113	0.954	0.922	0.984	1.091	0.964	0.738	NA	NA	NA	NA	NA	NA	NA
SPAC5H10.04	0.94	0.992	0.971	0.999	1.013	1.074	0.965	0.69	0.62	NA	1	NA	NA	1	NA	NA
SPAPB1E7.08c	0.94	1.013	1.049	1.063	1.066	1.096	1.062	0.985	0.927	NA	NA	NA	NA	NA	NA	NA
SPBC1711.14	0.94	0.974	1.072	1.172	1.069	1.113	1.065	0.986	1.097	NA	NA	NA	NA	NA	NA	NA
SPBC19G7.09	0.94	0.879	0.915	0.97	0.813	0.905	0.927	0.768	0.876	NA	NA	NA	NA	NA	NA	NA
SPBC337.11	0.94	0.964	1.153	1.041	0.973	1.09	1.179	0.938	0.935	NA	NA	NA	NA	NA	NA	NA
SPBC4F6.06	0.94	0.956	0.951	0.952	0.997	0.847	0.951	0.767	1.17	NA	NA	NA	NA	NA	NA	NA
SPBC8D2.19	0.94	0.976	0.925	0.98	1.035	1.08	0.928	0.976	1.012	NA	NA	NA	NA	NA	NA	NA
SPAC18B11.02c	0.939	0.926	0.807	0.888	0.783	0.779	0.812	0.74	0.819	NA	1	NA	1	NA	NA	1
SPAC13G6.07c	0.939	0.882	1.007	0.984	0.981	1.003	0.917	0.852	0.985	NA	NA	NA	NA	NA	NA	NA
SPBC530.14c	0.939	0.942	1.308	1.226	0.902	1.264	1.27	1.085	1.656	NA	NA	NA	NA	NA	NA	NA
SPBC660.07	0.939	0.841	0.82	0.809	0.876	0.832	0.906	0.988	0.943	NA	NA	NA	NA	NA	NA	NA
SPCC1322.03	0.939	1.018	0.982	1.185	1.14	1.191	0.972	1.057	1.011	NA	NA	NA	NA	NA	NA	NA
SPCC4B3.13	0.939	0.865	0.819	0.967	0.815	0.912	0.896	0.778	0.903	NA	NA	NA	NA	NA	NA	NA
SPCC4G3.19	0.939	0.971	1.042	0.942	0.898	0.981	1.094	0.889	0.922	NA	NA	NA	NA	NA	NA	NA
SPAC1952.15c	0.938	0.964	1.043	0.931	0.931	1.015	1.073	0.879	0.908	NA	NA	NA	NA	NA	NA	NA
SPAC22A12.16	0.938	0.897	0.947	1.032	0.893	1.036	0.872	0.91	1.066	NA	NA	NA	NA	NA	NA	NA
SPAC22E12.04	0.938	0.976	1.011	1.021	0.961	0.968	0.99	0.96	0.601	NA	NA	NA	NA	NA	NA	NA
SPAC25H1.04	0.938	0.925	0.965	1.01	0.957	0.985	1.014	0.922	1.005	NA	NA	NA	NA	NA	NA	NA
SPAC27F1.10	0.938	0.917	0.956	0.816	0.883	0.862	1	0.858	0.942	NA	NA	NA	NA	NA	NA	NA
SPBC1289.13c	0.938	0.961	1.055	1.061	0.916	1.027	1.068	1.009	0.965	NA	NA	NA	NA	NA	NA	NA
SPBC428.05c	0.938	0.946	1.086	0.904	0.92	1.013	1.056	0.912	0.826	NA	NA	NA	NA	NA	NA	NA
SPBC646.13	0.938	0.974	0.73	0.794	0.968	0.548	0.776	1.06	0.841	NA	NA	NA	NA	NA	NA	NA
SPBC651.04	0.938	0.909	0.734	0.78	0.99	0.822	0.909	0.929	0.79	NA	NA	NA	NA	NA	NA	NA
SPBC685.02	0.938	0.941	0.981	0.958	0.94	0.914	0.936	0.958	0.941	NA	NA	NA	NA	NA	NA	NA
SPCC777.04	0.938	0.935	0.982	0.895	0.972	0.937	1.059	0.899	0.971	NA	NA	NA	NA	NA	NA	NA
SPAC18B11.03c	0.937	1.034	0.985	1.016	1.229	1.141	0.987	1.063	1.104	NA	NA	NA	NA	NA	NA	NA
SPAC823.09c	0.937	0.994	1.082	1.034	0.947	1.043	0.991	0.977	0.916	NA	NA	NA	NA	NA	NA	NA
SPAC977.16c	0.937	0.969	1.107	1.006	1.018	1.022	1.002	0.911	1.015	NA	NA	NA	NA	NA	NA	NA
SPAP11E10.01	0.937	0.995	1.035	0.934	0.976	0.946	0.982	0.991	0.97	NA	NA	NA	NA	NA	NA	NA
SPBC1271.07c	0.937	0.921	0.973	0.924	0.989	0.966	0.961	0.954	0.759	NA	NA	NA	NA	NA	NA	NA
SPCC1235.13	0.937	0.907	0.833	1.084	0.888	1.003	0.885	0.786	1.049	NA	NA	NA	NA	NA	NA	NA
SPCC417.06c	0.937	0.933	0.915	1.007	0.924	1.044	1.015	1.003	1.072	NA	NA	NA	NA	NA	NA	NA
SPCPB1C11.01	0.937	1.011	0.911	0.98	1.142	1.04	0.943	1.009	1.103	NA	NA	NA	NA	NA	NA	NA
SPAC11D3.01c	0.936	1.014	0.881	0.915	0.916	0.885	0.956	0.892	0.857	NA	NA	NA	NA	NA	NA	NA
SPAC13C5.02	0.936	0.88	1.032	0.956	0.941	0.949	1.027	1.01	1.021	NA	NA	NA	NA	NA	NA	NA
SPAC17C9.11c	0.936	0.887	1.06	0.892	0.922	0.899	1.118	0.856	0.971	NA	NA	NA	NA	NA	NA	NA
SPBC13G1.12	0.936	0.916	1.056	1.076	0.945	0.96	0.923	1.081	1.611	NA	NA	NA	NA	NA	NA	NA
SPBC16G5.09	0.936	1.017	0.984	1.153	1.005	1.041	0.989	0.929	1.077	NA	NA	NA	NA	NA	NA	NA
SPCC1739.15	0.936	1.066	0.997	0.938	0.988	0.971	1.066	0.924	0.869	NA	NA	NA	NA	NA	NA	NA
SPCC4G3.11	0.936	1.003	0.957	1.083	1.045	1.055	0.906	1.061	1.049	NA	NA	NA	NA	NA	NA	NA
SPCC576.01c	0.936	1.004	0.956	0.895	0.97	0.92	0.917	1.006	0.802	NA	NA	NA	NA	NA	NA	NA
SPAC20G8.02	0.935	1.04	1.154	1.043	1.03	1.121	1.038	0.911	1.054	NA	NA	NA	NA	NA	NA	NA
SPAC25G10.02	0.935	0.975	0.826	1.052	0.855	0.924	0.893	0.8	0.877	NA	NA	NA	NA	NA	NA	NA
SPCC1235.12c	0.935	1.036	0.983	1.07	1.073	0.975	0.957	0.972	0.962	NA	NA	NA	NA	NA	NA	NA
SPCC338.11c	0.935	0.982	0.96	0.927	0.901	0.885	1.055	0.986	0.917	NA	NA	NA	NA	NA	NA	NA
SPCC5E4.05c	0.935	0.963	1.079	1.037	0.941	1.169	1.083	0.903	1.066	NA	NA	NA	NA	NA	NA	NA
SPAC23C4.17	0.934	0.799	0.888	0.979	0.935	1.013	0.911	0.806	0.996	NA	NA	NA	NA	NA	NA	1
SPBC106.08c	0.934	0.953	0.974	0.909	0.966	0.941	1.018	0.983	0.896	NA	NA	NA	NA	NA	NA	NA
SPBC11G11.01	0.934	1.014	0.806	0.967	0.958	0.913	0.826	1.077	0.882	NA	NA	NA	NA	NA	NA	NA
SPBC18H10.13	0.934	0.917	0.967	0.902	0.918	0.964	1.022	1.072	0.995	NA	NA	NA	NA	NA	NA	NA
SPBC28E12.06c	0.934	0.916	0.954	1.109	0.976	1.247	0.983	1.014	1.158	NA	NA	NA	NA	NA	NA	NA
SPBP8B7.21	0.934	1.062	1.2	0.95	0.966	1.118	1.081	0.97	1.517	NA	NA	NA	NA	NA	NA	NA
SPBC11C11.08	0.933	1.001	0.868	0.943	1.03	0.901	1.049	0.796	0.961	NA	NA	NA	NA	NA	NA	1
SPAC5H10.05c	0.933	0.954	0.962	1.067	0.974	0.944	0.972	1.063	1.02	NA	NA	NA	NA	NA	NA	NA
SPAC890.03	0.933	0.883	0.796	0.666	0.934	0.932	0.905	0.87	0.824	NA	NA	NA	NA	NA	NA	NA
SPBC1773.04	0.933	0.904	0.978	0.922	0.887	0.894	0.949	0.903	0.869	NA	NA	NA	NA	NA	NA	NA
SPBC1773.17c	0.933	0.863	0.823	0.886	0.821	0.872	0.846	0.782	0.942	NA	NA	NA	NA	NA	NA	NA
SPBC428.07	0.933	0.945	0.941	0.961	0.937	0.942	0.942	1.001	0.96	NA	NA	NA	NA	NA	NA	NA
SPCC1840.09	0.933	0.866	0.786	0.956	0.883	0.894	0.823	0.592	0.377	NA	1	NA	1	NA	NA	NA
SPCP1E11.04c	0.933	0.978	1.015	0.974	0.96	1.007	1.036	0.921	0.903	NA	NA	NA	NA	NA	NA	NA
SPAC11D3.18c	0.932	0.949	0.973	0.992	0.948	0.976	0.999	0.984	0.931	NA	NA	NA	NA	NA	NA	NA
SPAC3H1.14	0.932	0.958	0.976	0.952	0.93	0.901	1.015	0.996	0.99	NA	NA	NA	NA	NA	NA	NA
SPAC688.04c	0.932	0.946	0.986	0.917	0.868	0.896	0.996	1.018	0.919	NA	NA	NA	NA	NA	NA	NA
SPCC24B10.14c	0.932	0.951	1.093	1.001	0.881	0.999	1.055	1.043	0.981	NA	NA	NA	NA	NA	NA	NA
SPCC330.02	0.932	0.978	1.049	0.895	0.882	0.944	1.02	0.988	0.945	NA	NA	NA	NA	NA	NA	NA
SPAC15A10.09c	0.931	0.854	0.973	0.964	0.854	1.022	0.999	0.81	0.995	NA	NA	NA	NA	NA	NA	NA
SPAC323.04	0.931	1.006	0.962	1.232	1.086	1.043	0.962	0.858	0.513	NA	1	NA	1	NA	NA	NA
SPBC1105.01	0.931	0.99	1.156	1.149	0.992	1.098	1.111	0.969	1.032	NA	NA	NA	NA	NA	NA	NA
SPBC1348.14c	0.931	0.985	0.957	1.067	0.992	1.041	0.99	0.966	1.086	NA	NA	NA	NA	NA	NA	NA
SPBC21C3.14c	0.931	0.855	1.03	0.973	0.918	1.039	0.924	0.853	0.922	NA	NA	NA	NA	NA	NA	NA
SPBC8D2.16c	0.931	1.063	1.047	0.929	0.937	0.918	1.063	0.971	1.089	NA	NA	NA	NA	NA	NA	NA
SPCC736.13	0.931	0.902	1.041	0.966	0.884	0.889	1.084	0.905	0.906	NA	NA	NA	NA	NA	NA	NA
SPAC167.04	0.93	0.833	0.929	1.014	0.77	0.752	0.976	0.789	0.858	NA	NA	NA	NA	NA	NA	NA
SPAC23H4.01c	0.93	0.96	1.124	0.892	0.848	0.81	1.083	0.849	0.908	NA	NA	NA	NA	NA	NA	NA
SPAC27E2.03c	0.93	1.16	0.995	0.964	1.003	0.933	1.006	0.925	1.053	NA	NA	NA	NA	NA	NA	NA
SPAC922.07c	0.93	0.971	1.013	0.94	0.924	0.956	1.06	1.062	1.285	NA	NA	NA	NA	NA	NA	NA
SPBC29A3.10c	0.93	0.96	0.955	0.99	0.977	0.964	0.967	0.888	1.04	NA	NA	NA	NA	NA	NA	NA
SPBC8E4.01c	0.93	0.931	0.974	1.245	1.003	1.157	0.974	0.821	1.017	NA	NA	NA	NA	NA	NA	NA
SPAC24C9.16c	0.929	0.847	0.81	0.923	0.854	0.932	0.817	0.729	0.849	NA	NA	NA	NA	NA	NA	NA
SPAC30C2.05	0.929	0.967	0.924	0.855	0.975	0.824	0.969	0.959	0.84	NA	NA	NA	NA	NA	NA	NA
SPAC30D11.06c	0.929	1.126	1.057	0.9	0.929	0.918	1.043	0.954	0.837	NA	NA	NA	NA	NA	NA	NA
SPBC1539.04	0.929	0.966	0.885	0.898	0.937	0.851	0.946	0.663	0.747	NA	1	NA	1	NA	NA	NA
SPBC1685.08	0.929	0.951	1.116	1.02	0.902	0.965	0.911	0.889	1.073	NA	NA	NA	NA	NA	NA	NA
SPBC29A10.01	0.929	0.848	0.769	0.906	0.87	0.77	0.758	1.152	1.382	NA	NA	NA	NA	NA	NA	NA
SPCC16A11.04	0.929	1.078	0.978	1.096	1.102	1.093	0.999	1.027	1.089	NA	NA	NA	NA	NA	NA	NA
SPCC23B6.02c	0.929	1.023	1.095	0.917	0.921	0.895	1.137	0.953	0.889	NA	NA	NA	NA	NA	NA	NA
SPCC622.19	0.929	0.946	1.022	0.955	0.945	1.005	0.968	1.005	0.865	NA	NA	NA	NA	NA	NA	NA
SPAC23D3.13c	0.928	1.022	1.084	1.077	1.036	0.992	1.122	0.979	0.91	NA	NA	NA	NA	NA	NA	NA
SPBC1271.06c	0.928	0.922	0.697	0.719	0.854	0.552	0.654	0.981	0.963	NA	NA	NA	NA	NA	NA	NA
SPBC15C4.05	0.928	0.942	0.965	0.896	0.927	0.953	0.941	0.957	0.883	NA	NA	NA	NA	NA	NA	NA
SPBC16D10.08c	0.928	1.008	0.932	0.965	0.97	0.944	1.049	0.915	1.079	NA	NA	NA	NA	NA	NA	NA
SPBC28F2.05c	0.928	0.944	1.034	0.972	0.956	0.987	1.029	0.939	0.968	NA	NA	NA	NA	NA	NA	NA
SPCC320.14	0.928	0.969	1.073	1.117	1.04	1.231	0.985	0.843	0.529	NA	NA	NA	NA	NA	NA	NA
SPCC645.11c	0.928	0.957	0.954	0.897	0.98	0.951	0.965	0.986	0.885	NA	NA	NA	NA	NA	NA	NA
SPAC4H3.03c	0.927	0.993	0.948	0.954	0.996	0.965	0.986	0.98	0.883	NA	NA	NA	NA	NA	NA	NA
SPCC1442.02	0.927	1.029	1.049	1.247	1.096	1.082	1.038	1.371	1.017	NA	NA	NA	NA	NA	NA	NA
SPCC1620.13	0.927	0.9	0.892	0.993	0.911	1.045	0.88	0.806	0.924	NA	NA	NA	NA	NA	NA	NA
SPCP1E11.05c	0.927	0.928	1.084	1.33	0.985	1.118	1.094	0.944	1.111	NA	NA	NA	NA	NA	NA	NA
SPAC13G7.07	0.926	0.985	1.118	1.161	1.07	1.125	1.1	1.571	1.596	NA	NA	NA	NA	NA	NA	1
SPAC17A5.04c	0.926	0.981	1	1.187	1.053	1.141	0.99	0.859	1.142	NA	NA	NA	NA	NA	NA	NA
SPAC6G10.10c	0.926	0.93	1.071	0.969	0.945	0.993	1.08	1.115	1.282	NA	NA	NA	NA	NA	NA	NA
SPCC1183.09c	0.926	0.915	0.904	0.86	0.834	0.718	0.908	0.642	0.597	NA	1	NA	1	NA	NA	NA
SPCC1620.07c	0.926	0.938	0.984	0.889	0.968	0.809	0.897	1.021	1.032	NA	NA	NA	NA	NA	NA	NA
SPCC18.13	0.926	0.997	1.068	0.994	1.013	1.097	1.086	1.049	1.134	NA	NA	NA	NA	NA	NA	NA
SPAC1687.13c	0.925	0.932	0.951	1.031	0.997	0.99	0.944	0.765	0.998	NA	NA	NA	NA	NA	NA	NA
SPAC4A8.05c	0.925	1.037	1.191	1.248	1.068	1.169	1.151	1.023	1.289	NA	NA	NA	NA	NA	NA	NA
SPAC977.15	0.925	0.995	0.907	0.895	1	1.037	0.86	0.956	0.948	NA	NA	NA	NA	NA	NA	NA
SPCC1393.13	0.925	1.004	0.792	0.868	1.016	0.802	0.825	0.929	0.884	NA	NA	NA	NA	NA	NA	NA
SPCC584.12	0.925	0.963	0.919	0.843	0.944	0.834	0.993	1.061	1.086	NA	NA	NA	NA	NA	NA	NA
SPBC119.06	0.924	0.889	0.973	0.84	0.892	0.926	0.96	0.163	0.117	NA	1	NA	1	NA	NA	NA
SPCC13B11.02c	0.924	1.024	0.865	0.963	0.98	0.945	0.916	1.464	1.332	NA	NA	NA	NA	NA	NA	NA
SPAC15F9.02	0.923	0.889	0.726	0.872	0.856	0.821	0.793	0.8	0.688	NA	1	NA	1	NA	NA	NA
SPAC3F10.04	0.923	0.97	0.683	0.713	0.922	0.472	0.78	0.825	0.667	NA	1	NA	1	NA	NA	NA
SPAC4F10.16c	0.923	0.93	1.006	0.963	0.905	1	1.032	1.069	0.985	NA	NA	NA	NA	NA	NA	NA
SPAC869.04	0.923	1.041	1.057	1.127	1.119	1.119	1.065	1.034	0.98	NA	NA	NA	NA	NA	NA	NA
SPAPB1A10.10c	0.923	1.052	1.097	1.161	1.004	1.236	1.003	0.858	0.952	NA	NA	NA	NA	NA	NA	NA
SPBC15C4.06c	0.923	0.908	0.799	1.011	0.85	0.952	0.859	0.672	0.894	NA	NA	NA	NA	NA	NA	NA
SPAC10F6.11c	0.922	0.889	0.951	0.905	0.86	0.693	0.855	0.902	0.943	NA	NA	NA	NA	NA	NA	NA
SPAC4G9.06c	0.922	0.799	1.099	1.196	0.959	1.27	1.067	0.837	1.185	NA	NA	NA	NA	NA	NA	NA
SPAC6B12.06c	0.922	0.941	0.946	0.845	0.879	0.933	1.053	0.979	0.977	NA	NA	NA	NA	NA	NA	NA
SPBP4H10.08	0.922	0.772	0.844	0.975	0.771	0.465	0.872	0.762	0.948	NA	NA	NA	NA	NA	NA	NA
SPCC553.12c	0.922	1.043	0.98	1.106	1.057	1.163	1.128	0.897	1.311	NA	NA	NA	NA	NA	NA	NA
SPAC24B11.13	0.921	0.9	1.18	1.026	0.898	1.005	1.234	0.856	0.84	NA	NA	NA	NA	NA	NA	NA
[truncated: 793 more rows]
