# Supplementary material for: Functional and Regulatory Profiling of Energy Metabolism in Fission Yeast
Source: Preprints.org preprint supplement (doi:10.20944/preprints201610.0054.v1), 2016-10-14
Supplement: Supplementary file 1 [file supplementary › Additional file 5.xlsx]

## Sheet: microarray_results
S3 Table. Relative expression data from microarray profiling.
Wild-type cells were grown in YES to OD ~0.5, when medium was changed to YE with 3% glycerol 0,1% glucose.
Cells were harvested at indicated time points after the medium shift.
Data are normalised relative to time point 0 (just before medium shift)
id	0 h	0.2 h	0.5 h	1 h	2 h	4 h	24 h	RNA-seq up-regulated	RNA-seq down-regualted	RNA-seq p < 0.05	cluster A	cluster P	RNA binding	transcrition factor
SPAC1002.02	0	0.14	-0.19	-0.03	0.17	0.22	0.4	NA	NA	1	NA	NA	NA	NA
SPAC1002.03c	0	0.1	-0.18	0.13	0.64	0.41	0.32	NA	NA	NA	NA	NA	NA	NA
SPAC1002.04c	0	0.07	0.27	0.09	0.32	0.1	0.29	NA	NA	NA	NA	NA	NA	NA
SPAC1002.05c	0	0.11	0.63	1.02	0.7	0.29	0.97	1	NA	1	NA	NA	NA	NA
SPAC1002.07c	0	-0.45	-1.43	-0.89	0.51	-0.04	-0.82	NA	NA	NA	NA	NA	NA	NA
SPAC1002.08c	0	0.33	0.37	0.13	-0.15	-0.13	-0.2	NA	NA	NA	NA	NA	NA	1
SPAC1002.09c	0	0	0.26	1.04	1.04	0.18	1.1	NA	NA	1	NA	NA	NA	NA
SPAC1002.10c	0	-0.5	-0.66	-0.37	0.19	0.09	0.09	NA	NA	NA	NA	NA	NA	NA
SPAC1002.11	0	0.14	0.51	0.39	0.46	0.2	-0.08	NA	NA	NA	NA	NA	NA	NA
SPAC1002.12c	0	0.18	0.6	1.52	1.32	0.43	0.98	1	NA	1	NA	NA	NA	NA
SPAC1002.13c	0	-0.26	-1.02	-0.86	-0.22	0.6	0.37	NA	NA	1	NA	NA	NA	NA
SPAC1002.14	0	0.56	0.9	0.47	-0.09	-0.13	0.06	NA	NA	NA	NA	NA	NA	NA
SPAC1002.15c	0	-0.13	0.29	0.13	0.03	0.03	0.04	NA	NA	NA	NA	NA	NA	NA
SPAC1002.17c	0	0.8	-0.12	1.6	-0.63	-1.79	-1.26	NA	1	1	NA	NA	NA	NA
SPAC1002.18	0	0.12	-0.05	0.18	-0.39	-0.64	-0.49	NA	NA	NA	NA	NA	NA	NA
SPAC1002.19	0	0.94	0.53	2.22	0.16	-0.31	0.53	NA	NA	NA	NA	NA	NA	NA
SPAC1006.01	0	0.66	1.64	2.39	1.69	0.86	2.37	1	NA	1	NA	NA	NA	NA
SPAC1006.02	0	-0.23	-0.34	-0.03	-0.04	-0.29	-0.71	NA	NA	NA	NA	NA	NA	NA
SPAC1006.03c	0	-0.19	-0.29	-0.29	-0.19	-0.12	0.1	NA	NA	NA	NA	NA	NA	NA
SPAC1006.05c	0	0.14	0.46	0.55	0.18	-0.03	0.52	NA	NA	NA	NA	NA	NA	NA
SPAC1006.06	0	-0.07	0.02	-0.11	0	0.06	0.3	NA	NA	NA	NA	NA	NA	NA
SPAC1006.07	0	-0.03	-0.38	-0.71	0.01	0.09	-0.26	NA	1	1	NA	NA	1	NA
SPAC1006.08	0	-0.3	-1.14	-1.32	0.03	0.18	-0.08	NA	NA	NA	NA	NA	NA	NA
SPAC1006.09	0	-0.09	-0.33	0.34	0.82	0.75	1.27	NA	NA	NA	NA	NA	NA	NA
SPAC1039.01	0	-0.02	-0.82	-1.16	-1.62	-1.15	-0.1	NA	NA	NA	NA	NA	NA	NA
SPAC1039.02	0	-0.2	-1.92	-2.45	-3.87	-2.92	-3.76	NA	1	1	NA	NA	NA	NA
SPAC1039.03	0	-0.37	-0.22	-0.18	-0.3	-0.12	0.18	NA	NA	NA	NA	NA	NA	NA
SPAC1039.04	0	-0.12	-0.5	-0.29	-0.8	-0.59	-0.47	NA	NA	NA	NA	NA	NA	NA
SPAC1039.05c	0	-0.13	-0.09	0.23	-0.49	-0.16	0.48	NA	NA	1	NA	NA	NA	1
SPAC1039.06	0	-0.1	0.09	0.12	-0.45	-0.13	0.42	NA	NA	NA	NA	NA	NA	NA
SPAC1039.07c	0	0.07	0.29	0.48	0.03	0.01	1.24	1	NA	1	NA	NA	NA	NA
SPAC1039.08	0	-0.79	-1.66	0.16	-0.04	0.01	1.39	1	NA	1	NA	NA	NA	NA
SPAC1039.09	0	0.03	-0.53	1.78	1.1	0.67	4.26	1	NA	1	NA	NA	NA	NA
SPAC1039.11c	0	0.29	0.55	0.98	0.35	0.24	2.2	1	NA	1	NA	NA	NA	NA
SPAC105.01c	0	0.18	0.11	0.21	0.43	0.06	0.18	NA	NA	NA	NA	NA	NA	NA
SPAC105.02c	0	-0.18	-0.01	-0.12	-0.32	0.09	-0.03	NA	NA	NA	NA	NA	NA	NA
SPAC105.03c	0	-0.03	0.31	0.4	0.12	0.05	0	NA	NA	NA	NA	NA	NA	1
SPAC1071.01c	0	0.3	0.6	0.37	0.09	0.23	-0.06	NA	NA	NA	NA	NA	NA	NA
SPAC1071.02	0	0.02	0.24	0.16	-0.03	-0.13	-0.16	NA	NA	NA	NA	1	NA	NA
SPAC1071.03c	0	0.02	-0.15	-0.18	-0.17	-0.06	-0.23	NA	NA	NA	NA	NA	NA	NA
SPAC1071.04c	0	-0.01	-0.06	-0.11	-0.13	0.02	0.03	NA	NA	NA	NA	NA	NA	NA
SPAC1071.05	0	-0.03	-0.16	-0.34	-0.35	-0.3	-0.84	NA	NA	NA	NA	NA	NA	NA
SPAC1071.06	0	-0.1	-0.44	-0.17	-0.1	-0.24	-0.46	NA	NA	NA	NA	NA	NA	NA
SPAC1071.07c	0	-0.02	-0.12	-0.44	-0.35	-0.22	-0.55	NA	1	1	NA	NA	1	NA
SPAC1071.08	0	-0.47	-1.26	-1.81	-0.43	-0.17	-0.98	NA	1	1	NA	NA	NA	NA
SPAC1071.09c	0	-0.09	-0.67	-0.62	-0.3	-0.21	-0.16	NA	NA	NA	NA	NA	NA	NA
SPAC1071.10c	0	0.05	-1.49	-1.74	-0.62	-0.31	0.27	NA	NA	1	NA	NA	NA	NA
SPAC1071.11	0	-0.26	-0.41	0.16	0.22	-0.04	-0.19	NA	NA	NA	NA	1	NA	NA
SPAC1071.12c	0	-0.17	-0.84	-0.92	-0.51	-0.52	-0.84	NA	NA	1	NA	NA	NA	NA
SPAC1093.01	0	0.27	-0.76	-0.22	-0.29	-0.07	0.01	NA	NA	NA	NA	NA	NA	NA
SPAC1093.02	0	-0.11	-0.41	-0.21	-0.23	-0.29	-0.41	NA	NA	NA	NA	NA	NA	NA
SPAC1093.03	0	0.09	0.08	0.22	0.01	0.01	0.24	NA	NA	NA	NA	NA	NA	NA
SPAC1093.04c	0	-0.2	-0.15	0.12	0	-0.03	0.28	NA	NA	NA	NA	NA	1	NA
SPAC1093.05	0	-0.19	-0.93	-0.99	-0.13	0	-0.26	NA	NA	1	NA	NA	NA	NA
SPAC1093.06c	0	-0.1	-0.45	-0.48	-0.08	0.06	-0.22	NA	NA	NA	NA	NA	NA	NA
SPAC10F6.01c	0	0.19	-0.83	-1.12	-0.62	-0.89	-0.18	NA	NA	1	NA	NA	NA	NA
SPAC10F6.02c	0	-0.17	-0.23	-0.24	-0.15	-0.14	-0.1	NA	NA	NA	NA	NA	NA	NA
SPAC10F6.03c	0	0.09	-0.77	-1.27	-0.79	-0.5	-0.88	NA	1	1	NA	NA	NA	NA
SPAC10F6.04	0	0.12	0.25	0.57	0.58	0.34	0.6	NA	NA	1	NA	NA	NA	NA
SPAC10F6.05c	0	0.26	0.96	0.89	0.02	-0.04	0.09	NA	NA	NA	NA	NA	NA	NA
SPAC10F6.06	0	0.53	2.12	2.63	1.75	0.61	1.04	NA	NA	1	NA	NA	1	NA
SPAC10F6.07c	0	0.01	0.83	0.66	0.61	0.62	0.21	NA	NA	NA	NA	NA	NA	NA
SPAC10F6.08c	0	0.05	0.23	0.08	0.07	0.03	-0.13	NA	NA	NA	NA	NA	NA	NA
SPAC10F6.09c	0	-0.05	-0.48	-0.33	-0.3	-0.09	0.18	NA	NA	NA	NA	NA	NA	NA
SPAC10F6.10	0	-0.09	-1.01	-0.92	-0.4	-0.42	-0.72	NA	1	1	NA	NA	NA	NA
SPAC10F6.11c	0	0.1	0.6	1.18	0.71	0.31	0.69	NA	NA	NA	NA	NA	NA	NA
SPAC10F6.12c	0	-0.45	-1.16	-0.98	0.93	0.91	0.83	NA	NA	NA	NA	NA	NA	NA
SPAC10F6.13c	0	0.02	0.24	0.44	-0.08	-0.45	-0.03	NA	NA	1	NA	NA	NA	NA
SPAC10F6.14c	0	0.14	0.5	0.6	0.49	0.2	0.32	NA	NA	NA	NA	NA	NA	NA
SPAC10F6.16	0	0.29	1.07	0.39	-0.16	-0.01	0.01	NA	NA	NA	NA	NA	NA	NA
SPAC10F6.17c	0	0.04	0.25	0.62	0.64	0.35	0.58	NA	NA	1	NA	NA	NA	NA
SPAC110.01	0	-0.49	-1.71	-1.07	-2	-0.57	-0.18	NA	NA	NA	NA	NA	NA	NA
SPAC110.02	0	0.01	-0.07	-0.14	-0.25	-0.22	-0.29	NA	NA	NA	NA	NA	NA	NA
SPAC110.03	0	-0.19	-0.16	0.04	0.23	0.28	0.38	NA	NA	NA	NA	NA	NA	NA
SPAC110.04c	0	0.23	-0.57	-1.64	-0.37	-0.4	-0.93	NA	1	1	NA	NA	NA	NA
SPAC1142.01	0	-0.03	0.01	0.25	0	-0.08	-0.14	NA	NA	NA	NA	NA	NA	NA
SPAC1142.02c	0	-0.12	-0.39	-0.13	0.27	-0.12	-0.22	NA	NA	NA	NA	NA	NA	NA
SPAC1142.03c	0	-0.08	0.41	0.61	0.45	0.39	0.56	NA	NA	1	NA	NA	NA	NA
SPAC1142.04	0	-0.16	-1.17	-1.35	-0.59	-0.37	-0.76	NA	1	1	NA	NA	NA	NA
SPAC1142.05	0	0.57	0.61	0.97	1.7	1.06	-0.26	NA	1	1	NA	NA	NA	NA
SPAC1142.06	0	-0.08	-0.49	-0.65	-0.37	-0.14	-0.43	NA	NA	NA	NA	NA	NA	NA
SPAC1142.07c	0	-0.04	0.27	0.35	0.36	0.04	0.1	NA	NA	NA	NA	NA	NA	NA
SPAC1142.08	0	0.13	0.56	0.46	0.3	0.26	0.52	NA	NA	1	NA	NA	NA	1
SPAC11D3.02c	0	-0.56	-2.03	-0.78	-1.35	-1.02	-1.84	NA	1	1	NA	NA	NA	NA
SPAC11D3.04c	0	-0.11	-0.45	-1.01	-1.46	-0.32	-0.85	NA	1	1	NA	NA	NA	NA
SPAC11D3.05	0	0.24	0.28	0.35	-1.03	-1.07	-1.19	NA	NA	1	NA	NA	NA	NA
SPAC11D3.07c	0	-0.04	0.57	0.69	-0.27	-0.04	0.29	NA	NA	NA	NA	NA	NA	1
SPAC11D3.08c	0	0.47	1.83	1.26	-0.25	0.14	0.76	1	NA	1	NA	NA	NA	NA
SPAC11D3.09	0	0.82	2.03	1.45	-0.08	0.03	0.13	NA	NA	NA	NA	NA	NA	NA
SPAC11D3.10	0	-0.07	0.55	0.64	-0.43	-0.18	-0.27	NA	NA	NA	NA	NA	NA	NA
SPAC11D3.11c	0	-0.08	0.58	0.79	0.06	0.23	0.56	NA	NA	NA	NA	NA	NA	1
SPAC11D3.13	0	-0.08	-0.88	-0.96	-0.64	-0.59	-1.27	NA	1	1	NA	NA	NA	NA
SPAC11D3.14c	0	0.12	-0.26	-0.55	-0.53	-0.39	-0.28	NA	NA	NA	NA	NA	NA	NA
SPAC11D3.15	0	0.13	-0.38	0.47	-0.02	0.07	1.05	NA	NA	NA	NA	NA	NA	NA
SPAC11D3.16c	0	0.16	0.01	1.33	0.48	0.02	1.1	NA	NA	NA	NA	NA	NA	NA
SPAC11D3.17	0	-0.45	-0.42	0.57	-0.46	-0.43	0.49	NA	NA	NA	NA	NA	NA	1
SPAC11D3.18c	0	0.03	-0.02	0.96	0.46	0.3	2.28	1	NA	1	NA	NA	NA	NA
SPAC11E3.01c	0	0.21	0.52	0.26	0.11	0.14	0.35	NA	NA	NA	NA	NA	NA	NA
SPAC11E3.02c	0	0.11	1.04	1.06	0.73	0.7	1.13	NA	NA	1	NA	NA	NA	NA
SPAC11E3.03	0	-0.18	-0.22	-0.27	0.08	-0.08	-0.34	NA	NA	NA	NA	NA	NA	NA
SPAC11E3.04c	0	-0.12	-0.03	-0.01	0.19	0.09	0.11	NA	NA	NA	NA	NA	NA	NA
SPAC11E3.05	0	0.03	0.93	0.93	0.87	0.6	0.9	NA	NA	1	NA	NA	NA	NA
SPAC11E3.06	0	0.09	-0.11	0.03	0.93	0.62	0.99	1	NA	1	NA	NA	NA	1
SPAC11E3.07	0	-0.11	-0.65	-0.95	-0.11	-0.07	-0.19	NA	NA	NA	NA	NA	NA	NA
SPAC11E3.08c	0	0.11	0.17	-0.05	0.07	0.12	0.1	NA	NA	NA	NA	NA	NA	NA
SPAC11E3.09	0	0.09	1	0.45	0.3	0.2	-0.01	NA	NA	NA	NA	NA	NA	NA
SPAC11E3.10	0	-0.32	-0.27	0.15	0.25	0.33	0.81	NA	NA	NA	NA	NA	NA	NA
SPAC11E3.11c	0	-0.14	-0.13	-0.06	0.18	0.22	0.51	NA	NA	NA	NA	NA	NA	NA
SPAC11E3.12	0	-0.31	-0.05	0.2	0.52	0.27	0.71	NA	NA	NA	NA	NA	NA	NA
SPAC11E3.13c	0	0.06	-0.76	-0.7	0.64	0.5	0.5	NA	NA	NA	NA	NA	NA	NA
SPAC11E3.14	0	1.12	2.64	1.49	0.43	0.41	0.98	NA	NA	NA	NA	NA	NA	NA
SPAC11E3.15	0	0.05	-0.27	-0.39	-0.12	-0.02	-0.2	NA	1	1	NA	NA	NA	NA
SPAC11G7.01	0	0.36	0.56	0.33	0.3	0.33	0.24	NA	NA	NA	NA	NA	NA	NA
SPAC11G7.02	0	0.27	0.83	0.94	0.47	0.27	0.38	NA	NA	NA	NA	NA	NA	NA
SPAC11G7.03	0	0.2	1.32	2.32	1.98	1.14	2.03	1	NA	1	NA	NA	NA	NA
SPAC11G7.04	0	0.05	0.02	-0.41	0.03	0.01	0.07	NA	NA	1	NA	NA	NA	NA
SPAC11G7.05c	0	-0.15	0.17	-0.08	0.36	-0.03	0.02	NA	NA	NA	NA	NA	NA	NA
SPAC11G7.06c	0	-0.11	-0.48	-0.41	-0.5	-0.47	-0.63	NA	NA	1	1	NA	NA	NA
SPAC11H11.01	0	0.35	0.71	0.62	0.52	0.5	0.73	NA	NA	1	NA	NA	NA	NA
SPAC11H11.02c	0	0.02	0.03	0.45	0.15	0.09	0.22	NA	NA	NA	NA	NA	NA	NA
SPAC11H11.03c	0	-0.46	-1.14	-0.93	-0.01	0.22	0.23	NA	NA	NA	NA	NA	NA	NA
SPAC11H11.05c	0	-0.19	-0.22	0.01	0.14	0.21	0.38	NA	NA	NA	NA	NA	NA	NA
SPAC11H11.06	0	0.1	0.39	0.14	-0.1	0.05	-0.05	NA	NA	NA	NA	NA	NA	NA
SPAC1250.01	0	-0.03	0.01	0.03	0.22	0.11	0.27	NA	NA	NA	NA	NA	NA	NA
SPAC1250.03	0	-0.22	-0.01	0.42	0.51	0.22	0.29	NA	NA	1	NA	NA	NA	NA
SPAC1250.04c	0	-0.24	-0.43	-0.51	-0.17	-0.3	-0.6	NA	1	1	1	NA	NA	NA
SPAC1250.05	0	-0.62	-1.96	-2.1	-0.14	-0.23	-0.87	NA	1	1	NA	NA	NA	NA
SPAC1250.07	0	-0.18	0.02	0.44	0.59	0.27	0.34	NA	NA	NA	NA	NA	NA	NA
SPAC1296.01c	0	0.31	0.87	1.11	0.56	0.42	0.71	NA	NA	1	NA	NA	NA	NA
SPAC1296.02	0	0.08	0.41	1.12	0.58	0.47	1.02	NA	NA	1	1	NA	NA	NA
SPAC1296.03c	0	-0.14	0.27	0.54	0.58	0.48	0.5	1	NA	1	NA	NA	NA	NA
SPAC1296.04	0	-0.19	0.18	0.6	0.09	0.46	0.47	NA	NA	NA	NA	NA	NA	NA
SPAC1296.05c	0	-0.01	0.11	0.36	0.33	0.24	0.22	NA	NA	NA	NA	NA	NA	NA
SPAC1296.06	0	-0.09	-0.15	-0.23	0.06	-0.1	-0.32	NA	NA	NA	NA	NA	NA	NA
SPAC12B10.01c	0	0.18	0.99	1.15	0.73	0.35	0.87	NA	NA	1	NA	NA	NA	NA
SPAC12B10.02c	0	-0.07	-0.27	-0.52	0.14	0.1	0.11	NA	NA	NA	NA	NA	NA	NA
SPAC12B10.03	0	0.06	0	-0.22	0.02	0.1	0.1	NA	NA	NA	1	NA	NA	NA
SPAC12B10.04	0	-0.15	-0.67	-0.58	-0.09	0.01	-0.31	NA	NA	NA	1	NA	NA	NA
SPAC12B10.05	0	-0.11	-0.17	0.06	-0.02	0.03	0.27	NA	NA	NA	NA	NA	NA	NA
SPAC12B10.06c	0	-0.2	-0.04	-0.07	-0.07	-0.36	-0.49	NA	NA	NA	NA	NA	NA	NA
SPAC12B10.07	0	-0.02	-0.01	-0.19	0.22	0.14	0.17	NA	NA	NA	NA	NA	NA	NA
SPAC12B10.08c	0	-0.15	-0.01	-0.09	0.38	0.3	0.46	NA	NA	NA	NA	NA	NA	NA
SPAC12B10.09	0	-0.44	-0.84	-0.87	-0.47	-0.4	-0.73	NA	NA	NA	1	NA	NA	NA
SPAC12B10.10	0	-0.18	-0.08	0.06	0.05	0.31	0.15	NA	NA	NA	NA	NA	NA	NA
SPAC12B10.11	0	-0.25	-0.12	0.12	-0.05	-0.03	0.01	NA	NA	NA	NA	1	NA	NA
SPAC12B10.12c	0	0.05	0.27	-0.13	0.09	0.19	0.22	NA	NA	NA	NA	NA	NA	NA
SPAC12B10.13	0	0.43	1.22	1.13	0.8	0.43	0.76	1	NA	1	NA	NA	NA	NA
SPAC12B10.14c	0	-0.26	-0.27	-0.04	0.11	0.24	0.68	NA	NA	NA	NA	NA	NA	NA
SPAC12B10.15c	0	-0.37	-0.92	-0.78	-0.31	0.08	0.44	NA	NA	NA	NA	NA	NA	NA
SPAC12B10.16c	0	-0.01	0.02	0.32	0.48	0.35	0.68	NA	NA	1	NA	NA	NA	NA
SPAC12G12.01c	0	-0.04	-0.09	-0.37	-0.07	0.05	0.11	NA	NA	NA	NA	NA	NA	NA
SPAC12G12.02	0	-0.35	-1.08	-1.29	-0.72	-0.37	-0.63	NA	1	1	NA	NA	NA	NA
SPAC12G12.03	0	0.13	0.46	0.19	0.2	0.45	0.51	NA	NA	NA	NA	NA	1	NA
SPAC12G12.04	0	0.11	-0.57	-1.57	0.15	-0.25	0.14	NA	NA	NA	NA	NA	NA	NA
SPAC12G12.05c	0	-0.18	-0.47	-0.54	-0.2	-0.19	-0.59	NA	NA	NA	NA	NA	NA	NA
SPAC12G12.06c	0	-0.16	-0.86	-1.38	-0.69	-0.5	-1.03	NA	1	1	NA	NA	NA	NA
SPAC12G12.07c	0	-0.22	-0.35	-0.53	0.12	0	-0.48	NA	NA	NA	NA	NA	NA	NA
SPAC12G12.08	0	-0.2	-0.23	-0.3	-0.02	-0.1	-0.11	NA	NA	NA	NA	NA	1	NA
SPAC12G12.09	0	0	0.16	0.31	0.23	0.14	0.29	NA	NA	NA	NA	NA	NA	NA
SPAC12G12.10	0	-0.26	0.09	0.34	0.27	0.02	0.13	NA	NA	NA	NA	NA	NA	NA
SPAC12G12.11c	0	-0.06	0.49	0.36	0.31	0.15	0.43	NA	NA	1	NA	NA	NA	NA
SPAC12G12.12	0	0.37	0.99	0.64	0.05	-0.05	0.19	NA	NA	NA	NA	NA	NA	NA
SPAC12G12.13c	0	-0.09	-0.39	-0.67	-0.46	-0.18	-0.41	NA	NA	1	NA	NA	NA	NA
SPAC12G12.14c	0	-0.13	-0.33	-0.37	-0.22	-0.18	-0.14	NA	NA	NA	NA	NA	NA	NA
SPAC12G12.15	0	0.18	0.54	0.34	0.03	0.06	0.07	NA	NA	NA	NA	NA	NA	NA
SPAC12G12.16c	0	0.01	0.56	0.48	0.32	0.12	0.11	NA	NA	NA	NA	NA	NA	NA
SPAC12G12.17	0	-0.21	-0.15	-0.11	-0.22	-0.14	-0.21	NA	NA	NA	NA	NA	NA	NA
SPAC1327.01c	0	-0.2	-0.41	0.07	0.24	0.35	0.74	NA	NA	1	NA	NA	NA	1
SPAC139.01c	0	0.23	0.03	-0.39	-0.26	-0.13	-0.43	NA	NA	NA	NA	NA	NA	NA
SPAC139.02c	0	-0.04	-0.95	0.03	-0.23	-0.37	-0.12	NA	NA	1	NA	NA	NA	NA
SPAC139.03	0	-0.02	0.68	0.6	0.1	-0.08	0.03	NA	NA	NA	NA	NA	NA	1
SPAC139.04c	0	0.18	1.14	1.14	0.02	-0.17	0.36	NA	NA	1	NA	NA	NA	NA
SPAC139.05	0	3.04	6.75	4.01	1.58	0.79	1.33	NA	NA	NA	NA	NA	NA	NA
SPAC139.06	0	-0.14	-1	-0.8	-0.47	-0.18	-0.44	NA	NA	NA	NA	NA	NA	NA
SPAC1399.01c	0	-0.74	-0.68	0.3	0.29	0.07	0.72	1	NA	1	NA	NA	NA	NA
SPAC1399.02	0	-0.12	-0.43	0.23	0.1	-0.02	0.15	NA	NA	NA	NA	NA	NA	NA
SPAC1399.03	0	-0.09	-0.89	-0.65	-0.49	-0.19	-0.19	NA	NA	1	NA	NA	NA	NA
SPAC1399.04c	0	0.15	0.55	0.62	-0.53	-0.32	-0.39	NA	NA	NA	NA	NA	NA	NA
SPAC1399.05c	0	0.2	0.79	0.4	-0.51	-0.18	-0.32	NA	NA	NA	NA	NA	NA	1
SPAC13A11.01c	0	0.04	0.24	0.02	0.18	0.03	0.18	NA	NA	NA	NA	NA	NA	NA
SPAC13A11.02c	0	0.23	-0.08	-0.89	-1.1	-0.52	-0.02	NA	NA	1	NA	NA	NA	NA
SPAC13A11.03	0	-0.12	0.25	0.32	-0.16	-0.47	-0.01	NA	NA	1	1	NA	NA	NA
SPAC13A11.04c	0	-0.21	0.03	0.46	0.32	0.13	0.44	NA	NA	1	NA	NA	NA	NA
SPAC13A11.05	0	0.1	0.25	0.46	0.29	-0.04	0.16	NA	NA	NA	NA	NA	NA	NA
SPAC13A11.06	0	-0.06	0.25	0.79	-0.09	-0.82	-0.53	NA	NA	NA	NA	NA	NA	NA
SPAC13C5.01c	0	0.02	0.13	-0.37	-0.02	-0.09	-0.42	NA	NA	NA	NA	NA	NA	NA
SPAC13C5.02	0	0.13	-0.09	-0.14	-0.16	-0.12	-0.18	NA	NA	NA	NA	NA	NA	NA
SPAC13C5.03	0	-0.15	0.33	0.27	0.14	0.03	0.09	NA	NA	NA	NA	NA	NA	NA
SPAC13C5.04	0	0.82	3.02	3.08	1.15	0.08	0.95	NA	NA	NA	NA	NA	NA	NA
SPAC13C5.05c	0	0.16	0.08	-0.11	0.04	-0.13	1.1	NA	NA	NA	NA	NA	NA	NA
SPAC13C5.06c	0	0.92	2.18	1.89	-0.56	-0.39	0.47	NA	NA	NA	NA	NA	NA	NA
SPAC13C5.07	0	-0.02	-0.2	-0.1	0.08	0.04	0.21	NA	NA	NA	NA	NA	NA	NA
SPAC13D6.01	0	0.08	0.8	0.35	0.07	0.37	0.02	NA	NA	NA	NA	NA	NA	NA
SPAC13D6.02c	0	-0.44	-1.42	-1.57	-0.32	-0.2	-0.81	NA	1	1	NA	NA	1	NA
SPAC13D6.03c	0	-0.47	-1.21	-0.95	-0.23	-0.09	-0.4	NA	NA	NA	NA	NA	NA	NA
SPAC13D6.04c	0	-0.23	0	-0.02	0.37	0.2	0.47	NA	NA	NA	NA	NA	NA	NA
SPAC13D6.05	0	0.15	0.79	0.68	0.38	0.08	0.41	NA	NA	NA	NA	NA	NA	NA
SPAC13F5.01c	0	-0.06	-0.12	-0.08	-0.23	-0.19	-0.39	NA	NA	NA	NA	NA	NA	NA
SPAC13F5.02c	0	0.11	-0.03	0.01	0.45	0.25	0.38	NA	NA	NA	NA	NA	NA	NA
SPAC13F5.03c	0	2.97	6.41	6.82	4.91	4.44	7.37	1	NA	1	NA	NA	NA	NA
SPAC13F5.04c	0	0.14	0.67	0.44	0.2	0.15	0.43	NA	NA	NA	NA	NA	NA	NA
SPAC13F5.05	0	0.71	0.98	1.02	0.63	0.64	0.97	NA	NA	1	NA	NA	NA	NA
SPAC13F5.06c	0	0.28	0.45	0.23	0.01	0.1	0.24	NA	NA	NA	NA	NA	NA	NA
SPAC13F5.07c	0	0.09	1.13	1.06	0.95	1.31	1.68	1	NA	1	NA	NA	NA	NA
SPAC13G6.01c	0	-0.22	-0.52	-0.76	-0.45	-0.12	-0.25	NA	1	1	NA	NA	NA	NA
SPAC13G6.02c	0	-0.04	-0.43	-0.86	-0.13	0.02	-0.27	NA	NA	1	NA	NA	NA	NA
SPAC13G6.03	0	-0.27	0.02	0.44	-0.17	-0.27	-0.09	NA	NA	NA	NA	NA	NA	NA
SPAC13G6.04	0	-0.28	-0.33	-0.09	0.1	-0.11	-0.25	NA	NA	NA	NA	NA	NA	NA
SPAC13G6.05c	0	-0.02	0.11	0.07	0.23	0.08	0.22	NA	NA	NA	NA	NA	NA	NA
SPAC13G6.06c	0	0.07	-1.28	-1.36	-0.71	-0.39	0.38	NA	NA	NA	NA	NA	NA	NA
SPAC13G6.07c	0	-0.03	-0.22	-0.66	-0.15	-0.1	-0.25	NA	1	1	NA	NA	NA	NA
SPAC13G6.09	0	-0.39	-0.91	-0.8	-0.01	0.04	-0.25	NA	NA	NA	NA	NA	NA	NA
SPAC13G6.10c	0	0.02	-1.08	-0.79	-0.4	0.46	0.92	NA	NA	NA	NA	NA	NA	NA
SPAC13G6.11c	0	0.1	0.26	-0.13	-0.14	-0.09	-0.26	NA	NA	NA	NA	NA	NA	NA
SPAC13G6.14	0	0.11	0.1	0.14	-0.07	-0.14	-0.24	NA	NA	NA	1	NA	NA	NA
SPAC13G6.15c	0	-0.09	0.27	0.39	-0.18	-0.32	-0.46	NA	NA	NA	NA	NA	NA	NA
SPAC13G7.01c	0	-0.03	-0.32	-0.59	-0.59	-0.44	-0.24	NA	NA	NA	NA	NA	NA	NA
SPAC13G7.02c	0	3.07	4.37	2.3	2.41	1.52	2.33	1	NA	1	NA	NA	NA	NA
SPAC13G7.03	0	0.5	0.43	0.42	0.07	0.12	0.2	NA	NA	NA	NA	NA	NA	NA
SPAC13G7.04c	0	0.58	-0.51	-0.38	0.1	0.26	0.72	NA	NA	NA	NA	NA	NA	NA
SPAC13G7.05	0	0.97	1.77	0.66	-0.33	0.2	0.18	NA	NA	NA	NA	NA	NA	NA
SPAC13G7.06	0	-0.05	-0.61	-1.23	-0.99	-1.13	-1.65	NA	1	1	NA	NA	NA	NA
SPAC13G7.07	0	-0.04	-0.06	0.3	0.15	0.06	-0.11	NA	NA	1	NA	NA	1	NA
SPAC13G7.08c	0	-0.07	-0.55	-0.55	-0.23	-0.14	-0.67	NA	NA	1	NA	NA	NA	NA
SPAC13G7.09c	0	-0.26	-0.15	0.06	-0.04	-0.13	-0.27	NA	NA	NA	NA	NA	NA	NA
SPAC13G7.10	0	0.11	0.55	0.21	0.36	0.3	0.33	NA	NA	NA	NA	NA	NA	NA
SPAC13G7.11	0	0	0.61	0.27	0.12	0.09	0	NA	NA	NA	1	NA	NA	NA
SPAC13G7.12c	0	-0.04	0.59	0.22	0.4	0.53	0.11	NA	NA	1	NA	NA	NA	NA
SPAC13G7.13c	0	-0.58	-1.38	-0.26	0.04	-0.55	0.62	NA	NA	1	NA	NA	1	NA
SPAC140.01	0	0.35	1.28	1.88	0.45	-0.85	1.24	NA	NA	NA	NA	NA	NA	NA
SPAC140.02	0	-0.11	-1	-0.94	-0.89	-0.31	-0.44	NA	1	1	NA	NA	1	NA
SPAC140.03	0	-0.27	-0.57	-0.38	-0.2	-0.3	0.02	NA	NA	NA	NA	NA	NA	NA
SPAC140.04	0	0.12	0.16	-0.04	0.29	0.18	0.27	NA	NA	NA	NA	NA	NA	NA
SPAC1420.01c	0	0.11	0.17	0.15	0.04	0.13	0.26	NA	NA	NA	NA	NA	NA	NA
SPAC1420.02c	0	0.06	-0.45	-0.86	-0.15	-0.14	-0.56	NA	NA	NA	NA	NA	NA	NA
SPAC1420.03	0	0.04	0.03	-0.13	0.29	0.03	-0.06	NA	NA	NA	NA	NA	NA	NA
SPAC1420.04c	0	0.09	0.28	0.6	0.44	0.29	0.68	NA	NA	NA	NA	NA	NA	NA
SPAC144.01	0	0.11	-0.27	-0.47	-0.11	0.04	-0.19	NA	NA	NA	NA	NA	NA	NA
SPAC144.02	0	-0.12	0.31	0.3	0.17	0.14	0.19	NA	NA	NA	NA	NA	NA	NA
SPAC144.03	0	0.08	-0.33	-0.51	-0.67	-0.57	-0.45	NA	NA	1	NA	NA	NA	NA
SPAC144.04c	0	0.14	0.5	0.93	0.48	0.19	0.43	NA	NA	NA	NA	NA	NA	NA
SPAC144.05	0	-0.22	0.06	0.29	0.29	0.13	0.42	NA	NA	NA	NA	NA	NA	NA
SPAC144.06	0	0.02	0.33	0.12	0.11	0.11	0.11	NA	NA	NA	NA	NA	NA	NA
SPAC144.07c	0	-0.26	-0.42	-0.19	0.04	-0.08	-0.13	NA	NA	NA	NA	NA	NA	NA
SPAC144.08	0	-0.34	-0.23	0.09	0.21	0.02	0.18	NA	NA	NA	NA	NA	NA	NA
SPAC144.09c	0	-0.36	-0.88	-0.31	-0.14	0.01	0.02	NA	NA	NA	NA	NA	NA	NA
SPAC144.10c	0	0.42	0.6	1.01	0.69	0.31	1.39	NA	NA	1	NA	NA	NA	NA
SPAC144.11	0	-0.05	-0.57	-0.88	-0.05	-0.11	-0.38	NA	NA	1	NA	NA	1	NA
SPAC144.12	0	-0.19	-1.2	0	0.51	0.63	1.32	1	NA	1	NA	NA	NA	NA
SPAC144.13c	0	-0.29	-0.3	0.28	0.3	0.41	0.74	1	NA	1	NA	NA	NA	NA
SPAC144.14	0	-0.44	-0.95	-0.8	-0.31	0.04	0.42	NA	NA	NA	NA	NA	NA	NA
SPAC144.15c	0	-0.28	-0.4	-0.48	0.06	0.26	0.45	NA	NA	NA	NA	NA	NA	NA
SPAC144.16	0	-0.12	0.24	0.31	0.29	0.23	0.28	NA	NA	NA	NA	NA	NA	NA
SPAC144.17c	0	0.04	0.94	0.65	0.53	0.27	0.56	NA	NA	NA	NA	NA	NA	NA
SPAC144.18	0	0.18	0.26	-0.47	-0.42	-0.32	-0.55	NA	NA	NA	NA	NA	NA	NA
SPAC1486.01	0	-0.09	0.72	1.63	1.51	0.37	1.25	1	NA	1	1	NA	NA	NA
SPAC1486.02c	0	-0.05	0.26	0.32	0.19	0.08	0.04	NA	NA	NA	NA	NA	NA	NA
SPAC1486.03c	0	0.26	0.45	-0.03	0.31	0.2	0.25	NA	NA	NA	NA	NA	1	NA
SPAC1486.04c	0	-0.18	-0.61	-0.36	0.06	0.15	0	NA	NA	NA	NA	NA	NA	NA
SPAC1486.05	0	0.18	0.04	-0.18	-0.01	0.11	0.17	NA	NA	NA	NA	NA	NA	NA
SPAC1486.06	0	-0.17	-0.37	-0.58	-0.39	-0.29	-0.33	NA	NA	1	NA	NA	NA	NA
SPAC1486.07c	0	-0.12	-0.15	-0.35	-0.28	-0.13	-0.28	NA	NA	NA	NA	NA	NA	NA
SPAC1486.08	0	-0.54	-1	-0.53	-0.29	-0.24	-0.25	NA	NA	NA	NA	NA	NA	NA
SPAC1486.09	0	-0.28	-1.27	-1.22	-0.33	-0.14	-0.46	NA	1	1	NA	NA	1	NA
SPAC1486.10	0	-0.14	-0.31	-0.26	-0.05	-0.01	-0.04	NA	NA	1	NA	NA	NA	1
SPAC1486.11	0	-0.12	0.14	0.29	0.09	0.12	1.18	NA	NA	NA	NA	NA	NA	NA
SPAC14C4.01c	0	0.13	1.47	2.29	1.99	1.5	2.17	NA	NA	NA	NA	NA	NA	NA
SPAC14C4.02c	0	-0.26	-0.73	-0.37	-0.14	-0.17	-0.23	NA	NA	NA	NA	NA	NA	NA
SPAC14C4.04	0	0.16	0.4	0	-0.15	-0.17	0	NA	NA	NA	NA	NA	NA	NA
SPAC14C4.05c	0	0.2	0.1	-0.15	0.04	0.06	0.06	NA	NA	NA	NA	NA	NA	NA
SPAC14C4.06c	0	0.36	0.75	0.04	0.04	-0.12	0.08	NA	NA	NA	NA	1	1	NA
SPAC14C4.07	0	0.53	1.24	0.96	0.83	0.54	1.43	NA	NA	1	NA	NA	NA	NA
SPAC14C4.09	0	-0.35	-0.71	-1.4	-0.83	-0.18	-0.31	NA	NA	NA	NA	NA	NA	NA
SPAC14C4.10c	0	0.2	0.64	0.64	0.48	0.18	0.47	NA	NA	NA	NA	NA	NA	NA
SPAC14C4.11	0	0.17	-0.43	-1.01	-0.07	-0.07	-0.32	NA	NA	NA	NA	NA	NA	NA
SPAC14C4.12c	0	0.12	-0.51	-0.66	-0.49	-0.04	-0.79	NA	NA	NA	NA	NA	NA	NA
SPAC14C4.13	0	-0.55	-1.35	-0.61	0.1	0.13	-0.06	NA	1	1	NA	NA	NA	NA
SPAC14C4.14	0	0.16	0.79	1.49	1.27	1.05	1.94	1	NA	1	NA	NA	NA	NA
SPAC14C4.15c	0	0.09	0.04	-0.42	-0.53	-0.08	-0.39	NA	NA	NA	NA	NA	NA	NA
SPAC14C4.16	0	-0.27	-0.13	-0.15	-0.48	-0.5	-0.39	NA	NA	NA	NA	NA	NA	NA
SPAC1527.01	0	0.17	0.31	0.23	-0.11	-0.04	0.12	NA	NA	NA	NA	NA	NA	NA
SPAC1527.02	0	0.2	0.29	-0.03	0.11	0.05	-0.04	NA	NA	NA	NA	NA	NA	NA
SPAC1527.03	0	-0.62	-0.96	-1.12	-0.14	-0.08	-0.22	NA	1	1	NA	NA	1	NA
SPAC1556.01c	0	-0.23	0.19	0.52	0.78	0.26	0.47	NA	NA	1	NA	NA	NA	NA
SPAC1556.02c	0	0.44	1.09	1.73	1.39	-0.19	1.46	NA	NA	NA	NA	NA	NA	NA
SPAC1556.03	0	0.13	0.84	0.75	0.05	-0.2	0.45	NA	NA	NA	NA	NA	NA	NA
SPAC1556.05c	0	-0.31	-1.23	-1.04	-0.31	-0.24	-0.3	NA	NA	1	NA	NA	NA	NA
SPAC1556.07	0	-0.12	-0.99	-1.35	-0.52	-0.18	0.06	NA	NA	NA	NA	NA	NA	NA
SPAC1556.08c	0	-0.05	-0.28	0.3	0.37	0.33	0.3	NA	NA	1	NA	NA	NA	NA
SPAC1565.01	0	-0.13	-0.78	-0.36	-0.58	0.02	1.08	NA	NA	NA	NA	NA	NA	NA
SPAC1565.02c	0	-0.05	-0.22	-0.02	0.02	0.1	0.32	NA	NA	NA	NA	NA	NA	NA
SPAC1565.04c	0	-0.17	-0.64	0.31	1.37	0.98	1.43	1	NA	1	NA	1	NA	NA
SPAC1565.05	0	-0.14	-1.02	-0.96	-0.35	-0.18	-0.4	NA	1	1	NA	NA	1	NA
SPAC1565.06c	0	0.72	1.45	0.95	0.08	0.18	0.17	NA	NA	NA	NA	NA	NA	NA
SPAC1565.07c	0	0.04	-0.09	-0.09	0.33	0.03	0.15	NA	NA	NA	NA	NA	NA	NA
SPAC1565.08	0	0.25	0.38	0.27	0.44	0	0.09	NA	NA	NA	NA	NA	NA	NA
SPAC15A10.01	0	0.03	0.61	0.95	0.35	0.1	0.4	NA	NA	NA	NA	NA	NA	NA
SPAC15A10.02	0	0.01	-0.52	-0.68	0	-0.05	-0.26	NA	NA	NA	NA	NA	NA	NA
SPAC15A10.03c	0	0.26	-0.59	-0.31	0.1	-0.07	0.35	NA	NA	NA	NA	NA	NA	NA
SPAC15A10.04c	0	-0.04	-1.52	-1.63	-0.56	-0.52	-0.93	NA	1	1	NA	NA	NA	NA
SPAC15A10.05c	0	0.36	1.63	2.63	2.57	1.07	1.8	NA	NA	NA	NA	NA	NA	NA
SPAC15A10.06	0	0.13	0.09	0.3	0.34	0.12	0.47	NA	NA	1	NA	NA	NA	NA
SPAC15A10.07	0	0.14	0	-0.06	0.01	0.16	-0.22	NA	NA	NA	NA	NA	NA	NA
SPAC15A10.08	0	-0.14	-0.97	-0.69	0.12	-0.07	-0.14	NA	NA	NA	NA	NA	NA	NA
SPAC15A10.09c	0	0.14	0.29	0.42	0.25	0.35	0.82	NA	NA	1	NA	NA	NA	NA
SPAC15A10.10	0	0.15	-0.25	0.02	-0.02	0.25	1.51	NA	NA	NA	NA	NA	NA	NA
SPAC15A10.11	0	0.04	0.01	0.19	0.31	0.26	0.51	NA	NA	NA	NA	NA	NA	NA
SPAC15A10.12c	0	0.06	0.04	0.23	0.02	0.07	0.01	NA	NA	NA	NA	NA	NA	NA
SPAC15A10.13	0	-0.36	-0.73	-0.38	0.11	0.08	-0.04	NA	NA	NA	NA	NA	NA	NA
SPAC15A10.15	0	-0.59	-0.29	-0.1	-0.09	-0.02	0.36	NA	NA	NA	1	NA	NA	NA
SPAC15A10.16	0	0.04	0.54	0.63	0.31	0.31	0.58	NA	NA	NA	NA	NA	NA	NA
SPAC15A10.17	0	-0.11	0.67	0.91	-0.35	-0.26	0.2	NA	NA	NA	NA	NA	NA	NA
SPAC15E1.02c	0	1.65	4.8	4.84	3.45	1.96	3.49	1	NA	1	NA	NA	NA	NA
SPAC15E1.03	0	-0.11	-0.2	-0.3	0	0.05	0.01	NA	NA	1	NA	NA	NA	NA
SPAC15E1.04	0	0.25	0.41	0.18	0.32	0.13	0.23	NA	NA	1	NA	NA	NA	NA
SPAC15E1.05c	0	-0.25	-0.29	-0.28	-0.14	-0.15	-0.08	NA	NA	NA	NA	NA	NA	NA
SPAC15E1.06	0	-0.35	-0.24	-0.18	0.18	0.07	0.09	NA	NA	NA	NA	NA	NA	NA
SPAC15E1.08	0	-0.07	-0.18	-0.25	-0.54	-0.46	-0.68	NA	NA	1	NA	NA	NA	NA
SPAC15E1.09	0	-0.03	0.03	-0.25	-0.3	-0.11	-0.02	NA	NA	NA	NA	NA	NA	NA
SPAC15E1.10	0	0.22	1.41	1.13	0.58	-0.02	0.3	1	NA	1	NA	NA	NA	NA
SPAC15F9.02	0	-0.09	-0.69	-0.6	-0.39	-0.38	-0.71	NA	NA	NA	1	NA	NA	NA
SPAC15F9.03c	0	-0.25	-0.38	-0.24	-0.14	-0.18	-0.39	NA	NA	NA	NA	NA	NA	NA
SPAC16.01	0	0.25	0.35	0.14	-0.08	0.02	0.04	NA	NA	NA	NA	NA	NA	NA
SPAC16.02c	0	-0.04	-0.58	-0.83	-0.33	0.09	-0.04	NA	NA	NA	NA	NA	1	NA
SPAC16.03c	0	0.04	-0.48	-0.64	-0.16	-0.17	-0.64	NA	NA	1	NA	NA	NA	NA
SPAC16.04	0	-0.22	-0.84	-0.81	0.22	0.11	0.02	NA	NA	NA	NA	NA	NA	NA
SPAC16.05c	0	-0.26	0.22	-0.4	-0.19	0.02	0.56	NA	NA	NA	NA	NA	NA	1
SPAC1610.01	0	-0.21	-0.51	-0.31	-0.04	-0.22	-0.25	NA	NA	NA	NA	NA	NA	NA
SPAC1610.02c	0	-0.16	0.42	0.52	0.1	-0.01	0.12	NA	NA	NA	1	NA	NA	NA
SPAC1610.04	0	0.07	0.89	1.51	0.47	0.29	0.73	NA	NA	1	NA	NA	NA	NA
SPAC1635.01	0	0.16	1.14	1.86	1.67	0.42	1.42	1	NA	1	NA	NA	NA	NA
SPAC1639.01c	0	0.49	1.94	0.94	-0.27	0.39	0.2	NA	NA	NA	NA	NA	NA	NA
SPAC1639.02c	0	-0.02	-0.32	-0.13	-0.13	0.03	0.05	NA	NA	NA	NA	NA	NA	NA
SPAC167.01	0	0.12	0.34	0.57	0.35	0	0.33	NA	NA	NA	NA	NA	NA	NA
SPAC167.02	0	-0.1	-0.21	-0.22	-0.15	-0.07	0.03	NA	NA	NA	NA	NA	NA	NA
SPAC167.03c	0	0.27	0.28	0.11	0.08	0.11	0.38	NA	NA	NA	NA	NA	NA	NA
SPAC167.04	0	-0.12	0.08	0.07	-0.23	-0.13	0.11	NA	NA	NA	NA	NA	NA	NA
SPAC167.05	0	0.34	1.26	1.22	0.97	0.46	1	1	NA	1	NA	NA	NA	NA
SPAC167.06c	0	1.1	3.03	2.53	1.23	0.87	1.96	1	NA	1	NA	NA	NA	NA
SPAC167.07c	0	0.13	0.47	0.24	0.19	-0.05	0.15	NA	NA	NA	NA	NA	NA	NA
SPAC167.09	0	-0.08	0.49	0.8	0.28	-0.12	0.19	NA	NA	NA	NA	NA	NA	NA
SPAC1687.01	0	-0.21	-0.84	-1.22	-0.36	-0.15	-0.66	NA	1	1	NA	NA	NA	NA
SPAC1687.02	0	-0.22	-0.77	-0.19	0.09	0	0.18	NA	NA	NA	NA	NA	NA	NA
SPAC1687.03c	0	-0.3	-1.33	-1.35	-0.59	-0.51	-0.72	NA	NA	1	NA	NA	NA	NA
SPAC1687.04	0	0.08	0.08	-0.11	-0.08	-0.26	0.2	NA	NA	1	NA	NA	NA	NA
SPAC1687.05	0	-0.11	-0.21	-0.31	-0.04	0.05	0.07	NA	NA	NA	NA	NA	NA	NA
SPAC1687.06c	0	-0.12	-1	-1.65	-0.17	0.03	-0.34	NA	1	1	NA	NA	NA	NA
SPAC1687.07	0	0.64	1.54	1.82	0.66	0.42	1.21	NA	NA	NA	NA	NA	NA	NA
SPAC1687.08	0	0.64	1.42	1.26	0.36	0.36	1.02	NA	NA	NA	NA	NA	NA	NA
SPAC1687.09	0	0.37	0.81	0.77	0.35	0.32	0.63	NA	NA	1	NA	NA	NA	NA
SPAC1687.10	0	-0.09	-0.53	-0.19	-0.06	-0.09	-0.1	NA	NA	NA	NA	NA	NA	NA
SPAC1687.11	0	-0.3	-0.72	-0.75	-0.12	-0.09	-0.34	NA	1	1	NA	NA	NA	NA
SPAC1687.12c	0	-0.07	-0.04	0.23	0.11	-0.05	0.2	NA	NA	NA	NA	NA	NA	NA
SPAC1687.13c	0	0.02	-0.03	0.11	0.14	-0.13	-0.07	NA	NA	NA	NA	NA	NA	NA
SPAC1687.14c	0	0.91	1.93	1.54	0.41	0.36	1.16	NA	NA	1	NA	NA	NA	NA
SPAC1687.15	0	0.49	0.93	0.61	-0.01	0.19	0.27	NA	NA	1	1	NA	NA	NA
SPAC1687.16c	0	0.43	-0.79	-0.93	-1.22	-0.52	0.32	NA	NA	1	NA	NA	NA	NA
SPAC1687.17c	0	0.18	0.27	0.3	-0.26	-0.31	0.1	NA	NA	NA	NA	NA	NA	NA
SPAC1687.18c	0	-0.06	-0.23	-0.04	-0.04	-0.09	0.06	NA	NA	NA	NA	NA	NA	NA
SPAC1687.19c	0	-0.23	-0.42	-0.4	-0.08	-0.12	-0.29	NA	NA	NA	NA	NA	NA	NA
SPAC1687.20c	0	-0.27	-0.25	0.12	0.12	-0.02	0.02	NA	NA	NA	NA	NA	NA	NA
SPAC1687.21	0	-0.27	-0.61	-0.43	-0.49	-0.43	-0.37	NA	NA	NA	NA	NA	NA	NA
SPAC1687.22c	0	0.72	1.5	1.52	0.76	0.44	1.05	1	NA	1	NA	NA	1	NA
SPAC16A10.01	0	1.53	2.79	1.78	0.25	0.12	1.26	1	NA	1	NA	NA	NA	NA
SPAC16A10.02	0	-0.21	-0.43	-0.19	0.12	0.14	-0.08	NA	NA	NA	NA	NA	NA	NA
SPAC16A10.03c	0	-0.07	0.14	0.19	0.2	0.22	0.28	NA	NA	NA	NA	NA	NA	NA
SPAC16A10.04	0	-0.28	-0.15	-0.46	0.08	0.12	0.06	NA	NA	NA	NA	NA	NA	NA
SPAC16A10.05c	0	-0.14	-0.31	0.12	0.07	-0.17	-0.28	NA	NA	NA	NA	NA	NA	NA
SPAC16A10.06c	0	-0.08	0	0.47	0.22	-0.03	0.24	NA	NA	NA	NA	NA	NA	NA
SPAC16A10.07c	0	0.24	-0.61	-0.61	0.08	0.19	0.21	NA	NA	NA	NA	NA	NA	NA
SPAC16A10.08c	0	-0.03	0.34	0.55	0.64	0.43	0.63	NA	NA	NA	NA	NA	NA	NA
SPAC16C9.01c	0	0.36	0.91	0.56	0.3	-0.04	0.52	NA	NA	1	NA	NA	NA	NA
SPAC16C9.02c	0	-0.31	-1.76	-2.07	-1.34	-0.91	-1.57	NA	1	1	NA	NA	NA	NA
SPAC16C9.03	0	-0.05	-0.9	-1.16	-0.33	-0.23	-0.54	NA	1	1	NA	NA	NA	NA
SPAC16C9.04c	0	0.31	0.77	0.7	0.44	0.39	1.33	NA	NA	NA	NA	NA	1	NA
SPAC16C9.05	0	0.13	-0.04	-0.41	-0.15	-0.44	-0.5	NA	NA	NA	NA	NA	NA	NA
SPAC16C9.06c	0	0.14	0.13	-0.55	-0.34	-0.15	-0.5	NA	NA	1	NA	NA	NA	NA
SPAC16C9.07	0	-0.19	-0.12	-0.03	0.33	0.36	0.04	NA	NA	NA	NA	NA	NA	NA
SPAC16E8.01	0	-0.05	-0.37	0.19	0.1	0.22	0.42	NA	NA	NA	NA	NA	NA	NA
SPAC16E8.02	0	0.41	1.14	2.05	1.34	0.49	0.93	NA	NA	NA	NA	NA	NA	NA
SPAC16E8.03	0	0.17	1.12	2.01	1.25	0.46	1.05	1	NA	1	NA	NA	NA	NA
SPAC16E8.04c	0	0	-0.51	-1.07	-0.09	-0.17	-0.2	NA	NA	1	NA	NA	NA	NA
SPAC16E8.05c	0	-0.46	-0.12	0.06	0	-0.23	-0.66	NA	NA	NA	NA	NA	NA	NA
SPAC16E8.06c	0	-0.23	-1.7	-1.51	-0.5	-0.34	-0.84	NA	1	1	NA	NA	1	NA
SPAC16E8.07c	0	0.35	0.34	0.04	-0.07	0.03	0.16	NA	NA	NA	NA	NA	NA	NA
SPAC16E8.08	0	0.2	-0.17	-0.24	-0.05	0.14	0.12	NA	NA	NA	NA	NA	NA	NA
SPAC16E8.09	0	-0.11	0.05	0.02	0.29	0.16	0.35	NA	NA	NA	NA	NA	NA	NA
SPAC16E8.10c	0	-0.29	-0.29	-0.11	0.13	-0.01	-0.14	NA	NA	NA	NA	NA	1	NA
SPAC16E8.11c	0	0.06	-0.37	-0.78	-0.44	-0.43	-0.62	NA	NA	NA	NA	NA	NA	NA
SPAC16E8.12c	0	-0.3	-0.2	-0.21	-0.15	-0.12	0.06	NA	NA	NA	NA	NA	NA	NA
SPAC16E8.13	0	0.26	0.64	0.62	0.35	-0.08	-0.06	NA	NA	NA	NA	NA	NA	NA
SPAC16E8.14c	0	-0.13	-0.62	-0.35	0.05	-0.3	-0.56	NA	NA	NA	NA	NA	NA	NA
SPAC16E8.15	0	0.08	-0.7	-0.8	-0.22	-0.13	-0.5	NA	NA	1	NA	NA	1	NA
SPAC16E8.16	0	-0.06	0.81	1.8	1.19	0.56	0.73	NA	NA	NA	NA	NA	NA	NA
SPAC16E8.17c	0	-0.07	-0.17	0.19	0.42	0.24	0.08	NA	NA	1	NA	NA	NA	NA
SPAC16E8.18	0	-0.3	0.04	-0.02	0	0.08	0.17	NA	NA	NA	NA	NA	NA	NA
SPAC16E8.18c	0	-0.05	-0.13	0.18	0.13	0	0.09	NA	NA	NA	NA	NA	NA	NA
SPAC1705.02	0	-0.3	-0.61	-0.16	-0.01	-0.1	-0.15	NA	NA	NA	NA	NA	NA	NA
SPAC1705.03c	0	0.18	-0.72	-0.41	0.8	0.61	1.24	NA	NA	NA	NA	NA	NA	NA
SPAC1751.01c	0	1.98	3.05	2.19	0.96	1.04	1.68	1	NA	1	NA	NA	NA	NA
SPAC1751.02c	0	-0.18	-0.27	-0.12	0.05	0.1	0.12	NA	NA	NA	NA	NA	1	NA
SPAC1751.03	0	0.05	-0.3	-0.54	-0.23	-0.17	-0.33	NA	NA	1	NA	NA	1	NA
SPAC1751.04	0	0.19	0	0.12	-0.09	0.07	0.02	NA	NA	1	NA	NA	NA	NA
SPAC1782.01	0	0.01	0.21	0.22	0.23	0	0.33	NA	NA	NA	NA	NA	NA	NA
SPAC1782.02c	0	-0.05	-0.43	-0.42	-0.06	-0.1	-0.13	NA	NA	NA	NA	NA	NA	NA
SPAC1782.03	0	0.29	0.24	0.09	0.16	0.02	0.03	NA	NA	NA	NA	NA	NA	NA
SPAC1782.04	0	0.04	0.44	0.03	-0.07	0.03	-0.19	NA	NA	NA	NA	NA	NA	NA
SPAC1782.05	0	0.19	0.43	0.37	0.37	0.08	0.17	NA	NA	NA	NA	NA	NA	NA
SPAC1782.06c	0	0.08	0.55	0.69	0.49	0.25	0.45	NA	NA	1	NA	NA	NA	NA
SPAC1782.07	0	-0.13	0.39	0.98	0.42	0.39	1.04	NA	NA	1	NA	NA	NA	NA
SPAC1782.08c	0	-0.45	-0.39	-0.41	0.04	0.24	0.19	NA	NA	NA	NA	1	NA	NA
SPAC1782.09c	0	-0.18	-0.17	-0.2	0.12	0.31	0.1	NA	NA	NA	NA	NA	NA	NA
SPAC1782.10c	0	-0.05	-0.78	-1.23	-0.47	-0.26	-0.74	NA	1	1	NA	NA	1	NA
SPAC1782.11	0	-0.23	-1.14	-1.71	-0.95	-0.55	-1.12	NA	1	1	NA	NA	NA	NA
SPAC1782.12c	0	0.01	0.53	0.57	0.76	0.37	0.43	1	NA	1	NA	NA	NA	NA
SPAC1783.01	0	0.25	0.5	0.15	0.17	0.42	0.15	NA	NA	NA	NA	NA	NA	NA
SPAC1783.02c	0	-0.14	-0.13	0.03	0.18	-0.08	-0.04	NA	NA	NA	NA	NA	NA	NA
SPAC1783.03	0	-0.21	-0.38	-0.11	-0.19	-0.18	-0.2	NA	NA	1	NA	NA	NA	NA
SPAC1783.04c	0	-0.24	-0.27	0.08	-0.11	0.04	0.17	NA	NA	NA	NA	NA	NA	NA
SPAC1783.05	0	-0.14	-0.61	-0.59	-0.2	-0.19	-0.22	NA	NA	1	NA	NA	NA	NA
SPAC1783.06c	0	-0.07	0.08	-0.02	0.04	-0.11	0.05	NA	NA	NA	NA	NA	NA	NA
SPAC1783.07c	0	0.53	0.44	0.26	0.34	0	0.68	NA	NA	NA	NA	NA	NA	1
SPAC1783.08c	0	0.08	-0.23	-0.7	-0.37	-0.15	-0.69	NA	1	1	NA	NA	NA	NA
SPAC1786.01c	0	0.27	1.36	0.92	0.79	0.83	0.67	NA	NA	NA	NA	NA	NA	NA
SPAC1786.02	0	-0.31	-1.5	-2.29	-1.85	-1.39	-1.3	NA	1	1	NA	NA	NA	NA
SPAC1786.03	0	-0.02	0.01	0.04	0.01	0.09	-0.05	NA	NA	NA	NA	NA	NA	NA
SPAC17A2.01	0	-0.17	0.04	-0.36	-0.24	-0.02	-0.46	NA	NA	NA	NA	NA	NA	NA
SPAC17A2.02c	0	0.05	0.02	-0.31	0.32	0.53	-0.24	NA	NA	NA	NA	NA	NA	NA
SPAC17A2.03c	0	0.15	0	-0.51	-0.14	-0.1	-0.11	NA	NA	NA	NA	NA	NA	NA
SPAC17A2.04c	0	-0.2	-0.37	-0.55	-0.34	-0.29	-0.41	NA	NA	1	NA	NA	NA	NA
SPAC17A2.05	0	-0.04	-0.7	-0.6	0.28	0.41	0.21	NA	NA	NA	NA	NA	NA	NA
SPAC17A2.06c	0	0.22	0.92	0.78	0.39	0.34	0.57	NA	NA	NA	NA	NA	NA	NA
SPAC17A2.07c	0	0.06	0.46	0.19	0.18	0.23	0.41	NA	NA	NA	NA	NA	NA	NA
SPAC17A2.08c	0	-0.17	-1.01	-0.87	-0.2	-0.24	-0.34	NA	NA	NA	NA	NA	NA	NA
SPAC17A2.09c	0	0.65	1.39	1.51	1.03	0.97	1.48	NA	NA	1	1	NA	1	NA
SPAC17A2.10c	0	0.43	0.45	0.94	0.74	1	1.32	NA	NA	NA	1	NA	NA	NA
SPAC17A2.12	0	0.36	0.22	0.2	0.21	-0.01	0.29	NA	NA	NA	NA	NA	NA	NA
SPAC17A2.13c	0	0.1	0.82	1.13	1.51	0.75	1.42	NA	NA	1	NA	NA	NA	NA
SPAC17A2.14	0	-0.02	0.17	-0.18	-0.4	-0.4	-0.53	NA	NA	1	NA	NA	NA	NA
SPAC17A5.01	0	-0.29	-1.36	-1.26	-0.48	-0.21	-0.3	NA	NA	1	NA	NA	NA	NA
SPAC17A5.02c	0	-0.01	-0.89	-0.42	0.07	0.08	0.25	NA	NA	NA	NA	NA	NA	NA
SPAC17A5.03	0	0.15	0	-0.26	0.06	0.06	-0.01	NA	1	1	NA	NA	NA	NA
SPAC17A5.04c	0	-0.09	-0.03	-0.3	-0.06	0.15	-0.03	NA	NA	NA	NA	NA	NA	NA
SPAC17A5.05c	0	-0.13	-0.12	-0.07	-0.15	0.1	-0.12	NA	NA	NA	NA	NA	NA	NA
SPAC17A5.06	0	0.1	0.18	0.16	0.16	0.09	0.28	NA	NA	NA	NA	NA	NA	NA
SPAC17A5.07c	0	-0.04	-0.14	-0.21	-0.06	0.02	0.02	NA	NA	NA	NA	NA	NA	NA
SPAC17A5.08	0	-0.13	-0.17	-0.11	0.05	-0.02	0.05	NA	NA	NA	NA	NA	NA	NA
SPAC17A5.09c	0	0.34	0.97	0.59	0.36	0.4	0.34	NA	NA	NA	NA	NA	NA	NA
SPAC17A5.10	0	0.7	0.86	0.6	0.42	0.29	0.4	NA	NA	NA	NA	NA	NA	NA
SPAC17A5.11	0	-0.09	0.06	0.54	0.17	-0.02	0.57	NA	NA	NA	NA	NA	NA	NA
SPAC17A5.12	0	-0.4	-0.3	-0.23	-0.01	0.01	0.16	NA	NA	NA	NA	NA	NA	NA
SPAC17A5.13	0	-0.12	-0.77	-0.88	-0.28	-0.13	-0.24	NA	NA	NA	NA	NA	NA	NA
SPAC17A5.14	0	0.08	0.19	0.09	0.12	-0.02	0.2	NA	NA	NA	NA	NA	NA	NA
SPAC17A5.15c	0	-0.05	-0.84	-1.18	-0.47	-0.34	-0.75	NA	NA	1	NA	NA	NA	NA
SPAC17A5.16	0	0.1	0.51	0.13	0.16	0.15	0.03	NA	NA	NA	NA	NA	NA	NA
SPAC17A5.18c	0	-0.26	-0.73	-0.64	-0.25	0	-0.09	NA	NA	NA	NA	NA	NA	NA
SPAC17C9.01c	0	0.38	0.21	-0.07	0.21	0.17	0.09	NA	NA	NA	NA	NA	NA	NA
SPAC17C9.02c	0	-0.13	-0.42	-0.41	-0.18	-0.04	-0.33	NA	NA	NA	NA	NA	NA	NA
SPAC17C9.03	0	0.1	-0.71	-0.6	0.08	0.03	0.22	NA	NA	1	NA	NA	1	NA
SPAC17C9.05c	0	-0.02	0.05	0.1	0.23	0.11	0.18	NA	NA	NA	NA	NA	NA	NA
SPAC17C9.06	0	0.26	0.95	1.14	0.9	0.36	0.68	1	NA	1	NA	NA	NA	NA
SPAC17C9.07	0	-0.02	-0.02	-0.08	0.06	0.16	-0.2	NA	NA	NA	NA	NA	NA	NA
SPAC17C9.08	0	-0.18	-0.49	0.28	0.61	0.23	0.19	NA	NA	1	NA	NA	NA	NA
SPAC17C9.09c	0	-0.24	-0.32	0.07	-0.02	-0.28	-0.33	NA	NA	NA	NA	NA	NA	NA
SPAC17C9.10	0	-0.03	-0.17	0.41	-0.26	-0.29	-0.37	NA	NA	1	NA	NA	NA	NA
SPAC17C9.11c	0	0.61	1.48	1.73	0.86	0.32	0.66	1	NA	1	NA	NA	NA	NA
SPAC17C9.12	0	0.3	1.15	1.33	0.73	0.54	0.71	1	NA	1	NA	NA	NA	NA
SPAC17C9.13c	0	0.1	-0.25	-0.15	0.07	0.13	0.23	NA	NA	NA	NA	NA	NA	NA
SPAC17C9.14	0	0.15	0	-0.07	0.1	0.25	0.16	NA	NA	NA	NA	NA	NA	NA
SPAC17C9.15c	0	0.01	-0.12	-0.17	-0.42	-0.1	-0.48	NA	NA	NA	NA	NA	NA	NA
SPAC17C9.16c	0	0.44	-0.47	0.2	0.23	0.36	1.84	1	NA	1	NA	NA	NA	NA
SPAC17D4.01	0	-0.27	-0.23	0.57	-0.01	-0.49	0.92	NA	NA	NA	NA	NA	NA	NA
SPAC17D4.02	0	-0.22	-0.49	-0.52	-0.08	-0.06	-0.42	NA	NA	1	NA	NA	NA	NA
SPAC17D4.03c	0	-0.36	-0.42	-0.31	0.01	0.08	0.15	NA	NA	NA	NA	NA	NA	NA
SPAC17D4.04	0	0.04	-1.03	-0.84	-0.49	-0.3	-0.71	NA	NA	1	NA	NA	1	NA
SPAC17G6.02c	0	0.46	-0.25	0.01	-0.22	-0.04	0.6	1	NA	1	NA	NA	NA	NA
SPAC17G6.03	0	0.12	0.94	1.3	0.57	0.14	0.15	1	NA	1	NA	NA	NA	NA
SPAC17G6.04c	0	0.05	0.53	0.53	0.57	0.36	0.37	NA	NA	NA	NA	NA	NA	NA
SPAC17G6.05c	0	0.13	0.74	0.59	0.43	0.26	0.31	NA	NA	NA	NA	NA	NA	NA
SPAC17G6.06	0	0	-0.29	-0.44	0.19	0.2	0.04	NA	NA	NA	NA	NA	NA	NA
SPAC17G6.07c	0	-0.25	-0.23	0.17	0.04	-0.05	-0.23	NA	NA	NA	NA	NA	NA	NA
SPAC17G6.08	0	0.08	0.21	0.18	0.14	0.05	0.02	NA	NA	NA	NA	NA	NA	NA
SPAC17G6.09	0	0.11	0.14	-0.09	0.02	0.2	0.05	NA	NA	NA	NA	NA	NA	NA
SPAC17G6.10	0	0.2	-0.11	-0.49	-0.23	0.01	-0.08	NA	NA	NA	NA	NA	NA	NA
SPAC17G6.11c	0	0.08	-0.32	-0.78	-0.64	-0.41	-0.34	NA	NA	1	NA	NA	NA	NA
SPAC17G6.12	0	0.39	0.61	0.48	0.45	0.19	0.4	NA	NA	1	NA	NA	NA	NA
SPAC17G6.13	0	1.35	1.24	0.51	0.28	0.05	-0.14	NA	NA	NA	NA	NA	NA	NA
SPAC17G6.14c	0	0.05	-0.18	-0.47	-0.34	-0.07	-0.5	NA	NA	NA	NA	NA	NA	NA
SPAC17G6.15c	0	-0.14	-0.67	-1.09	-0.98	-0.66	-0.97	NA	1	1	NA	NA	NA	NA
SPAC17G6.16c	0	0.27	0.65	0.89	0.21	0.02	-0.27	NA	NA	NA	NA	NA	NA	NA
SPAC17G6.17	0	-0.13	-0.03	-0.12	-0.06	-0.02	-0.28	NA	NA	NA	NA	NA	1	NA
SPAC17G8.01c	0	-0.29	-0.33	-0.6	-0.52	-0.55	-0.7	NA	NA	1	NA	NA	NA	NA
SPAC17G8.02	0	-0.04	0.02	-0.21	-0.17	-0.24	-0.43	NA	NA	NA	NA	NA	NA	NA
SPAC17G8.03c	0	0.11	0.41	0.7	-0.11	-0.03	-0.09	NA	NA	NA	NA	NA	NA	NA
SPAC17G8.04c	0	0.11	-0.05	0.09	0.21	0.1	0.13	NA	NA	NA	NA	NA	NA	NA
SPAC17G8.05	0	-0.19	-0.26	-0.3	-0.37	-0.26	-0.39	NA	NA	NA	NA	NA	NA	NA
SPAC17G8.06c	0	0.28	-0.38	-0.78	-1.21	-1.11	-0.28	NA	1	1	NA	NA	NA	NA
SPAC17G8.07	0	-0.19	0.07	-0.19	-0.34	-0.29	-0.17	NA	NA	NA	NA	NA	NA	NA
SPAC17G8.08c	0	-0.1	-1.1	-1.53	-1.08	-1.19	-0.96	NA	1	1	NA	NA	NA	NA
SPAC17G8.09	0	-0.2	-0.42	-0.19	-0.1	-0.06	0.21	NA	NA	NA	NA	NA	NA	NA
SPAC17G8.10c	0	0.58	1.06	1.07	0.81	0.42	1.02	NA	NA	1	NA	NA	NA	NA
SPAC17G8.11c	0	0.03	0.32	0.14	0.26	0.57	0.79	NA	NA	NA	NA	NA	NA	NA
SPAC17G8.12	0	0.11	0.32	0.37	0.26	0.23	0.73	NA	NA	NA	NA	NA	NA	NA
SPAC17G8.13c	0	0.02	0.23	0.63	0.1	0	1.34	NA	NA	NA	1	NA	NA	NA
SPAC17G8.14c	0	0.24	0.72	0.19	0.13	0.03	0.36	NA	NA	1	NA	NA	NA	NA
SPAC17G8.15	0	-0.3	-0.4	-0.26	-0.31	-0.16	-0.29	NA	NA	NA	NA	NA	NA	NA
SPAC17H9.01	0	-0.33	-0.14	0.03	0.39	0.14	0.11	NA	NA	NA	NA	NA	NA	NA
SPAC17H9.02	0	0.1	-0.25	-0.72	-0.41	-0.07	-0.13	NA	NA	1	NA	NA	1	NA
SPAC17H9.03c	0	NA	-0.11	0.08	0.04	0	-0.09	NA	NA	NA	NA	NA	NA	NA
SPAC17H9.04c	0	-0.28	-1.31	-1.33	-0.19	0.04	-0.48	NA	1	1	NA	NA	1	NA
SPAC17H9.05	0	-0.45	-1.62	-1.64	-0.41	-0.15	-0.7	NA	1	1	NA	NA	NA	NA
SPAC17H9.07	0	-0.22	-0.48	-0.56	-0.27	-0.23	0.08	NA	NA	NA	NA	NA	NA	NA
SPAC17H9.08	0	-0.31	-0.23	-0.12	0.18	0	-0.07	NA	NA	NA	NA	1	NA	NA
SPAC17H9.09c	0	0.01	0.13	-0.15	-0.11	-0.21	-0.01	NA	NA	NA	NA	1	NA	NA
SPAC17H9.10c	0	-0.1	-0.1	-0.24	-0.02	0.08	0.26	NA	NA	NA	NA	NA	NA	NA
SPAC17H9.11	0	-0.15	-0.64	-0.64	-0.23	-0.24	-0.7	NA	NA	1	NA	NA	NA	NA
SPAC17H9.12c	0	-0.09	-0.26	-0.59	-0.29	-0.32	-0.43	NA	NA	NA	NA	1	NA	NA
SPAC17H9.13c	0	-0.11	-0.63	-0.55	-0.88	-0.68	-0.66	NA	NA	1	NA	NA	1	NA
SPAC17H9.14c	0	0.11	0.19	0.19	0.11	0.08	0.21	NA	NA	NA	NA	NA	NA	NA
SPAC17H9.16	0	-0.33	-0.47	-0.54	-0.25	-0.14	-0.47	NA	NA	NA	NA	NA	NA	NA
SPAC17H9.17c	0	-0.16	-0.23	-0.34	-0.08	-0.27	-0.26	NA	NA	NA	NA	NA	NA	NA
SPAC17H9.19c	0	0.37	0.37	-0.76	-1.12	-0.56	-0.2	NA	NA	NA	NA	NA	NA	NA
SPAC17H9.20	0	-0.17	-0.48	-0.48	-0.46	-0.26	-0.2	NA	NA	NA	NA	NA	NA	NA
SPAC1805.01c	0	0.01	-0.1	-0.19	0.07	0.17	0.19	NA	NA	NA	NA	NA	NA	NA
SPAC1805.02c	0	-0.19	-0.74	-0.79	-0.22	-0.1	-0.36	NA	NA	NA	NA	NA	NA	NA
SPAC1805.03c	0	-0.13	-0.39	-0.35	-0.35	-0.15	-0.35	NA	NA	NA	NA	NA	NA	NA
SPAC1805.04	0	0.14	-0.25	-0.47	-0.06	0.04	-0.05	NA	NA	NA	NA	NA	NA	NA
SPAC1805.05	0	-0.06	-0.41	-0.51	-0.33	-0.03	-0.28	NA	NA	NA	NA	NA	NA	NA
SPAC1805.06c	0	0.06	-0.23	-0.44	-0.3	-0.26	-0.41	NA	NA	NA	NA	NA	NA	NA
SPAC1805.07c	0	-0.3	-0.42	-0.04	0.11	0.02	0.03	NA	NA	NA	NA	NA	NA	NA
SPAC1805.08	0	-0.2	-0.19	0	-0.18	-0.09	-0.15	NA	NA	NA	NA	NA	NA	NA
SPAC1805.09c	0	-0.12	-0.11	0.08	-0.1	-0.21	-0.5	NA	NA	NA	NA	NA	NA	NA
SPAC1805.10	0	-0.03	0.17	0.44	0.37	0.25	0.18	NA	NA	NA	NA	NA	NA	NA
SPAC1805.11c	0	0.02	0.08	-0.26	-0.28	-0.13	-0.51	NA	NA	1	NA	NA	NA	NA
SPAC1805.12c	0	-0.02	-0.26	-0.62	-0.07	-0.12	-0.16	NA	1	1	NA	NA	NA	NA
SPAC1805.13	0	-0.02	-0.22	-0.27	-0.21	-0.15	-0.41	NA	NA	1	NA	NA	NA	NA
SPAC1805.14	0	0	0.07	0.07	-0.1	-0.08	-0.05	NA	NA	NA	NA	NA	NA	NA
SPAC1805.15c	0	0.19	0.73	0.98	0.85	0.58	1.27	NA	NA	NA	NA	NA	NA	NA
SPAC1805.16c	0	-0.04	-0.07	-0.19	-0.02	-0.04	-0.46	NA	NA	NA	NA	NA	NA	NA
SPAC1805.17	0	0.13	-0.36	-0.66	0.01	0.07	-0.03	NA	NA	NA	NA	NA	NA	NA
SPAC1805.18	0	-0.26	-0.67	-0.8	-0.58	-0.44	-0.3	NA	NA	NA	NA	NA	NA	NA
SPAC1834.01	0	0.02	-0.73	-1.13	-0.17	-0.13	-0.45	NA	NA	1	NA	NA	1	NA
SPAC1834.02	0	0.2	0.07	0.36	0.21	0.06	0.33	NA	NA	NA	NA	NA	NA	NA
SPAC1834.03c	0	-0.08	0.71	0.77	-0.35	0.42	1.18	NA	NA	1	NA	NA	NA	NA
SPAC1834.04	0	-0.15	0.48	0.38	-0.66	0.43	0.96	NA	NA	NA	NA	NA	NA	NA
SPAC1834.05	0	0.08	-0.2	-0.3	-0.18	-0.24	-0.38	NA	NA	NA	NA	NA	NA	NA
SPAC1834.06c	0	0.26	0.29	0.21	-0.1	-0.08	-0.04	NA	NA	NA	NA	NA	NA	NA
SPAC1834.07	0	-0.62	-0.46	0.12	0.22	0.08	0.28	NA	NA	NA	NA	NA	NA	NA
SPAC1834.08	0	-0.01	0.37	0.31	0.31	0.19	0.4	NA	NA	NA	NA	NA	NA	NA
SPAC1834.09	0	0.24	1.25	1.29	0.66	0.27	0.47	NA	NA	1	NA	NA	NA	NA
SPAC1834.10c	0	-0.76	-0.59	-0.31	-0.11	-0.14	-0.19	NA	NA	NA	NA	NA	NA	NA
SPAC1834.11c	0	0.47	0.84	0.12	0.25	-0.04	0.44	NA	NA	NA	NA	NA	NA	NA
SPAC1851.02	0	-0.15	-0.51	-0.31	-0.06	0.16	-0.38	NA	NA	NA	NA	NA	NA	NA
SPAC1851.03	0	0.03	-0.11	-0.15	0.01	0.06	-0.05	NA	NA	NA	NA	NA	NA	NA
SPAC1851.04c	0	0.3	0.65	0.56	0.28	0.28	0.23	NA	NA	1	NA	NA	NA	NA
SPAC186.05c	0	-0.06	0.61	0.45	-0.07	0.61	0.08	NA	NA	NA	NA	NA	NA	NA
SPAC18B11.02c	0	-0.01	-0.58	-0.91	-0.96	-0.4	-0.98	NA	NA	NA	1	NA	1	NA
SPAC18B11.03c	0	0.06	-0.13	-0.01	0.16	0	1.01	NA	NA	NA	NA	NA	NA	NA
SPAC18B11.04	0	0.16	0.07	0.51	0.72	0.58	1.9	1	NA	1	NA	NA	NA	NA
SPAC18B11.05	0	0.06	0.33	0.6	0.26	0.07	0.45	NA	NA	NA	NA	NA	NA	NA
SPAC18B11.06	0	-0.19	-0.89	-1.02	-0.32	-0.22	-0.54	NA	1	1	NA	NA	1	NA
SPAC18B11.07c	0	0	0	0.24	-0.09	-0.07	-0.03	NA	NA	NA	NA	NA	NA	NA
SPAC18B11.08c	0	-0.15	-0.48	-0.38	-0.35	-0.03	-0.25	NA	NA	NA	NA	NA	NA	NA
SPAC18B11.09c	0	0.14	1.14	1.29	0.26	0.14	0.6	NA	NA	NA	NA	NA	NA	NA
SPAC18B11.10	0	-0.16	-0.08	-0.35	-0.29	-0.07	-0.22	NA	NA	NA	NA	NA	NA	NA
SPAC18B11.11	0	0	0.38	0.25	0.31	0.26	0.39	NA	NA	NA	NA	NA	NA	NA
SPAC18G6.01c	0	-0.13	0.35	0.77	0.58	0.47	1.26	NA	NA	NA	NA	NA	NA	NA
SPAC18G6.02c	0	-0.24	-0.68	-0.43	-0.02	-0.09	-0.01	NA	NA	1	NA	NA	1	NA
SPAC18G6.03	0	-0.16	-0.44	-0.34	-0.14	0.02	-0.2	NA	NA	NA	NA	NA	NA	NA
SPAC18G6.04c	0	-0.1	-0.8	-0.63	0.01	-0.02	-0.07	NA	NA	NA	NA	1	NA	NA
SPAC18G6.05c	0	0.25	0.26	0.19	-0.02	-0.06	-0.17	NA	NA	NA	NA	NA	NA	NA
SPAC18G6.06	0	0.09	0.16	-0.01	-0.29	-0.22	-0.41	NA	NA	1	NA	NA	1	NA
SPAC18G6.07c	0	-0.11	-1.32	-1.54	-0.69	-0.52	-0.99	NA	1	1	NA	NA	1	NA
SPAC18G6.10	0	0.27	0.26	0.07	0.24	0.42	0.62	NA	NA	NA	NA	NA	NA	NA
SPAC18G6.11c	0	0.03	0.05	-0.36	0.01	0.12	-0.17	NA	NA	1	NA	NA	NA	1
SPAC18G6.12c	0	-0.05	-0.01	-0.1	0.21	-0.23	0.29	NA	NA	NA	NA	NA	NA	NA
SPAC18G6.13	0	-0.14	-0.45	-0.06	-0.15	-0.18	0.25	NA	NA	NA	NA	1	NA	NA
SPAC18G6.14c	0	-0.21	-0.54	-0.99	-0.23	-0.1	-0.34	NA	1	1	NA	NA	NA	NA
SPAC18G6.15	0	-0.07	-0.06	0.27	-0.04	-0.15	-0.62	NA	NA	NA	NA	NA	NA	NA
SPAC1952.01	0	-0.1	-0.34	-0.46	-0.11	-0.08	-0.49	NA	NA	NA	NA	NA	NA	NA
SPAC1952.02	0	-0.42	-1.09	-1.13	-0.49	-0.1	-0.61	NA	NA	1	NA	NA	1	NA
SPAC1952.03	0	0.16	0.4	0.03	0.1	-0.08	-0.04	NA	NA	NA	NA	NA	NA	NA
SPAC1952.05	0	-0.27	-0.53	-0.55	-0.16	0.12	-0.09	NA	NA	NA	NA	NA	NA	NA
SPAC1952.06c	0	-0.33	-0.97	-1.01	-0.35	-0.24	-0.53	NA	NA	1	NA	NA	NA	NA
SPAC1952.07	0	-0.22	-1.01	-0.56	0.01	-0.1	-0.08	NA	NA	NA	NA	NA	NA	NA
SPAC1952.08c	0	-0.02	-0.02	-0.03	0.33	-0.12	-0.12	NA	NA	NA	NA	NA	NA	NA
SPAC1952.09c	0	0.15	0.97	2.21	1.66	0.67	2.37	1	NA	1	NA	1	NA	NA
SPAC1952.10c	0	-0.02	0.24	0.36	0.06	-0.11	-0.06	NA	NA	NA	NA	NA	NA	NA
SPAC1952.11c	0	-0.12	-0.6	-0.27	-0.11	-0.29	-0.3	NA	NA	NA	NA	NA	NA	NA
SPAC1952.12c	0	-0.13	-0.7	-0.56	0.12	-0.03	-0.28	NA	1	1	NA	NA	NA	NA
SPAC1952.13	0	0.46	1.51	1.89	1.33	1.02	0.99	1	NA	1	NA	NA	NA	NA
SPAC1952.14c	0	-0.11	0.19	0.21	-0.17	-0.05	-0.39	NA	NA	NA	NA	NA	NA	NA
SPAC1952.16	0	-0.09	-0.12	-0.17	0.26	0.02	-0.1	NA	NA	NA	NA	NA	NA	NA
SPAC1952.17c	0	0.06	0.66	0.57	0.77	0.29	0.49	NA	NA	1	NA	NA	NA	NA
SPAC19A8.01c	0	-0.12	0.17	0.24	0.33	0.17	0.72	NA	NA	NA	NA	NA	NA	NA
SPAC19A8.02	0	0.29	0.76	0.82	0	0.39	0.61	NA	NA	NA	NA	NA	NA	NA
SPAC19A8.03	0	0.15	0.23	0.65	0.36	0.23	0.46	NA	NA	1	NA	NA	NA	NA
SPAC19A8.04	0	0.08	-0.14	0.14	0.27	-0.11	0.63	NA	NA	NA	NA	NA	NA	NA
SPAC19A8.05c	0	0.57	1.62	1.18	0.88	0.32	1.33	1	NA	1	NA	NA	NA	NA
SPAC19A8.06	0	0.11	-0.07	-0.02	0.19	-0.05	-0.06	NA	NA	NA	NA	NA	NA	NA
SPAC19A8.07c	0	-0.59	-0.9	-1.03	-0.48	-0.21	-0.73	NA	1	1	NA	NA	1	NA
SPAC19A8.08	0	-0.17	-0.07	-0.07	0.24	0.32	0.49	NA	NA	NA	NA	NA	1	NA
SPAC19A8.09	0	0.41	0.88	0.75	0.3	0.11	-0.07	NA	NA	NA	NA	NA	NA	NA
SPAC19A8.10	0	0.27	0.67	0.65	0.18	0.05	0.28	NA	NA	NA	NA	NA	NA	NA
SPAC19A8.11c	0	0	-0.03	-0.2	-0.01	-0.07	-0.06	NA	NA	NA	NA	NA	NA	NA
SPAC19A8.12	0	0.18	0.38	0.12	0.12	0.03	0.33	NA	NA	NA	NA	NA	1	NA
SPAC19A8.13	0	0.1	0.2	-0.08	-0.08	0.05	-0.17	NA	NA	NA	NA	NA	1	NA
SPAC19A8.14	0	-0.04	0.43	0.42	-0.21	-0.07	-0.36	NA	NA	NA	NA	NA	NA	NA
SPAC19A8.15	0	0.07	-0.34	-0.34	-0.22	-0.27	-0.6	NA	NA	NA	NA	NA	NA	NA
SPAC19A8.16	0	1.99	6.4	7.08	4.31	2.04	3.71	NA	NA	NA	NA	NA	NA	NA
SPAC19B12.01	0	-0.43	-1.51	-1.08	-0.26	-0.27	-0.53	NA	1	1	NA	NA	NA	NA
SPAC19B12.02c	0	-0.49	-2.01	-1.46	0.3	0.26	0.94	NA	NA	1	NA	NA	NA	NA
SPAC19B12.03	0	0.21	-0.11	-0.17	-0.18	0	0.43	NA	NA	NA	NA	NA	NA	NA
SPAC19B12.04	0	-0.12	-0.75	-0.57	0.09	0.03	-0.08	NA	NA	1	NA	NA	NA	NA
SPAC19B12.05c	0	0.02	-0.15	-0.16	0.08	0.08	0.2	NA	NA	NA	NA	NA	NA	NA
SPAC19B12.06c	0	-0.15	-0.75	-0.52	-0.32	-0.2	-0.43	NA	NA	NA	NA	NA	NA	NA
SPAC19B12.07c	0	0.04	0.46	0.33	0.18	0.03	0.32	NA	NA	NA	NA	NA	NA	NA
SPAC19B12.08	0	1.1	2.02	1.8	1.01	0.68	1.49	1	NA	1	NA	NA	NA	NA
SPAC19B12.09	0	-0.2	-0.31	-0.34	-0.27	-0.16	-0.3	NA	NA	NA	NA	NA	NA	NA
SPAC19B12.10	0	0.35	1.28	1.14	0.32	0.09	0.4	NA	NA	NA	NA	NA	NA	NA
SPAC19B12.11c	0	-0.03	-0.76	-0.74	-0.12	-0.18	-0.28	NA	1	1	NA	NA	NA	NA
SPAC19B12.13	0	0.11	0.36	0.7	0.48	0.34	0.74	NA	NA	NA	NA	NA	NA	NA
SPAC19D5.01	0	4.47	6.01	3.32	0.69	0.48	0.63	1	NA	1	NA	NA	NA	NA
SPAC19D5.02c	0	0.16	-0.03	-0.09	0.1	-0.07	-0.12	NA	NA	NA	NA	NA	NA	NA
SPAC19D5.04	0	0.22	0.32	0.26	0.39	0.18	0.53	NA	NA	NA	NA	NA	NA	NA
SPAC19D5.05c	0	-0.12	-0.82	-0.9	-0.27	-0.17	-0.49	NA	1	1	NA	NA	1	NA
SPAC19D5.06c	0	-0.36	-0.79	-0.56	-0.2	-0.08	-0.41	NA	NA	NA	NA	NA	NA	NA
SPAC19D5.07	0	-0.13	-0.26	0.5	0.52	0.18	0.35	NA	NA	NA	NA	NA	NA	NA
SPAC19D5.09c	0	-0.4	-0.44	0.18	0.55	0.14	0.39	NA	NA	NA	NA	NA	NA	NA
SPAC19D5.11c	0	-0.22	-0.47	-0.47	-0.04	0.11	-0.14	NA	NA	NA	NA	NA	NA	NA
SPAC19E9.01c	0	0.41	0.92	0.94	0.39	0.3	0.27	NA	NA	NA	NA	NA	NA	NA
SPAC19E9.02	0	-0.06	-0.33	-0.22	0.23	0.3	0.32	NA	NA	NA	NA	NA	NA	NA
SPAC19E9.03	0	0.74	0.12	0.98	0.36	0.07	1.94	1	NA	1	NA	NA	NA	NA
SPAC19G12.01c	0	-0.1	-0.12	-0.41	0.21	-0.01	0.1	NA	NA	NA	NA	NA	NA	NA
SPAC19G12.02c	0	-0.08	0.25	0.12	0.05	-0.03	0.46	NA	NA	NA	NA	NA	NA	NA
SPAC19G12.03	0	-0.17	-0.33	0.42	0.78	0.24	0.61	NA	NA	1	NA	NA	NA	NA
SPAC19G12.04	0	-0.14	-0.09	0.36	0.11	-0.12	-0.1	NA	NA	NA	NA	NA	NA	NA
SPAC19G12.05	0	-0.3	-1.98	-1.98	-1.47	-1.12	-1.6	NA	1	1	NA	NA	NA	NA
SPAC19G12.06c	0	-0.08	0.3	0.23	-0.4	0.35	0.72	NA	NA	NA	NA	NA	NA	NA
SPAC19G12.07c	0	-0.22	-0.4	0.04	0.09	0.21	0.4	NA	NA	NA	NA	NA	1	NA
SPAC19G12.08	0	-0.04	0.09	0.6	0.13	0.92	1.73	NA	NA	1	NA	NA	NA	NA
SPAC19G12.09	0	0.8	2.86	3.45	3.17	1.53	2.81	1	NA	1	NA	NA	NA	NA
SPAC19G12.10c	0	0.47	1.22	1.46	1.11	0.91	2.63	NA	NA	NA	NA	NA	NA	NA
SPAC19G12.11	0	-0.11	0.1	0.48	0.42	0.1	0.56	NA	NA	NA	NA	NA	NA	NA
SPAC19G12.12	0	-0.32	-0.15	-0.19	-0.09	-0.02	0.22	NA	NA	NA	NA	NA	NA	NA
SPAC19G12.13c	0	-0.21	-0.22	-0.18	0.08	0.11	0.35	NA	NA	NA	1	NA	NA	NA
SPAC19G12.14	0	0.16	0.04	-0.06	0.02	0.12	0.11	NA	NA	NA	NA	NA	NA	NA
SPAC19G12.15c	0	0.36	1.37	1.98	1.13	0.57	-0.01	NA	NA	NA	NA	NA	NA	NA
SPAC19G12.16c	0	-0.31	-0.6	-1.98	-0.16	0.21	-0.21	NA	NA	NA	NA	NA	NA	NA
SPAC19G12.17	0	-0.29	-0.41	-0.16	-0.29	-0.19	-0.3	NA	NA	NA	NA	NA	NA	NA
SPAC1A6.01c	0	0.06	0.13	0.13	0.15	0	-0.07	NA	NA	NA	NA	NA	NA	NA
SPAC1A6.02	0	-0.1	-0.6	-0.5	-0.36	-0.29	-0.69	NA	NA	NA	NA	NA	NA	NA
SPAC1A6.03c	0	0.36	0.77	0.96	-0.21	0.09	0.13	NA	NA	NA	NA	NA	NA	NA
SPAC1A6.04c	0	1.51	3.18	3.76	2.65	2.53	3.06	1	NA	1	NA	1	NA	NA
SPAC1A6.05c	0	0.02	0.29	0	-0.14	0.34	-0.09	NA	NA	NA	NA	NA	NA	NA
SPAC1A6.06c	0	0.35	1.09	1.08	NA	-0.18	-0.02	NA	NA	NA	NA	NA	NA	NA
SPAC1A6.07	0	0.9	1.7	0.64	0.07	0.21	0.19	NA	NA	NA	NA	NA	NA	NA
SPAC1A6.08c	0	0.59	0.45	-0.05	-0.09	-0.05	-0.25	NA	NA	NA	NA	NA	NA	NA
SPAC1A6.09c	0	-0.07	-0.77	-0.86	-0.3	0.06	-0.29	NA	NA	NA	NA	NA	NA	NA
SPAC1A6.10	0	-0.09	-0.47	-0.81	-0.59	-0.45	-0.79	NA	NA	1	NA	NA	NA	NA
SPAC1B1.01	0	0.18	0.32	0.43	0.19	0.31	0.45	NA	NA	NA	NA	NA	NA	1
SPAC1B1.02c	0	0.13	0.29	0.24	0.1	0	0.01	NA	NA	NA	NA	NA	NA	NA
SPAC1B1.03c	0	0.03	-0.58	-0.89	-0.38	-0.43	-0.65	NA	NA	1	NA	NA	NA	NA
SPAC1B1.04c	0	-0.16	-0.2	-0.19	-0.16	0.01	0.02	NA	NA	NA	NA	NA	NA	NA
SPAC1B2.02c	0	-0.01	0.08	-0.16	0.09	-0.06	0.07	NA	NA	NA	NA	NA	NA	NA
SPAC1B2.03c	0	0.13	-0.91	-0.96	-0.63	0.12	-0.66	NA	NA	1	NA	NA	NA	NA
SPAC1B2.04	0	-0.06	0.03	0.51	0.29	0.28	0.62	NA	NA	1	NA	NA	NA	NA
SPAC1B2.05	0	0.13	-0.17	-0.28	-0.05	0.1	0.1	NA	NA	NA	NA	NA	NA	NA
SPAC1B3.01c	0	-0.56	-1.43	-0.94	-0.14	-0.3	-0.44	NA	NA	1	1	NA	NA	NA
SPAC1B3.02c	0	-0.29	-0.11	-0.35	-0.54	-0.19	-0.47	NA	NA	NA	NA	NA	NA	NA
SPAC1B3.03c	0	-0.11	-1.43	-2.86	-0.79	-1.07	-1.9	NA	NA	1	NA	NA	NA	NA
SPAC1B3.04c	0	0.07	-0.15	0.31	0.63	0.51	0.76	NA	NA	1	NA	NA	NA	NA
SPAC1B3.05	0	-0.21	-0.17	-0.42	-0.21	-0.24	-0.33	NA	NA	NA	1	NA	NA	NA
SPAC1B3.06c	0	-0.05	-0.05	0.66	0.61	-0.06	0.93	NA	NA	1	NA	NA	NA	NA
SPAC1B3.07c	0	-0.4	-0.21	0.02	0.37	0.22	0.43	NA	NA	NA	NA	NA	NA	NA
SPAC1B3.08	0	0.16	0.89	0.96	0.51	0.41	0.39	NA	NA	1	NA	NA	NA	NA
SPAC1B3.09c	0	-0.15	0.07	0.14	-0.1	0.03	-0.12	NA	NA	NA	NA	NA	NA	NA
SPAC1B3.10c	0	-0.23	0.48	0.2	0.1	0.14	0.2	NA	NA	NA	NA	NA	NA	NA
SPAC1B3.11c	0	0.61	1.2	0.92	0.27	-0.11	-0.05	NA	NA	NA	NA	NA	NA	NA
SPAC1B3.12c	0	-0.33	-1.15	-1.24	-0.82	-0.63	-0.89	NA	1	1	NA	NA	NA	NA
SPAC1B3.13	0	0.21	-0.31	-0.71	-0.38	-0.28	-0.68	NA	1	1	NA	NA	1	NA
SPAC1B3.14	0	-0.19	-0.86	-0.86	-0.42	-0.14	-0.48	NA	NA	NA	NA	NA	NA	NA
SPAC1B3.15c	0	-0.02	-0.34	-0.07	0.01	-0.39	-0.36	NA	NA	NA	NA	NA	NA	NA
SPAC1B3.16c	0	0.12	-0.29	0.52	-0.04	-0.07	-0.46	NA	1	1	NA	NA	NA	NA
SPAC1B3.17	0	0.09	0.08	-0.24	-0.18	-0.11	-0.49	NA	1	1	NA	NA	NA	NA
SPAC1B3.18c	0	-0.04	0.38	0.12	-0.06	-0.04	-0.14	NA	NA	NA	NA	NA	NA	NA
SPAC1B3.20	0	-0.1	0.7	1.3	0.72	0.42	0.54	NA	NA	NA	NA	NA	NA	NA
SPAC1B3.21	0	0.15	1.27	1.38	0.34	0.49	0.4	NA	NA	NA	NA	NA	NA	NA
SPAC1B9.02c	0	0.25	0.98	0.94	0.27	0.19	0.5	NA	NA	1	1	NA	NA	NA
SPAC1B9.03c	0	-0.24	-1.09	-1.21	-0.55	-0.39	-0.57	NA	1	1	NA	NA	1	NA
SPAC1D4.01	0	-0.06	0	0.08	0.09	-0.05	0.25	NA	NA	NA	NA	NA	NA	NA
SPAC1D4.02c	0	0.52	1.2	0.94	0.51	0.31	0.73	NA	NA	1	NA	NA	NA	NA
SPAC1D4.03c	0	0.2	1.05	1.2	0.68	0.41	0.88	1	NA	1	NA	NA	NA	NA
SPAC1D4.04	0	-0.01	-0.54	-0.54	0	-0.09	-0.44	NA	NA	NA	NA	NA	NA	NA
SPAC1D4.05c	0	-0.03	0.12	0.11	0	-0.04	-0.38	NA	NA	NA	NA	1	NA	NA
SPAC1D4.06c	0	-0.14	0.24	0.38	0.08	0.15	0.53	NA	NA	NA	NA	NA	NA	NA
SPAC1D4.08	0	-0.06	-0.35	-0.49	-0.37	-0.08	-0.18	NA	NA	NA	NA	NA	NA	NA
SPAC1D4.09c	0	-0.08	-0.14	-0.18	-0.08	-0.13	-0.23	NA	NA	NA	NA	NA	NA	NA
SPAC1D4.10	0	0.05	0.51	0.4	0	0.1	0.2	NA	NA	NA	NA	NA	NA	NA
SPAC1D4.11c	0	-0.38	0	0.97	1.05	0.58	1.18	1	NA	1	NA	NA	NA	NA
SPAC1D4.12	0	0.13	0.6	0.54	0.24	0.01	0.22	NA	NA	NA	NA	NA	NA	NA
SPAC1D4.13	0	-0.49	0.11	0.12	0.3	0.29	0.63	NA	NA	1	NA	NA	NA	NA
SPAC1D4.14	0	0.25	0.43	0.32	0.07	0.18	0.4	NA	NA	NA	NA	NA	NA	NA
SPAC1F12.02c	0	-0.01	-0.33	-0.52	0.01	0.04	-0.02	NA	1	1	NA	NA	NA	NA
SPAC1F12.04c	0	-0.36	-0.77	-1.01	-0.54	-0.41	-0.75	NA	NA	1	NA	NA	NA	NA
SPAC1F12.05	0	-0.41	-0.52	-0.24	-0.2	-0.11	0.02	NA	NA	NA	1	NA	NA	NA
SPAC1F12.06c	0	-0.25	-0.37	-0.09	-0.08	0.05	0.09	NA	NA	NA	NA	NA	NA	NA
SPAC1F12.07	0	-0.11	-0.83	-0.63	-0.56	-0.58	-0.68	NA	NA	1	NA	NA	NA	NA
SPAC1F12.08	0	-0.03	-0.45	-0.3	-0.14	-0.15	-0.19	NA	NA	NA	NA	NA	NA	NA
SPAC1F12.09	0	-0.09	-0.32	-0.03	0.19	0.04	0.01	NA	NA	NA	NA	NA	NA	NA
SPAC1F12.10c	0	0.05	-0.22	-0.82	-0.58	-0.63	-0.43	NA	NA	1	NA	NA	NA	NA
SPAC1F3.01	0	-0.16	-0.93	-0.67	0.18	0.09	-0.06	NA	NA	1	NA	NA	NA	NA
SPAC1F3.02c	0	0.35	1.15	1.01	0.68	0.45	0.9	NA	NA	1	NA	NA	NA	NA
SPAC1F3.03	0	0.32	0.99	0.77	0.64	0.35	0.56	NA	NA	1	NA	NA	NA	NA
SPAC1F3.04c	0	-0.07	0.31	0.6	0.13	-0.03	-0.04	NA	NA	NA	NA	NA	NA	NA
SPAC1F3.05	0	-0.01	-0.65	-0.67	-0.26	-0.21	0.14	NA	NA	NA	NA	NA	NA	NA
SPAC1F3.06c	0	0.05	-0.42	-0.22	0.14	0.16	0.12	NA	NA	NA	NA	NA	NA	NA
SPAC1F3.07c	0	0.1	-0.35	-0.89	-0.4	0.02	-0.5	NA	NA	NA	NA	NA	NA	NA
SPAC1F3.09	0	0.25	1.3	0.36	-0.23	0.18	-0.16	NA	NA	1	1	NA	NA	NA
SPAC1F3.10c	0	0.16	0.84	0.81	0.46	0.25	0.64	NA	NA	NA	NA	NA	NA	NA
SPAC1F5.02	0	0.2	0.32	0	0.32	0.22	0.5	NA	NA	NA	NA	NA	NA	NA
SPAC1F5.03c	0	0.07	-0.23	-0.35	0.02	0.22	-0.11	NA	NA	NA	NA	NA	NA	NA
SPAC1F5.04c	0	-0.18	-0.29	0.01	-0.03	0.01	0.25	NA	NA	NA	NA	NA	NA	NA
SPAC1F5.05c	0	-0.04	0	0.11	-0.99	-0.57	-0.3	NA	NA	NA	NA	NA	NA	NA
SPAC1F5.06	0	0.13	-0.15	-0.19	0.41	0.31	0.18	NA	NA	NA	NA	NA	NA	NA
SPAC1F5.07c	0	-0.08	-0.3	0.05	0.44	0.26	0.31	NA	NA	NA	NA	NA	NA	NA
SPAC1F5.08c	0	0.08	0.37	0.42	0.25	0.18	0.36	NA	NA	NA	NA	NA	NA	NA
SPAC1F5.09c	0	0.44	0.72	0.72	0.56	0.28	0.22	NA	NA	NA	NA	NA	NA	NA
SPAC1F5.10	0	-0.15	-0.81	-0.69	-0.28	-0.17	-0.34	NA	NA	1	NA	NA	NA	NA
SPAC1F5.11c	0	0.18	-0.29	-0.2	0.12	0.2	0.82	NA	NA	NA	NA	NA	NA	NA
SPAC1F7.01c	0	0.06	-0.29	-0.33	0.08	0.11	0.23	NA	NA	NA	NA	NA	NA	NA
SPAC1F7.02c	0	-0.08	-1.42	-1.47	-0.2	0.07	-0.59	NA	1	1	NA	NA	1	NA
SPAC1F7.03	0	0.1	0.74	0.9	0.4	0.44	1.13	NA	NA	1	NA	NA	NA	NA
SPAC1F7.04	0	-0.19	-0.21	0.16	0.03	0.11	0.71	NA	NA	NA	NA	NA	NA	NA
SPAC1F7.05	0	-0.13	0.11	-1.11	-0.42	-0.16	-0.28	NA	NA	NA	NA	NA	NA	NA
SPAC1F7.06	0	0.19	0.42	0.47	0.04	0.13	-0.35	NA	NA	NA	NA	NA	NA	NA
SPAC1F7.07c	0	-1.21	-4.04	-2.87	0.72	1.57	-2.59	NA	NA	NA	NA	NA	NA	NA
SPAC1F7.08	0	-0.96	-3.08	-2.29	0.76	1.75	-1.98	1	NA	1	NA	NA	NA	NA
SPAC1F7.09c	0	-0.11	-0.1	0.23	0.37	0.29	0.35	NA	NA	1	NA	NA	NA	NA
SPAC1F7.10	0	-0.3	-0.24	0.14	0.06	-0.28	-0.65	NA	NA	NA	NA	NA	NA	NA
SPAC1F7.11c	0	0.2	0.17	-0.05	-0.07	0.04	-0.21	NA	NA	NA	NA	NA	NA	1
SPAC1F7.12	0	0.15	0.69	1.28	0.85	0.38	0.45	1	NA	1	NA	NA	NA	NA
SPAC1F7.13c	0	0	-0.45	-0.95	-0.52	-0.25	-0.78	NA	1	1	NA	NA	1	NA
SPAC1F7.14c	0	-0.12	-0.37	-0.2	-0.19	-0.2	-0.27	NA	NA	NA	NA	NA	NA	NA
SPAC1F8.01	0	0.66	2.03	6.38	5.6	5.34	7.13	1	NA	1	NA	NA	NA	NA
SPAC1F8.02c	0	-0.03	0.47	0.77	0.16	2.47	0.59	NA	NA	NA	NA	NA	NA	NA
SPAC1F8.03c	0	-0.26	-0.36	-0.87	0.86	2.82	-1.64	NA	NA	NA	NA	NA	NA	NA
SPAC1F8.04c	0	-0.07	-0.68	0.69	0.19	0.59	1.38	NA	NA	NA	NA	NA	NA	NA
SPAC1F8.05	0	0.18	0.46	0.9	1.16	2.6	4.58	1	NA	1	NA	NA	NA	NA
SPAC1F8.06	0	-0.57	-1.09	-0.82	-0.68	-0.05	-0.74	NA	NA	NA	NA	NA	NA	NA
SPAC1F8.07c	0	-0.47	-2.55	-2.72	-2.13	-0.64	-2.73	NA	1	1	NA	NA	NA	NA
SPAC20G4.01	0	-0.16	-0.95	-0.98	-0.45	-0.52	-0.8	NA	NA	NA	NA	NA	NA	NA
SPAC20G4.02c	0	0.25	0.71	0.97	0.81	0.15	0.73	1	NA	1	NA	NA	NA	NA
SPAC20G4.04c	0	0.04	0.14	-0.12	-0.57	-0.29	-0.85	NA	NA	NA	NA	NA	NA	NA
SPAC20G4.05c	0	0.28	1.18	1.39	1.08	0.47	1.33	1	NA	1	NA	NA	NA	NA
SPAC20G4.06c	0	-0.03	-0.04	0.19	0.27	0.25	0.28	NA	NA	NA	NA	NA	NA	NA
SPAC20G4.07c	0	-0.04	-0.8	-1	-0.61	-0.19	-0.55	NA	NA	1	NA	NA	NA	NA
SPAC20G4.08	0	0.14	0.25	0.03	0.32	0.16	-0.02	NA	NA	NA	NA	NA	NA	NA
SPAC20G8.01	0	0.13	0.49	0.57	0.17	0.07	-0.01	NA	NA	NA	NA	NA	NA	NA
SPAC20G8.02	0	0.46	0.65	0.78	0.16	0.3	0.77	NA	NA	1	NA	NA	NA	NA
SPAC20G8.03	0	0.06	-0.26	0.37	1.54	1.11	2.17	1	NA	1	NA	NA	NA	NA
SPAC20G8.04c	0	-0.05	0.47	1.01	0.34	-0.28	0.74	NA	NA	NA	NA	NA	NA	NA
SPAC20G8.05c	0	-0.16	-1.51	-1.15	0.04	0.03	-0.19	NA	NA	NA	NA	NA	NA	NA
SPAC20G8.06	0	-0.06	-0.35	-0.27	0.2	0.16	0.29	NA	NA	NA	NA	NA	NA	NA
SPAC20G8.07c	0	-0.14	-0.82	-1.35	-0.84	-0.4	-0.56	NA	1	1	NA	NA	NA	NA
SPAC20G8.08c	0	-0.6	-1.1	-0.74	-0.37	-0.32	-0.47	NA	NA	1	NA	NA	NA	NA
SPAC20G8.09c	0	-0.25	-1.67	-1.44	-0.41	-0.16	-0.61	NA	1	1	NA	NA	NA	NA
SPAC20G8.10c	0	0.57	1.2	0.76	0.43	0.26	0.6	NA	NA	NA	NA	NA	NA	NA
SPAC20H4.01	0	-0.04	-0.49	-0.82	-0.31	-0.21	-0.4	NA	NA	1	NA	NA	1	NA
SPAC20H4.02	0	0.13	0.3	0.5	0.37	0.1	0.45	NA	NA	1	NA	NA	NA	NA
SPAC20H4.03c	0	-0.06	-0.3	-0.82	-0.49	-0.39	-0.51	NA	NA	NA	NA	NA	NA	NA
SPAC20H4.04	0	0.02	0.32	0.16	0.03	0.1	0.24	NA	NA	NA	NA	NA	NA	NA
SPAC20H4.05c	0	-0.33	-0.92	-0.69	-0.49	-0.41	-0.56	NA	NA	NA	NA	NA	NA	NA
SPAC20H4.06c	0	-0.19	0.21	0.17	0.14	0.1	0.22	NA	NA	NA	NA	NA	1	NA
SPAC20H4.07	0	0.1	0.35	0.12	-0.38	-0.16	-0.34	NA	NA	NA	NA	NA	NA	NA
SPAC20H4.08	0	0	-0.32	-0.43	-0.56	-0.43	-0.76	NA	NA	1	NA	NA	NA	NA
SPAC20H4.09	0	0.09	-0.11	0.02	0.19	0.19	0.23	NA	NA	NA	NA	NA	NA	NA
SPAC20H4.10	0	0.18	0.43	0.12	0.25	0.1	0.31	NA	NA	NA	NA	NA	NA	NA
SPAC20H4.11c	0	0.25	0.52	1.03	1.79	0.88	1.85	1	NA	1	NA	NA	NA	NA
SPAC212.01c	0	0.52	1.19	0.47	-0.11	0.14	0.18	NA	NA	NA	NA	NA	NA	NA
SPAC212.02	0	0.46	0.93	0.34	-0.36	0.01	1.39	NA	NA	NA	NA	NA	NA	NA
SPAC212.04c	0	0.72	1.33	0.39	-0.04	0.22	0.19	NA	NA	NA	NA	NA	NA	NA
SPAC212.06c	0	-0.02	-0.01	-0.05	-0.77	-0.55	-0.86	NA	NA	NA	NA	NA	NA	NA
SPAC21E11.03c	0	1.41	2.49	1.37	0.07	0.5	0.49	NA	NA	NA	NA	NA	1	1
SPAC21E11.04	0	-0.12	-0.08	0.15	0.05	-0.07	0.25	NA	NA	NA	NA	NA	NA	NA
SPAC21E11.05c	0	0	-0.17	-0.2	0.06	0.11	0.12	NA	NA	NA	NA	NA	NA	NA
SPAC21E11.06	0	0.01	-0.17	-0.47	-0.09	-0.06	-0.56	NA	NA	NA	NA	NA	1	NA
SPAC21E11.07	0	0.17	0.87	0.74	-0.12	-0.34	-0.52	NA	NA	NA	NA	NA	NA	NA
SPAC21E11.08	0	0.31	0.6	0.5	0.32	0.32	0.41	NA	NA	NA	NA	NA	NA	NA
SPAC222.03c	0	-0.04	-0.23	-0.16	-0.17	-0.07	-0.21	NA	NA	NA	NA	NA	NA	NA
SPAC222.04c	0	-0.17	-0.47	-0.46	-0.4	-0.26	-0.26	NA	NA	NA	NA	NA	NA	NA
SPAC222.05c	0	-0.07	0.51	0.34	0.22	0.11	0.26	NA	NA	NA	1	NA	NA	NA
SPAC222.06	0	-0.18	-1.15	-1.27	-0.63	-0.28	-0.68	NA	1	1	NA	NA	NA	NA
SPAC222.07c	0	-0.28	-1.37	-0.95	-0.29	-0.37	-0.51	NA	NA	NA	NA	NA	NA	NA
SPAC222.08c	0	-0.39	-1.15	-0.84	-0.88	-0.8	-0.83	NA	1	1	NA	NA	NA	NA
SPAC222.09	0	0.07	0.35	-0.24	0.33	0.44	0.08	NA	NA	NA	NA	NA	1	NA
SPAC222.10c	0	-0.21	-0.31	-0.21	-0.06	0.08	0.23	NA	NA	NA	NA	NA	NA	NA
SPAC222.11	0	-0.08	-0.89	-1.32	-0.41	0.24	1.27	NA	NA	NA	NA	NA	NA	NA
SPAC222.12c	0	0.15	0.71	1.35	0.95	0.7	1.78	1	NA	1	NA	NA	NA	NA
SPAC222.13c	0	0.08	0.45	0.21	0.42	0.45	0.67	NA	NA	1	NA	NA	NA	NA
SPAC222.14c	0	0.16	0.35	-0.02	0.45	0.07	0.27	NA	NA	NA	NA	NA	NA	NA
SPAC222.16c	0	-0.12	0.27	0.13	0.14	0.01	0.04	NA	NA	NA	NA	NA	NA	NA
SPAC222.17	0	-0.21	-0.32	0.24	0.16	-0.24	-0.5	NA	NA	NA	NA	NA	NA	NA
SPAC222.18	0	-0.29	-0.66	-0.41	-0.25	-0.19	0.08	NA	NA	NA	NA	NA	1	NA
SPAC222.19	0	0.26	0.71	0.35	-0.14	0	0.28	NA	NA	NA	NA	NA	NA	NA
SPAC227.01c	0	0.16	-0.16	-0.27	-0.03	0.1	-0.07	NA	NA	NA	NA	NA	NA	NA
SPAC227.02c	0	-0.12	-1.22	-1.47	-0.62	-0.31	-0.68	NA	1	1	NA	NA	NA	NA
SPAC227.03c	0	0.48	1.49	1.52	0.05	0.18	0.48	NA	NA	1	NA	NA	NA	NA
SPAC227.05	0	-0.19	-0.52	-0.86	-0.56	-0.47	-0.85	NA	NA	1	NA	NA	NA	NA
SPAC227.06	0	0.17	-0.05	-0.19	-0.09	0.02	0.49	NA	NA	NA	NA	NA	NA	NA
SPAC227.07c	0	0.2	-0.14	-0.28	0.04	0.02	0.09	NA	NA	NA	NA	NA	NA	NA
SPAC227.08c	0	0.1	0.48	0.51	0.05	0.04	0.35	NA	NA	NA	NA	NA	NA	NA
SPAC227.09	0	-0.1	-0.31	-0.65	-0.3	-0.19	-0.39	NA	NA	NA	NA	NA	NA	NA
SPAC227.10	0	0.02	-0.15	-0.17	-0.33	-0.03	-0.27	NA	NA	NA	NA	NA	NA	NA
SPAC227.11c	0	0.1	0.6	0.53	0.28	0.37	0.43	NA	NA	1	NA	NA	NA	NA
SPAC227.12	0	0.03	-0.26	-0.28	0.04	0.04	-0.11	NA	NA	NA	NA	NA	NA	NA
SPAC227.13c	0	0.08	0.53	0.52	1.03	0.98	0.81	NA	NA	1	NA	NA	NA	NA
SPAC227.14	0	0.22	0.76	1.33	1.23	0.68	0.76	1	NA	1	NA	NA	NA	NA
SPAC227.15	0	0.19	0.81	1.06	1.06	0.96	1.41	1	NA	1	NA	NA	NA	NA
SPAC227.16c	0	-0.25	-0.23	-0.01	-0.45	-0.57	-0.85	NA	NA	NA	NA	NA	NA	NA
SPAC227.17c	0	-0.44	-1.47	-1.1	-0.24	-0.27	-0.1	NA	NA	NA	NA	1	NA	NA
SPAC227.18	0	0.1	-0.4	-0.61	-0.5	-0.63	-0.97	NA	NA	1	NA	NA	NA	NA
SPAC227.19c	0	-0.45	-0.65	-1.02	-0.42	-0.03	-0.16	NA	NA	NA	NA	NA	NA	NA
SPAC22A12.01c	0	0.02	-0.04	-0.06	0.36	0.24	0.37	NA	NA	NA	NA	NA	NA	NA
SPAC22A12.03c	0	-0.03	0.09	0.14	0.08	-0.09	-0.24	NA	NA	NA	NA	NA	NA	NA
SPAC22A12.04c	0	0.04	-0.01	-0.24	-0.44	-0.25	-0.67	NA	1	1	NA	NA	NA	NA
SPAC22A12.05	0	-0.06	-0.96	-1.26	-0.53	-0.24	-0.91	NA	1	1	NA	NA	NA	NA
SPAC22A12.06c	0	0.03	-0.14	-0.65	-0.32	-0.05	-0.24	NA	NA	NA	NA	NA	NA	NA
SPAC22A12.07c	0	0.03	-0.26	0.13	0.54	0.23	0.27	NA	NA	NA	NA	NA	NA	NA
SPAC22A12.08c	0	0.05	0.31	0.42	0.21	0.08	0.26	NA	NA	1	NA	NA	NA	NA
SPAC22A12.09c	0	0.04	-0.13	-0.43	-0.24	-0.19	-0.27	NA	NA	NA	NA	NA	1	NA
SPAC22A12.10	0	-0.04	-0.42	-0.6	-0.85	-0.51	-0.64	NA	NA	1	NA	NA	NA	NA
SPAC22A12.11	0	0.74	3.35	3.02	1.66	1.53	2.66	1	NA	1	NA	NA	NA	NA
SPAC22A12.12c	0	0.14	0.43	0.15	0	0	-0.3	NA	NA	NA	NA	NA	1	NA
SPAC22A12.13	0	0.19	-0.06	-0.46	-0.41	-0.19	-0.54	NA	NA	NA	NA	NA	NA	NA
SPAC22A12.14c	0	-0.21	-0.79	-0.75	-0.32	-0.26	-0.58	NA	NA	NA	NA	NA	NA	NA
SPAC22A12.15c	0	0.55	0.56	-0.24	0.32	0.36	0.19	NA	NA	NA	NA	NA	NA	NA
SPAC22A12.16	0	0.04	-0.44	-0.88	-0.52	-0.41	-0.57	NA	1	1	NA	NA	NA	NA
SPAC22A12.17c	0	1	4.27	3.83	0.96	0.03	-0.53	NA	NA	NA	NA	NA	NA	NA
SPAC22E12.01	0	-0.22	-0.52	-0.52	-0.49	-0.41	-0.33	NA	NA	NA	NA	NA	NA	NA
SPAC22E12.02	0	0.09	0.2	0.29	0.58	0.26	0.24	NA	NA	NA	NA	NA	1	NA
SPAC22E12.03c	0	-0.05	0.91	0.97	0.54	0.21	0.53	NA	NA	NA	NA	NA	NA	NA
SPAC22E12.04	0	0.06	0.3	0.73	0.48	-0.1	0.05	NA	NA	NA	NA	NA	NA	NA
SPAC22E12.05c	0	0	0.46	0.07	-0.11	0.04	-0.2	NA	NA	NA	NA	NA	NA	NA
SPAC22E12.06c	0	-0.23	-0.49	-0.29	-0.11	0.03	0.1	NA	NA	NA	NA	NA	NA	NA
SPAC22E12.07	0	-0.08	-0.7	-0.99	-0.51	-0.43	-0.93	NA	NA	1	NA	NA	NA	NA
SPAC22E12.08	0	-0.07	-0.25	0.06	-0.21	-0.17	-0.2	NA	NA	NA	NA	NA	NA	1
SPAC22E12.09c	0	0.25	0.23	0.15	-0.06	0.19	0.92	NA	NA	1	NA	NA	NA	NA
SPAC22E12.10c	0	-0.07	-0.06	0.41	0.17	-0.01	0.24	NA	NA	NA	NA	NA	NA	NA
SPAC22E12.11c	0	0.14	0.48	0.29	-0.16	0.03	0.24	NA	NA	NA	NA	NA	NA	NA
SPAC22E12.13c	0	-0.03	-0.72	-1.08	-0.69	-0.29	-0.88	NA	1	1	NA	NA	NA	NA
SPAC22E12.14c	0	0.04	-0.37	-0.63	0.08	0.35	0.42	NA	NA	NA	NA	NA	NA	NA
SPAC22E12.16c	0	0.13	0.12	-0.27	0.11	0.1	0.06	NA	NA	NA	NA	NA	NA	NA
SPAC22E12.17c	0	-0.18	-0.42	-0.62	-0.01	0.13	-0.06	NA	NA	NA	NA	NA	NA	NA
SPAC22E12.18	0	-0.27	-0.92	-1.05	-0.07	0.02	0	NA	NA	1	NA	NA	NA	NA
SPAC22E12.19	0	-0.25	0.3	0.13	-0.1	0.16	0.19	NA	NA	NA	NA	NA	NA	NA
SPAC22F3.03c	0	-0.24	-0.22	0.11	-0.28	-0.25	-0.21	NA	NA	NA	NA	NA	NA	NA
SPAC22F3.06c	0	0.14	0.09	0.35	0.17	-0.04	0	NA	NA	NA	NA	NA	NA	NA
SPAC22F3.07c	0	0.03	0.24	0.73	0.28	0.11	0.41	NA	NA	NA	1	NA	NA	NA
SPAC22F3.08c	0	-0.09	-0.38	-0.6	0.08	0.11	-0.09	NA	1	1	NA	NA	NA	NA
SPAC22F3.09c	0	0.94	2.06	1.86	0.69	0.45	0.77	1	NA	1	NA	NA	NA	1
SPAC22F3.10c	0	0.02	-0.05	-0.5	-0.42	-0.55	-0.67	NA	NA	1	NA	NA	NA	NA
SPAC22F3.11c	0	-0.08	-0.17	-0.53	-0.09	-0.16	0	NA	NA	NA	NA	NA	NA	NA
SPAC22F3.12c	0	-0.5	-1.2	0.28	2.17	1.84	1.77	1	NA	1	NA	NA	NA	NA
SPAC22F3.13	0	0.13	0.42	0.62	0.26	0.17	0.31	NA	NA	NA	NA	NA	NA	NA
SPAC22F3.15	0	-0.17	-0.32	-0.15	-0.08	-0.11	-0.35	NA	NA	NA	NA	NA	NA	NA
SPAC22F8.02c	0	0.32	0.05	0.08	-0.14	0.55	0.45	NA	NA	1	NA	NA	NA	NA
SPAC22F8.04	0	0.45	-0.13	-0.04	0.19	0.41	0.73	NA	NA	1	NA	NA	NA	NA
SPAC22F8.05	0	2.21	4.43	2.87	0.54	0.78	0.75	1	NA	1	NA	NA	NA	NA
SPAC22F8.06	0	0.18	0.15	-0.03	0.21	-0.03	0.08	NA	NA	NA	NA	NA	NA	NA
SPAC22F8.07c	0	0.04	-0.2	-0.2	0.27	0.12	0.19	NA	NA	NA	NA	NA	NA	NA
SPAC22F8.08	0	0.14	0.2	0.17	0.29	0.13	0.16	NA	NA	NA	NA	NA	NA	NA
SPAC22F8.09	0	-0.36	-0.82	-0.83	-0.24	-0.21	-0.37	NA	1	1	NA	NA	NA	NA
SPAC22F8.10c	0	0.11	-0.17	-0.25	0.04	-0.06	-0.16	NA	NA	NA	NA	NA	1	NA
SPAC22F8.11	0	-0.08	0.49	0.31	0.2	0.18	0.24	NA	NA	NA	NA	NA	NA	NA
SPAC22F8.12c	0	-0.29	-0.23	-0.41	-0.25	-0.06	-0.07	NA	NA	NA	NA	NA	NA	NA
SPAC22G7.01c	0	0.04	0.23	0.08	0.34	0.2	0.06	NA	NA	NA	NA	NA	NA	NA
SPAC22G7.02	0	0.07	-0.31	-0.43	-0.17	-0.03	-0.15	NA	NA	NA	NA	NA	NA	NA
SPAC22G7.03	0	-0.24	-0.64	-0.41	-0.26	-0.46	-0.4	NA	NA	NA	NA	NA	NA	NA
SPAC22G7.04	0	0.06	0.16	-0.04	-0.25	-0.06	-0.24	NA	NA	NA	NA	NA	NA	NA
SPAC22G7.05	0	-0.29	-1.33	-1.2	-0.2	-0.03	-0.31	NA	1	1	NA	NA	NA	NA
SPAC22G7.06c	0	0.48	0.34	0.08	-0.13	0.07	-0.15	NA	1	1	NA	NA	NA	NA
SPAC22G7.07c	0	0.12	0.27	0.56	0.26	0.02	0.39	NA	NA	NA	1	NA	NA	NA
SPAC22G7.08	0	0.63	0.76	0.87	0.13	0.28	0.4	NA	NA	NA	NA	NA	NA	NA
SPAC22G7.09c	0	-0.33	-0.71	-0.92	-0.34	-0.26	-0.29	NA	NA	NA	NA	NA	NA	NA
SPAC22G7.10	0	-0.01	0.3	0.7	0.71	0.05	0.07	NA	NA	NA	NA	NA	NA	NA
SPAC22G7.11c	0	0.03	4.1	6.39	5.45	0.96	2.86	NA	NA	NA	NA	NA	NA	NA
SPAC22H10.02	0	0.81	1.33	1.01	0.3	0.07	0.19	NA	NA	NA	NA	NA	NA	NA
SPAC22H10.03c	0	0.22	0.35	0.04	0.2	0.28	0.23	NA	NA	NA	NA	NA	NA	NA
SPAC22H10.04	0	-0.06	0.2	0.16	-0.12	-0.12	-0.07	NA	NA	NA	NA	NA	NA	NA
SPAC22H10.05c	0	0.17	0.55	0.6	-0.05	-0.24	-0.35	NA	NA	NA	NA	NA	NA	NA
SPAC22H10.07	0	0.02	-0.39	-0.13	-0.05	0.07	0.66	NA	NA	1	NA	NA	NA	NA
SPAC22H10.08	0	-0.29	-0.34	-0.35	0.07	-0.14	-0.32	NA	NA	NA	NA	NA	NA	NA
SPAC22H10.09	0	-0.08	0.09	0.05	-0.33	-0.1	-0.13	NA	NA	NA	1	NA	NA	NA
SPAC22H10.10	0	-0.33	-0.2	-0.55	-0.2	-0.08	-0.16	NA	NA	NA	NA	NA	NA	NA
SPAC22H10.11c	0	0.44	0.36	-0.01	0.29	0.34	0.45	NA	NA	NA	NA	NA	NA	NA
SPAC22H10.12c	0	0.56	0.95	0.05	0.44	0.19	0.16	NA	NA	NA	NA	NA	NA	NA
SPAC22H10.13	0	1.06	5.07	6.23	4.45	1.42	3.91	NA	NA	NA	NA	NA	NA	NA
SPAC22H12.01c	0	0.62	1.44	1.95	1.03	0.03	0.28	NA	NA	NA	1	NA	NA	NA
SPAC22H12.02	0	0.08	-0.12	-0.14	-0.07	0.05	-0.13	NA	NA	NA	NA	NA	NA	NA
SPAC22H12.03	0	-0.16	-0.1	0.1	-0.2	-0.25	-0.05	NA	NA	NA	NA	NA	NA	NA
SPAC22H12.04c	0	0.03	0.2	-0.18	-0.14	-0.02	-0.07	NA	1	1	NA	NA	NA	NA
SPAC22H12.05c	0	0.27	0.85	1.09	0.81	0.28	0.74	NA	NA	1	NA	NA	NA	NA
SPAC23A1.02c	0	0.56	0.85	0.04	-0.25	-0.01	-0.29	NA	NA	NA	NA	NA	NA	NA
SPAC23A1.03	0	0.08	-1.21	-1.76	-0.76	-0.48	-1.11	NA	1	1	NA	NA	NA	NA
SPAC23A1.04c	0	-0.14	0.05	0.14	-0.03	-0.09	-0.22	NA	NA	NA	NA	NA	NA	NA
SPAC23A1.05	0	0.06	-0.08	-0.31	-0.07	0.13	0.06	NA	NA	NA	NA	NA	NA	NA
SPAC23A1.07	0	-0.41	-0.67	-0.81	-0.38	-0.15	-0.44	NA	1	1	NA	NA	NA	NA
SPAC23A1.08c	0	-0.02	0.13	-0.34	-0.17	0.02	-0.1	NA	NA	1	NA	NA	NA	NA
SPAC23A1.09	0	0.27	0.03	-0.35	0.08	0.03	-0.26	NA	NA	NA	NA	NA	1	NA
SPAC23A1.10	0	0.04	0.33	0.22	0.46	0.17	NA	NA	NA	1	NA	NA	1	NA
SPAC23A1.11	0	-0.08	-0.44	-1.1	-0.44	-0.24	-0.49	NA	1	1	NA	NA	NA	NA
SPAC23A1.12c	0	0.08	-0.2	-0.23	-0.34	-0.28	-0.71	NA	NA	1	NA	NA	1	NA
SPAC23A1.14c	0	0.54	1.51	0.84	0.34	0.15	0.4	NA	NA	1	NA	NA	NA	NA
SPAC23A1.15c	0	0.63	1.16	0.59	0.07	0.18	0.23	NA	NA	NA	NA	NA	NA	NA
SPAC23A1.16c	0	0.61	1.37	0.95	0.32	0.21	0.46	NA	NA	NA	NA	NA	NA	NA
SPAC23A1.17	0	0.2	0.79	0.94	0.53	0.33	0.72	NA	NA	1	NA	NA	NA	NA
SPAC23A1.18c	0	0.62	1.37	1	0.41	0.4	0.61	NA	NA	1	NA	NA	NA	NA
SPAC23A1.19c	0	-0.09	-0.29	-0.19	-0.05	0.17	0.08	NA	NA	NA	NA	NA	NA	NA
SPAC23A1.20	0	-0.08	-0.51	-0.35	-0.44	-0.34	-0.53	NA	NA	NA	NA	NA	NA	NA
SPAC23C11.01	0	-0.09	-0.03	-0.19	-0.15	0.15	0.12	NA	NA	NA	NA	NA	NA	NA
SPAC23C11.02c	0	-0.16	-0.48	-0.58	-0.23	-0.16	-0.27	NA	1	1	NA	NA	NA	NA
SPAC23C11.03	0	-0.16	-1.05	-0.94	0.02	-0.04	-0.24	NA	NA	1	NA	NA	NA	NA
SPAC23C11.04c	0	-0.1	-0.54	-0.05	0.36	0.24	0.24	NA	NA	NA	NA	NA	NA	NA
SPAC23C11.05	0	-0.09	-1.08	-1.35	-0.72	-0.32	-0.69	NA	1	1	NA	NA	NA	NA
SPAC23C11.06c	0	2.3	4.77	4.07	2.09	1.17	3.67	1	NA	1	NA	NA	NA	NA
SPAC23C11.08	0	0.47	1.34	1.28	0.21	0.38	0.92	NA	NA	NA	NA	1	NA	1
SPAC23C11.09	0	0.18	-0.15	-0.23	0.01	-0.14	-0.07	NA	NA	NA	NA	NA	1	NA
SPAC23C11.10	0	-0.31	-0.2	0.09	0.03	0.03	-0.18	NA	NA	NA	NA	NA	NA	NA
SPAC23C11.11	0	-0.02	0.02	-0.07	-0.17	0.07	-0.01	NA	NA	NA	NA	NA	NA	NA
SPAC23C11.12	0	-0.65	-0.75	-0.3	-0.08	-0.18	-0.11	NA	NA	NA	NA	NA	NA	NA
SPAC23C11.13c	0	-0.31	-1.36	-1.17	-0.45	-0.39	-0.79	NA	1	1	NA	NA	NA	NA
SPAC23C11.14	0	-0.23	-0.96	-1.03	-0.44	-0.11	-0.15	NA	NA	NA	NA	NA	NA	NA
SPAC23C11.15	0	0.09	0.25	0.07	0.02	-0.1	-0.05	NA	NA	NA	NA	NA	NA	NA
SPAC23C11.16	0	-0.01	-0.67	-0.42	0.39	0.22	0.68	NA	NA	NA	NA	NA	NA	NA
SPAC23C11.17	0	0.17	0.41	0.26	0.05	-0.07	0.32	NA	NA	NA	NA	NA	NA	NA
SPAC23C4.02	0	-0.32	-0.5	-0.31	0.02	0.2	-0.1	NA	NA	NA	NA	NA	NA	NA
SPAC23C4.03	0	-0.33	-0.47	-0.36	0.03	0.19	-0.05	NA	NA	NA	NA	NA	NA	NA
SPAC23C4.04c	0	0.02	-0.25	-0.27	-0.13	-0.03	0.05	NA	NA	NA	NA	NA	NA	NA
SPAC23C4.05c	0	0.85	1.96	0.87	0.01	0.41	0.41	NA	NA	1	NA	NA	NA	NA
SPAC23C4.06c	0	-0.03	-1.06	-0.92	0.15	-0.14	-1.13	NA	1	1	1	NA	NA	NA
SPAC23C4.08	0	0.34	0.66	0.19	-0.18	0.13	0.28	NA	NA	NA	NA	NA	NA	NA
SPAC23C4.09c	0	-0.02	-0.14	-0.49	-0.41	-0.21	-0.45	NA	NA	1	1	NA	NA	NA
SPAC23C4.10	0	0	0.17	0.09	-0.07	0	0	NA	NA	NA	NA	NA	NA	NA
SPAC23C4.11	0	-0.18	0.09	0.84	0.44	0.32	0.86	NA	NA	1	NA	NA	NA	NA
SPAC23C4.12	0	0.04	0.71	0.36	0.2	0.12	0.35	NA	NA	NA	1	NA	NA	NA
SPAC23C4.13	0	0.39	0.49	-0.01	0.3	0.21	0.38	NA	NA	NA	NA	NA	NA	NA
SPAC23C4.14	0	-0.13	-0.01	-0.5	-0.65	-0.52	-0.84	NA	NA	1	NA	NA	NA	NA
SPAC23C4.15	0	-0.31	-0.79	-0.99	-0.46	-0.32	-0.6	NA	1	1	NA	NA	NA	NA
SPAC23C4.16c	0	0.03	0.2	0.25	0.43	0.15	0.48	NA	NA	NA	NA	NA	NA	NA
SPAC23C4.17	0	-0.16	-1.26	-1.21	-0.45	-0.32	-0.66	NA	NA	1	NA	NA	1	NA
SPAC23C4.18c	0	0.07	0.08	0.11	-0.05	0.1	-0.24	NA	NA	NA	NA	NA	NA	NA
SPAC23C4.19	0	0.12	-0.11	0.23	0.5	0.26	0.31	NA	NA	1	NA	NA	NA	NA
SPAC23D3.01	0	-0.58	-0.52	-0.34	0.11	0.14	0.02	NA	NA	NA	NA	NA	NA	NA
SPAC23D3.02	0	-0.02	-0.13	-0.46	-0.16	-0.21	-0.58	NA	NA	1	NA	NA	NA	NA
SPAC23D3.03c	0	-0.1	0.12	0.21	0.02	0.01	0.23	NA	NA	NA	NA	NA	NA	NA
SPAC23D3.04c	0	0.09	-0.43	-0.06	-0.56	-0.42	-0.79	NA	NA	NA	NA	NA	NA	NA
SPAC23D3.06c	0	0.18	0.36	0.28	0.19	0.21	0.2	NA	NA	NA	NA	NA	NA	NA
SPAC23D3.07	0	0.05	0.07	-0.23	0.39	0.14	0.08	NA	NA	NA	NA	NA	NA	NA
SPAC23D3.08	0	0.05	0.02	-0.34	-0.46	-0.31	-0.67	NA	NA	NA	NA	NA	1	NA
SPAC23D3.09	0	-0.06	-0.36	-0.31	-0.13	-0.06	-0.29	NA	NA	NA	1	NA	NA	NA
SPAC23D3.10c	0	0.05	-0.04	0.14	0.22	0.28	0.52	NA	NA	1	NA	NA	NA	NA
SPAC23D3.11	0	0.18	1.22	1.38	1.18	0.58	0.88	NA	NA	NA	1	NA	NA	NA
SPAC23D3.12	0	-0.06	-1.24	2.63	3.34	1.49	2.06	NA	NA	1	NA	NA	NA	NA
SPAC23D3.13c	0	0.1	0.16	0.16	0.28	0.29	0.29	NA	NA	NA	NA	NA	NA	NA
SPAC23D3.14c	0	0.06	0.58	0.71	0.18	0.2	0.71	NA	NA	NA	NA	NA	NA	NA
SPAC23D3.16	0	-0.18	-0.24	-0.44	-0.4	-0.18	-0.15	NA	NA	NA	NA	NA	NA	NA
SPAC23D3.17	0	-0.36	0.04	1.34	1.78	0.69	1.27	NA	NA	NA	NA	NA	NA	NA
SPAC23E2.01	0	-0.03	-0.14	-0.11	-0.25	-0.64	-0.37	NA	NA	1	NA	NA	NA	1
SPAC23E2.02	0	0.1	0.54	0.55	0.24	0.21	0.42	NA	NA	NA	NA	NA	NA	NA
SPAC23E2.03c	0	0.83	0.66	2.59	2.57	2.22	3.35	1	NA	1	NA	NA	NA	NA
SPAC23G3.01	0	0.17	0.6	0.74	0.47	0.2	0.44	NA	NA	NA	NA	NA	1	NA
SPAC23G3.02c	0	0.17	0.48	0.37	-0.06	0.19	0.41	NA	NA	NA	NA	NA	NA	NA
SPAC23G3.03	0	0.93	1.6	0.24	-0.13	0.65	-0.13	NA	NA	1	NA	NA	NA	NA
SPAC23G3.04	0	0.26	-0.05	-0.61	-0.53	-0.43	-0.89	NA	NA	NA	NA	NA	NA	NA
SPAC23G3.05c	0	0.33	0.27	-0.45	-0.58	-0.4	-0.67	NA	NA	NA	NA	NA	NA	NA
SPAC23G3.06	0	0.01	-0.47	-0.95	-0.4	-0.15	-0.42	NA	NA	1	NA	NA	1	NA
SPAC23G3.07c	0	-0.01	0.03	0.25	0.29	0.15	1.44	NA	NA	NA	NA	NA	NA	NA
SPAC23G3.08c	0	0.16	0.24	0.04	0.16	0.08	0.28	NA	NA	NA	NA	NA	NA	NA
SPAC23G3.09	0	0.02	0.4	0.57	0.37	0.17	0.26	NA	NA	NA	NA	NA	NA	NA
SPAC23G3.10c	0	-0.09	-0.12	-0.23	-0.23	-0.1	-0.13	NA	NA	NA	NA	NA	NA	NA
SPAC23G3.11	0	0.12	0.19	-0.08	0.26	0.06	-0.02	NA	NA	NA	NA	NA	NA	NA
SPAC23G3.12c	0	0.07	-0.52	-0.6	-0.16	-0.15	-0.48	NA	NA	1	NA	NA	NA	NA
SPAC23H3.02c	0	0.13	0.34	0.26	0.06	-0.16	-0.08	NA	NA	NA	NA	NA	NA	NA
SPAC23H3.03c	0	0.07	0.37	0.45	-0.04	-0.08	0.1	NA	NA	NA	NA	NA	NA	NA
SPAC23H3.04	0	0.24	0.69	0.37	-0.06	0	0.55	NA	NA	NA	NA	NA	NA	NA
SPAC23H3.05c	0	-0.74	-0.53	-0.77	-0.3	-0.25	-0.21	NA	NA	NA	NA	NA	NA	NA
SPAC23H3.06	0	-0.07	-0.05	-0.25	-0.3	-0.17	-0.35	NA	NA	NA	NA	NA	NA	NA
SPAC23H3.07c	0	0.06	0.12	0.22	-0.11	-0.13	-0.35	NA	NA	NA	NA	NA	NA	NA
SPAC23H3.08c	0	0.1	0.54	0.45	-0.26	-0.28	-0.54	NA	NA	NA	NA	NA	NA	NA
SPAC23H3.09c	0	-0.11	-0.56	-0.59	-0.83	-0.77	-1.06	NA	1	1	NA	NA	NA	NA
SPAC23H3.10	0	0.09	-0.34	-0.49	-0.13	-0.14	-0.35	NA	NA	NA	NA	NA	NA	NA
SPAC23H3.12c	0	0.14	-0.36	-0.15	-0.31	-0.04	-0.06	NA	NA	NA	NA	NA	NA	NA
SPAC23H3.13c	0	0.83	0.55	0.56	0.74	0.95	0.71	NA	NA	1	NA	NA	NA	NA
SPAC23H3.14	0	0.14	0.53	0.93	0.23	0.08	0.25	NA	NA	NA	NA	NA	NA	NA
SPAC23H4.01c	0	0.15	0.39	0.5	0.43	0.69	0.43	NA	NA	1	NA	NA	NA	NA
SPAC23H4.02	0	-0.06	0.47	0.56	-0.04	0.12	0.03	NA	NA	NA	NA	NA	NA	NA
SPAC23H4.03c	0	-0.18	-0.35	-0.42	0.05	0.18	-0.1	NA	NA	NA	NA	NA	NA	NA
SPAC23H4.04	0	-0.58	-0.68	-0.69	-0.41	-0.16	-0.49	NA	1	1	NA	NA	1	NA
SPAC23H4.06	0	-1.01	-3.13	-2.53	-2.35	-1.82	-1.66	NA	1	1	NA	NA	NA	NA
SPAC23H4.07c	0	-0.21	-0.39	-0.33	-0.14	-0.1	-0.21	NA	NA	NA	NA	NA	NA	NA
SPAC23H4.08	0	0.04	-0.33	-0.32	-0.06	-0.05	-0.16	NA	NA	NA	NA	NA	NA	NA
SPAC23H4.09	0	-0.06	-0.37	-0.71	-0.32	-0.16	-0.57	NA	NA	1	NA	NA	NA	NA
SPAC23H4.10c	0	-0.15	-0.45	-0.51	-0.45	-0.41	-0.52	NA	NA	NA	NA	NA	NA	NA
SPAC23H4.11c	0	-0.36	-0.33	-0.34	-0.26	-0.24	-0.36	NA	NA	NA	NA	NA	NA	NA
SPAC23H4.12	0	-0.15	-0.11	-0.27	-0.29	-0.17	-0.35	NA	NA	NA	NA	NA	NA	NA
SPAC23H4.13c	0	-0.25	-0.16	-0.32	-0.06	-0.33	0.16	NA	NA	NA	NA	NA	NA	NA
SPAC23H4.14	0	0.33	0.9	0.72	0.36	0.24	0.35	NA	NA	NA	NA	NA	NA	NA
SPAC23H4.15	0	-0.27	-1.05	-1.18	-0.54	-0.32	-0.72	NA	1	1	NA	NA	NA	NA
SPAC23H4.16c	0	0.15	0.52	-0.1	-0.2	-0.05	-0.49	NA	NA	NA	NA	NA	NA	NA
SPAC23H4.17c	0	0.48	0.67	0.29	-0.04	-0.22	-0.53	NA	NA	NA	NA	NA	NA	NA
SPAC23H4.18c	0	-0.03	0.02	0.41	0.25	0.08	-0.03	NA	NA	NA	NA	NA	NA	NA
SPAC23H4.21	0	-0.3	-0.31	0.06	0.16	0.03	0.3	NA	NA	NA	NA	NA	NA	NA
SPAC24B11.05	0	0.13	1.11	1.12	0.03	-0.2	0.34	NA	NA	NA	NA	NA	NA	NA
SPAC24B11.06c	0	0.18	0.47	-0.23	-0.02	-0.02	-0.18	NA	NA	NA	NA	NA	NA	NA
SPAC24B11.07c	0	-0.18	-0.28	-0.34	-0.03	0.3	0.35	NA	NA	NA	NA	NA	NA	NA
SPAC24B11.08c	0	-0.05	-0.23	0.03	-0.09	0.14	0.32	NA	NA	1	NA	NA	NA	NA
SPAC24B11.09	0	0.2	0.45	0.7	-0.34	-0.27	-0.05	NA	NA	NA	NA	NA	NA	NA
SPAC24B11.10c	0	0.03	0.16	0.24	-0.04	0.1	0.13	NA	NA	NA	NA	NA	NA	NA
SPAC24B11.11c	0	0.31	-0.12	0.07	0.46	0.38	0.11	NA	NA	1	NA	NA	NA	NA
SPAC24B11.12c	0	0.34	1.17	0.95	0.46	0.55	1.07	NA	NA	1	NA	NA	NA	NA
SPAC24B11.13	0	-0.03	0.17	0.84	-0.21	-0.29	-0.09	NA	NA	NA	NA	NA	NA	NA
SPAC24C9.02c	0	-0.05	0.04	0.55	0.15	-0.03	0.31	NA	NA	NA	NA	NA	NA	NA
SPAC24C9.03	0	-0.11	-0.62	-0.95	-0.6	-0.36	-0.83	NA	NA	1	NA	NA	NA	NA
SPAC24C9.04	0	-0.07	-0.11	-0.05	0.04	-0.04	0.07	NA	NA	NA	NA	NA	NA	NA
SPAC24C9.05c	0	-0.12	-0.36	-0.15	0.21	-0.05	0.15	NA	NA	NA	NA	NA	NA	NA
SPAC24C9.06c	0	0.36	2.06	3.13	2.09	-0.05	2.41	1	NA	1	NA	NA	NA	NA
SPAC24C9.07c	0	0.22	0.86	0.57	0.11	0.11	0.43	NA	NA	1	NA	NA	NA	NA
SPAC24C9.08	0	0.13	0.37	0.73	0.42	0	0.55	NA	NA	1	NA	NA	NA	NA
SPAC24C9.09	0	0.22	0.86	0.53	-0.11	-0.07	0.04	NA	NA	NA	NA	NA	NA	NA
SPAC24C9.10c	0	0.29	0.77	0.65	0.12	0.25	0.23	NA	NA	NA	NA	NA	1	NA
SPAC24C9.11	0	0.01	-0.44	-0.55	-0.09	-0.07	-0.05	NA	NA	NA	NA	NA	1	NA
SPAC24C9.12c	0	0.16	-0.52	-0.86	0.09	0.04	0.49	NA	NA	NA	NA	NA	NA	NA
SPAC24C9.13c	0	0.11	0.3	0.17	-0.03	-0.14	0.15	NA	NA	NA	NA	NA	NA	NA
SPAC24C9.14	0	0.5	1.36	1.38	0.58	0.26	0.62	NA	NA	1	NA	NA	NA	NA
SPAC24C9.16c	0	0.25	0.28	0.15	0.08	0.16	0.16	NA	NA	NA	NA	NA	NA	NA
SPAC24H6.01c	0	0.09	0.27	0.52	0.92	0.52	0.18	NA	NA	NA	NA	NA	NA	NA
SPAC24H6.02c	0	-0.32	0.37	0.19	-0.31	-0.16	-0.21	NA	NA	NA	NA	NA	NA	NA
SPAC24H6.03	0	0.12	0.28	0.28	0.34	0.23	0.35	NA	NA	NA	1	NA	NA	NA
SPAC24H6.04	0	0.03	0.36	0.66	0.22	0.26	0.59	NA	NA	1	NA	NA	NA	NA
SPAC24H6.05	0	-0.16	-0.82	-0.77	0.16	0.39	0.73	NA	NA	1	NA	NA	NA	NA
SPAC24H6.06	0	0.43	0.66	0.39	0.05	0.06	0.38	NA	NA	NA	NA	NA	NA	NA
SPAC24H6.07	0	0.01	-0.51	-1.01	-0.31	-0.01	-0.42	NA	NA	1	NA	NA	1	NA
SPAC24H6.08	0	0.32	-0.01	-0.49	-0.23	-0.33	-0.14	NA	NA	NA	NA	NA	NA	NA
SPAC24H6.09	0	0.27	0.77	0.39	0.2	0.23	0.48	NA	NA	NA	NA	NA	NA	NA
SPAC24H6.10c	0	0.2	0.18	0.21	-0.35	-0.36	-0.63	NA	1	1	NA	NA	NA	NA
SPAC24H6.11c	0	0.1	0.04	0.75	-0.4	-0.34	-0.29	NA	NA	NA	NA	NA	NA	NA
SPAC24H6.12c	0	0.13	0.75	0.29	-0.48	-0.2	-0.1	NA	NA	NA	NA	NA	NA	NA
SPAC24H6.13	0	-0.06	-0.37	-0.14	0.04	0.04	0.24	NA	NA	1	NA	NA	NA	NA
SPAC25A8.01c	0	0.5	0.93	0.11	0.06	0.08	0.15	NA	NA	NA	NA	NA	NA	NA
SPAC25A8.02	0	0.41	0.93	1.09	0.55	0.41	0.78	NA	NA	1	NA	NA	NA	NA
SPAC25A8.03c	0	0.1	0.53	0.4	-0.34	-0.29	-0.22	NA	NA	NA	NA	NA	NA	NA
SPAC25B8.01	0	-0.08	-0.23	-0.38	-0.09	0.23	0.26	NA	NA	NA	NA	NA	NA	NA
SPAC25B8.02	0	0.28	0.9	0.21	-0.72	-0.06	-0.05	NA	NA	NA	NA	NA	NA	NA
SPAC25B8.03	0	0.67	0.38	0.09	0.17	0.8	0.95	NA	NA	1	NA	NA	NA	NA
SPAC25B8.04c	0	0.16	0.49	0.6	0.42	0.28	0.2	NA	NA	1	NA	NA	NA	NA
SPAC25B8.05	0	-0.28	-1.19	-0.86	-0.13	-0.11	-0.45	NA	NA	1	1	NA	1	NA
SPAC25B8.06c	0	-0.41	-0.39	0.3	0.35	0.26	0.1	NA	NA	NA	NA	NA	NA	NA
SPAC25B8.07c	0	-0.1	0	0.04	0.26	0.41	0.07	NA	NA	NA	NA	NA	NA	NA
SPAC25B8.08	0	0.71	1.7	1.22	0.79	0.78	0.85	NA	NA	1	NA	NA	NA	NA
SPAC25B8.09	0	0.12	0.32	0.4	0.23	-0.15	0.61	NA	NA	NA	NA	NA	NA	NA
SPAC25B8.10	0	-0.09	-0.06	0.46	0.57	0.01	0.26	NA	NA	1	NA	NA	NA	NA
SPAC25B8.11	0	-0.03	0.13	0.23	0.28	0.26	0.59	NA	NA	1	NA	NA	NA	1
SPAC25B8.12c	0	0.01	0.15	-0.68	-1.23	-0.78	-2.7	NA	1	1	NA	NA	NA	NA
SPAC25B8.13c	0	-1.29	-2.19	1.16	-1.94	-1.5	1.11	NA	NA	NA	NA	NA	NA	NA
SPAC25B8.14	0	-0.72	-1.03	-0.52	0.08	0.04	0.07	NA	NA	NA	NA	NA	NA	NA
SPAC25B8.15c	0	-0.55	-1.38	-1.06	-0.46	-0.47	-1.02	NA	NA	NA	NA	NA	NA	NA
SPAC25B8.16	0	-0.45	-0.88	-0.84	-0.35	-0.14	-0.3	NA	NA	NA	NA	NA	1	NA
SPAC25B8.17	0	-0.09	-0.24	-0.52	-0.46	-0.26	-0.7	NA	NA	NA	NA	NA	NA	NA
SPAC25B8.18	0	0.62	1.63	2.19	0.99	0.44	0.81	NA	NA	NA	NA	NA	NA	NA
SPAC25B8.19c	0	0.36	1.19	0.64	0.2	0.37	0.26	NA	NA	NA	NA	NA	NA	1
SPAC25G10.01	0	0.08	0.57	0.44	0.62	0.3	0.43	NA	NA	1	NA	NA	1	NA
SPAC25G10.02	0	-0.13	-0.09	0.04	-0.05	-0.3	-0.54	NA	NA	NA	NA	NA	NA	NA
SPAC25G10.03	0	0	0.05	0.29	0.1	0.1	0.65	NA	NA	NA	NA	NA	NA	1
SPAC25G10.04c	0	-0.02	-0.14	-0.26	-0.05	-0.2	1.8	NA	NA	NA	NA	NA	NA	NA
SPAC25G10.05c	0	0.08	-1.08	-1.58	-1.05	-0.5	-1.3	NA	1	1	NA	NA	NA	NA
SPAC25G10.06	0	0.08	-0.19	-0.39	-0.13	-0.02	-0.18	NA	1	1	NA	NA	NA	NA
SPAC25G10.07c	0	-0.01	-0.18	0.1	0.34	0.13	0.3	NA	NA	NA	NA	NA	NA	NA
SPAC25G10.08	0	0.12	-0.17	-0.16	-0.05	-0.09	-0.28	NA	NA	1	NA	NA	1	NA
SPAC25G10.09c	0	0.09	-0.15	0.46	0.28	0.27	0.34	NA	NA	1	NA	NA	NA	NA
SPAC25H1.02	0	1.28	1.82	0.78	-1.19	-0.26	-0.53	NA	NA	NA	NA	NA	NA	NA
SPAC25H1.03	0	0.73	1.76	0.97	-0.1	0.1	0.21	NA	NA	NA	NA	NA	NA	NA
SPAC25H1.04	0	0.67	1.7	0.8	-0.38	-0.13	0.14	NA	NA	NA	NA	NA	NA	NA
SPAC25H1.05	0	0.09	-0.53	-0.55	0	0.15	-0.19	NA	NA	NA	NA	NA	NA	NA
SPAC25H1.06	0	-0.07	-0.3	-0.4	-0.29	-0.3	-0.41	NA	NA	NA	NA	NA	NA	NA
SPAC25H1.07	0	0.06	-0.61	-0.83	-0.17	-0.02	-0.34	NA	NA	NA	NA	NA	NA	NA
SPAC25H1.08c	0	-0.1	-0.21	0.2	0.17	-0.31	-1.11	NA	1	1	NA	NA	NA	NA
SPAC25H1.10c	0	-0.15	0.19	0.6	0.22	0.2	0.41	NA	NA	1	NA	NA	NA	NA
SPAC26A3.01	0	0.05	0.6	0.57	0.23	0.5	1.12	NA	NA	NA	NA	NA	NA	NA
SPAC26A3.02	0	-0.33	-0.52	-0.38	-0.12	-0.04	-0.25	NA	NA	NA	NA	NA	NA	NA
SPAC26A3.03c	0	-0.33	-0.77	-0.64	-0.04	0.23	-0.44	NA	NA	NA	NA	NA	NA	NA
SPAC26A3.04	0	-0.14	-0.27	-0.65	-0.24	-0.17	-0.28	NA	1	1	NA	NA	NA	NA
SPAC26A3.05	0	0.36	0.4	0.42	0.43	0.36	0.51	NA	NA	NA	NA	NA	NA	NA
SPAC26A3.06	0	-0.25	-0.61	-0.52	0.09	0.13	-0.02	NA	NA	1	NA	NA	NA	NA
SPAC26A3.07c	0	0	-0.07	-0.4	-0.08	-0.08	-0.23	NA	NA	1	NA	NA	1	NA
SPAC26A3.08	0	0.07	0.3	-0.04	-0.2	-0.01	-0.45	NA	NA	NA	NA	NA	NA	NA
SPAC26A3.09c	0	-0.04	0.11	0.15	0.28	0.41	0.59	NA	NA	NA	NA	NA	NA	NA
SPAC26A3.10	0	0.17	0.45	0.65	0.45	0.47	0.69	NA	NA	NA	NA	NA	NA	NA
SPAC26A3.11	0	-0.11	-0.51	-0.47	0.35	0.06	0.09	NA	NA	NA	NA	NA	NA	NA
SPAC26A3.12c	0	0.05	0.05	0.07	0.33	0.29	0.22	NA	NA	NA	NA	NA	NA	NA
SPAC26A3.14c	0	-0.09	0.23	0.83	0.36	0.25	0.39	NA	NA	NA	1	NA	NA	NA
SPAC26A3.15c	0	-0.1	-0.35	-0.5	-0.04	0.06	-0.08	NA	NA	NA	NA	NA	NA	NA
SPAC26A3.16	0	0.09	0.14	-0.17	0.03	0.06	-0.01	NA	NA	NA	NA	NA	NA	NA
SPAC26A3.17c	0	0.04	-0.72	-1.01	-0.5	-0.28	-0.74	NA	1	1	NA	NA	NA	NA
SPAC26F1.01	0	0.34	0.57	0.58	0.32	0.31	0.78	NA	NA	1	NA	NA	NA	NA
SPAC26F1.02	0	-0.03	0.05	0.33	0.18	-0.11	-0.14	NA	NA	NA	NA	NA	NA	NA
SPAC26F1.03	0	0.13	0.08	0.12	0.06	-0.01	0.35	NA	NA	NA	NA	NA	NA	NA
SPAC26F1.04c	0	1.45	2.62	2.75	1.14	0.34	0.45	1	NA	1	NA	NA	NA	NA
SPAC26F1.06	0	-0.19	-1.07	-2.29	-0.79	-0.38	-1.4	NA	1	1	NA	NA	NA	NA
SPAC26F1.07	0	0.66	2.25	1.51	0.87	0.68	0.76	1	NA	1	NA	NA	NA	NA
SPAC26F1.08c	0	-0.11	0.14	0.14	0.08	0	-0.01	NA	NA	NA	NA	NA	NA	NA
SPAC26F1.09	0	0.12	0.25	0.05	0.05	-0.02	0.19	NA	NA	NA	NA	NA	NA	NA
SPAC26F1.10c	0	0.55	0.83	0.77	0.13	0.29	1.1	NA	NA	NA	NA	NA	NA	NA
SPAC26F1.12c	0	0.05	-0.68	-0.88	-0.38	-0.27	-0.53	NA	1	1	NA	NA	NA	NA
SPAC26F1.13c	0	0.15	0	0.09	-0.06	-0.25	-0.26	NA	NA	1	NA	NA	NA	NA
SPAC26F1.14c	0	0.93	3.41	3.73	2.63	-0.19	2.03	1	NA	1	NA	NA	NA	NA
SPAC26H5.02c	0	-0.23	-0.41	-0.14	0.05	-0.02	-0.05	NA	NA	NA	NA	NA	NA	NA
SPAC26H5.03	0	-0.22	-0.4	0.16	-0.06	0.06	-0.09	NA	NA	NA	NA	NA	NA	NA
SPAC26H5.04	0	0.64	1.78	1.36	0.7	0.45	0.83	1	NA	1	NA	NA	NA	NA
SPAC26H5.05	0	0.28	0.79	0.47	0.26	0.26	0.45	NA	NA	NA	NA	NA	NA	NA
SPAC26H5.06	0	-0.36	-0.76	-0.28	-0.05	0.03	-0.24	NA	NA	NA	NA	NA	NA	NA
SPAC26H5.07c	0	-0.06	-0.01	0.28	-0.13	0.26	0.45	NA	NA	NA	NA	NA	NA	NA
SPAC26H5.08c	0	0.7	1.24	2.3	1.32	0.63	1.98	1	NA	1	NA	NA	NA	NA
SPAC26H5.09c	0	0.46	2.14	1.83	-0.47	-0.29	-1.39	NA	NA	NA	NA	NA	NA	NA
SPAC26H5.10c	0	-0.01	-0.19	-0.17	0.17	0.13	0.03	NA	1	1	NA	NA	1	NA
SPAC26H5.11	0	0.04	0.42	0.7	-0.03	0.2	0.37	NA	NA	NA	NA	NA	NA	NA
SPAC26H5.12	0	0.18	0.54	0.67	0.22	0.15	0.19	NA	NA	NA	NA	NA	NA	1
SPAC26H5.13c	0	-0.12	-0.48	-0.26	-0.18	-0.04	-0.13	NA	NA	NA	NA	NA	NA	NA
SPAC27D7.02c	0	-0.29	-0.08	-0.07	0.12	0.21	0.24	NA	NA	NA	NA	NA	NA	NA
SPAC27D7.03c	0	-0.8	-2.28	0.14	2.3	2.66	4.17	1	NA	1	NA	NA	1	NA
SPAC27D7.04	0	-0.25	-0.06	0.07	0.45	NA	-0.26	NA	NA	NA	1	NA	NA	NA
SPAC27D7.05c	0	-0.35	-0.22	-0.16	0.25	0.12	0.19	NA	NA	NA	NA	NA	NA	NA
SPAC27D7.06	0	-0.17	-0.36	-0.57	-0.31	-0.23	-0.26	NA	NA	NA	NA	NA	NA	NA
SPAC27D7.07c	0	-0.11	-0.47	-0.72	-0.6	-0.37	-0.85	NA	NA	1	NA	NA	1	NA
SPAC27D7.08c	0	-0.08	1.04	0.96	0.04	-0.16	0.06	NA	NA	NA	NA	NA	NA	NA
SPAC27D7.09c	0	1.2	2.96	3.29	1.91	0.86	-0.64	NA	NA	NA	NA	NA	NA	NA
SPAC27D7.11c	0	1.47	3.34	3.62	2.65	1.45	0.31	1	NA	1	NA	NA	NA	NA
SPAC27D7.12c	0	-0.02	0.64	0.72	0.61	0.76	0.81	NA	NA	NA	NA	NA	NA	NA
SPAC27D7.14c	0	0.28	0.57	0.39	0.02	0.13	0.2	NA	NA	NA	NA	NA	NA	NA
SPAC27E2.02	0	-0.3	-0.73	-0.69	-0.48	-0.43	-0.85	NA	NA	1	NA	NA	NA	NA
SPAC27E2.03c	0	0.13	-0.02	-0.26	-0.34	-0.38	-0.58	NA	1	1	NA	NA	NA	NA
SPAC27E2.05	0	-0.06	0.2	-0.03	-0.26	-0.25	0.72	NA	NA	NA	NA	NA	NA	NA
SPAC27E2.06c	0	0.3	1.05	1.28	0.41	0.22	0.22	NA	NA	NA	NA	NA	NA	NA
SPAC27E2.07	0	-0.46	-0.21	-0.07	-0.07	0.15	0.2	NA	NA	NA	NA	NA	NA	NA
SPAC27E2.09	0	0	0.12	0.34	0.39	0.39	0.68	NA	NA	NA	NA	NA	NA	NA
SPAC27E2.10c	0	-0.19	-0.65	-0.5	-0.31	-0.18	-0.4	NA	NA	NA	NA	NA	NA	NA
SPAC27E2.11c	0	-0.25	0.52	0.72	0.43	0.61	NA	NA	NA	NA	NA	NA	NA	NA
SPAC27E2.14	0	0.11	0.35	0.23	0	0.09	0.46	NA	NA	NA	NA	NA	NA	NA
SPAC27F1.02c	0	-0.36	-0.82	-0.77	0.23	0.18	0.28	NA	NA	NA	NA	NA	NA	NA
SPAC27F1.03c	0	0.02	0.09	0.09	0.6	0.23	0.76	NA	NA	NA	NA	NA	NA	NA
SPAC27F1.04c	0	-0.37	-0.69	-0.43	-0.03	-0.07	-0.23	NA	NA	NA	NA	NA	NA	NA
SPAC27F1.05c	0	-0.12	0.43	1.05	0.48	0.05	0.74	1	NA	1	1	NA	NA	NA
SPAC27F1.06c	0	-0.05	-0.85	-1.24	-0.86	-0.35	-0.75	NA	1	1	NA	NA	NA	NA
SPAC27F1.07	0	0.03	0.11	0.24	0.18	0.39	0.31	NA	NA	NA	NA	NA	NA	NA
SPAC27F1.08	0	0.31	0.63	0.49	0.2	0.08	-0.08	NA	NA	NA	NA	NA	NA	NA
SPAC27F1.09c	0	0.18	0.49	0.47	0.16	0.15	0.26	NA	NA	NA	NA	NA	1	NA
SPAC29A4.02c	0	-0.03	-0.83	-1.24	-1.04	-0.56	-1.07	NA	1	1	NA	NA	1	NA
SPAC29A4.03c	0	-0.22	-0.25	0.08	0.18	0.11	0.12	NA	NA	NA	NA	NA	NA	NA
SPAC29A4.04c	0	0.21	0.08	-0.02	-0.19	-0.02	-0.35	NA	NA	1	NA	NA	1	NA
SPAC29A4.05	0	-0.07	0.05	0.03	0.05	0.01	-0.13	NA	NA	NA	NA	NA	NA	NA
SPAC29A4.06c	0	0.16	0.47	0.44	0.22	0.16	0.25	NA	NA	NA	NA	NA	1	NA
SPAC29A4.07	0	-0.1	-0.28	-0.3	-0.07	-0.09	-0.18	NA	NA	NA	NA	NA	NA	NA
SPAC29A4.08c	0	0.09	0.08	-0.17	-0.17	-0.15	-0.42	NA	NA	NA	NA	NA	NA	NA
SPAC29A4.09	0	0.11	0.46	0.58	0.13	0.01	-0.14	NA	NA	NA	NA	NA	NA	NA
SPAC29A4.10	0	0.27	0.03	-0.25	-0.48	-0.06	-0.42	NA	NA	NA	NA	NA	NA	1
SPAC29A4.11	0	0.45	1.44	1.67	0.89	0.67	1.27	NA	NA	1	NA	NA	NA	NA
SPAC29A4.12c	0	1.53	5.5	5.43	2.46	1.16	3.72	1	NA	1	NA	NA	NA	NA
SPAC29A4.13	0	-0.09	-0.4	-0.37	-0.22	-0.12	-0.15	NA	NA	NA	NA	NA	NA	NA
SPAC29A4.14c	0	-0.17	0.17	0.26	-0.04	-0.05	-0.11	NA	NA	NA	NA	NA	NA	NA
SPAC29A4.15	0	0.06	-0.33	-0.46	-0.26	-0.19	-0.22	NA	NA	1	NA	NA	NA	NA
SPAC29A4.16	0	0.26	0.56	0.11	-0.32	0.26	0.28	NA	NA	NA	NA	NA	NA	NA
SPAC29A4.17c	0	1.19	2.54	1.95	0.68	0.7	1.26	1	NA	1	NA	NA	NA	NA
SPAC29A4.18	0	0.14	0.05	-0.36	-0.26	-0.22	-0.42	NA	NA	NA	1	NA	NA	NA
SPAC29A4.19c	0	0.04	0.67	0.53	0.22	0.34	0.29	NA	NA	NA	NA	NA	NA	NA
SPAC29A4.20	0	0.02	-0.04	-0.25	-0.09	-0.06	-0.24	NA	NA	1	NA	NA	NA	NA
SPAC29B12.01	0	-0.02	0.12	0.29	0.38	0.17	0.58	NA	NA	NA	NA	NA	NA	NA
SPAC29B12.02c	0	-0.24	-0.11	0.27	0.05	0.01	0.42	NA	NA	NA	NA	NA	NA	NA
SPAC29B12.03	0	0.46	1.22	1.78	0.74	1.11	1.64	NA	NA	1	NA	NA	NA	NA
SPAC29B12.04	0	-0.01	-0.77	-0.24	0.33	-0.18	-0.31	NA	NA	1	NA	NA	NA	NA
SPAC29B12.05c	0	0	-0.41	-0.14	-0.32	-0.24	-0.56	NA	NA	NA	NA	NA	NA	NA
SPAC29B12.06c	0	0.17	-0.17	-0.39	-0.1	0.16	-0.13	NA	NA	NA	NA	NA	1	NA
SPAC29B12.07	0	-0.02	-0.27	0.01	0.29	0.2	0.51	NA	NA	NA	NA	NA	NA	NA
SPAC29B12.08	0	-0.05	-0.7	0.29	0.39	0.48	0.33	NA	NA	1	NA	NA	NA	NA
SPAC29B12.10c	0	-0.39	-1.57	-0.41	-0.56	-0.59	-0.75	NA	1	1	NA	NA	NA	NA
SPAC29B12.11c	0	0.66	1.49	1.44	1.38	1.06	0.92	NA	NA	1	NA	NA	NA	NA
SPAC29B12.13	0	-0.14	0.67	1.69	0.9	0.16	1.47	NA	NA	NA	NA	NA	NA	NA
SPAC29B12.14c	0	-0.16	0.14	0.32	-0.21	-0.45	-0.03	NA	NA	NA	NA	NA	NA	NA
SPAC29E6.01	0	-0.24	0.52	0.92	0.35	0.25	0.7	NA	NA	NA	NA	NA	NA	NA
SPAC29E6.02	0	-0.29	-0.56	-0.54	-0.08	-0.02	-0.17	NA	NA	NA	NA	NA	NA	NA
SPAC29E6.03c	0	-0.1	-0.3	-0.41	-0.03	0.01	-0.14	NA	NA	NA	NA	NA	NA	NA
SPAC29E6.04	0	-0.59	-1.08	-0.36	0.12	-0.03	0	NA	NA	NA	NA	NA	NA	NA
SPAC29E6.05c	0	-0.13	0.34	0.76	0.42	-0.07	0	NA	NA	NA	NA	NA	NA	NA
SPAC29E6.06c	0	-0.02	-0.92	-1.05	-0.48	-0.3	-0.55	NA	NA	1	NA	NA	NA	NA
SPAC29E6.07	0	0.08	0.81	0.08	-0.44	0.04	-0.39	NA	NA	NA	NA	NA	NA	NA
SPAC29E6.08	0	-0.3	1.42	1.73	1.11	0.94	1.41	NA	NA	NA	NA	NA	NA	1
SPAC29E6.09	0	0.2	0.72	0.83	0.43	0.15	0.3	NA	NA	1	NA	NA	NA	NA
SPAC29E6.10c	0	-0.28	0.16	-0.01	-0.05	0.25	0.36	NA	NA	NA	NA	NA	NA	NA
SPAC2C4.03c	0	-0.05	-0.37	-0.21	-0.02	-0.01	-0.27	NA	NA	NA	NA	NA	NA	NA
SPAC2C4.04c	0	-0.06	-0.23	-0.09	0.01	-0.4	-0.67	NA	NA	NA	NA	NA	NA	NA
SPAC2C4.05	0	0.01	-0.17	-0.04	-0.15	0.17	-0.11	NA	NA	NA	NA	NA	NA	NA
SPAC2C4.06c	0	-0.32	-0.76	-0.76	-0.22	-0.14	-0.62	NA	1	1	NA	NA	NA	NA
SPAC2C4.08	0	-0.01	-0.08	0.14	0.06	-0.01	0.13	NA	NA	NA	NA	NA	NA	NA
SPAC2C4.09	0	0.15	0.36	0.2	0.03	-0.05	0.06	NA	NA	NA	NA	NA	NA	NA
SPAC2C4.10c	0	0.03	0.27	0.26	0.13	-0.12	0.14	NA	NA	NA	NA	NA	NA	NA
SPAC2C4.11c	0	-0.21	-1.26	-1.33	-0.31	-0.04	-0.56	NA	1	1	NA	NA	1	NA
SPAC2C4.12c	0	-0.47	-1.26	-1.34	-0.11	-0.2	-0.55	NA	1	1	NA	NA	NA	NA
SPAC2C4.13	0	-0.21	-0.54	-0.62	-0.18	-0.07	-0.31	NA	NA	NA	NA	NA	NA	NA
SPAC2C4.14c	0	-0.17	-0.35	-0.5	-0.43	-0.12	-0.16	NA	NA	NA	NA	NA	NA	NA
SPAC2C4.15c	0	0.21	0.7	0.45	0.52	0.05	0.14	NA	NA	NA	NA	NA	NA	NA
SPAC2C4.16c	0	0.04	0.04	-0.04	0.01	0	-0.18	NA	1	1	NA	NA	NA	NA
SPAC2C4.17c	0	1.39	2.63	1.88	1.14	1.17	2.34	1	NA	1	NA	NA	NA	NA
SPAC2E12.02	0	0.76	1.51	0.78	0.36	0.22	0.58	NA	NA	NA	NA	NA	NA	1
SPAC2E12.03c	0	0.08	0.94	1.42	0.72	0.18	0.65	NA	NA	NA	NA	NA	NA	NA
SPAC2E1P3.01	0	0.45	0.87	1.28	1.29	0.23	0.74	1	NA	1	NA	NA	NA	NA
SPAC2E1P3.02c	0	0.29	0.23	0.24	0.28	0.01	0.01	NA	NA	NA	NA	NA	NA	NA
SPAC2E1P3.03c	0	-0.34	-0.42	0.09	0.53	0.15	0.35	NA	NA	NA	NA	NA	NA	NA
SPAC2E1P3.04	0	-0.11	-0.25	0.31	0.06	-0.15	0.3	NA	NA	NA	NA	NA	NA	NA
SPAC2E1P3.05c	0	-0.16	-0.89	-1.66	-1.08	-1.11	-1.15	NA	NA	NA	NA	NA	NA	NA
SPAC2E1P5.01c	0	-0.18	-0.67	-0.37	-0.13	0.17	-0.09	NA	NA	NA	NA	NA	NA	NA
SPAC2E1P5.02c	0	-0.01	0.23	0.11	-0.33	0.05	-0.19	NA	NA	NA	NA	NA	NA	NA
SPAC2E1P5.03	0	-0.32	-0.94	-1.24	-1.3	-0.7	-1.24	NA	1	1	NA	NA	NA	NA
SPAC2E1P5.04c	0	0.09	-0.11	-0.55	-0.5	-0.1	-0.35	NA	NA	NA	NA	NA	NA	NA
SPAC2E1P5.05	0	-0.47	-1.35	-1.24	-0.34	-0.17	-0.52	NA	1	1	NA	NA	1	NA
SPAC2F3.01	0	0.32	0.66	0.09	-0.36	0.05	0.7	NA	NA	NA	NA	NA	NA	NA
SPAC2F3.02	0	-0.06	0	-0.04	-0.14	0.12	-0.16	NA	NA	NA	NA	NA	NA	NA
SPAC2F3.03c	0	-0.18	-0.9	-1.19	-0.57	-0.25	-0.87	NA	1	1	NA	NA	NA	NA
SPAC2F3.04c	0	-0.03	-0.21	-0.68	-0.54	-0.29	-0.67	NA	NA	NA	NA	NA	NA	NA
SPAC2F3.05c	0	2.51	2.89	1.96	0.74	0.16	0.68	1	NA	1	NA	NA	NA	NA
SPAC2F3.06c	0	0.3	0.22	0.39	0.33	0.45	0.05	NA	NA	NA	NA	NA	NA	NA
SPAC2F3.08	0	1.62	2.75	2.75	1.77	1.49	1.63	1	NA	1	NA	NA	NA	NA
SPAC2F3.09	0	0.27	0.34	-0.01	-0.68	-0.28	0.17	NA	NA	NA	NA	NA	NA	NA
SPAC2F3.10	0	0.13	0.27	0.24	0.33	0.32	0.45	NA	NA	1	NA	NA	NA	NA
SPAC2F3.11	0	-0.25	-0.48	-0.61	-0.33	-0.24	-0.46	NA	NA	1	NA	NA	NA	NA
SPAC2F3.13c	0	-0.07	-0.94	-1	-0.28	-0.1	-0.48	NA	NA	1	NA	NA	NA	NA
SPAC2F3.14c	0	0.06	0.37	0.33	0.24	0.23	0.47	NA	NA	NA	NA	NA	NA	NA
SPAC2F3.15	0	-0.06	-0.17	-0.17	-0.1	-0.13	-0.06	NA	NA	NA	NA	NA	NA	NA
SPAC2F3.16	0	0.66	1.23	0.85	0.59	0.35	0.68	NA	NA	1	NA	NA	NA	NA
SPAC2F3.18c	0	-0.12	-0.51	-0.46	-0.56	-0.15	-0.27	NA	NA	NA	NA	NA	NA	NA
SPAC2F7.02c	0	0.14	0.04	-0.32	-0.38	-0.18	-0.36	NA	NA	NA	NA	NA	NA	NA
SPAC2F7.03c	0	-0.52	-0.62	-0.3	-0.3	0.02	0.17	NA	NA	NA	NA	NA	NA	NA
SPAC2F7.04	0	-0.45	-0.58	-0.49	-0.16	0.03	-0.11	NA	NA	NA	NA	NA	NA	NA
SPAC2F7.05c	0	-0.43	-0.19	-0.5	0.05	0	0.5	NA	NA	1	NA	NA	1	NA
SPAC2F7.06c	0	0.66	1.15	1.48	0.67	0.6	0.99	NA	NA	NA	NA	NA	NA	NA
SPAC2F7.07c	0	0.14	0.52	0.29	-0.1	-0.06	0.02	NA	NA	NA	NA	NA	NA	NA
SPAC2F7.08c	0	0.11	0.24	0.16	-0.16	-0.01	0.19	NA	NA	NA	NA	NA	NA	NA
SPAC2F7.09c	0	-0.17	0.01	0.03	0.08	-0.06	0.21	NA	NA	NA	NA	1	NA	NA
SPAC2F7.10	0	0.02	0.49	-0.13	-0.13	-0.13	-0.26	NA	NA	NA	1	NA	NA	NA
SPAC2F7.11	0	-0.12	-0.69	-0.76	-0.28	-0.16	-0.21	NA	NA	1	NA	NA	1	NA
SPAC2F7.13c	0	-0.11	-0.68	-1	-0.87	-0.61	-1.2	NA	NA	1	NA	NA	NA	NA
SPAC2F7.14c	0	-0.3	-0.6	-0.83	-0.56	-0.34	-0.92	NA	1	1	NA	NA	1	NA
SPAC2F7.15	0	-0.18	-0.41	-0.67	-0.23	-0.01	-0.27	NA	NA	NA	NA	NA	NA	NA
SPAC2F7.16c	0	0.09	-0.34	-0.21	0.2	0.14	0.53	NA	NA	NA	NA	NA	NA	NA
SPAC2F7.17	0	-0.23	-0.08	-0.17	0.12	0.18	0.2	NA	NA	NA	NA	1	1	NA
SPAC2G11.02	0	0.04	-0.52	-0.6	-0.22	-0.09	-0.39	NA	NA	1	NA	NA	NA	NA
SPAC2G11.03c	0	0.16	0.28	0.23	0.4	0.23	0.29	NA	NA	NA	NA	NA	NA	NA
SPAC2G11.04	0	-0.05	-0.07	0.09	0.04	-0.01	0.09	NA	NA	NA	NA	NA	NA	NA
SPAC2G11.05c	0	-0.11	0.01	0.13	0.47	0.2	0.57	NA	NA	NA	NA	NA	NA	NA
SPAC2G11.06	0	-0.04	-0.11	-0.3	0.05	-0.05	-0.1	NA	NA	NA	NA	NA	NA	NA
SPAC2G11.07c	0	-0.01	0.58	0.76	0.92	0.69	0.84	NA	NA	1	NA	NA	NA	NA
SPAC2G11.08c	0	-0.09	0.02	0.22	0.09	0.16	0.27	NA	NA	NA	NA	NA	NA	NA
SPAC2G11.09	0	0.18	0.93	0.84	0.57	0.47	0.52	NA	NA	NA	NA	NA	NA	NA
SPAC2G11.10c	0	-0.12	0.28	0.4	0.52	0.16	0.14	NA	NA	NA	NA	NA	NA	NA
SPAC2G11.11c	0	-0.12	-0.32	-0.32	0.13	0.17	-0.03	NA	NA	1	NA	NA	NA	NA
SPAC2G11.12	0	-0.14	-0.36	-0.28	-0.11	-0.09	0.17	NA	NA	NA	NA	NA	NA	NA
SPAC2G11.13	0	0.54	1.26	1.45	0.87	0.42	1.51	1	NA	1	NA	NA	NA	NA
SPAC2G11.14	0	0.35	0.75	0.68	0.48	0.23	0.53	NA	NA	NA	NA	NA	NA	NA
SPAC2G11.15c	0	0.12	0.23	0.46	0.12	0	-0.01	NA	NA	NA	NA	NA	NA	NA
SPAC2H10.01	0	0.9	3.04	-0.58	-1.06	-1.13	-0.02	NA	1	1	NA	NA	NA	1
SPAC2H10.02c	0	0.11	0.39	0.33	0.26	-0.12	-0.18	NA	NA	NA	NA	NA	NA	NA
SPAC30.01c	0	0.13	0	-0.17	0.04	0.22	0.15	NA	NA	NA	NA	NA	NA	NA
SPAC30.02c	0	-0.16	-0.84	-0.84	-0.11	-0.16	-0.4	NA	NA	1	NA	NA	NA	NA
SPAC30.03c	0	-0.01	-0.58	-0.63	-0.23	-0.35	-0.51	NA	NA	NA	NA	NA	1	NA
SPAC30.04c	0	0.1	0.35	0.27	-0.23	-0.05	0.12	NA	NA	NA	NA	NA	NA	NA
SPAC30C2.02	0	-0.3	-1.67	-1.89	-1.1	-0.28	-0.68	NA	1	1	NA	1	NA	NA
SPAC30C2.03	0	0.21	-0.09	0.45	0.35	-0.03	-0.61	NA	NA	NA	NA	NA	NA	NA
SPAC30C2.04	0	0.03	-1.15	-1.3	-0.24	-0.13	-0.64	NA	NA	1	NA	NA	1	NA
SPAC30C2.06c	0	-0.32	-0.64	-0.64	-0.09	-0.1	-0.14	NA	NA	NA	NA	NA	NA	NA
SPAC30C2.07	0	-0.02	0.17	0.16	0.16	0.21	0.3	NA	NA	NA	NA	NA	NA	NA
SPAC30C2.08	0	-0.05	0.1	-0.13	0.12	-0.07	-0.06	NA	NA	NA	NA	NA	NA	NA
SPAC30D11.01c	0	0.45	1.23	0.9	0.43	0.99	1.25	1	NA	1	NA	NA	NA	NA
SPAC30D11.03	0	-0.14	-0.91	-0.93	-0.22	-0.13	-0.22	NA	NA	1	NA	NA	1	NA
SPAC30D11.04c	0	-0.18	0.16	0.08	0.24	0.19	0.29	NA	NA	NA	NA	NA	NA	NA
SPAC30D11.05	0	-0.2	-0.19	0.14	0.25	0.23	0	NA	NA	NA	NA	NA	NA	NA
SPAC30D11.06c	0	-0.22	0.13	0.25	0.23	0.12	0.39	NA	NA	NA	NA	NA	NA	NA
SPAC30D11.07	0	0.3	1.23	0.44	0	-0.05	-0.32	NA	NA	NA	NA	NA	NA	NA
SPAC30D11.08c	0	0.24	0.74	0.3	0.19	0.13	0.17	NA	NA	NA	NA	NA	NA	NA
SPAC30D11.09	0	0.1	0.21	0.15	0.42	0.39	0.1	NA	NA	NA	NA	NA	NA	NA
SPAC30D11.10	0	-0.19	0	0.27	0.23	0.28	0.39	NA	NA	NA	NA	NA	NA	NA
SPAC30D11.11	0	0.24	0.85	0	0.06	0.47	0.18	NA	NA	NA	NA	NA	NA	NA
SPAC30D11.12	0	0.24	-0.37	-0.76	-0.29	0.03	-0.45	NA	NA	1	NA	NA	NA	NA
SPAC30D11.13	0	-0.12	-0.08	0.12	0.1	-0.02	0.18	NA	NA	NA	NA	NA	NA	NA
SPAC30D11.14c	0	0.16	0.24	0.13	0.16	0.11	0.09	NA	NA	NA	NA	NA	1	NA
SPAC31A2.02	0	-0.06	-0.82	-0.96	-0.65	-0.21	-0.62	NA	1	1	NA	NA	NA	NA
SPAC31A2.03	0	-0.03	-0.2	-0.21	-0.05	-0.11	-0.12	NA	NA	NA	NA	NA	NA	NA
SPAC31A2.04c	0	0.15	0.44	-0.03	-0.04	-0.21	-0.31	NA	NA	NA	NA	NA	NA	NA
SPAC31A2.05c	0	-0.16	0.02	0.04	0.1	0.06	0.11	NA	NA	NA	NA	NA	NA	NA
SPAC31A2.06	0	0.29	0.69	0.3	-0.04	0.34	0.24	NA	NA	NA	NA	NA	NA	NA
SPAC31A2.07c	0	-0.19	-0.73	-0.75	-0.15	0	-0.36	NA	1	1	NA	NA	1	NA
SPAC31A2.08	0	0.04	0.07	0.08	-0.1	-0.11	-0.14	NA	NA	NA	NA	NA	NA	NA
SPAC31A2.09c	0	0.22	0.43	0.01	-0.1	-0.06	-0.2	NA	NA	NA	NA	NA	NA	NA
SPAC31A2.10	0	0.12	0.59	0.47	0.04	0.04	-0.08	NA	NA	NA	NA	NA	NA	NA
SPAC31A2.11c	0	0.21	0.34	0.53	0.22	0.1	0.09	NA	NA	NA	NA	NA	NA	1
SPAC31A2.12	0	0.8	1.9	1.14	0.53	0.52	0.51	NA	NA	NA	NA	NA	NA	NA
SPAC31A2.13c	0	0.17	0.42	0.87	0.53	0.17	0.3	NA	NA	NA	NA	1	NA	NA
SPAC31A2.14	0	-0.2	-0.05	0.11	0.13	0.09	0.7	NA	NA	1	NA	NA	NA	NA
SPAC31A2.15c	0	-0.18	-0.32	-0.22	-0.13	-0.14	0.02	NA	NA	NA	NA	NA	NA	NA
SPAC31A2.16	0	-0.15	-0.59	-0.38	-0.11	-0.2	-0.22	NA	NA	NA	NA	NA	NA	NA
SPAC31F12.01	0	0.21	0.67	0.55	0.16	0.14	0.33	NA	NA	NA	NA	NA	NA	NA
SPAC31G5.01	0	0.17	-0.16	-0.42	-0.34	-0.3	-0.78	NA	NA	NA	NA	NA	1	NA
SPAC31G5.02	0	-0.36	-0.58	-0.51	-0.28	-0.23	-0.27	NA	NA	1	NA	NA	NA	NA
SPAC31G5.03	0	-0.32	-0.59	-0.95	-0.4	-0.32	-0.52	NA	NA	1	NA	NA	1	NA
SPAC31G5.04	0	0.14	-0.52	-0.46	-0.58	-0.31	-0.64	NA	NA	1	NA	NA	NA	NA
SPAC31G5.05c	0	-0.27	-0.61	0.16	0.94	0.3	0.75	NA	NA	1	NA	NA	NA	NA
SPAC31G5.06	0	0.43	0.11	0.29	0.18	-0.04	0.01	NA	NA	NA	NA	NA	NA	NA
SPAC31G5.08	0	-0.44	-1.23	-0.85	-0.24	-0.4	-0.33	NA	1	1	NA	NA	NA	NA
SPAC31G5.09c	0	-0.37	-0.52	0.88	2.04	1.56	2.3	1	NA	1	NA	NA	NA	NA
SPAC31G5.11	0	-0.05	0.05	0.27	0.41	0.18	0.1	NA	NA	NA	1	NA	NA	NA
SPAC31G5.12c	0	1.08	1.33	0.91	-0.23	0.06	0.01	1	NA	1	NA	NA	NA	NA
SPAC31G5.13	0	0.2	0	-0.61	-0.03	-0.16	-0.41	NA	NA	NA	NA	NA	NA	NA
SPAC31G5.14	0	0.19	-0.81	-0.74	-0.6	-0.41	0.29	NA	NA	NA	NA	NA	NA	NA
SPAC31G5.15	0	0.08	0.33	0.56	0.48	0.23	0.48	NA	NA	1	NA	NA	NA	NA
SPAC31G5.16c	0	0.03	0.31	0.4	0.16	0.06	-0.07	NA	NA	NA	NA	NA	NA	NA
SPAC31G5.17c	0	-0.25	-1.02	-1.29	-0.42	-0.16	-0.62	NA	1	1	NA	NA	NA	NA
SPAC31G5.18c	0	0.23	1.32	1.47	1.26	0.47	0.77	NA	NA	NA	NA	NA	NA	NA
SPAC31G5.19	0	0.12	0.27	-0.04	0.03	0.15	0.05	NA	NA	NA	NA	NA	NA	NA
SPAC31G5.21	0	0.24	0.83	1.38	0.91	0.42	0.8	NA	NA	NA	NA	NA	NA	NA
SPAC323.01c	0	-0.15	-0.81	-0.82	-0.45	-0.07	-0.82	NA	NA	1	NA	NA	NA	NA
SPAC323.02c	0	0.2	0.36	0.02	0.22	0.02	-0.05	NA	NA	NA	NA	NA	NA	NA
SPAC323.04	0	-0.24	-0.52	-0.18	-0.47	-0.37	-0.4	NA	NA	NA	1	NA	NA	NA
SPAC323.05c	0	-0.1	-0.17	-0.01	-0.25	-0.16	-0.17	NA	NA	NA	NA	NA	NA	NA
SPAC323.06c	0	-0.22	-0.23	0.02	-0.11	-0.17	-0.21	NA	NA	NA	NA	NA	NA	NA
SPAC323.07c	0	-0.53	-1.31	-0.62	-0.55	-0.7	-0.17	NA	NA	NA	NA	NA	NA	NA
SPAC328.01c	0	0.3	0.45	0.11	0.1	0.17	0.08	NA	NA	NA	NA	NA	NA	NA
SPAC328.02	0	0.64	1.16	0.29	0.21	0.08	0.14	NA	NA	NA	NA	NA	NA	NA
SPAC328.03	0	0.92	2.11	1.21	1.09	0.44	0.54	NA	NA	1	NA	NA	NA	NA
SPAC328.04	0	0.96	2.37	1.35	0.34	0.51	0.46	NA	NA	NA	NA	NA	NA	NA
SPAC328.05	0	-0.05	-0.48	-0.42	-0.31	-0.04	-0.44	NA	NA	NA	NA	NA	1	NA
SPAC328.06	0	0.31	0.54	0.62	0.58	0.27	0.31	NA	NA	NA	NA	NA	NA	NA
SPAC328.07c	0	0.65	0.76	0.79	0.53	0.31	0.47	NA	NA	1	NA	NA	NA	NA
SPAC328.08c	0	-0.41	-0.48	0.43	0.27	-0.19	0.2	NA	NA	NA	NA	NA	NA	NA
SPAC328.09	0	0.07	-0.07	-0.14	-0.9	-0.87	-0.68	NA	NA	1	NA	NA	NA	NA
SPAC328.10c	0	-0.05	-0.02	-0.19	-0.15	-0.09	-0.14	NA	1	1	NA	NA	1	NA
SPAC32A11.01	0	1.04	2.13	1.19	0.24	0.26	1.63	1	NA	1	NA	NA	NA	NA
SPAC32A11.02c	0	3.53	6.51	4.11	1.89	1.45	3.38	1	NA	1	NA	NA	NA	NA
SPAC32A11.03c	0	0.01	0.53	0.62	0.69	0.46	0.92	NA	NA	NA	NA	NA	NA	1
SPAC32A11.04c	0	-0.12	-0.23	-0.22	-0.21	-0.08	-0.07	NA	NA	NA	NA	NA	1	NA
SPAC343.01c	0	-0.16	-0.81	-1.04	-0.51	-0.17	-0.52	NA	NA	1	NA	NA	NA	NA
SPAC343.02	0	-0.03	0.16	-0.32	-0.27	0.01	0.03	NA	NA	NA	NA	NA	NA	NA
SPAC343.03	0	-0.06	0.19	0.45	0.66	0.25	0.49	NA	NA	NA	NA	NA	NA	NA
SPAC343.04c	0	0.27	0.75	0.74	0.63	0.38	0.58	NA	NA	1	NA	NA	NA	NA
SPAC343.05	0	0.04	-0.26	-0.63	-0.05	-0.11	-0.23	NA	NA	NA	NA	NA	NA	NA
SPAC343.06c	0	0.62	1.67	1.8	0.55	0.32	0.32	NA	NA	1	NA	NA	NA	NA
SPAC343.07	0	-0.24	-0.83	-1.2	-0.41	-0.26	-0.45	NA	NA	NA	NA	NA	1	NA
SPAC343.08c	0	NA	-0.18	0.21	0	0.37	NA	NA	NA	NA	NA	NA	1	NA
SPAC343.09	0	0.14	-0.1	-0.55	-0.17	-0.5	-0.92	NA	NA	NA	NA	NA	NA	NA
SPAC343.10	0	0.27	0.7	0.33	-0.05	0.15	-0.16	NA	NA	NA	NA	NA	NA	NA
SPAC343.11c	0	0.8	1.02	0.66	0.26	0.54	0.97	NA	NA	1	NA	NA	NA	NA
SPAC343.13	0	-0.1	-0.1	-0.37	-0.51	-0.3	-0.26	NA	NA	NA	NA	NA	NA	NA
SPAC343.14c	0	0.18	-0.33	-0.77	-0.51	-0.5	-0.85	NA	NA	1	NA	NA	1	NA
SPAC343.15	0	0.05	0.27	0.17	-0.03	0.03	-0.14	NA	NA	NA	NA	NA	NA	NA
SPAC343.16	0	0.11	-0.16	0.16	-0.19	-0.31	0.12	NA	NA	NA	NA	NA	NA	NA
SPAC343.17c	0	0.17	0.33	0.37	0.27	0.25	0.21	NA	NA	NA	NA	NA	NA	NA
SPAC343.18	0	0.26	0.6	0.03	-0.11	0.05	-0.22	NA	NA	NA	NA	NA	NA	NA
SPAC343.19	0	0.07	-0.13	-0.16	0.03	0.21	0.12	NA	NA	NA	NA	NA	NA	NA
SPAC3A11.02	0	0.18	0.57	0.21	0.19	0.13	0	NA	NA	NA	NA	NA	NA	NA
SPAC3A11.03	0	-0.08	-0.08	-0.04	0.33	0.15	0.11	NA	NA	NA	NA	NA	NA	NA
SPAC3A11.04	0	0.22	0.65	0.36	0.07	0.13	-0.21	NA	NA	NA	NA	NA	NA	NA
SPAC3A11.05c	0	0.37	0.66	0.45	0.52	0.48	0.76	NA	NA	1	NA	NA	NA	NA
SPAC3A11.06	0	0.59	1.68	1.02	0.26	0.5	0.7	1	NA	1	NA	NA	NA	NA
SPAC3A11.07	0	0.05	1.11	1.44	0.21	0.75	0.92	NA	NA	1	NA	NA	NA	NA
SPAC3A11.08	0	0.33	0.55	0.46	0.4	0.24	0.24	NA	NA	NA	NA	NA	NA	NA
SPAC3A11.09	0	0.49	0.78	1.26	1.02	0.57	0.53	NA	NA	NA	NA	NA	NA	NA
SPAC3A11.10c	0	0.58	1.69	2.85	2.18	0.89	2.73	NA	NA	NA	NA	NA	NA	NA
SPAC3A11.11c	0	0.04	0.59	0.5	-0.27	0	0.01	NA	NA	NA	NA	NA	NA	NA
SPAC3A11.12c	0	0.31	0.6	0.23	0.49	0.19	0.07	NA	NA	NA	NA	NA	NA	NA
SPAC3A11.13	0	-0.1	-0.37	-0.47	-0.23	-0.21	-0.41	NA	NA	NA	NA	NA	NA	NA
SPAC3A12.02	0	0.01	0.05	0.5	0.57	0.32	0.33	1	NA	1	NA	NA	NA	NA
SPAC3A12.03c	0	-0.05	0.22	-0.03	-0.13	-0.16	-0.47	NA	NA	1	NA	NA	NA	NA
SPAC3A12.04c	0	0.01	0.25	-0.09	-0.21	-0.15	-0.54	NA	NA	NA	NA	NA	NA	NA
SPAC3A12.05c	0	-0.13	0.08	0.08	0.26	0.06	0.11	NA	NA	NA	NA	NA	NA	NA
SPAC3A12.06c	0	0.49	1.61	1.23	0.23	0.29	0.35	NA	NA	1	NA	NA	NA	NA
SPAC3A12.07	0	-0.19	-0.28	-0.26	-0.21	-0.1	-0.18	NA	NA	NA	NA	NA	NA	NA
SPAC3A12.08	0	0	0.55	0.9	0.65	0.17	0.58	1	NA	1	NA	NA	NA	NA
SPAC3A12.09c	0	-0.32	-0.33	-0.23	0.15	0.13	-0.11	NA	NA	NA	NA	NA	NA	NA
SPAC3A12.10	0	-0.04	-0.17	-0.57	-0.34	-0.27	-0.47	NA	1	1	NA	NA	NA	NA
SPAC3A12.11c	0	0.21	-0.06	-0.04	0.08	0.18	-0.05	NA	NA	NA	NA	NA	1	NA
SPAC3A12.12	0	0.06	-0.29	0.15	0.51	0.2	-0.13	NA	NA	NA	NA	1	NA	NA
SPAC3A12.13c	0	-0.17	-0.84	-1.01	-0.41	-0.19	-0.56	NA	NA	NA	1	NA	1	NA
SPAC3A12.14	0	0.19	0.91	0.38	0.23	0.27	0.27	NA	NA	NA	NA	NA	NA	NA
SPAC3A12.15	0	0.02	-0.43	-0.6	-0.24	-0.14	-0.08	NA	NA	NA	NA	NA	NA	NA
SPAC3A12.16c	0	-0.02	0.15	0.08	-0.11	-0.05	-0.18	NA	NA	NA	NA	NA	NA	NA
SPAC3A12.17c	0	0.23	0.22	-0.08	-0.33	-0.1	-0.27	NA	NA	NA	NA	NA	NA	NA
SPAC3A12.18	0	0.29	1	0.29	0.29	0.11	0.13	NA	NA	NA	NA	NA	NA	NA
SPAC3A12.19	0	0.18	0.61	0.27	-0.28	-0.08	-0.16	NA	NA	NA	NA	NA	NA	NA
SPAC3C7.01c	0	0.08	-0.02	-0.54	0.01	0.16	0.33	NA	NA	NA	NA	NA	NA	NA
SPAC3C7.02c	0	0.01	0.26	0.48	0.17	0.27	0.34	NA	NA	NA	NA	NA	NA	NA
SPAC3C7.03c	0	-0.14	0.35	0.49	0.19	0.18	0.2	NA	NA	NA	NA	1	NA	NA
SPAC3C7.04	0	0.03	0.79	0.67	0.33	0.2	0.46	NA	NA	NA	NA	NA	NA	1
SPAC3C7.05c	0	0.89	3.02	2.97	1.55	0.5	2.1	NA	NA	NA	NA	NA	NA	NA
SPAC3C7.06c	0	0.17	0.42	0.22	-0.25	-0.15	0.03	NA	NA	NA	NA	NA	NA	NA
SPAC3C7.07c	0	-0.14	-0.05	-0.24	-0.05	-0.08	-0.17	NA	NA	NA	NA	NA	NA	NA
SPAC3C7.08c	0	-0.01	-0.8	-1.35	-0.86	-0.49	-0.81	NA	1	1	NA	NA	NA	NA
SPAC3C7.09	0	0.04	0.48	0.45	0.05	-0.2	-0.17	NA	NA	NA	NA	NA	NA	NA
SPAC3C7.10	0	-0.18	-0.11	-0.13	-0.03	-0.23	-0.28	NA	NA	NA	NA	NA	NA	NA
SPAC3C7.11c	0	0.12	-0.04	0.11	0.16	-0.13	0.04	NA	NA	NA	NA	NA	NA	NA
SPAC3C7.12	0	-0.1	0.14	0	0.04	0	0.06	NA	NA	NA	NA	NA	NA	NA
SPAC3C7.13c	0	0.98	3.35	3.6	1.56	0.98	2.22	NA	NA	NA	NA	NA	NA	NA
SPAC3C7.14c	0	0.01	0.78	1.48	0.39	-1.24	-1.46	NA	1	1	NA	NA	NA	NA
SPAC3F10.02c	0	0.03	-0.04	-0.39	-0.29	0.12	-0.1	NA	NA	NA	NA	NA	NA	NA
SPAC3F10.03	0	-0.06	-0.72	-0.85	-0.35	-0.32	-0.52	NA	NA	1	NA	NA	NA	NA
SPAC3F10.04	0	0.01	-0.21	-0.65	-0.14	-0.27	-0.37	NA	NA	NA	1	NA	NA	NA
SPAC3F10.05c	0	-0.09	-0.11	-0.3	-0.15	-0.15	-0.09	NA	NA	NA	NA	1	NA	NA
SPAC3F10.06c	0	-0.19	-0.21	-0.1	-0.06	0	0.02	NA	NA	NA	NA	1	NA	NA
SPAC3F10.07c	0	-0.07	0.29	0.68	0.27	0.23	0.48	NA	NA	NA	NA	NA	NA	NA
SPAC3F10.08c	0	0.2	-0.5	-0.51	-0.04	-0.1	-0.08	NA	NA	1	NA	NA	NA	NA
SPAC3F10.09	0	-0.11	-0.5	-0.44	-0.03	-0.06	-0.09	NA	NA	NA	NA	NA	NA	NA
SPAC3F10.10c	0	-0.21	-0.12	0.1	0.12	-0.31	-0.23	NA	NA	NA	NA	NA	NA	NA
SPAC3F10.11c	0	0.09	-0.05	-0.48	-0.28	-0.21	0.03	NA	NA	NA	NA	NA	NA	NA
SPAC3F10.12c	0	-0.19	-0.6	-0.84	-0.58	-0.55	-0.73	NA	1	1	NA	NA	NA	1
SPAC3F10.13	0	0.47	0.72	-0.06	0	0.18	0.08	NA	NA	NA	NA	NA	NA	NA
SPAC3F10.15c	0	-0.24	-1.09	-1.08	0.27	0.3	0.16	NA	NA	NA	NA	NA	NA	NA
SPAC3F10.16c	0	0	-0.79	-0.99	-0.09	-0.03	-0.45	NA	1	1	NA	NA	NA	NA
SPAC3F10.17	0	-0.3	-0.83	-0.66	0.11	0.01	-0.09	NA	NA	1	NA	NA	NA	NA
SPAC3F10.18c	0	-0.51	-1.53	-1.81	-0.49	-0.2	-0.74	NA	1	1	NA	NA	NA	NA
SPAC3F10.19	0	0.24	0.72	0.81	1.1	0.35	0.94	NA	NA	1	NA	NA	NA	NA
SPAC3G6.01	0	-0.09	-0.2	-0.1	-0.4	-0.16	-0.34	NA	NA	NA	NA	NA	NA	NA
SPAC3G6.02	0	-0.36	-0.53	-0.2	0.08	0.03	-0.13	NA	NA	NA	NA	NA	NA	NA
SPAC3G6.03c	0	0.27	0.46	0.39	0.66	0.24	0.32	NA	NA	NA	NA	NA	NA	NA
SPAC3G6.04	0	0.04	-1.17	-1.3	-0.13	-0.03	-0.42	NA	NA	1	NA	NA	1	NA
SPAC3G6.06c	0	-0.1	0.13	-0.32	-0.67	-0.33	-0.81	NA	NA	1	NA	NA	NA	NA
SPAC3G6.08	0	-0.27	0.03	-0.05	-0.31	-0.45	-0.69	NA	NA	NA	NA	NA	NA	NA
SPAC3G6.09c	0	0.11	0.56	0.6	0.44	0.19	0.5	NA	NA	NA	NA	NA	NA	NA
SPAC3G6.10c	0	-0.08	0.56	0.34	0.11	0.29	0.12	NA	NA	NA	NA	NA	NA	NA
SPAC3G6.11	0	-0.44	-1.11	-0.84	-0.15	-0.19	-0.46	NA	NA	NA	NA	NA	NA	NA
SPAC3G9.01	0	-0.57	-0.53	-0.27	-0.1	0.01	-0.16	NA	NA	NA	NA	NA	NA	NA
SPAC3G9.02	0	-0.25	-1.22	-0.49	0.05	0.01	-0.36	NA	NA	NA	NA	NA	NA	NA
SPAC3G9.03	0	-0.08	-0.81	-0.7	-0.25	-0.12	-0.27	NA	1	1	NA	NA	NA	NA
SPAC3G9.04	0	-0.4	-0.33	-0.21	0.32	0.24	0.03	NA	NA	NA	NA	NA	NA	NA
SPAC3G9.05	0	0.03	-0.32	-0.08	-0.05	0.07	0.2	NA	NA	NA	NA	NA	NA	NA
SPAC3G9.06	0	-0.01	-0.6	-0.91	-0.34	-0.29	-0.53	NA	NA	1	NA	NA	1	NA
SPAC3G9.07c	0	0.07	-0.04	-0.48	-0.29	-0.27	-0.31	NA	NA	NA	NA	NA	NA	NA
SPAC3G9.08	0	-0.16	-0.16	-0.18	-0.19	-0.13	-0.08	NA	NA	NA	NA	NA	NA	NA
SPAC3G9.09c	0	0.1	-0.55	-0.66	-0.4	-0.25	-0.44	NA	1	1	NA	NA	1	NA
SPAC3G9.10c	0	-0.28	-0.98	-0.75	0	-0.1	-0.34	NA	NA	NA	NA	NA	NA	NA
SPAC3G9.11c	0	-0.14	0.76	5.19	6.14	3.22	6.25	NA	NA	NA	NA	NA	NA	NA
SPAC3G9.12	0	-0.27	-0.57	0.26	0.23	0.27	0.34	NA	NA	NA	NA	NA	NA	NA
SPAC3G9.13c	0	-0.28	-0.09	0.55	0.36	0.21	0.51	NA	NA	NA	NA	NA	NA	NA
SPAC3G9.14	0	0.05	-0.06	0.15	0.05	0.18	0.2	NA	NA	NA	NA	NA	NA	1
SPAC3G9.15c	0	0.05	0.24	0.09	-0.14	-0.01	-0.11	NA	NA	1	NA	NA	NA	NA
SPAC3G9.16c	0	-0.01	0.54	0.22	-0.41	-0.29	-0.37	NA	NA	NA	NA	NA	NA	NA
SPAC3G9.17	0	-0.21	-0.29	0.32	0.37	-0.1	0.22	NA	NA	NA	NA	NA	NA	NA
SPAC3H1.01c	0	-0.37	-0.43	-0.36	0.03	0.04	-0.05	NA	NA	NA	NA	NA	NA	NA
SPAC3H1.02c	0	0.07	0.31	-0.34	0.1	-0.01	-0.18	NA	NA	NA	NA	NA	NA	NA
SPAC3H1.03	0	-0.29	-0.55	-0.42	-0.14	-0.16	-0.33	NA	NA	NA	NA	NA	NA	NA
SPAC3H1.04c	0	0.02	0	0.2	0.21	0.18	0.38	NA	NA	NA	NA	NA	NA	NA
SPAC3H1.05	0	-0.12	-0.58	-0.16	0.34	0.07	0.3	NA	NA	NA	NA	NA	NA	NA
SPAC3H1.06c	0	-0.17	-0.54	0.19	0.16	-0.01	0.23	NA	NA	NA	NA	NA	NA	NA
SPAC3H1.07	0	-0.25	-1.03	-0.41	0.35	0.22	-1.12	NA	NA	NA	NA	NA	NA	NA
SPAC3H1.08c	0	-0.13	-0.03	0.32	0.25	0.1	0.36	NA	NA	NA	NA	NA	NA	NA
SPAC3H1.09c	0	-0.01	-0.51	-0.45	-0.07	-0.22	-0.39	NA	NA	NA	NA	NA	NA	NA
SPAC3H1.10	0	-0.2	-0.38	-0.37	-0.29	-0.39	-0.4	NA	NA	NA	NA	NA	NA	NA
SPAC3H1.11	0	-0.95	-0.08	0.86	0.7	0.29	0.66	NA	NA	NA	NA	NA	NA	1
SPAC3H1.12c	0	-0.19	0.27	0.58	0.19	0.09	0.31	NA	NA	NA	NA	NA	NA	NA
SPAC3H1.13	0	-0.02	-0.06	0.01	0.09	0	0.05	NA	NA	NA	NA	NA	NA	NA
SPAC3H1.14	0	0.3	0.69	0.8	0.44	0.13	0.4	NA	NA	NA	NA	NA	NA	NA
SPAC3H5.04	0	0.22	0.98	1.1	0.04	-0.02	0.39	NA	NA	NA	NA	NA	NA	NA
SPAC3H5.05c	0	-0.31	-0.54	-1.34	-0.47	-0.34	-0.62	NA	1	1	NA	NA	NA	NA
SPAC3H5.06c	0	-0.14	-0.92	-0.93	-0.38	-0.18	-0.22	NA	NA	NA	NA	NA	NA	NA
SPAC3H5.07	0	-0.11	-0.52	-1.07	-0.2	-0.19	-0.49	NA	1	1	NA	NA	NA	NA
SPAC3H5.08c	0	0.13	0.1	0.06	-0.17	-0.14	-0.17	NA	NA	NA	1	NA	NA	NA
SPAC3H5.09c	0	0.07	0.66	1.04	0.34	0.33	0.36	NA	NA	NA	NA	NA	NA	NA
SPAC3H5.10	0	-0.1	-0.09	-0.48	-0.17	-0.07	-0.31	NA	1	1	NA	NA	NA	NA
SPAC3H5.11	0	0.28	0.54	0.14	-0.25	-0.39	-0.16	NA	NA	NA	NA	NA	NA	NA
SPAC3H5.12c	0	-0.08	-0.16	-0.51	-0.09	-0.1	-0.1	NA	NA	1	NA	NA	1	NA
SPAC3H5.13	0	-0.22	-0.94	-0.54	-0.12	-0.17	-0.02	NA	NA	NA	NA	NA	NA	NA
SPAC3H8.02	0	0.03	-0.18	-0.83	-0.53	-0.08	0.22	NA	NA	NA	NA	NA	NA	NA
SPAC3H8.03	0	-0.17	-0.35	-0.2	-0.05	-0.24	-0.26	NA	NA	NA	NA	NA	NA	NA
SPAC3H8.04	0	0.71	0.72	0.6	0.34	0.21	0.58	NA	NA	NA	NA	NA	NA	NA
SPAC3H8.05c	0	-0.03	-0.13	-0.21	-0.03	0.04	-0.07	NA	NA	NA	NA	NA	NA	NA
SPAC3H8.06	0	0.18	0.82	0.65	0.39	0.29	1.06	NA	NA	1	NA	NA	NA	NA
SPAC3H8.07c	0	-0.25	-0.21	-0.13	-0.15	-0.22	-0.26	NA	NA	NA	NA	NA	NA	NA
SPAC3H8.08c	0	0.15	0.19	0.29	0.24	0.1	-0.01	NA	NA	NA	NA	NA	NA	1
SPAC3H8.09c	0	0.14	0.93	1.13	0.34	-0.47	-0.39	NA	NA	1	1	NA	1	NA
SPAC3H8.10	0	0.12	0.5	-0.24	-0.22	0.15	-0.27	NA	NA	NA	NA	NA	NA	NA
SPAC458.02c	0	-0.09	-0.19	-0.13	0.08	0.09	-0.05	NA	NA	NA	NA	NA	NA	NA
SPAC458.03	0	0.3	0.58	0.49	0.55	0.13	0.25	NA	NA	NA	NA	NA	NA	NA
SPAC458.04c	0	0.48	0.91	0.77	0.43	0.1	0.11	1	NA	1	NA	NA	NA	NA
SPAC458.05	0	0.47	1.23	1.18	0.87	0.54	0.92	NA	NA	1	NA	NA	NA	NA
SPAC458.07	0	0.06	0.22	0.12	0.2	0.11	-0.01	NA	NA	NA	NA	NA	NA	NA
SPAC4A8.02c	0	0.16	0.64	0.66	0.45	0.23	0.39	NA	NA	NA	NA	NA	NA	NA
SPAC4A8.03c	0	0.28	0.64	0.12	-0.2	-0.15	0.06	NA	NA	NA	NA	NA	NA	NA
SPAC4A8.04	0	0.53	2.48	3.77	2.72	1.28	3.29	1	NA	1	NA	1	NA	NA
SPAC4A8.05c	0	-0.1	-1.11	-0.48	0.42	0.47	0.94	NA	NA	NA	NA	NA	NA	NA
SPAC4A8.06c	0	-0.18	-0.37	-0.96	-0.47	-0.17	-0.42	NA	1	1	NA	NA	NA	NA
SPAC4A8.07c	0	-0.28	-1.13	-1.16	-0.9	-0.54	-0.2	NA	NA	1	NA	NA	NA	NA
SPAC4A8.08c	0	-0.09	-0.35	-0.25	-0.14	-0.12	0.09	NA	NA	NA	NA	NA	NA	NA
SPAC4A8.09c	0	0.11	0.37	0.2	0.32	0.51	0.24	NA	NA	NA	NA	NA	NA	NA
SPAC4A8.10	0	0.28	0.39	0.51	0.71	0.79	0.57	NA	NA	1	NA	NA	NA	NA
SPAC4A8.11c	0	0.26	-0.03	-0.63	0	0.2	0.04	NA	NA	NA	NA	NA	NA	NA
SPAC4A8.12c	0	0.06	0.06	-0.18	0.06	0.01	-0.16	NA	NA	NA	NA	NA	NA	NA
SPAC4A8.13c	0	0.08	0.19	0.06	0.47	0.17	0.08	NA	NA	NA	NA	NA	NA	NA
SPAC4A8.14	0	-0.12	0.13	-0.18	0.18	0.02	-0.02	NA	NA	NA	NA	NA	NA	NA
SPAC4A8.15c	0	-0.12	-0.45	-0.22	0.03	0.01	-0.14	NA	NA	NA	NA	NA	NA	NA
SPAC4A8.16c	0	0.34	0.29	0.41	0.16	0.25	0.13	NA	NA	1	NA	NA	1	NA
SPAC4C5.01	0	-0.36	-1.08	-0.87	-0.93	-0.57	-0.62	NA	1	1	NA	NA	NA	NA
SPAC4C5.02c	0	-0.02	0.29	-0.01	-0.37	-0.19	-0.06	NA	NA	NA	NA	NA	NA	NA
SPAC4C5.03	0	0.68	0.44	-0.01	0.05	0.19	1.01	NA	NA	NA	NA	NA	NA	NA
SPAC4C5.04	0	0.01	-0.88	-0.92	-0.38	-0.37	-0.56	NA	NA	NA	NA	NA	NA	NA
SPAC4D7.01c	0	0.19	0.41	0.35	0.16	0.15	0.31	NA	NA	NA	NA	NA	NA	NA
SPAC4D7.02c	0	0.34	2.21	2.7	1.54	0.82	1.95	1	NA	1	NA	NA	NA	NA
SPAC4D7.03	0	-0.4	-0.03	0.09	0.33	0.12	0.25	NA	NA	NA	NA	NA	NA	NA
SPAC4D7.04c	0	0.15	0.21	-0.4	-0.12	0.31	-0.21	NA	NA	NA	NA	NA	NA	NA
SPAC4D7.05	0	-0.04	-0.34	-0.12	0.01	0.03	-0.04	NA	NA	1	NA	NA	1	NA
SPAC4D7.06c	0	-0.16	-0.71	-0.43	-0.01	-0.14	0.1	NA	NA	NA	NA	NA	NA	NA
SPAC4D7.07c	0	-0.04	-0.23	-0.15	0.01	0.08	0.13	NA	NA	NA	NA	NA	NA	NA
SPAC4D7.08c	0	0.13	-0.53	-0.76	-0.9	-0.57	-0.75	NA	1	1	NA	NA	NA	NA
SPAC4D7.09	0	-0.15	-0.72	-0.85	-0.53	-0.42	-0.69	NA	NA	1	NA	NA	1	NA
SPAC4D7.10c	0	0.16	0.61	0.98	0.29	0.19	0.39	NA	NA	1	NA	NA	NA	NA
SPAC4D7.11	0	0.12	0.2	0.62	0.61	0.54	0.93	NA	NA	1	NA	NA	NA	NA
SPAC4D7.12c	0	-0.15	-0.55	-0.78	-0.14	-0.18	-0.36	NA	1	1	NA	NA	NA	NA
SPAC4D7.13	0	0.03	0.18	-0.18	0.02	0.17	0.03	NA	NA	NA	NA	NA	1	NA
SPAC4D7.14	0	0.04	0.28	0.21	-0.24	-0.01	0	NA	NA	NA	NA	NA	NA	NA
SPAC4F10.02	0	0.19	0.74	0.89	1.03	0.16	0.6	1	NA	1	NA	NA	NA	NA
SPAC4F10.03c	0	-0.08	-0.26	-0.16	-0.07	-0.09	-0.12	NA	NA	NA	NA	NA	NA	NA
SPAC4F10.04	0	-0.16	0.18	0.12	-0.1	-0.32	-0.62	NA	NA	NA	NA	NA	NA	NA
SPAC4F10.05c	0	-0.1	-0.52	-0.3	-0.14	-0.09	0.13	NA	NA	NA	NA	NA	NA	NA
SPAC4F10.06	0	0.02	-0.82	-0.85	-0.36	-0.13	0.03	NA	NA	1	NA	NA	NA	NA
SPAC4F10.07c	0	0.61	1.48	1.7	1.06	0.65	1.39	1	NA	1	NA	NA	NA	NA
SPAC4F10.09c	0	-0.24	-1.16	-1.18	-0.4	-0.22	-0.52	NA	1	1	NA	NA	NA	NA
SPAC4F10.10c	0	0.19	0.39	-0.22	-0.31	0.01	0.05	NA	NA	NA	NA	NA	NA	NA
SPAC4F10.11	0	-0.1	-0.06	-0.32	-0.12	0.01	0.09	NA	NA	NA	NA	NA	NA	NA
SPAC4F10.12	0	-0.33	-0.1	-0.07	-0.22	-0.2	-0.24	NA	NA	NA	NA	NA	NA	NA
SPAC4F10.13c	0	-0.23	0.13	-0.2	0.15	0.17	0.28	NA	NA	NA	NA	NA	NA	NA
SPAC4F10.14c	0	-0.31	-1.11	-1.17	-0.02	0.07	0.29	NA	1	1	NA	NA	NA	NA
SPAC4F10.15c	0	-0.05	0.1	0.14	0.3	0.47	2.16	NA	NA	NA	NA	NA	NA	NA
SPAC4F10.16c	0	-0.19	0.24	1.11	0.87	0.57	1.28	NA	NA	NA	NA	NA	NA	NA
SPAC4F10.17	0	0.54	0.85	2.05	1.78	0.84	2.33	NA	NA	NA	NA	NA	NA	NA
SPAC4F10.18	0	0.09	-0.09	-0.13	-0.15	-0.03	-0.07	NA	NA	NA	NA	NA	NA	NA
SPAC4F10.19c	0	0.04	0.16	-0.09	-0.09	-0.24	-0.4	NA	1	1	NA	NA	NA	NA
SPAC4F10.20	0	-0.01	0.82	0.83	0.66	-0.13	0.24	NA	NA	NA	NA	NA	NA	NA
SPAC4F10.22	0	-0.35	-0.39	1.01	1.17	0.53	0.73	NA	NA	NA	NA	NA	NA	NA
SPAC4F8.01	0	-0.43	-0.54	0.01	0.51	0.19	0.38	NA	NA	NA	NA	NA	NA	NA
SPAC4F8.02c	0	-0.29	0.25	-0.01	-0.01	0.01	-0.24	NA	NA	NA	NA	NA	NA	NA
SPAC4F8.03	0	0.05	-0.23	-0.73	-0.41	-0.08	-0.45	NA	NA	1	NA	1	NA	NA
SPAC4F8.04	0	-0.08	-0.88	-0.91	-0.35	-0.09	-0.59	NA	1	1	NA	NA	1	NA
SPAC4F8.05c	0	-0.2	-0.35	-0.59	-0.58	-0.28	-0.28	NA	NA	NA	NA	NA	NA	NA
SPAC4F8.06	0	-0.07	0.38	0.67	0.26	0.07	0.12	NA	NA	NA	NA	NA	NA	NA
SPAC4F8.07c	0	0.11	0.73	1.71	0.63	0.83	0.94	NA	NA	1	NA	NA	NA	NA
SPAC4F8.08	0	0.01	-0.37	0.12	0.39	0.01	0.26	NA	NA	NA	NA	NA	NA	NA
SPAC4F8.10c	0	0.28	1.45	1.41	0.14	0.09	0.27	NA	NA	NA	NA	NA	NA	NA
SPAC4F8.11	0	0.02	0.33	0.48	0.5	0.31	0.46	NA	NA	NA	NA	NA	NA	NA
SPAC4F8.12c	0	0.27	0.47	0.4	0.49	0.36	0.63	NA	NA	NA	NA	NA	1	NA
SPAC4F8.13c	0	0.11	0.29	0.31	0.35	0.44	0.6	NA	NA	NA	NA	NA	NA	NA
SPAC4F8.14c	0	-0.14	-0.96	-1.47	-0.69	-0.56	-1.18	NA	NA	1	NA	NA	NA	NA
SPAC4F8.15	0	0.07	0.46	0.13	-0.4	-0.24	0.03	NA	NA	NA	NA	NA	NA	NA
SPAC4G8.02c	0	-0.25	-0.73	-0.84	-0.33	-0.25	-0.55	NA	NA	NA	NA	NA	NA	NA
SPAC4G8.03c	0	1.32	1.17	-0.07	-0.3	-0.1	-0.06	NA	NA	NA	NA	NA	1	NA
SPAC4G8.04	0	0.15	1.01	1.02	0.51	0.33	0.96	NA	NA	NA	NA	NA	NA	NA
SPAC4G8.05	0	0.38	1.25	0.72	0.01	-0.02	0.54	NA	NA	NA	NA	NA	NA	NA
SPAC4G8.06c	0	-0.37	-0.41	-0.62	-0.3	-0.25	-0.2	NA	NA	1	NA	NA	NA	NA
SPAC4G8.07c	0	-0.05	-0.29	-0.47	-0.33	-0.29	-0.2	NA	NA	1	NA	NA	NA	NA
SPAC4G8.08	0	-0.19	-0.11	-0.16	-0.18	-0.38	-0.23	NA	NA	NA	NA	NA	NA	NA
SPAC4G8.09	0	-0.07	0.22	0.32	0.33	0.19	0.24	NA	NA	NA	NA	NA	1	NA
SPAC4G8.11c	0	-0.12	-0.2	-0.1	0.06	0	NA	NA	NA	NA	1	NA	NA	NA
SPAC4G8.12c	0	-0.07	0.3	0.21	-0.11	-0.08	0.23	NA	NA	NA	NA	NA	NA	NA
SPAC4G8.13c	0	0.19	0.21	0.22	0.14	0.41	2.16	NA	NA	NA	NA	NA	NA	1
SPAC4G9.02	0	0.06	-0.42	-0.66	-0.01	-0.32	-0.38	NA	NA	NA	NA	NA	1	NA
SPAC4G9.03	0	-0.23	-1.18	-1.78	-1.07	-0.53	-1.18	NA	1	1	NA	NA	NA	NA
SPAC4G9.04c	0	0.37	0.75	0.2	-0.06	0.09	0.11	NA	NA	NA	NA	NA	NA	NA
SPAC4G9.06c	0	-0.12	-0.05	-0.1	-0.42	-0.14	-0.13	NA	NA	NA	NA	NA	NA	NA
SPAC4G9.08c	0	0.01	-0.34	-0.39	0.27	0.03	-0.23	NA	NA	NA	NA	NA	NA	NA
SPAC4G9.09c	0	0.07	-0.13	-0.3	-0.24	-0.1	0.45	NA	NA	NA	NA	NA	NA	NA
SPAC4G9.10	0	-0.02	-0.57	-0.5	-0.4	-0.45	-0.2	NA	NA	NA	NA	NA	NA	NA
SPAC4G9.11c	0	0.4	1.54	1.22	0.18	0.15	0.29	NA	NA	1	NA	NA	NA	NA
SPAC4G9.12	0	0.15	1.88	2.88	1.44	1.96	2.13	1	NA	1	NA	NA	NA	NA
SPAC4G9.13c	0	0.36	0.61	0.35	0.6	0.44	0.68	NA	NA	NA	NA	NA	NA	NA
SPAC4G9.14	0	-0.21	-0.33	-0.18	-0.51	-0.17	-0.54	NA	NA	NA	NA	NA	NA	NA
SPAC4G9.15	0	-0.05	0.13	0.5	-0.32	-0.17	0.03	NA	NA	NA	NA	NA	NA	NA
SPAC4G9.16c	0	-0.06	-0.27	-0.65	-0.18	-0.04	-0.11	NA	1	1	NA	NA	1	NA
SPAC4G9.17c	0	-0.03	0.22	-0.08	-0.13	0.08	0.15	NA	NA	NA	NA	NA	1	NA
SPAC4G9.19	0	0.54	1.97	2.14	0.63	0.41	0.81	1	NA	1	NA	NA	NA	NA
SPAC4G9.20c	0	-0.53	-1.72	-1.16	-0.87	-0.5	-0.89	NA	NA	NA	NA	1	NA	NA
SPAC4H3.01	0	-0.36	-1.74	-1.75	-0.98	-0.5	-0.46	NA	1	1	NA	NA	NA	NA
SPAC4H3.02c	0	-0.23	-0.35	-0.22	-0.04	-0.05	-0.08	NA	NA	NA	NA	NA	NA	NA
SPAC4H3.03c	0	2.21	4.93	4.91	3.97	2.36	3.15	1	NA	1	NA	NA	NA	NA
SPAC4H3.04c	0	0.47	2.37	3.01	2.32	0.97	1.6	1	NA	1	NA	NA	NA	NA
SPAC4H3.05	0	-0.31	-0.06	0.03	0.05	-0.01	-0.02	NA	NA	NA	NA	NA	NA	NA
SPAC4H3.06	0	-0.27	-0.86	-0.74	-0.36	-0.19	-0.72	NA	1	1	NA	NA	NA	NA
SPAC4H3.07c	0	-0.29	-0.63	-0.04	0.08	0.24	-0.66	NA	NA	NA	NA	NA	NA	NA
SPAC4H3.08	0	1.02	3.52	5.14	4.91	3.26	1.75	1	NA	1	NA	NA	NA	NA
SPAC4H3.09	0	0	0.04	0.19	0.01	-0.04	-0.28	NA	NA	NA	NA	NA	NA	NA
SPAC4H3.10c	0	0.02	-0.99	-1.95	-0.88	-0.57	-0.84	NA	NA	1	NA	NA	NA	NA
SPAC4H3.11c	0	0	-0.01	-0.1	0	0.03	-0.02	NA	NA	NA	NA	NA	NA	NA
SPAC4H3.13	0	-0.22	-0.14	0.11	0.04	-0.29	0.17	NA	NA	NA	NA	NA	NA	NA
SPAC4H3.14c	0	-0.23	-0.73	-0.83	-0.08	-0.23	-0.44	NA	NA	NA	NA	NA	NA	NA
SPAC4H3.16	0	-0.19	-0.22	-0.2	-0.21	0.03	-0.15	NA	NA	NA	NA	NA	NA	NA
SPAC513.01c	0	0.11	0.12	0.08	0.03	-0.09	-0.06	NA	NA	NA	NA	NA	1	NA
SPAC513.02	0	2.82	4.55	2.69	1.66	1.02	1.81	NA	NA	NA	NA	NA	NA	NA
SPAC513.03	0	-0.78	-1.94	-0.68	1.93	2.04	3.04	1	NA	1	NA	NA	NA	NA
SPAC513.05	0	0.14	1.12	1.37	1.02	0.2	0.99	1	NA	1	NA	NA	NA	NA
SPAC513.06c	0	0.37	1.8	1.62	1.44	0.1	0.75	NA	NA	NA	NA	NA	NA	NA
SPAC513.07	0	0.94	-1.38	-1.62	-0.81	-0.95	-1.27	NA	NA	NA	NA	NA	NA	NA
SPAC521.02	0	-0.02	0.03	0.21	-0.25	-0.17	-0.05	NA	NA	NA	NA	NA	NA	NA
SPAC521.03	0	0.11	0.51	0.94	0.29	-0.29	0.52	NA	NA	NA	NA	NA	NA	NA
SPAC521.04c	0	0.42	0.84	0.61	0.1	-0.28	0.34	NA	NA	1	NA	NA	NA	NA
SPAC521.05	0	-0.18	-0.7	-1.07	-0.32	-0.09	-0.36	NA	1	1	NA	NA	NA	NA
SPAC56E4.02c	0	0.08	0.61	0.83	0.25	-0.04	0.25	NA	NA	NA	NA	NA	NA	NA
SPAC56E4.03	0	-0.17	-0.92	-0.82	-0.67	-0.77	-0.63	NA	NA	1	NA	NA	NA	NA
SPAC56E4.04c	0	0.28	0.21	0.32	0.65	0.8	0.49	NA	NA	NA	NA	NA	NA	NA
SPAC56E4.05	0	0.08	0.28	0.13	0.09	0.12	-0.21	NA	NA	NA	NA	NA	NA	NA
SPAC56E4.06c	0	0.3	0.56	0.52	0.55	0.54	1.09	NA	NA	1	NA	NA	NA	NA
SPAC56E4.07	0	-0.01	-0.11	-0.42	-0.95	-0.72	-0.76	NA	1	1	NA	NA	NA	NA
SPAC56F8.02	0	0.02	0.56	0.41	0.21	-0.01	-0.03	NA	NA	NA	NA	NA	NA	NA
SPAC56F8.03	0	-0.08	-1.24	-0.65	0.14	0.11	-0.18	NA	NA	NA	NA	NA	1	NA
SPAC56F8.04c	0	-0.13	-0.58	-0.7	-0.59	-0.48	-0.64	NA	NA	NA	NA	NA	NA	NA
SPAC56F8.05c	0	-0.04	-0.51	-0.67	-1.28	-0.71	-1.22	NA	1	1	NA	NA	NA	NA
SPAC56F8.06c	0	-0.01	-0.3	-0.18	-0.11	0.1	-0.23	NA	NA	NA	NA	NA	NA	NA
SPAC56F8.07	0	-0.06	-0.14	-0.2	-0.24	-0.02	-0.05	NA	NA	NA	NA	NA	NA	NA
SPAC56F8.08	0	-0.01	-0.06	-0.15	-0.02	-0.06	0	NA	NA	NA	NA	NA	NA	NA
SPAC56F8.09	0	-0.26	-0.72	-0.85	-0.45	-0.16	-0.57	NA	1	1	NA	NA	NA	NA
SPAC56F8.10	0	0.28	-0.08	-1.09	-0.57	-0.26	-0.45	NA	NA	1	NA	NA	NA	NA
SPAC56F8.11	0	-0.25	-0.24	-0.17	0.08	0.01	-0.03	NA	NA	NA	NA	NA	NA	NA
SPAC56F8.14c	0	0.6	-0.11	0.75	1.36	1.28	1.11	NA	NA	NA	NA	NA	NA	NA
SPAC56F8.15	0	0.71	-0.21	1.51	2.1	1.41	1.46	NA	NA	NA	NA	NA	NA	NA
SPAC56F8.16	0	0.11	-0.18	0.75	1	0.54	0.94	NA	NA	NA	NA	NA	NA	1
SPAC57A10.02	0	0.03	0.42	0.46	0.11	0.14	-0.1	NA	NA	NA	NA	NA	NA	NA
SPAC57A10.03	0	-0.26	-0.5	-0.51	-0.49	-0.29	-0.71	NA	NA	NA	NA	NA	NA	NA
SPAC57A10.05c	0	0.23	0.61	1.01	0.33	0.12	0.79	NA	NA	NA	NA	NA	NA	NA
SPAC57A10.07	0	-0.12	-0.3	-0.23	-0.17	0.09	-0.06	NA	NA	NA	NA	NA	NA	NA
SPAC57A10.08c	0	0.29	0.8	0.66	0.42	0.08	0.49	1	NA	1	NA	NA	NA	NA
SPAC57A10.09c	0	0.67	1.95	1.39	0.14	0.29	0.18	NA	NA	1	NA	NA	NA	NA
SPAC57A10.10c	0	0.04	-1.33	-1.86	-0.3	-0.1	-0.82	NA	1	1	NA	NA	1	NA
SPAC57A10.11c	0	-0.05	0.17	0.52	0.51	0.31	0.25	NA	NA	1	NA	NA	NA	NA
SPAC57A10.12c	0	0.2	-0.89	-1.56	-0.9	-0.62	-1.42	NA	1	1	NA	NA	NA	NA
SPAC57A10.14	0	-0.19	-0.02	0.46	0.27	0.05	0.17	NA	NA	NA	NA	NA	NA	NA
SPAC57A7.04c	0	0.32	0.05	0.1	0.09	0.2	-0.05	NA	NA	1	NA	NA	1	NA
SPAC57A7.05	0	0.98	2.74	2.79	0.65	1.1	2.36	1	NA	1	NA	NA	NA	NA
SPAC57A7.06	0	-0.61	-1.29	-0.95	-0.31	-0.25	-0.26	NA	1	1	NA	NA	1	NA
SPAC57A7.07c	0	-0.17	-0.21	-0.29	0.03	-0.08	-0.03	NA	NA	NA	NA	NA	NA	NA
SPAC57A7.08	0	0.15	0.58	0.79	0.81	0.53	0.79	NA	NA	1	NA	NA	NA	NA
SPAC57A7.09	0	0.61	1.99	1.85	0.46	0.25	0.66	1	NA	1	NA	NA	NA	NA
SPAC57A7.10c	0	0.25	0.53	0.35	0.54	0.25	0.38	NA	NA	NA	NA	NA	NA	NA
SPAC57A7.11	0	0.12	0.56	0.38	0.1	0.24	0.25	NA	NA	NA	NA	NA	NA	NA
SPAC57A7.12	0	0.12	-0.85	-1.14	-0.72	-0.5	-1.13	NA	1	1	NA	NA	NA	NA
SPAC57A7.13	0	-0.14	0.21	0.19	-0.07	-0.06	0.15	NA	NA	NA	NA	NA	1	NA
SPAC57A7.15c	0	-0.04	0.01	0.17	0.21	-0.1	-0.06	NA	NA	NA	NA	NA	NA	NA
SPAC589.03c	0	-0.24	-0.19	-0.14	-0.15	-0.41	-0.69	NA	NA	NA	NA	NA	NA	NA
SPAC589.04	0	-0.46	-0.37	0.04	0.32	0.11	0.05	NA	NA	NA	NA	NA	NA	NA
SPAC589.05c	0	-0.08	-0.35	-0.07	0.29	0.15	-0.05	NA	NA	NA	NA	NA	NA	NA
SPAC589.06c	0	0.08	-0.3	-0.51	-0.11	-0.07	-0.33	NA	NA	NA	NA	NA	NA	NA
SPAC589.07c	0	0.66	1.6	1.39	1.22	0.89	1.21	1	NA	1	NA	NA	NA	NA
SPAC589.08c	0	0.26	0.65	0.62	0.33	0.42	0.27	NA	NA	NA	NA	NA	NA	NA
SPAC589.09	0	-0.01	-0.17	-0.35	0.45	0.67	-0.31	NA	NA	NA	NA	NA	NA	NA
SPAC589.10c	0	-0.24	-0.28	-0.26	-0.16	-0.19	-0.05	NA	1	1	NA	NA	NA	NA
SPAC589.12	0	0.2	0.16	0.04	0.03	-0.05	0.31	NA	NA	NA	NA	NA	NA	NA
SPAC5D6.01	0	-0.1	-0.49	-0.69	-0.21	-0.08	-0.39	NA	1	1	NA	NA	NA	NA
SPAC5D6.02c	0	-0.15	-0.03	-0.22	-0.38	-0.17	-0.05	NA	NA	NA	NA	NA	NA	NA
SPAC5D6.04	0	0.58	0.96	1.04	0.66	0.53	1.68	NA	NA	NA	NA	NA	NA	NA
SPAC5D6.05	0	-0.32	-0.45	-0.07	-0.13	-0.26	-0.5	NA	NA	NA	NA	NA	NA	NA
SPAC5D6.06c	0	-0.08	-0.23	0.11	0.24	-0.09	0.22	NA	NA	NA	NA	NA	NA	NA
SPAC5D6.07c	0	1.14	2.43	1.82	0.53	0.47	0.52	1	NA	1	NA	NA	NA	NA
SPAC5D6.08c	0	-0.27	0	0.45	0.33	0.23	0.67	1	NA	1	NA	NA	NA	NA
SPAC5D6.09c	0	0.47	1.09	1.73	2.35	1.97	3.99	1	NA	1	NA	NA	NA	NA
SPAC5D6.12	0	0.12	-0.19	-0.14	-0.06	0.08	-0.1	NA	NA	NA	NA	NA	NA	NA
SPAC5D6.13	0	0.05	-0.28	-0.44	-0.05	0.15	0.19	NA	NA	NA	NA	NA	NA	NA
SPAC5H10.01	0	0.02	0.74	1.22	0.9	0.08	2.79	1	NA	1	NA	NA	NA	NA
SPAC5H10.02c	0	0.91	2.39	2.7	1.74	1.27	2.53	NA	NA	NA	NA	NA	NA	NA
SPAC5H10.03	0	-0.06	-2.3	-3.04	-3.31	-2.35	-3.07	NA	1	1	NA	NA	NA	NA
SPAC5H10.05c	0	-0.11	-0.33	-0.23	-0.08	-0.76	-1.23	NA	NA	NA	NA	NA	NA	NA
SPAC5H10.06c	0	-0.55	-1.69	-1.28	-1.07	-0.56	-0.68	NA	1	1	NA	NA	NA	NA
SPAC5H10.08c	0	-0.23	-0.24	-0.22	-0.16	0.43	0.37	NA	NA	NA	NA	NA	NA	NA
SPAC5H10.09c	0	-0.28	-0.31	-0.29	-0.43	0.18	0	NA	NA	NA	NA	NA	NA	NA
SPAC5H10.10	0	-0.06	-0.46	0.18	-0.91	-0.96	-0.84	NA	NA	NA	NA	NA	NA	NA
SPAC5H10.11	0	-0.01	0.75	0.52	-0.4	-0.28	-0.17	NA	NA	NA	NA	NA	NA	NA
SPAC5H10.12c	0	-0.02	-0.96	-1.46	-1.57	-0.91	-1.23	NA	1	1	NA	NA	NA	NA
SPAC5H10.13c	0	-0.05	-0.8	-0.32	-0.29	-0.1	0.46	NA	NA	NA	NA	NA	NA	NA
SPAC607.02c	0	-0.19	-1.13	-0.83	-0.39	-0.46	-0.7	NA	1	1	NA	NA	NA	NA
SPAC607.03c	0	-0.16	-1.16	-1.72	-0.81	-0.45	-0.91	NA	1	1	NA	NA	1	NA
SPAC607.04	0	-0.56	-1.06	-1.18	-0.82	-0.68	-1.01	NA	1	1	NA	NA	NA	NA
SPAC607.05	0	0.06	0.05	-0.39	0.03	-0.16	-0.22	NA	NA	NA	NA	NA	NA	NA
SPAC607.06c	0	0.02	-0.22	-0.46	-0.04	-0.05	-0.08	NA	NA	NA	NA	NA	NA	NA
SPAC607.07c	0	0.21	1.09	0.85	0.4	0.41	0.58	NA	NA	NA	NA	NA	NA	NA
SPAC607.08c	0	0.57	1.92	1.21	0.36	0.6	0.65	NA	NA	1	NA	NA	NA	NA
SPAC607.09c	0	0.59	1.51	1.29	0.24	0.49	0.48	NA	NA	1	NA	NA	NA	NA
SPAC630.03	0	0.14	0.69	0.7	0.2	0.13	0.02	NA	NA	NA	NA	NA	NA	NA
SPAC630.04c	0	0.18	1.03	1.2	0.3	0.05	0.77	NA	NA	NA	1	NA	NA	NA
SPAC630.05	0	0.64	1.35	0.86	0.62	0.37	1.22	1	NA	1	NA	NA	NA	NA
SPAC630.06c	0	-0.09	-0.11	-0.58	-0.71	-0.33	-0.55	NA	NA	1	NA	NA	NA	NA
SPAC630.07c	0	0.35	0.98	1.34	0.83	0.47	0.96	NA	NA	1	NA	NA	NA	NA
SPAC630.08c	0	-0.22	-1.56	-1.2	-0.48	0.45	1	NA	NA	1	NA	NA	NA	NA
SPAC630.09c	0	0.11	0.83	0.45	0.06	0.1	0.29	NA	NA	NA	NA	NA	NA	NA
SPAC630.10	0	0.02	0.1	-0.04	-0.47	-0.34	-0.47	NA	NA	NA	NA	NA	NA	NA
SPAC630.11	0	-0.01	0.29	0.62	0.5	0.36	0.44	NA	NA	NA	NA	NA	NA	NA
SPAC630.12	0	-0.05	-0.13	-0.37	-0.05	-0.04	-0.18	NA	NA	NA	NA	NA	NA	NA
SPAC630.13c	0	-0.02	-0.17	-0.2	0.01	0.09	0.15	NA	NA	NA	NA	NA	NA	NA
SPAC630.14c	0	0.09	0.36	0.11	-0.06	0.02	-0.05	NA	NA	NA	NA	NA	NA	NA
SPAC630.15	0	-0.15	-0.3	-0.46	-0.32	-0.08	NA	NA	NA	NA	NA	NA	NA	NA
SPAC631.01c	0	0.07	0.1	-0.15	-0.02	-0.14	-0.46	NA	NA	NA	NA	NA	NA	NA
SPAC631.02	0	0.83	1.15	0.49	0.31	0.64	0.99	NA	NA	NA	NA	NA	NA	NA
SPAC637.03	0	2.63	5.3	5.19	3.39	2.38	3.7	1	NA	1	NA	NA	NA	NA
SPAC637.04	0	0.24	-0.05	-0.33	-0.28	-0.07	-0.2	NA	NA	NA	NA	NA	NA	NA
SPAC637.05c	0	0.04	-0.39	-0.54	0.12	0.11	-0.14	NA	NA	NA	NA	NA	NA	NA
SPAC637.06	0	0.08	0.45	0.11	0.05	0.13	0.17	NA	NA	NA	NA	NA	NA	NA
SPAC637.07	0	0.26	-0.08	-0.14	-0.02	0.01	-0.19	NA	NA	1	1	NA	1	NA
SPAC637.08	0	-0.01	-0.07	0.03	0.06	-0.17	-0.37	NA	NA	NA	NA	NA	NA	NA
SPAC637.09	0	0.24	0.12	-0.05	-0.26	-0.21	-0.4	NA	NA	1	NA	NA	NA	NA
SPAC637.10c	0	-0.13	-0.11	-0.14	0.29	-0.11	-0.08	NA	NA	NA	NA	NA	NA	NA
SPAC637.11	0	-0.17	-0.45	-0.49	-0.14	-0.16	-0.29	NA	NA	1	NA	NA	NA	NA
SPAC637.12c	0	-0.05	-0.34	-0.33	-0.17	-0.03	0	NA	NA	NA	NA	NA	NA	NA
SPAC637.13c	0	0.36	1.45	0.99	0.09	0.34	0.32	NA	NA	1	NA	NA	NA	NA
SPAC644.04	0	0.03	-0.12	-0.34	-0.39	-0.13	-0.5	NA	NA	NA	NA	NA	NA	NA
SPAC644.05c	0	-0.34	-1.06	-1.79	-0.41	0.05	-0.27	NA	NA	NA	NA	NA	NA	NA
SPAC644.06c	0	0.64	0.97	0.87	0.39	0.29	0.7	NA	NA	NA	NA	NA	NA	NA
SPAC644.07	0	0.12	0.55	0.31	0.3	0.23	0.35	NA	NA	NA	NA	NA	NA	NA
SPAC644.08	0	0	0.3	0.53	0.59	0.14	0.04	NA	NA	1	NA	NA	NA	NA
SPAC644.09	0	-0.17	0.01	0.09	-0.02	-0.08	-0.22	NA	NA	NA	NA	NA	NA	NA
SPAC644.10	0	-0.6	-0.86	-0.49	-0.16	-0.27	-0.24	NA	NA	NA	NA	NA	NA	NA
SPAC644.11c	0	-0.34	-0.22	0.13	0.36	0.27	0.34	NA	NA	NA	NA	NA	NA	NA
SPAC644.12	0	-0.2	-0.56	-0.51	-0.08	-0.05	-0.15	NA	NA	NA	NA	NA	NA	NA
SPAC644.13c	0	-0.11	-0.49	-0.19	0.3	0.12	0.11	NA	NA	NA	NA	NA	NA	NA
SPAC644.14c	0	-0.03	-0.48	-0.21	0.01	-0.31	-0.29	NA	NA	NA	NA	NA	NA	NA
SPAC644.15	0	-0.31	-0.96	-1.52	-0.4	-0.18	-0.56	NA	1	1	NA	NA	NA	NA
SPAC644.16	0	-0.19	-0.54	-0.09	-0.43	-0.33	-0.41	NA	NA	NA	NA	NA	1	NA
SPAC644.17c	0	-0.1	0.19	0.68	0.48	0.27	0.34	NA	NA	1	NA	NA	NA	NA
SPAC644.18c	0	0.1	0.32	0.35	0.24	0.08	0.06	NA	NA	NA	NA	NA	NA	NA
SPAC652.01	0	0.08	0.42	0.15	-0.22	-0.2	-0.04	NA	NA	NA	NA	NA	NA	NA
SPAC664.01c	0	-0.13	-0.48	-0.95	-0.72	-0.39	-0.58	NA	NA	NA	NA	NA	1	NA
SPAC664.02c	0	0.23	0.2	-0.2	-0.09	-0.11	-0.11	NA	NA	NA	NA	NA	NA	NA
SPAC664.03	0	0.14	0.31	0.28	-0.13	0.07	-0.15	NA	NA	NA	NA	NA	NA	NA
SPAC664.04c	0	-0.13	-0.89	-1.2	-0.41	-0.18	-0.75	NA	1	1	NA	NA	NA	NA
SPAC664.05	0	0.06	0.18	0	0.09	0.16	0.04	NA	NA	1	NA	NA	NA	NA
SPAC664.06	0	-0.19	-1.24	-1.32	-0.04	0.09	-0.32	NA	1	1	NA	NA	NA	NA
SPAC664.07c	0	-0.11	-0.28	-0.28	-0.44	-0.36	-0.55	NA	NA	NA	NA	NA	NA	NA
SPAC664.08c	0	-0.5	-1.14	-1.13	-0.26	-0.14	-0.44	NA	1	1	NA	NA	NA	NA
SPAC664.09	0	0.06	0.59	-0.36	-0.57	-0.97	-0.87	NA	1	1	NA	NA	NA	NA
SPAC664.10	0	0.04	-0.14	-0.35	-0.06	0.09	-0.05	NA	NA	NA	NA	NA	NA	NA
SPAC664.11	0	0.05	-0.37	-0.63	-0.01	-0.06	0.03	NA	NA	NA	NA	NA	NA	NA
SPAC664.12c	0	-0.1	-0.27	-0.04	-0.13	-0.29	-0.51	NA	NA	NA	NA	NA	NA	NA
SPAC664.13	0	-0.14	-0.38	0.14	0.02	-0.26	0.31	NA	NA	NA	NA	NA	NA	NA
SPAC664.14	0	0.06	0.08	0.01	-0.28	-0.28	-0.13	NA	NA	1	NA	NA	NA	NA
SPAC664.15	0	0.48	1.35	1.38	0.33	0.48	0.89	NA	NA	1	NA	NA	NA	NA
SPAC683.02c	0	-0.72	-1.74	-1.69	-1.07	-1.06	-1.4	NA	1	1	NA	NA	NA	NA
SPAC688.02c	0	-0.7	-0.7	-0.31	-0.21	-0.21	-0.2	NA	NA	NA	NA	NA	NA	NA
SPAC688.03c	0	0.27	1.57	1.68	1.23	0.61	1	1	NA	1	NA	NA	NA	NA
SPAC688.04c	0	1.41	3.88	3.3	1.62	1.01	1.86	1	NA	1	NA	NA	NA	NA
SPAC688.06c	0	-0.16	0.11	0.11	-0.22	-0.18	-0.07	NA	NA	NA	NA	NA	NA	NA
SPAC688.07c	0	0.03	0.25	0.43	0.31	0.44	0.85	NA	NA	1	NA	NA	NA	NA
SPAC688.08	0	-0.03	-0.29	-0.44	-0.04	0	0.21	NA	NA	NA	NA	NA	NA	NA
SPAC688.09	0	0.12	0.31	0.42	0.18	0.23	0.34	NA	NA	NA	NA	NA	NA	NA
SPAC688.10	0	-0.04	0.41	0.52	0.15	-0.06	0.16	NA	NA	NA	NA	NA	NA	NA
SPAC688.11	0	0.14	0.69	0.76	0.17	0.22	0.27	NA	NA	NA	NA	1	NA	NA
SPAC688.12c	0	-0.09	-0.08	-0.06	-0.18	-0.06	-0.03	NA	NA	NA	NA	NA	NA	NA
SPAC688.13	0	0.45	1.76	1.77	0.75	0.21	0.47	NA	NA	NA	NA	NA	NA	NA
SPAC688.14	0	-0.09	-1.01	-0.8	-0.16	-0.09	-0.15	NA	NA	NA	NA	NA	NA	NA
SPAC688.16	0	-0.26	-0.64	-0.37	-0.6	-0.64	-0.24	NA	NA	NA	NA	NA	NA	NA
SPAC694.02	0	0.18	-0.09	-0.29	0.06	-0.05	-0.16	NA	NA	NA	NA	NA	NA	NA
SPAC694.03	0	-0.13	-0.68	-0.43	-0.22	-0.36	-0.56	NA	NA	NA	NA	NA	NA	NA
SPAC694.04c	0	0.05	-0.47	-1.08	-0.58	-0.89	-0.79	NA	NA	NA	NA	NA	NA	NA
SPAC694.05c	0	0.01	-0.21	-0.46	-0.64	-0.35	-0.93	NA	NA	1	NA	NA	NA	NA
SPAC694.06c	0	-0.41	-0.83	-0.55	-0.27	-0.18	-0.02	NA	NA	NA	NA	NA	NA	NA
SPAC6B12.02c	0	0.09	1.27	0.79	0.14	0.21	0.31	NA	NA	NA	NA	NA	NA	NA
SPAC6B12.04c	0	-0.18	-0.4	-0.57	-0.61	-0.71	-0.55	NA	NA	NA	NA	NA	NA	NA
SPAC6B12.05c	0	0.04	0.01	0.09	-0.03	-0.3	0.27	NA	NA	NA	NA	1	NA	NA
SPAC6B12.06c	0	-0.15	0.64	1.16	0.13	-0.08	0.37	NA	NA	NA	NA	NA	NA	NA
SPAC6B12.07c	0	0.73	2	1.75	0.48	0.15	0.68	NA	NA	NA	NA	NA	NA	NA
SPAC6B12.09	0	-0.35	-0.7	-0.65	-0.21	-0.04	-0.06	NA	NA	1	NA	NA	NA	NA
SPAC6B12.10c	0	-0.05	-0.05	-0.03	0.22	-0.02	0.04	NA	NA	NA	NA	NA	NA	NA
SPAC6B12.11	0	0.04	0.13	-0.03	-0.14	-0.15	-0.16	NA	NA	NA	NA	NA	NA	NA
SPAC6B12.12	0	0.2	0.72	0.9	0.63	0.38	0.71	NA	NA	NA	1	NA	NA	NA
SPAC6B12.13	0	0.06	0.52	0.89	0.25	-0.1	0.37	NA	NA	NA	NA	NA	NA	NA
SPAC6B12.14c	0	-0.22	-0.34	-0.14	-0.07	-0.01	-0.11	NA	1	1	NA	NA	NA	NA
SPAC6B12.16	0	0.05	-0.09	0	-0.27	-0.01	NA	NA	NA	NA	NA	NA	NA	NA
SPAC6B12.18	0	-0.67	-0.66	-0.14	-0.86	-0.65	0.17	NA	1	1	NA	NA	NA	NA
SPAC6B12.19	0	-0.08	0.16	-0.1	-0.09	-0.13	-0.01	NA	NA	NA	NA	NA	NA	NA
SPAC6C3.02c	0	0.04	0.7	1.32	0.79	-0.22	0.21	NA	NA	NA	NA	NA	NA	NA
SPAC6C3.04	0	0.66	2.69	3.29	1.73	1.21	2.7	1	NA	1	NA	NA	NA	NA
SPAC6C3.06c	0	-0.09	-0.18	0.15	0.17	0.15	0	NA	NA	NA	NA	NA	NA	NA
SPAC6C3.08	0	0.3	0.77	0.47	0.49	0.25	0.23	1	NA	1	NA	NA	NA	NA
SPAC6C3.09	0	0.03	-0.32	-0.64	-0.75	-0.39	-0.76	NA	NA	NA	NA	NA	NA	NA
SPAC6F12.02	0	0.38	1.1	1.32	0.9	0.66	1.13	NA	NA	1	NA	NA	NA	1
SPAC6F12.03c	0	0.41	1	1.14	0.56	0.26	0.78	1	NA	1	NA	1	NA	NA
SPAC6F12.04	0	0.16	-0.05	-0.1	0.4	0.44	1.06	NA	NA	NA	NA	NA	NA	NA
SPAC6F12.05c	0	-0.04	-0.19	-0.07	-0.23	-0.32	-0.22	NA	NA	NA	NA	NA	NA	NA
SPAC6F12.06	0	-0.12	-0.21	0.06	0.43	0.31	0.26	NA	NA	NA	NA	NA	NA	NA
SPAC6F12.07	0	-0.26	-0.26	-0.18	-0.18	-0.1	-0.22	NA	NA	NA	NA	NA	NA	NA
SPAC6F12.08c	0	0.18	0.41	0.32	0.22	0.19	0.32	NA	NA	NA	NA	NA	NA	NA
SPAC6F12.09	0	-0.26	0	-0.11	-0.02	0.11	0.22	NA	NA	NA	NA	NA	NA	NA
SPAC6F12.10c	0	0.09	-0.65	-0.75	-0.38	-0.44	-0.49	NA	NA	1	NA	NA	NA	NA
SPAC6F12.11c	0	0.04	0.45	0.19	0.1	0.23	0.25	NA	NA	NA	NA	NA	NA	NA
SPAC6F12.12	0	0.21	0.81	0.58	0.28	0.41	0.55	NA	NA	NA	NA	NA	NA	NA
SPAC6F12.13c	0	-0.08	-0.24	-0.7	-0.46	-0.31	-0.7	NA	NA	NA	NA	NA	NA	NA
SPAC6F12.14	0	-0.09	-0.26	-0.08	0.4	0.01	0.15	NA	NA	NA	NA	NA	NA	NA
SPAC6F12.15c	0	0.2	0.21	0.2	0.46	0.18	0.27	NA	NA	NA	NA	NA	NA	NA
SPAC6F12.16c	0	0.01	-0.49	-0.63	-0.28	-0.04	-0.17	NA	NA	1	NA	NA	1	NA
SPAC6F12.17	0	0.23	-0.08	-0.21	0.15	0.15	-0.04	NA	NA	NA	NA	NA	NA	NA
SPAC6F6.01	0	0.15	0.31	0.53	0.6	0.38	0.48	NA	NA	NA	NA	1	NA	NA
SPAC6F6.02c	0	0.11	0.06	0.44	0.22	0.03	-0.17	NA	NA	NA	NA	NA	NA	NA
SPAC6F6.03c	0	-0.26	-0.91	-0.89	-0.02	0.04	-0.12	NA	NA	1	NA	NA	NA	NA
SPAC6F6.04c	0	-0.12	0.48	0.09	-0.29	-0.38	-0.63	NA	NA	NA	NA	NA	NA	NA
SPAC6F6.05	0	0.07	0.11	0.24	0.04	0.1	0.57	NA	NA	NA	NA	NA	NA	NA
SPAC6F6.06c	0	-0.14	-0.08	0.23	0.23	0.26	0.28	NA	NA	NA	NA	NA	NA	NA
SPAC6F6.07c	0	0.19	0.18	0.03	-0.03	-0.05	-0.29	NA	1	1	NA	NA	NA	NA
SPAC6F6.08c	0	-0.11	0.63	1.02	0.56	0.29	0.63	NA	NA	NA	NA	NA	NA	NA
SPAC6F6.09	0	0.16	0.52	0.28	-0.14	-0.13	-0.21	NA	NA	NA	NA	NA	NA	NA
SPAC6F6.10c	0	0.06	0.57	0.73	0.24	-0.06	0.02	NA	NA	NA	NA	NA	NA	NA
SPAC6F6.11c	0	-0.47	-1.55	-1.23	-0.84	-0.8	-0.78	NA	1	1	NA	NA	NA	NA
SPAC6F6.12	0	0.37	1.08	1.03	0.4	0.11	0.35	NA	NA	NA	NA	NA	NA	NA
SPAC6F6.13c	0	-0.1	0.47	0.32	-0.06	0	0.35	NA	NA	NA	NA	NA	NA	NA
SPAC6F6.15	0	0.1	0.28	0.52	0.56	0.19	0.55	NA	NA	NA	NA	NA	NA	NA
SPAC6F6.16c	0	-0.22	-0.37	0.03	0.48	0.26	0.31	NA	NA	NA	NA	NA	NA	NA
SPAC6F6.17	0	-0.13	-0.5	-0.51	-0.02	0	-0.04	NA	NA	1	NA	NA	NA	NA
SPAC6F6.19	0	-0.7	-0.62	-0.27	-0.14	-0.16	0.21	NA	NA	NA	NA	NA	NA	NA
SPAC6G10.02c	0	-0.07	0.16	0.37	0.02	0.03	0.04	NA	NA	NA	NA	NA	NA	NA
SPAC6G10.03c	0	0.21	0.85	1.16	0.39	-0.34	-0.05	NA	NA	NA	NA	NA	NA	NA
SPAC6G10.04c	0	0.1	0.07	-0.2	-0.12	-0.14	-0.28	NA	NA	NA	NA	NA	NA	NA
SPAC6G10.05c	0	-0.05	-0.37	-0.01	0.1	0.27	0.34	NA	NA	NA	NA	NA	NA	NA
SPAC6G10.07	0	0.14	-0.5	-0.78	-0.17	0.01	-0.32	NA	NA	NA	NA	NA	1	NA
SPAC6G10.08	0	-0.01	-0.36	-0.22	0.26	-0.22	-0.06	NA	NA	NA	NA	NA	NA	NA
SPAC6G10.09	0	0.08	-0.22	-0.17	0.16	0.2	0.32	NA	NA	NA	NA	NA	NA	NA
SPAC6G10.10c	0	0.21	0.14	0.11	-0.13	-0.07	-0.1	NA	NA	NA	NA	NA	NA	NA
SPAC6G10.11c	0	-0.16	-0.33	-0.45	-0.18	-0.17	0.04	NA	1	1	NA	NA	NA	NA
SPAC6G10.12c	0	-0.49	-3.34	-3.37	-0.06	0.24	0.01	NA	NA	NA	NA	NA	NA	1
SPAC6G9.01c	0	-0.57	-0.71	-0.31	-0.21	-0.24	-0.09	NA	1	1	NA	NA	NA	NA
SPAC6G9.02c	0	-0.01	-0.98	-0.99	-0.33	-0.12	-0.66	NA	1	1	NA	NA	1	NA
SPAC6G9.03c	0	-0.27	-0.41	-0.47	-0.31	-0.35	-0.54	NA	NA	NA	NA	NA	NA	NA
SPAC6G9.04	0	-0.3	-0.09	-0.21	-0.12	-0.14	0.18	NA	NA	1	NA	NA	NA	NA
SPAC6G9.05	0	-0.34	-0.42	-0.05	-0.14	-0.11	-0.08	NA	NA	NA	NA	NA	NA	NA
SPAC6G9.06c	0	-0.25	-0.26	0.17	0.32	0.25	0.58	NA	NA	NA	NA	NA	NA	NA
SPAC6G9.07c	0	-0.05	0.24	0.53	0.16	0.06	0.03	NA	NA	NA	NA	NA	NA	NA
SPAC6G9.08	0	0.11	0.05	-0.38	0.3	0.12	-0.01	NA	NA	NA	NA	NA	NA	NA
SPAC6G9.09c	0	-0.04	-0.78	-1.38	-0.38	-0.18	-0.55	NA	1	1	NA	NA	1	NA
SPAC6G9.10c	0	0.15	-0.25	-0.75	0	0.06	0.01	NA	1	1	NA	NA	NA	NA
SPAC6G9.11	0	0.04	0.16	0.32	0.04	0.15	0.31	NA	NA	NA	NA	NA	NA	NA
SPAC6G9.12	0	-0.01	-0.14	-0.45	-0.17	-0.06	0.24	NA	NA	NA	NA	NA	NA	NA
SPAC6G9.14	0	0.55	1.1	0.76	0.22	0.31	0.24	NA	NA	NA	NA	NA	1	NA
SPAC6G9.15c	0	-0.54	-0.26	-0.13	0.04	0.08	0.06	NA	NA	NA	NA	NA	NA	NA
SPAC6G9.16c	0	-0.01	0.68	1.39	0.94	0.42	1.13	1	NA	1	NA	NA	NA	NA
SPAC732.01	0	-0.15	-0.31	-0.25	-0.04	-0.06	-0.16	NA	NA	NA	NA	NA	NA	NA
SPAC732.02c	0	0.39	0.87	0.66	0.58	0.35	0.66	1	NA	1	NA	NA	NA	NA
SPAC750.01	0	0.06	-1.07	-1.92	-0.77	-1.64	-1.74	NA	NA	NA	NA	NA	NA	NA
SPAC750.05c	0	0.62	1.6	0.86	-0.68	-0.51	-0.08	NA	NA	NA	NA	NA	NA	NA
SPAC750.06c	0	0.63	1.23	0.55	-0.11	0.27	0.2	NA	NA	NA	NA	NA	NA	NA
SPAC750.08c	0	0.12	1.05	0.62	-0.14	-0.74	-0.72	NA	NA	NA	NA	NA	NA	NA
SPAC767.01c	0	0.18	0.6	0.49	0.62	0.41	0.83	NA	NA	1	NA	NA	NA	NA
SPAC7D4.02c	0	-0.27	-0.44	-0.28	-0.26	-0.08	-0.06	NA	NA	NA	NA	NA	NA	NA
SPAC7D4.03c	0	0.69	1.06	0.71	0.63	0.69	1.15	NA	NA	1	NA	NA	NA	NA
SPAC7D4.04	0	-0.4	-0.24	-0.1	0.54	0.7	0.79	NA	NA	1	NA	NA	NA	NA
SPAC7D4.05	0	-0.12	-0.32	-0.02	0.3	-0.26	-0.14	NA	NA	NA	NA	NA	NA	NA
SPAC7D4.06c	0	-0.33	-0.25	-0.02	-0.01	-0.04	-0.36	NA	NA	NA	NA	NA	NA	NA
SPAC7D4.07c	0	-0.01	0.06	-0.68	-0.59	-0.65	-0.77	NA	NA	1	NA	NA	NA	NA
SPAC7D4.09c	0	-0.26	-0.56	-0.3	-0.13	0.01	-0.06	NA	NA	NA	NA	NA	NA	NA
SPAC7D4.10	0	0.06	-0.31	-0.54	-0.08	-0.03	-0.18	NA	NA	NA	NA	NA	NA	NA
SPAC7D4.11c	0	0	-0.54	-0.34	0.05	-0.12	-0.01	NA	NA	NA	NA	NA	NA	NA
SPAC7D4.12c	0	0.44	0.65	0.26	0.1	-0.1	-0.01	NA	NA	NA	NA	NA	NA	NA
SPAC7D4.13c	0	-0.11	-0.21	-0.14	-0.07	-0.03	-0.2	NA	NA	NA	NA	NA	NA	NA
SPAC7D4.14c	0	-0.11	-0.34	-0.46	-0.24	-0.24	-0.19	NA	NA	NA	NA	NA	NA	NA
SPAC7D4.15c	0	0	-0.42	-0.44	-0.43	-0.03	-0.2	NA	NA	NA	NA	NA	NA	NA
SPAC806.02c	0	0.06	-0.28	-0.21	-0.04	-0.27	-0.31	NA	NA	1	NA	NA	NA	NA
SPAC806.03c	0	-0.37	-1.37	-1.99	-0.54	-0.21	-0.79	NA	1	1	NA	NA	NA	NA
SPAC806.04c	0	0.15	0.65	0.76	0.65	0.04	-0.02	1	NA	1	NA	NA	NA	NA
SPAC806.05	0	0.01	0.09	-0.23	-0.67	-0.37	-0.54	NA	NA	NA	NA	NA	NA	NA
SPAC806.06c	0	-0.14	-0.38	-0.7	-0.66	-0.5	-0.55	NA	NA	1	NA	NA	NA	NA
SPAC806.07	0	-0.25	0.09	0.83	0.61	-0.08	0.03	NA	NA	NA	NA	NA	NA	NA
SPAC806.08c	0	-0.73	-0.18	-0.03	-0.09	0.02	-0.07	NA	NA	NA	NA	NA	NA	NA
SPAC821.03c	0	0.51	0.96	0.11	-0.86	-0.03	-0.5	NA	NA	NA	NA	NA	NA	NA
SPAC821.04c	0	0.4	0.81	0.52	0.37	0.38	0.71	NA	NA	1	NA	NA	1	NA
SPAC821.05	0	0.09	0.05	-0.25	-0.12	-0.13	-0.38	NA	NA	1	NA	NA	1	NA
SPAC821.06	0	-0.03	-0.17	0	0.25	-0.04	-0.12	NA	NA	NA	NA	NA	NA	NA
SPAC821.07c	0	-0.27	-0.53	-0.62	-0.5	-0.48	-0.66	NA	NA	1	NA	NA	NA	1
SPAC821.08c	0	-0.49	-2.18	-1.95	0.11	0.25	-0.25	NA	NA	NA	NA	NA	NA	NA
SPAC821.09	0	-1.42	-2.86	-3.5	-1.6	-0.76	-1.58	NA	1	1	NA	NA	NA	NA
SPAC821.10c	0	-0.78	0.1	-0.18	-0.73	-0.37	0.85	NA	NA	NA	NA	NA	NA	NA
SPAC821.11	0	0.06	0.02	-0.41	-0.29	-0.32	-0.62	NA	1	1	NA	NA	NA	NA
SPAC821.12	0	0.22	0.74	0.92	0.55	0.35	0.54	NA	NA	NA	NA	NA	NA	NA
SPAC821.13c	0	0.27	0.2	0.31	0.3	0.34	1.28	NA	NA	NA	NA	NA	NA	NA
SPAC823.03	0	1.16	2.55	1.58	0.26	0.42	1.01	1	NA	1	NA	NA	NA	NA
SPAC823.04	0	-0.3	-1.03	-0.84	-0.22	0.01	-0.26	NA	NA	1	NA	NA	NA	NA
SPAC823.05c	0	-0.18	-0.34	-0.23	0.08	0.28	0.05	NA	NA	NA	NA	NA	NA	NA
SPAC823.06	0	0.31	0.89	0.15	-0.1	0.15	-0.08	NA	NA	NA	NA	NA	NA	NA
SPAC823.07	0	0.32	0.63	0.25	-0.26	-0.1	-0.46	NA	NA	NA	NA	NA	NA	NA
SPAC823.08c	0	-0.03	-0.84	-1	-0.39	-0.16	-0.55	NA	1	1	NA	NA	NA	NA
SPAC823.09c	0	0.47	1.22	1.11	0.7	0.54	0.28	NA	NA	NA	NA	NA	NA	NA
SPAC823.10c	0	-0.15	-0.28	-0.52	-0.55	-0.39	-0.62	NA	NA	NA	1	NA	NA	NA
SPAC823.11	0	0.1	0.29	0.03	-0.62	-0.19	-0.42	NA	NA	NA	NA	NA	NA	NA
SPAC823.12	0	0.21	0.73	0.37	0.08	0.08	-0.1	NA	NA	NA	NA	NA	NA	NA
SPAC823.13c	0	-0.16	-0.34	-0.37	-0.16	0.01	-0.15	NA	NA	NA	NA	NA	NA	NA
SPAC823.14	0	-0.19	-0.42	-0.11	-0.12	0.06	-0.13	NA	NA	NA	NA	NA	NA	NA
SPAC823.15	0	0.05	0.26	-0.17	-0.41	0.09	-0.03	NA	NA	NA	NA	NA	NA	NA
SPAC823.16c	0	0.17	0.9	0.93	0.54	0.33	0.9	1	NA	1	1	NA	NA	NA
SPAC824.02	0	0.08	-0.51	-0.39	-0.27	-0.2	0.92	NA	NA	1	NA	NA	NA	NA
SPAC824.03c	0	0.26	0.17	0.02	-0.07	0.02	0.06	NA	NA	NA	NA	NA	NA	NA
SPAC824.04	0	0.13	-0.75	-0.45	0.05	-0.06	-0.11	NA	NA	NA	NA	NA	NA	NA
SPAC824.05	0	-0.04	0.13	-0.05	-0.03	-0.04	0.08	NA	NA	NA	NA	NA	NA	NA
SPAC824.06	0	-0.21	-0.23	-0.09	-0.06	0	0.11	NA	NA	NA	NA	NA	NA	NA
SPAC824.07	0	0.19	1.04	1.25	0.75	0.12	0.37	NA	NA	NA	NA	NA	NA	NA
SPAC824.08	0	-0.17	-0.94	-0.7	-0.1	-0.06	0.47	NA	NA	NA	NA	NA	NA	NA
SPAC824.09c	0	-0.07	-0.02	-0.18	0.22	0.12	0.09	NA	NA	NA	NA	NA	NA	NA
SPAC869.02c	0	-0.2	-0.6	-1.03	-1.68	-0.24	1.51	NA	NA	NA	NA	NA	NA	NA
SPAC869.05c	0	0.12	-0.25	1.17	1.07	1.49	1.19	1	NA	1	NA	NA	NA	NA
SPAC869.06c	0	1.67	5.65	5.58	3.59	0.62	2.6	NA	NA	NA	NA	NA	NA	NA
SPAC869.07c	0	0.64	2.71	3.46	2.34	1.12	2.99	NA	NA	NA	NA	NA	NA	NA
SPAC869.09	0	0.75	4.62	6.29	5.79	2.03	4.42	NA	NA	NA	NA	NA	NA	NA
SPAC869.10c	0	-0.11	-0.35	0.67	-0.91	-1.59	-0.06	NA	NA	NA	NA	NA	NA	NA
SPAC869.11	0	0.01	1.51	1.07	-0.53	-0.52	0.12	NA	NA	NA	NA	NA	NA	NA
SPAC890.02c	0	0.13	0.05	-0.15	0.21	0.01	0	NA	NA	NA	NA	NA	NA	NA
SPAC890.03	0	0.14	0.12	-0.06	-0.02	-0.12	-0.15	NA	NA	NA	NA	NA	NA	NA
SPAC890.04c	0	-0.06	-0.69	-0.83	-0.39	-0.42	-0.89	NA	1	1	NA	NA	NA	NA
SPAC890.05	0	-0.34	-1.06	-1.23	-0.26	-0.03	-0.26	NA	1	1	NA	NA	1	NA
SPAC890.06	0	0.22	0.2	0.3	0.19	0.23	0.1	NA	NA	NA	NA	NA	NA	NA
SPAC890.07c	0	-0.03	-0.49	-0.55	0.01	0.04	-0.29	NA	NA	1	NA	NA	NA	NA
SPAC890.08	0	0.01	-0.27	-0.68	-0.15	0.02	-0.29	NA	1	1	NA	NA	NA	NA
SPAC8C9.03	0	1.6	2.54	1.63	0.94	1.14	1.76	1	NA	1	NA	NA	NA	NA
SPAC8C9.04	0	0.31	0.83	0.76	0.58	0.47	0.67	NA	NA	1	NA	NA	NA	NA
SPAC8C9.05	0	-0.09	-0.19	-0.15	-0.55	-0.54	-0.96	NA	1	1	NA	NA	NA	NA
SPAC8C9.06c	0	0.22	0.44	0.24	0.23	0.12	0.02	NA	NA	NA	NA	NA	NA	NA
SPAC8C9.07	0	0.31	0.02	-0.48	0.17	0.07	0.14	NA	NA	NA	NA	NA	NA	NA
SPAC8C9.08	0	0.06	0.15	0.01	0.06	0.12	0.03	NA	1	1	NA	NA	1	NA
SPAC8C9.09c	0	-0.81	-0.8	-0.59	-0.58	-0.27	-0.62	NA	NA	NA	NA	NA	NA	NA
SPAC8C9.10c	0	-0.03	-0.43	-0.74	-0.48	-0.18	-0.57	NA	NA	1	NA	NA	NA	NA
SPAC8C9.12c	0	-0.22	-0.52	-0.4	-0.15	0.27	-0.51	NA	NA	NA	NA	NA	NA	NA
SPAC8C9.14	0	0.14	1.02	0.38	-0.74	-0.56	-0.17	NA	NA	1	NA	NA	NA	1
SPAC8C9.15c	0	-0.03	-0.85	-1.04	-0.45	-0.28	-0.53	NA	NA	1	NA	NA	1	NA
SPAC8C9.16c	0	1.45	2.13	1.89	0.93	0.34	0.87	1	NA	1	NA	NA	NA	NA
SPAC8C9.17c	0	-0.32	-0.23	0.16	0.16	0.06	0.16	NA	NA	NA	NA	NA	NA	NA
SPAC8E11.01c	0	0.27	0.94	0.75	-0.21	-0.04	-0.39	NA	NA	NA	NA	NA	NA	NA
SPAC8E11.02c	0	0.09	0.45	0.6	0.55	0.34	0.34	NA	NA	NA	NA	NA	NA	NA
SPAC8E11.03c	0	0	0.28	-0.17	-0.09	-0.08	-0.08	NA	NA	NA	NA	NA	NA	NA
SPAC8E11.04c	0	-0.05	-0.07	-0.09	0.11	-0.13	-0.12	NA	NA	NA	NA	NA	NA	NA
SPAC8E11.05c	0	0.19	0.61	0.01	-0.12	-0.02	-0.22	NA	NA	NA	NA	NA	NA	NA
SPAC8E11.07c	0	-0.31	-1.62	-1.88	-1.38	-0.9	-1.39	NA	1	1	NA	NA	NA	NA
SPAC8E11.10	0	-0.51	-3.55	-3.16	-1.62	-0.97	-2.55	NA	1	1	NA	NA	NA	NA
SPAC8F11.02c	0	0	0.5	0.53	-0.07	-0.07	-0.1	NA	NA	NA	NA	NA	NA	NA
SPAC8F11.03	0	-0.33	0.15	-0.01	0.24	0	-0.13	NA	NA	NA	NA	NA	NA	NA
SPAC8F11.04	0	-0.15	-0.96	-1.34	-0.55	-0.13	-0.67	NA	1	1	NA	NA	NA	NA
SPAC8F11.05c	0	-0.17	-0.64	-0.79	-0.01	-0.01	-0.12	1	NA	1	NA	NA	NA	NA
SPAC8F11.06	0	0.01	-0.06	-0.23	0.05	-0.02	0.13	NA	NA	NA	NA	NA	NA	NA
SPAC8F11.07c	0	-0.2	-0.95	-0.41	0.06	0.09	0.05	NA	NA	NA	NA	NA	NA	NA
SPAC8F11.08c	0	0.15	0.29	0.24	-0.19	-0.13	-0.04	NA	NA	NA	NA	NA	NA	NA
SPAC8F11.09c	0	-0.1	-0.54	-0.33	0.02	0.1	-0.41	NA	NA	NA	NA	NA	NA	NA
SPAC8F11.10c	0	-0.43	-1.43	-0.46	0.96	0.81	0.41	NA	NA	NA	NA	NA	NA	NA
SPAC9.02c	0	-0.28	-0.8	-0.98	-0.59	-0.36	-0.93	NA	1	1	NA	NA	NA	NA
SPAC9.03c	0	0.2	0.12	0.48	0.29	0.2	0.26	NA	NA	NA	NA	NA	NA	NA
SPAC9.04	0	-0.41	-0.48	0.09	0.48	0.08	0.3	NA	NA	NA	NA	NA	NA	NA
SPAC9.05	0	-0.24	-0.22	-0.09	0.25	0.27	0.32	NA	NA	NA	NA	NA	NA	NA
SPAC9.06c	0	-0.45	-1.53	-1.22	-0.47	-0.39	-0.57	NA	NA	NA	NA	NA	NA	NA
SPAC9.07c	0	-0.09	-0.24	-0.45	-0.39	-0.34	-0.69	NA	1	1	1	NA	NA	NA
SPAC9.08c	0	0.13	0.07	0.13	0.23	0.38	0.21	NA	NA	NA	NA	NA	NA	NA
SPAC9.09	0	0.06	-0.67	-0.44	0.64	0.47	1.18	NA	NA	NA	NA	NA	NA	NA
SPAC9.10	0	-0.49	-0.46	-0.12	-0.39	-0.17	0.61	NA	NA	NA	NA	NA	NA	NA
SPAC9.11	0	-0.03	-0.18	-0.03	0.12	0.06	0	NA	NA	NA	NA	NA	NA	NA
SPAC9.12c	0	0.11	-0.13	-0.15	-0.03	-0.01	0	NA	NA	NA	1	NA	NA	NA
SPAC9.13c	0	0.43	0.43	0.61	0.59	0.31	0.79	NA	NA	1	NA	NA	NA	NA
SPAC922.03	0	-0.64	-0.22	-0.39	-0.82	-0.46	-0.34	NA	NA	NA	NA	NA	NA	NA
SPAC922.04	0	-0.73	-0.23	-0.41	-1	-0.51	0.09	NA	NA	1	NA	NA	NA	NA
SPAC922.05c	0	-0.31	-0.37	-0.22	-0.87	-0.41	-0.03	NA	NA	NA	1	NA	NA	NA
SPAC922.06	0	-0.44	0	0.15	-0.67	-0.39	0.09	NA	NA	NA	NA	NA	NA	NA
SPAC922.07c	0	-0.33	-0.58	0.36	0.25	0.09	0.75	NA	NA	NA	NA	NA	NA	NA
SPAC926.02	0	-0.22	-0.75	-0.48	0.11	-0.06	-0.22	NA	NA	NA	NA	NA	NA	NA
SPAC926.03	0	-0.06	-0.03	-0.23	0.07	-0.16	-0.15	NA	NA	NA	NA	NA	NA	NA
SPAC926.04c	0	0.15	-1.48	-3.13	-0.27	-0.43	-0.52	NA	NA	NA	NA	NA	NA	NA
SPAC926.05c	0	-0.46	-1.35	-1.35	-1.23	-0.9	-1.38	NA	1	1	NA	NA	NA	NA
SPAC926.06c	0	0.02	-0.25	-0.07	0.13	0.22	0.14	NA	NA	NA	NA	NA	NA	NA
SPAC926.07c	0	-0.15	-0.14	0.37	0.26	0.16	-0.12	NA	NA	NA	NA	NA	NA	NA
SPAC926.08c	0	-0.34	-1.35	-1.43	-0.72	-0.4	-1.09	NA	1	1	NA	NA	1	NA
SPAC926.09c	0	0.36	0.32	0.01	0.18	0.36	0.23	NA	NA	NA	NA	NA	NA	NA
SPAC926.10	0	-0.15	0.26	0.27	0.02	0.16	0.2	NA	NA	NA	NA	NA	NA	NA
SPAC959.02	0	0.13	0.3	0.29	0.21	-0.04	0.03	NA	NA	NA	NA	NA	NA	NA
SPAC959.03c	0	0.01	-0.66	-0.97	-0.42	-0.37	-0.69	NA	1	1	NA	NA	1	NA
SPAC959.04c	0	-0.2	-0.56	-0.01	0.24	0.12	0.08	NA	NA	NA	NA	1	NA	NA
SPAC959.07	0	-0.07	-0.47	-1.05	-0.33	-0.12	-0.49	NA	1	1	NA	NA	1	NA
SPAC959.08	0	0.08	0.04	-0.36	-0.16	-0.15	-0.21	NA	1	1	NA	NA	NA	NA
SPAC959.09c	0	0.09	0.08	0.12	0.42	0.25	0.23	NA	NA	NA	NA	NA	NA	NA
SPAC959.10	0	-0.11	-0.2	0.13	0.23	0.09	-0.12	NA	NA	NA	NA	NA	NA	NA
SPAC977.01	0	0.6	1.53	0.7	-0.81	-0.57	-0.06	NA	NA	NA	NA	NA	NA	NA
SPAC977.10	0	-0.23	0.05	0.21	0.21	0.21	0.45	NA	NA	NA	NA	NA	NA	NA
SPAC977.11	0	-0.23	-0.9	-1.34	-1.11	-0.42	-0.96	NA	NA	NA	NA	NA	NA	NA
SPAC977.12	0	-0.08	-1.52	-1.27	-0.92	0.12	-0.9	NA	1	1	NA	NA	NA	NA
SPAC977.14c	0	0.02	-0.88	-1.91	-0.47	-1.51	-1.34	NA	1	1	NA	NA	NA	NA
SPAC977.15	0	-0.34	-1.08	-1.23	-2.04	-0.82	-0.87	NA	1	1	NA	NA	NA	NA
SPAC977.16c	0	-0.2	2.1	4.84	0.35	-0.28	0.89	NA	NA	NA	NA	NA	NA	NA
SPAC977.17	0	0.13	1.9	3.01	-1.45	-1.23	-0.01	NA	1	1	NA	NA	NA	NA
SPAC9E9.03	0	-0.13	-0.55	-0.12	-0.77	-1.4	-0.03	NA	1	1	NA	NA	NA	NA
SPAC9E9.04	0	0.81	2.65	2.75	0.84	0.61	0.58	NA	NA	1	NA	NA	NA	NA
SPAC9E9.05	0	0.31	0.16	0.62	0.49	0.44	0.52	NA	NA	NA	NA	NA	NA	NA
SPAC9E9.06c	0	0.06	-0.53	-0.56	-0.67	-0.5	-0.7	NA	1	1	NA	NA	NA	NA
SPAC9E9.07c	0	0.15	0.4	0.52	0.41	0.24	0.38	NA	NA	NA	NA	NA	NA	NA
SPAC9E9.08	0	0.04	0.23	0.22	-0.39	-0.19	-0.38	NA	NA	NA	NA	NA	NA	NA
SPAC9E9.09c	0	0.48	1.66	2.29	2.8	1.93	2.07	NA	NA	1	NA	NA	NA	NA
SPAC9E9.10c	0	0.62	1.09	0.14	-0.29	0.2	-0.08	NA	NA	NA	NA	1	NA	NA
SPAC9E9.11	0	0.19	0.53	0.45	1.22	-0.61	-0.65	NA	NA	NA	NA	NA	NA	NA
SPAC9E9.12c	0	-0.13	0.16	-0.14	0.1	-0.25	-0.47	NA	NA	NA	NA	NA	NA	NA
SPAC9E9.13	0	0.1	-0.44	-1.45	-0.33	-0.65	-0.92	NA	NA	NA	NA	NA	NA	NA
SPAC9E9.14	0	0.26	0.37	-0.29	-0.22	-0.24	-0.4	NA	NA	NA	NA	NA	NA	NA
SPAC9E9.15	0	0.94	2.29	2.36	0.93	0.51	0.86	NA	NA	NA	NA	NA	NA	NA
SPAC9G1.02	0	-0.2	-0.2	0.12	0.33	0.22	0.48	NA	NA	NA	NA	NA	NA	NA
[truncated: 2,779 more rows]

## Sheet: cluster 0
S3_1 Table. Cluster 0, functional enrichments.
Data were grouped into clusters as described. Gene group enrichments were determined for each cluster using AnGeLi.
cluster_0	Category_Name	External_ID	GeneSet_Name	over_represented/under_represented	List_Frequency	Background_Frequency	Corrected_pvalue	Genes_In_Common/Interacting_Gene_Pair
SPCC569.01c	GO Biological Process	GO:0071840	cellular component organization or biogenesis	Underrepresented	18.6440677966102 (44/236)	33.5345666991237 (1722/5135)	9.31316e-05	SPCC736.15;SPCC4G3.07C;SPCC1183.04C;SPAC343.06C;SPCC594.06C;SPBC29A10.08;SPCC417.05C;SPAC328.03;SPCC737.05;SPCC830.08C;SPAC19B12.08;SPAC25H1.02;SPBC16C6.14;SPAC57A10.09C;SPAC29A4.17C;SPAC31G5.12C;SPAC3C7.14C;SPBC1198.10C;SPAC21E11.07;SPAC637.13C;SPAC1565.06C;SPAC5D6.07C;SPBC1D7.05;SPBC19G7.08C;SPCC4G3.05C;SPBC1289.06C;SPAC1002.14;SPBC660.07;SPBC1685.13;SPAC25H1.03;SPBC32H8.13C;SPBC4F6.06;SPBC29B5…
SPAC13A11.06	GO Biological Process	GO:0019933	cAMP-mediated signaling	Enriched	2.54237288135593 (6/236)	0.214216163583252 (11/5135)	0.00091732	SPCC285.09C;SPBC32H8.07;SPBC29B5.01;SPBC215.04;SPAC21E11.03C;SPBC106.10
SPAC6G9.14	GO Biological Process	GO:0019935	cyclic-nucleotide-mediated signaling	Enriched	2.54237288135593 (6/236)	0.214216163583252 (11/5135)	0.00091732	SPCC285.09C;SPBC32H8.07;SPBC29B5.01;SPBC215.04;SPAC21E11.03C;SPBC106.10
SPBC29A10.08	GO Biological Process	GO:0070941	eisosome assembly	Enriched	1.69491525423729 (4/236)	0.0778967867575463 (4/5135)	0.00114513	SPCC736.15;SPAC637.13C;SPBC1685.13;SPCC63.14
SPBC21H7.06c	GO Biological Process	GO:0010467	gene expression	Underrepresented	13.9830508474576 (33/236)	26.1927945472249 (1345/5135)	0.00118118	SPAC22F3.09C;SPBC1652.01;SPCC1183.04C;SPBC27B12.05;SPAC3H8.09C;SPAC25B8.19C;SPBC56F2.05C;SPAC19B12.08;SPBC25B2.01;SPAC1F3.09;SPAC57A10.09C;SPBC530.11C;SPAC31G5.12C;SPAC3C7.14C;SPBC1198.10C;SPCC1223.13;SPBC32H8.07;SPBC16G5.16;SPCC830.07C;SPCC31H12.08C;SPAC1399.05C;SPBC1289.06C;SPAC1002.14;SPBC29B5.01;SPBC15D4.02;SPAC23A1.16C;SPAC8C9.14;SPAC2E12.02;SPBC13E7.02;SPBC215.04;SPAC3H5.04;SPAC21E11.03C;SP…
SPCP20C8.01c	GO Biological Process	GO:0005984	disaccharide metabolic process	Enriched	2.54237288135593 (6/236)	0.233690360272639 (12/5135)	0.00154382	SPAC8E11.01C;SPAC328.03;SPBC1683.07;SPAC19G12.15C;SPBC660.07;SPACUNK4.16C
SPAC1A6.06c	GO Biological Process	GO:0009605	response to external stimulus	Enriched	5.93220338983051 (14/236)	1.57740993184031 (81/5135)	0.00268863	SPBC1652.01;SPAC25B8.19C;SPAC19B12.08;SPCC285.09C;SPCC63.08C;SPBC32H8.07;SPBC1D7.05;SPAC25H1.03;SPBC29B5.01;SPBC3B9.06C;SPBC215.04;SPCC24B10.07;SPAC21E11.03C;SPBC106.10
SPCC162.02c	GO Biological Process	GO:0009991	response to extracellular stimulus	Enriched	5.93220338983051 (14/236)	1.57740993184031 (81/5135)	0.00268863	SPBC1652.01;SPAC25B8.19C;SPAC19B12.08;SPCC285.09C;SPCC63.08C;SPBC32H8.07;SPBC1D7.05;SPAC25H1.03;SPBC29B5.01;SPBC3B9.06C;SPBC215.04;SPCC24B10.07;SPAC21E11.03C;SPBC106.10
SPAC139.04c	GO Biological Process	GO:0031667	response to nutrient levels	Enriched	5.93220338983051 (14/236)	1.57740993184031 (81/5135)	0.00268863	SPBC1652.01;SPAC25B8.19C;SPAC19B12.08;SPCC285.09C;SPCC63.08C;SPBC32H8.07;SPBC1D7.05;SPAC25H1.03;SPBC29B5.01;SPBC3B9.06C;SPBC215.04;SPCC24B10.07;SPAC21E11.03C;SPBC106.10
SPAC23C4.05c	GO Biological Process	GO:0031668	cellular response to extracellular stimulus	Enriched	5.93220338983051 (14/236)	1.57740993184031 (81/5135)	0.00268863	SPBC1652.01;SPAC25B8.19C;SPAC19B12.08;SPCC285.09C;SPCC63.08C;SPBC32H8.07;SPBC1D7.05;SPAC25H1.03;SPBC29B5.01;SPBC3B9.06C;SPBC215.04;SPCC24B10.07;SPAC21E11.03C;SPBC106.10
SPAC1F3.09	GO Biological Process	GO:0031669	cellular response to nutrient levels	Enriched	5.93220338983051 (14/236)	1.57740993184031 (81/5135)	0.00268863	SPBC1652.01;SPAC25B8.19C;SPAC19B12.08;SPCC285.09C;SPCC63.08C;SPBC32H8.07;SPBC1D7.05;SPAC25H1.03;SPBC29B5.01;SPBC3B9.06C;SPBC215.04;SPCC24B10.07;SPAC21E11.03C;SPBC106.10
SPBC30D10.14	GO Biological Process	GO:0071496	cellular response to external stimulus	Enriched	5.93220338983051 (14/236)	1.57740993184031 (81/5135)	0.00268863	SPBC1652.01;SPAC25B8.19C;SPAC19B12.08;SPCC285.09C;SPCC63.08C;SPBC32H8.07;SPBC1D7.05;SPAC25H1.03;SPBC29B5.01;SPBC3B9.06C;SPBC215.04;SPCC24B10.07;SPAC21E11.03C;SPBC106.10
SPBC13E7.02	GO Biological Process	GO:0043170	macromolecule metabolic process	Underrepresented	31.7796610169492 (75/236)	45.2580331061344 (2324/5135)	0.00301888	SPAC15E1.10;SPAC22F3.09C;SPAC26H5.04;SPBC1652.01;SPCC4G3.07C;SPCC1183.04C;SPBC1778.10C;SPCC417.05C;SPBC27B12.05;SPAC3H8.09C;SPAC30D11.07;SPAC19B12.10;SPBC56F2.05C;SPAC25B8.19C;SPAC19B12.08;SPAC25H1.02;SPAC8C9.03;SPBC20F10.10;SPAC10F6.05C;SPBC25B2.01;SPAC1F3.09;SPBC17D11.01;SPAC57A10.09C;SPBC16A3.09C;SPBC530.11C;SPAC31G5.12C;SPAC25H1.04;SPAC3C7.14C;SPBC16E9.13;SPBC12D12.02C;SPCC1223.13;SPBC14F5.10…
SPAC823.03	GO Biological Process	GO:0051276	chromosome organization	Underrepresented	2.54237288135593 (6/236)	9.50340798442064 (488/5135)	0.00509262	SPCC4G3.07C;SPAC25H1.02;SPAC57A10.09C;SPAC3C7.14C;SPBC29B5.01;SPAC21E11.03C
SPBC4F6.06	GO Biological Process	GO:0009743	response to carbohydrate	Enriched	2.11864406779661 (5/236)	0.194741966893866 (10/5135)	0.00579969	SPCC285.09C;SPBC32H8.07;SPBC660.07;SPBC215.04;SPBC106.10
SPBC26H8.14c	GO Biological Process	GO:0009987	cellular process	Underrepresented	65.2542372881356 (154/236)	76.7478091528724 (3941/5135)	0.00702422	SPAC15E1.10;SPBC3E7.16C;SPAC11D3.08C;SPBC365.20C;SPAC22F3.09C;SPAC1A6.03C;SPAC26H5.04;SPCC736.15;SPAC26H5.09C;SPBC1652.01;SPAC13A11.06;SPCC1183.11;SPAC664.09;SPCC4G3.07C;SPCC1183.04C;SPBC4B4.08;SPBC1778.10C;SPAC343.06C;SPCC594.06C;SPBC29A10.08;SPCC417.05C;SPAC29E6.07;SPAC8E11.01C;SPBC27B12.05;SPAC3H8.09C;SPAC328.03;SPCC1529.01;SPCC737.05;SPAC30D11.07;SPBC1683.01;SPAC19B12.10;SPBC56F2.05C;SPAC25B8…
SPCC285.09c	GO Biological Process	GO:0019932	second-messenger-mediated signaling	Enriched	2.96610169491525 (7/236)	0.447906523855891 (23/5135)	0.00703187	SPCC285.09C;SPBC32H8.07;SPBC29B5.01;SPBC215.04;SPCC576.04;SPAC21E11.03C;SPBC106.10
SPCC1223.13	GO Biological Process	GO:0044260	cellular macromolecule metabolic process	Underrepresented	31.3559322033898 (74/236)	43.8948393378773 (2254/5135)	0.00875735	SPAC15E1.10;SPAC22F3.09C;SPAC26H5.04;SPBC1652.01;SPCC4G3.07C;SPCC1183.04C;SPBC1778.10C;SPCC417.05C;SPBC27B12.05;SPAC3H8.09C;SPAC30D11.07;SPAC19B12.10;SPBC56F2.05C;SPAC25B8.19C;SPAC25H1.02;SPAC8C9.03;SPBC20F10.10;SPAC10F6.05C;SPBC25B2.01;SPAC1F3.09;SPBC17D11.01;SPAC57A10.09C;SPBC16A3.09C;SPBC530.11C;SPAC31G5.12C;SPAC25H1.04;SPAC3C7.14C;SPBC16E9.13;SPBC12D12.02C;SPCC1223.13;SPBC14F5.10C;SPBC1198.10…
SPBC3B8.07c	Gene Expression		Core Environmental Stress Response induced	Enriched	55.5084745762712 (131/236)	10.4381694255112 (536/5135)	6.13648e-67	SPAC15E1.10;SPBC713.11C;SPAC11D3.08C;SPBC365.20C;SPAC22F3.09C;SPAC26H5.04;SPCC736.15;SPBC409.17C;SPAC2F3.05C;SPCC1183.11;SPAC26F1.07;SPCC594.04C;SPBC1778.10C;SPAC343.06C;SPCC594.06C;SPCC417.05C;SPAPB24D3.08C;SPBC83.16C;SPAC3H8.09C;SPBC428.10;SPAC328.03;SPAC1A6.07;SPAC3A11.06;SPAC19B12.10;SPCC1739.04C;SPCC830.08C;SPAC26F1.04C;SPAC19B12.08;SPAC25H1.02;SPAC8C9.03;SPBC20F10.10;SPAC212.04C;SPAC227.03C…
SPBC32H8.13c	Gene Expression		Oxidative Stess Cluster 4	Enriched	45.7627118644068 (108/236)	8.00389483933788 (411/5135)	6.81873e-56	SPAC15E1.10;SPBC713.11C;SPAC11D3.08C;SPBC365.20C;SPAC22F3.09C;SPAC26H5.04;SPCC736.15;SPBC409.17C;SPAC2F3.05C;SPAC26F1.07;SPCC594.04C;SPBC1778.10C;SPAC343.06C;SPCC594.06C;SPCC417.05C;SPBC83.16C;SPBC428.10;SPAC328.03;SPAC1A6.07;SPAC3A11.06;SPAC19B12.10;SPCC1739.04C;SPCC830.08C;SPAC26F1.04C;SPAC19B12.08;SPAC25H1.02;SPAC8C9.03;SPBC20F10.10;SPAC212.04C;SPAC227.03C;SPAPB2B4.04C;SPBC713.07C;SPBC25B2.01;…
SPAPB2B4.01c	Gene Expression		Stress module	Enriched	16.5254237288136 (39/236)	2.62901655306719 (135/5135)	1.73886e-18	SPCC736.15;SPAC2F3.05C;SPAC26F1.07;SPCC594.04C;SPAC343.06C;SPCC417.05C;SPBC428.10;SPAC328.03;SPAC3A11.06;SPAC26F1.04C;SPAC8C9.03;SPBC30D10.14;SPAC9E9.04;SPAC1687.14C;SPCC4F11.02;SPBC215.05;SPCC24B10.02C;SPAC5D6.07C;SPBC21H7.06C;SPBC32H8.07;SPBC660.06;SPCC830.07C;SPBC106.02C;SPCC320.05;SPBC12C2.04;SPAC23C4.05C;SPBC1105.13C;SPBC660.07;SPAC25H1.03;SPAC16A10.01;SPACUNK4.16C;SPCC63.14;SPAC4G9.11C;SPAC…
SPCP1E11.05c	Gene Expression		Induced zfs1 mutant	Enriched	11.4406779661017 (27/236)	1.34371957156767 (69/5135)	5.46922e-16	SPAC15E1.10;SPAC1A6.03C;SPCC736.15;SPBC4B4.08;SPAC343.06C;SPBC428.10;SPCC1739.04C;SPAC10F6.05C;SPAC227.03C;SPCC4B3.13;SPAPB24D3.07C;SPBC17D11.01;SPAC8C9.16C;SPAC3C7.14C;SPCC1235.03;SPCC1494.03;SPCC4G3.05C;SPBC649.04;SPBC947.04;SPAC1B3.11C;SPAC19G12.15C;SPBC577.13;SPCC794.12C;SPBC1685.13;SPAC31A2.12;SPAC4F8.10C;SPCC63.14
SPAC1002.14	Gene Expression		Sty1 but not Atf1 activated genes	Enriched	8.47457627118644 (20/236)	0.68159688412853 (35/5135)	1.78673e-15	SPCC1183.11;SPCC417.05C;SPAC328.03;SPAC8C9.03;SPAC57A10.09C;SPCC4F11.02;SPBC21H7.06C;SPBC660.06;SPBC725.02;SPBC12C2.04;SPAC823.03;SPBC660.07;SPBC29B5.01;SPAC16A10.01;SPAC11E3.14;SPCC63.14;SPACUNK4.15;SPAC21E11.03C;SPAC607.08C;SPBC106.10
SPAC13G7.05	Gene Expression		Sporulation module	Enriched	13.9830508474576 (33/236)	3.58325219084713 (184/5135)	2.64997e-09	SPAC15E1.10;SPAC26H5.04;SPBC409.17C;SPAC13A11.06;SPCC594.04C;SPAPB24D3.08C;SPCC830.08C;SPAC25H1.02;SPCC1259.08;SPCC794.02;SPAC8C9.03;SPAC212.04C;SPBC30D10.14;SPCC736.05;SPAP14E8.05C;SPBC12D12.02C;SPBC14F5.10C;SPBC3B8.07C;SPBPB2B2.02;SPAC212.01C;SPCC1183.10;SPAC17G6.13;SPBC106.02C;SPCC663.06C;SPBC25B2.03;SPBC32H8.13C;SPAPB1A10.08;SPBC609.01;SPBC19C7.09C;SPCC16A11.01;SPAC4G9.11C;SPBC215.04;SPAC328.…
SPBC20F10.10	Gene Expression		Late meiotic genes	Enriched	11.864406779661 (28/236)	2.64849074975657 (136/5135)	3.6941e-09	SPAC15E1.10;SPBC409.17C;SPAC13A11.06;SPCC594.04C;SPAC3H8.09C;SPCC830.08C;SPAC8C9.03;SPAC750.05C;SPCC736.05;SPAC31G5.12C;SPAP14E8.05C;SPBC12D12.02C;SPBC14F5.10C;SPCC1235.03;SPCC1494.03;SPBC725.02;SPBPB2B2.19C;SPAC977.01;SPBC25B2.03;SPBC32H8.13C;SPAPB1A10.08;SPBC609.01;SPBC19C7.09C;SPCC16A11.01;SPBC215.04;SPAC328.04;SPBC947.09;SPBC106.10
SPAP14E8.05c	Gene Expression		Zfs1 RNA targets	Enriched	11.0169491525424 (26/236)	2.6095423563778 (134/5135)	7.87849e-08	SPCC736.15;SPBC428.10;SPCC1529.01;SPCC794.02;SPBC20F10.10;SPCC4B3.13;SPBC17D11.01;SPCC1223.13;SPCC1235.03;SPCC1494.03;SPAC21E11.07;SPCC1183.10;SPCC320.05;SPBC649.04;SPAC32A11.01;SPBP35G2.02;SPBC1685.13;SPAC31A2.12;SPAC1687.07;SPAPB1A10.08;SPAC16A10.01;SPBC215.04;SPAC328.04;SPCC24B10.07;SPCC576.04;SPBC106.10
SPBC16E9.13	Gene Expression		Core Environmental Stress Response repressed	Underrepresented	0.847457627118644 (2/236)	8.5491723466407 (439/5135)	8.52276e-05	SPBC1683.01;SPBC947.04
SPBC1778.10c	Gene Expression		Cell Cycle Cluster 4	Enriched	9.74576271186441 (23/236)	3.05744888023369 (157/5135)	0.000169281	SPCC1183.11;SPAC26F1.07;SPCC594.04C;SPBC29A10.08;SPCC417.05C;SPBC428.10;SPAC1002.17C;SPAC9E9.04;SPCC548.06C;SPAC57A10.09C;SPAC31G5.12C;SPAC637.13C;SPBC660.06;SPAC6B12.07C;SPBC649.04;SPBC17D11.08;SPAC823.03;SPCC18.04;SPACUNK4.15;SPCC1494.08C;SPAC821.03C;SPAC21E11.03C;SPBC106.10
SPAC23G3.03	Gene Expression		Atf1 activated	Enriched	5.08474576271187 (12/236)	1.28529698149951 (66/5135)	0.00552785	SPCC736.15;SPAC2F3.05C;SPAC26F1.07;SPAPB24D3.08C;SPBC428.10;SPAC26F1.04C;SPBC30D10.14;SPAC9E9.04;SPBC215.05;SPBC2A9.02;SPBC32H8.07;SPBC106.02C
SPBC83.16c	Gene Expression		Oxidative Stess Cluster 8	Enriched	7.20338983050847 (17/236)	2.39532619279455 (123/5135)	0.00578477	SPAC26H5.09C;SPAPB24D3.08C;SPAC3C7.14C;SPCC1223.13;SPBC2A9.02;SPBC1683.07;SPBC106.02C;SPCC4G3.05C;SPAC11D3.05;SPBC1289.06C;SPAC1B3.11C;SPCC663.06C;SPAC1002.14;SPBC1773.13;SPAC8C9.14;SPAC3H5.04;SPCC31H12.02C
SPAC11D3.05	Gene Expression		Atf31 targets	Enriched	5.50847457627119 (13/236)	1.57740993184031 (81/5135)	0.00873434	SPBC409.17C;SPAC13A11.06;SPCC594.04C;SPAPB24D3.08C;SPBC30D10.14;SPCC736.05;SPBC3B8.07C;SPCC1183.10;SPCC663.06C;SPBC32H8.13C;SPAPB1A10.08;SPBC609.01;SPCC16A11.01
SPAC212.04c	Gene Features		Intron-containing genes	Underrepresented	35.5932203389831 (84/236)	48.8412852969815 (2508/5135)	0.00509262	SPBC713.11C;SPAC22F3.09C;SPAC1399.05C;SPCC4G3.05C;SPAC26H5.09C;SPAC6G9.14;SPBC649.04;SPBC17D11.08;SPBC1289.06C;SPAC22H10.02;SPAC1B3.11C;SPCC584.15C;SPAC32A11.01;SPCC1183.04C;SPBC1778.10C;SPCC594.06C;SPBC27B12.05;SPAC3H8.09C;SPAC1639.01C;SPBP35G2.02;SPAC823.03;SPBC26H8.13C;SPAC23C4.05C;SPBC26H8.05C;SPCC1529.01;SPBC577.13;SPBC25B2.03;SPAC3A11.06;SPAC212.06C;SPAC19B12.10;SPCC1739.04C;SPCC830.08C;SPA…
SPBC3E7.16c	Gene Features		Intron-less genes	Enriched	64.4067796610169 (152/236)	51.1587147030185 (2627/5135)	0.00509262	SPAC15E1.10;SPBC3E7.16C;SPAC11D3.08C;SPBC365.20C;SPAC1A6.03C;SPAC26H5.04;SPCC306.11;SPCC736.15;SPBC1652.01;SPBC409.17C;SPAC2F3.05C;SPCC70.10;SPAC13A11.06;SPCC1183.11;SPAC26F1.07;SPAC664.09;SPAC186.05C;SPCC4G3.07C;SPBC4B4.08;SPCC594.04C;SPAC343.06C;SPBC29A10.08;SPCC417.05C;SPAC29E6.07;SPAC25B8.12C;SPAPB24D3.08C;SPAC8E11.01C;SPBC83.16C;SPBC428.10;SPAC328.03;SPCC16C4.02C;SPAC1A6.07;SPCC737.05;SPAC30…
SPBC713.07c	Phenotypes (FYPO)	FYPO:0002177	viable vegetative cell with normal cell morphology	Enriched	85.5932203389831 (202/236)	60.2921129503408 (3096/5135)	5.53667e-15	SPAC15E1.10;SPBC713.11C;SPBC3E7.16C;SPAC11D3.08C;SPBC365.20C;SPAC22F3.09C;SPAC1A6.03C;SPAC26H5.04;SPCC306.11;SPCC736.15;SPAC26H5.09C;SPBC1652.01;SPBC409.17C;SPAC2F3.05C;SPCC70.10;SPAC13A11.06;SPCC1183.11;SPAC26F1.07;SPAC186.05C;SPCC1183.04C;SPBC4B4.08;SPCC594.04C;SPBC1778.10C;SPAC343.06C;SPCC594.06C;SPBC29A10.08;SPCC417.05C;SPAC29E6.07;SPAPB24D3.08C;SPAC8E11.01C;SPBC83.16C;SPBC27B12.05;SPAC3H8.09…
SPAC19G12.15c	Phenotypes (FYPO)	FYPO:0000124	viable cell	Enriched	92.3728813559322 (218/236)	70.8471275559883 (3638/5135)	1.03855e-13	SPAC15E1.10;SPBC713.11C;SPBC3E7.16C;SPAC11D3.08C;SPBC365.20C;SPAC22F3.09C;SPAC1A6.03C;SPAC26H5.04;SPCC306.11;SPCC736.15;SPAC26H5.09C;SPBC1652.01;SPBC409.17C;SPAC2F3.05C;SPCC70.10;SPAC13A11.06;SPCC1183.11;SPAC26F1.07;SPAC186.05C;SPCC1183.04C;SPBC4B4.08;SPCC594.04C;SPBC1778.10C;SPAC343.06C;SPCC594.06C;SPBC29A10.08;SPCC417.05C;SPAC29E6.07;SPAPB24D3.08C;SPAC8E11.01C;SPBC83.16C;SPBC27B12.05;SPAC3H8.09…
SPAC2F3.05c	Phenotypes (FYPO)	FYPO:0001491	viable vegetative cell	Enriched	92.3728813559322 (218/236)	70.8471275559883 (3638/5135)	1.03855e-13	SPAC15E1.10;SPBC713.11C;SPBC3E7.16C;SPAC11D3.08C;SPBC365.20C;SPAC22F3.09C;SPAC1A6.03C;SPAC26H5.04;SPCC306.11;SPCC736.15;SPAC26H5.09C;SPBC1652.01;SPBC409.17C;SPAC2F3.05C;SPCC70.10;SPAC13A11.06;SPCC1183.11;SPAC26F1.07;SPAC186.05C;SPCC1183.04C;SPBC4B4.08;SPCC594.04C;SPBC1778.10C;SPAC343.06C;SPCC594.06C;SPBC29A10.08;SPCC417.05C;SPAC29E6.07;SPAPB24D3.08C;SPAC8E11.01C;SPBC83.16C;SPBC27B12.05;SPAC3H8.09…
SPBC947.09	Phenotypes (FYPO)	FYPO:0002060	viable vegetative cell population	Enriched	94.0677966101695 (222/236)	74.0214216163583 (3801/5135)	3.58496e-13	SPAC15E1.10;SPBC713.11C;SPBC3E7.16C;SPAC11D3.08C;SPBC365.20C;SPAC22F3.09C;SPAC1A6.03C;SPAC26H5.04;SPCC306.11;SPCC736.15;SPAC26H5.09C;SPBC1652.01;SPBC409.17C;SPAC2F3.05C;SPCC70.10;SPAC13A11.06;SPCC1183.11;SPAC26F1.07;SPAC186.05C;SPCC1183.04C;SPBC4B4.08;SPCC594.04C;SPBC1778.10C;SPAC343.06C;SPCC594.06C;SPBC29A10.08;SPCC417.05C;SPAC29E6.07;SPAC25B8.12C;SPAPB24D3.08C;SPAC8E11.01C;SPBC83.16C;SPBC27B12.…
SPAC57A7.09	Phenotypes (FYPO)	FYPO:0002061	inviable vegetative cell population	Underrepresented	8.05084745762712 (19/236)	27.9844206426485 (1437/5135)	1.09268e-11	SPAC664.09;SPCC4G3.07C;SPAC343.06C;SPCC16C4.02C;SPAC227.03C;SPBC16A3.09C;SPBC1198.10C;SPAC21E11.07;SPAC1565.06C;SPBC16C6.02C;SPBPB7E8.02;SPCC18.04;SPBC29B5.01;SPBC15D4.02;SPBC609.01;SPAC23A1.16C;SPAPB2B4.01C;SPAC2E12.02;SPBC13E7.02
SPBC19G7.08c	Phenotypes (FYPO)	FYPO:0002058	viable cell population	Enriched	94.0677966101695 (222/236)	75.6377799415774 (3884/5135)	2.23367e-11	SPAC15E1.10;SPBC713.11C;SPBC3E7.16C;SPAC11D3.08C;SPBC365.20C;SPAC22F3.09C;SPAC1A6.03C;SPAC26H5.04;SPCC306.11;SPCC736.15;SPAC26H5.09C;SPBC1652.01;SPBC409.17C;SPAC2F3.05C;SPCC70.10;SPAC13A11.06;SPCC1183.11;SPAC26F1.07;SPAC186.05C;SPCC1183.04C;SPBC4B4.08;SPCC594.04C;SPBC1778.10C;SPAC343.06C;SPCC594.06C;SPBC29A10.08;SPCC417.05C;SPAC29E6.07;SPAC25B8.12C;SPAPB24D3.08C;SPAC8E11.01C;SPBC83.16C;SPBC27B12.…
SPBC16G5.16	Phenotypes (FYPO)	FYPO:0002059	inviable cell population	Underrepresented	8.47457627118644 (20/236)	28.1986368062317 (1448/5135)	2.23367e-11	SPAC664.09;SPCC4G3.07C;SPAC343.06C;SPCC16C4.02C;SPAC227.03C;SPBC16A3.09C;SPBC1198.10C;SPAC21E11.07;SPAC1565.06C;SPBC16C6.02C;SPCC4G3.05C;SPBPB7E8.02;SPCC18.04;SPBC29B5.01;SPBC15D4.02;SPBC609.01;SPAC23A1.16C;SPAPB2B4.01C;SPAC2E12.02;SPBC13E7.02
SPBC577.13	Phenotypes (FYPO)	FYPO:0000049	inviable cell	Underrepresented	9.74576271186441 (23/236)	28.8607594936709 (1482/5135)	3.12769e-10	SPAC664.09;SPCC4G3.07C;SPAC328.03;SPCC16C4.02C;SPBC16A3.09C;SPCC1223.13;SPBC1198.10C;SPAC21E11.07;SPAC1565.06C;SPBC19G7.08C;SPCC31H12.08C;SPCC4G3.05C;SPBP35G2.02;SPCC794.12C;SPCC18.04;SPBC609.01;SPAC23A1.16C;SPAPB2B4.01C;SPAC2E12.02;SPBC13E7.02;SPAC821.03C;SPAC328.02;SPAC607.09C
SPCC306.11	Phenotypes (FYPO)	FYPO:0001489	inviable vegetative cell	Underrepresented	8.47457627118644 (20/236)	25.9591041869523 (1333/5135)	2.64997e-09	SPAC664.09;SPCC4G3.07C;SPCC16C4.02C;SPBC16A3.09C;SPCC1223.13;SPBC1198.10C;SPAC21E11.07;SPAC1565.06C;SPBC19G7.08C;SPCC31H12.08C;SPBP35G2.02;SPCC794.12C;SPCC18.04;SPBC609.01;SPAC23A1.16C;SPAPB2B4.01C;SPBC13E7.02;SPAC821.03C;SPAC328.02;SPAC607.09C
SPAC9E9.04	Phenotypes (FYPO)	FYPO:0000316	inviable after spore germination	Underrepresented	3.8135593220339 (9/236)	15.6572541382668 (804/5135)	2.51819e-06	SPCC4G3.07C;SPCC16C4.02C;SPBC16A3.09C;SPAC1565.06C;SPCC18.04;SPBC609.01;SPAC23A1.16C;SPAPB2B4.01C;SPBC13E7.02
SPAC22H10.02	Phenotypes (FYPO)	FYPO:0002451	inviable vegetative cell with abnormal cell shape	Underrepresented	3.8135593220339 (9/236)	14.6835443037975 (754/5135)	1.66638e-05	SPAC664.09;SPCC4G3.07C;SPCC16C4.02C;SPBC1198.10C;SPAC21E11.07;SPAC1565.06C;SPAC23A1.16C;SPAC821.03C;SPAC607.09C
SPBC1348.01	Phenotypes (FYPO)	FYPO:0001490	inviable elongated vegetative cell	Underrepresented	1.27118644067797 (3/236)	7.8286270691334 (402/5135)	0.00213303	SPCC16C4.02C;SPAC1565.06C;SPAC23A1.16C
SPAC16A10.01	Phenotypes (FYPO)	FYPO:0001126	abnormal cell shape	Underrepresented	16.9491525423729 (40/236)	29.269717624148 (1503/5135)	0.00221195	SPAC22F3.09C;SPAC664.09;SPCC4G3.07C;SPAC3H8.09C;SPCC16C4.02C;SPAC30D11.07;SPAC19B12.10;SPAC8C9.03;SPBC1198.10C;SPCC1223.13;SPCC285.09C;SPBC215.05;SPAC21E11.07;SPAC1565.06C;SPBC17D1.17;SPBC725.02;SPCP1E11.05C;SPCC31H12.08C;SPAC1399.05C;SPCC4G3.05C;SPAC977.01;SPAC6G9.14;SPBC947.04;SPCC663.06C;SPCC794.12C;SPCC970.06;SPBC4F6.06;SPBC29B5.01;SPBC2F12.15C;SPBC15D4.02;SPAC4F8.10C;SPAC23A1.16C;SPAC8C9.14;…
SPBC1773.13	Phenotypes (FYPO)	FYPO:0001446	altered cellular trehalose level	Enriched	1.69491525423729 (4/236)	0.0973709834469328 (5/5135)	0.00363721	SPAC328.03;SPAC19G12.15C;SPBC660.07;SPBC106.10
SPBC405.04c	Phenotypes (FYPO)	FYPO:0001991	inviable after spore germination, without cell division	Underrepresented	2.54237288135593 (6/236)	9.58130477117819 (492/5135)	0.00385412	SPCC4G3.07C;SPAC1565.06C;SPCC18.04;SPBC609.01;SPAC23A1.16C;SPBC13E7.02
SPBC106.10	Phenotypes (FYPO)	FYPO:0000005	abnormal cell morphology	Underrepresented	19.4915254237288 (46/236)	31.4508276533593 (1615/5135)	0.00483695	SPAC22F3.09C;SPAC664.09;SPCC4G3.07C;SPAC3H8.09C;SPCC16C4.02C;SPAC30D11.07;SPAC19B12.10;SPAC25B8.19C;SPAC8C9.03;SPBC16A3.09C;SPBC1198.10C;SPCC1223.13;SPCC285.09C;SPBC215.05;SPAC21E11.07;SPAC1565.06C;SPBC32H8.07;SPBC17D1.17;SPBC725.02;SPCP1E11.05C;SPCC31H12.08C;SPAC1399.05C;SPCC4G3.05C;SPAC977.01;SPAC6G9.14;SPBC947.04;SPCC663.06C;SPCC794.12C;SPCC970.06;SPAC25H1.03;SPBC4F6.06;SPBC29B5.01;SPBC2F12.15…
SPCC830.08c	Phenotypes (FYPO)	FYPO:0001358	vegetative cell population growth phenotype	Enriched	59.3220338983051 (140/236)	46.5238558909445 (2389/5135)	0.00774267	SPBC713.11C;SPAC22F3.09C;SPAC26H5.04;SPCC306.11;SPAC26H5.09C;SPBC1652.01;SPAC2F3.05C;SPCC1183.11;SPAC664.09;SPAC186.05C;SPBC4B4.08;SPCC594.04C;SPBC1778.10C;SPCC594.06C;SPCC417.05C;SPAC29E6.07;SPAPB24D3.08C;SPBC83.16C;SPAC3H8.09C;SPBC428.10;SPAC328.03;SPAC30D11.07;SPAC19B12.10;SPBC56F2.05C;SPAC25B8.19C;SPAC26F1.04C;SPAC19B12.08;SPAC25H1.02;SPCC1259.08;SPAC8C9.03;SPBC20F10.10;SPAC212.04C;SPBC30D10.…
SPBC1D7.05	Phenotypes (FYPO)	FYPO:0001480	normal alpha,alpha-trehalase activity	Enriched	1.69491525423729 (4/236)	0.116845180136319 (6/5135)	0.00797877	SPAC328.03;SPBC660.07;SPBC29B5.01;SPBC106.10
SPBPB2B2.19c	Phenotypes (FYPO)	FYPO:0000139	cell population growth phenotype	Enriched	59.3220338983051 (140/236)	46.5628042843233 (2391/5135)	0.00921043	SPBC713.11C;SPAC22F3.09C;SPAC26H5.04;SPCC306.11;SPAC26H5.09C;SPBC1652.01;SPAC2F3.05C;SPCC1183.11;SPAC664.09;SPAC186.05C;SPBC4B4.08;SPCC594.04C;SPBC1778.10C;SPCC594.06C;SPCC417.05C;SPAC29E6.07;SPAPB24D3.08C;SPBC83.16C;SPAC3H8.09C;SPBC428.10;SPAC328.03;SPAC30D11.07;SPAC19B12.10;SPBC56F2.05C;SPAC25B8.19C;SPAC26F1.04C;SPAC19B12.08;SPAC25H1.02;SPCC1259.08;SPAC8C9.03;SPBC20F10.10;SPAC212.04C;SPBC30D10.…
SPAC11E3.14	Protein Domains (Pfam)	PF06198	Protein of unknown function (DUF999)	Enriched	2.11864406779661 (5/236)	0.194741966893866 (10/5135)	0.00579969	SPAC212.04C;SPBC1348.01;SPAC212.01C;SPBCPT2R1.04C;SPAC750.06C
SPAC1565.06c	Protein Features		Lysine	Lower	0.0574998	0.0684338	7.0147e-08	SPAC212.01C;SPAC11D3.08C;SPAC1639.01C;SPAC13C5.06C;SPAC23G3.03;SPAC3A12.06C;SPAC5D6.07C;SPAC1399.05C;SPAC6B12.07C;SPAC32A11.01;SPAC6G9.14;SPAC328.03;SPAC2F3.05C;SPAC11E3.14;SPAC31A2.12;SPAC4G8.03C;SPAC22H12.01C;SPAC57A10.09C;SPAC607.09C;SPAC3C7.14C;SPAC13G7.05;SPAP32A8.02;SPAC8C9.03;SPAC26H5.04;SPAC683.03;SPAC9E9.04;SPAC19B12.10;SPAC1751.01C;SPAC13A11.06;SPAC139.04C;SPAC1A6.03C;SPAC1A6.06C;SPAPB2…
SPAPB1A10.07c	Protein Features		Homo sapiens orthologs	Underrepresented	48.3050847457627 (114/236)	66.095423563778 (3394/5135)	4.43232e-06	SPAC15E1.10;SPAC1A6.03C;SPAC26H5.04;SPAC26H5.09C;SPAC664.09;SPAC186.05C;SPCC4G3.07C;SPBC1778.10C;SPAC343.06C;SPCC594.06C;SPAPB24D3.08C;SPBC83.16C;SPCC16C4.02C;SPAC30D11.07;SPAC3A11.06;SPAC19B12.10;SPCC830.08C;SPAC26F1.04C;SPAC9E9.15;SPAC19B12.08;SPAC1002.17C;SPAC25H1.02;SPAC23A1.15C;SPAC8C9.03;SPBC20F10.10;SPAC10F6.05C;SPCC4B3.13;SPAPB2B4.04C;SPBC713.07C;SPBC25B2.01;SPAC750.08C;SPAC9E9.04;SPBC17D…
SPCC63.14	Protein Features		Nitrogen content	Lower	1.34212	1.36688	0.00091732	SPAC212.01C;SPAC11D3.08C;SPAC1639.01C;SPAC13C5.06C;SPAC23G3.03;SPAC3A12.06C;SPAC5D6.07C;SPAC1399.05C;SPAC6B12.07C;SPAC32A11.01;SPAC6G9.14;SPAC328.03;SPAC2F3.05C;SPAC11E3.14;SPAC31A2.12;SPAC4G8.03C;SPAC22H12.01C;SPAC57A10.09C;SPAC607.09C;SPAC3C7.14C;SPAC13G7.05;SPAP32A8.02;SPAC8C9.03;SPAC26H5.04;SPAC683.03;SPAC9E9.04;SPAC19B12.10;SPAC1751.01C;SPAC13A11.06;SPAC139.04C;SPAC1A6.03C;SPAC1A6.06C;SPAPB2…
SPAC3H5.04	Protein Features		S.cerevisiae orthologs	Underrepresented	63.5593220338983 (150/236)	76.0662122687439 (3906/5135)	0.00229555	SPAC15E1.10;SPBC713.11C;SPBC3E7.16C;SPAC11D3.08C;SPBC365.20C;SPAC22F3.09C;SPAC1A6.03C;SPAC26H5.04;SPCC736.15;SPAC26H5.09C;SPBC1652.01;SPAC2F3.05C;SPAC13A11.06;SPAC26F1.07;SPAC664.09;SPAC186.05C;SPCC1183.04C;SPBC4B4.08;SPBC1778.10C;SPAC343.06C;SPCC594.06C;SPBC29A10.08;SPCC417.05C;SPAPB24D3.08C;SPAC8E11.01C;SPBC83.16C;SPBC27B12.05;SPAC3H8.09C;SPAC328.03;SPAC1A6.07;SPCC737.05;SPAC30D11.07;SPAC3A11.0…
SPAC25H1.03	Protein Features		Phenylalanine	Higher	0.05124	0.0458636	0.00579969	SPAC212.01C;SPAC11D3.08C;SPAC1639.01C;SPAC13C5.06C;SPAC23G3.03;SPAC3A12.06C;SPAC5D6.07C;SPAC1399.05C;SPAC6B12.07C;SPAC32A11.01;SPAC6G9.14;SPAC328.03;SPAC2F3.05C;SPAC11E3.14;SPAC31A2.12;SPAC4G8.03C;SPAC22H12.01C;SPAC57A10.09C;SPAC607.09C;SPAC3C7.14C;SPAC13G7.05;SPAP32A8.02;SPAC8C9.03;SPAC26H5.04;SPAC683.03;SPAC9E9.04;SPAC19B12.10;SPAC1751.01C;SPAC13A11.06;SPAC139.04C;SPAC1A6.03C;SPAC1A6.06C;SPAPB2…
SPBC1289.16c	Transcript Features		mRNA stabilities	Lower	26.1175	37.7168	2.67609e-24	SPAC11D3.08C;SPAC1639.01C;SPAC13C5.06C;SPAC23G3.03;SPAC3A12.06C;SPAC5D6.07C;SPAC1399.05C;SPAC6B12.07C;SPAC32A11.01;SPAC6G9.14;SPAC328.03;SPAC2F3.05C;SPAC11E3.14;SPAC31A2.12;SPAC4G8.03C;SPAC22H12.01C;SPAC57A10.09C;SPAC607.09C;SPAC3C7.14C;SPAC13G7.05;SPAP32A8.02;SPAC8C9.03;SPAC26H5.04;SPAC9E9.04;SPAC19B12.10;SPAC1751.01C;SPAC13A11.06;SPAC139.04C;SPAC1A6.03C;SPAC1A6.06C;SPAPB24D3.08C;SPAC15E1.10;SPA…
SPAC19B12.08	Transcript Features		Ribosome occupancy (%)	Lower	74.2126	77.4472	0.00118118	SPAC212.01C;SPAC11D3.08C;SPAC1639.01C;SPAC13C5.06C;SPAC3A12.06C;SPAC1399.05C;SPAC6B12.07C;SPAC6G9.14;SPAC328.03;SPAC2F3.05C;SPAC11E3.14;SPAC31A2.12;SPAC22H12.01C;SPAC57A10.09C;SPAC3C7.14C;SPAP32A8.02;SPAC26H5.04;SPAC9E9.04;SPAC139.04C;SPAC1A6.03C;SPAPB24D3.08C;SPAC26H5.09C;SPAC21E11.03C;SPAC750.06C;SPAC4G9.19;SPAC22H10.02;SPAC31G5.12C;SPAC328.02;SPAC23A1.15C;SPAC2E12.02;SPAC26F1.07;SPAC750.05C;SP…
SPCC736.15	Transcript Features		mRNA level (WT)	Lower	2050.56	2838.78	0.00232714	SPAC11D3.08C;SPAC1639.01C;SPAC13C5.06C;SPAC23G3.03;SPAC3A12.06C;SPAC5D6.07C;SPAC1399.05C;SPAC6B12.07C;SPAC32A11.01;SPAC6G9.14;SPAC328.03;SPAC2F3.05C;SPAC11E3.14;SPAC31A2.12;SPAC4G8.03C;SPAC22H12.01C;SPAC57A10.09C;SPAC607.09C;SPAC3C7.14C;SPAC13G7.05;SPAP32A8.02;SPAC8C9.03;SPAC26H5.04;SPAC9E9.04;SPAC19B12.10;SPAC1751.01C;SPAC13A11.06;SPAC139.04C;SPAC1A6.03C;SPAPB24D3.08C;SPAC15E1.10;SPAC26H5.09C;SP…
SPAC19B12.10	Transcript Features		mRNA copies per proliferating cell	Lower	3.71906	8.3545	0.00915362	SPAC212.01C;SPAC11D3.08C;SPAC1639.01C;SPAC13C5.06C;SPAC23G3.03;SPAC3A12.06C;SPAC5D6.07C;SPAC1399.05C;SPAC6B12.07C;SPAC32A11.01;SPAC6G9.14;SPAC328.03;SPAC2F3.05C;SPAC11E3.14;SPAC31A2.12;SPAC4G8.03C;SPAC22H12.01C;SPAC57A10.09C;SPAC607.09C;SPAC3C7.14C;SPAC13G7.05;SPAP32A8.02;SPAC8C9.03;SPAC26H5.04;SPAC683.03;SPAC9E9.04;SPAC19B12.10;SPAC1751.01C;SPAC13A11.06;SPAC139.04C;SPAC1A6.03C;SPAC1A6.06C;SPAPB2…
SPAC227.03c
SPAC1687.07
SPBC337.02c
SPBPB7E8.02
SPBC14F5.10c
SPAC212.06c
SPCC830.07c
SPCC70.10
SPCC594.06c
SPCC63.08c
SPBC1105.13c
SPBC409.17c
SPAC26H5.04
SPBC17D1.17
SPCC16A11.01
SPBC1683.01
SPAC343.06c
SPAC23A1.16c
SPBC713.11c
SPCC16C4.02c
SPAC11D3.08c
SPBC16C6.14
SPAC25B8.12c
SPCC970.06
SPAC664.09
SPAC29E6.07
SPAC1A6.07
SPAC22H12.01c
SPBC947.04
SPBC1198.10c
SPBC25B2.03
SPCC663.06c
SPAC25H1.04
SPAC13C5.06c
SPAC4F8.10c
SPAC4G9.19
SPAC17G6.13
SPAC3A11.06
SPAC8C9.14
SPAC23A1.14c
SPBC3B9.06c
SPAC6G10.03c
SPBC1652.01
SPBC27B12.05
SPBC725.02
SPAC821.03c
SPCC584.15c
SPBP35G2.02
SPAC750.05c
SPCC794.12c
SPAC4G8.05
SPBC16A3.09c
SPAC31A2.12
SPAC328.02
SPAPB24D3.07c
SPCC1529.01
SPAC328.04
SPAC30D11.07
SPAC8E11.01c
SPCC31H12.02c
SPBC29B5.01
SPAC4G9.11c
SPAC1002.17c
SPCC1739.04c
SPAC688.13
SPCC1183.10
SPBC2F12.15c
SPBC1685.13
SPAC21E11.03c
SPCC1235.03
SPAC26H5.09c
SPAC750.06c
SPCC18.04
SPBC428.10
SPAC25H1.02
SPAC977.01
SPAC23A1.15c
SPBC4B4.08
SPCC1183.11
SPCC594.04c
SPBC19C7.09c
SPCC417.05c
SPBC106.02c
SPBP4H10.07
SPBC17D11.08
SPBC16C6.02c
SPAC25B8.19c
SPBC660.06
SPAC26F1.04c
SPAC21E11.07
SPCC548.06c
SPCC1183.04c
SPAC2E12.02
SPAC5D6.07c
SPAP32A8.02
SPBC215.05
SPBC2A9.02
SPBC56F2.05c
SPBC12C2.04
SPCC320.05
SPCC1884.01
SPAPB1A10.08
SPAC15E1.10
SPAC1687.14c
SPBC1289.06c
SPBC15D4.02
SPAC1639.01c
SPBC25B2.01
SPAC27D7.08c
SPAC869.11
SPCC736.05
SPAC1A6.03c
SPAC3A12.06c
SPAC10F6.05c
SPAC607.09c
SPACUNK4.15
SPAC22F3.09c
SPBPB2B2.02
SPAC1B3.11c
SPCC4F11.02
SPBC660.07
SPAC32A11.01
SPAPB24D3.08c
SPCC63.13
SPBC365.20c
SPAC3C7.14c
SPBC649.04
SPAC26F1.07
SPAC11D3.09
SPCC794.02
SPAC1399.05c
SPAC3H8.09c
SPAC637.13c
SPAC57A10.09c
SPCC4G3.05c
SPAC8C9.16c
SPBC12D12.02c
SPCC24B10.02c
SPAC1751.01c
SPCC31H12.08c
SPAC8C9.03
SPBC26H8.13c
SPCC1494.08c
SPACUNK4.16c
SPCC1494.03
SPCC4G3.07c
SPAPB2B4.04c
SPAC29A4.17c
SPAC186.05c
SPBC609.01
SPCC4B3.13
SPAC750.08c
SPBC1683.07
SPCC1322.07c
SPCC737.05
SPCC24B10.07
SPAC328.03
SPAC683.03
SPAC6B12.07c
SPBC26H8.05c
SPAC9E9.15
SPCC1183.05c
SPBC17D11.01
SPBC32H8.07
SPCC576.04
SPAC607.08c
SPAC212.01c
SPAC31G5.12c
SPBC215.04
SPBC530.11c
SPCC1259.08
SPAC4G8.03c
SPBCPT2R1.04c
SPCC285.10c

## Sheet: cluster 1
S3_2 Table. Cluster 1, functional enrichments.
Data were grouped into clusters as described. Gene group enrichments were determined for each cluster using AnGeLi.
cluster_1	Category_Name	External_ID	GeneSet_Name	over_represented/under_represented	List_Frequency	Background_Frequency	Corrected_pvalue	Genes_In_Common/Interacting_Gene_Pair
SPCC1322.02	GO Biological Process	GO:0031323	regulation of cellular metabolic process	Enriched	17.6033934252386 (166/943)	12.3661148977605 (635/5135)	0.000147373	SPBC21C3.16C;SPAC1002.08C;SPCC1739.12;SPAC3A11.08;SPCC1442.06;SPAC30D11.08C;SPBC336.12C;SPCC553.04;SPBP8B7.08C;SPCC1259.07;SPBC15D4.03;SPAC31G5.19;SPBC428.06C;SPAC17G6.12;SPAC110.02;SPCC663.05C;SPAC17A5.09C;SPBC2D10.06;SPBC3H7.15;SPCC63.12C;SPAC823.15;SPBC582.05C;SPAC664.07C;SPBC19G7.09;SPCC645.13;SPBC1198.04C;SPBP8B7.13;SPAC22F8.06;SPBC12D12.04C;SPAC1071.02;SPBC32F12.06;SPBC106.12C;SPBC83.07;SPA…
SPAC3H8.10	GO Biological Process	GO:0019222	regulation of metabolic process	Enriched	18.6638388123012 (176/943)	13.4177215189873 (689/5135)	0.000233346	SPBC21C3.16C;SPAC1002.08C;SPCC1739.12;SPAC3A11.08;SPCC1442.06;SPAC30D11.08C;SPBC336.12C;SPCC553.04;SPBP8B7.08C;SPCC1259.07;SPBC15D4.03;SPAC31G5.19;SPBC428.06C;SPAC17G6.12;SPAC110.02;SPAC13A11.01C;SPCC663.05C;SPAC17A5.09C;SPBC2D10.06;SPCC11E10.04;SPBC3H7.15;SPCC63.12C;SPAC823.15;SPBC582.05C;SPAC664.07C;SPBC19G7.09;SPCC645.13;SPBC1198.04C;SPBP8B7.13;SPAC22F8.06;SPBC12D12.04C;SPAC1071.02;SPBC32F12.0…
SPBC1709.06	GO Biological Process	GO:0008150	biological process	Enriched	99.8939554612937 (942/943)	98.3057448880234 (5048/5135)	0.000337275	SPAC4F10.04;SPBP35G2.09;SPCP31B10.07;SPBC21C3.16C;SPCC1682.07;SPAC1002.08C;SPBC19C2.10;SPAP14E8.03;SPCC1739.12;SPBC2D10.05;SPCC1795.07;SPAC3A11.08;SPCC970.02;SPBC2G5.07C;SPAC644.09;SPCC1442.06;SPAC2C4.10C;SPAC1851.04C;SPAC4F8.02C;SPAC30D11.08C;SPCC24B10.04;SPAC22H10.05C;SPCC18.19C;SPBC13E7.01;SPBC2F12.08C;SPBC336.12C;SPCC757.08;SPBC21B10.06C;SPAC17G8.02;SPCC330.02;SPAC23H4.02;SPBC354.12;SPAP8A3.0…
SPBC530.04	GO Biological Process	GO:0080090	regulation of primary metabolic process	Enriched	17.0731707317073 (161/943)	12.1713729308666 (625/5135)	0.000345433	SPBC21C3.16C;SPAC1002.08C;SPCC1739.12;SPAC3A11.08;SPCC1442.06;SPAC30D11.08C;SPBC336.12C;SPCC553.04;SPCC1259.07;SPBC15D4.03;SPAC31G5.19;SPBC428.06C;SPAC17G6.12;SPAC110.02;SPCC663.05C;SPAC17A5.09C;SPBC2D10.06;SPBC3H7.15;SPCC63.12C;SPAC823.15;SPBC582.05C;SPAC664.07C;SPBC19G7.09;SPCC645.13;SPBC1198.04C;SPBP8B7.13;SPAC22F8.06;SPBC12D12.04C;SPAC1071.02;SPBC32F12.06;SPBC106.12C;SPBC83.07;SPAC343.18;SPBC…
SPBC16A3.07c	GO Biological Process	GO:0043170	macromolecule metabolic process	Enriched	52.2799575821845 (493/943)	45.2580331061344 (2324/5135)	0.000628926	SPBP35G2.09;SPCP31B10.07;SPBC21C3.16C;SPCC1682.07;SPAC1002.08C;SPCC1739.12;SPBC2D10.05;SPCC1795.07;SPAC3A11.08;SPCC970.02;SPBC2G5.07C;SPCC1442.06;SPAC4F8.02C;SPAC30D11.08C;SPAC22H10.05C;SPCC18.19C;SPBC13E7.01;SPBC2F12.08C;SPBC336.12C;SPCC757.08;SPCC330.02;SPAP8A3.06;SPAC4F10.19C;SPAC227.16C;SPAC821.05;SPCC663.10;SPCC553.04;SPBP8B7.08C;SPBC23E6.02;SPAC30D11.14C;SPBC36B7.03;SPACUNK4.12C;SPAC19A8.14…
SPCC16C4.20c	GO Biological Process	GO:0050789	regulation of biological process	Enriched	27.1474019088017 (256/943)	21.2852969814995 (1093/5135)	0.000632551	SPBC21C3.16C;SPAC1002.08C;SPCC1739.12;SPAC3A11.08;SPCC1442.06;SPAC2C4.10C;SPAC1851.04C;SPAC30D11.08C;SPBC336.12C;SPAC23H4.02;SPCC553.04;SPBC25H2.06C;SPAC3H8.10;SPBP8B7.08C;SPBC1604.20C;SPAC6F6.10C;SPCC1259.07;SPBC15D4.03;SPAC31G5.19;SPAC3C7.06C;SPAC6G10.02C;SPBC428.06C;SPAC17G6.12;SPAC110.02;SPAC13A11.01C;SPBC428.20C;SPBC409.18;SPCC663.05C;SPAC17A5.09C;SPBC16H5.11C;SPBC2D10.06;SPCC11E10.04;SPBC3H…
SPBP19A11.06	GO Biological Process	GO:0050794	regulation of cellular process	Enriched	26.5111346765642 (250/943)	20.7010710808179 (1063/5135)	0.000632551	SPBC21C3.16C;SPAC1002.08C;SPCC1739.12;SPAC3A11.08;SPCC1442.06;SPAC2C4.10C;SPAC1851.04C;SPAC30D11.08C;SPBC336.12C;SPAC23H4.02;SPCC553.04;SPBC25H2.06C;SPBP8B7.08C;SPBC1604.20C;SPAC6F6.10C;SPCC1259.07;SPBC15D4.03;SPAC31G5.19;SPAC3C7.06C;SPAC6G10.02C;SPBC428.06C;SPAC17G6.12;SPAC110.02;SPAC13A11.01C;SPBC428.20C;SPBC409.18;SPCC663.05C;SPAC17A5.09C;SPBC16H5.11C;SPBC2D10.06;SPBC3H7.15;SPBC21B10.05C;SPCC6…
SPAC21E11.08	GO Biological Process	GO:0060255	regulation of macromolecule metabolic process	Enriched	16.6489925768823 (157/943)	11.9766309639727 (615/5135)	0.000866114	SPBC21C3.16C;SPAC1002.08C;SPAC3A11.08;SPCC1442.06;SPAC30D11.08C;SPBC336.12C;SPCC553.04;SPCC1259.07;SPBC15D4.03;SPAC31G5.19;SPBC428.06C;SPAC17G6.12;SPAC110.02;SPCC663.05C;SPAC17A5.09C;SPBC2D10.06;SPCC11E10.04;SPBC3H7.15;SPCC63.12C;SPAC823.15;SPBC582.05C;SPAC664.07C;SPBC19G7.09;SPCC645.13;SPBC1198.04C;SPBP8B7.13;SPAC22F8.06;SPBC12D12.04C;SPAC1071.02;SPBC32F12.06;SPBC106.12C;SPBC83.07;SPAC343.18;SPB…
SPAC1A6.01c	GO Biological Process	GO:0044260	cellular macromolecule metabolic process	Enriched	50.5832449628844 (477/943)	43.8948393378773 (2254/5135)	0.00161654	SPBP35G2.09;SPCP31B10.07;SPBC21C3.16C;SPCC1682.07;SPAC1002.08C;SPCC1739.12;SPBC2D10.05;SPCC1795.07;SPAC3A11.08;SPCC970.02;SPBC2G5.07C;SPCC1442.06;SPAC4F8.02C;SPAC30D11.08C;SPAC22H10.05C;SPCC18.19C;SPBC13E7.01;SPBC2F12.08C;SPBC336.12C;SPCC757.08;SPCC330.02;SPAP8A3.06;SPAC4F10.19C;SPAC227.16C;SPAC821.05;SPCC663.10;SPCC553.04;SPBP8B7.08C;SPBC23E6.02;SPAC30D11.14C;SPBC36B7.03;SPAC19A8.14;SPCC645.09;S…
SPAC22H10.04	GO Biological Process	GO:0009889	regulation of biosynthetic process	Enriched	13.0434782608696 (123/943)	9.15287244401168 (470/5135)	0.00272748	SPBC21C3.16C;SPAC1002.08C;SPCC1739.12;SPAC3A11.08;SPAC30D11.08C;SPBC336.12C;SPCC553.04;SPCC1259.07;SPBC15D4.03;SPAC31G5.19;SPBC428.06C;SPAC17G6.12;SPCC663.05C;SPBC2D10.06;SPAC823.15;SPBC19G7.09;SPCC645.13;SPBC1198.04C;SPBP8B7.13;SPBC12D12.04C;SPAC1071.02;SPBC32F12.06;SPBC106.12C;SPBC83.07;SPBC29A3.08;SPBC16D10.07C;SPAC29A4.18;SPAC25B8.04C;SPCC757.04;SPBC119.09C;SPAC24B11.06C;SPAC23C11.15;SPAC18G6…
SPBC18E5.11c	GO Biological Process	GO:0031326	regulation of cellular biosynthetic process	Enriched	13.0434782608696 (123/943)	9.15287244401168 (470/5135)	0.00272748	SPBC21C3.16C;SPAC1002.08C;SPCC1739.12;SPAC3A11.08;SPAC30D11.08C;SPBC336.12C;SPCC553.04;SPCC1259.07;SPBC15D4.03;SPAC31G5.19;SPBC428.06C;SPAC17G6.12;SPCC663.05C;SPBC2D10.06;SPAC823.15;SPBC19G7.09;SPCC645.13;SPBC1198.04C;SPBP8B7.13;SPBC12D12.04C;SPAC1071.02;SPBC32F12.06;SPBC106.12C;SPBC83.07;SPBC29A3.08;SPBC16D10.07C;SPAC29A4.18;SPAC25B8.04C;SPCC757.04;SPBC119.09C;SPAC24B11.06C;SPAC23C11.15;SPAC18G6…
SPBC14F5.13c	GO Biological Process	GO:0016070	RNA metabolic process	Enriched	24.9204665959703 (235/943)	19.8442064264849 (1019/5135)	0.00539634	SPBP35G2.09;SPBC21C3.16C;SPCC1682.07;SPAC1002.08C;SPAC3A11.08;SPBC2G5.07C;SPAC30D11.08C;SPAC22H10.05C;SPBC13E7.01;SPBC2F12.08C;SPBC336.12C;SPCC757.08;SPAP8A3.06;SPAC4F10.19C;SPCC663.10;SPCC553.04;SPAC30D11.14C;SPBC6B1.10;SPAC343.13;SPAC17A5.14;SPCC1259.07;SPBC15D4.03;SPAC31G5.19;SPAC29A4.04C;SPBC428.06C;SPAC1F3.04C;SPBC19G7.10C;SPCC1281.02C;SPCC663.05C;SPBC25D12.05;SPBC2D10.06;SPCC18B5.08C;SPAC6F…
SPBC4F6.05c	GO Biological Process	GO:0090304	nucleic acid metabolic process	Enriched	29.9045599151644 (282/943)	24.5569620253165 (1261/5135)	0.00686098	SPBP35G2.09;SPBC21C3.16C;SPCC1682.07;SPAC1002.08C;SPAC3A11.08;SPBC2G5.07C;SPAC30D11.08C;SPAC22H10.05C;SPBC13E7.01;SPBC2F12.08C;SPBC336.12C;SPCC757.08;SPCC330.02;SPAP8A3.06;SPAC4F10.19C;SPAC227.16C;SPCC663.10;SPCC553.04;SPBC23E6.02;SPAC30D11.14C;SPAC22F3.03C;SPBC6B1.10;SPAC343.13;SPAC17A5.14;SPCC1259.07;SPBC15D4.03;SPAC31G5.19;SPAC29A4.04C;SPBC428.06C;SPAC17G6.12;SPAC1F3.04C;SPBC19G7.10C;SPCC1281.…
SPAC4D7.01c	GO Biological Process	GO:0032774	RNA biosynthetic process	Enriched	13.1495227995758 (124/943)	9.46445959104187 (486/5135)	0.00710571	SPBC21C3.16C;SPCC1682.07;SPAC1002.08C;SPAC3A11.08;SPBC2G5.07C;SPAC30D11.08C;SPBC336.12C;SPCC553.04;SPCC1259.07;SPBC15D4.03;SPAC31G5.19;SPBC428.06C;SPCC663.05C;SPBC2D10.06;SPAC6F12.11C;SPBC19G7.09;SPCC645.13;SPBC1198.04C;SPCP25A2.03;SPAC1071.02;SPBC32F12.06;SPBC106.12C;SPBC83.07;SPBC29A3.08;SPBC16D10.07C;SPAC29A4.18;SPBC776.18C;SPCC553.09C;SPCC757.04;SPCC24B10.11C;SPAC24B11.06C;SPAC23C11.15;SPAC1F…
SPBC106.05c	GO Biological Process	GO:0006351	transcription, DNA-templated	Enriched	12.9374337221633 (122/943)	9.269717624148 (476/5135)	0.00726574	SPBC21C3.16C;SPCC1682.07;SPAC1002.08C;SPAC3A11.08;SPBC2G5.07C;SPAC30D11.08C;SPBC336.12C;SPCC553.04;SPCC1259.07;SPBC15D4.03;SPAC31G5.19;SPBC428.06C;SPCC663.05C;SPBC2D10.06;SPAC6F12.11C;SPBC19G7.09;SPCC645.13;SPBC1198.04C;SPCP25A2.03;SPAC1071.02;SPBC32F12.06;SPBC106.12C;SPBC83.07;SPBC29A3.08;SPBC16D10.07C;SPAC29A4.18;SPBC776.18C;SPCC757.04;SPCC24B10.11C;SPAC24B11.06C;SPAC23C11.15;SPAC1F7.11C;SPAC17…
SPBC1703.14c	GO Biological Process	GO:0097659	nucleic acid-templated transcription	Enriched	12.9374337221633 (122/943)	9.269717624148 (476/5135)	0.00726574	SPBC21C3.16C;SPCC1682.07;SPAC1002.08C;SPAC3A11.08;SPBC2G5.07C;SPAC30D11.08C;SPBC336.12C;SPCC553.04;SPCC1259.07;SPBC15D4.03;SPAC31G5.19;SPBC428.06C;SPCC663.05C;SPBC2D10.06;SPAC6F12.11C;SPBC19G7.09;SPCC645.13;SPBC1198.04C;SPCP25A2.03;SPAC1071.02;SPBC32F12.06;SPBC106.12C;SPBC83.07;SPBC29A3.08;SPBC16D10.07C;SPAC29A4.18;SPBC776.18C;SPCC757.04;SPCC24B10.11C;SPAC24B11.06C;SPAC23C11.15;SPAC1F7.11C;SPAC17…
SPBP4H10.04	GO Biological Process	GO:0010556	regulation of macromolecule biosynthetic process	Enriched	12.3011664899258 (116/943)	8.72444011684518 (448/5135)	0.00748752	SPBC21C3.16C;SPAC1002.08C;SPAC3A11.08;SPAC30D11.08C;SPBC336.12C;SPCC553.04;SPCC1259.07;SPBC15D4.03;SPAC31G5.19;SPBC428.06C;SPAC17G6.12;SPCC663.05C;SPBC2D10.06;SPAC823.15;SPBC19G7.09;SPCC645.13;SPBC1198.04C;SPBC12D12.04C;SPAC1071.02;SPBC32F12.06;SPBC106.12C;SPBC83.07;SPBC29A3.08;SPBC16D10.07C;SPAC29A4.18;SPAC25B8.04C;SPCC757.04;SPBC119.09C;SPAC24B11.06C;SPAC23C11.15;SPAC18G6.05C;SPAC1F7.11C;SPAC17…
SPAC1687.17c	GO Biological Process	GO:0006366	transcription from RNA polymerase II promoter	Enriched	9.5440084835631 (90/943)	6.46543330087634 (332/5135)	0.00916011	SPBC21C3.16C;SPCC1682.07;SPAC1002.08C;SPAC3A11.08;SPAC30D11.08C;SPBC336.12C;SPBC15D4.03;SPAC31G5.19;SPBC428.06C;SPBC2D10.06;SPCC645.13;SPBC1198.04C;SPCP25A2.03;SPAC1071.02;SPBC32F12.06;SPBC106.12C;SPBC83.07;SPBC29A3.08;SPBC16D10.07C;SPBC776.18C;SPCC757.04;SPCC24B10.11C;SPAC24B11.06C;SPAC1F7.11C;SPAC17H9.09C;SPBC1A4.10C;SPBC2A9.09;SPBC83.17;SPBC30B4.07C;SPBC32H8.11;SPBC17G9.05;SPBC16A3.07C;SPCC128…
SPBC28F2.09	GO Biological Process	GO:2000112	regulation of cellular macromolecule biosynthetic process	Enriched	12.1951219512195 (115/943)	8.70496592015579 (447/5135)	0.00935293	SPBC21C3.16C;SPAC1002.08C;SPAC3A11.08;SPAC30D11.08C;SPBC336.12C;SPCC553.04;SPCC1259.07;SPBC15D4.03;SPAC31G5.19;SPBC428.06C;SPAC17G6.12;SPCC663.05C;SPBC2D10.06;SPAC823.15;SPBC19G7.09;SPCC645.13;SPBC1198.04C;SPBC12D12.04C;SPAC1071.02;SPBC32F12.06;SPBC106.12C;SPBC83.07;SPBC29A3.08;SPBC16D10.07C;SPAC29A4.18;SPAC25B8.04C;SPCC757.04;SPAC24B11.06C;SPAC23C11.15;SPAC18G6.05C;SPAC1F7.11C;SPAC17H9.09C;SPBC1…
SPBC106.19	GO Biological Process	GO:0051171	regulation of nitrogen compound metabolic process	Enriched	12.3011664899258 (116/943)	8.78286270691334 (451/5135)	0.00971413	SPBC21C3.16C;SPAC1002.08C;SPAC3A11.08;SPAC30D11.08C;SPBC336.12C;SPCC553.04;SPCC1259.07;SPBC15D4.03;SPAC31G5.19;SPBC428.06C;SPAC17G6.12;SPCC663.05C;SPBC2D10.06;SPBC3H7.15;SPBC582.05C;SPAC664.07C;SPBC19G7.09;SPCC645.13;SPBC1198.04C;SPAC1071.02;SPBC32F12.06;SPBC106.12C;SPBC83.07;SPBC29A3.08;SPBC16D10.07C;SPAC29A4.18;SPCC757.04;SPBC119.09C;SPAC24B11.06C;SPAC23C11.15;SPAC1F7.11C;SPAC17H9.09C;SPBC1A4.1…
SPAC6F12.08c	Gene Expression		Core Environmental Stress Response repressed	Underrepresented	3.1813361611877 (30/943)	8.5491723466407 (439/5135)	7.86642e-09	SPAPB1E7.07;SPAC29A4.04C;SPAC24H6.10C;SPBC1685.02C;SPCC24B10.11C;SPAC8C9.08;SPAC694.05C;SPBC1709.05;SPBC691.04;SPAC664.05;SPAC22A12.04C;SPBC19C2.08;SPAC343.16;SPAC22G7.06C;SPBC405.07;SPBC106.18;SPCC1322.11;SPAC15E1.08;SPCC417.08;SPAC24B11.13;SPBC23G7.15C;SPCC576.09;SPCC825.03C;SPBC29A3.04;SPAC23A1.08C;SPAC637.09;SPAC2C4.16C;SPCC18.05C;SPBC18H10.03;SPAC513.01C
SPBC887.19	Gene Expression		Reproduction module	Underrepresented	1.59066808059385 (15/943)	5.74488802336904 (295/5135)	4.17678e-08	SPAC922.06;SPCC191.05C;SPAP14E8.04;SPBC1683.06C;SPAC29B12.14C;SPAC1F5.09C;SPBC1683.02;SPBC21D10.06C;SPAPB2B4.07;SPBC800.11;SPAC1002.18;SPAC1F7.06;SPBC1652.02;SPBC3E7.06C;SPAC3F10.10C
SPCC777.09c	Gene Expression		Caffeine and Rapamycin repressed	Underrepresented	2.01484623541888 (19/943)	5.92015579357351 (304/5135)	8.5304e-07	SPCC550.15C;SPAC29A4.04C;SPAC24H6.10C;SPBC17D1.05;SPBC530.07C;SPBC1685.02C;SPBC530.02;SPBC691.04;SPAC22A12.04C;SPAC589.03C;SPBC106.18;SPAC1B3.16C;SPBC28F2.02;SPAC1805.11C;SPAC23A1.08C;SPBC1652.02;SPCC31H12.05C;SPCC18.05C;SPBC18H10.03
SPAC17G8.14c	Gene Expression		Core Environmental Stress Response induced	Underrepresented	5.72640509013786 (54/943)	10.4381694255112 (536/5135)	2.6346e-05	SPCC1682.07;SPBC2D10.05;SPBC336.12C;SPCC330.02;SPAC521.04C;SPCC757.10;SPAC2C4.15C;SPAC24H6.12C;SPAC9E9.11;SPBP8B7.13;SPAC22G7.08;SPBC1683.06C;SPCC757.04;SPAC167.07C;SPBC119.09C;SPBC4F6.17C;SPCC777.10C;SPAC328.07C;SPAC13D6.01;SPAC458.04C;SPBC887.19;SPAC644.06C;SPAC11E3.09;SPCC576.03C;SPCC1322.04;SPBC14F5.13C;SPAC3H8.04;SPAC24H6.06;SPAC12G12.12;SPBC3B8.10C;SPAC1834.11C;SPBC530.05;SPBC660.11;SPBC405…
SPAC26H5.12	Gene Expression		Oxidative Stess Cluster 4	Underrepresented	4.02969247083775 (38/943)	8.00389483933788 (411/5135)	8.62631e-05	SPBC2D10.05;SPBC336.12C;SPCC330.02;SPAC521.04C;SPCC757.10;SPAC2C4.15C;SPBP8B7.13;SPCC757.04;SPBC119.09C;SPCC777.10C;SPAC328.07C;SPAC13D6.01;SPBC887.19;SPAC644.06C;SPAC11E3.09;SPBC14F5.13C;SPAC3H8.04;SPAC24H6.06;SPAC12G12.12;SPBC3B8.10C;SPAC1834.11C;SPBC530.05;SPCC757.11C;SPAPB24D3.09C;SPAC22H12.03;SPBC20F10.07;SPBC16H5.07C;SPAC6C3.08;SPAC12G12.16C;SPAC17A5.10;SPAC23G3.02C;SPAC26F1.02;SPAC4A8.03C;…
SPAC521.04c	Gene Expression		Stress module	Underrepresented	0.530222693531283 (5/943)	2.62901655306719 (135/5135)	0.000218134	SPBC2D10.05;SPAC2C4.15C;SPAC6F6.02C;SPCC576.03C;SPAC4A8.03C
SPBC30D10.16	Gene Expression		Caffeine and Rapamycin induced	Underrepresented	2.86320254506893 (27/943)	5.60856864654333 (288/5135)	0.00442055	SPBC2D10.05;SPAC9E9.11;SPAC922.06;SPCC191.05C;SPCPB16A4.05C;SPBC8E4.03;SPBC1683.06C;SPAC29B12.14C;SPBC4F6.17C;SPBC1683.02;SPAC1565.08;SPAC1399.04C;SPBC56F2.11;SPCC576.03C;SPBC16G5.02C;SPCC1322.04;SPCC1672.03C;SPAC922.03;SPAC869.10C;SPBC800.11;SPAC1002.18;SPCC576.02;SPBP26C9.02C;SPAC24H6.11C;SPCC757.13;SPAC1F7.10;SPBC21B10.08C
SPCC1682.07	Phenotypes (FYPO)	FYPO:0001320	vegetative cell phenotype	Enriched	96.9247083775186 (914/943)	92.794547224927 (4765/5135)	6.2624e-06	SPAC4F10.04;SPBP35G2.09;SPCP31B10.07;SPBC21C3.16C;SPCC1682.07;SPAC1002.08C;SPBC19C2.10;SPAP14E8.03;SPCC1739.12;SPBC2D10.05;SPCC1795.07;SPAC3A11.08;SPCC970.02;SPBC2G5.07C;SPAC644.09;SPCC1442.06;SPAC2C4.10C;SPAC1851.04C;SPAC4F8.02C;SPAC30D11.08C;SPCC24B10.04;SPAC22H10.05C;SPBC13E7.01;SPBC2F12.08C;SPBC336.12C;SPCC757.08;SPBC21B10.06C;SPAC17G8.02;SPCC330.02;SPAC23H4.02;SPBC354.12;SPAP8A3.06;SPAC521.0…
SPCC962.03c	Phenotypes (FYPO)	FYPO:0001321	cellular physical quality phenotype during vegetative growth	Enriched	96.712619300106 (912/943)	92.5803310613437 (4754/5135)	8.89004e-06	SPAC4F10.04;SPBP35G2.09;SPCP31B10.07;SPBC21C3.16C;SPCC1682.07;SPAC1002.08C;SPBC19C2.10;SPAP14E8.03;SPCC1739.12;SPBC2D10.05;SPCC1795.07;SPAC3A11.08;SPCC970.02;SPBC2G5.07C;SPAC644.09;SPCC1442.06;SPAC2C4.10C;SPAC1851.04C;SPAC4F8.02C;SPAC30D11.08C;SPCC24B10.04;SPAC22H10.05C;SPBC13E7.01;SPBC2F12.08C;SPBC336.12C;SPCC757.08;SPBC21B10.06C;SPAC17G8.02;SPCC330.02;SPAC23H4.02;SPBC354.12;SPAP8A3.06;SPAC521.0…
SPAC22G7.06c	Phenotypes (FYPO)	FYPO:0000136	cellular physical quality phenotype	Enriched	98.1972428419936 (926/943)	94.8588120740019 (4871/5135)	1.71223e-05	SPAC4F10.04;SPBP35G2.09;SPCP31B10.07;SPBC21C3.16C;SPCC1682.07;SPAC1002.08C;SPBC19C2.10;SPAP14E8.03;SPCC1739.12;SPBC2D10.05;SPCC1795.07;SPAC3A11.08;SPCC970.02;SPBC2G5.07C;SPAC644.09;SPCC1442.06;SPAC2C4.10C;SPAC1851.04C;SPAC4F8.02C;SPAC30D11.08C;SPCC24B10.04;SPAC22H10.05C;SPBC13E7.01;SPBC2F12.08C;SPBC336.12C;SPCC757.08;SPBC21B10.06C;SPAC17G8.02;SPCC330.02;SPAC23H4.02;SPBC354.12;SPAP8A3.06;SPAC521.0…
SPBC1604.14c	Phenotypes (FYPO)	FYPO:0000002	cell phenotype	Enriched	98.3032873806999 (927/943)	95.0535540408958 (4881/5135)	2.15041e-05	SPAC4F10.04;SPBP35G2.09;SPCP31B10.07;SPBC21C3.16C;SPCC1682.07;SPAC1002.08C;SPBC19C2.10;SPAP14E8.03;SPCC1739.12;SPBC2D10.05;SPCC1795.07;SPAC3A11.08;SPCC970.02;SPBC2G5.07C;SPAC644.09;SPCC1442.06;SPAC2C4.10C;SPAC1851.04C;SPAC4F8.02C;SPAC30D11.08C;SPCC24B10.04;SPAC22H10.05C;SPBC13E7.01;SPBC2F12.08C;SPBC336.12C;SPCC757.08;SPBC21B10.06C;SPAC17G8.02;SPCC330.02;SPAC23H4.02;SPBC354.12;SPAP8A3.06;SPAC521.0…
SPAC23C11.15	Phenotypes (FYPO)	FYPO:0002057	cell population viability	Enriched	98.5153764581124 (929/943)	95.715676728335 (4915/5135)	0.000156639	SPAC4F10.04;SPBP35G2.09;SPCP31B10.07;SPBC21C3.16C;SPCC1682.07;SPAC1002.08C;SPBC19C2.10;SPAP14E8.03;SPCC1739.12;SPBC2D10.05;SPCC1795.07;SPAC3A11.08;SPCC970.02;SPBC2G5.07C;SPAC644.09;SPCC1442.06;SPAC2C4.10C;SPAC1851.04C;SPAC4F8.02C;SPAC30D11.08C;SPCC24B10.04;SPAC22H10.05C;SPBC13E7.01;SPBC2F12.08C;SPBC336.12C;SPCC757.08;SPBC21B10.06C;SPAC17G8.02;SPCC330.02;SPAC23H4.02;SPBC354.12;SPAP8A3.06;SPAC521.0…
SPAC13G6.15c	Phenotypes (FYPO)	FYPO:0000003	cell population phenotype	Enriched	98.6214209968187 (930/943)	95.9493670886076 (4927/5135)	0.000254959	SPAC4F10.04;SPBP35G2.09;SPCP31B10.07;SPBC21C3.16C;SPCC1682.07;SPAC1002.08C;SPBC19C2.10;SPAP14E8.03;SPCC1739.12;SPBC2D10.05;SPCC1795.07;SPAC3A11.08;SPCC970.02;SPBC2G5.07C;SPAC644.09;SPCC1442.06;SPAC2C4.10C;SPAC1851.04C;SPAC4F8.02C;SPAC30D11.08C;SPCC24B10.04;SPAC22H10.05C;SPBC13E7.01;SPBC2F12.08C;SPBC336.12C;SPCC757.08;SPBC21B10.06C;SPAC17G8.02;SPCC330.02;SPAC23H4.02;SPBC354.12;SPAP8A3.06;SPAC521.0…
SPBC3E7.09	Phenotypes (FYPO)	FYPO:0000001	phenotype	Enriched	98.6214209968187 (930/943)	96.0272638753651 (4931/5135)	0.000327224	SPAC4F10.04;SPBP35G2.09;SPCP31B10.07;SPBC21C3.16C;SPCC1682.07;SPAC1002.08C;SPBC19C2.10;SPAP14E8.03;SPCC1739.12;SPBC2D10.05;SPCC1795.07;SPAC3A11.08;SPCC970.02;SPBC2G5.07C;SPAC644.09;SPCC1442.06;SPAC2C4.10C;SPAC1851.04C;SPAC4F8.02C;SPAC30D11.08C;SPCC24B10.04;SPAC22H10.05C;SPBC13E7.01;SPBC2F12.08C;SPBC336.12C;SPCC757.08;SPBC21B10.06C;SPAC17G8.02;SPCC330.02;SPAC23H4.02;SPBC354.12;SPAP8A3.06;SPAC521.0…
SPAC1805.09c	Phenotypes (FYPO)	FYPO:0000004	cell viability	Enriched	97.3488865323436 (918/943)	94.2161635832522 (4838/5135)	0.000364665	SPAC4F10.04;SPBP35G2.09;SPCP31B10.07;SPBC21C3.16C;SPCC1682.07;SPAC1002.08C;SPBC19C2.10;SPAP14E8.03;SPCC1739.12;SPBC2D10.05;SPCC1795.07;SPAC3A11.08;SPCC970.02;SPBC2G5.07C;SPAC644.09;SPCC1442.06;SPAC2C4.10C;SPAC1851.04C;SPAC4F8.02C;SPAC30D11.08C;SPCC24B10.04;SPAC22H10.05C;SPBC13E7.01;SPBC2F12.08C;SPBC336.12C;SPCC757.08;SPBC21B10.06C;SPAC17G8.02;SPCC330.02;SPAC23H4.02;SPBC354.12;SPAP8A3.06;SPAC521.0…
SPBC19F8.04c	Phenotypes (FYPO)	FYPO:0004638	abnormal cellular physical quality phenotype	Enriched	47.2958642629905 (446/943)	40.4284323271665 (2076/5135)	0.000801325	SPAC4F10.04;SPBP35G2.09;SPCC1682.07;SPAC1002.08C;SPBC19C2.10;SPCC1739.12;SPCC1795.07;SPAC3A11.08;SPAC2C4.10C;SPAC1851.04C;SPAC4F8.02C;SPAC30D11.08C;SPCC24B10.04;SPBC2F12.08C;SPBC336.12C;SPCC757.08;SPAC17G8.02;SPAP8A3.06;SPAC227.16C;SPBC25B2.08;SPAC821.05;SPCC16A11.07;SPBC25H2.06C;SPAC3H8.10;SPBP8B7.08C;SPBC23E6.02;SPCC757.10;SPAC23D3.06C;SPBC1604.20C;SPCC645.09;SPAC22F3.03C;SPBC6B1.10;SPAC343.13;…
SPBC1703.11	Phenotypes (FYPO)	FYPO:0001489	inviable vegetative cell	Enriched	31.9194061505832 (301/943)	25.9591041869523 (1333/5135)	0.00167349	SPAC4F10.04;SPBP35G2.09;SPCC1682.07;SPAC1002.08C;SPAP14E8.03;SPCC1795.07;SPAC3A11.08;SPBC2G5.07C;SPCC1442.06;SPAC4F8.02C;SPAC30D11.08C;SPAC22H10.05C;SPBC13E7.01;SPBC2F12.08C;SPBC336.12C;SPCC757.08;SPAC17G8.02;SPAP8A3.06;SPAC227.16C;SPCC16A11.07;SPBC25H2.06C;SPAC3H8.10;SPCC757.10;SPAC23D3.06C;SPCC645.09;SPAC343.13;SPAC24H6.12C;SPAC17A5.14;SPAC6F6.10C;SPCC1259.07;SPAC29A4.04C;SPAC4A8.16C;SPAC17G6.1…
SPAC23C4.13	Phenotypes (FYPO)	FYPO:0003037	abnormal cell phenotype	Enriched	50.2651113467656 (474/943)	43.8169425511198 (2250/5135)	0.00272748	SPAC4F10.04;SPBP35G2.09;SPCC1682.07;SPAC1002.08C;SPBC19C2.10;SPCC1739.12;SPCC1795.07;SPAC3A11.08;SPBC2G5.07C;SPAC2C4.10C;SPAC1851.04C;SPAC4F8.02C;SPAC30D11.08C;SPCC24B10.04;SPBC2F12.08C;SPBC336.12C;SPCC757.08;SPAC17G8.02;SPAP8A3.06;SPAC227.16C;SPBC25B2.08;SPAC821.05;SPCC16A11.07;SPBC25H2.06C;SPAC3H8.10;SPBP8B7.08C;SPBC23E6.02;SPCC757.10;SPAC23D3.06C;SPBC1604.20C;SPCC645.09;SPAC22F3.03C;SPBC6B1.10…
SPCC576.03c	Phenotypes (FYPO)	FYPO:0002148	inviable after spore germination, multiple cell divisions, abnormal morphology	Enriched	6.46871686108165 (61/943)	3.85589094449854 (198/5135)	0.00333959	SPBP35G2.09;SPCC1682.07;SPAC1002.08C;SPAC3A11.08;SPAC30D11.08C;SPAC24H6.12C;SPCC1259.07;SPAC17G6.12;SPAC6F12.11C;SPBC12D12.08C;SPBC1198.04C;SPBC32F12.06;SPAC4C5.02C;SPBC83.07;SPBC776.18C;SPAC19A8.12;SPAC3G6.10C;SPBC146.14C;SPCC777.10C;SPBC1A4.10C;SPBC13E7.10C;SPCC777.05;SPBC2A9.09;SPCC70.07C;SPBC30B4.07C;SPBC21D10.05C;SPAC2C4.04C;SPBC19C2.08;SPBC31F10.04C;SPBC30D10.02;SPAC823.12;SPCC1620.01C;SPBC…
SPCC188.11	Phenotypes (FYPO)	FYPO:0000005	abnormal cell morphology	Enriched	37.4337221633086 (353/943)	31.4508276533593 (1615/5135)	0.00371609	SPAC4F10.04;SPBP35G2.09;SPCC1682.07;SPAC1002.08C;SPBC19C2.10;SPCC1739.12;SPCC1795.07;SPAC3A11.08;SPAC2C4.10C;SPAC1851.04C;SPAC4F8.02C;SPAC30D11.08C;SPCC24B10.04;SPBC2F12.08C;SPBC336.12C;SPCC757.08;SPAC17G8.02;SPAP8A3.06;SPAC227.16C;SPBC25B2.08;SPAC821.05;SPCC16A11.07;SPBC25H2.06C;SPAC3H8.10;SPCC757.10;SPAC23D3.06C;SPBC1604.20C;SPCC645.09;SPAC22F3.03C;SPBC6B1.10;SPAC343.13;SPAC24H6.12C;SPAC17A5.14…
SPAC31G5.16c	Phenotypes (FYPO)	FYPO:0002430	inviable after spore germination, multiple cell divisions	Enriched	7.31707317073171 (69/943)	4.53748782862707 (233/5135)	0.00418198	SPBP35G2.09;SPCC1682.07;SPAC1002.08C;SPAC3A11.08;SPAC30D11.08C;SPAC24H6.12C;SPCC1259.07;SPAC17G6.12;SPAC6F12.11C;SPBC12D12.08C;SPBC1198.04C;SPBC32F12.06;SPAC4C5.02C;SPBC83.07;SPBC776.18C;SPAC19A8.12;SPAC3G6.10C;SPBC146.14C;SPCC777.10C;SPBC1A4.10C;SPBC13E7.10C;SPCC777.05;SPBC2A9.09;SPCC70.07C;SPBC30B4.07C;SPBC21D10.05C;SPAC2C4.04C;SPBC19C2.08;SPBC31F10.04C;SPBC30D10.02;SPAC823.12;SPCC1620.01C;SPBC…
SPAC22H12.03	Protein Features		Protein copies per quiescent cell	Lower	8266.14	12172.3	0.00272748	SPAC13G6.03;SPAC24B11.10C;SPAC630.03;SPAC31A2.09C;SPAC227.08C;SPAC2F7.07C;SPAC22H12.03;SPAC222.17;SPAC23C4.08;SPAC22A12.15C;SPAC57A10.02;SPAC17A5.16;SPAC23C11.11;SPAC23C11.17;SPAC4G9.04C;SPAC23H3.03C;SPACUNK4.11C;SPAC6G10.04C;SPAC3A11.12C;SPAC328.06;SPAC15E1.04;SPAC2C4.04C;SPAC30.04C;SPAC4F10.10C;SPAC29A4.18;SPAC26F1.13C;SPAC4D7.14;SPAC922.03;SPAC24B11.09;SPAC806.04C;SPAC24H6.10C;SPAC13A11.05;SPA…
SPAC27E2.03c	Transcript Features		mRNA stabilities	Lower	33.4546	38.0718	1.6473e-07	SPAC13G6.03;SPAC24B11.10C;SPAC806.05;SPAC12G12.16C;SPAC630.03;SPAC1751.04;SPAC31A2.09C;SPAC24H6.09;SPAC24H6.02C;SPAC227.08C;SPAC2F7.07C;SPAC1D4.05C;SPAC2G11.15C;SPAC521.04C;SPAC22H12.03;SPAC23C4.08;SPAC23C4.10;SPAC22A12.15C;SPAC56E4.05;SPAC57A10.02;SPAC3A12.04C;SPAC167.03C;SPAC17A5.16;SPAC17H9.19C;SPAC3C7.09;SPAC25A8.03C;SPAC23C11.11;SPAC23C11.17;SPAC4G9.04C;SPAC23H3.03C;SPAC823.07;SPAC6F6.13C;SP…
SPAC343.17c	Transcript Features		Ribosome occupancy (%)	Lower	75.8585	77.675	5.38221e-07	SPAC13G6.03;SPAC24B11.10C;SPAC12G12.16C;SPAC630.03;SPAC1751.04;SPAC31A2.09C;SPAC24H6.09;SPAC24H6.02C;SPAC227.08C;SPAC1D4.05C;SPAC2G11.15C;SPAC521.04C;SPAC22H12.03;SPAC23C4.08;SPAC22A12.15C;SPAC56E4.05;SPAC57A10.02;SPAC167.03C;SPAC17H9.19C;SPAC25A8.03C;SPAC23C11.11;SPAC4G9.04C;SPAC823.07;SPAC6F6.13C;SPAC6G10.04C;SPAC3A11.12C;SPAC328.06;SPAC1B1.02C;SPAC15E1.04;SPAC2C4.04C;SPAC30.04C;SPAPYUG7.03C;SP…
SPAC22G7.04
SPBC577.05c
SPAP27G11.10c
SPBC16E9.06c
SPAC11H11.06
SPCC132.02
SPAC31A2.10
SPAC1B3.16c
SPBC146.13c
SPCC569.07
SPAC24B11.10c
SPCP25A2.02c
SPBC17A3.03c
SPBC119.09c
SPBC106.11c
SPAPB24D3.09c
SPAC27D7.14c
SPAC4G8.12c
SPCC550.15c
SPBC28F2.07
SPAC13G6.11c
SPAC222.05c
SPBC17D11.07c
SPBC13G1.14c
SPAC6F6.07c
SPAC12B10.06c
SPBC106.18
SPBC1105.15c
SPAC323.02c
SPBC2G5.06c
SPBC2D10.05
SPCC4G3.13c
SPAC17A2.14
SPAC56F8.02
SPBC428.20c
SPBTRNAASP.04
SPBC36.05c
SPAC2F3.09
SPBC16H5.14c
SPCC584.05
SPAC630.10
SPAC29A4.10
SPAC17H9.09c
SPAC13A11.03
SPBC4F6.17c
SPBC4C3.09
SPCC777.02
SPCC550.01c
SPAC12G12.15
SPBC16H5.11c
SPCC1235.04c
SPAC343.13
SPBC146.09c
SPBC1683.06c
SPBC1604.20c
SPBC3B8.10c
SPAC1071.01c
SPBTRNAARG.04
SPCC16A11.09c
SPBC211.03c
SPCC645.09
SPSNORNA.32
SPCC576.05
SPCC10H11.01
SPAC637.06
SPAC27F1.09c
SPAC13A11.05
SPBC27.02c
SPBC27B12.09c
SPCC330.10
SPAC823.06
SPAC23A1.08c
SPAC23G3.02c
SPAC23C4.14
SPCC1672.02c
SPAC17C9.10
SPBC1604.12
SPBC28F2.02
SPAC22A12.12c
SPBC1734.05c
SPAC4F8.02c
SPAC3A11.08
SPBC115.03
SPBC1778.03c
SPAC17H9.14c
SPCC757.11c
SPAC521.02
SPBC9B6.11c
SPCC794.10
SPAC10F6.13c
SPAC17G6.12
SPAC29A4.09
SPCC1620.08
SPAC13G7.11
SPAPB1E7.02c
SPBC16G5.11c
SPAC3A12.19
SPAPB17E12.04c
SPAC17A2.12
SPAC3H5.08c
SPCC24B10.10c
SPAC26F1.09
SPAC3H1.02c
SPBC17G9.05
SPBC211.08c
SPBC31E1.03
SPAC24C9.10c
SPAC1782.05
SPAC227.08c
SPAC13F5.06c
SPBC16D10.07c
SPBC2F12.08c
SPBC1604.13c
SPAC9E9.08
SPAC31G5.19
SPCC663.05c
SPBC12C2.11
SPBC29A3.02c
SPAC23G3.05c
SPAC22F3.10c
SPBC800.12c
SPAC17A5.09c
SPAC328.07c
SPAC3G9.16c
SPAC23H3.06
SPCC825.03c
SPAC25A8.01c
SPAC17G8.07
SPAC1F7.06
SPCC306.03c
SPAC1805.11c
SPBC800.07c
SPBC691.04
SPCC2H8.02
SPAC19A8.09
SPAC6B12.11
SPCC126.06
SPAC15A10.12c
SPBC2A9.09
SPAC29A4.18
SPCC1442.07c
SPAC1071.05
SPAC167.03c
SPAC10F6.08c
SPAC513.01c
SPBC23G7.15c
SPAC823.15
SPCC16C4.16c
SPBC11C11.08
SPCC757.05c
SPCTRNAGLU.09
SPAC630.03
SPAC630.09c
SPCC553.09c
SPAC22F8.11
SPSNORNA.19
SPBC1734.15
SPBC1347.07
SPBC557.04
SPBC29A3.17
SPAP8A3.06
SPAC4A8.03c
SPBC21C3.17c
SPAC14C4.06c
SPBC15C4.03
SPBC405.07
SPAC323.05c
SPBC2A9.03
SPAC30D11.11
SPAC23A1.12c
SPCC1322.04
SPAC56E4.05
SPAC22F8.06
SPAC12G12.16c
SPAC57A7.13
SPAC1834.11c
SPBC3H7.02
SPAC24C9.13c
SPAC17A5.14
SPAC167.04
SPSNORNA.22
SPBC1709.05
SPAC30D11.08c
SPCC594.07c
SPAC6F6.13c
SPAC664.12c
SPAC22F3.03c
SPAC4D7.14
SPBC20F10.04c
SPBC660.15
SPAC23C4.08
SPCC794.03
SPBC582.04c
SPBC3B9.08c
SPBC1604.19c
SPCC320.04c
SPAC1783.01
SPAC4G9.15
SPCC1494.04c
SPBC119.10
SPBC25D12.05
SPCC1281.02c
SPAC1851.04c
SPBC530.07c
SPAC1486.03c
SPAC17H9.19c
SPAC6C3.08
SPBC211.01
SPAC10F6.16
SPAC19A8.13
SPAC3G6.10c
SPBC3B8.02
SPAC222.19
SPAC17C9.15c
SPBC21D10.09c
SPAC3G6.01
SPAC1F5.05c
SPAC11E3.01c
SPCC553.04
SPCC191.05c
SPAP14E8.03
SPAC6B12.19
SPSNRNA.01
SPAC31A2.09c
SPBC8E4.03
SPAC664.02c
SPBC16E9.07
SPAC6F12.05c
SPSNORNA.16
SPAC18G6.15
SPBTRNAGLY.04
SPAC24B11.13
SPBC18E5.14c
SPBC1685.02c
SPCC736.10c
SPAC589.12
SPBC25H2.11c
SPAC823.12
SPCC1322.05c
SPAC20H4.07
SPBC336.14c
SPBC3B8.08
SPAC1F5.09c
SPAC23H4.02
SPAC2F7.02c
SPAC22E12.11c
SPCP25A2.03
SPAC22H10.05c
SPAC1805.14
SPCC417.08
SPBC1A4.09
SPAC12G12.12
SPBC2G5.05
SPAC806.04c
SPAC9E9.11
SPBC16H5.04
SPBC1734.10c
SPBC651.11c
SPAC8F11.02c
SPAC823.11
SPCC24B10.16c
SPAC16.01
SPBC146.05c
SPCP1E11.02
SPBC18H10.03
SPBC17D1.04
SPAP27G11.12
SPCC16A11.07
SPAC18B11.07c
SPAC6F6.02c
SPBC800.04c
SPAC1527.02
SPAC1002.15c
SPBC15D4.06
SPAC23G3.08c
SPAC1486.02c
SPAC17A5.16
SPAC644.18c
SPAC3A12.17c
SPBC19F5.04
SPAC11E3.09
SPAC821.11
SPAC2E1P5.02c
SPSNORNA.50
SPAC1142.01
SPAC637.08
SPBC2G2.06c
SPAP27G11.16
SPBP16F5.07
SPCC1281.08
SPCC18.15
SPAC31F12.01
SPCC11E10.07c
SPBTRNATHR.06
SPCC757.10
SPAC1952.03
SPAC15E1.04
SPAC18G6.06
SPBC660.13c
SPCC584.14
SPBC36B7.04
SPCC1259.09c
SPBC25D12.06
SPAC20G4.04c
SPAC1527.01
SPAC22H12.04c
SPBC36B7.03
SPBC12D12.08c
SPCC1919.01
SPBC1677.02
SPAC1B1.02c
SPAC3C7.09
SPAC1006.02
SPAC26A3.08
SPAC1D4.14
SPAC24H6.09
SPAC823.07
SPAC222.16c
SPAC139.03
SPAC1782.03
SPCC777.03c
SPAC343.16
SPAC31G5.07
SPBC146.14c
SPBC3H7.15
SPBC1734.07c
SPAC26F1.13c
SPAC890.03
SPBC582.08
SPSNORNA.40
SPAC1A6.05c
SPAPB2B4.02
SPCC1795.07
SPBC428.06c
SPBC32F12.06
SPAC23E2.01
SPBC1604.03c
SPBC36.09
SPAPJ760.02c
SPCC4B3.14
SPBC21C3.03
SPBC16H5.07c
SPAC1783.06c
SPBC83.17
SPBC409.19c
SPBC2G2.17c
SPAC11G7.01
SPAC30.04c
SPAC1399.04c
SPAC23H4.17c
SPAC16C9.05
SPSNORNA.44
SPAC323.03c
SPCC895.05
SPBC12C2.01c
SPAC631.01c
SPAC13F5.01c
SPAC167.07c
SPSNORNA.26
SPAC13G6.14
SPCC1020.07
SPBC1604.05
SPBC6B1.10
SPBC1711.18
SPAC328.09
SPAC22G7.08
SPAC3A12.04c
SPBP8B7.31
SPCC11E10.04
SPAC1B3.09c
SPBC11B10.08
SPAC15E1.08
SPBC947.03c
SPAC20G8.01
SPAC2C4.15c
SPBC2D10.20
SPCC576.09
SPAC24C9.09
SPBC577.14c
SPAC24H6.11c
SPBC21.03c
SPAP14E8.04
SPBC354.12
SPACUNK4.12c
SPBC4.04c
SPAC458.07
SPCC18.02
SPAC57A10.02
SPCC18.05c
SPAC19B12.07c
SPAC23D3.06c
SPBC29A10.17
SPBC691.01
SPBC119.08
SPBC19G7.01c
SPBC119.13c
SPAC8F11.08c
SPCC4G3.10c
SPAC644.07
SPBP8B7.13
SPCC550.08
SPBC211.05
SPAC25H1.08c
SPBC336.12c
SPCC4G3.06c
SPBC2G2.10c
SPCC1235.15
SPAC11D3.10
SPCP31B10.07
SPBC119.01
SPAC227.16c
SPAC20H4.10
SPBC4B4.04
SPAC4F10.10c
SPCC1672.05c
SPAC589.08c
SPBC1921.07c
SPAC22F3.06c
SPAC23H3.02c
SPBC660.12c
SPAC24B11.09
SPBC1A4.11c
SPAC2F7.07c
SPAC4F8.15
SPCC1739.12
SPBC543.05c
SPCC1494.09c
SPCTRNAGLN.06
SPBC2D10.08c
SPBC3H7.12
SPAC29A4.16
SPBC17D1.05
SPAC806.05
SPAC8C9.06c
SPBC342.05
SPAC1071.02
SPAC1D4.10
SPAC22A12.04c
SPAC12G12.17
SPBC83.14c
SPBTRNAGLN.04
SPAC664.14
SPAC1687.04
SPAC5H10.10
SPCC290.04
SPBC1921.03c
SPBC428.08c
SPCC23B6.03c
SPAC25A8.03c
SPAC13D6.01
SPCC663.10
SPBC83.10
SPATRNALYS.01
SPAC1952.10c
SPBC13E7.01
SPCC663.12
SPAC1002.18
SPBC21.01
SPBC16G5.06
SPBC800.11
SPAC644.06c
SPCC4G3.04c
SPBC31F10.04c
SPCC18.06c
SPBC1539.08
SPCPB16A4.05c
SPCC1672.03c
SPCC5E4.03c
SPAC17G8.02
SPBC31F10.09c
SPBC1685.07c
SPAC144.06
SPBC19G7.16
SPCC162.03
SPAC3H5.11
SPCC594.03
SPBP4H10.16c
SPBP23A10.06
SPBC12D12.04c
SPAC922.03
SPCC1442.06
SPAC31A2.06
SPCC757.04
SPCC645.13
SPBC2D10.06
SPAC144.18
SPAC22E12.05c
SPBC30D10.04
SPAC1002.08c
SPBC16A3.01
SPAC23C11.11
SPBC21B10.05c
SPBC19G7.09
SPAC926.09c
SPCP1E11.06
SPBC15D4.03
SPCC297.05
SPCC1672.11c
SPCC297.03
SPAC8E11.03c
SPAC16E8.07c
SPAC3A12.18
SPBC30B4.07c
SPCC1795.02c
SPCC16A11.03c
SPAC19A8.14
SPAC1687.15
SPBC2G5.02c
SPAC23A1.02c
SPAC3F10.13
SPCC24B10.11c
SPAC3G6.08
SPBC20F10.06
SPAC2C4.04c
SPAC6G10.02c
SPCC663.17
SPBC1105.02c
SPBC776.18c
SPBC839.09c
SPAC23C11.17
SPCC970.07c
SPBP8B7.10c
SPAC22A12.15c
SPBC1652.02
SPAC17G8.03c
SPBC30B4.02c
SPBC20F10.05
SPBC1348.10c
SPSNORNA.43
SPAC105.03c
SPBC17D11.04c
SPBC337.11
SPCC338.06c
SPCC1393.11
SPAC24H6.06
SPAC14C4.04
SPBP22H7.07
SPBC15D4.04
SPCC970.02
SPCC18B5.08c
SPAC4F10.12
SPBC4C3.10c
SPCC550.02c
SPAC3A11.11c
SPAC13A11.01c
SPBC83.12
SPBC31F10.06c
SPATRNAARG.01
SPBC32H8.11
SPBC25B2.08
SPAC3H8.08c
SPBC11B10.09
SPAC3G6.06c
SPBC31F10.16
SPAC57A7.11
SPBC30D10.02
SPCC830.09c
SPAC652.01
SPCC16C4.01
SPCC1020.01c
SPAC16E8.13
SPCC63.11
SPAC664.03
SPAC222.17
SPAC29A4.08c
SPBC14C8.06
SPBC21B10.08c
SPBC3B9.11c
SPBC21B10.13c
SPAC607.10
SPAC17G6.16c
SPCC1450.11c
SPBC646.16
SPBC19C2.08
SPCC24B10.06
SPAC8E11.05c
SPAC23C4.10
SPCC417.12
SPBC11B10.10c
SPCC594.02c
SPAC6G10.10c
SPCC70.07c
SPBC1105.09
SPAC6G9.07c
SPBC17D1.01
SPAC13C5.03
SPCC1223.06
SPBC1A4.10c
SPAC1F3.04c
SPAC3A11.12c
SPAC2F3.06c
SPAC1952.14c
SPAC22A12.03c
SPBP4H10.05c
SPBC839.10
SPCC594.01
SPAC9E9.12c
SPBP8B7.08c
SPBC18E5.10
SPAC3A11.02
SPCP31B10.04
SPAC110.02
SPAC6F6.10c
SPBC582.05c
SPBC2G5.07c
SPAC458.04c
SPAC20H4.04
SPAC20G4.08
SPCC594.05c
SPBP26C9.02c
SPBC16E9.03c
SPAP27G11.06c
SPAC9E9.10c
SPAC3A11.04
SPAC3G9.15c
SPBC106.07c
SPAC4C5.02c
SPBC25H2.03
SPBC30B4.01c
SPAC29A4.06c
SPCC777.13
SPBC336.06c
SPBC3E7.06c
SPAC1D4.05c
SPCC830.06
SPCC830.05c
SPBC119.11c
SPBC23E6.02
SPBC646.03
SPCC794.06
SPCC1020.12c
SPBC1734.12c
SPBC2A9.04c
SPAC2C4.10c
SPAC3H8.04
SPBC409.20c
SPAC8C9.05
SPBC887.02
SPAC23D3.08
SPAC6G10.04c
SPAC23A1.04c
SPCC188.09c
SPBTRNAHIS.02
SPCC553.12c
SPBC146.10
SPAC13G7.10
SPAC328.01c
SPAC821.05
SPAC23H4.16c
SPCC613.03
SPBC365.05c
SPAC24B11.06c
SPAC1B3.18c
SPBC16E9.08
SPAC9E9.14
SPBC23G7.04c
SPBC13G1.13
SPBC215.14c
SPCC613.11c
SPCC1235.10c
SPCC613.09
SPBC215.01
SPBC216.04c
SPAC2C4.16c
SPAPYUG7.04c
SPAC29A4.14c
SPBC3B8.04c
SPBC725.07
SPAC56E4.07
SPAC23D3.04c
SPAC18G6.05c
SPAP8A3.10
SPBC1683.02
SPBC1289.11
SPNCRNA.499
SPAC30D11.14c
SPBC530.09c
SPCC757.12
SPBC1709.08
SPAC6F6.04c
SPAC22H10.09
SPBC19C2.10
SPBC83.11
SPCC306.05c
SPAC6B12.16
SPBC16A3.03c
SPAC19A8.12
SPAC57A7.15c
SPAC694.05c
SPBC215.12
SPCC1223.11
SPAC1834.06c
SPBC530.02
SPAC343.15
SPBC18E5.12c
SPAC31A2.08
SPBC947.13
SPBC1703.04
SPBC8D2.07c
SPBC16E9.01c
SPAC2E1P3.02c
SPBC1685.03
SPCC18.19c
SPAC4G9.04c
SPAC31G5.06
SPBC29A3.14c
SPSNORNA.52
SPAC9E9.03
SPAC31A2.04c
SPAPB1A11.04c
SPAC2F7.08c
SPAC3F10.10c
SPBC3D6.05
SPBC660.11
SPBP35G2.09
SPBC776.06c
SPBC106.12c
SPBC1706.01
SPAC13G6.03
SPAC4G9.06c
SPBC14C8.15
SPBC428.04
SPBC18H10.11c
SPCC24B10.04
SPBC2F12.02c
SPAC24H6.02c
SPAC328.06
SPBC2F12.10
SPAC3A12.16c
SPBC19G7.10c
SPAC14C4.16
SPBC19C2.06c
SPBC1289.09
SPAC688.06c
SPAC959.02
SPBC1539.01c
SPCC63.12c
SPBC17D11.03c
SPBC365.01
SPCC24B10.20
SPCC74.09
SPSNORNA.17
SPAC2C4.09
SPBC530.05
SPAC1565.08
SPBC2A9.08c
SPBC16G5.02c
SPAC25B8.04c
SPBC24C6.13
SPAC824.03c
SPAC17A5.10
SPAC25G10.02
SPCC74.02c
SPAC664.05
SPAC890.06
SPCC1884.02
SPCC70.09c
SPAC25B8.02
SPAC23C4.18c
SPBC20F10.07
SPAC922.04
SPBC23E6.01c
SPBC18E5.07
SPAC4G9.17c
SPAC4G8.08
SPBC409.18
SPAC1751.04
SPCPB16A4.02c
SPAPYUG7.03c
SPBC405.03c
SPBC21D10.05c
SPBC29A3.04
SPAC1F7.11c
SPAC6F12.11c
SPBC3E7.10
SPCC645.04
SPBP35G2.10
SPBC21D10.06c
SPBC1198.09
SPAC4F10.19c
SPBC15D4.13c
SPBC215.07c
SPAPYUG7.06
SPAP27G11.09c
SPCC16A11.14
SPBC13G1.02
SPBC1347.06c
SPAC2H10.02c
SPAC3C7.11c
SPSNORNA.27
SPCC1672.09
SPAC824.05
SPAC23H3.03c
SPBC25H2.06c
SPAC13G7.12c
SPCC1235.11
SPAC1F7.10
SPACUNK4.11c
SPCC1322.11
SPAC3C7.06c
SPCC330.02
SPCC645.07
SPAC664.07c
SPCC11E10.06c
SPAC17G6.08
SPSNORNA.03
SPAC24H6.12c
SPAC22H10.12c
SPAC644.09
SPCC1442.14c
SPBP8B7.30c
SPAC1D4.12
SPAC9G1.06c
SPCC777.10c
SPCC1281.05
SPAC458.03
SPNCRNA.82
SPCC16C4.10
SPAC24H6.10c
SPAPB1E7.07
SPBC211.06
SPBC20F10.02c
SPAC13G7.03
SPBC21C3.16c
SPAC27F1.08
SPCC1795.09
SPAPB2B4.07
SPAC343.10
SPCC24B10.17
SPSNORNA.24
SPAC1B3.17
SPAC29A4.04c
SPBC1289.01c
SPAC637.09
SPBC14C8.17c
SPBC1773.15
SPBC28F2.10c
SPCC757.08
SPBC16C6.13c
SPCC63.06
SPBC4B4.03
SPBC365.09c
SPAC4A8.16c
SPBC646.15c
SPBC21B10.06c
SPAC869.10c
SPCC757.13
SPAC1B3.10c
SPBC106.04
SPAC23H3.08c
SPAC2F3.01
SPCC1827.06c
SPBC18E5.13
SPBC15D4.14
SPCC1682.10
SPBC1921.02
SPBC1198.04c
SPAC1002.11
SPAC922.06
SPAC2G11.15c
SPAC1A6.08c
SPAC31A2.11c
SPCC31H12.05c
SPAC4F10.04
SPBC405.05
SPAC6F6.09
SPBC577.08c
SPAC5H10.05c
SPCC24B10.13
SPAC2F7.10
SPBC13E7.10c
SPCC1259.07
SPAC1687.13c
SPAC23H3.07c
SPBC651.12c
SPBC1539.09c
SPCC132.01c
SPAC29B12.14c
SPBTRNAGLN.03
SPAC630.14c
SPAC3A12.14
SPBC106.01
SPBP16F5.04
SPCC18B5.06
SPBC3E7.12c
SPAC26F1.08c
SPCC777.05
SPBC725.04
SPBC16G5.08
SPBC691.05c
SPCC1259.06
SPBPJ4664.01
SPCC31H12.03c
SPCTRNATHR.10
SPBC83.07
SPBPB2B2.14c
SPAC3A12.03c
SPCC1795.10c
SPAC589.03c
SPBC18E5.02c
SPCC24B10.12
SPBC16G5.13
SPBC24C6.07
SPAC22H10.03c
SPCC1322.06
SPBC1215.01
SPCC1259.12c
SPBC646.06c
SPCC895.04c
SPAC343.18
SPAP27G11.07c
SPAPB1A10.15
SPBC56F2.11
SPCC576.02
SPAC22A12.08c
SPBC17A3.05c
SPAC4H3.09
SPAC8C9.08
SPAC5H10.11
SPAC7D4.12c
SPAC24C9.16c
SPAC26F1.02
SPAC16E8.05c
SPAC30C2.03
SPBTRNAGLY.05
SPCC1620.01c
SPCC1682.15
SPBC29A3.08
SPCC14G10.01

## Sheet: cluster 2
S3_3 Table. Cluster 2, functional enrichments.
Data were grouped into clusters as described. Gene group enrichments were determined for each cluster using AnGeLi.
cluster_2	Category_Name	External_ID	GeneSet_Name	over_represented/under_represented	List_Frequency	Background_Frequency	Corrected_pvalue	Genes_In_Common/Interacting_Gene_Pair
SPBC2D10.12	GO Biological Process	GO:0002181	cytoplasmic translation	Enriched	18.5643564356436 (75/404)	4.79065238558909 (246/5135)	3.59439e-24	SPAPB17E12.13;SPAC3H5.05C;SPAC57A7.12;SPCC74.05;SPCC285.15C;SPCC364.03;SPBC577.12;SPAC2F7.13C;SPAC3G9.09C;SPAC6G9.09C;SPAC31G5.03;SPAC29E6.06C;SPAC16E8.15;SPAC3H5.07;SPAC17A5.15C;SPBC2G2.12;SPBC342.02;SPAC3A12.13C;SPBP8B7.06;SPBC11C11.07;SPAC29A4.02C;SPCC1183.08C;SPBC17D11.05;SPAC4D7.09;SPCP31B10.08C;SPBC14F5.06;SPBC365.03C;SPBC1773.10C;SPBC685.06;SPCC1223.05C;SPBC4C3.07;SPAC13G6.02C;SPBC18H10.13…
SPAC1B1.03c	GO Biological Process	GO:0044249	cellular biosynthetic process	Enriched	50.2475247524753 (203/404)	29.8928919182084 (1535/5135)	2.00389e-16	SPAPB17E12.13;SPAC3H5.05C;SPAC16.03C;SPAC23C4.15;SPAC9E9.06C;SPAC343.01C;SPBP8B7.17C;SPBC11B10.02C;SPAC1B3.12C;SPAC57A7.12;SPCC4B3.07;SPCC74.05;SPBC215.09C;SPCC285.15C;SPAC56F8.04C;SPBC1271.04C;SPCC4B3.18;SPCC364.03;SPAC24C9.03;SPBC577.12;SPBC713.12;SPBC1677.03C;SPBC6B1.08C;SPAC23G3.04;SPBC428.18;SPAC20G4.07C;SPAC2F7.13C;SPAC3G9.09C;SPAC6G9.09C;SPAC31G5.03;SPAC222.08C;SPAC29E6.06C;SPBC27.08C;SPAC…
SPAC1071.12c	GO Biological Process	GO:1901576	organic substance biosynthetic process	Enriched	50.4950495049505 (204/404)	30.2044790652386 (1551/5135)	2.58092e-16	SPAPB17E12.13;SPAC3H5.05C;SPAC16.03C;SPAC23C4.15;SPAC9E9.06C;SPAC343.01C;SPBP8B7.17C;SPBC11B10.02C;SPAC1B3.12C;SPAC57A7.12;SPCC4B3.07;SPCC74.05;SPBC215.09C;SPCC285.15C;SPAC56F8.04C;SPBC1271.04C;SPCC4B3.18;SPCC364.03;SPAC24C9.03;SPBC577.12;SPBC713.12;SPBC1677.03C;SPBC6B1.08C;SPAC23G3.04;SPBC428.18;SPAC20G4.07C;SPAC2F7.13C;SPAC3G9.09C;SPAC6G9.09C;SPAC31G5.03;SPAC222.08C;SPAC29E6.06C;SPBC27.08C;SPAC…
SPAC18G6.07c	GO Biological Process	GO:0009058	biosynthetic process	Enriched	50.7425742574257 (205/404)	30.6329113924051 (1573/5135)	5.91125e-16	SPAPB17E12.13;SPAC3H5.05C;SPAC16.03C;SPAC23C4.15;SPAC9E9.06C;SPAC343.01C;SPBP8B7.17C;SPBC11B10.02C;SPAC1B3.12C;SPAC57A7.12;SPCC4B3.07;SPCC74.05;SPBC215.09C;SPCC285.15C;SPAC56F8.04C;SPBC1271.04C;SPCC4B3.18;SPCC364.03;SPAC24C9.03;SPBC577.12;SPBC713.12;SPBC1677.03C;SPBC6B1.08C;SPAC23G3.04;SPBC428.18;SPAC20G4.07C;SPAC2F7.13C;SPAC3G9.09C;SPAC6G9.09C;SPAC31G5.03;SPAC222.08C;SPAC29E6.06C;SPBC27.08C;SPAC…
SPBC337.09	GO Biological Process	GO:0042254	ribosome biogenesis	Enriched	17.8217821782178 (72/404)	6.15384615384615 (316/5135)	3.17634e-15	SPCC18.12C;SPAC3H5.05C;SPBC1703.05;SPAC959.03C;SPBC30D10.15;SPCC285.15C;SPBC23E6.05;SPCC16C4.08C;SPBC115.01C;SPAC31G5.03;SPBC1604.06C;SPAC1782.10C;SPAC17H9.02;SPBC11G11.03;SPCC320.11C;SPBC646.10C;SPAC3A12.13C;SPAC20H4.01;SPAC18G6.07C;SPAC23G3.06;SPBC14F5.06;SPAC8C9.10C;SPAC10F6.10;SPAC140.02;SPBC685.06;SPBC1105.01;SPBC16H5.08C;SPAC607.03C;SPAC13G6.02C;SPBC18H10.13;SPAC26A3.17C;SPBP16F5.06;SPAC24H…
SPAC30D11.12	GO Biological Process	GO:0022613	ribonucleoprotein complex biogenesis	Enriched	19.0594059405941 (77/404)	7.20545277507303 (370/5135)	4.83416e-14	SPCC18.12C;SPAC3H5.05C;SPBC1703.05;SPAC959.03C;SPBC30D10.15;SPCC285.15C;SPBC23E6.05;SPCC16C4.08C;SPBC115.01C;SPAC31G5.03;SPBC1604.06C;SPAC1782.10C;SPAC17H9.02;SPBC11G11.03;SPCC320.11C;SPBC646.10C;SPAC3A12.13C;SPAC20H4.01;SPAC18G6.07C;SPAC23G3.06;SPBC17D11.05;SPBC14F5.06;SPAC8C9.10C;SPAC10F6.10;SPAC140.02;SPBC685.06;SPBC1105.01;SPBC16H5.08C;SPBC4C3.07;SPAC607.03C;SPAC13G6.02C;SPBC18H10.13;SPAC26A3…
SPAC977.11	GO Biological Process	GO:0044283	small molecule biosynthetic process	Enriched	15.3465346534653 (62/404)	5.06329113924051 (260/5135)	7.53545e-14	SPAC9E9.06C;SPAC343.01C;SPBP8B7.17C;SPBC11B10.02C;SPBC215.09C;SPAC56F8.04C;SPBC1271.04C;SPAC24C9.03;SPBC713.12;SPBC1677.03C;SPAC20G4.07C;SPAC222.08C;SPBC27.08C;SPBC646.07C;SPBC106.15;SPAC17G8.06C;SPBC23E6.10C;SPCC1442.09;SPBC106.17C;SPBC1711.13;SPBC839.16;SPCC1739.06C;SPAC20G8.07C;SPAC22A12.10;SPBC36.04;SPBC23E6.06C;SPAC10F6.01C;SPAC1B2.03C;SPAP7G5.04C;SPAC31G5.04;SPCC1223.08C;SPBC4C3.03;SPCC1223…
SPCC569.05c	GO Biological Process	GO:0006412	translation	Enriched	18.8118811881188 (76/404)	7.30282375851996 (375/5135)	3.47042e-13	SPAPB17E12.13;SPAC3H5.05C;SPAC57A7.12;SPCC74.05;SPCC285.15C;SPCC364.03;SPBC577.12;SPAC2F7.13C;SPAC3G9.09C;SPAC6G9.09C;SPAC31G5.03;SPAC29E6.06C;SPAC16E8.15;SPAC3H5.07;SPAC17A5.15C;SPBC2G2.12;SPAC27E2.02;SPBC342.02;SPAC3A12.13C;SPBP8B7.06;SPBC11C11.07;SPAC29A4.02C;SPCC1183.08C;SPBC17D11.05;SPAC4D7.09;SPCP31B10.08C;SPBC14F5.06;SPBC365.03C;SPBC1773.10C;SPBC685.06;SPCC1223.05C;SPBC4C3.07;SPAC13G6.02C;…
SPAC3H5.07	GO Biological Process	GO:0044238	primary metabolic process	Enriched	72.7722772277228 (294/404)	54.8782862706913 (2818/5135)	4.62214e-12	SPAPB17E12.13;SPAPB18E9.01;SPCC18.12C;SPAC3H5.05C;SPAC1786.02;SPAC16.03C;SPBC1703.05;SPAC23C4.15;SPAC959.03C;SPAC9E9.06C;SPBC776.04;SPBC30D10.15;SPAC343.01C;SPBC11B10.02C;SPAC343.09;SPAC1B3.12C;SPAC57A7.12;SPCC4B3.07;SPCC1753.04;SPCC74.05;SPBC215.09C;SPCC285.15C;SPAC1A6.10;SPAC25B8.17;SPAC56F8.04C;SPBC1271.04C;SPCC4B3.18;SPBP8B7.21;SPCC364.03;SPAC24C9.03;SPBC577.12;SPBC713.12;SPAC16C9.06C;SPBC167…
SPAC20G4.01	GO Biological Process	GO:0044281	small molecule metabolic process	Enriched	24.7524752475248 (100/404)	11.6650438169426 (599/5135)	5.9414e-12	SPAC16.03C;SPAC9E9.06C;SPAC343.01C;SPBP8B7.17C;SPBC11B10.02C;SPBC215.09C;SPAC56F8.04C;SPCC4B3.18;SPBC1271.04C;SPAC24C9.03;SPBC713.12;SPBC1677.03C;SPAC20G4.07C;SPAC2F7.13C;SPAC56E4.03;SPAC222.08C;SPAC29E6.06C;SPBC27.08C;SPBC646.07C;SPAC17A5.15C;SPBC2G2.12;SPAC144.03;SPBC106.15;SPAC17G8.06C;SPBC23E6.10C;SPBC342.02;SPCC1442.09;SPBC106.17C;SPCC24B10.21;SPBC2F12.14C;SPBC1711.13;SPBC839.16;SPCC1739.06C…
SPCC1672.07	GO Biological Process	GO:0071704	organic substance metabolic process	Enriched	75.2475247524752 (304/404)	57.6436222005842 (2960/5135)	6.10633e-12	SPAPB17E12.13;SPAPB18E9.01;SPCC18.12C;SPAC3H5.05C;SPAC1786.02;SPAC16.03C;SPBC1703.05;SPAC23C4.15;SPAC959.03C;SPAC9E9.06C;SPBC776.04;SPBC30D10.15;SPAC343.01C;SPBP8B7.17C;SPBC11B10.02C;SPAC343.09;SPAC1B3.12C;SPAC57A7.12;SPCC4B3.07;SPCC1753.04;SPCC74.05;SPBC215.09C;SPCC285.15C;SPAC1A6.10;SPAC25B8.17;SPAC56F8.04C;SPBC1271.04C;SPCC4B3.18;SPBP8B7.21;SPCC364.03;SPAC24C9.03;SPBC577.12;SPBC713.12;SPAC16C9…
SPBC23E6.06c	GO Biological Process	GO:0044237	cellular metabolic process	Enriched	74.7524752475248 (302/404)	57.2346640701071 (2939/5135)	9.31009e-12	SPAPB17E12.13;SPAPB18E9.01;SPCC18.12C;SPAC3H5.05C;SPAC1786.02;SPAC16.03C;SPBC1703.05;SPAC23C4.15;SPAC959.03C;SPAC9E9.06C;SPBC776.04;SPBC30D10.15;SPAC343.01C;SPBP8B7.17C;SPBC11B10.02C;SPAC343.09;SPAC1B3.12C;SPAC57A7.12;SPCC4B3.07;SPCC1753.04;SPCC74.05;SPBC215.09C;SPCC285.15C;SPAC1A6.10;SPAC25B8.17;SPAC56F8.04C;SPBC1271.04C;SPCC4B3.18;SPBP8B7.21;SPCC364.03;SPAC24C9.03;SPBC577.12;SPBC713.12;SPAC16C9…
SPAC22E12.07	GO Biological Process	GO:0034660	ncRNA metabolic process	Enriched	16.3366336633663 (66/404)	6.27069133398247 (322/5135)	1.47118e-11	SPAPB18E9.01;SPCC18.12C;SPBC1703.05;SPAC959.03C;SPBC30D10.15;SPCC285.15C;SPAC1A6.10;SPAC2F7.13C;SPBC115.01C;SPAC29E6.06C;SPBC36.07;SPBC1604.06C;SPAC1782.10C;SPAC17H9.02;SPBC11G11.03;SPAC17A5.15C;SPBC2G2.12;SPBC646.10C;SPBC342.02;SPAC3A12.13C;SPAC20H4.01;SPAC18G6.07C;SPAC23G3.06;SPAC4C5.01;SPCC126.03;SPAC10F6.10;SPBC1773.10C;SPAC140.02;SPBC1105.01;SPAC607.03C;SPBC19C7.07C;SPAC3F10.03;SPCC1393.06C;…
SPBC342.06c	GO Biological Process	GO:1901566	organonitrogen compound biosynthetic process	Enriched	15.5940594059406 (63/404)	5.95910418695229 (306/5135)	4.6986e-11	SPAC16.03C;SPAC9E9.06C;SPBP8B7.17C;SPBC11B10.02C;SPBC1271.04C;SPCC4B3.18;SPBC1677.03C;SPAC222.08C;SPBC27.08C;SPAC144.03;SPAC17G8.06C;SPBC23E6.10C;SPCC1442.09;SPBC106.17C;SPBC2F12.14C;SPBC1711.13;SPBC839.16;SPCC1739.06C;SPAC22A12.10;SPBC36.04;SPAC6F12.10C;SPBC23E6.06C;SPAC10F6.01C;SPAC1B2.03C;SPAP7G5.04C;SPAC31G5.04;SPCC1795.05C;SPCC1223.08C;SPBC4C3.03;SPCC1223.14;SPAC56F8.10;SPAP7G5.02C;SPBC12C2.…
SPAC4F8.03	GO Biological Process	GO:0006996	organelle organization	Underrepresented	9.40594059405941 (38/404)	22.7069133398247 (1166/5135)	1.23816e-10	SPCC285.15C;SPAC23G3.04;SPAC20G4.07C;SPCC16C4.08C;SPAC17H9.02;SPBC11G11.03;SPCC320.11C;SPBC2G2.12;SPBC342.06C;SPBC1215.02C;SPAC20G8.07C;SPAC14C4.12C;SPAC14C4.11;SPAC664.01C;SPBC29A10.06C;SPBC2D10.11C;SPBC685.06;SPAC8E11.07C;SPBC18E5.03C;SPCC18.11C;SPCC1682.04;SPAC3F10.03;SPAC31G5.13;SPBC582.09;SPAC9E9.13;SPAC1F3.07C;SPCC4G3.14;SPBC3B9.05;SPAC22E12.07;SPAPB8E5.09;SPAC2F3.04C;SPBC16A3.11;SPAC13G7.0…
SPAC26F1.12c	GO Biological Process	GO:1902589	single-organism organelle organization	Underrepresented	4.7029702970297 (19/404)	15.5793573515093 (800/5135)	3.66122e-10	SPCC16C4.08C;SPAC17H9.02;SPBC2G2.12;SPBC342.06C;SPBC1215.02C;SPAC14C4.11;SPAC664.01C;SPAC8E11.07C;SPBC18E5.03C;SPCC18.11C;SPCC1682.04;SPAC3F10.03;SPAC31G5.13;SPAC9E9.13;SPAC22E12.07;SPBC16A3.11;SPBP8B7.12C;SPBC11C11.02;SPAC27F1.06C
SPBC29A10.06c	GO Biological Process	GO:0008152	metabolic process	Enriched	75.4950495049505 (305/404)	59.7663096397274 (3069/5135)	1.1832e-09	SPAPB17E12.13;SPAPB18E9.01;SPCC18.12C;SPAC3H5.05C;SPAC1786.02;SPAC16.03C;SPBC1703.05;SPAC23C4.15;SPAC959.03C;SPAC9E9.06C;SPBC776.04;SPBC30D10.15;SPAC343.01C;SPBP8B7.17C;SPBC11B10.02C;SPAC343.09;SPAC1B3.12C;SPAC57A7.12;SPCC4B3.07;SPCC1753.04;SPCC74.05;SPBC215.09C;SPCC285.15C;SPAC1A6.10;SPAC25B8.17;SPAC56F8.04C;SPBC1271.04C;SPCC4B3.18;SPBP8B7.21;SPCC364.03;SPAC24C9.03;SPBC577.12;SPBC713.12;SPAC16C9…
SPAC1B3.13	GO Biological Process	GO:0008652	cellular amino acid biosynthetic process	Enriched	8.41584158415842 (34/404)	2.29795520934761 (118/5135)	1.43212e-09	SPAC9E9.06C;SPBC11B10.02C;SPBC1271.04C;SPBC1677.03C;SPBC27.08C;SPAC17G8.06C;SPBC23E6.10C;SPCC1442.09;SPBC106.17C;SPBC1711.13;SPBC839.16;SPCC1739.06C;SPBC36.04;SPAC10F6.01C;SPAP7G5.04C;SPAC31G5.04;SPCC1223.08C;SPBC4C3.03;SPCC1223.14;SPAC56F8.10;SPAC17H9.13C;SPAC25G10.05C;SPAC13G7.06;SPAC16C9.02C;SPAC7D4.07C;SPAC1F12.07;SPAC23H3.09C;SPBC3B8.03;SPAC227.18;SPCC584.01C;SPBC21C3.08C;SPAC1782.11;SPBC2G2…
SPAC12G12.06c	GO Biological Process	GO:0016072	rRNA metabolic process	Enriched	10.6435643564356 (43/404)	3.46640701071081 (178/5135)	1.51764e-09	SPCC18.12C;SPBC1703.05;SPAC959.03C;SPBC30D10.15;SPCC285.15C;SPBC115.01C;SPBC1604.06C;SPAC1782.10C;SPAC17H9.02;SPBC11G11.03;SPBC646.10C;SPAC3A12.13C;SPAC20H4.01;SPAC18G6.07C;SPAC23G3.06;SPAC4C5.01;SPAC10F6.10;SPAC140.02;SPBC1105.01;SPAC607.03C;SPCC1393.06C;SPAC823.08C;SPBC409.15;SPBC23E6.04C;SPAC890.04C;SPCC1450.03;SPBC1347.13C;SPBC16H5.10C;SPBC1711.16;SPAC2F7.14C;SPAC12G12.06C;SPCC1672.07;SPAC56F…
SPAC17A5.15c	GO Biological Process	GO:0006364	rRNA processing	Enriched	10.3960396039604 (42/404)	3.36903602726388 (173/5135)	2.21974e-09	SPCC18.12C;SPBC1703.05;SPAC959.03C;SPBC30D10.15;SPCC285.15C;SPBC115.01C;SPBC1604.06C;SPAC1782.10C;SPAC17H9.02;SPBC11G11.03;SPBC646.10C;SPAC3A12.13C;SPAC20H4.01;SPAC18G6.07C;SPAC23G3.06;SPAC10F6.10;SPAC140.02;SPBC1105.01;SPAC607.03C;SPCC1393.06C;SPAC823.08C;SPBC409.15;SPBC23E6.04C;SPAC890.04C;SPCC1450.03;SPBC1347.13C;SPBC16H5.10C;SPBC1711.16;SPAC2F7.14C;SPAC12G12.06C;SPCC1672.07;SPAC56F8.09;SPBC71…
SPBC18H10.13	GO Biological Process	GO:0006520	cellular amino acid metabolic process	Enriched	11.3861386138614 (46/404)	3.93378773125609 (202/5135)	2.33023e-09	SPAC9E9.06C;SPBC11B10.02C;SPBC1271.04C;SPBC1677.03C;SPAC2F7.13C;SPAC56E4.03;SPAC29E6.06C;SPBC27.08C;SPAC17A5.15C;SPBC2G2.12;SPAC17G8.06C;SPBC23E6.10C;SPBC342.02;SPCC1442.09;SPBC106.17C;SPBC1711.13;SPBC839.16;SPCC1739.06C;SPBC36.04;SPAC10F6.01C;SPAP7G5.04C;SPAC31G5.04;SPBC1773.10C;SPCC1223.08C;SPBC4C3.03;SPCC1223.14;SPAC3F10.03;SPAC56F8.10;SPAC17H9.13C;SPBC1709.02C;SPAC25G10.05C;SPBC25H2.02;SPAC13…
SPBC23G7.07c	GO Biological Process	GO:0016043	cellular component organization	Underrepresented	13.6138613861386 (55/404)	27.2249269717624 (1398/5135)	2.33023e-09	SPBC30D10.15;SPCC285.15C;SPAC23G3.04;SPBC428.18;SPAC20G4.07C;SPCC16C4.08C;SPAC17H9.02;SPBC11G11.03;SPBC19G7.17;SPCC320.11C;SPBC2G2.12;SPAC227.05;SPBC342.06C;SPAC3A12.13C;SPBC1215.02C;SPBC17D11.05;SPAC20G8.07C;SPAC14C4.12C;SPAC14C4.11;SPAC664.01C;SPBC29A10.06C;SPBC2D10.11C;SPBC685.06;SPAC8E11.07C;SPAC1420.02C;SPBC18E5.03C;SPBC4C3.07;SPCC18.11C;SPCC1682.04;SPAC3F10.03;SPAC31G5.13;SPCC1235.16;SPBC58…
SPAC11D3.02c	GO Biological Process	GO:0034470	ncRNA processing	Enriched	13.3663366336634 (54/404)	5.25803310613437 (270/5135)	7.32086e-09	SPAPB18E9.01;SPCC18.12C;SPBC1703.05;SPAC959.03C;SPBC30D10.15;SPCC285.15C;SPAC1A6.10;SPBC115.01C;SPBC36.07;SPBC1604.06C;SPAC1782.10C;SPAC17H9.02;SPBC11G11.03;SPBC646.10C;SPAC3A12.13C;SPAC20H4.01;SPAC18G6.07C;SPAC23G3.06;SPCC126.03;SPAC10F6.10;SPAC140.02;SPBC1105.01;SPAC607.03C;SPBC19C7.07C;SPCC1393.06C;SPAC823.08C;SPBC409.15;SPBC23E6.04C;SPAC890.04C;SPCC1450.03;SPAC17D4.04;SPBC1347.13C;SPBC16H5.10…
SPAC19G12.05	GO Biological Process	GO:0010467	gene expression	Enriched	40.5940594059406 (164/404)	26.1927945472249 (1345/5135)	9.23289e-09	SPAPB17E12.13;SPAPB18E9.01;SPCC18.12C;SPAC3H5.05C;SPBC1703.05;SPAC23C4.15;SPAC959.03C;SPBC30D10.15;SPAC1B3.12C;SPAC57A7.12;SPCC4B3.07;SPCC74.05;SPCC285.15C;SPAC1A6.10;SPCC364.03;SPBC577.12;SPAC16C9.06C;SPBC6B1.08C;SPAC23G3.04;SPAC2F7.13C;SPAC3G9.09C;SPAC6G9.09C;SPBC115.01C;SPAC31G5.03;SPAC29E6.06C;SPBC36.07;SPBC1604.06C;SPAC1782.10C;SPAC17H9.02;SPAC16E8.15;SPBC11G11.03;SPAC3H5.07;SPAC17A5.15C;SPB…
SPCC970.03	GO Biological Process	GO:1901564	organonitrogen compound metabolic process	Enriched	19.8019801980198 (80/404)	9.63972736124635 (495/5135)	1.45998e-08	SPAC16.03C;SPAC9E9.06C;SPBP8B7.17C;SPBC11B10.02C;SPBC1271.04C;SPCC4B3.18;SPBC1677.03C;SPAC2F7.13C;SPAC56E4.03;SPAC222.08C;SPAC29E6.06C;SPBC27.08C;SPAC17A5.15C;SPBC2G2.12;SPAC144.03;SPAC17G8.06C;SPBC23E6.10C;SPBC342.02;SPCC1442.09;SPBC106.17C;SPCC24B10.21;SPBC2F12.14C;SPBC1711.13;SPBC839.16;SPCC1739.06C;SPAC22A12.10;SPBC36.04;SPAC6F12.10C;SPBC23E6.06C;SPAC10F6.01C;SPAC1B2.03C;SPAP7G5.04C;SPAC31G5.…
SPBC36B7.02	GO Biological Process	GO:0043436	oxoacid metabolic process	Enriched	14.3564356435644 (58/404)	5.99805258033106 (308/5135)	1.63268e-08	SPAC9E9.06C;SPBC11B10.02C;SPBC1271.04C;SPBC1677.03C;SPAC2F7.13C;SPAC56E4.03;SPAC29E6.06C;SPBC27.08C;SPBC646.07C;SPAC17A5.15C;SPBC2G2.12;SPAC144.03;SPAC17G8.06C;SPBC23E6.10C;SPBC342.02;SPCC1442.09;SPBC106.17C;SPCC24B10.21;SPBC1711.13;SPBC839.16;SPCC1739.06C;SPBC36.04;SPAC14C4.11;SPAC10F6.01C;SPAC1B2.03C;SPAP7G5.04C;SPAC31G5.04;SPBC1773.10C;SPCC1223.08C;SPBC4C3.03;SPCC1223.14;SPAC3F10.03;SPAC56F8.1…
SPBC17A3.04c	GO Biological Process	GO:0016053	organic acid biosynthetic process	Enriched	9.40594059405941 (38/404)	3.0379746835443 (156/5135)	1.67737e-08	SPAC9E9.06C;SPBC11B10.02C;SPBC1271.04C;SPBC1677.03C;SPBC27.08C;SPBC646.07C;SPAC17G8.06C;SPBC23E6.10C;SPCC1442.09;SPBC106.17C;SPBC1711.13;SPBC839.16;SPCC1739.06C;SPBC36.04;SPAC10F6.01C;SPAC1B2.03C;SPAP7G5.04C;SPAC31G5.04;SPCC1223.08C;SPBC4C3.03;SPCC1223.14;SPAC56F8.10;SPAC17H9.13C;SPAC25G10.05C;SPAC13G7.06;SPAC16C9.02C;SPAC7D4.07C;SPAC22A12.16;SPAC1F12.07;SPAC23H3.09C;SPBC3B8.03;SPAC227.18;SPCC584…
SPCPJ732.03	GO Biological Process	GO:0046394	carboxylic acid biosynthetic process	Enriched	9.40594059405941 (38/404)	3.0379746835443 (156/5135)	1.67737e-08	SPAC9E9.06C;SPBC11B10.02C;SPBC1271.04C;SPBC1677.03C;SPBC27.08C;SPBC646.07C;SPAC17G8.06C;SPBC23E6.10C;SPCC1442.09;SPBC106.17C;SPBC1711.13;SPBC839.16;SPCC1739.06C;SPBC36.04;SPAC10F6.01C;SPAC1B2.03C;SPAP7G5.04C;SPAC31G5.04;SPCC1223.08C;SPBC4C3.03;SPCC1223.14;SPAC56F8.10;SPAC17H9.13C;SPAC25G10.05C;SPAC13G7.06;SPAC16C9.02C;SPAC7D4.07C;SPAC22A12.16;SPAC1F12.07;SPAC23H3.09C;SPBC3B8.03;SPAC227.18;SPCC584…
SPAC1F7.13c	GO Biological Process	GO:0006082	organic acid metabolic process	Enriched	14.3564356435644 (58/404)	6.01752677702045 (309/5135)	1.74792e-08	SPAC9E9.06C;SPBC11B10.02C;SPBC1271.04C;SPBC1677.03C;SPAC2F7.13C;SPAC56E4.03;SPAC29E6.06C;SPBC27.08C;SPBC646.07C;SPAC17A5.15C;SPBC2G2.12;SPAC144.03;SPAC17G8.06C;SPBC23E6.10C;SPBC342.02;SPCC1442.09;SPBC106.17C;SPCC24B10.21;SPBC1711.13;SPBC839.16;SPCC1739.06C;SPBC36.04;SPAC14C4.11;SPAC10F6.01C;SPAC1B2.03C;SPAP7G5.04C;SPAC31G5.04;SPBC1773.10C;SPCC1223.08C;SPBC4C3.03;SPCC1223.14;SPAC3F10.03;SPAC56F8.1…
SPAC57A7.12	GO Biological Process	GO:0019752	carboxylic acid metabolic process	Enriched	14.1089108910891 (57/404)	5.92015579357351 (304/5135)	2.60575e-08	SPAC9E9.06C;SPBC11B10.02C;SPBC1271.04C;SPBC1677.03C;SPAC2F7.13C;SPAC56E4.03;SPAC29E6.06C;SPBC27.08C;SPBC646.07C;SPAC17A5.15C;SPBC2G2.12;SPAC144.03;SPAC17G8.06C;SPBC23E6.10C;SPBC342.02;SPCC1442.09;SPBC106.17C;SPCC24B10.21;SPBC1711.13;SPBC839.16;SPCC1739.06C;SPBC36.04;SPAC10F6.01C;SPAC1B2.03C;SPAP7G5.04C;SPAC31G5.04;SPBC1773.10C;SPCC1223.08C;SPBC4C3.03;SPCC1223.14;SPAC3F10.03;SPAC56F8.10;SPAC17H9.1…
SPBC14F5.08	GO Biological Process	GO:1901607	alpha-amino acid biosynthetic process	Enriched	7.42574257425743 (30/404)	2.10321324245375 (108/5135)	5.04284e-08	SPAC9E9.06C;SPBC11B10.02C;SPBC1271.04C;SPBC1677.03C;SPAC17G8.06C;SPBC23E6.10C;SPCC1442.09;SPBC106.17C;SPBC1711.13;SPBC839.16;SPCC1739.06C;SPBC36.04;SPAP7G5.04C;SPAC31G5.04;SPCC1223.08C;SPBC4C3.03;SPAC56F8.10;SPAC17H9.13C;SPAC25G10.05C;SPAC13G7.06;SPAC16C9.02C;SPAC7D4.07C;SPAC1F12.07;SPAC23H3.09C;SPBC3B8.03;SPAC227.18;SPBC21C3.08C;SPAC1782.11;SPBC2G2.08;SPBC3H7.07C
SPCC1919.13c	GO Biological Process	GO:0065007	biological regulation	Underrepresented	12.1287128712871 (49/404)	23.9532619279455 (1230/5135)	1.17263e-07	SPCC4B3.07;SPBP8B7.21;SPBC577.12;SPBC16A3.08C;SPAC16C9.06C;SPBC6B1.08C;SPAC23G3.04;SPBC428.18;SPBC1734.14C;SPCC16C4.08C;SPAC3G9.09C;SPAC17H9.02;SPBC342.06C;SPAC27E2.02;SPBC1773.07C;SPBC1215.02C;SPBC17D11.05;SPAC664.01C;SPAP7G5.04C;SPCC338.07C;SPCC18.11C;SPCC1682.04;SPAC31G5.13;SPAC3F10.12C;SPBC17D1.02;SPCC1840.08C;SPCC285.17;SPAC9E9.13;SPAC20H4.08;SPAC6F12.13C;SPAC7D4.07C;SPAC1071.12C;SPAC1F3.07C…
SPAC10F6.01c	GO Biological Process	GO:0006694	steroid biosynthetic process	Enriched	4.45544554455445 (18/404)	0.876338851022395 (45/5135)	2.40023e-07	SPAC343.01C;SPBC215.09C;SPAC24C9.03;SPBC713.12;SPAC20G4.07C;SPBC106.15;SPAC20G8.07C;SPCC16A11.10C;SPBC337.09;SPBC1773.04;SPAC6F12.13C;SPAC4F8.14C;SPAC13A11.02C;SPBC16E9.05;SPBC1709.07;SPAC1687.16C;SPBC29A10.01;SPBC36.06C
SPCC1235.16	GO Biological Process	GO:0006696	ergosterol biosynthetic process	Enriched	4.45544554455445 (18/404)	0.876338851022395 (45/5135)	2.40023e-07	SPAC343.01C;SPBC215.09C;SPAC24C9.03;SPBC713.12;SPAC20G4.07C;SPBC106.15;SPAC20G8.07C;SPCC16A11.10C;SPBC337.09;SPBC1773.04;SPAC6F12.13C;SPAC4F8.14C;SPAC13A11.02C;SPBC16E9.05;SPBC1709.07;SPAC1687.16C;SPBC29A10.01;SPBC36.06C
SPBC17D1.02	GO Biological Process	GO:0008204	ergosterol metabolic process	Enriched	4.45544554455445 (18/404)	0.876338851022395 (45/5135)	2.40023e-07	SPAC343.01C;SPBC215.09C;SPAC24C9.03;SPBC713.12;SPAC20G4.07C;SPBC106.15;SPAC20G8.07C;SPCC16A11.10C;SPBC337.09;SPBC1773.04;SPAC6F12.13C;SPAC4F8.14C;SPAC13A11.02C;SPBC16E9.05;SPBC1709.07;SPAC1687.16C;SPBC29A10.01;SPBC36.06C
SPAC823.08c	GO Biological Process	GO:0016126	sterol biosynthetic process	Enriched	4.45544554455445 (18/404)	0.876338851022395 (45/5135)	2.40023e-07	SPAC343.01C;SPBC215.09C;SPAC24C9.03;SPBC713.12;SPAC20G4.07C;SPBC106.15;SPAC20G8.07C;SPCC16A11.10C;SPBC337.09;SPBC1773.04;SPAC6F12.13C;SPAC4F8.14C;SPAC13A11.02C;SPBC16E9.05;SPBC1709.07;SPAC1687.16C;SPBC29A10.01;SPBC36.06C
SPAC140.02	GO Biological Process	GO:0016128	phytosteroid metabolic process	Enriched	4.45544554455445 (18/404)	0.876338851022395 (45/5135)	2.40023e-07	SPAC343.01C;SPBC215.09C;SPAC24C9.03;SPBC713.12;SPAC20G4.07C;SPBC106.15;SPAC20G8.07C;SPCC16A11.10C;SPBC337.09;SPBC1773.04;SPAC6F12.13C;SPAC4F8.14C;SPAC13A11.02C;SPBC16E9.05;SPBC1709.07;SPAC1687.16C;SPBC29A10.01;SPBC36.06C
SPCC1223.05c	GO Biological Process	GO:0016129	phytosteroid biosynthetic process	Enriched	4.45544554455445 (18/404)	0.876338851022395 (45/5135)	2.40023e-07	SPAC343.01C;SPBC215.09C;SPAC24C9.03;SPBC713.12;SPAC20G4.07C;SPBC106.15;SPAC20G8.07C;SPCC16A11.10C;SPBC337.09;SPBC1773.04;SPAC6F12.13C;SPAC4F8.14C;SPAC13A11.02C;SPBC16E9.05;SPBC1709.07;SPAC1687.16C;SPBC29A10.01;SPBC36.06C
SPBC1347.13c	GO Biological Process	GO:0044107	cellular alcohol metabolic process	Enriched	4.45544554455445 (18/404)	0.876338851022395 (45/5135)	2.40023e-07	SPAC343.01C;SPBC215.09C;SPAC24C9.03;SPBC713.12;SPAC20G4.07C;SPBC106.15;SPAC20G8.07C;SPCC16A11.10C;SPBC337.09;SPBC1773.04;SPAC6F12.13C;SPAC4F8.14C;SPAC13A11.02C;SPBC16E9.05;SPBC1709.07;SPAC1687.16C;SPBC29A10.01;SPBC36.06C
SPBC1677.03c	GO Biological Process	GO:0044108	cellular alcohol biosynthetic process	Enriched	4.45544554455445 (18/404)	0.876338851022395 (45/5135)	2.40023e-07	SPAC343.01C;SPBC215.09C;SPAC24C9.03;SPBC713.12;SPAC20G4.07C;SPBC106.15;SPAC20G8.07C;SPCC16A11.10C;SPBC337.09;SPBC1773.04;SPAC6F12.13C;SPAC4F8.14C;SPAC13A11.02C;SPBC16E9.05;SPBC1709.07;SPAC1687.16C;SPBC29A10.01;SPBC36.06C
SPAC14C4.11	GO Biological Process	GO:0097384	cellular lipid biosynthetic process	Enriched	4.45544554455445 (18/404)	0.876338851022395 (45/5135)	2.40023e-07	SPAC343.01C;SPBC215.09C;SPAC24C9.03;SPBC713.12;SPAC20G4.07C;SPBC106.15;SPAC20G8.07C;SPCC16A11.10C;SPBC337.09;SPBC1773.04;SPAC6F12.13C;SPAC4F8.14C;SPAC13A11.02C;SPBC16E9.05;SPBC1709.07;SPAC1687.16C;SPBC29A10.01;SPBC36.06C
SPBC336.10c	GO Biological Process	GO:0016125	sterol metabolic process	Enriched	4.45544554455445 (18/404)	0.895813047711782 (46/5135)	3.60952e-07	SPAC343.01C;SPBC215.09C;SPAC24C9.03;SPBC713.12;SPAC20G4.07C;SPBC106.15;SPAC20G8.07C;SPCC16A11.10C;SPBC337.09;SPBC1773.04;SPAC6F12.13C;SPAC4F8.14C;SPAC13A11.02C;SPBC16E9.05;SPBC1709.07;SPAC1687.16C;SPBC29A10.01;SPBC36.06C
SPAC926.05c	GO Biological Process	GO:0008202	steroid metabolic process	Enriched	4.45544554455445 (18/404)	0.934761441090555 (48/5135)	7.95807e-07	SPAC343.01C;SPBC215.09C;SPAC24C9.03;SPBC713.12;SPAC20G4.07C;SPBC106.15;SPAC20G8.07C;SPCC16A11.10C;SPBC337.09;SPBC1773.04;SPAC6F12.13C;SPAC4F8.14C;SPAC13A11.02C;SPBC16E9.05;SPBC1709.07;SPAC1687.16C;SPBC29A10.01;SPBC36.06C
SPBC646.07c	GO Biological Process	GO:0051716	cellular response to stimulus	Underrepresented	5.44554455445545 (22/404)	14.255111976631 (732/5135)	8.10537e-07	SPCC4B3.07;SPBC16A3.08C;SPAC16C9.06C;SPBC6B1.08C;SPAC20G4.07C;SPAC3G9.09C;SPAC30.03C;SPAC144.03;SPBC342.06C;SPAC27E2.02;SPBC1773.07C;SPBC17D11.05;SPAC20H4.08;SPAC7D4.07C;SPAC1071.12C;SPAC3F10.04;SPAC22E12.07;SPBC16A3.11;SPCC553.07C;SPAC16E8.11C;SPBC2D10.12;SPBC3B9.01
SPBC115.01c	GO Biological Process	GO:0000103	sulfate assimilation	Enriched	1.98019801980198 (8/404)	0.175267770204479 (9/5135)	1.17342e-06	SPCC1753.04;SPBC27.08C;SPCC1739.06C;SPAC10F6.01C;SPAC13G7.06;SPAC7D4.07C;SPCC584.01C;SPAC1782.11
SPAC5H10.12c	GO Biological Process	GO:0050896	response to stimulus	Underrepresented	5.94059405940594 (24/404)	14.4109055501461 (740/5135)	3.4325e-06	SPBC11B10.02C;SPCC4B3.07;SPBC16A3.08C;SPAC16C9.06C;SPBC6B1.08C;SPAC20G4.07C;SPAC3G9.09C;SPAC30.03C;SPAC144.03;SPBC342.06C;SPAC27E2.02;SPBC1773.07C;SPAC18G6.07C;SPBC17D11.05;SPAC20H4.08;SPAC7D4.07C;SPAC1071.12C;SPAC3F10.04;SPAC22E12.07;SPBC16A3.11;SPCC553.07C;SPAC16E8.11C;SPBC2D10.12;SPBC3B9.01
SPAC17G6.15c	GO Biological Process	GO:0007049	cell cycle	Underrepresented	4.95049504950495 (20/404)	12.9698149951315 (666/5135)	4.28512e-06	SPBC428.18;SPAC20G4.07C;SPBC1734.14C;SPAC3G9.09C;SPCC1682.08C;SPBC1215.02C;SPAC20G8.07C;SPAC664.01C;SPBC18E5.03C;SPCC1682.04;SPAC31G5.13;SPAC6F12.13C;SPAC4F8.14C;SPAC22E12.07;SPBC16A3.11;SPCC553.07C;SPBP8B7.12C;SPBC11C11.02;SPBC685.09;SPAC10F6.03C
SPBC405.01	GO Biological Process	GO:0000003	reproduction	Underrepresented	0.99009900990099 (4/404)	6.38753651411879 (328/5135)	5.14422e-06	SPAC20G4.07C;SPCC1682.08C;SPAC20G8.07C;SPAC664.01C
SPCC1393.06c	GO Biological Process	GO:0042274	ribosomal small subunit biogenesis	Enriched	4.45544554455445 (18/404)	1.07108081791626 (55/5135)	7.24422e-06	SPBC1703.05;SPAC959.03C;SPCC285.15C;SPAC3A12.13C;SPAC20H4.01;SPAC18G6.07C;SPAC10F6.10;SPBC685.06;SPBC1105.01;SPAC607.03C;SPBC409.15;SPBC23E6.04C;SPBC23G7.07C;SPAC3C7.08C;SPAC1B3.13;SPBC244.02C;SPBC18E5.06;SPAC8F11.04
SPCC5E4.07	GO Biological Process	GO:0051179	localization	Underrepresented	11.3861386138614 (46/404)	21.2658227848101 (1092/5135)	7.24422e-06	SPBC776.04;SPAC1B1.03C;SPCC285.15C;SPAC1039.01;SPBP8B7.21;SPBC27.01C;SPAC20G4.07C;SPAC17H9.02;SPBC19G7.17;SPBC1773.07C;SPAC6G10.07;SPBC530.15C;SPAC20G8.07C;SPAC14C4.11;SPAC664.01C;SPBC16H5.08C;SPCC1682.04;SPBC1711.05;SPCC1682.09C;SPBC15C4.04C;SPBC36.01C;SPAC4F8.03;SPCC1840.08C;SPAC15F9.02;SPAC19G12.05;SPCC569.05C;SPBC12C2.06;SPAC17G6.15C;SPAC3C7.08C;SPAC3F10.04;SPBC16D10.06;SPBC365.11;SPBC409.08;…
SPAC13A11.02c	GO Biological Process	GO:0050794	regulation of cellular process	Underrepresented	10.8910891089109 (44/404)	20.7010710808179 (1063/5135)	7.25957e-06	SPCC4B3.07;SPBP8B7.21;SPBC577.12;SPBC16A3.08C;SPBC6B1.08C;SPAC23G3.04;SPBC428.18;SPBC1734.14C;SPCC16C4.08C;SPAC3G9.09C;SPAC17H9.02;SPBC342.06C;SPAC27E2.02;SPBC1773.07C;SPBC1215.02C;SPBC17D11.05;SPAC664.01C;SPAP7G5.04C;SPCC338.07C;SPCC18.11C;SPCC1682.04;SPAC31G5.13;SPAC3F10.12C;SPBC17D1.02;SPCC285.17;SPAC9E9.13;SPAC20H4.08;SPAC6F12.13C;SPAC7D4.07C;SPAC1071.12C;SPAC1F3.07C;SPBC1778.01C;SPAC4F8.14C;…
SPAC3F10.04	GO Biological Process	GO:0022402	cell cycle process	Underrepresented	4.45544554455445 (18/404)	11.8597857838364 (609/5135)	1.10288e-05	SPBC428.18;SPAC20G4.07C;SPAC3G9.09C;SPBC1215.02C;SPAC20G8.07C;SPAC664.01C;SPBC18E5.03C;SPCC1682.04;SPAC31G5.13;SPAC6F12.13C;SPAC4F8.14C;SPAC22E12.07;SPBC16A3.11;SPCC553.07C;SPBP8B7.12C;SPBC11C11.02;SPBC685.09;SPAC10F6.03C
SPCC970.05	GO Biological Process	GO:0044711	single-organism biosynthetic process	Enriched	24.2574257425743 (98/404)	14.8393378773126 (762/5135)	1.40769e-05	SPAC16.03C;SPAC9E9.06C;SPAC343.01C;SPBP8B7.17C;SPBC11B10.02C;SPBC215.09C;SPAC56F8.04C;SPCC4B3.18;SPBC1271.04C;SPAC24C9.03;SPBC577.12;SPBC713.12;SPBC1677.03C;SPBC428.18;SPAC20G4.07C;SPAC222.08C;SPBC27.08C;SPAC22A12.13;SPBC646.07C;SPAC17H9.02;SPBC2G2.12;SPAC144.03;SPBC106.15;SPAC17G8.06C;SPBC23E6.10C;SPCC1442.09;SPBC106.17C;SPCC24B10.21;SPBC2F12.14C;SPBC1711.13;SPBC839.16;SPCC1739.06C;SPAC20G8.07C;…
SPAC22A12.05	GO Biological Process	GO:1901360	organic cyclic compound metabolic process	Enriched	42.8217821782178 (173/404)	31.080817916261 (1596/5135)	1.72961e-05	SPAPB18E9.01;SPCC18.12C;SPAC16.03C;SPBC1703.05;SPAC23C4.15;SPAC959.03C;SPBC30D10.15;SPAC343.01C;SPBP8B7.17C;SPBC11B10.02C;SPAC1B3.12C;SPCC4B3.07;SPBC215.09C;SPCC285.15C;SPAC1A6.10;SPCC4B3.18;SPAC24C9.03;SPBC713.12;SPAC16C9.06C;SPBC6B1.08C;SPAC23G3.04;SPBC428.18;SPAC20G4.07C;SPAC2F7.13C;SPAC56E4.03;SPBC115.01C;SPAC222.08C;SPAC29E6.06C;SPBC36.07;SPBC1604.06C;SPAC30.03C;SPAC1782.10C;SPAC17H9.02;SPAC…
SPCC24B10.21	GO Biological Process	GO:0007154	cell communication	Underrepresented	2.22772277227723 (9/404)	8.23758519961052 (423/5135)	1.78304e-05	SPCC4B3.07;SPBC16A3.08C;SPBC6B1.08C;SPAC27E2.02;SPBC1773.07C;SPBC17D11.05;SPAC20H4.08;SPAC1071.12C;SPAC22E12.07
SPBC36.02c	GO Biological Process	GO:0007165	signal transduction	Underrepresented	1.73267326732673 (7/404)	7.22492697176241 (371/5135)	2.73181e-05	SPCC4B3.07;SPBC16A3.08C;SPBC6B1.08C;SPBC1773.07C;SPAC20H4.08;SPAC1071.12C;SPAC22E12.07
SPCC962.04	GO Biological Process	GO:0023052	signaling	Underrepresented	1.73267326732673 (7/404)	7.28334956183057 (374/5135)	2.73181e-05	SPCC4B3.07;SPBC16A3.08C;SPBC6B1.08C;SPBC1773.07C;SPAC20H4.08;SPAC1071.12C;SPAC22E12.07
SPBC1773.04	GO Biological Process	GO:0044700	single organism signaling	Underrepresented	1.73267326732673 (7/404)	7.2444011684518 (372/5135)	2.73181e-05	SPCC4B3.07;SPBC16A3.08C;SPBC6B1.08C;SPBC1773.07C;SPAC20H4.08;SPAC1071.12C;SPAC22E12.07
SPBC3B9.07c	GO Biological Process	GO:0046165	alcohol biosynthetic process	Enriched	4.7029702970297 (19/404)	1.28529698149951 (66/5135)	2.73181e-05	SPAC343.01C;SPBC215.09C;SPAC24C9.03;SPBC713.12;SPAC20G4.07C;SPBC106.15;SPAC20G8.07C;SPAC22A12.10;SPCC16A11.10C;SPBC337.09;SPBC1773.04;SPAC6F12.13C;SPAC4F8.14C;SPAC13A11.02C;SPBC16E9.05;SPBC1709.07;SPAC1687.16C;SPBC29A10.01;SPBC36.06C
SPAP27G11.04c	GO Biological Process	GO:0046112	nucleobase biosynthetic process	Enriched	2.47524752475248 (10/404)	0.370009737098345 (19/5135)	2.78816e-05	SPAC16.03C;SPBC839.16;SPCC1795.05C;SPAC4D7.08C;SPBC405.01;SPCC1322.13;SPAC23A1.03;SPBC2G2.08;SPAC10F6.03C;SPBC1198.02
SPAC12B10.09	GO Biological Process	GO:0009067	aspartate family amino acid biosynthetic process	Enriched	3.46534653465347 (14/404)	0.740019474196689 (38/5135)	3.23653e-05	SPAC9E9.06C;SPBC23E6.10C;SPBC106.17C;SPCC1739.06C;SPAP7G5.04C;SPAC31G5.04;SPBC4C3.03;SPAC56F8.10;SPAC13G7.06;SPAC16C9.02C;SPAC7D4.07C;SPBC3B8.03;SPAC227.18;SPAC1782.11
SPBC3B8.03	GO Biological Process	GO:0050789	regulation of biological process	Underrepresented	11.8811881188119 (48/404)	21.2852969814995 (1093/5135)	3.28681e-05	SPCC4B3.07;SPBP8B7.21;SPBC577.12;SPBC16A3.08C;SPAC16C9.06C;SPBC6B1.08C;SPAC23G3.04;SPBC428.18;SPBC1734.14C;SPCC16C4.08C;SPAC3G9.09C;SPAC17H9.02;SPBC342.06C;SPAC27E2.02;SPBC1773.07C;SPBC1215.02C;SPBC17D11.05;SPAC664.01C;SPAP7G5.04C;SPCC338.07C;SPCC18.11C;SPCC1682.04;SPAC31G5.13;SPAC3F10.12C;SPBC17D1.02;SPCC1840.08C;SPCC285.17;SPAC9E9.13;SPAC20H4.08;SPAC6F12.13C;SPAC7D4.07C;SPAC1071.12C;SPAC1F3.07C…
SPCC330.14c	GO Biological Process	GO:1901617	organic hydroxy compound biosynthetic process	Enriched	4.95049504950495 (20/404)	1.44109055501461 (74/5135)	3.8511e-05	SPAC343.01C;SPBC215.09C;SPAC24C9.03;SPBC713.12;SPAC20G4.07C;SPAC222.08C;SPBC106.15;SPAC20G8.07C;SPAC22A12.10;SPCC16A11.10C;SPBC337.09;SPBC1773.04;SPAC6F12.13C;SPAC4F8.14C;SPAC13A11.02C;SPBC16E9.05;SPBC1709.07;SPAC1687.16C;SPBC29A10.01;SPBC36.06C
SPBC83.15	GO Biological Process	GO:1901605	alpha-amino acid metabolic process	Enriched	7.42574257425743 (30/404)	2.84323271665044 (146/5135)	4.45647e-05	SPAC9E9.06C;SPBC11B10.02C;SPBC1271.04C;SPBC1677.03C;SPAC17G8.06C;SPBC23E6.10C;SPCC1442.09;SPBC106.17C;SPBC1711.13;SPBC839.16;SPCC1739.06C;SPBC36.04;SPAP7G5.04C;SPAC31G5.04;SPCC1223.08C;SPBC4C3.03;SPAC56F8.10;SPAC17H9.13C;SPAC25G10.05C;SPAC13G7.06;SPAC16C9.02C;SPAC7D4.07C;SPAC1F12.07;SPAC23H3.09C;SPBC3B8.03;SPAC227.18;SPBC21C3.08C;SPAC1782.11;SPBC2G2.08;SPBC3H7.07C
SPCC320.11c	GO Biological Process	GO:0006807	nitrogen compound metabolic process	Enriched	44.8019801980198 (181/404)	33.5345666991237 (1722/5135)	6.23491e-05	SPAPB18E9.01;SPCC18.12C;SPAC16.03C;SPBC1703.05;SPAC23C4.15;SPAC959.03C;SPAC9E9.06C;SPBC30D10.15;SPBP8B7.17C;SPBC11B10.02C;SPAC1B3.12C;SPCC4B3.07;SPCC285.15C;SPAC1A6.10;SPBC1271.04C;SPCC4B3.18;SPAC16C9.06C;SPBC1677.03C;SPBC6B1.08C;SPAC23G3.04;SPBC428.18;SPAC2F7.13C;SPAC56E4.03;SPBC115.01C;SPAC222.08C;SPAC29E6.06C;SPBC36.07;SPBC27.08C;SPBC1604.06C;SPAC30.03C;SPAC1782.10C;SPAC17H9.02;SPAC16E8.15;SPB…
SPBC16G5.10	GO Biological Process	GO:0008104	protein localization	Underrepresented	4.20792079207921 (17/404)	10.7108081791626 (550/5135)	9.01468e-05	SPBC776.04;SPAC1B1.03C;SPBC27.01C;SPAC20G4.07C;SPBC19G7.17;SPBC1773.07C;SPAC20G8.07C;SPAC664.01C;SPCC1682.04;SPBC1711.05;SPCC1840.08C;SPBC365.11;SPBC3B9.05;SPBC3H7.09;SPAC22E12.07;SPBC16E9.05;SPAC1687.16C
SPBC8D2.10c	GO Biological Process	GO:0009112	nucleobase metabolic process	Enriched	2.97029702970297 (12/404)	0.603700097370984 (31/5135)	0.000103834	SPAC16.03C;SPBC839.16;SPCC1795.05C;SPAC4D7.08C;SPBC405.01;SPCC1322.13;SPAC57A10.12C;SPAC23A1.03;SPCC965.14C;SPBC2G2.08;SPAC10F6.03C;SPBC1198.02
SPBC1778.01c	GO Biological Process	GO:0006790	sulfur compound metabolic process	Enriched	5.44554455445545 (22/404)	1.81110029211295 (93/5135)	0.000112847	SPAC343.01C;SPBP8B7.17C;SPCC1753.04;SPCC4B3.18;SPAC24C9.03;SPBC27.08C;SPBC23E6.10C;SPBC106.17C;SPCC1739.06C;SPBC36.04;SPAC10F6.01C;SPBC4C3.03;SPAC56F8.10;SPAC13G7.06;SPAC16C9.02C;SPAC7D4.07C;SPAC22A12.16;SPAC3F10.04;SPAC4F8.14C;SPCC584.01C;SPCC737.06C;SPAC1782.11
SPBP16F5.06	GO Biological Process	GO:0034613	cellular protein localization	Underrepresented	4.20792079207921 (17/404)	10.5550146056475 (542/5135)	0.000162556	SPBC776.04;SPAC1B1.03C;SPBC27.01C;SPAC20G4.07C;SPBC19G7.17;SPBC1773.07C;SPAC20G8.07C;SPAC664.01C;SPCC1682.04;SPBC1711.05;SPCC1840.08C;SPBC365.11;SPBC3B9.05;SPBC3H7.09;SPAC22E12.07;SPBC16E9.05;SPAC1687.16C
SPBC16A3.08c	GO Biological Process	GO:0070813	hydrogen sulfide metabolic process	Enriched	1.23762376237624 (5/404)	0.0973709834469328 (5/5135)	0.000171531	SPBC27.08C;SPAC10F6.01C;SPAC13G7.06;SPCC584.01C;SPAC1782.11
SPCC1682.08c	GO Biological Process	GO:0070814	hydrogen sulfide biosynthetic process	Enriched	1.23762376237624 (5/404)	0.0973709834469328 (5/5135)	0.000171531	SPBC27.08C;SPAC10F6.01C;SPAC13G7.06;SPCC584.01C;SPAC1782.11
SPAC16E8.11c	GO Biological Process	GO:0044699	single-organism process	Underrepresented	44.5544554455446 (180/404)	55.7351509250243 (2862/5135)	0.000182173	SPAC1786.02;SPAC16.03C;SPAC9E9.06C;SPBC776.04;SPAC343.01C;SPBP8B7.17C;SPBC11B10.02C;SPCC4B3.07;SPCC1753.04;SPAC1B1.03C;SPBC215.09C;SPCC285.15C;SPAC1039.01;SPAC56F8.04C;SPBC1271.04C;SPCC4B3.18;SPBP8B7.21;SPAC24C9.03;SPBC577.12;SPBC16A3.08C;SPBC713.12;SPBC1677.03C;SPBC6B1.08C;SPBC428.18;SPAC20G4.07C;SPAC2F7.13C;SPBC1734.14C;SPCC16C4.08C;SPAC3G9.09C;SPAC56E4.03;SPAC222.08C;SPAC29E6.06C;SPBC27.08C;SP…
SPAC8C9.15c	GO Biological Process	GO:0044272	sulfur compound biosynthetic process	Enriched	4.20792079207921 (17/404)	1.20740019474197 (62/5135)	0.000188311	SPBP8B7.17C;SPCC4B3.18;SPBC27.08C;SPBC23E6.10C;SPBC106.17C;SPCC1739.06C;SPBC36.04;SPAC10F6.01C;SPAC56F8.10;SPAC13G7.06;SPAC16C9.02C;SPAC7D4.07C;SPAC22A12.16;SPAC3F10.04;SPCC584.01C;SPCC737.06C;SPAC1782.11
SPCC16C4.08c	GO Biological Process	GO:0009066	aspartate family amino acid metabolic process	Enriched	3.71287128712871 (15/404)	0.973709834469328 (50/5135)	0.000208752	SPAC9E9.06C;SPBC23E6.10C;SPBC106.17C;SPCC1739.06C;SPAP7G5.04C;SPAC31G5.04;SPBC4C3.03;SPAC56F8.10;SPAC13G7.06;SPAC16C9.02C;SPAC7D4.07C;SPAC23H3.09C;SPBC3B8.03;SPAC227.18;SPAC1782.11
SPAC110.04c	GO Biological Process	GO:0009165	nucleotide biosynthetic process	Enriched	5.69306930693069 (23/404)	2.0253164556962 (104/5135)	0.000211242	SPAC16.03C;SPCC4B3.18;SPAC144.03;SPBC2F12.14C;SPBC839.16;SPAC6F12.10C;SPCC1795.05C;SPCC1223.08C;SPAC3F10.03;SPAP7G5.02C;SPAC4D7.08C;SPBC405.01;SPCC1322.13;SPAC4G9.03;SPAC57A10.12C;SPBC14F5.09C;SPAC1F7.05;SPAC23A1.03;SPAC323.01C;SPCC965.14C;SPBC2G2.08;SPAC10F6.03C;SPBC3D6.06C
SPCC4B3.18	GO Biological Process	GO:1901293	nucleoside phosphate biosynthetic process	Enriched	5.69306930693069 (23/404)	2.0253164556962 (104/5135)	0.000211242	SPAC16.03C;SPCC4B3.18;SPAC144.03;SPBC2F12.14C;SPBC839.16;SPAC6F12.10C;SPCC1795.05C;SPCC1223.08C;SPAC3F10.03;SPAP7G5.02C;SPAC4D7.08C;SPBC405.01;SPCC1322.13;SPAC4G9.03;SPAC57A10.12C;SPBC14F5.09C;SPAC1F7.05;SPAC23A1.03;SPAC323.01C;SPCC965.14C;SPBC2G2.08;SPAC10F6.03C;SPBC3D6.06C
SPBC106.15	GO Biological Process	GO:0030490	maturation of SSU-rRNA	Enriched	3.21782178217822 (13/404)	0.759493670886076 (39/5135)	0.000246824	SPBC1703.05;SPAC959.03C;SPCC285.15C;SPAC3A12.13C;SPAC20H4.01;SPAC10F6.10;SPBC1105.01;SPAC607.03C;SPBC409.15;SPBC23E6.04C;SPAC1B3.13;SPBC244.02C;SPAC8F11.04
SPCC162.01c	GO Biological Process	GO:0000096	sulfur amino acid metabolic process	Enriched	2.97029702970297 (12/404)	0.662122687439143 (34/5135)	0.000291676	SPBC27.08C;SPBC23E6.10C;SPBC106.17C;SPCC1739.06C;SPBC36.04;SPAC10F6.01C;SPBC4C3.03;SPAC56F8.10;SPAC13G7.06;SPAC16C9.02C;SPAC7D4.07C;SPAC1782.11
SPAC1F12.10c	GO Biological Process	GO:1903047	mitotic cell cycle process	Underrepresented	3.21782178217822 (13/404)	8.80233690360273 (452/5135)	0.000321321	SPBC428.18;SPAC3G9.09C;SPBC1215.02C;SPAC664.01C;SPBC18E5.03C;SPCC1682.04;SPAC31G5.13;SPAC22E12.07;SPBC16A3.11;SPCC553.07C;SPBP8B7.12C;SPBC11C11.02;SPBC685.09
SPAC14C4.12c	GO Biological Process	GO:0051321	meiotic cell cycle	Underrepresented	0.742574257425743 (3/404)	4.634858812074 (238/5135)	0.000335354	SPAC20G4.07C;SPCC1682.08C;SPAC20G8.07C
SPAC24C9.03	GO Biological Process	GO:0070727	cellular macromolecule localization	Underrepresented	4.45544554455445 (18/404)	10.6134371957157 (545/5135)	0.000355367	SPBC776.04;SPAC1B1.03C;SPBC27.01C;SPAC20G4.07C;SPAC17H9.02;SPBC19G7.17;SPBC1773.07C;SPAC20G8.07C;SPAC664.01C;SPCC1682.04;SPBC1711.05;SPCC1840.08C;SPBC365.11;SPBC3B9.05;SPBC3H7.09;SPAC22E12.07;SPBC16E9.05;SPAC1687.16C
SPBC1861.02	GO Biological Process	GO:0065008	regulation of biological quality	Underrepresented	1.73267326732673 (7/404)	6.40701071080818 (329/5135)	0.000355407	SPAC16C9.06C;SPAC17H9.02;SPCC1840.08C;SPAC9E9.13;SPAC7D4.07C;SPAC17G6.15C;SPBC1778.01C
SPAC1F7.05	GO Biological Process	GO:0051641	cellular localization	Underrepresented	8.16831683168317 (33/404)	15.4819863680623 (795/5135)	0.000405862	SPBC776.04;SPAC1B1.03C;SPCC285.15C;SPBP8B7.21;SPBC27.01C;SPAC20G4.07C;SPAC17H9.02;SPBC19G7.17;SPBC1773.07C;SPAC20G8.07C;SPAC14C4.11;SPAC664.01C;SPBC16H5.08C;SPCC1682.04;SPBC1711.05;SPAC4F8.03;SPCC1840.08C;SPAC15F9.02;SPAC19G12.05;SPBC12C2.06;SPAC17G6.15C;SPAC3C7.08C;SPBC365.11;SPBC3B9.05;SPBC3H7.09;SPBC29A3.11C;SPAC22E12.07;SPAC12B10.09;SPAC1142.04;SPBP8B7.11;SPBC16E9.05;SPAC1687.16C;SPBC4C3.05C
SPSNORNA.42	GO Biological Process	GO:0000280	nuclear division	Underrepresented	2.22772277227723 (9/404)	7.2444011684518 (372/5135)	0.000411868	SPAC20G4.07C;SPAC20G8.07C;SPAC664.01C;SPBC18E5.03C;SPCC1682.04;SPAC31G5.13;SPAC22E12.07;SPBC16A3.11;SPBP8B7.12C
SPAC343.01c	GO Biological Process	GO:0035556	intracellular signal transduction	Underrepresented	0.742574257425743 (3/404)	4.61538461538462 (237/5135)	0.000489152	SPBC16A3.08C;SPBC1773.07C;SPAC22E12.07
SPAPB1A10.05	GO Biological Process	GO:0009113	purine nucleobase biosynthetic process	Enriched	1.73267326732673 (7/404)	0.233690360272639 (12/5135)	0.000501264	SPBC839.16;SPAC4D7.08C;SPBC405.01;SPCC1322.13;SPAC23A1.03;SPBC2G2.08;SPBC1198.02
SPAC27F1.06c	GO Biological Process	GO:0007005	mitochondrion organization	Underrepresented	1.23762376237624 (5/404)	5.47224926971762 (281/5135)	0.000524112	SPBC2G2.12;SPAC3F10.03;SPCC4G3.14;SPBC3B9.05;SPAC2F3.04C
SPAC3H5.05c	GO Biological Process	GO:0051128	regulation of cellular component organization	Underrepresented	1.73267326732673 (7/404)	6.21226874391431 (319/5135)	0.000664436	SPCC16C4.08C;SPAC17H9.02;SPBC1215.02C;SPCC1682.04;SPAC31G5.13;SPAC9E9.13;SPBC16A3.11
SPBC29B5.03c	GO Biological Process	GO:0000278	mitotic cell cycle	Underrepresented	3.46534653465347 (14/404)	8.91918208373905 (458/5135)	0.000740928	SPBC428.18;SPBC1734.14C;SPAC3G9.09C;SPBC1215.02C;SPAC664.01C;SPBC18E5.03C;SPCC1682.04;SPAC31G5.13;SPAC22E12.07;SPBC16A3.11;SPCC553.07C;SPBP8B7.12C;SPBC11C11.02;SPBC685.09
SPBC2G2.11	GO Biological Process	GO:0000296	spermine transport	Enriched	1.48514851485149 (6/404)	0.175267770204479 (9/5135)	0.000740928	SPBC530.15C;SPBC36.01C;SPCC569.05C;SPBC409.08;SPBC36.02C;SPBC609.04
SPCTRNASER.11	GO Biological Process	GO:0006066	alcohol metabolic process	Enriched	4.7029702970297 (19/404)	1.61635832521908 (83/5135)	0.000740928	SPAC343.01C;SPBC215.09C;SPAC24C9.03;SPBC713.12;SPAC20G4.07C;SPBC106.15;SPAC20G8.07C;SPAC22A12.10;SPCC16A11.10C;SPBC337.09;SPBC1773.04;SPAC6F12.13C;SPAC4F8.14C;SPAC13A11.02C;SPBC16E9.05;SPBC1709.07;SPAC1687.16C;SPBC29A10.01;SPBC36.06C
SPAC4A8.06c	GO Biological Process	GO:0015846	polyamine transport	Enriched	1.48514851485149 (6/404)	0.175267770204479 (9/5135)	0.000740928	SPBC530.15C;SPBC36.01C;SPCC569.05C;SPBC409.08;SPBC36.02C;SPBC609.04
SPAC4C5.01	GO Biological Process	GO:0048285	organelle fission	Underrepresented	2.47524752475248 (10/404)	7.34177215189873 (377/5135)	0.000740928	SPAC20G4.07C;SPAC20G8.07C;SPAC664.01C;SPBC18E5.03C;SPCC1682.04;SPAC31G5.13;SPBC582.09;SPAC22E12.07;SPBC16A3.11;SPBP8B7.12C
SPAC664.04c	GO Biological Process	GO:1902047	polyamine transmembrane transport	Enriched	1.48514851485149 (6/404)	0.175267770204479 (9/5135)	0.000740928	SPBC530.15C;SPBC36.01C;SPCC569.05C;SPBC409.08;SPBC36.02C;SPBC609.04
SPAC9.02c	GO Biological Process	GO:1903710	spermine transmembrane transport	Enriched	1.48514851485149 (6/404)	0.175267770204479 (9/5135)	0.000740928	SPBC530.15C;SPBC36.01C;SPCC569.05C;SPBC409.08;SPBC36.02C;SPBC609.04
SPBC2D10.10c	GO Biological Process	GO:0090407	organophosphate biosynthetic process	Enriched	8.16831683168317 (33/404)	3.77799415774099 (194/5135)	0.000759998	SPAC16.03C;SPAC343.01C;SPBP8B7.17C;SPCC4B3.18;SPAC24C9.03;SPAC222.08C;SPAC22A12.13;SPAC144.03;SPBC106.15;SPBC2F12.14C;SPBC839.16;SPAC22A12.10;SPAC6F12.10C;SPCC1795.05C;SPCC1223.08C;SPAC3F10.03;SPAP7G5.02C;SPAC4D7.08C;SPBC405.01;SPCC1322.13;SPAC6F12.13C;SPAC4G9.03;SPAC57A10.12C;SPBC14F5.09C;SPAC4F8.14C;SPAC1F7.05;SPAC23A1.03;SPAC323.01C;SPCC965.14C;SPBC2G2.08;SPAC10F6.03C;SPBC3D6.06C;SPBC36.06C
SPBC1711.16	GO Biological Process	GO:0006396	RNA processing	Enriched	15.3465346534653 (62/404)	9.01655306718598 (463/5135)	0.000797086	SPAPB18E9.01;SPCC18.12C;SPBC1703.05;SPAC959.03C;SPBC30D10.15;SPCC285.15C;SPAC1A6.10;SPBC115.01C;SPBC36.07;SPBC1604.06C;SPAC1782.10C;SPAC17H9.02;SPBC11G11.03;SPBC1861.08C;SPBC646.10C;SPAC3A12.13C;SPAC6G10.07;SPAC20H4.01;SPAC18G6.07C;SPAC23G3.06;SPCC162.01C;SPCC126.03;SPAC10F6.10;SPAC140.02;SPBC1105.01;SPAC607.03C;SPBC19C7.07C;SPCC1393.06C;SPAC823.08C;SPAC31G5.01;SPBC409.15;SPBC23E6.04C;SPAC890.04C…
SPAC3F10.03	GO Biological Process	GO:0009156	ribonucleoside monophosphate biosynthetic process	Enriched	3.46534653465347 (14/404)	0.973709834469328 (50/5135)	0.000858411	SPAC16.03C;SPAC144.03;SPBC2F12.14C;SPAC6F12.10C;SPAP7G5.02C;SPAC4D7.08C;SPBC405.01;SPCC1322.13;SPAC4G9.03;SPAC57A10.12C;SPBC14F5.09C;SPAC23A1.03;SPCC965.14C;SPBC3D6.06C
SPBC16A3.11	GO Biological Process	GO:0033036	macromolecule localization	Underrepresented	5.69306930693069 (23/404)	11.8597857838364 (609/5135)	0.00087106	SPBC776.04;SPAC1B1.03C;SPBC27.01C;SPAC20G4.07C;SPAC17H9.02;SPBC19G7.17;SPBC1773.07C;SPAC6G10.07;SPAC20G8.07C;SPAC664.01C;SPCC1682.04;SPBC1711.05;SPCC1840.08C;SPAC15F9.02;SPBC12C2.06;SPAC3C7.08C;SPBC365.11;SPBC3B9.05;SPBC3H7.09;SPAC22E12.07;SPBC16E9.05;SPAC1687.16C;SPBC4C3.05C
SPAC1687.16c	GO Biological Process	GO:1902578	single-organism localization	Underrepresented	9.40594059405941 (38/404)	16.5530671859786 (850/5135)	0.00114233	SPBC776.04;SPAC1B1.03C;SPCC285.15C;SPAC1039.01;SPBP8B7.21;SPAC20G4.07C;SPBC19G7.17;SPBC1773.07C;SPBC530.15C;SPAC20G8.07C;SPAC14C4.11;SPBC16H5.08C;SPBC1711.05;SPCC1682.09C;SPBC15C4.04C;SPBC36.01C;SPAC4F8.03;SPCC1840.08C;SPAC15F9.02;SPAC19G12.05;SPCC569.05C;SPAC17G6.15C;SPAC3C7.08C;SPAC3F10.04;SPBC16D10.06;SPBC409.08;SPBC3B9.05;SPBC3H7.09;SPBC29A3.11C;SPAC22E12.07;SPAC12B10.09;SPBC1271.09;SPAC1142.…
SPCC18.11c	GO Biological Process	GO:0042440	pigment metabolic process	Enriched	2.47524752475248 (10/404)	0.545277507302824 (28/5135)	0.00127901	SPBC839.16;SPCC1739.06C;SPAC1F12.10C;SPAC4D7.08C;SPBC405.01;SPCC1322.13;SPAC23A1.03;SPBC2G2.08;SPBC1198.02;SPBC36.06C
SPAC16C9.02c	GO Biological Process	GO:0046390	ribose phosphate biosynthetic process	Enriched	3.96039603960396 (16/404)	1.28529698149951 (66/5135)	0.00150472	SPAC16.03C;SPCC4B3.18;SPAC144.03;SPBC2F12.14C;SPAC6F12.10C;SPAP7G5.02C;SPAC4D7.08C;SPBC405.01;SPCC1322.13;SPAC4G9.03;SPAC57A10.12C;SPBC14F5.09C;SPAC23A1.03;SPCC965.14C;SPAC10F6.03C;SPBC3D6.06C
SPBC14F5.04c	GO Biological Process	GO:0051234	establishment of localization	Underrepresented	10.6435643564356 (43/404)	17.9552093476144 (922/5135)	0.00150472	SPBC776.04;SPAC1B1.03C;SPCC285.15C;SPAC1039.01;SPBP8B7.21;SPBC27.01C;SPAC20G4.07C;SPBC19G7.17;SPBC1773.07C;SPAC6G10.07;SPBC530.15C;SPAC20G8.07C;SPAC14C4.11;SPBC16H5.08C;SPBC1711.05;SPCC1682.09C;SPBC15C4.04C;SPBC36.01C;SPAC4F8.03;SPCC1840.08C;SPAC15F9.02;SPAC19G12.05;SPCC569.05C;SPBC12C2.06;SPAC17G6.15C;SPAC3C7.08C;SPAC3F10.04;SPBC16D10.06;SPBC365.11;SPBC409.08;SPBC3B9.05;SPBC3H7.09;SPBC29A3.11C;S…
SPBC23E6.10c	GO Biological Process	GO:0006399	tRNA metabolic process	Enriched	6.93069306930693 (28/404)	3.09639727361246 (159/5135)	0.00155881	SPAPB18E9.01;SPAC1A6.10;SPAC2F7.13C;SPBC115.01C;SPAC29E6.06C;SPBC36.07;SPAC17H9.02;SPAC17A5.15C;SPBC2G2.12;SPBC342.02;SPCC126.03;SPBC1773.10C;SPBC19C7.07C;SPAC3F10.03;SPBC1709.02C;SPBC25H2.02;SPAC3G9.06;SPAC17D4.04;SPAC2F7.14C;SPAC22A12.05;SPAC18B11.02C;SPAC6C3.09;SPBC800.08;SPAP27G11.04C;SPBC17A3.04C;SPAC31A2.02;SPBC16G5.10;SPBC2D10.10C
SPBP8B7.11	GO Biological Process	GO:0009070	serine family amino acid biosynthetic process	Enriched	1.73267326732673 (7/404)	0.272638753651412 (14/5135)	0.00158496	SPBC106.17C;SPBC36.04;SPCC1223.08C;SPAC13G7.06;SPAC1F12.07;SPAC23H3.09C;SPBC3H7.07C
SPAPJ760.03c	GO Biological Process	GO:0009124	nucleoside monophosphate biosynthetic process	Enriched	3.46534653465347 (14/404)	1.03213242453749 (53/5135)	0.00163041	SPAC16.03C;SPAC144.03;SPBC2F12.14C;SPAC6F12.10C;SPAP7G5.02C;SPAC4D7.08C;SPBC405.01;SPCC1322.13;SPAC4G9.03;SPAC57A10.12C;SPBC14F5.09C;SPAC23A1.03;SPCC965.14C;SPBC3D6.06C
SPCC338.07c	GO Biological Process	GO:0072522	purine-containing compound biosynthetic process	Enriched	3.71287128712871 (15/404)	1.16845180136319 (60/5135)	0.00173633	SPCC4B3.18;SPAC144.03;SPBC2F12.14C;SPBC839.16;SPAC6F12.10C;SPAP7G5.02C;SPAC4D7.08C;SPAC16C9.02C;SPBC405.01;SPCC1322.13;SPAC4G9.03;SPBC14F5.09C;SPAC23A1.03;SPBC2G2.08;SPBC1198.02
SPAC20H4.08	GO Biological Process	GO:1901362	organic cyclic compound biosynthetic process	Enriched	21.5346534653465 (87/404)	14.2940603700097 (734/5135)	0.00173633	SPAC16.03C;SPAC23C4.15;SPAC343.01C;SPBP8B7.17C;SPBC11B10.02C;SPAC1B3.12C;SPCC4B3.07;SPBC215.09C;SPCC4B3.18;SPAC24C9.03;SPBC713.12;SPBC6B1.08C;SPAC23G3.04;SPAC20G4.07C;SPAC222.08C;SPBC3B9.07C;SPAC144.03;SPBC106.15;SPBC342.06C;SPBC1718.03;SPCC1442.09;SPBC2F12.14C;SPBC1711.13;SPAC20G4.01;SPBC839.16;SPCC1739.06C;SPAC20G8.07C;SPAC6F12.10C;SPBC23E6.06C;SPAC664.01C;SPCC1795.05C;SPCC1223.08C;SPCC18.11C;S…
SPAC3A12.10	GO Biological Process	GO:0048522	positive regulation of cellular process	Underrepresented	2.22772277227723 (9/404)	6.56280428432327 (337/5135)	0.00236481	SPCC4B3.07;SPBC6B1.08C;SPBC1734.14C;SPCC338.07C;SPAC31G5.13;SPCC285.17;SPAC9E9.13;SPAC7D4.07C;SPBC16A3.11
SPBC1289.07c	GO Biological Process	GO:0006418	tRNA aminoacylation for protein translation	Enriched	2.72277227722772 (11/404)	0.701071080817916 (36/5135)	0.0024774	SPAC2F7.13C;SPAC29E6.06C;SPAC17A5.15C;SPBC2G2.12;SPBC342.02;SPBC1773.10C;SPAC3F10.03;SPBC1709.02C;SPBC25H2.02;SPAC3G9.06;SPBC17A3.04C
SPBC1711.13	GO Biological Process	GO:1901615	organic hydroxy compound metabolic process	Enriched	4.95049504950495 (20/404)	1.92794547224927 (99/5135)	0.00260944	SPAC343.01C;SPBC215.09C;SPAC24C9.03;SPBC713.12;SPAC20G4.07C;SPAC222.08C;SPBC106.15;SPAC20G8.07C;SPAC22A12.10;SPCC16A11.10C;SPBC337.09;SPBC1773.04;SPAC6F12.13C;SPAC4F8.14C;SPAC13A11.02C;SPBC16E9.05;SPBC1709.07;SPAC1687.16C;SPBC29A10.01;SPBC36.06C
SPBC1105.01	GO Biological Process	GO:0009260	ribonucleotide biosynthetic process	Enriched	3.71287128712871 (15/404)	1.22687439143135 (63/5135)	0.003016	SPAC16.03C;SPCC4B3.18;SPAC144.03;SPBC2F12.14C;SPAC6F12.10C;SPAP7G5.02C;SPAC4D7.08C;SPBC405.01;SPCC1322.13;SPAC4G9.03;SPAC57A10.12C;SPBC14F5.09C;SPAC23A1.03;SPCC965.14C;SPAC10F6.03C
SPBC15C4.04c	GO Biological Process	GO:0000097	sulfur amino acid biosynthetic process	Enriched	2.22772277227723 (9/404)	0.506329113924051 (26/5135)	0.00381426	SPBC23E6.10C;SPBC106.17C;SPCC1739.06C;SPBC36.04;SPAC56F8.10;SPAC13G7.06;SPAC16C9.02C;SPAC7D4.07C;SPAC1782.11
SPAC31G5.04	GO Biological Process	GO:0046148	pigment biosynthetic process	Enriched	2.22772277227723 (9/404)	0.506329113924051 (26/5135)	0.00381426	SPBC839.16;SPCC1739.06C;SPAC4D7.08C;SPBC405.01;SPCC1322.13;SPAC23A1.03;SPBC2G2.08;SPBC1198.02;SPBC36.06C
SPCC1753.04	GO Biological Process	GO:0006360	transcription from RNA polymerase I promoter	Enriched	2.47524752475248 (10/404)	0.62317429406037 (32/5135)	0.00413291	SPAC23C4.15;SPAC1B3.12C;SPBC3B9.07C;SPBC1718.03;SPBP23A10.07;SPBC1289.07C;SPCC285.17;SPCC1259.03;SPAC2F3.03C;SPBC4C3.05C
SPAC1782.11	GO Biological Process	GO:0006720	isoprenoid metabolic process	Enriched	1.73267326732673 (7/404)	0.311587147030185 (16/5135)	0.00413291	SPAC343.01C;SPAC56F8.04C;SPAC24C9.03;SPBC106.15;SPAC6F12.13C;SPAC4F8.14C;SPBC36.06C
SPBC577.12	GO Biological Process	GO:0008299	isoprenoid biosynthetic process	Enriched	1.73267326732673 (7/404)	0.311587147030185 (16/5135)	0.00413291	SPAC343.01C;SPAC56F8.04C;SPAC24C9.03;SPBC106.15;SPAC6F12.13C;SPAC4F8.14C;SPBC36.06C
SPAC29A4.02c	GO Biological Process	GO:0044085	cellular component biogenesis	Enriched	22.7722772277228 (92/404)	15.6767283349562 (805/5135)	0.00413291	SPCC18.12C;SPAC3H5.05C;SPBC1703.05;SPAC959.03C;SPBC30D10.15;SPCC285.15C;SPBC23E6.05;SPBC428.18;SPCC16C4.08C;SPBC115.01C;SPAC31G5.03;SPBC1604.06C;SPAC1782.10C;SPAC17H9.02;SPBC11G11.03;SPCC320.11C;SPAC227.05;SPBC646.10C;SPAC3A12.13C;SPAC20H4.01;SPAC18G6.07C;SPAC23G3.06;SPBC1215.02C;SPBC17D11.05;SPBC14F5.06;SPBC29A10.06C;SPAC8C9.10C;SPBC2D10.11C;SPAC10F6.10;SPAC140.02;SPBC685.06;SPAC8E11.07C;SPBC110…
SPBC11G11.03	GO Biological Process	GO:0016192	vesicle-mediated transport	Underrepresented	2.22772277227723 (9/404)	6.40701071080818 (329/5135)	0.00428513	SPBC776.04;SPBP8B7.21;SPBC27.01C;SPAC20G4.07C;SPAC20G8.07C;SPBC365.11;SPBP8B7.11;SPBC16E9.05;SPAC1687.16C
SPAC607.04	GO Biological Process	GO:0044763	single-organism cellular process	Underrepresented	41.8316831683168 (169/404)	51.080817916261 (2623/5135)	0.00450256	SPAC1786.02;SPAC16.03C;SPAC9E9.06C;SPAC343.01C;SPBP8B7.17C;SPBC11B10.02C;SPCC4B3.07;SPCC1753.04;SPBC215.09C;SPAC1039.01;SPAC56F8.04C;SPBC1271.04C;SPCC4B3.18;SPAC24C9.03;SPBC577.12;SPBC16A3.08C;SPBC713.12;SPBC1677.03C;SPBC6B1.08C;SPBC428.18;SPAC20G4.07C;SPAC2F7.13C;SPBC1734.14C;SPCC16C4.08C;SPAC3G9.09C;SPAC56E4.03;SPAC222.08C;SPAC29E6.06C;SPBC27.08C;SPAC30.03C;SPAC22A12.13;SPBC646.07C;SPCC5E4.05C;…
SPCC74.05	GO Biological Process	GO:0006189	'de novo' IMP biosynthetic process	Enriched	1.23762376237624 (5/404)	0.155793573515093 (8/5135)	0.00502234	SPAC6F12.10C;SPAC4D7.08C;SPBC405.01;SPCC1322.13;SPBC14F5.09C
SPAC1F12.07	GO Biological Process	GO:0007126	meiotic nuclear division	Underrepresented	0.495049504950495 (2/404)	3.38851022395326 (174/5135)	0.00509043	SPAC20G4.07C;SPAC20G8.07C
SPCC4G3.17	GO Biological Process	GO:0043038	amino acid activation	Enriched	2.72277227722772 (11/404)	0.759493670886076 (39/5135)	0.00509043	SPAC2F7.13C;SPAC29E6.06C;SPAC17A5.15C;SPBC2G2.12;SPBC342.02;SPBC1773.10C;SPAC3F10.03;SPBC1709.02C;SPBC25H2.02;SPAC3G9.06;SPBC17A3.04C
SPAP7G5.04c	GO Biological Process	GO:0043039	tRNA aminoacylation	Enriched	2.72277227722772 (11/404)	0.759493670886076 (39/5135)	0.00509043	SPAC2F7.13C;SPAC29E6.06C;SPAC17A5.15C;SPBC2G2.12;SPBC342.02;SPBC1773.10C;SPAC3F10.03;SPBC1709.02C;SPBC25H2.02;SPAC3G9.06;SPBC17A3.04C
SPAC23C11.05	GO Biological Process	GO:0034645	cellular macromolecule biosynthetic process	Enriched	29.2079207920792 (118/404)	21.4800389483934 (1103/5135)	0.00526038	SPAPB17E12.13;SPAC3H5.05C;SPAC23C4.15;SPAC1B3.12C;SPAC57A7.12;SPCC4B3.07;SPCC74.05;SPCC285.15C;SPCC364.03;SPBC577.12;SPBC6B1.08C;SPAC23G3.04;SPBC428.18;SPAC2F7.13C;SPAC3G9.09C;SPAC6G9.09C;SPAC31G5.03;SPAC29E6.06C;SPAC22A12.13;SPAC17H9.02;SPAC16E8.15;SPAC3H5.07;SPAC17A5.15C;SPBC3B9.07C;SPBC2G2.12;SPBC342.06C;SPBC1718.03;SPAC27E2.02;SPBC342.02;SPAC3A12.13C;SPBP8B7.06;SPBC11C11.07;SPAC29A4.02C;SPAC2…
SPAC683.02c	GO Biological Process	GO:0009059	macromolecule biosynthetic process	Enriched	29.2079207920792 (118/404)	21.5384615384615 (1106/5135)	0.00541329	SPAPB17E12.13;SPAC3H5.05C;SPAC23C4.15;SPAC1B3.12C;SPAC57A7.12;SPCC4B3.07;SPCC74.05;SPCC285.15C;SPCC364.03;SPBC577.12;SPBC6B1.08C;SPAC23G3.04;SPBC428.18;SPAC2F7.13C;SPAC3G9.09C;SPAC6G9.09C;SPAC31G5.03;SPAC29E6.06C;SPAC22A12.13;SPAC17H9.02;SPAC16E8.15;SPAC3H5.07;SPAC17A5.15C;SPBC3B9.07C;SPBC2G2.12;SPBC342.06C;SPBC1718.03;SPAC27E2.02;SPBC342.02;SPAC3A12.13C;SPBP8B7.06;SPBC11C11.07;SPAC29A4.02C;SPAC2…
SPCC4B3.06c	GO Biological Process	GO:0006810	transport	Underrepresented	10.6435643564356 (43/404)	17.2736124634859 (887/5135)	0.00547572	SPBC776.04;SPAC1B1.03C;SPCC285.15C;SPAC1039.01;SPBP8B7.21;SPBC27.01C;SPAC20G4.07C;SPBC19G7.17;SPBC1773.07C;SPAC6G10.07;SPBC530.15C;SPAC20G8.07C;SPAC14C4.11;SPBC16H5.08C;SPBC1711.05;SPCC1682.09C;SPBC15C4.04C;SPBC36.01C;SPAC4F8.03;SPCC1840.08C;SPAC15F9.02;SPAC19G12.05;SPCC569.05C;SPBC12C2.06;SPAC17G6.15C;SPAC3C7.08C;SPAC3F10.04;SPBC16D10.06;SPBC365.11;SPBC409.08;SPBC3B9.05;SPBC3H7.09;SPBC29A3.11C;S…
SPBC14F5.09c	GO Biological Process	GO:0006164	purine nucleotide biosynthetic process	Enriched	3.21782178217822 (13/404)	1.03213242453749 (53/5135)	0.00597553	SPCC4B3.18;SPAC144.03;SPBC2F12.14C;SPBC839.16;SPAC6F12.10C;SPAP7G5.02C;SPAC4D7.08C;SPBC405.01;SPCC1322.13;SPAC4G9.03;SPBC14F5.09C;SPAC23A1.03;SPBC2G2.08
SPAC22A12.10	GO Biological Process	GO:0046033	AMP metabolic process	Enriched	0.99009900990099 (4/404)	0.0973709834469328 (5/5135)	0.0063146	SPAC144.03;SPAC4G9.03;SPBC14F5.09C;SPAC23A1.03
SPAC3C7.08c	GO Biological Process	GO:0002183	cytoplasmic translational initiation	Enriched	2.72277227722772 (11/404)	0.778967867575463 (40/5135)	0.00631515	SPAC3G9.09C;SPAC16E8.15;SPAC3A12.13C;SPBC17D11.05;SPAC4D7.09;SPBC14F5.06;SPBC4C3.07;SPAC8C9.15C;SPBC18H10.04C;SPAC343.14C;SPBC17G9.09
SPBC685.06	GO Biological Process	GO:0006555	methionine metabolic process	Enriched	2.22772277227723 (9/404)	0.545277507302824 (28/5135)	0.00666125	SPBC23E6.10C;SPBC106.17C;SPCC1739.06C;SPBC4C3.03;SPAC56F8.10;SPAC13G7.06;SPAC16C9.02C;SPAC7D4.07C;SPAC1782.11
SPSNORNA.08	GO Biological Process	GO:0048518	positive regulation of biological process	Underrepresented	2.72277227722772 (11/404)	6.93281402142162 (356/5135)	0.00718889	SPCC4B3.07;SPBC6B1.08C;SPBC1734.14C;SPCC338.07C;SPAC31G5.13;SPCC285.17;SPAC9E9.13;SPAC7D4.07C;SPAC22E12.07;SPCC737.06C;SPBC16A3.11
SPAC4D7.08c	GO Biological Process	GO:1903046	meiotic cell cycle process	Underrepresented	0.495049504950495 (2/404)	3.31061343719572 (170/5135)	0.00726848	SPAC20G4.07C;SPAC20G8.07C
SPAC1B2.03c	GO Biological Process	GO:0009086	methionine biosynthetic process	Enriched	1.98019801980198 (8/404)	0.447906523855891 (23/5135)	0.00803651	SPBC23E6.10C;SPBC106.17C;SPCC1739.06C;SPAC56F8.10;SPAC13G7.06;SPAC16C9.02C;SPAC7D4.07C;SPAC1782.11
SPBC4C3.07	GO Biological Process	GO:0009127	purine nucleoside monophosphate biosynthetic process	Enriched	2.47524752475248 (10/404)	0.68159688412853 (35/5135)	0.00846673	SPAC144.03;SPBC2F12.14C;SPAC6F12.10C;SPAP7G5.02C;SPAC4D7.08C;SPBC405.01;SPCC1322.13;SPAC4G9.03;SPBC14F5.09C;SPAC23A1.03
SPAC23C4.15	GO Biological Process	GO:0009168	purine ribonucleoside monophosphate biosynthetic process	Enriched	2.47524752475248 (10/404)	0.68159688412853 (35/5135)	0.00846673	SPAC144.03;SPBC2F12.14C;SPAC6F12.10C;SPAP7G5.02C;SPAC4D7.08C;SPBC405.01;SPCC1322.13;SPAC4G9.03;SPBC14F5.09C;SPAC23A1.03
SPAC4C5.04	GO Biological Process	GO:0006144	purine nucleobase metabolic process	Enriched	1.73267326732673 (7/404)	0.350535540408958 (18/5135)	0.00890391	SPBC839.16;SPAC4D7.08C;SPBC405.01;SPCC1322.13;SPAC23A1.03;SPBC2G2.08;SPBC1198.02
SPAC694.04c	GO Biological Process	GO:0051704	multi-organism process	Underrepresented	0.495049504950495 (2/404)	3.15481986368062 (162/5135)	0.00975981	SPAC20G4.07C;SPAC20G8.07C
SPBC713.04c	Gene Expression		Core Environmental Stress Response repressed	Enriched	34.6534653465347 (140/404)	8.5491723466407 (439/5135)	4.49813e-52	SPAPB17E12.13;SPCC18.12C;SPAC3H5.05C;SPBC1703.05;SPAC959.03C;SPAC9E9.06C;SPBC30D10.15;SPAC17G8.08C;SPAC57A7.12;SPCC74.05;SPCC285.15C;SPBC1271.04C;SPCC364.03;SPBC16A3.08C;SPBC23E6.05;SPBC1734.14C;SPCC16C4.08C;SPAC3G9.09C;SPAC6G9.09C;SPAC23C4.06C;SPAC31G5.03;SPBC1604.06C;SPAC1782.10C;SPBC11G11.03;SPAC3H5.07;SPCC320.11C;SPBC3B9.07C;SPBC106.15;SPBC646.10C;SPAC17G8.06C;SPAC20H4.01;SPBP8B7.06;SPBC11C11…
SPBPB10D8.04c	Gene Expression		Caffeine and Rapamycin repressed	Enriched	28.7128712871287 (116/404)	5.92015579357351 (304/5135)	3.11403e-51	SPCC18.12C;SPAC3H5.05C;SPAC1786.02;SPAC959.03C;SPAC57A7.12;SPCC74.05;SPCC285.15C;SPCC4B3.18;SPCC364.03;SPBC16A3.08C;SPBC23E6.05;SPCC16C4.08C;SPAC6G9.09C;SPAC31G5.03;SPAC1782.10C;SPBC11G11.03;SPAC3H5.07;SPCC320.11C;SPBC3B9.07C;SPBC1718.03;SPAC23G3.06;SPBP8B7.06;SPBC11C11.07;SPAC29A4.02C;SPCC1183.08C;SPCC1739.06C;SPCC338.11C;SPCP31B10.08C;SPBC14F5.06;SPAC1B2.03C;SPAC8C9.10C;SPCC126.03;SPBC365.03C;S…
SPAC222.08c	Gene Expression		Ribosomal protein module 2	Enriched	24.2574257425743 (98/404)	5.2190847127556 (268/5135)	1.33878e-40	SPAPB17E12.13;SPAC3H5.05C;SPAC9E9.06C;SPBC11B10.02C;SPCC74.05;SPBC215.09C;SPCC285.15C;SPBC1271.04C;SPCC364.03;SPBC16A3.08C;SPBC1677.03C;SPBC23E6.05;SPAC56E4.03;SPAC6G9.09C;SPAC31G5.03;SPAC11D3.02C;SPBC27.08C;SPAC1782.10C;SPAC3H5.07;SPBC646.10C;SPAC17G8.06C;SPCC1442.09;SPBC106.17C;SPBP8B7.06;SPBC11C11.07;SPCC1183.08C;SPBC25H2.05;SPBC839.16;SPCC1739.06C;SPAC6F12.10C;SPCP31B10.08C;SPAC10F6.01C;SPAPJ…
SPBC244.02c	Gene Expression		Oxidative Stess Cluster 6	Enriched	17.8217821782178 (72/404)	3.48588120740019 (179/5135)	6.3826e-32	SPAC3H5.05C;SPAC9E9.06C;SPAC17G8.08C;SPAC57A7.12;SPCC74.05;SPCC285.15C;SPBC1271.04C;SPCC364.03;SPBC16A3.08C;SPBC1734.14C;SPAC3G9.09C;SPAC6G9.09C;SPAC23C4.06C;SPAC31G5.03;SPAC3H5.07;SPBC3B9.07C;SPBC106.15;SPBC646.10C;SPAC17G8.06C;SPBP8B7.06;SPBC11C11.07;SPCC1183.08C;SPBC25H2.05;SPCP31B10.08C;SPBC365.03C;SPBC685.06;SPBC4C3.07;SPAC607.03C;SPCC1223.08C;SPBC19C7.07C;SPAC13G6.02C;SPBC18H10.13;SPCC1223.…
SPAC2F3.04c	Gene Expression		Ribosomal protein module Homol D E	Enriched	17.8217821782178 (72/404)	4.32327166504382 (222/5135)	6.4317e-25	SPAPB17E12.13;SPAC3H5.05C;SPAC57A7.12;SPCC74.05;SPCC285.15C;SPCC364.03;SPBC16A3.08C;SPAC3G9.09C;SPAC6G9.09C;SPAC31G5.03;SPAC11D3.02C;SPBC27.08C;SPAC3H5.07;SPBC646.10C;SPAC17G8.06C;SPBP8B7.06;SPBC11C11.07;SPBC1711.13;SPCC1183.08C;SPBC25H2.05;SPBC839.16;SPCP31B10.08C;SPAC10F6.01C;SPBC365.03C;SPAP7G5.04C;SPAC31G5.04;SPBC685.06;SPCC1223.05C;SPAC607.03C;SPCC1223.08C;SPAC13G6.02C;SPBC18H10.13;SPBC1711.…
SPAC3A12.13c	Gene Expression		Highly expressed genes	Enriched	24.5049504950495 (99/404)	8.89970788704966 (457/5135)	4.56105e-20	SPAC3H5.05C;SPAC1786.02;SPAC2E1P3.05C;SPAC57A7.12;SPCC74.05;SPBC215.09C;SPCC285.15C;SPCC364.03;SPBC16A3.08C;SPAC3G9.09C;SPAC56E4.03;SPAC6G9.09C;SPAC31G5.03;SPBC27.08C;SPAC3H5.07;SPAC17A5.15C;SPAC144.03;SPBC646.10C;SPCC24B10.21;SPAC23G3.06;SPBP8B7.06;SPAC110.04C;SPBC11C11.07;SPCC1183.08C;SPBC17D11.05;SPBC25H2.05;SPBC839.16;SPAC6F12.10C;SPCP31B10.08C;SPAC10F6.01C;SPAC1B2.03C;SPCC645.14C;SPBC365.03C…
SPAC25B8.17	Gene Expression		Oxidative Stess Cluster 9	Enriched	12.8712871287129 (52/404)	2.88218111002921 (148/5135)	3.60023e-19	SPAPB17E12.13;SPAC3H5.05C;SPCC74.05;SPCC285.15C;SPCC364.03;SPBC16A3.08C;SPAC6G9.09C;SPAC31G5.03;SPAC3H5.07;SPBP8B7.06;SPBC11C11.07;SPBC25H2.05;SPCC1183.08C;SPCP31B10.08C;SPAPJ760.03C;SPBC365.03C;SPBC685.06;SPCC1223.05C;SPBC4C3.07;SPAC607.03C;SPAC13G6.02C;SPBC18H10.13;SPAC26A3.17C;SPAP7G5.02C;SPAC24H6.07;SPBC776.01;SPBC29A3.12;SPCC663.04;SPCC970.05;SPBC685.07C;SPCC1322.15;SPBC336.10C;SPCC962.04;SP…
SPBP8B7.12c	Gene Expression		Oxidative Stess Cluster 11	Enriched	9.40594059405941 (38/404)	2.27848101265823 (117/5135)	1.64052e-12	SPAPB17E12.13;SPCC74.05;SPCC285.15C;SPCC364.03;SPBC16A3.08C;SPAC6G9.09C;SPAC31G5.03;SPAC3H5.07;SPBP8B7.06;SPBC11C11.07;SPBC25H2.05;SPCC1183.08C;SPCP31B10.08C;SPBC365.03C;SPBC685.06;SPBC4C3.07;SPAC13G6.02C;SPAC24H6.07;SPBC776.01;SPBC29A3.12;SPCC663.04;SPCC970.05;SPBC685.07C;SPCC613.05C;SPAC1F7.13C;SPBC18H10.12C;SPAC890.08;SPAC959.07;SPAC30D11.12;SPBC29B5.03C;SPAC1782.11;SPCC5E4.07;SPCC613.06;SPAC6…
SPAC6C3.09	Gene Expression		Oxidative Stess Cluster 4	Underrepresented	0.495049504950495 (2/404)	8.00389483933788 (411/5135)	1.99916e-10	SPAC1F12.10C;SPAC18B11.02C
SPAC1142.04	Gene Expression		Core Environmental Stress Response induced	Underrepresented	1.98019801980198 (8/404)	10.4381694255112 (536/5135)	2.33023e-09	SPAC343.09;SPAC1F12.10C;SPCC569.05C;SPAC11D3.13;SPAC7D4.07C;SPAC18B11.02C;SPBC36.02C;SPBC609.04
SPAC15F9.02	Gene Expression		Oxidative Stess Cluster 10	Enriched	4.95049504950495 (20/404)	1.18792599805258 (61/5135)	1.58876e-06	SPCC18.12C;SPBC1703.05;SPBC30D10.15;SPCC16C4.08C;SPBC1604.06C;SPCC320.11C;SPAC10F6.10;SPAC140.02;SPCC24B10.18;SPBC1289.07C;SPAC890.04C;SPCC1450.03;SPAC926.08C;SPBC83.15;SPAC56F8.09;SPAC6G9.02C;SPCC4G3.18;SPBC365.04C;SPBC244.02C;SPAC27F1.06C
SPBC11C11.02	Gene Expression		Reproduction module	Underrepresented	0.742574257425743 (3/404)	5.74488802336904 (295/5135)	7.24422e-06	SPAC1039.01;SPAC11D3.04C;SPBC1271.09
SPBC1711.08	Gene Expression		Oxidative Stess Cluster 2	Enriched	9.9009900990099 (40/404)	4.14800389483934 (213/5135)	1.07192e-05	SPAC16.03C;SPAPB1A10.05;SPBP8B7.17C;SPAC343.09;SPBC1271.04C;SPBP8B7.21;SPAC24C9.03;SPBC6B1.08C;SPBC21C3.15C;SPAC23G3.04;SPAC30.03C;SPCC5E4.05C;SPAC16E8.15;SPBC342.06C;SPBC1718.03;SPAC27E2.02;SPCC663.09C;SPAC664.01C;SPCC645.14C;SPCC1223.08C;SPAC31G5.13;SPBPB10D8.04C;SPBC25H2.02;SPAC4F8.03;SPAC31G5.01;SPAC9E9.13;SPAC20H4.08;SPAC1071.12C;SPCC4G3.14;SPBC365.11;SPAC22E12.07;SPBC2G2.11;SPAC22A12.14C;SP…
SPBC1711.05	Gene Expression		Middle meiotic genes	Underrepresented	3.71287128712871 (15/404)	10.6718597857838 (548/5135)	1.65204e-05	SPBC776.04;SPBC577.12;SPAC30.03C;SPAC22A12.13;SPAC26F1.05;SPAC3A12.13C;SPAC20H4.01;SPCC1682.08C;SPAC1B2.03C;SPBC3H7.14;SPAC11G7.06C;SPBC3H7.09;SPAC56F8.05C;SPBC36B7.02;SPBC2D10.12
SPCP31B10.08c	Gene Expression		Caffeine and Rapamycin induced	Underrepresented	1.23762376237624 (5/404)	5.60856864654333 (288/5135)	0.000391628	SPAC2E1P3.05C;SPAC1039.01;SPAC56E4.03;SPBPJ4664.02;SPBC1271.09
SPCC1322.13	Gene Expression		Meiosis sporulation module	Underrepresented	1.23762376237624 (5/404)	5.25803310613437 (270/5135)	0.000964646	SPBC577.12;SPCC1682.08C;SPAC11G7.06C;SPBC3H7.09;SPCPJ732.03
SPBC3H7.09	Gene Expression		Induced pat1.114 mutant	Enriched	12.6237623762376 (51/404)	7.14703018500487 (367/5135)	0.00189628	SPAC3H5.05C;SPCC1753.04;SPBC215.09C;SPAC1A6.10;SPBC8D2.16C;SPBC577.12;SPBC27.01C;SPBP4H10.14C;SPAC3G9.09C;SPAC222.08C;SPAC29E6.06C;SPBC646.07C;SPAC17A5.15C;SPBC2G2.12;SPBC23E6.10C;SPBC342.02;SPCC663.09C;SPAC22A12.10;SPAC4D7.09;SPBC23E6.06C;SPAC664.01C;SPBC1105.01;SPAPB17E12.05;SPBP23A10.07;SPCC970.05;SPBC15C4.04C;SPBC582.09;SPBC409.13;SPCC16A11.10C;SPCC1840.08C;SPAC11D3.04C;SPAC19G12.05;SPBC32H8.…
SPBC530.15c	Gene Expression		Nitrogen depletion total meiotic genes	Underrepresented	0.742574257425743 (3/404)	4.05063291139241 (208/5135)	0.00241497	SPAC1039.01;SPBC1271.09;SPBC3D6.06C
SPBP8B7.21	Gene Expression		Induced diploid cells	Enriched	4.45544554455445 (18/404)	1.79162609542356 (92/5135)	0.0080171	SPAC343.09;SPBC1734.14C;SPAC16E8.15;SPAC17G8.06C;SPAPJ760.03C;SPAC31G5.04;SPBC1711.05;SPAC26A3.17C;SPAC8C9.15C;SPBC1289.07C;SPBC1289.12;SPBC14F5.09C;SPAC22A12.05;SPBC19C2.07;SPBC16D10.06;SPAPB8E5.09;SPAC4A8.06C;SPBC2D10.10C
SPAC2F3.03c	Gene Features		Average intron length	Higher	118.503	92.4717	2.0528e-05	SPAC24H6.07;SPAC13G7.08C;SPAC3F10.04;SPAC926.05C;SPAPB18E9.01;SPAC17D4.04;SPAC30D11.12;SPAC22A12.14C;SPAC22A12.16;SPAC4C5.01;SPAPB17E12.05;SPAP27G11.13C;SPAC664.04C;SPAC16E8.11C;SPAC8C9.10C;SPAP7G5.02C;SPAC694.04C;SPAC25G10.05C;SPAC30.03C;SPAC9E9.06C;SPAC144.03;SPAC26F1.12C;SPAC1F3.07C;SPAC10F6.10;SPAC3A12.13C;SPAP27G11.04C;SPAC4F8.03;SPAC3G9.09C;SPAC3H5.07;SPAC23A1.11;SPAC10F6.03C;SPAC110.04C;SP…
SPBC342.02	Gene Features		Length of first intron	Higher	114.267	91.8919	0.000411868	SPAC24H6.07;SPAC13G7.08C;SPAC3F10.04;SPAC926.05C;SPAPB18E9.01;SPAC17D4.04;SPAC30D11.12;SPAC22A12.14C;SPAC22A12.16;SPAC4C5.01;SPAPB17E12.05;SPAP27G11.13C;SPAC664.04C;SPAC16E8.11C;SPAC8C9.10C;SPAP7G5.02C;SPAC694.04C;SPAC25G10.05C;SPAC30.03C;SPAC9E9.06C;SPAC144.03;SPAC26F1.12C;SPAC1F3.07C;SPAC10F6.10;SPAC3A12.13C;SPAP27G11.04C;SPAC4F8.03;SPAC3G9.09C;SPAC3H5.07;SPAC23A1.11;SPAC10F6.03C;SPAC110.04C;SP…
SPBC685.07c	Phenotypes (FYPO)	FYPO:0000128	auxotrophy	Enriched	4.95049504950495 (20/404)	1.05160662122687 (54/5135)	1.7426e-07	SPAC16.03C;SPBC11B10.02C;SPCC1753.04;SPAC56F8.04C;SPBC27.08C;SPAC144.03;SPBC106.17C;SPBC36.04;SPAC10F6.01C;SPAP7G5.04C;SPAC31G5.04;SPAC56F8.10;SPAC25G10.05C;SPAC4D7.08C;SPAC13G7.06;SPAC7D4.07C;SPAC57A10.12C;SPBC3B8.03;SPAC227.18;SPAC1782.11
SPBC36.04	Phenotypes (FYPO)	FYPO:0000004	cell viability	Enriched	99.5049504950495 (402/404)	94.2161635832522 (4838/5135)	1.08139e-06	SPAPB17E12.13;SPAPB18E9.01;SPCC18.12C;SPAC3H5.05C;SPAC1786.02;SPAC16.03C;SPBC1703.05;SPAC23C4.15;SPAC959.03C;SPAC9E9.06C;SPBC776.04;SPBC30D10.15;SPAC17G8.08C;SPAPB1A10.05;SPAC343.01C;SPBP8B7.17C;SPBC11B10.02C;SPAC343.09;SPAC2E1P3.05C;SPAC1B3.12C;SPAC57A7.12;SPCC4B3.07;SPAC977.11;SPCC1753.04;SPCC74.05;SPAC1B1.03C;SPBC215.09C;SPCC285.15C;SPAC1A6.10;SPAC25B8.17;SPAC1F8.08;SPAC630.06C;SPAC1039.01;SPA…
SPAC977.15	Phenotypes (FYPO)	FYPO:0002061	inviable vegetative cell population	Enriched	40.3465346534653 (163/404)	27.9844206426485 (1437/5135)	2.4142e-06	SPCC18.12C;SPAC1786.02;SPBC1703.05;SPAC23C4.15;SPAC959.03C;SPAC9E9.06C;SPBC776.04;SPBC30D10.15;SPAC343.01C;SPBP8B7.17C;SPAC1B3.12C;SPCC1753.04;SPAC1B1.03C;SPBC215.09C;SPAC56F8.04C;SPBC1271.04C;SPCC4B3.18;SPAC24C9.03;SPBC713.12;SPBC27.01C;SPBC1677.03C;SPBC428.18;SPAC2F7.13C;SPBC1734.14C;SPCC16C4.08C;SPAC3G9.09C;SPBC115.01C;SPAC29E6.06C;SPBC1604.06C;SPAC1782.10C;SPAC22A12.13;SPBC646.07C;SPAC17H9.02…
SPCC663.09c	Phenotypes (FYPO)	FYPO:0002151	inviable spore	Enriched	17.5742574257426 (71/404)	9.19182083739046 (472/5135)	2.68321e-06	SPCC18.12C;SPBC1703.05;SPAC23C4.15;SPAC959.03C;SPAC9E9.06C;SPAC343.01C;SPCC1753.04;SPAC1B1.03C;SPBC215.09C;SPAC24C9.03;SPBC1677.03C;SPBC1734.14C;SPAC2F7.13C;SPAC3G9.09C;SPBC115.01C;SPAC29E6.06C;SPAC17A5.15C;SPCC320.11C;SPBC2G2.12;SPBC106.15;SPBC646.10C;SPCC1442.09;SPBC1773.07C;SPAC20H4.01;SPAC23G3.06;SPCC1183.08C;SPBC17D11.05;SPAC4D7.09;SPBC23E6.06C;SPBC14F5.06;SPBC1773.10C;SPCC1795.05C;SPAC1420.…
SPAC23H3.09c	Phenotypes (FYPO)	FYPO:0002059	inviable cell population	Enriched	40.3465346534653 (163/404)	28.1986368062317 (1448/5135)	4.59955e-06	SPCC18.12C;SPAC1786.02;SPBC1703.05;SPAC23C4.15;SPAC959.03C;SPAC9E9.06C;SPBC776.04;SPBC30D10.15;SPAC343.01C;SPBP8B7.17C;SPAC1B3.12C;SPCC1753.04;SPAC1B1.03C;SPBC215.09C;SPAC56F8.04C;SPBC1271.04C;SPCC4B3.18;SPAC24C9.03;SPBC713.12;SPBC27.01C;SPBC1677.03C;SPBC428.18;SPAC2F7.13C;SPBC1734.14C;SPCC16C4.08C;SPAC3G9.09C;SPBC115.01C;SPAC29E6.06C;SPBC1604.06C;SPAC1782.10C;SPAC22A12.13;SPBC646.07C;SPAC17H9.02…
SPAC17G8.08c	Phenotypes (FYPO)	FYPO:0000047	normal cell population growth	Underrepresented	6.43564356435644 (26/404)	15.014605647517 (771/5135)	5.14422e-06	SPBC11B10.02C;SPCC1753.04;SPBP8B7.21;SPBC16A3.08C;SPAC20G4.07C;SPBC36.07;SPAC30.03C;SPBC106.17C;SPAC18G6.07C;SPBC36.04;SPAC664.01C;SPAC140.02;SPAC31G5.13;SPAC7D4.07C;SPAC1071.12C;SPBC3B8.03;SPAC3F10.04;SPAC9.02C;SPBC16D10.06;SPAC20H4.03C;SPBC16A3.11;SPCC553.07C;SPAC323.01C;SPCC965.14C;SPBC609.04;SPBC36.06C
SPAC8F11.04	Phenotypes (FYPO)	FYPO:0001357	normal vegetative cell population growth	Underrepresented	6.43564356435644 (26/404)	14.9561830574489 (768/5135)	5.14422e-06	SPBC11B10.02C;SPCC1753.04;SPBP8B7.21;SPBC16A3.08C;SPAC20G4.07C;SPBC36.07;SPAC30.03C;SPBC106.17C;SPAC18G6.07C;SPBC36.04;SPAC664.01C;SPAC140.02;SPAC31G5.13;SPAC7D4.07C;SPAC1071.12C;SPBC3B8.03;SPAC3F10.04;SPAC9.02C;SPBC16D10.06;SPAC20H4.03C;SPBC16A3.11;SPCC553.07C;SPAC323.01C;SPCC965.14C;SPBC609.04;SPBC36.06C
SPCC1450.03	Phenotypes (FYPO)	FYPO:0000001	phenotype	Enriched	100 (404/404)	96.0272638753651 (4931/5135)	6.15287e-06	SPAPB17E12.13;SPAPB18E9.01;SPCC18.12C;SPAC3H5.05C;SPAC1786.02;SPAC16.03C;SPBC1703.05;SPAC23C4.15;SPAC959.03C;SPAC9E9.06C;SPBC776.04;SPBC30D10.15;SPAC17G8.08C;SPAPB1A10.05;SPAC343.01C;SPBP8B7.17C;SPBC11B10.02C;SPAC343.09;SPAC2E1P3.05C;SPAC1B3.12C;SPAC57A7.12;SPCC4B3.07;SPAC977.11;SPCC1753.04;SPCC74.05;SPAC1B1.03C;SPBC215.09C;SPCC285.15C;SPAC1A6.10;SPAC25B8.17;SPAC1F8.08;SPAC630.06C;SPAC1039.01;SPA…
SPCC613.05c	Phenotypes (FYPO)	FYPO:0000136	cellular physical quality phenotype	Enriched	99.5049504950495 (402/404)	94.8588120740019 (4871/5135)	9.35494e-06	SPAPB17E12.13;SPAPB18E9.01;SPCC18.12C;SPAC3H5.05C;SPAC1786.02;SPAC16.03C;SPBC1703.05;SPAC23C4.15;SPAC959.03C;SPAC9E9.06C;SPBC776.04;SPBC30D10.15;SPAC17G8.08C;SPAPB1A10.05;SPAC343.01C;SPBP8B7.17C;SPBC11B10.02C;SPAC343.09;SPAC2E1P3.05C;SPAC1B3.12C;SPAC57A7.12;SPCC4B3.07;SPAC977.11;SPCC1753.04;SPCC74.05;SPAC1B1.03C;SPBC215.09C;SPCC285.15C;SPAC1A6.10;SPAC25B8.17;SPAC1F8.08;SPAC630.06C;SPAC1039.01;SPA…
SPAC1786.02	Phenotypes (FYPO)	FYPO:0001991	inviable after spore germination, without cell division	Enriched	17.5742574257426 (71/404)	9.58130477117819 (492/5135)	1.65921e-05	SPBC1703.05;SPAC23C4.15;SPAC959.03C;SPAC1B3.12C;SPCC1753.04;SPAC1B1.03C;SPAC24C9.03;SPBC713.12;SPBC1677.03C;SPBC27.01C;SPBC428.18;SPBC1734.14C;SPBC115.01C;SPBC1604.06C;SPAC22A12.13;SPBC646.07C;SPAC16E8.15;SPCC320.11C;SPBC2G2.12;SPBC106.15;SPBC342.02;SPCC1442.09;SPAC18G6.07C;SPBC2F12.14C;SPCC1183.08C;SPCP31B10.08C;SPAC10F6.10;SPCC1795.05C;SPBC4C3.03;SPCC1223.14;SPBP16F5.06;SPAC56F8.10;SPAP7G5.02C;…
SPAC23H4.09	Phenotypes (FYPO)	FYPO:0000002	cell phenotype	Enriched	99.5049504950495 (402/404)	95.0535540408958 (4881/5135)	1.93173e-05	SPAPB17E12.13;SPAPB18E9.01;SPCC18.12C;SPAC3H5.05C;SPAC1786.02;SPAC16.03C;SPBC1703.05;SPAC23C4.15;SPAC959.03C;SPAC9E9.06C;SPBC776.04;SPBC30D10.15;SPAC17G8.08C;SPAPB1A10.05;SPAC343.01C;SPBP8B7.17C;SPBC11B10.02C;SPAC343.09;SPAC2E1P3.05C;SPAC1B3.12C;SPAC57A7.12;SPCC4B3.07;SPAC977.11;SPCC1753.04;SPCC74.05;SPAC1B1.03C;SPBC215.09C;SPCC285.15C;SPAC1A6.10;SPAC25B8.17;SPAC1F8.08;SPAC630.06C;SPAC1039.01;SPA…
SPAC56F8.10	Phenotypes (FYPO)	FYPO:0002058	viable cell population	Underrepresented	64.8514851485149 (262/404)	75.6377799415774 (3884/5135)	3.22686e-05	SPAPB17E12.13;SPAPB18E9.01;SPAC3H5.05C;SPAC1786.02;SPAC16.03C;SPBC776.04;SPAC17G8.08C;SPAPB1A10.05;SPBC11B10.02C;SPAC343.09;SPAC2E1P3.05C;SPAC57A7.12;SPCC4B3.07;SPAC977.11;SPCC1753.04;SPCC74.05;SPAC1B1.03C;SPCC285.15C;SPAC1A6.10;SPAC25B8.17;SPAC1F8.08;SPAC630.06C;SPAC1039.01;SPAC56F8.04C;SPBP8B7.21;SPCC364.03;SPBC577.12;SPBC8D2.16C;SPBC16A3.08C;SPAC16C9.06C;SPBC23E6.05;SPBC6B1.08C;SPBC21C3.15C;SP…
SPBC543.02c	Phenotypes (FYPO)	FYPO:0002057	cell population viability	Enriched	99.7524752475248 (403/404)	95.715676728335 (4915/5135)	3.33636e-05	SPAPB17E12.13;SPAPB18E9.01;SPCC18.12C;SPAC3H5.05C;SPAC1786.02;SPAC16.03C;SPBC1703.05;SPAC23C4.15;SPAC959.03C;SPAC9E9.06C;SPBC776.04;SPBC30D10.15;SPAC17G8.08C;SPAPB1A10.05;SPAC343.01C;SPBP8B7.17C;SPBC11B10.02C;SPAC343.09;SPAC2E1P3.05C;SPAC1B3.12C;SPAC57A7.12;SPCC4B3.07;SPAC977.11;SPCC1753.04;SPCC74.05;SPAC1B1.03C;SPBC215.09C;SPCC285.15C;SPAC1A6.10;SPAC25B8.17;SPAC1F8.08;SPAC630.06C;SPAC1039.01;SPA…
SPAC16E8.15	Phenotypes (FYPO)	FYPO:0000003	cell population phenotype	Enriched	99.7524752475248 (403/404)	95.9493670886076 (4927/5135)	6.83083e-05	SPAPB17E12.13;SPAPB18E9.01;SPCC18.12C;SPAC3H5.05C;SPAC1786.02;SPAC16.03C;SPBC1703.05;SPAC23C4.15;SPAC959.03C;SPAC9E9.06C;SPBC776.04;SPBC30D10.15;SPAC17G8.08C;SPAPB1A10.05;SPAC343.01C;SPBP8B7.17C;SPBC11B10.02C;SPAC343.09;SPAC2E1P3.05C;SPAC1B3.12C;SPAC57A7.12;SPCC4B3.07;SPAC977.11;SPCC1753.04;SPCC74.05;SPAC1B1.03C;SPBC215.09C;SPCC285.15C;SPAC1A6.10;SPAC25B8.17;SPAC1F8.08;SPAC630.06C;SPAC1039.01;SPA…
SPCC285.17	Phenotypes (FYPO)	FYPO:0000627	normal cellular process	Underrepresented	5.1980198019802 (21/404)	12.2687439143135 (630/5135)	7.3223e-05	SPCC4B3.07;SPBC428.18;SPAC30.03C;SPAC17H9.02;SPAC20G8.07C;SPAC664.01C;SPAC31G5.13;SPAC15F9.02;SPCC1322.13;SPAC17D4.04;SPAC1071.12C;SPAC3F10.04;SPBC3H7.09;SPAC20H4.03C;SPBC16A3.11;SPAC1F7.05;SPAC23A1.03;SPCPJ732.03;SPBC685.09;SPBC36.06C;SPBC4C3.05C
SPBC2F12.07c	Phenotypes (FYPO)	FYPO:0001331	cellular process phenotype during vegetative growth	Underrepresented	14.3564356435644 (58/404)	23.8169425511198 (1223/5135)	8.60994e-05	SPCC4B3.07;SPAC56F8.04C;SPCC4B3.18;SPBC16A3.08C;SPAC16C9.06C;SPBC6B1.08C;SPBC428.18;SPAC20G4.07C;SPBC1734.14C;SPCC16C4.08C;SPAC3G9.09C;SPBC27.08C;SPAC30.03C;SPAC17H9.02;SPBC342.06C;SPBC1773.07C;SPAC18G6.07C;SPAC23G3.06;SPBC1215.02C;SPAC20G8.07C;SPBC36.04;SPAC664.01C;SPBC1861.02;SPAC140.02;SPCC1223.05C;SPBC18E5.03C;SPCC1682.04;SPAC31G5.13;SPAC4D7.08C;SPAC15F9.02;SPBC336.10C;SPCC1322.13;SPCC1450.03…
SPAC20G8.07c	Phenotypes (FYPO)	FYPO:0000049	inviable cell	Enriched	39.6039603960396 (160/404)	28.8607594936709 (1482/5135)	8.815e-05	SPCC18.12C;SPBC1703.05;SPAC23C4.15;SPAC959.03C;SPAC9E9.06C;SPBC30D10.15;SPAC343.01C;SPBP8B7.17C;SPAC1B3.12C;SPCC1753.04;SPAC1B1.03C;SPBC215.09C;SPAC56F8.04C;SPBC1271.04C;SPCC4B3.18;SPCC364.03;SPAC24C9.03;SPBC713.12;SPBC27.01C;SPBC1677.03C;SPBC428.18;SPAC2F7.13C;SPBC1734.14C;SPCC16C4.08C;SPAC3G9.09C;SPBC115.01C;SPAC29E6.06C;SPBC1604.06C;SPAC1782.10C;SPAC22A12.13;SPBC646.07C;SPAC17H9.02;SPAC16E8.15…
SPCC18.12c	Phenotypes (FYPO)	FYPO:0000257	normal phenotype	Underrepresented	21.2871287128713 (86/404)	31.7234664070107 (1629/5135)	9.42396e-05	SPBC776.04;SPBC30D10.15;SPAC343.01C;SPBC11B10.02C;SPCC4B3.07;SPCC1753.04;SPCC4B3.18;SPBC1271.04C;SPBP8B7.21;SPAC24C9.03;SPBC16A3.08C;SPBC6B1.08C;SPBC428.18;SPAC20G4.07C;SPBC1734.14C;SPBC36.07;SPBC27.08C;SPAC30.03C;SPAC1782.10C;SPAC17H9.02;SPBC19G7.17;SPCC320.11C;SPBC106.17C;SPAC18G6.07C;SPAC110.04C;SPAC20G8.07C;SPBC36.04;SPAC664.01C;SPAC10F6.01C;SPBC1861.02;SPAC31G5.04;SPAC140.02;SPBC16H5.08C;SPC…
SPAC4G9.03	Phenotypes (FYPO)	FYPO:0001362	abnormal cellular process during vegetative growth	Underrepresented	12.6237623762376 (51/404)	21.713729308666 (1115/5135)	9.49218e-05	SPAC56F8.04C;SPCC4B3.18;SPBC16A3.08C;SPAC16C9.06C;SPBC428.18;SPAC20G4.07C;SPBC1734.14C;SPCC16C4.08C;SPAC3G9.09C;SPBC27.08C;SPAC17H9.02;SPBC342.06C;SPBC1773.07C;SPAC18G6.07C;SPAC23G3.06;SPBC1215.02C;SPAC20G8.07C;SPBC36.04;SPAC664.01C;SPBC1861.02;SPAC140.02;SPCC1223.05C;SPBC18E5.03C;SPCC1682.04;SPAC31G5.13;SPAC4D7.08C;SPBC336.10C;SPCC1322.13;SPCC1450.03;SPAC1F7.13C;SPAC7D4.07C;SPAC1F3.07C;SPAC4C5.0…
SPCC1739.06c	Phenotypes (FYPO)	FYPO:0000138	localization phenotype	Underrepresented	4.45544554455445 (18/404)	10.8860759493671 (559/5135)	0.000155082	SPCC4B3.07;SPCC16C4.08C;SPBC27.08C;SPBC1773.07C;SPBC1215.02C;SPAC20G8.07C;SPAC664.01C;SPBC18E5.03C;SPAC31G5.13;SPAC15F9.02;SPAC7D4.07C;SPCC4B3.08;SPBC16A3.11;SPAC1F7.05;SPAC23A1.03;SPBC685.09;SPBC36.06C;SPBC4C3.05C
SPBC646.10c	Phenotypes (FYPO)	FYPO:0002060	viable vegetative cell population	Underrepresented	63.8613861386139 (258/404)	74.0214216163583 (3801/5135)	0.000162375	SPAPB17E12.13;SPAPB18E9.01;SPAC3H5.05C;SPAC1786.02;SPAC16.03C;SPBC776.04;SPAC17G8.08C;SPAPB1A10.05;SPBC11B10.02C;SPAC343.09;SPAC2E1P3.05C;SPAC57A7.12;SPCC4B3.07;SPAC977.11;SPCC1753.04;SPCC74.05;SPCC285.15C;SPAC1A6.10;SPAC25B8.17;SPAC1F8.08;SPAC630.06C;SPAC1039.01;SPAC56F8.04C;SPBP8B7.21;SPCC364.03;SPBC577.12;SPBC8D2.16C;SPBC16A3.08C;SPAC16C9.06C;SPBC23E6.05;SPBC6B1.08C;SPBC21C3.15C;SPAC23G3.04;SP…
SPAC20G4.07c	Phenotypes (FYPO)	FYPO:0000310	inviable after spore germination, without cell division, with normal germ tube morphology	Enriched	11.6336633663366 (47/404)	5.90068159688413 (303/5135)	0.000238027	SPBC1703.05;SPAC23C4.15;SPAC959.03C;SPCC1753.04;SPAC24C9.03;SPBC27.01C;SPBC1677.03C;SPBC1734.14C;SPBC1604.06C;SPCC320.11C;SPBC2G2.12;SPBC106.15;SPBC342.02;SPCC1442.09;SPBC2F12.14C;SPCC1183.08C;SPCP31B10.08C;SPAC10F6.10;SPCC1795.05C;SPBC4C3.03;SPCC1223.14;SPAC56F8.10;SPAP7G5.02C;SPAC31G5.13;SPBC1709.02C;SPBP23A10.07;SPBC409.13;SPAC31G5.01;SPBC409.15;SPAC890.04C;SPBC16H5.02;SPAC890.08;SPCC1672.07;S…
SPCC1442.09	Phenotypes (FYPO)	FYPO:0003355	growth auxotrophic for sulfur-containing amino acid	Enriched	1.98019801980198 (8/404)	0.292112950340798 (15/5135)	0.000293677	SPBC27.08C;SPBC106.17C;SPBC36.04;SPAC10F6.01C;SPAC56F8.10;SPAC13G7.06;SPAC7D4.07C;SPAC1782.11
SPBC3H7.07c	Phenotypes (FYPO)	FYPO:0000334	cellular component organization phenotype	Underrepresented	9.40594059405941 (38/404)	16.8841285296981 (867/5135)	0.000579078	SPCC4B3.18;SPBC428.18;SPAC20G4.07C;SPCC16C4.08C;SPAC3G9.09C;SPAC17H9.02;SPBC342.06C;SPBC1773.07C;SPAC18G6.07C;SPAC23G3.06;SPBC1215.02C;SPBC36.04;SPAC664.01C;SPAC140.02;SPCC1223.05C;SPBC18E5.03C;SPCC1682.04;SPBC12C2.07C;SPAC31G5.13;SPAC4D7.08C;SPCC1322.13;SPCC1450.03;SPAC1F7.13C;SPAC1F3.07C;SPAC4C5.04;SPBC14F5.09C;SPAC1F12.07;SPCC4B3.08;SPBC543.02C;SPAC1782.11;SPBC11C11.02;SPAC1F7.05;SPBC18H10.04C…
SPAC57A10.12c	Phenotypes (FYPO)	FYPO:0000335	abnormal cellular component organization	Underrepresented	9.40594059405941 (38/404)	16.8646543330088 (866/5135)	0.000579078	SPCC4B3.18;SPBC428.18;SPAC20G4.07C;SPCC16C4.08C;SPAC3G9.09C;SPAC17H9.02;SPBC342.06C;SPBC1773.07C;SPAC18G6.07C;SPAC23G3.06;SPBC1215.02C;SPBC36.04;SPAC664.01C;SPAC140.02;SPCC1223.05C;SPBC18E5.03C;SPCC1682.04;SPBC12C2.07C;SPAC31G5.13;SPAC4D7.08C;SPCC1322.13;SPCC1450.03;SPAC1F7.13C;SPAC1F3.07C;SPAC4C5.04;SPBC14F5.09C;SPAC1F12.07;SPCC4B3.08;SPBC543.02C;SPAC1782.11;SPBC11C11.02;SPAC1F7.05;SPBC18H10.04C…
SPAC24H6.07	Phenotypes (FYPO)	FYPO:0000037	growth auxotrophic for cysteine	Enriched	1.48514851485149 (6/404)	0.175267770204479 (9/5135)	0.000740928	SPBC27.08C;SPBC106.17C;SPBC36.04;SPAC10F6.01C;SPAC13G7.06;SPAC7D4.07C
SPAC25G10.05c	Phenotypes (FYPO)	FYPO:0000316	inviable after spore germination	Enriched	23.5148514851485 (95/404)	15.6572541382668 (804/5135)	0.000775565	SPCC18.12C;SPBC1703.05;SPAC23C4.15;SPAC959.03C;SPAC343.01C;SPBP8B7.17C;SPAC1B3.12C;SPCC1753.04;SPAC1B1.03C;SPAC24C9.03;SPBC713.12;SPBC27.01C;SPBC1677.03C;SPBC428.18;SPBC1734.14C;SPCC16C4.08C;SPBC115.01C;SPBC1604.06C;SPAC22A12.13;SPBC646.07C;SPAC16E8.15;SPBC1861.08C;SPCC320.11C;SPBC3B9.07C;SPBC2G2.12;SPBC106.15;SPBC342.02;SPCC1442.09;SPAC6G10.07;SPAC20H4.01;SPAC18G6.07C;SPBC2F12.14C;SPBC1215.02C;S…
SPAC6F12.10c	Phenotypes (FYPO)	FYPO:0001337	localization phenotype during vegetative growth	Underrepresented	4.45544554455445 (18/404)	10.2044790652386 (524/5135)	0.00102226	SPCC4B3.07;SPCC16C4.08C;SPBC27.08C;SPBC1773.07C;SPBC1215.02C;SPAC20G8.07C;SPAC664.01C;SPBC18E5.03C;SPAC31G5.13;SPAC15F9.02;SPAC7D4.07C;SPCC4B3.08;SPBC16A3.11;SPAC1F7.05;SPAC23A1.03;SPBC685.09;SPBC36.06C;SPBC4C3.05C
SPAC11D3.13	Phenotypes (FYPO)	FYPO:0002333	protein localization phenotype	Underrepresented	3.71287128712871 (15/404)	8.99707887049659 (462/5135)	0.00118199	SPCC4B3.07;SPBC1773.07C;SPBC1215.02C;SPAC20G8.07C;SPAC664.01C;SPBC18E5.03C;SPAC31G5.13;SPAC15F9.02;SPAC7D4.07C;SPCC4B3.08;SPBC16A3.11;SPAC1F7.05;SPBC685.09;SPBC36.06C;SPBC4C3.05C
SPAC17H9.02	Phenotypes (FYPO)	FYPO:0002243	increased acid phosphatase activity	Enriched	1.48514851485149 (6/404)	0.194741966893866 (10/5135)	0.00155881	SPAC144.03;SPAC6F12.10C;SPAC4D7.08C;SPBC405.01;SPCC1322.13;SPBC14F5.09C
SPBC23E6.05	Phenotypes (FYPO)	FYPO:0000140	cellular metabolism phenotype	Underrepresented	5.1980198019802 (21/404)	10.8081791626095 (555/5135)	0.00227155	SPAC56F8.04C;SPCC4B3.18;SPAC16C9.06C;SPAC3G9.09C;SPAC30.03C;SPAC17H9.02;SPBC342.06C;SPBC1215.02C;SPAC664.01C;SPAC140.02;SPAC31G5.13;SPBC336.10C;SPCC1322.13;SPAC17D4.04;SPBC3H7.09;SPCC4B3.08;SPAC20H4.03C;SPBC16A3.11;SPBC21C3.08C;SPAC1F7.05;SPBC685.09
SPAC17G6.11c	Phenotypes (FYPO)	FYPO:0000311	inviable after spore germination with normal, unseptated germ tube morphology	Enriched	9.15841584158416 (37/404)	4.61538461538462 (237/5135)	0.00227155	SPBC1703.05;SPAC23C4.15;SPAC959.03C;SPCC1753.04;SPAC24C9.03;SPBC27.01C;SPBC1604.06C;SPBC2G2.12;SPBC342.02;SPCC1442.09;SPBC2F12.14C;SPCC1183.08C;SPCP31B10.08C;SPAC10F6.10;SPCC1795.05C;SPBC4C3.03;SPCC1223.14;SPAC56F8.10;SPAP7G5.02C;SPBC1709.02C;SPBP23A10.07;SPBC409.13;SPBC409.15;SPAC890.04C;SPBC16H5.02;SPAC890.08;SPCC1672.07;SPAC926.08C;SPBC2G2.11;SPAPB8E5.09;SPBC713.04C;SPAC22E12.13C;SPBC17A3.04C;…
SPBC1773.10c	Phenotypes (FYPO)	FYPO:0000860	abnormal metabolic process	Underrepresented	4.20792079207921 (17/404)	9.50340798442064 (488/5135)	0.00241497	SPCC4B3.18;SPAC16C9.06C;SPAC3G9.09C;SPAC17H9.02;SPBC342.06C;SPBC1215.02C;SPAC664.01C;SPAC140.02;SPAC31G5.13;SPBC336.10C;SPCC1322.13;SPBC3H7.09;SPCC4B3.08;SPAC20H4.03C;SPBC16A3.11;SPAC1F7.05;SPBC685.09
SPAC890.08	Phenotypes (FYPO)	FYPO:0002734	abnormal cell cycle process	Underrepresented	7.17821782178218 (29/404)	13.3398247322298 (685/5135)	0.00266324	SPAC343.09;SPCC4B3.18;SPBC428.18;SPAC20G4.07C;SPBC1734.14C;SPCC16C4.08C;SPBC1773.07C;SPAC20H4.01;SPBC1215.02C;SPAC20G8.07C;SPAC664.01C;SPBC29A10.06C;SPBC18E5.03C;SPCC1682.04;SPBC12C2.07C;SPAC31G5.13;SPCC1322.13;SPAC1F3.07C;SPAC4C5.04;SPAC1F12.07;SPBC3H7.09;SPCC4B3.08;SPBC16A3.11;SPCC553.07C;SPBC11C11.02;SPAC1F7.05;SPBC685.09;SPBC36.06C;SPBC4C3.05C
SPBC1289.12	Phenotypes (FYPO)	FYPO:0001044	abnormal acid phosphatase activity	Enriched	1.48514851485149 (6/404)	0.214216163583252 (11/5135)	0.00296832	SPAC144.03;SPAC6F12.10C;SPAC4D7.08C;SPBC405.01;SPCC1322.13;SPBC14F5.09C
SPAC1F3.07c	Phenotypes (FYPO)	FYPO:0001370	abnormal protein localization	Underrepresented	2.97029702970297 (12/404)	7.59493670886076 (390/5135)	0.00303718	SPBC1773.07C;SPBC1215.02C;SPAC20G8.07C;SPAC664.01C;SPBC18E5.03C;SPAC31G5.13;SPAC7D4.07C;SPCC4B3.08;SPBC16A3.11;SPBC685.09;SPBC36.06C;SPBC4C3.05C
SPAC18B11.02c	Phenotypes (FYPO)	FYPO:0000443	abnormal protein localization during vegetative growth	Underrepresented	2.72277227722772 (11/404)	7.14703018500487 (367/5135)	0.00418221	SPBC1773.07C;SPBC1215.02C;SPAC664.01C;SPBC18E5.03C;SPAC31G5.13;SPAC7D4.07C;SPCC4B3.08;SPBC16A3.11;SPBC685.09;SPBC36.06C;SPBC4C3.05C
SPAC29E6.06c	Phenotypes (FYPO)	FYPO:0000628	abnormal cellular process	Underrepresented	21.5346534653465 (87/404)	29.7370983446933 (1527/5135)	0.00509043	SPCC18.12C;SPBC30D10.15;SPBP8B7.17C;SPAC343.09;SPAC1B3.12C;SPAC56F8.04C;SPCC4B3.18;SPBC16A3.08C;SPAC16C9.06C;SPBC428.18;SPAC20G4.07C;SPBC1734.14C;SPCC16C4.08C;SPAC3G9.09C;SPBC36.07;SPBC27.08C;SPAC17H9.02;SPBC3B9.07C;SPBC342.06C;SPBC1718.03;SPBC1773.07C;SPAC6G10.07;SPAC20H4.01;SPAC18G6.07C;SPAC23G3.06;SPBC1215.02C;SPAC20G8.07C;SPBC36.04;SPAC664.01C;SPBC29A10.06C;SPBC1861.02;SPBC365.03C;SPAC140.02;…
SPAC4D7.09	Phenotypes (FYPO)	FYPO:0000114	cellular process phenotype	Underrepresented	25.4950495049505 (103/404)	33.8461538461538 (1738/5135)	0.00666125	SPCC18.12C;SPBC30D10.15;SPBP8B7.17C;SPAC343.09;SPAC1B3.12C;SPCC4B3.07;SPAC56F8.04C;SPCC4B3.18;SPBC16A3.08C;SPAC16C9.06C;SPBC6B1.08C;SPBC428.18;SPAC20G4.07C;SPBC1734.14C;SPCC16C4.08C;SPAC3G9.09C;SPBC36.07;SPBC27.08C;SPAC30.03C;SPAC17H9.02;SPBC3B9.07C;SPBC342.06C;SPBC1718.03;SPBC1773.07C;SPAC6G10.07;SPAC20H4.01;SPAC18G6.07C;SPAC23G3.06;SPBC1215.02C;SPAC20G8.07C;SPBC36.04;SPAC664.01C;SPBC29A10.06C;S…
SPBC800.08	Phenotypes (FYPO)	FYPO:0001363	abnormal metabolic process during vegetative growth	Underrepresented	3.46534653465347 (14/404)	7.86757546251217 (404/5135)	0.00803651	SPCC4B3.18;SPAC16C9.06C;SPAC17H9.02;SPBC342.06C;SPBC1215.02C;SPAC664.01C;SPAC140.02;SPAC31G5.13;SPBC336.10C;SPBC3H7.09;SPCC4B3.08;SPAC20H4.03C;SPBC16A3.11;SPBC685.09
SPCTRNASER.13	Protein Features		Protein copies per proliferating cell	Higher	35452.7	15769.3	1.26105e-43	SPAC12G12.06C;SPAC24H6.07;SPAC10F6.01C;SPAC56E4.03;SPAC57A10.12C;SPAC20G8.07C;SPAC18G6.07C;SPAC13G7.08C;SPAC17G8.06C;SPAC3F10.04;SPAC31G5.03;SPAC6G9.09C;SPAP7G5.04C;SPAPB18E9.01;SPAC1F7.13C;SPAC17D4.04;SPAC20G4.07C;SPAC22E12.07;SPAC5H10.12C;SPAC23C4.06C;SPAC30D11.12;SPAC22A12.16;SPAC4C5.01;SPAP27G11.13C;SPAC31G5.13;SPAC24C9.03;SPAC16E8.11C;SPAC8C9.10C;SPAP7G5.02C;SPAC683.02C;SPAC694.04C;SPAC25G10…
SPBC36.07	Protein Features		Protein Half Life (minutes)	Higher	1025.32	786.38	4.05399e-19	SPAC10F6.01C;SPAC56E4.03;SPAC57A10.12C;SPAC20G8.07C;SPAC18G6.07C;SPAC17G8.06C;SPAC3F10.04;SPAP7G5.04C;SPAC926.05C;SPAPB18E9.01;SPAC17D4.04;SPAC22E12.07;SPAC5H10.12C;SPAC30D11.12;SPAC22A12.14C;SPAC22A12.16;SPAC4C5.01;SPAP27G11.13C;SPAC31G5.13;SPAC24C9.03;SPAC16E8.11C;SPAC8C9.10C;SPAP7G5.02C;SPAC683.02C;SPAC694.04C;SPAC25G10.05C;SPAC30.03C;SPAC9E9.06C;SPAC144.03;SPAC26F1.12C;SPAC227.18;SPAC13A11.02…
SPAPB17E12.05	Protein Features		Serine	Lower	0.0786666	0.0907223	7.98811e-17	SPAC977.15;SPAC12G12.06C;SPAC24H6.07;SPAC1687.16C;SPAC10F6.01C;SPAC56E4.03;SPAC57A10.12C;SPAC20G8.07C;SPAC18G6.07C;SPAC13G7.08C;SPAC17G8.06C;SPAC3F10.04;SPAC2E1P3.05C;SPAC31G5.03;SPAC6G9.09C;SPAP7G5.04C;SPAC926.05C;SPAPB18E9.01;SPAC1F7.13C;SPAC17D4.04;SPAC20G4.07C;SPAC22E12.07;SPAC5H10.12C;SPAC23C4.06C;SPAC30D11.12;SPAC22A12.14C;SPAC22A12.16;SPAC4C5.01;SPAPB17E12.05;SPAP27G11.13C;SPAC664.04C;SPAC…
SPCC285.15c	Protein Features		Alanine	Higher	0.0720802	0.0625847	3.9574e-13	SPAC977.15;SPAC12G12.06C;SPAC24H6.07;SPAC1687.16C;SPAC10F6.01C;SPAC56E4.03;SPAC57A10.12C;SPAC20G8.07C;SPAC18G6.07C;SPAC13G7.08C;SPAC17G8.06C;SPAC3F10.04;SPAC2E1P3.05C;SPAC31G5.03;SPAC6G9.09C;SPAP7G5.04C;SPAC926.05C;SPAPB18E9.01;SPAC1F7.13C;SPAC17D4.04;SPAC20G4.07C;SPAC22E12.07;SPAC5H10.12C;SPAC23C4.06C;SPAC30D11.12;SPAC22A12.14C;SPAC22A12.16;SPAC4C5.01;SPAPB17E12.05;SPAP27G11.13C;SPAC664.04C;SPAC…
SPBC776.04	Protein Features		Valine	Higher	0.067564	0.060184	7.67055e-13	SPAC977.15;SPAC12G12.06C;SPAC24H6.07;SPAC1687.16C;SPAC10F6.01C;SPAC56E4.03;SPAC57A10.12C;SPAC20G8.07C;SPAC18G6.07C;SPAC13G7.08C;SPAC17G8.06C;SPAC3F10.04;SPAC2E1P3.05C;SPAC31G5.03;SPAC6G9.09C;SPAP7G5.04C;SPAC926.05C;SPAPB18E9.01;SPAC1F7.13C;SPAC17D4.04;SPAC20G4.07C;SPAC22E12.07;SPAC5H10.12C;SPAC23C4.06C;SPAC30D11.12;SPAC22A12.14C;SPAC22A12.16;SPAC4C5.01;SPAPB17E12.05;SPAP27G11.13C;SPAC664.04C;SPAC…
SPCC126.03	Protein Features		S.cerevisiae orthologs	Enriched	90.3465346534654 (365/404)	76.0662122687439 (3906/5135)	9.02936e-12	SPAPB17E12.13;SPAPB18E9.01;SPCC18.12C;SPAC3H5.05C;SPAC1786.02;SPAC16.03C;SPBC1703.05;SPAC23C4.15;SPAC959.03C;SPAC9E9.06C;SPBC776.04;SPBC30D10.15;SPAC17G8.08C;SPAC343.01C;SPBP8B7.17C;SPBC11B10.02C;SPAC343.09;SPAC1B3.12C;SPAC57A7.12;SPCC4B3.07;SPAC977.11;SPCC1753.04;SPCC74.05;SPAC1B1.03C;SPBC215.09C;SPCC285.15C;SPAC1A6.10;SPAC25B8.17;SPAC630.06C;SPAC1039.01;SPAC56F8.04C;SPBC1271.04C;SPCC4B3.18;SPBP…
SPCC4G3.14	Protein Features		Asparagine	Lower	0.0452266	0.0510301	6.97791e-11	SPAC977.15;SPAC12G12.06C;SPAC24H6.07;SPAC1687.16C;SPAC10F6.01C;SPAC56E4.03;SPAC57A10.12C;SPAC20G8.07C;SPAC18G6.07C;SPAC13G7.08C;SPAC17G8.06C;SPAC3F10.04;SPAC2E1P3.05C;SPAC31G5.03;SPAC6G9.09C;SPAP7G5.04C;SPAC926.05C;SPAPB18E9.01;SPAC1F7.13C;SPAC17D4.04;SPAC20G4.07C;SPAC22E12.07;SPAC5H10.12C;SPAC23C4.06C;SPAC30D11.12;SPAC22A12.14C;SPAC22A12.16;SPAC4C5.01;SPAPB17E12.05;SPAP27G11.13C;SPAC664.04C;SPAC…
SPAC22A12.14c	Protein Features		Glycine	Higher	0.0582506	0.0503332	8.71946e-11	SPAC977.15;SPAC12G12.06C;SPAC24H6.07;SPAC1687.16C;SPAC10F6.01C;SPAC56E4.03;SPAC57A10.12C;SPAC20G8.07C;SPAC18G6.07C;SPAC13G7.08C;SPAC17G8.06C;SPAC3F10.04;SPAC2E1P3.05C;SPAC31G5.03;SPAC6G9.09C;SPAP7G5.04C;SPAC926.05C;SPAPB18E9.01;SPAC1F7.13C;SPAC17D4.04;SPAC20G4.07C;SPAC22E12.07;SPAC5H10.12C;SPAC23C4.06C;SPAC30D11.12;SPAC22A12.14C;SPAC22A12.16;SPAC4C5.01;SPAPB17E12.05;SPAP27G11.13C;SPAC664.04C;SPAC…
SPAC7D4.07c	Protein Features		Protein copies per quiescent cell	Higher	15074.5	11001.8	2.29695e-08	SPAC12G12.06C;SPAC24H6.07;SPAC10F6.01C;SPAC56E4.03;SPAC57A10.12C;SPAC20G8.07C;SPAC18G6.07C;SPAC13G7.08C;SPAC17G8.06C;SPAC3F10.04;SPAC31G5.03;SPAC6G9.09C;SPAP7G5.04C;SPAPB18E9.01;SPAC1F7.13C;SPAC17D4.04;SPAC20G4.07C;SPAC22E12.07;SPAC30D11.12;SPAC22A12.16;SPAC4C5.01;SPAP27G11.13C;SPAC31G5.13;SPAC24C9.03;SPAC16E8.11C;SPAC8C9.10C;SPAP7G5.02C;SPAC694.04C;SPAC25G10.05C;SPAC9E9.06C;SPAC144.03;SPAC26F1.1…
SPBC1718.03	Protein Features		Homo sapiens orthologs	Enriched	77.970297029703 (315/404)	66.095423563778 (3394/5135)	6.043e-06	SPAPB17E12.13;SPAPB18E9.01;SPCC18.12C;SPAC3H5.05C;SPAC1786.02;SPBC1703.05;SPAC23C4.15;SPAC959.03C;SPAC9E9.06C;SPBC776.04;SPBC30D10.15;SPAC17G8.08C;SPAC343.09;SPAC1B3.12C;SPAC57A7.12;SPCC1753.04;SPCC74.05;SPAC1B1.03C;SPBC215.09C;SPCC285.15C;SPAC1A6.10;SPAC25B8.17;SPAC56F8.04C;SPBC1271.04C;SPCC4B3.18;SPBP8B7.21;SPCC364.03;SPAC24C9.03;SPBC577.12;SPBC8D2.16C;SPBC713.12;SPAC16C9.06C;SPBC23E6.05;SPBC6B…
SPAC10F6.03c	Protein Features		Phenylalanine	Lower	0.0417569	0.0464827	8.17852e-05	SPAC977.15;SPAC12G12.06C;SPAC24H6.07;SPAC1687.16C;SPAC10F6.01C;SPAC56E4.03;SPAC57A10.12C;SPAC20G8.07C;SPAC18G6.07C;SPAC13G7.08C;SPAC17G8.06C;SPAC3F10.04;SPAC2E1P3.05C;SPAC31G5.03;SPAC6G9.09C;SPAP7G5.04C;SPAC926.05C;SPAPB18E9.01;SPAC1F7.13C;SPAC17D4.04;SPAC20G4.07C;SPAC22E12.07;SPAC5H10.12C;SPAC23C4.06C;SPAC30D11.12;SPAC22A12.14C;SPAC22A12.16;SPAC4C5.01;SPAPB17E12.05;SPAP27G11.13C;SPAC664.04C;SPAC…
SPAC22E12.13c	Protein Features		Glutamine	Lower	0.0352323	0.0384964	0.00102226	SPAC977.15;SPAC12G12.06C;SPAC24H6.07;SPAC1687.16C;SPAC10F6.01C;SPAC56E4.03;SPAC57A10.12C;SPAC20G8.07C;SPAC18G6.07C;SPAC13G7.08C;SPAC17G8.06C;SPAC3F10.04;SPAC2E1P3.05C;SPAC31G5.03;SPAC6G9.09C;SPAP7G5.04C;SPAC926.05C;SPAPB18E9.01;SPAC1F7.13C;SPAC17D4.04;SPAC20G4.07C;SPAC22E12.07;SPAC5H10.12C;SPAC23C4.06C;SPAC30D11.12;SPAC22A12.14C;SPAC22A12.16;SPAC4C5.01;SPAPB17E12.05;SPAP27G11.13C;SPAC664.04C;SPAC…
SPAC22A12.16	Protein Features		Lysine	Higher	0.0739047	0.0674209	0.00102792	SPAC977.15;SPAC12G12.06C;SPAC24H6.07;SPAC1687.16C;SPAC10F6.01C;SPAC56E4.03;SPAC57A10.12C;SPAC20G8.07C;SPAC18G6.07C;SPAC13G7.08C;SPAC17G8.06C;SPAC3F10.04;SPAC2E1P3.05C;SPAC31G5.03;SPAC6G9.09C;SPAP7G5.04C;SPAC926.05C;SPAPB18E9.01;SPAC1F7.13C;SPAC17D4.04;SPAC20G4.07C;SPAC22E12.07;SPAC5H10.12C;SPAC23C4.06C;SPAC30D11.12;SPAC22A12.14C;SPAC22A12.16;SPAC4C5.01;SPAPB17E12.05;SPAP27G11.13C;SPAC664.04C;SPAC…
SPCC1322.15	Protein Localisations (ORFeome)		Cytosol	Enriched	22.2772277227723 (90/404)	12.5219084712756 (643/5135)	1.14644e-06	SPAPB17E12.13;SPCC74.05;SPBC215.09C;SPCC285.15C;SPCC364.03;SPBC16A3.08C;SPAC16C9.06C;SPBP4H10.14C;SPAC2F7.13C;SPAC29E6.06C;SPBC36.07;SPBC27.08C;SPBC2G2.12;SPBC342.02;SPBC1773.07C;SPBP8B7.06;SPBC11C11.07;SPBC2F12.14C;SPAC29A4.02C;SPBC1215.02C;SPCC1183.08C;SPBC25H2.05;SPBC839.16;SPAC4D7.09;SPAC10F6.01C;SPBC14F5.06;SPBC365.03C;SPAC10F6.10;SPAP7G5.04C;SPBC1773.10C;SPBC16H5.08C;SPCC1223.05C;SPCC1223.0…
SPAC10F6.10	Protein Localisations (ORFeome)		Nucleolus	Enriched	4.7029702970297 (19/404)	1.12950340798442 (58/5135)	3.49492e-06	SPCC18.12C;SPAC3H5.07;SPBC1718.03;SPAC140.02;SPAC607.03C;SPBC1711.05;SPBC776.01;SPBC1289.07C;SPAC4F8.03;SPCC1322.15;SPCC613.05C;SPAC683.02C;SPAP27G11.13C;SPAC1B3.13;SPAC1142.04;SPAC23A1.11;SPAC27F1.06C;SPAC8F11.04;SPBC2D10.10C
SPCC4B3.08	Transcript Features		mRNA copies per proliferating cell	Higher	18.2048	7.26629	4.49813e-52	SPAC977.15;SPAC12G12.06C;SPAC24H6.07;SPAC1687.16C;SPAC10F6.01C;SPAC56E4.03;SPAC57A10.12C;SPAC20G8.07C;SPAC18G6.07C;SPAC13G7.08C;SPAC17G8.06C;SPAC3F10.04;SPAC2E1P3.05C;SPAC31G5.03;SPAC6G9.09C;SPAP7G5.04C;SPAC926.05C;SPAPB18E9.01;SPAC1F7.13C;SPAC17D4.04;SPAC20G4.07C;SPAC22E12.07;SPAC5H10.12C;SPAC23C4.06C;SPAC30D11.12;SPAC22A12.14C;SPAC22A12.16;SPAC4C5.01;SPAPB17E12.05;SPAP27G11.13C;SPAC664.04C;SPAC…
SPBC2G2.12	Transcript Features		mRNA level (WT)	Higher	5103.13	2593.86	4.0274e-51	SPAC977.15;SPAC12G12.06C;SPAC24H6.07;SPAC1687.16C;SPAC10F6.01C;SPAC56E4.03;SPAC57A10.12C;SPAC20G8.07C;SPAC18G6.07C;SPAC13G7.08C;SPAC17G8.06C;SPAC3F10.04;SPAC2E1P3.05C;SPAC31G5.03;SPAC6G9.09C;SPAP7G5.04C;SPAC926.05C;SPAPB18E9.01;SPAC1F7.13C;SPAC17D4.04;SPAC20G4.07C;SPAC22E12.07;SPAC5H10.12C;SPAC23C4.06C;SPAC30D11.12;SPAC22A12.14C;SPAC22A12.16;SPAC4C5.01;SPAPB17E12.05;SPAP27G11.13C;SPAC664.04C;SPAC…
SPAC3G9.09c	Transcript Features		mRNA stabilities	Higher	53.1835	35.7052	2.79441e-42	SPAC12G12.06C;SPAC24H6.07;SPAC1687.16C;SPAC10F6.01C;SPAC56E4.03;SPAC57A10.12C;SPAC20G8.07C;SPAC18G6.07C;SPAC13G7.08C;SPAC17G8.06C;SPAC3F10.04;SPAC2E1P3.05C;SPAC31G5.03;SPAC6G9.09C;SPAP7G5.04C;SPAC926.05C;SPAPB18E9.01;SPAC1F7.13C;SPAC17D4.04;SPAC20G4.07C;SPAC5H10.12C;SPAC23C4.06C;SPAC30D11.12;SPAC22A12.14C;SPAC22A12.16;SPAC4C5.01;SPAPB17E12.05;SPAC664.04C;SPAC31G5.13;SPAC24C9.03;SPAC16E8.11C;SPAC8…
SPBC1861.08c	Transcript Features		Relative Pol II occupancy	Higher	1.76541	1.30236	2.00498e-18	SPAC977.15;SPAC12G12.06C;SPAC24H6.07;SPAC1687.16C;SPAC10F6.01C;SPAC56E4.03;SPAC57A10.12C;SPAC20G8.07C;SPAC18G6.07C;SPAC13G7.08C;SPAC17G8.06C;SPAC3F10.04;SPAC2E1P3.05C;SPAC31G5.03;SPAC6G9.09C;SPAP7G5.04C;SPAC926.05C;SPAPB18E9.01;SPAC1F7.13C;SPAC17D4.04;SPAC20G4.07C;SPAC22E12.07;SPAC5H10.12C;SPAC23C4.06C;SPAC30D11.12;SPAC22A12.14C;SPAC22A12.16;SPAC4C5.01;SPAPB17E12.05;SPAP27G11.13C;SPAC664.04C;SPAC…
SPAC13G6.02c	Transcript Features		Ribosome occupancy (%)	Higher	80.2647	76.9795	5.14837e-18	SPAC12G12.06C;SPAC24H6.07;SPAC1687.16C;SPAC10F6.01C;SPAC56E4.03;SPAC57A10.12C;SPAC20G8.07C;SPAC18G6.07C;SPAC13G7.08C;SPAC17G8.06C;SPAC3F10.04;SPAC2E1P3.05C;SPAC31G5.03;SPAC6G9.09C;SPAP7G5.04C;SPAC926.05C;SPAPB18E9.01;SPAC1F7.13C;SPAC17D4.04;SPAC20G4.07C;SPAC22E12.07;SPAC5H10.12C;SPAC23C4.06C;SPAC30D11.12;SPAC22A12.14C;SPAC22A12.16;SPAC4C5.01;SPAP27G11.13C;SPAC664.04C;SPAC31G5.13;SPAC24C9.03;SPAC1…
SPBC27.08c	Transcript Features		mRNA copies per quiescent cell	Higher	2.15956	1.40276	1.20144e-11	SPAC977.15;SPAC12G12.06C;SPAC24H6.07;SPAC1687.16C;SPAC10F6.01C;SPAC56E4.03;SPAC57A10.12C;SPAC20G8.07C;SPAC18G6.07C;SPAC13G7.08C;SPAC17G8.06C;SPAC3F10.04;SPAC2E1P3.05C;SPAC31G5.03;SPAC6G9.09C;SPAP7G5.04C;SPAC926.05C;SPAPB18E9.01;SPAC1F7.13C;SPAC17D4.04;SPAC20G4.07C;SPAC22E12.07;SPAC5H10.12C;SPAC23C4.06C;SPAC30D11.12;SPAC22A12.14C;SPAC22A12.16;SPAC4C5.01;SPAPB17E12.05;SPAP27G11.13C;SPAC664.04C;SPAC…
SPAC20H4.01	Transcript Features		Annotated transcript length	Lower	1783.94	2178.81	3.78876e-08	SPAC977.15;SPAC12G12.06C;SPAC24H6.07;SPAC1687.16C;SPAC10F6.01C;SPAC56E4.03;SPAC57A10.12C;SPAC20G8.07C;SPAC18G6.07C;SPAC13G7.08C;SPAC17G8.06C;SPAC3F10.04;SPAC2E1P3.05C;SPAC31G5.03;SPAC6G9.09C;SPAP7G5.04C;SPAC926.05C;SPAPB18E9.01;SPAC1F7.13C;SPAC17D4.04;SPAC20G4.07C;SPAC22E12.07;SPAC5H10.12C;SPAC23C4.06C;SPAC30D11.12;SPAC22A12.14C;SPAC22A12.16;SPAC4C5.01;SPAPB17E12.05;SPAP27G11.13C;SPAC664.04C;SPAC…
SPBP8B7.17c	Transcript Features		AugCAI	Higher	0.558943	0.507608	1.42211e-07	SPAC977.15;SPAC12G12.06C;SPAC24H6.07;SPAC1687.16C;SPAC10F6.01C;SPAC56E4.03;SPAC57A10.12C;SPAC20G8.07C;SPAC18G6.07C;SPAC13G7.08C;SPAC17G8.06C;SPAC3F10.04;SPAC2E1P3.05C;SPAC31G5.03;SPAC6G9.09C;SPAP7G5.04C;SPAC926.05C;SPAPB18E9.01;SPAC1F7.13C;SPAC17D4.04;SPAC20G4.07C;SPAC22E12.07;SPAC5H10.12C;SPAC23C4.06C;SPAC30D11.12;SPAC22A12.14C;SPAC22A12.16;SPAC4C5.01;SPAPB17E12.05;SPAP27G11.13C;SPAC664.04C;SPAC…
SPBC17A3.08	Transcript Features		Top 10% longest transcripts	Underrepresented	4.7029702970297 (19/404)	12.794547224927 (657/5135)	2.4142e-06	SPAC630.06C;SPAC23C4.06C;SPBC36.07;SPBC530.15C;SPBC839.16;SPAC22A12.10;SPAC6F12.10C;SPAC10F6.01C;SPAP7G5.04C;SPBP23A10.07;SPBC36.01C;SPBC23E6.04C;SPCC569.05C;SPAC17G6.11C;SPAC3F10.04;SPBPJ4664.02;SPBC36.02C;SPBC2G2.08;SPBC4C3.05C
SPAP7G5.02c	Transcript Features		Top 20% longest transcripts	Underrepresented	14.1089108910891 (57/404)	25.0048685491724 (1284/5135)	3.84317e-06	SPAC1786.02;SPBC776.04;SPAC1B1.03C;SPAC630.06C;SPAC1039.01;SPBP8B7.21;SPBC8D2.16C;SPAC16C9.06C;SPAC23C4.06C;SPBC36.07;SPAC17H9.02;SPAC6G10.07;SPBC530.15C;SPAC110.04C;SPBC1215.02C;SPBC17D11.05;SPBC839.16;SPAC22A12.10;SPAC6F12.10C;SPAC14C4.11;SPAC10F6.01C;SPBC1861.02;SPAP7G5.04C;SPBC1105.01;SPCC338.07C;SPCC1682.04;SPBC1709.02C;SPBP23A10.07;SPBC25H2.02;SPBC36.01C;SPAC11G7.06C;SPBC23E6.04C;SPBC405.01…
SPBC776.01	Transcript Features		Poly(A) tail length	Higher	31.1461	30.214	5.80204e-05	SPAC12G12.06C;SPAC24H6.07;SPAC1687.16C;SPAC10F6.01C;SPAC56E4.03;SPAC57A10.12C;SPAC20G8.07C;SPAC18G6.07C;SPAC17G8.06C;SPAC3F10.04;SPAC2E1P3.05C;SPAC31G5.03;SPAC6G9.09C;SPAP7G5.04C;SPAC926.05C;SPAPB18E9.01;SPAC1F7.13C;SPAC17D4.04;SPAC20G4.07C;SPAC22E12.07;SPAC23C4.06C;SPAC30D11.12;SPAC22A12.16;SPAC4C5.01;SPAP27G11.13C;SPAC664.04C;SPAC31G5.13;SPAC24C9.03;SPAC8C9.10C;SPAP7G5.02C;SPAC694.04C;SPAC25G10…
SPAC343.14c	Transcript Features		Ribosomal density (rb/kb)	Higher	4.79134	4.46524	0.000365237	SPAC12G12.06C;SPAC24H6.07;SPAC1687.16C;SPAC10F6.01C;SPAC56E4.03;SPAC57A10.12C;SPAC20G8.07C;SPAC18G6.07C;SPAC13G7.08C;SPAC17G8.06C;SPAC3F10.04;SPAC2E1P3.05C;SPAC31G5.03;SPAC6G9.09C;SPAP7G5.04C;SPAC926.05C;SPAPB18E9.01;SPAC1F7.13C;SPAC17D4.04;SPAC20G4.07C;SPAC22E12.07;SPAC5H10.12C;SPAC23C4.06C;SPAC30D11.12;SPAC22A12.14C;SPAC22A12.16;SPAC4C5.01;SPAP27G11.13C;SPAC664.04C;SPAC31G5.13;SPAC24C9.03;SPAC1…
SPAC1783.08c
SPAC1F8.08
SPAC18G6.14c
SPCC1223.14
SPBC12C2.06
SPAC607.03c
SPBC685.09
SPAC2E1P3.05c
SPBP23A10.07
SPAC26A3.17c
SPAPB8E5.09
SPBC409.13
SPBC18E5.06
SPAC23G3.12c
SPBPB8B6.06c
SPAC2F7.14c
SPCC1183.08c
SPAC6F12.13c
SPBC11C11.07
SPBC1709.07
SPBC3B9.01
SPAC630.06c
SPCC965.14c
SPBC8D2.09c
SPBC215.09c
SPCC4G3.18
SPAC31A2.02
SPAC56F8.05c
SPBC365.11
SPCC663.04
SPBC1703.05
SPBC1773.07c
SPAC3F10.12c
SPBC4C3.05c
SPBP8B7.06
SPAC30.03c
SPAC27E2.02
SPAC959.03c
SPBC409.15
SPAPB17E12.13
SPBP4H10.14c
SPAPB1E7.10
SPAC22A12.13
SPAC17H9.13c
SPBC27.01c
SPAC17G8.06c
SPBC4C3.03
SPCC4B3.11c
SPBC1734.14c
SPCC1795.05c
SPAC1420.02c
SPAC31G5.13
SPAC323.01c
SPBC29A3.12
SPCC663.13c
SPBC365.04c
SPAC1A6.10
SPAC3G9.06
SPBC19G7.17
SPBC16E9.05
SPAC23G3.04
SPAC20H4.03c
SPBC428.18
SPAC4F8.14c
SPAC144.03
SPAC6G9.02c
SPAC11G7.06c
SPCC645.14c
SPATRNAVAL.03
SPBC25H2.05
SPAC227.05
SPCC1682.09c
SPBC14F5.06
SPAC31G5.03
SPAC23A1.11
SPATRNAILE.02
SPAC1782.10c
SPBC1604.06c
SPBC16G5.17
SPAC23C4.06c
SPCC737.06c
SPBC36.01c
SPBTRNALEU.06
SPCC777.06c
SPAC31G5.01
SPAC23G3.06
SPCC1259.03
SPCC16A11.10c
SPAC9E9.13
SPBC16H5.08c
SPAC959.07
SPBC839.16
SPBC3D6.06c
SPBC106.17c
SPCC1281.03c
SPAC9E9.06c
SPAC17D4.04
SPCTRNAGLY.12
SPCC1840.08c
SPBC713.12
SPAC343.09
SPAC56E4.03
SPBC1709.02c
SPAC23A1.03
SPBC3E7.07c
SPAC26F1.05
SPBC29A10.01
SPAC2F7.13c
SPAC16C9.06c
SPCC1223.08c
SPSNORNA.33
SPBC17G9.09
SPBC2G2.08
SPBC32H8.05
SPBC18E5.03c
SPBC21C3.15c
SPBC2F12.14c
SPBC609.04
SPBC16H5.10c
SPBC577.02
SPBC18H10.04c
SPCP1E11.11
SPCC584.01c
SPATRNASER.03
SPBC21C3.08c
SPAC11D3.04c
SPAC57A10.03
SPAPB24D3.06c
SPCC364.03
SPBC36.06c
SPAC13G7.06
SPAC6G9.09c
SPBC18H10.12c
SPBC428.15
SPBC19C2.07
SPCC338.11c
SPBC29A3.11c
SPBC409.08
SPBC1271.09
SPBC2D10.11c
SPBC11B10.02c
SPAC8C9.10c
SPAC227.18
SPAC1F12.04c
SPAC16.03c
SPAPB18E9.01
SPBC1198.02
SPAC13G7.08c
SPAC56F8.04c
SPAP27G11.13c
SPCC1450.04
SPSNORNA.06
SPBC12C2.07c
SPBC3H7.14
SPAC2E1P5.03
SPBC582.09
SPBC17D11.05
SPBPJ4664.02
SPAC1B3.12c
SPBC8D2.16c
SPBC19C7.07c
SPBC23E6.04c
SPCC5E4.05c
SPCC1682.04
SPAC664.01c
SPBC16D10.06
SPCC569.04
SPBC16H5.15
SPBC25H2.02
SPAC926.08c
SPCC4B3.07
SPAC1039.01
SPAC6G10.07
SPCC290.02
SPAC27D7.07c
SPCC553.07c
SPSNORNA.54
SPBC6B1.08c
SPCC24B10.18
SPCC613.06
SPAC890.04c
SPBC30D10.15
SPBC16H5.02
SPCTRNAVAL.10
SPBC1271.04c
SPBC18E5.01
SPAC8E11.07c
SPSNORNA.10
SPNCRNA.128
SPBC1215.02c
SPAC56F8.09
SPBC365.03c
SPBC3B9.05

## Sheet: cluster 3
S3_4 Table. Cluster 3, functional enrichments.
Data were grouped into clusters as described. Gene group enrichments were determined for each cluster using AnGeLi.
cluster_3	Category_Name	External_ID	GeneSet_Name	over_represented/under_represented	List_Frequency	Background_Frequency	Corrected_pvalue	Genes_In_Common/Interacting_Gene_Pair
SPAC513.07	GO Biological Process	GO:0033212	iron assimilation	Enriched	13.1578947368421 (5/38)	0.136319376825706 (7/5135)	1.33922e-06	SPAC1F7.07C;SPAC1F7.08;SPBC1683.09C;SPBC4F6.09;SPAC1F8.03C
SPAC1F7.08	GO Biological Process	GO:0006879	cellular iron ion homeostasis	Enriched	13.1578947368421 (5/38)	0.370009737098345 (19/5135)	0.000154494	SPAC1F7.07C;SPAC1F7.08;SPBC1683.09C;SPBC4F6.09;SPAC1F8.03C
SPBPB2B2.05	GO Biological Process	GO:0033215	iron assimilation by reduction and transport	Enriched	7.89473684210526 (3/38)	0.0584225900681597 (3/5135)	0.000281688	SPAC1F7.07C;SPAC1F7.08;SPBC1683.09C
SPBC24C6.04	GO Biological Process	GO:0055072	iron ion homeostasis	Enriched	13.1578947368421 (5/38)	0.428432327166504 (22/5135)	0.000281688	SPAC1F7.07C;SPAC1F7.08;SPBC1683.09C;SPBC4F6.09;SPAC1F8.03C
SPBP8B7.16c	GO Biological Process	GO:0006090	pyruvate metabolic process	Enriched	13.1578947368421 (5/38)	0.603700097370984 (31/5135)	0.00126988	SPBC1815.01;SPAC1F8.07C;SPAC26F1.06;SPCC13B11.01;SPAC4H3.10C
SPAC1F7.07c	GO Biological Process	GO:0006007	glucose catabolic process	Enriched	10.5263157894737 (4/38)	0.350535540408958 (18/5135)	0.00270391	SPBC1815.01;SPAC26F1.06;SPCC13B11.01;SPAC4H3.10C
SPAC6G10.12c	GO Biological Process	GO:0019752	carboxylic acid metabolic process	Enriched	28.9473684210526 (11/38)	5.92015579357351 (304/5135)	0.00270391	SPBC1815.01;SPAC23H4.06;SPAC1F8.07C;SPBPB2B2.05;SPAC26F1.06;SPBC24C6.04;SPCC13B11.01;SPBC14F5.05C;SPCC1827.03C;SPAC4H3.10C;SPBC428.11
SPAC26F1.06	GO Biological Process	GO:0046916	cellular transition metal ion homeostasis	Enriched	13.1578947368421 (5/38)	0.740019474196689 (38/5135)	0.00270391	SPAC1F7.07C;SPAC1F7.08;SPBC1683.09C;SPBC4F6.09;SPAC1F8.03C
SPAC977.14c	GO Biological Process	GO:0006082	organic acid metabolic process	Enriched	28.9473684210526 (11/38)	6.01752677702045 (309/5135)	0.00288901	SPBC1815.01;SPAC23H4.06;SPAC1F8.07C;SPBPB2B2.05;SPAC26F1.06;SPBC24C6.04;SPCC13B11.01;SPBC14F5.05C;SPCC1827.03C;SPAC4H3.10C;SPBC428.11
SPCC18B5.01c	GO Biological Process	GO:0043436	oxoacid metabolic process	Enriched	28.9473684210526 (11/38)	5.99805258033106 (308/5135)	0.00288901	SPBC1815.01;SPAC23H4.06;SPAC1F8.07C;SPBPB2B2.05;SPAC26F1.06;SPBC24C6.04;SPCC13B11.01;SPBC14F5.05C;SPCC1827.03C;SPAC4H3.10C;SPBC428.11
SPAC4H3.10c	GO Biological Process	GO:0055076	transition metal ion homeostasis	Enriched	13.1578947368421 (5/38)	0.798442064264849 (41/5135)	0.00331728	SPAC1F7.07C;SPAC1F7.08;SPBC1683.09C;SPBC4F6.09;SPAC1F8.03C
SPBC428.11	GO Biological Process	GO:0019320	hexose catabolic process	Enriched	10.5263157894737 (4/38)	0.428432327166504 (22/5135)	0.00497471	SPBC1815.01;SPAC26F1.06;SPCC13B11.01;SPAC4H3.10C
SPBP4G3.02	GO Biological Process	GO:0019318	hexose metabolic process	Enriched	13.1578947368421 (5/38)	0.895813047711782 (46/5135)	0.0052505	SPBC1815.01;SPAC26F1.06;SPAC8E11.10;SPCC13B11.01;SPAC4H3.10C
SPBC8E4.12c	GO Biological Process	GO:0006734	NADH metabolic process	Enriched	10.5263157894737 (4/38)	0.486854917234664 (25/5135)	0.00759106	SPBC1815.01;SPAC26F1.06;SPCC13B11.01;SPAC4H3.10C
SPAC8E11.10	GO Biological Process	GO:0044724	single-organism carbohydrate catabolic process	Enriched	13.1578947368421 (5/38)	1.0126582278481 (52/5135)	0.00813287	SPBC1815.01;SPAC821.09;SPAC26F1.06;SPCC13B11.01;SPAC4H3.10C
SPAC1F8.07c	GO Biological Process	GO:0005996	monosaccharide metabolic process	Enriched	13.1578947368421 (5/38)	1.05160662122687 (54/5135)	0.00949385	SPBC1815.01;SPAC26F1.06;SPAC8E11.10;SPCC13B11.01;SPAC4H3.10C
SPBC1347.02	Gene Expression		Highly expressed genes	Enriched	50 (19/38)	8.89970788704966 (457/5135)	4.15794e-07	SPAC926.04C;SPBC1815.01;SPAC23H4.06;SPAC1F8.07C;SPBC8E4.01C;SPAC1B3.03C;SPAC26F1.06;SPBC24C6.04;SPCC13B11.01;SPBC1105.05;SPBC14F5.05C;SPCC1827.03C;SPAC750.01;SPAC4H3.10C;SPAC5H10.03;SPAC977.14C;SPCC1739.13;SPBC1734.11;SPCC18B5.01C
SPBC1683.09c	Gene Expression		Amino acid metabolism module	Enriched	26.3157894736842 (10/38)	2.64849074975657 (136/5135)	3.33963e-05	SPAC1039.02;SPAC212.11;SPAC1B3.03C;SPBPB2B2.05;SPAC8E11.10;SPBC24C6.04;SPCC663.08C;SPAC513.07;SPBC1734.11;SPCC18B5.01C
SPAC821.09	Gene Expression		Repressed gar2 mutant	Enriched	15.7894736842105 (6/38)	1.14897760467381 (59/5135)	0.00175701	SPBC1815.01;SPAC26F1.06;SPAC8E11.10;SPBC24C6.04;SPBC14F5.05C;SPBC428.11
SPBC8E4.01c	Gene Expression		Cell cycle periodically expressed	Enriched	36.8421052631579 (14/38)	9.67867575462512 (497/5135)	0.00242233	SPAC926.04C;SPAC1F7.07C;SPAC1039.02;SPBPB2B2.01;SPAC1F7.08;SPBP8B7.16C;SPBPB2B2.05;SPAC821.09;SPBC1105.05;SPCC1827.03C;SPBC4F6.09;SPBP4G3.02;SPAC6G10.12C;SPCC18B5.01C
SPAC212.11	Gene Expression		Caffeine and Rapamycin induced	Enriched	26.3157894736842 (10/38)	5.60856864654333 (288/5135)	0.00778131	SPAC1039.02;SPBPB2B2.01;SPAC1B3.03C;SPBPB2B2.05;SPCC663.08C;SPBP4G3.02;SPAC513.07;SPAC977.14C;SPCC18B5.01C;SPAC1F8.03C
SPAC23H4.06	Gene Expression		Induced pat1.114 mutant	Enriched	28.9473684210526 (11/38)	7.14703018500487 (367/5135)	0.00994136	SPAC926.04C;SPAC1F7.07C;SPAC1F7.08;SPBC1347.02;SPBC1683.09C;SPAC1B3.03C;SPBC24C6.04;SPCC13B11.01;SPBC4F6.09;SPBC1734.11;SPAC1F8.03C
SPAC750.01	Gene Features		Intron-containing genes	Underrepresented	10.5263157894737 (4/38)	48.8412852969815 (2508/5135)	0.000405347	SPBP8B7.16C;SPCC1827.03C;SPBC24C6.04;SPAC1F8.07C
SPCC13B11.01	Gene Features		Intron-less genes	Enriched	89.4736842105263 (34/38)	51.1587147030185 (2627/5135)	0.000405347	SPAC926.04C;SPAC1F7.07C;SPAC1039.02;SPBPB2B2.01;SPAC1F7.08;SPBC1347.02;SPBC1815.01;SPAC23H4.06;SPAC212.11;SPBC1683.09C;SPBC8E4.01C;SPAC1B3.03C;SPBPB2B2.05;SPAC821.09;SPAC26F1.06;SPAC8E11.10;SPCC13B11.01;SPBC1105.05;SPBC14F5.05C;SPBC4F6.09;SPCC663.08C;SPAC750.01;SPAC5H10.03;SPAC4H3.10C;SPBP4G3.02;SPAC513.07;SPAC977.14C;SPCC1739.13;SPBC8E4.12C;SPBC428.11;SPAC6G10.12C;SPBC1734.11;SPCC18B5.01C;SPAC1F…
SPAC1039.02	Protein Features		Glycine	Higher	0.0733096	0.0507895	5.56254e-06	SPAC926.04C;SPAC212.11;SPAC26F1.06;SPAC513.07;SPAC6G10.12C;SPAC1039.02;SPAC8E11.10;SPAC750.01;SPAC977.14C;SPAC1F7.08;SPAC1F8.07C;SPAC1F8.03C;SPAC5H10.03;SPAC23H4.06;SPAC821.09;SPAC4H3.10C;SPAC1F7.07C;SPAC1B3.03C;SPBC24C6.04;SPBC1105.05;SPBC8E4.12C;SPBPB2B2.01;SPBC1683.09C;SPBC428.11;SPBC4F6.09;SPBP8B7.16C;SPBC1734.11;SPBC14F5.05C;SPBP4G3.02;SPBPB2B2.05;SPBC8E4.01C;SPBC1815.01;SPBC1347.02;SPCC1739…
SPBC4F6.09	Protein Features		Protein copies per quiescent cell	Higher	63392.8	10921.3	1.70694e-05	SPAC926.04C;SPAC26F1.06;SPAC513.07;SPAC1039.02;SPAC8E11.10;SPAC750.01;SPAC977.14C;SPAC1F8.07C;SPAC5H10.03;SPAC23H4.06;SPAC821.09;SPAC4H3.10C;SPAC1B3.03C;SPBC24C6.04;SPBPB2B2.01;SPBC428.11;SPBP8B7.16C;SPBC1734.11;SPBC14F5.05C;SPBP4G3.02;SPBPB2B2.05;SPBC8E4.01C;SPBC1815.01;SPBC1347.02;SPCC1739.13;SPCC13B11.01;SPCC1827.03C;SPCC18B5.01C
SPAC1B3.03c	Protein Features		Protein copies per proliferating cell	Higher	163211	16449.1	2.52125e-05	SPAC926.04C;SPAC26F1.06;SPAC513.07;SPAC1039.02;SPAC8E11.10;SPAC750.01;SPAC977.14C;SPAC1F7.08;SPAC1F8.07C;SPAC5H10.03;SPAC23H4.06;SPAC821.09;SPAC4H3.10C;SPAC1F7.07C;SPAC1B3.03C;SPBC24C6.04;SPBC428.11;SPBC4F6.09;SPBP8B7.16C;SPBC1734.11;SPBC14F5.05C;SPBP4G3.02;SPBC8E4.01C;SPBC1815.01;SPBC1347.02;SPCC1739.13;SPCC13B11.01;SPCC663.08C;SPCC1827.03C;SPCC18B5.01C
SPAC926.04c	Protein Features		Nitrogen content	Lower	1.31362	1.36613	0.00126988	SPAC926.04C;SPAC212.11;SPAC26F1.06;SPAC513.07;SPAC6G10.12C;SPAC1039.02;SPAC8E11.10;SPAC750.01;SPAC977.14C;SPAC1F7.08;SPAC1F8.07C;SPAC1F8.03C;SPAC5H10.03;SPAC23H4.06;SPAC821.09;SPAC4H3.10C;SPAC1F7.07C;SPAC1B3.03C;SPBC24C6.04;SPBC1105.05;SPBC8E4.12C;SPBPB2B2.01;SPBC1683.09C;SPBC428.11;SPBC4F6.09;SPBP8B7.16C;SPBC1734.11;SPBC14F5.05C;SPBP4G3.02;SPBPB2B2.05;SPBC8E4.01C;SPBC1815.01;SPBC1347.02;SPCC1739…
SPCC1827.03c	Protein Features		Alanine	Higher	0.0776541	0.0632252	0.00634592	SPAC926.04C;SPAC212.11;SPAC26F1.06;SPAC513.07;SPAC6G10.12C;SPAC1039.02;SPAC8E11.10;SPAC750.01;SPAC977.14C;SPAC1F7.08;SPAC1F8.07C;SPAC1F8.03C;SPAC5H10.03;SPAC23H4.06;SPAC821.09;SPAC4H3.10C;SPAC1F7.07C;SPAC1B3.03C;SPBC24C6.04;SPBC1105.05;SPBC8E4.12C;SPBPB2B2.01;SPBC1683.09C;SPBC428.11;SPBC4F6.09;SPBP8B7.16C;SPBC1734.11;SPBC14F5.05C;SPBP4G3.02;SPBPB2B2.05;SPBC8E4.01C;SPBC1815.01;SPBC1347.02;SPCC1739…
SPCC1739.13	Protein Features		Leucine	Lower	0.0824547	0.0967513	0.00813287	SPAC926.04C;SPAC212.11;SPAC26F1.06;SPAC513.07;SPAC6G10.12C;SPAC1039.02;SPAC8E11.10;SPAC750.01;SPAC977.14C;SPAC1F7.08;SPAC1F8.07C;SPAC1F8.03C;SPAC5H10.03;SPAC23H4.06;SPAC821.09;SPAC4H3.10C;SPAC1F7.07C;SPAC1B3.03C;SPBC24C6.04;SPBC1105.05;SPBC8E4.12C;SPBPB2B2.01;SPBC1683.09C;SPBC428.11;SPBC4F6.09;SPBP8B7.16C;SPBC1734.11;SPBC14F5.05C;SPBP4G3.02;SPBPB2B2.05;SPBC8E4.01C;SPBC1815.01;SPBC1347.02;SPCC1739…
SPBC1734.11	Transcript Features		mRNA level (WT)	Higher	7167.55	2770.8	1.91953e-05	SPAC926.04C;SPAC26F1.06;SPAC513.07;SPAC6G10.12C;SPAC1039.02;SPAC8E11.10;SPAC977.14C;SPAC1F7.08;SPAC1F8.07C;SPAC1F8.03C;SPAC5H10.03;SPAC23H4.06;SPAC821.09;SPAC4H3.10C;SPAC1F7.07C;SPAC1B3.03C;SPBC24C6.04;SPBC1105.05;SPBPB2B2.01;SPBC1683.09C;SPBC428.11;SPBC4F6.09;SPBP8B7.16C;SPBC1734.11;SPBC14F5.05C;SPBP4G3.02;SPBPB2B2.05;SPBC8E4.01C;SPBC1815.01;SPBC1347.02;SPCC1739.13;SPCC13B11.01;SPCC663.08C;SPCC1…
SPCC663.08c	Transcript Features		mRNA copies per proliferating cell	Higher	74.5737	7.63681	0.000122554	SPAC926.04C;SPAC212.11;SPAC26F1.06;SPAC513.07;SPAC6G10.12C;SPAC1039.02;SPAC8E11.10;SPAC750.01;SPAC977.14C;SPAC1F7.08;SPAC1F8.07C;SPAC1F8.03C;SPAC5H10.03;SPAC23H4.06;SPAC821.09;SPAC4H3.10C;SPAC1F7.07C;SPAC1B3.03C;SPBC24C6.04;SPBC1105.05;SPBC8E4.12C;SPBPB2B2.01;SPBC1683.09C;SPBC428.11;SPBC4F6.09;SPBP8B7.16C;SPBC1734.11;SPBC14F5.05C;SPBP4G3.02;SPBPB2B2.05;SPBC8E4.01C;SPBC1815.01;SPBC1347.02;SPCC1739…
SPBC1105.05	Transcript Features		Ribosome occupancy (%)	Higher	84.2015	77.2587	0.00177763	SPAC926.04C;SPAC26F1.06;SPAC513.07;SPAC6G10.12C;SPAC1039.02;SPAC8E11.10;SPAC977.14C;SPAC1F8.07C;SPAC5H10.03;SPAC23H4.06;SPAC821.09;SPAC1F7.07C;SPAC1B3.03C;SPBC24C6.04;SPBC1105.05;SPBC4F6.09;SPBP8B7.16C;SPBC14F5.05C;SPBP4G3.02;SPBPB2B2.05;SPBC8E4.01C;SPBC1815.01;SPBC1347.02;SPCC1739.13;SPCC13B11.01;SPCC663.08C;SPCC1827.03C;SPCC18B5.01C
SPBC14F5.05c	Transcript Features		mRNA copies per quiescent cell	Higher	9.33216	1.40364	0.00379979	SPAC926.04C;SPAC212.11;SPAC26F1.06;SPAC513.07;SPAC6G10.12C;SPAC1039.02;SPAC8E11.10;SPAC750.01;SPAC977.14C;SPAC1F7.08;SPAC1F8.07C;SPAC1F8.03C;SPAC5H10.03;SPAC23H4.06;SPAC821.09;SPAC4H3.10C;SPAC1F7.07C;SPAC1B3.03C;SPBC24C6.04;SPBC1105.05;SPBC8E4.12C;SPBPB2B2.01;SPBC1683.09C;SPBC428.11;SPBC4F6.09;SPBP8B7.16C;SPBC1734.11;SPBC14F5.05C;SPBP4G3.02;SPBPB2B2.05;SPBC8E4.01C;SPBC1815.01;SPBC1347.02;SPCC1739…
SPAC5H10.03
SPAC1F8.03c
SPBC1815.01
SPBPB2B2.01

## Sheet: cluster 4
S3_ 5 Table. Cluster 4, functional enrichments.
Data were grouped into clusters as described. Gene group enrichments were determined for each cluster using AnGeLi.
cluster_4	Category_Name	External_ID	GeneSet_Name	over_represented/under_represented	List_Frequency	Background_Frequency	Corrected_pvalue	Genes_In_Common/Interacting_Gene_Pair
SPAC22F8.05	Gene Expression		Stress module	Enriched	76.6666666666667 (23/30)	2.62901655306719 (135/5135)	8.70799e-28	SPBC365.12C;SPBC725.03;SPAC22A12.17C;SPAC139.05;SPCC16A11.15C;SPAC22F8.05;SPBC16D10.08C;SPAC27D7.09C;SPAC19D5.01;SPAC513.02;SPBC21C3.19;SPCC757.07C;SPCC1020.10;SPACUNK4.17;SPCC1223.03C;SPBC24C6.09C;SPCC1322.08;SPBC1105.14;SPBC11C11.06C;SPBC20F10.03;SPAC23C11.06C;SPBC660.05;SPCC757.03C
SPAC13G7.02c	Gene Expression		Atf1 activated	Enriched	60 (18/30)	1.28529698149951 (66/5135)	2.17238e-24	SPBC365.12C;SPBC725.03;SPAC22A12.17C;SPAC139.05;SPCC16A11.15C;SPAC22F8.05;SPAC27D7.09C;SPAC19D5.01;SPAC513.02;SPBC21C3.19;SPCC757.07C;SPACUNK4.17;SPBC24C6.09C;SPCC1223.03C;SPBC11C11.06C;SPAC23C11.06C;SPBC660.05;SPCC757.03C
SPCC320.03	Gene Expression		Core Environmental Stress Response induced	Enriched	86.6666666666667 (26/30)	10.4381694255112 (536/5135)	8.159e-19	SPBC365.12C;SPBC725.03;SPAC22A12.17C;SPAC139.05;SPCC16A11.15C;SPAC22F8.05;SPBC16D10.08C;SPAC27D7.09C;SPAC19D5.01;SPAC32A11.02C;SPAC513.02;SPCC576.17C;SPBC21C3.19;SPCC757.07C;SPCC1020.10;SPACUNK4.17;SPCC1223.03C;SPBC24C6.09C;SPCC1322.08;SPBC1105.14;SPBC11C11.06C;SPBC20F10.03;SPAC23C11.06C;SPBC660.05;SPCC757.03C;SPCC320.03
SPBC365.12c	Gene Expression		Oxidative Stess Cluster 4	Enriched	73.3333333333333 (22/30)	8.00389483933788 (411/5135)	2.68443e-15	SPBC365.12C;SPBC725.03;SPAC22A12.17C;SPAC139.05;SPCC16A11.15C;SPAC22F8.05;SPAC27D7.09C;SPAC19D5.01;SPAC513.02;SPCC576.17C;SPBC21C3.19;SPCC1020.10;SPACUNK4.17;SPBC24C6.09C;SPCC1223.03C;SPCC1322.08;SPBC1105.14;SPBC11C11.06C;SPBC20F10.03;SPAC23C11.06C;SPBC660.05;SPCC757.03C
SPBC11C11.06c	Gene Expression		Late meiotic genes	Enriched	46.6666666666667 (14/30)	2.64849074975657 (136/5135)	6.58622e-12	SPBC725.03;SPAC22A12.17C;SPAC139.05;SPCC16A11.15C;SPAC32A11.02C;SPAC513.02;SPCC757.07C;SPBC21C3.19;SPACUNK4.17;SPBC24C6.09C;SPBC1105.14;SPBC20F10.03;SPAC23C11.06C;SPCC757.03C
SPAC22A12.17c	Gene Expression		Sporulation module	Enriched	43.3333333333333 (13/30)	3.58325219084713 (184/5135)	9.414e-09	SPBC365.12C;SPBC725.03;SPAC139.05;SPCC16A11.15C;SPBC16D10.08C;SPAC32A11.02C;SPAC513.02;SPACUNK4.17;SPBC24C6.09C;SPBC1105.14;SPBC20F10.03;SPAC23C11.06C;SPCC757.03C
SPCC1020.10	Gene Expression		Induced Amo1 mutant	Enriched	26.6666666666667 (8/30)	0.740019474196689 (38/5135)	2.33159e-08	SPAC22F8.05;SPAC27D7.09C;SPCC757.07C;SPBC21C3.19;SPACUNK4.17;SPBC11C11.06C;SPAC23C11.06C;SPAC13G7.02C
SPBC20F10.03	Gene Expression		Induced Dbr1 deletion	Enriched	36.6666666666667 (11/30)	2.41480038948393 (124/5135)	3.68251e-08	SPBC365.12C;SPBC725.03;SPAC139.05;SPAC27D7.09C;SPCPB16A4.07;SPAC513.02;SPCC576.17C;SPBC21C3.19;SPBC24C6.09C;SPAC13G7.02C;SPBC660.05
SPCC1322.08	Gene Expression		Caffeine and Rapamycin induced	Enriched	46.6666666666667 (14/30)	5.60856864654333 (288/5135)	1.22221e-07	SPBC365.12C;SPBC725.03;SPAC22A12.17C;SPCC16A11.15C;SPAC22F8.05;SPBC16D10.08C;SPAC27D7.09C;SPAC513.02;SPCC757.07C;SPBC21C3.19;SPBC24C6.09C;SPBC11C11.06C;SPAC13G7.02C;SPCC757.03C
SPCC757.03c	Gene Expression		Reproduction module	Enriched	40 (12/30)	5.74488802336904 (295/5135)	2.68691e-05	SPBC365.12C;SPBC725.03;SPAC2H10.01;SPCC16A11.15C;SPAC22F8.05;SPAC513.02;SPCC757.07C;SPBC24C6.09C;SPBC1105.14;SPAC977.17;SPAC23C11.06C;SPCC757.03C
SPAC27D7.09c	Gene Expression		Induced usp102 mutant	Enriched	20 (6/30)	0.876338851022395 (45/5135)	0.00011289	SPAC27D7.09C;SPAC32A11.02C;SPBC21C3.19;SPACUNK4.17;SPAC23C11.06C;SPAC13G7.02C
SPACUNK4.17	Gene Expression		Induced pan3 mutant	Enriched	16.6666666666667 (5/30)	0.584225900681597 (30/5135)	0.000392604	SPAC22F8.05;SPAC27D7.09C;SPCC757.07C;SPBC21C3.19;SPBC11C11.06C
SPBC660.05	Gene Expression		Induced erl1 mutant	Enriched	13.3333333333333 (4/30)	0.428432327166504 (22/5135)	0.00377798	SPAC19D5.01;SPAC32A11.02C;SPBC24C6.09C;SPCC757.03C
SPBC1105.14	Protein Features		Leucine	Lower	0.0760908	0.0967663	0.00467	SPAC32A11.02C;SPAC2H10.01;SPAC139.05;SPAC22A12.17C;SPAC13G7.02C;SPAC977.17;SPAC23C11.06C;SPAC27D7.09C;SPAC22F8.05;SPACUNK4.17;SPAC19D5.01;SPAC513.02;SPBC365.12C;SPBC16D10.08C;SPBC1105.14;SPBC660.05;SPBC24C6.09C;SPBC21C3.19;SPBC725.03;SPBC20F10.03;SPBC11C11.06C;SPCC1020.10;SPCC1322.08;SPCPB16A4.07;SPCC576.17C;SPCC757.03C;SPCC320.03;SPCC16A11.15C;SPCC757.07C;SPCC1223.03C
SPBC725.03	Protein Features		Homo sapiens orthologs	Underrepresented	26.6666666666667 (8/30)	66.095423563778 (3394/5135)	0.00768226	SPAC139.05;SPBC16D10.08C;SPAC19D5.01;SPCC757.07C;SPCC1223.03C;SPBC20F10.03;SPAC977.17;SPAC13G7.02C
SPBC16D10.08c
SPCC1223.03c
SPAC139.05
SPAC19D5.01
SPAC32A11.02c
SPBC24C6.09c
SPCC16A11.15c
SPCC576.17c
SPAC2H10.01
SPAC23C11.06c
SPAC977.17
SPBC21C3.19
SPAC513.02
SPCC757.07c
SPCPB16A4.07

## Sheet: cluster 5
S3_6 Table. Cluster 5, functional enrichments.
Data were grouped into clusters as described. Gene group enrichments were determined for each cluster using AnGeLi.
cluster_5	Category_Name	External_ID	GeneSet_Name	over_represented/under_represented	List_Frequency	Background_Frequency	Corrected_pvalue	Genes_In_Common/Interacting_Gene_Pair
SPAC2E1P3.01	GO Biological Process	GO:0022613	ribonucleoprotein complex biogenesis	Underrepresented	0.569259962049336 (3/527)	7.20545277507303 (370/5135)	4.44e-11	SPBC16C6.03C;SPAC19E9.01C;SPBC1711.17
SPAC32A11.03c	GO Biological Process	GO:0042254	ribosome biogenesis	Underrepresented	0.379506641366224 (2/527)	6.15384615384615 (316/5135)	6.86058e-10	SPBC16C6.03C;SPAC19E9.01C
SPAC4F10.16c	GO Biological Process	GO:0034660	ncRNA metabolic process	Underrepresented	0.759013282732448 (4/527)	6.27069133398247 (322/5135)	3.47747e-08	SPBC29A10.09C;SPAC27E2.06C;SPCC576.06C;SPCC4B3.01
SPBC11B10.07c	GO Biological Process	GO:0034470	ncRNA processing	Underrepresented	0.379506641366224 (2/527)	5.25803310613437 (270/5135)	5.40038e-08	SPBC29A10.09C;SPCC4B3.01
SPAC1556.03	GO Biological Process	GO:0010467	gene expression	Underrepresented	15.3700189753321 (81/527)	26.1927945472249 (1345/5135)	2.88379e-07	SPBC16A3.18;SPBC21B10.03C;SPBC1826.01C;SPBC947.10;SPBC947.08C;SPAC23G3.09;SPBC3B8.11;SPCC188.13C;SPBC29A10.09C;SPAC16C9.04C;SPAC32A11.03C;SPAC23A1.18C;SPAC23C11.08;SPAC11D3.07C;SPBC119.02;SPAC27E2.06C;SPCC1739.03;SPAC17A2.09C;SPBC28F2.12;SPAC23C4.12;SPAC6F12.02;SPAC1142.08;SPBC12C2.10C;SPAC31G5.18C;SPAC1610.02C;SPCC74.03C;SPBP23A10.14C;SPBC1289.02C;SPAC3C7.04;SPBC9B6.04C;SPCC285.11;SPBC1734.16C;S…
SPAC144.17c	GO Biological Process	GO:0002181	cytoplasmic translation	Underrepresented	0.379506641366224 (2/527)	4.79065238558909 (246/5135)	4.41161e-07	SPCC74.03C;SPAC57A7.08
SPAC29E6.05c	GO Biological Process	GO:0006396	RNA processing	Underrepresented	2.84629981024668 (15/527)	9.01655306718598 (463/5135)	1.54169e-06	SPBC21B10.03C;SPCC188.13C;SPBC29A10.09C;SPAC16C9.04C;SPBC1289.02C;SPAC22G7.10;SPCC10H11.02;SPBC530.14C;SPBC15D4.11C;SPBC13E7.03C;SPCC736.11;SPBC1711.17;SPBP8B7.15C;SPCC4B3.01;SPAC821.04C
SPAC14C4.07	GO Biological Process	GO:0042773	ATP synthesis coupled electron transport	Enriched	2.46679316888046 (13/527)	0.408958130477118 (21/5135)	3.3485e-06	SPBC29A3.18;SPCC737.02C;SPAC3A11.07;SPBP23A10.16;SPAC1556.02C;SPBC16H5.06;SPCC338.10C;SPCC613.10;SPCC330.12C;SPBP4H10.08;SPAC1782.07;SPBC16C6.08C;SPAC1296.02
SPCC16A11.08	GO Biological Process	GO:0042775	mitochondrial ATP synthesis coupled electron transport	Enriched	2.46679316888046 (13/527)	0.408958130477118 (21/5135)	3.3485e-06	SPBC29A3.18;SPCC737.02C;SPAC3A11.07;SPBP23A10.16;SPAC1556.02C;SPBC16H5.06;SPCC338.10C;SPCC613.10;SPCC330.12C;SPBP4H10.08;SPAC1782.07;SPBC16C6.08C;SPAC1296.02
SPCC1919.06c	GO Biological Process	GO:0006914	autophagy	Enriched	3.60531309297913 (19/527)	0.856864654333009 (44/5135)	4.08706e-06	SPAC4F10.07C;SPAC20G8.10C;SPAC25A8.02;SPAC1D4.03C;SPAC1687.09;SPAC2G11.13;SPCC1682.11C;SPAC823.16C;SPAC10F6.11C;SPBC26H8.04C;SPCC16A11.08;SPAC589.07C;SPAC6F6.12;SPBC14F5.11C;SPBC15D4.07C;SPBC4B4.10C;SPAC22H12.05C;SPBC6B1.05C;SPAC227.04
SPAC17C9.06	GO Biological Process	GO:0009199	ribonucleoside triphosphate metabolic process	Enriched	3.79506641366224 (20/527)	0.954235637779941 (49/5135)	5.09145e-06	SPBC29A3.18;SPCC1840.06;SPCC737.02C;SPAC3A11.07;SPBP23A10.16;SPBC1604.07;SPAC222.12C;SPAC1556.02C;SPBC16H5.06;SPCC338.10C;SPAC227.14;SPAC806.07;SPCC613.10;SPCC330.12C;SPBP4H10.08;SPBC29A10.13;SPAC1782.07;SPBC16C6.08C;SPAC1296.02;SPAC14C4.14
SPAC3A12.08	GO Biological Process	GO:0009205	purine ribonucleoside triphosphate metabolic process	Enriched	3.60531309297913 (19/527)	0.895813047711782 (46/5135)	8.3455e-06	SPBC29A3.18;SPCC1840.06;SPCC737.02C;SPAC3A11.07;SPBP23A10.16;SPBC1604.07;SPAC222.12C;SPAC1556.02C;SPBC16H5.06;SPCC338.10C;SPAC806.07;SPCC613.10;SPCC330.12C;SPBP4H10.08;SPBC29A10.13;SPAC1782.07;SPBC16C6.08C;SPAC1296.02;SPAC14C4.14
SPAC13F5.04c	GO Biological Process	GO:0006119	oxidative phosphorylation	Enriched	2.46679316888046 (13/527)	0.447906523855891 (23/5135)	1.16033e-05	SPBC29A3.18;SPCC737.02C;SPAC3A11.07;SPBP23A10.16;SPAC1556.02C;SPBC16H5.06;SPCC338.10C;SPCC613.10;SPCC330.12C;SPBP4H10.08;SPAC1782.07;SPBC16C6.08C;SPAC1296.02
SPBC3H7.13	GO Biological Process	GO:0046034	ATP metabolic process	Enriched	3.41555977229602 (18/527)	0.837390457643622 (43/5135)	1.33547e-05	SPBC29A3.18;SPCC1840.06;SPCC737.02C;SPAC3A11.07;SPBP23A10.16;SPBC1604.07;SPAC222.12C;SPAC1556.02C;SPBC16H5.06;SPCC338.10C;SPCC613.10;SPCC330.12C;SPBP4H10.08;SPBC29A10.13;SPAC1782.07;SPBC16C6.08C;SPAC1296.02;SPAC14C4.14
SPAC17A2.09c	GO Biological Process	GO:0009144	purine nucleoside triphosphate metabolic process	Enriched	3.60531309297913 (19/527)	0.934761441090555 (48/5135)	1.64591e-05	SPBC29A3.18;SPCC1840.06;SPCC737.02C;SPAC3A11.07;SPBP23A10.16;SPBC1604.07;SPAC222.12C;SPAC1556.02C;SPBC16H5.06;SPCC338.10C;SPAC806.07;SPCC613.10;SPCC330.12C;SPBP4H10.08;SPBC29A10.13;SPAC1782.07;SPBC16C6.08C;SPAC1296.02;SPAC14C4.14
SPBC21C3.11	GO Biological Process	GO:0072665	protein localization to vacuole	Enriched	3.79506641366224 (20/527)	1.07108081791626 (55/5135)	3.83466e-05	SPAC4F10.07C;SPAC20G8.10C;SPAC25A8.02;SPAC1D4.03C;SPAC1687.09;SPAC19A8.05C;SPAP27G11.05C;SPAC823.16C;SPCC16A11.08;SPAC589.07C;SPAC11H11.01;SPAC458.05;SPAC6F6.12;SPBC1734.08;SPBC15D4.07C;SPBC4B4.10C;SPAC17G6.05C;SPAC3H1.14;SPBC6B1.05C;SPAC227.04
SPBC3E7.04c	GO Biological Process	GO:0022904	respiratory electron transport chain	Enriched	2.46679316888046 (13/527)	0.486854917234664 (25/5135)	3.86331e-05	SPBC29A3.18;SPCC737.02C;SPAC3A11.07;SPBP23A10.16;SPAC1556.02C;SPBC16H5.06;SPCC338.10C;SPCC613.10;SPCC330.12C;SPBP4H10.08;SPAC1782.07;SPBC16C6.08C;SPAC1296.02
SPBP8B7.23	GO Biological Process	GO:0009141	nucleoside triphosphate metabolic process	Enriched	3.79506641366224 (20/527)	1.09055501460565 (56/5135)	5.13361e-05	SPBC29A3.18;SPCC1840.06;SPCC737.02C;SPAC3A11.07;SPBP23A10.16;SPBC1604.07;SPAC222.12C;SPAC1556.02C;SPBC16H5.06;SPCC338.10C;SPAC227.14;SPAC806.07;SPCC613.10;SPCC330.12C;SPBP4H10.08;SPBC29A10.13;SPAC1782.07;SPBC16C6.08C;SPAC1296.02;SPAC14C4.14
SPBC31E1.04	GO Biological Process	GO:0016236	macroautophagy	Enriched	2.46679316888046 (13/527)	0.506329113924051 (26/5135)	6.07529e-05	SPAC4F10.07C;SPAC20G8.10C;SPAC25A8.02;SPCC1682.11C;SPAC823.16C;SPAC10F6.11C;SPBC26H8.04C;SPAC589.07C;SPBC15D4.07C;SPBC4B4.10C;SPAC22H12.05C;SPBC6B1.05C;SPAC227.04
SPBC18H10.09	GO Biological Process	GO:0022900	electron transport chain	Enriched	2.46679316888046 (13/527)	0.506329113924051 (26/5135)	6.07529e-05	SPBC29A3.18;SPCC737.02C;SPAC3A11.07;SPBP23A10.16;SPAC1556.02C;SPBC16H5.06;SPCC338.10C;SPCC613.10;SPCC330.12C;SPBP4H10.08;SPAC1782.07;SPBC16C6.08C;SPAC1296.02
SPBC646.13	GO Biological Process	GO:0006412	translation	Underrepresented	2.46679316888046 (13/527)	7.30282375851996 (375/5135)	8.99269e-05	SPAC23A1.18C;SPAC27E2.06C;SPAC1610.02C;SPCC74.03C;SPBC9B6.04C;SPCC576.06C;SPBC1709.09;SPAC57A7.08;SPBC1271.15C;SPBC9B6.06;SPBC83.06C;SPAC4F8.06;SPAP19A11.05C
SPAC823.09c	GO Biological Process	GO:0006623	protein targeting to vacuole	Enriched	3.60531309297913 (19/527)	1.05160662122687 (54/5135)	0.000107201	SPAC4F10.07C;SPAC20G8.10C;SPAC25A8.02;SPAC1D4.03C;SPAC1687.09;SPAC19A8.05C;SPAP27G11.05C;SPAC823.16C;SPCC16A11.08;SPAC589.07C;SPAC11H11.01;SPAC6F6.12;SPBC1734.08;SPBC15D4.07C;SPBC4B4.10C;SPAC17G6.05C;SPAC3H1.14;SPBC6B1.05C;SPAC227.04
SPAC1687.09	GO Biological Process	GO:0072666	establishment of protein localization to vacuole	Enriched	3.60531309297913 (19/527)	1.05160662122687 (54/5135)	0.000107201	SPAC4F10.07C;SPAC20G8.10C;SPAC25A8.02;SPAC1D4.03C;SPAC1687.09;SPAC19A8.05C;SPAP27G11.05C;SPAC823.16C;SPCC16A11.08;SPAC589.07C;SPAC11H11.01;SPAC6F6.12;SPBC1734.08;SPBC15D4.07C;SPBC4B4.10C;SPAC17G6.05C;SPAC3H1.14;SPBC6B1.05C;SPAC227.04
SPBC29A3.03c	GO Biological Process	GO:0015980	energy derivation by oxidation of organic compounds	Enriched	3.60531309297913 (19/527)	1.07108081791626 (55/5135)	0.00014269	SPAC4F8.07C;SPBC29A3.18;SPBC776.15C;SPAC32A11.03C;SPCC737.02C;SPAC3A11.07;SPBP23A10.16;SPAC1556.02C;SPBC16H5.06;SPCC338.10C;SPCC613.10;SPCC330.12C;SPBP4H10.08;SPCC18.18C;SPAC1782.07;SPCC1739.09C;SPBC16C6.08C;SPBC32F12.10;SPAC1296.02
SPAC3G6.09c	GO Biological Process	GO:0090304	nucleic acid metabolic process	Underrepresented	16.3187855787476 (86/527)	24.5569620253165 (1261/5135)	0.00025305	SPBC21B10.03C;SPAC6B12.02C;SPBC1826.01C;SPAPB24D3.04C;SPBC713.06;SPBC947.08C;SPCC965.05C;SPAC23G3.09;SPAC688.10;SPBC3B8.11;SPBC12D12.09;SPCC188.13C;SPBC29A10.09C;SPAC16C9.04C;SPAC32A11.03C;SPAC23C11.08;SPAC11D3.07C;SPAC27E2.06C;SPCC1739.03;SPBC776.02C;SPBC28F2.12;SPAC6G9.16C;SPAC23C4.12;SPAC6F12.02;SPAC1142.08;SPBC12C2.10C;SPAC1687.22C;SPAC31G5.18C;SPCC74.03C;SPBC30D10.08;SPBP23A10.14C;SPBC1289.0…
SPCC1322.16	GO Biological Process	GO:0016070	RNA metabolic process	Underrepresented	12.3339658444023 (65/527)	19.8442064264849 (1019/5135)	0.000282135	SPBC21B10.03C;SPBC1826.01C;SPBC947.08C;SPAC23G3.09;SPBC3B8.11;SPCC188.13C;SPBC29A10.09C;SPAC16C9.04C;SPAC32A11.03C;SPAC23C11.08;SPAC11D3.07C;SPAC27E2.06C;SPCC1739.03;SPBC28F2.12;SPAC23C4.12;SPAC6F12.02;SPAC1142.08;SPBC12C2.10C;SPAC1687.22C;SPAC31G5.18C;SPCC74.03C;SPBP23A10.14C;SPBC1289.02C;SPAC3C7.04;SPBC1734.16C;SPAC4D7.10C;SPAC22G7.10;SPCC576.06C;SPACUNK12.02C;SPBC17D11.02C;SPAC1002.05C;SPCC10H…
SPBC211.07c	GO Biological Process	GO:0007034	vacuolar transport	Enriched	5.31309297912714 (28/527)	2.14216163583252 (110/5135)	0.000444234	SPAC4F10.07C;SPCC737.09C;SPAC20G8.10C;SPAC25A8.02;SPAC1D4.03C;SPCC162.06C;SPAC1687.09;SPAC2G11.13;SPAC19A8.05C;SPAP27G11.05C;SPAC823.16C;SPCC16A11.08;SPAC589.07C;SPBC119.07;SPAC17A2.06C;SPBC1105.10;SPAC11H11.01;SPAC13F5.04C;SPAC6F6.12;SPBC1734.08;SPBC15D4.07C;SPBC4B4.10C;SPAC17G6.05C;SPBC31E1.04;SPAC3H1.14;SPAC6F12.03C;SPBC6B1.05C;SPAC227.04
SPCC622.12c	GO Biological Process	GO:0055114	oxidation-reduction process	Enriched	3.98481973434535 (21/527)	1.38266796494645 (71/5135)	0.000580441	SPAC4F8.07C;SPBC29A3.18;SPBC776.15C;SPAC32A11.03C;SPCC737.02C;SPAC3A11.07;SPBP23A10.16;SPAC1556.02C;SPBC16H5.06;SPCC338.10C;SPAC20G8.04C;SPCC613.10;SPCC330.12C;SPBP4H10.08;SPCC18.18C;SPAC1782.07;SPCC1739.09C;SPCC576.01C;SPBC16C6.08C;SPBC32F12.10;SPAC1296.02
SPAP8A3.12c	GO Biological Process	GO:0009056	catabolic process	Enriched	16.1290322580645 (85/527)	10.0681596884129 (517/5135)	0.000670217	SPAC4F10.07C;SPAC4F8.07C;SPBC1198.06C;SPAC20G8.02;SPAPB24D3.04C;SPAC20G8.10C;SPBC947.10;SPAC12B10.13;SPBP18G5.02;SPAC513.06C;SPAC343.04C;SPAC16C9.04C;SPAC25A8.02;SPAC11G7.02;SPBC776.15C;SPAC32A11.03C;SPAC1D4.03C;SPCC162.06C;SPBC119.02;SPAC227.11C;SPBP35G2.12;SPAC1687.09;SPCC1450.09C;SPAC2G11.13;SPCC1682.11C;SPBC12C2.12C;SPAC23C4.12;SPAC19A8.05C;SPAC823.16C;SPAC1687.22C;SPAC30D11.01C;SPAC14C4.10C;…
SPAC1B9.02c	GO Biological Process	GO:0016567	protein ubiquitination	Enriched	5.50284629981025 (29/527)	2.27848101265823 (117/5135)	0.000809387	SPBC15C4.06C;SPBC947.10;SPCC126.07C;SPAC16C9.04C;SPAC11G7.02;SPBC119.02;SPBC14F5.07;SPCC4G3.12C;SPAC17A2.06C;SPCC330.01C;SPBC17D11.02C;SPAC2F3.16;SPAC1805.15C;SPBC16E9.11C;SPBC1604.21C;SPAC17G8.10C;SPBC16G5.03;SPBC56F2.01;SPAC19A8.10;SPBP8B7.23;SPBC36B7.05C;SPBC29A3.03C;SPBP8B7.15C;SPBC32F12.07C;SPAC29E6.01;SPAC57A10.05C;SPBC211.07C;SPAC11E3.05;SPAC12B10.01C
SPBC14C8.01c	GO Biological Process	GO:0032258	CVT pathway	Enriched	1.89753320683112 (10/527)	0.389483933787731 (20/5135)	0.000997416	SPAC4F10.07C;SPAC20G8.10C;SPAC25A8.02;SPAC1687.09;SPCC16A11.08;SPAC6F6.12;SPBC15D4.07C;SPBC4B4.10C;SPBC6B1.05C;SPAC227.04
SPBC4B4.10c	GO Biological Process	GO:0006122	mitochondrial electron transport, ubiquinol to cytochrome c	Enriched	1.32827324478178 (7/527)	0.194741966893866 (10/5135)	0.00121451	SPBC29A3.18;SPCC737.02C;SPBC16H5.06;SPCC613.10;SPBP4H10.08;SPAC1782.07;SPBC16C6.08C
SPAC821.04c	GO Biological Process	GO:0045333	cellular respiration	Enriched	3.03605313092979 (16/527)	0.934761441090555 (48/5135)	0.00136075	SPBC29A3.18;SPBC776.15C;SPCC737.02C;SPAC3A11.07;SPBP23A10.16;SPAC1556.02C;SPBC16H5.06;SPCC338.10C;SPCC613.10;SPCC330.12C;SPBP4H10.08;SPCC18.18C;SPAC1782.07;SPCC1739.09C;SPBC16C6.08C;SPAC1296.02
SPBC776.15c	GO Biological Process	GO:0006163	purine nucleotide metabolic process	Enriched	4.7438330170778 (25/527)	1.96689386562804 (101/5135)	0.0021858	SPAC4F8.07C;SPBC29A3.18;SPAPB24D3.04C;SPCC1840.06;SPAC32A11.03C;SPCC737.02C;SPAC3A11.07;SPBP23A10.16;SPBC1604.07;SPAC222.12C;SPAC1556.02C;SPBC16H5.06;SPAC24H6.04;SPCC338.10C;SPAC806.07;SPCC613.10;SPCC330.12C;SPCC306.09C;SPBP4H10.08;SPBC29A10.13;SPAC1782.07;SPBC16C6.08C;SPAC1296.02;SPBC19C7.03;SPAC14C4.14
SPAC14C4.10c	GO Biological Process	GO:0009150	purine ribonucleotide metabolic process	Enriched	4.55407969639469 (24/527)	1.85004868549172 (95/5135)	0.00218809	SPAC4F8.07C;SPBC29A3.18;SPCC1840.06;SPAC32A11.03C;SPCC737.02C;SPAC3A11.07;SPBP23A10.16;SPBC1604.07;SPAC222.12C;SPAC1556.02C;SPBC16H5.06;SPAC24H6.04;SPCC338.10C;SPAC806.07;SPCC613.10;SPCC330.12C;SPCC306.09C;SPBP4H10.08;SPBC29A10.13;SPAC1782.07;SPBC16C6.08C;SPAC1296.02;SPBC19C7.03;SPAC14C4.14
SPCC622.08c	GO Biological Process	GO:0044248	cellular catabolic process	Enriched	14.6110056925996 (77/527)	9.17234664070107 (471/5135)	0.00225767	SPAC4F10.07C;SPBC1198.06C;SPAC20G8.02;SPAPB24D3.04C;SPAC20G8.10C;SPBC947.10;SPAC12B10.13;SPAC343.04C;SPAC16C9.04C;SPAC25A8.02;SPAC11G7.02;SPBC776.15C;SPAC32A11.03C;SPAC1D4.03C;SPCC162.06C;SPBC119.02;SPAC227.11C;SPBP35G2.12;SPAC1687.09;SPCC1450.09C;SPAC2G11.13;SPCC1682.11C;SPBC12C2.12C;SPAC23C4.12;SPAC19A8.05C;SPAC823.16C;SPAC1687.22C;SPAC30D11.01C;SPAC14C4.10C;SPAC10F6.11C;SPBC26H8.04C;SPAC1002.0…
SPBC21B10.12	GO Biological Process	GO:0009059	macromolecule biosynthetic process	Underrepresented	14.6110056925996 (77/527)	21.5384615384615 (1106/5135)	0.00275283	SPAC6B12.02C;SPBC1826.01C;SPBC713.06;SPAC18B11.05;SPBC947.08C;SPAC23G3.09;SPCC63.04;SPAC688.10;SPBC3B8.11;SPBC12D12.09;SPCC188.13C;SPBC29A10.09C;SPAC16C9.04C;SPAC32A11.03C;SPAC23A1.18C;SPAC23C11.08;SPAC11D3.07C;SPBC119.02;SPAC27E2.06C;SPAC144.10C;SPCC1739.03;SPBC28F2.12;SPAC23C4.12;SPAC6F12.02;SPAC1142.08;SPBC12C2.10C;SPAC31G5.18C;SPAC1610.02C;SPCC74.03C;SPBP23A10.14C;SPAC3F10.07C;SPAC3C7.04;SPBC…
SPCC162.07	GO Biological Process	GO:0010906	regulation of glucose metabolic process	Enriched	1.32827324478178 (7/527)	0.214216163583252 (11/5135)	0.00275283	SPAC12B10.13;SPAC343.04C;SPAC32A11.03C;SPAC6F12.02;SPAC3H1.14;SPBC29A3.03C;SPBC106.13
SPAC227.14	GO Biological Process	GO:0009058	biosynthetic process	Underrepresented	22.7703984819734 (120/527)	30.6329113924051 (1573/5135)	0.0027656	SPAC1296.01C;SPAC6B12.02C;SPBC1718.04;SPBC1826.01C;SPBC713.06;SPAC20G8.10C;SPAC12B10.13;SPAC18B11.05;SPAC3H8.06;SPBP18G5.02;SPBC947.08C;SPCC1840.06;SPAC23G3.09;SPCC63.04;SPAC688.10;SPBC3B8.11;SPBC12D12.09;SPCC188.13C;SPAC343.04C;SPBC29A10.09C;SPAC16C9.04C;SPCC1281.06C;SPAC32A11.03C;SPAC29E6.05C;SPAC23A1.18C;SPAC1952.13;SPAC23C11.08;SPAC11D3.07C;SPBC119.02;SPAC27E2.06C;SPAC144.10C;SPCC1739.03;SPBC…
SPBP8B7.07c	GO Biological Process	GO:1901576	organic substance biosynthetic process	Underrepresented	22.3908918406072 (118/527)	30.2044790652386 (1551/5135)	0.00309524	SPAC1296.01C;SPAC6B12.02C;SPBC1718.04;SPBC1826.01C;SPBC713.06;SPAC20G8.10C;SPAC12B10.13;SPAC18B11.05;SPAC3H8.06;SPBP18G5.02;SPBC947.08C;SPCC1840.06;SPAC23G3.09;SPCC63.04;SPAC688.10;SPBC3B8.11;SPBC12D12.09;SPCC188.13C;SPAC343.04C;SPBC29A10.09C;SPAC16C9.04C;SPCC1281.06C;SPAC32A11.03C;SPAC29E6.05C;SPAC23A1.18C;SPAC1952.13;SPAC23C11.08;SPAC11D3.07C;SPBC119.02;SPAC27E2.06C;SPAC144.10C;SPCC1739.03;SPBC…
SPAC3F10.19	GO Biological Process	GO:0034645	cellular macromolecule biosynthetic process	Underrepresented	14.6110056925996 (77/527)	21.4800389483934 (1103/5135)	0.00320762	SPAC6B12.02C;SPBC1826.01C;SPBC713.06;SPAC18B11.05;SPBC947.08C;SPAC23G3.09;SPCC63.04;SPAC688.10;SPBC3B8.11;SPBC12D12.09;SPCC188.13C;SPBC29A10.09C;SPAC16C9.04C;SPAC32A11.03C;SPAC23A1.18C;SPAC23C11.08;SPAC11D3.07C;SPBC119.02;SPAC27E2.06C;SPAC144.10C;SPCC1739.03;SPBC28F2.12;SPAC23C4.12;SPAC6F12.02;SPAC1142.08;SPBC12C2.10C;SPAC31G5.18C;SPAC1610.02C;SPCC74.03C;SPBP23A10.14C;SPAC3F10.07C;SPAC3C7.04;SPBC…
SPAC10F6.11c	GO Biological Process	GO:0009126	purine nucleoside monophosphate metabolic process	Enriched	3.98481973434535 (21/527)	1.55793573515093 (80/5135)	0.00340328	SPAC4F8.07C;SPBC29A3.18;SPCC1840.06;SPAC32A11.03C;SPCC737.02C;SPAC3A11.07;SPBP23A10.16;SPBC1604.07;SPAC222.12C;SPAC1556.02C;SPBC16H5.06;SPAC24H6.04;SPCC338.10C;SPCC613.10;SPCC330.12C;SPBP4H10.08;SPBC29A10.13;SPAC1782.07;SPBC16C6.08C;SPAC1296.02;SPAC14C4.14
SPAC144.04c	GO Biological Process	GO:0009167	purine ribonucleoside monophosphate metabolic process	Enriched	3.98481973434535 (21/527)	1.55793573515093 (80/5135)	0.00340328	SPAC4F8.07C;SPBC29A3.18;SPCC1840.06;SPAC32A11.03C;SPCC737.02C;SPAC3A11.07;SPBP23A10.16;SPBC1604.07;SPAC222.12C;SPAC1556.02C;SPBC16H5.06;SPAC24H6.04;SPCC338.10C;SPCC613.10;SPCC330.12C;SPBP4H10.08;SPBC29A10.13;SPAC1782.07;SPBC16C6.08C;SPAC1296.02;SPAC14C4.14
SPAC23A1.17	GO Biological Process	GO:0044249	cellular biosynthetic process	Underrepresented	22.2011385199241 (117/527)	29.8928919182084 (1535/5135)	0.0034864	SPAC1296.01C;SPAC6B12.02C;SPBC1718.04;SPBC1826.01C;SPBC713.06;SPAC20G8.10C;SPAC12B10.13;SPAC18B11.05;SPAC3H8.06;SPBP18G5.02;SPBC947.08C;SPCC1840.06;SPAC23G3.09;SPCC63.04;SPAC688.10;SPBC3B8.11;SPBC12D12.09;SPCC188.13C;SPAC343.04C;SPBC29A10.09C;SPAC16C9.04C;SPCC1281.06C;SPAC32A11.03C;SPAC29E6.05C;SPAC23A1.18C;SPAC1952.13;SPAC23C11.08;SPAC11D3.07C;SPBC119.02;SPAC27E2.06C;SPAC144.10C;SPCC1739.03;SPBC…
SPBC56F2.01	GO Biological Process	GO:0009605	response to external stimulus	Enriched	3.98481973434535 (21/527)	1.57740993184031 (81/5135)	0.00369536	SPAC4F10.07C;SPAC20G8.10C;SPAC25A8.02;SPCC1682.11C;SPAC6F12.02;SPAC823.16C;SPAC10F6.11C;SPBC26H8.04C;SPCC74.03C;SPAC589.07C;SPBC646.13;SPBC15D4.07C;SPBC4B4.10C;SPAC22H12.05C;SPBC30D10.10C;SPAC26F1.10C;SPCC1919.03C;SPBC6B1.05C;SPBC725.11C;SPBC19C7.03;SPAC227.04
SPAC3H5.09c	GO Biological Process	GO:0009991	response to extracellular stimulus	Enriched	3.98481973434535 (21/527)	1.57740993184031 (81/5135)	0.00369536	SPAC4F10.07C;SPAC20G8.10C;SPAC25A8.02;SPCC1682.11C;SPAC6F12.02;SPAC823.16C;SPAC10F6.11C;SPBC26H8.04C;SPCC74.03C;SPAC589.07C;SPBC646.13;SPBC15D4.07C;SPBC4B4.10C;SPAC22H12.05C;SPBC30D10.10C;SPAC26F1.10C;SPCC1919.03C;SPBC6B1.05C;SPBC725.11C;SPBC19C7.03;SPAC227.04
SPCC285.06c	GO Biological Process	GO:0031667	response to nutrient levels	Enriched	3.98481973434535 (21/527)	1.57740993184031 (81/5135)	0.00369536	SPAC4F10.07C;SPAC20G8.10C;SPAC25A8.02;SPCC1682.11C;SPAC6F12.02;SPAC823.16C;SPAC10F6.11C;SPBC26H8.04C;SPCC74.03C;SPAC589.07C;SPBC646.13;SPBC15D4.07C;SPBC4B4.10C;SPAC22H12.05C;SPBC30D10.10C;SPAC26F1.10C;SPCC1919.03C;SPBC6B1.05C;SPBC725.11C;SPBC19C7.03;SPAC227.04
SPAC23E2.02	GO Biological Process	GO:0031668	cellular response to extracellular stimulus	Enriched	3.98481973434535 (21/527)	1.57740993184031 (81/5135)	0.00369536	SPAC4F10.07C;SPAC20G8.10C;SPAC25A8.02;SPCC1682.11C;SPAC6F12.02;SPAC823.16C;SPAC10F6.11C;SPBC26H8.04C;SPCC74.03C;SPAC589.07C;SPBC646.13;SPBC15D4.07C;SPBC4B4.10C;SPAC22H12.05C;SPBC30D10.10C;SPAC26F1.10C;SPCC1919.03C;SPBC6B1.05C;SPBC725.11C;SPBC19C7.03;SPAC227.04
SPBC19F5.01c	GO Biological Process	GO:0031669	cellular response to nutrient levels	Enriched	3.98481973434535 (21/527)	1.57740993184031 (81/5135)	0.00369536	SPAC4F10.07C;SPAC20G8.10C;SPAC25A8.02;SPCC1682.11C;SPAC6F12.02;SPAC823.16C;SPAC10F6.11C;SPBC26H8.04C;SPCC74.03C;SPAC589.07C;SPBC646.13;SPBC15D4.07C;SPBC4B4.10C;SPAC22H12.05C;SPBC30D10.10C;SPAC26F1.10C;SPCC1919.03C;SPBC6B1.05C;SPBC725.11C;SPBC19C7.03;SPAC227.04
SPBC947.08c	GO Biological Process	GO:0070647	protein modification by small protein conjugation or removal	Enriched	7.21062618595825 (38/527)	3.68062317429406 (189/5135)	0.00369536	SPBC15C4.06C;SPBC947.10;SPCC126.07C;SPAC16C9.04C;SPAC11G7.02;SPBC119.02;SPCC330.11;SPAC24C9.14;SPBC14F5.07;SPCC4G3.12C;SPAC17A2.06C;SPBC1703.12;SPCC330.01C;SPCC188.08C;SPBC17D11.02C;SPBC19C2.04C;SPAC2F3.16;SPAC1805.15C;SPBC16E9.11C;SPBC713.02C;SPBC1604.21C;SPBC609.03;SPAC17G8.10C;SPBC16G5.03;SPBC56F2.01;SPAC19A8.10;SPBP8B7.23;SPBC36B7.05C;SPBC29A3.03C;SPBC25B2.11;SPBP8B7.15C;SPBC32F12.07C;SPAC29E…
SPBC6B1.09c	GO Biological Process	GO:0071496	cellular response to external stimulus	Enriched	3.98481973434535 (21/527)	1.57740993184031 (81/5135)	0.00369536	SPAC4F10.07C;SPAC20G8.10C;SPAC25A8.02;SPCC1682.11C;SPAC6F12.02;SPAC823.16C;SPAC10F6.11C;SPBC26H8.04C;SPCC74.03C;SPAC589.07C;SPBC646.13;SPBC15D4.07C;SPBC4B4.10C;SPAC22H12.05C;SPBC30D10.10C;SPAC26F1.10C;SPCC1919.03C;SPBC6B1.05C;SPBC725.11C;SPBC19C7.03;SPAC227.04
SPAC23G3.09	GO Biological Process	GO:0006399	tRNA metabolic process	Underrepresented	0.569259962049336 (3/527)	3.09639727361246 (159/5135)	0.00437116	SPAC27E2.06C;SPCC576.06C;SPCC4B3.01
SPBC115.02c	GO Biological Process	GO:0010565	regulation of cellular ketone metabolic process	Enriched	1.32827324478178 (7/527)	0.233690360272639 (12/5135)	0.00477984	SPAC12B10.13;SPAC343.04C;SPAC6F12.02;SPAC26H5.05;SPAC3H1.14;SPBC29A3.03C;SPBC106.13
SPAC31G5.21	GO Biological Process	GO:1901360	organic cyclic compound metabolic process	Underrepresented	23.5294117647059 (124/527)	31.080817916261 (1596/5135)	0.00551004	SPAC4F8.07C;SPBC29A3.18;SPAC1296.01C;SPBC21B10.03C;SPAC6B12.02C;SPBC1826.01C;SPAPB24D3.04C;SPBC713.06;SPBC947.08C;SPCC1840.06;SPCC965.05C;SPAC23G3.09;SPAC688.10;SPBC3B8.11;SPBC12D12.09;SPCC188.13C;SPBC29A10.09C;SPAC16C9.04C;SPAC32A11.03C;SPCC737.02C;SPAC3A11.07;SPAC23C11.08;SPAC11D3.07C;SPBP23A10.16;SPBP35G2.12;SPAC27E2.06C;SPCC1739.03;SPBC776.02C;SPBC28F2.12;SPBC1604.07;SPAC6G9.16C;SPAC23C4.12;S…
SPAPB1A10.12c	GO Biological Process	GO:0051716	cellular response to stimulus	Enriched	20.1138519924099 (106/527)	14.255111976631 (732/5135)	0.00781016	SPBC16A3.18;SPAC4F10.07C;SPAC29A4.11;SPCC162.07;SPAC6B12.02C;SPBC725.09C;SPAPB24D3.04C;SPBC713.06;SPAC20G8.10C;SPBC8D2.01;SPAC6F6.08C;SPBC887.09C;SPCC965.05C;SPAC688.10;SPAC22E12.04;SPAC17A2.13C;SPAC821.12;SPBC12D12.09;SPCC188.13C;SPAC1556.03;SPAC25A8.02;SPAC11G7.02;SPAC29E6.05C;SPAC1486.01;SPBC354.13;SPAC1D4.02C;SPBC27B12.04C;SPAC1687.09;SPAC17A2.09C;SPBC776.02C;SPBC3H7.13;SPAC821.10C;SPAC6G9.16…
SPAC4F8.07c	GO Biological Process	GO:0006109	regulation of carbohydrate metabolic process	Enriched	2.08728652751423 (11/527)	0.584225900681597 (30/5135)	0.00825697	SPAC12B10.13;SPAC343.04C;SPAC32A11.03C;SPAC23C11.08;SPBC119.02;SPAC6F12.02;SPAC3H1.14;SPAC227.15;SPBC29A3.03C;SPBC725.11C;SPBC106.13
SPBP23A10.15c	GO Biological Process	GO:0007006	mitochondrial membrane organization	Enriched	2.27703984819734 (12/527)	0.68159688412853 (35/5135)	0.00844384	SPAC17C9.06;SPBP18G5.02;SPBP23A10.16;SPAC1782.06C;SPBC1718.06;SPBC713.08;SPBC27B12.01C;SPCC1442.05C;SPBC16G5.07C;SPAPJ691.03;SPBC1A4.06C;SPBC3E7.05C
SPBC83.06c	GO Biological Process	GO:0009259	ribonucleotide metabolic process	Enriched	4.7438330170778 (25/527)	2.16163583252191 (111/5135)	0.00844384	SPAC4F8.07C;SPBC29A3.18;SPCC1840.06;SPAC32A11.03C;SPCC737.02C;SPAC3A11.07;SPBP23A10.16;SPBC1604.07;SPAC222.12C;SPAC1556.02C;SPBC16H5.06;SPAC24H6.04;SPCC338.10C;SPAC227.14;SPAC806.07;SPCC613.10;SPCC330.12C;SPCC306.09C;SPBP4H10.08;SPBC29A10.13;SPAC1782.07;SPBC16C6.08C;SPAC1296.02;SPBC19C7.03;SPAC14C4.14
SPAC1B3.20	GO Biological Process	GO:0061024	membrane organization	Enriched	6.64136622390892 (35/527)	3.46640701071081 (178/5135)	0.00940136	SPAPYUK71.03C;SPAC17C9.06;SPBC12C2.08;SPAC1F7.03;SPBP18G5.02;SPAC24B11.12C;SPAC4F10.16C;SPBP23A10.16;SPCPJ732.01;SPAC1782.06C;SPCC962.01;SPAC19A8.05C;SPCC1235.06;SPAP27G11.05C;SPBC1718.06;SPAC3F10.07C;SPBC1539.04;SPBC713.08;SPCC794.08;SPAC11H11.01;SPAC458.05;SPAC6F6.12;SPBC1734.08;SPBC19F8.03C;SPBC27B12.01C;SPBC1706.03;SPAC23H4.14;SPBC26H8.02C;SPCC1442.05C;SPBC16G5.07C;SPAPJ691.03;SPAC20G4.02C;SP…
SPAC13F5.07c	GO Biological Process	GO:0009267	cellular response to starvation	Enriched	3.41555977229602 (18/527)	1.34371957156767 (69/5135)	0.00987747	SPAC4F10.07C;SPAC20G8.10C;SPAC25A8.02;SPCC1682.11C;SPAC6F12.02;SPAC823.16C;SPAC10F6.11C;SPBC26H8.04C;SPAC589.07C;SPBC646.13;SPBC15D4.07C;SPBC4B4.10C;SPAC22H12.05C;SPBC30D10.10C;SPCC1919.03C;SPBC6B1.05C;SPBC725.11C;SPAC227.04
SPBC16G5.07c	GO Biological Process	GO:0042594	response to starvation	Enriched	3.41555977229602 (18/527)	1.34371957156767 (69/5135)	0.00987747	SPAC4F10.07C;SPAC20G8.10C;SPAC25A8.02;SPCC1682.11C;SPAC6F12.02;SPAC823.16C;SPAC10F6.11C;SPBC26H8.04C;SPAC589.07C;SPBC646.13;SPBC15D4.07C;SPBC4B4.10C;SPAC22H12.05C;SPBC30D10.10C;SPCC1919.03C;SPBC6B1.05C;SPBC725.11C;SPAC227.04
SPAC23D3.11	GO Biological Process	GO:0046128	purine ribonucleoside metabolic process	Enriched	4.17457305502846 (22/527)	1.77215189873418 (91/5135)	0.00987747	SPAC4F8.07C;SPBC29A3.18;SPCC1840.06;SPAC32A11.03C;SPCC737.02C;SPAC3A11.07;SPBP23A10.16;SPBC1604.07;SPAC222.12C;SPAC1556.02C;SPBC16H5.06;SPAC24H6.04;SPCC338.10C;SPAC806.07;SPCC613.10;SPCC330.12C;SPBP4H10.08;SPBC29A10.13;SPAC1782.07;SPBC16C6.08C;SPAC1296.02;SPAC14C4.14
SPBC215.10	Gene Expression		Oxidative Stess Cluster 4	Enriched	22.9601518026565 (121/527)	8.00389483933788 (411/5135)	2.08026e-26	SPBC16A3.18;SPAC4F10.07C;SPCC736.13;SPCC737.09C;SPAC664.15;SPAPB24D3.04C;SPBC23G7.06C;SPAC20G8.10C;SPAC12B10.13;SPAC20G4.05C;SPBC18H10.05;SPCC1840.06;SPAC1687.08;SPBC19C7.10;SPAC343.04C;SPAC25A8.02;SPAC688.03C;SPCC1919.04;SPAC1952.13;SPBP35G2.14;SPBC25B2.10;SPCC553.10;SPAC1D4.02C;SPBP35G2.12;SPAC27E2.06C;SPAC6G9.16C;SPAC2G11.13;SPAC4F10.20;SPAPB24D3.03;SPCC1682.11C;SPCC962.01;SPAC6F12.02;SPCPB1C1…
SPBP4H10.12	Gene Expression		Core Environmental Stress Response induced	Enriched	26.7552182163188 (141/527)	10.4381694255112 (536/5135)	3.14333e-26	SPBC16A3.18;SPAC4F10.07C;SPCC736.13;SPCC737.09C;SPAC664.15;SPAPB24D3.04C;SPBC23G7.06C;SPAC20G8.10C;SPCC126.07C;SPBC2D10.04;SPAC12B10.13;SPAC20G4.05C;SPBC18H10.05;SPCC1840.06;SPAC513.06C;SPAC1687.08;SPBC19C7.10;SPAC343.04C;SPAC25A8.02;SPAC688.03C;SPCC1919.04;SPCC191.09C;SPAC1952.13;SPBP35G2.14;SPBC25B2.10;SPAC1F7.12;SPCC553.10;SPAC1D4.02C;SPBP35G2.12;SPAC27E2.06C;SPCC330.11;SPAC821.10C;SPAC6G9.16C…
SPAC1610.04	Gene Expression		Reproduction module	Enriched	15.3700189753321 (81/527)	5.74488802336904 (295/5135)	1.39519e-14	SPAC4F10.07C;SPCC736.13;SPAC12B10.13;SPBC18H10.05;SPBC19C7.10;SPBP35G2.11C;SPAC688.03C;SPCC162.06C;SPBC19F5.01C;SPAC1F7.12;SPAC4F10.16C;SPAC11D3.07C;SPAC1486.01;SPAC23H3.04;SPBC1289.15;SPCC970.11C;SPAC6G9.16C;SPAC2G11.13;SPBC12C2.12C;SPAC27F1.05C;SPBC839.02;SPCC962.01;SPAC19A8.05C;SPCPB1C11.02;SPAC823.16C;SPAC31G5.18C;SPAC30D11.01C;SPCC285.07C;SPCC16A11.08;SPCC569.06;SPAC589.07C;SPBC1685.14C;SPCC…
SPBC29A10.13	Gene Expression		Repressed rpm1 mutant	Enriched	4.17457305502846 (22/527)	0.740019474196689 (38/5135)	6.86058e-10	SPBC29A3.18;SPCC1840.06;SPCC737.02C;SPAC3A11.07;SPAC1486.01;SPBC1604.07;SPAC222.12C;SPBC16H5.06;SPCC338.10C;SPBP23A10.15C;SPCC613.10;SPBP4H10.08;SPCC18.18C;SPCC1442.05C;SPBC1703.13C;SPAPJ691.03;SPBC29A10.13;SPAC1782.07;SPBC25H2.09;SPBC16C6.08C;SPAC1296.02;SPAC14C4.14
SPAC821.12	Gene Expression		Induced cig2 mutant	Enriched	4.55407969639469 (24/527)	1.14897760467381 (59/5135)	3.94147e-07	SPBC16A3.18;SPAPB24D3.04C;SPBC947.10;SPAC1952.13;SPAC19A8.05C;SPAC1687.22C;SPCC330.06C;SPBC16H5.12C;SPAC13F5.07C;SPACUNK12.02C;SPAC458.05;SPAC1F3.10C;SPBC14F5.11C;SPAC1002.12C;SPBC1198.13C;SPAC824.07;SPBC713.09;SPAC20G4.02C;SPAC22E12.03C;SPAC1610.04;SPBC1711.10C;SPCC4B3.01;SPBC32F12.10;SPCC1672.08C
SPACUNK12.02c	Gene Expression		Respiration module	Enriched	3.60531309297913 (19/527)	0.915287244401168 (47/5135)	1.16033e-05	SPBC23G7.06C;SPCC1840.06;SPCC737.02C;SPAC3A11.07;SPBC1604.07;SPBC16H5.06;SPCC338.10C;SPCC1450.07C;SPCC613.10;SPBP4H10.08;SPBC36.10;SPCC1442.05C;SPBC1703.13C;SPAC1782.07;SPBC25H2.09;SPCC1739.09C;SPAC29B12.03;SPBC16C6.08C;SPAC1296.02
SPAC1F7.12	Gene Expression		Nitrogen depletion total meiotic genes	Enriched	7.59013282732448 (40/527)	4.05063291139241 (208/5135)	0.00504223	SPCC736.13;SPAC12B10.13;SPAC20G4.05C;SPBC18H10.05;SPBP35G2.11C;SPAC688.03C;SPBC19F5.01C;SPAC1F7.12;SPBC1289.15;SPAC2G11.13;SPAPB24D3.03;SPAC27F1.05C;SPBC839.02;SPAC19A8.05C;SPCPB1C11.02;SPAC521.03;SPAC31G5.18C;SPAC30D11.01C;SPAC10F6.11C;SPCC16A11.08;SPAC589.07C;SPCC285.11;SPAC18B11.09C;SPAC630.05;SPAC11D3.16C;SPCC1450.07C;SPBC9B6.03;SPAC1002.12C;SPCC417.10;SPCC622.11;SPBC1604.01;SPAC20G4.02C;SPBC…
SPCC1906.02c	Gene Expression		Nitrogen depletion continuous meiotic genes	Enriched	3.41555977229602 (18/527)	1.32424537487829 (68/5135)	0.00853049	SPCC736.13;SPAC12B10.13;SPAC20G4.05C;SPBC18H10.05;SPAC688.03C;SPAC2G11.13;SPAC19A8.05C;SPAC31G5.18C;SPAC10F6.11C;SPAC589.07C;SPCC285.11;SPAC18B11.09C;SPAC630.05;SPCC622.11;SPCC576.01C;SPAPB8E5.04C;SPBC1271.05C;SPBC106.13
SPAC31A2.13c	Gene Expression		Middle meiotic genes	Enriched	15.7495256166983 (83/527)	10.6718597857838 (548/5135)	0.00987747	SPAC4F10.07C;SPBC15C4.06C;SPCC4F11.03C;SPBC3E7.04C;SPBC1826.01C;SPAC10F6.07C;SPCC126.07C;SPAC343.11C;SPCC63.04;SPAC23D3.14C;SPAC6B12.06C;SPAC1952.13;SPAC4F10.16C;SPAC144.10C;SPCC970.11C;SPCC1682.11C;SPAC23C4.12;SPAC1142.08;SPBC660.08;SPAC823.16C;SPAC24C9.14;SPAC1610.02C;SPAC14C4.10C;SPCC285.07C;SPBC530.01;SPBC30D10.08;SPCC4G3.12C;SPAC3F10.07C;SPBC19C2.11C;SPBC31F10.10C;SPCC1620.03;SPCC1450.08C;SP…
SPCC306.09c	Phenotypes (FYPO)	FYPO:0000049	inviable cell	Underrepresented	17.0777988614801 (90/527)	28.8607594936709 (1482/5135)	4.72812e-08	SPAC4F8.07C;SPCC162.07;SPAC17C9.06;SPBC1718.04;SPBC1826.01C;SPAC18B11.05;SPAC6F6.08C;SPAC3H8.06;SPAC1F7.03;SPBP18G5.02;SPBC887.09C;SPAC23G3.09;SPAC821.12;SPBC3B8.11;SPAC11G7.02;SPCC1281.06C;SPAC23A1.18C;SPAC1952.13;SPBC31A8.01C;SPBC119.02;SPAC27E2.06C;SPAC144.10C;SPCPJ732.01;SPBC28F2.12;SPBC3H7.13;SPBC12C2.10C;SPCC794.11C;SPAC56E4.02C;SPAC1610.02C;SPAC1002.09C;SPBC30D10.08;SPBC1718.06;SPBC1289.02…
SPBP35G2.12	Phenotypes (FYPO)	FYPO:0001489	inviable vegetative cell	Underrepresented	14.6110056925996 (77/527)	25.9591041869523 (1333/5135)	4.72812e-08	SPAC4F8.07C;SPAC17C9.06;SPBC1718.04;SPBC1826.01C;SPAC18B11.05;SPAC6F6.08C;SPAC3H8.06;SPBP18G5.02;SPBC887.09C;SPAC23G3.09;SPAC821.12;SPBC3B8.11;SPAC11G7.02;SPAC23A1.18C;SPAC1952.13;SPBC31A8.01C;SPBC119.02;SPAC27E2.06C;SPAC144.10C;SPBC28F2.12;SPBC3H7.13;SPBC12C2.10C;SPCC794.11C;SPAC56E4.02C;SPAC1610.02C;SPAC1002.09C;SPBC30D10.08;SPBC1718.06;SPBC1289.02C;SPBC19C2.11C;SPBC9B6.04C;SPBC1734.16C;SPCC794…
SPCC4G3.12c	Phenotypes (FYPO)	FYPO:0000316	inviable after spore germination	Underrepresented	6.64136622390892 (35/527)	15.6572541382668 (804/5135)	4.80698e-08	SPBC1718.04;SPBC1826.01C;SPAC18B11.05;SPAC6F6.08C;SPBC887.09C;SPAC23G3.09;SPBC3B8.11;SPAC1952.13;SPBC119.02;SPAC144.10C;SPBC28F2.12;SPBC12C2.10C;SPAC56E4.02C;SPAC1002.09C;SPBC1718.06;SPBC1734.16C;SPAC22G7.10;SPCC622.09;SPCC10H11.02;SPBC530.12C;SPBC1198.13C;SPBC146.01;SPCC320.09;SPBC14C8.01C;SPBC409.12C;SPCC576.15C;SPBC3B9.17;SPBP8B7.15C;SPAC13D6.05;SPAC2G11.14;SPBC1711.10C;SPBC1271.02;SPAC23G3.01…
SPAC1F3.10c	Phenotypes (FYPO)	FYPO:0002177	viable vegetative cell with normal cell morphology	Enriched	72.865275142315 (384/527)	60.2921129503408 (3096/5135)	1.44823e-07	SPBC16A3.18;SPAC4F10.07C;SPBC15C4.06C;SPAC29A4.11;SPBC1198.06C;SPBC29A3.18;SPCC736.13;SPAC1296.01C;SPAPYUK71.03C;SPBC1A4.04;SPBC21B10.03C;SPAC20G8.02;SPBPB2B2.18;SPCC737.09C;SPCC663.02;SPAC2G11.09;SPBC12C2.08;SPBC16C6.03C;SPAC664.15;SPAPB24D3.04C;SPBCPT2R1.02;SPAC10F6.07C;SPBC713.06;SPBC23G7.06C;SPAC20G8.10C;SPBC947.10;SPCC126.07C;SPBC8D2.01;SPBC2D10.04;SPAC12B10.13;SPAC20G4.05C;SPBC18H10.05;SPAC…
SPCC736.13	Phenotypes (FYPO)	FYPO:0002060	viable vegetative cell population	Enriched	84.6299810246679 (446/527)	74.0214216163583 (3801/5135)	4.28872e-07	SPBC16A3.18;SPAC4F10.07C;SPBC15C4.06C;SPAC4F8.07C;SPAC29A4.11;SPBC1198.06C;SPCC4F11.03C;SPBC29A3.18;SPCC736.13;SPAC1296.01C;SPAPYUK71.03C;SPBC1A4.04;SPBC21B10.03C;SPAC20G8.02;SPAC6B12.02C;SPBC725.09C;SPBPB2B2.18;SPCC737.09C;SPCC663.02;SPAC2G11.09;SPBC12C2.08;SPBC16C6.03C;SPAC664.15;SPAPB24D3.04C;SPBCPT2R1.02;SPAC10F6.07C;SPBC713.06;SPBC23G7.06C;SPAC20G8.10C;SPBC947.10;SPCC126.07C;SPBC8D2.01;SPBC2…
SPCC737.09c	Phenotypes (FYPO)	FYPO:0002061	inviable vegetative cell population	Underrepresented	17.0777988614801 (90/527)	27.9844206426485 (1437/5135)	4.28872e-07	SPAC4F8.07C;SPCC162.07;SPAC17C9.06;SPBC1718.04;SPBC1826.01C;SPAC18B11.05;SPAC6F6.08C;SPAC3H8.06;SPAC1F7.03;SPBP18G5.02;SPBC887.09C;SPAC23G3.09;SPAC821.12;SPBC3B8.11;SPCC1281.06C;SPAC23D3.14C;SPAC23A1.18C;SPAC1952.13;SPAC3A11.07;SPBC119.02;SPAC27E2.06C;SPAC144.10C;SPBC776.02C;SPBC28F2.12;SPAC821.10C;SPAC6F12.02;SPBC12C2.10C;SPAC56E4.02C;SPAC1002.09C;SPBC30D10.08;SPBC1718.06;SPBC1289.02C;SPBC19C2.1…
SPAC24B11.12c	Phenotypes (FYPO)	FYPO:0000124	viable cell	Enriched	81.7836812144213 (431/527)	70.8471275559883 (3638/5135)	5.59621e-07	SPBC16A3.18;SPAC4F10.07C;SPBC15C4.06C;SPAC29A4.11;SPBC1198.06C;SPCC4F11.03C;SPBC29A3.18;SPCC736.13;SPAC1296.01C;SPAPYUK71.03C;SPBC1A4.04;SPBC21B10.03C;SPAC20G8.02;SPAC6B12.02C;SPBC725.09C;SPBPB2B2.18;SPCC737.09C;SPCC663.02;SPAC2G11.09;SPBC12C2.08;SPBC16C6.03C;SPAC664.15;SPAPB24D3.04C;SPBCPT2R1.02;SPAC10F6.07C;SPBC713.06;SPBC23G7.06C;SPAC20G8.10C;SPBC947.10;SPCC126.07C;SPBC8D2.01;SPBC2D10.04;SPAC1…
SPBP35G2.06c	Phenotypes (FYPO)	FYPO:0001491	viable vegetative cell	Enriched	81.7836812144213 (431/527)	70.8471275559883 (3638/5135)	5.59621e-07	SPBC16A3.18;SPAC4F10.07C;SPBC15C4.06C;SPAC29A4.11;SPBC1198.06C;SPCC4F11.03C;SPBC29A3.18;SPCC736.13;SPAC1296.01C;SPAPYUK71.03C;SPBC1A4.04;SPBC21B10.03C;SPAC20G8.02;SPAC6B12.02C;SPBC725.09C;SPBPB2B2.18;SPCC737.09C;SPCC663.02;SPAC2G11.09;SPBC12C2.08;SPBC16C6.03C;SPAC664.15;SPAPB24D3.04C;SPBCPT2R1.02;SPAC10F6.07C;SPBC713.06;SPBC23G7.06C;SPAC20G8.10C;SPBC947.10;SPCC126.07C;SPBC8D2.01;SPBC2D10.04;SPAC1…
SPBC1271.05c	Phenotypes (FYPO)	FYPO:0002058	viable cell population	Enriched	85.7685009487666 (452/527)	75.6377799415774 (3884/5135)	7.88563e-07	SPBC16A3.18;SPAC4F10.07C;SPBC15C4.06C;SPAC4F8.07C;SPAC29A4.11;SPBC1198.06C;SPCC4F11.03C;SPBC29A3.18;SPCC736.13;SPAC1296.01C;SPAPYUK71.03C;SPBC1A4.04;SPBC21B10.03C;SPAC20G8.02;SPAC6B12.02C;SPBC725.09C;SPBPB2B2.18;SPCC737.09C;SPCC663.02;SPAC2G11.09;SPBC12C2.08;SPBC16C6.03C;SPAC664.15;SPAPB24D3.04C;SPBCPT2R1.02;SPAC10F6.07C;SPBC713.06;SPBC23G7.06C;SPAC20G8.10C;SPBC947.10;SPCC126.07C;SPBC8D2.01;SPBC2…
SPAC1039.11c	Phenotypes (FYPO)	FYPO:0002059	inviable cell population	Underrepresented	17.6470588235294 (93/527)	28.1986368062317 (1448/5135)	1.54169e-06	SPAC4F8.07C;SPCC162.07;SPAC17C9.06;SPBC1718.04;SPBC1826.01C;SPAC18B11.05;SPAC6F6.08C;SPAC3H8.06;SPAC1F7.03;SPBP18G5.02;SPBC887.09C;SPAC23G3.09;SPAC821.12;SPBC3B8.11;SPCC1281.06C;SPAC23D3.14C;SPAC23A1.18C;SPAC1952.13;SPAC3A11.07;SPBC119.02;SPAC27E2.06C;SPAC144.10C;SPCPJ732.01;SPBC776.02C;SPBC28F2.12;SPAC821.10C;SPAC6F12.02;SPBC12C2.10C;SPAC56E4.02C;SPAC1002.09C;SPBC30D10.08;SPBC1718.06;SPBC1289.02…
SPBC3B9.15c	Phenotypes (FYPO)	FYPO:0001490	inviable elongated vegetative cell	Underrepresented	2.27703984819734 (12/527)	7.8286270691334 (402/5135)	4.56178e-06	SPBC3B8.11;SPAC1952.13;SPBC12C2.10C;SPBC1734.16C;SPBC725.13C;SPCC10H11.02;SPAC26F1.10C;SPCC70.05C;SPBC409.12C;SPBC1711.17;SPAC13D6.05;SPBC1711.10C
SPBC106.13	Phenotypes (FYPO)	FYPO:0000163	abnormal autophagy	Enriched	2.27703984819734 (12/527)	0.428432327166504 (22/5135)	5.29116e-05	SPAC4F10.07C;SPAC20G8.10C;SPAC25A8.02;SPCC1682.11C;SPAC823.16C;SPAC10F6.11C;SPAC589.07C;SPBC15D4.07C;SPBC4B4.10C;SPAC22H12.05C;SPBC6B1.05C;SPAC227.04
SPBC12D12.09	Phenotypes (FYPO)	FYPO:0000380	abolished autophagy	Enriched	2.27703984819734 (12/527)	0.428432327166504 (22/5135)	5.29116e-05	SPAC4F10.07C;SPAC20G8.10C;SPAC25A8.02;SPCC1682.11C;SPAC823.16C;SPAC10F6.11C;SPAC589.07C;SPBC15D4.07C;SPBC4B4.10C;SPAC22H12.05C;SPBC6B1.05C;SPAC227.04
SPAC167.09	Phenotypes (FYPO)	FYPO:0002273	inviable vegetative cell with abnormal cell morphology	Underrepresented	2.27703984819734 (12/527)	7.16650438169426 (368/5135)	6.72e-05	SPAC6F6.08C;SPBC887.09C;SPBC3B8.11;SPAC1952.13;SPBC12C2.10C;SPAC1002.09C;SPBC1734.16C;SPCC10H11.02;SPCC320.09;SPBC409.12C;SPBC1711.10C;SPBC1271.02
SPAC631.02	Phenotypes (FYPO)	FYPO:0001991	inviable after spore germination, without cell division	Underrepresented	4.17457305502846 (22/527)	9.58130477117819 (492/5135)	0.000220708	SPBC1718.04;SPBC1826.01C;SPAC18B11.05;SPAC6F6.08C;SPAC23G3.09;SPBC119.02;SPAC144.10C;SPBC28F2.12;SPAC56E4.02C;SPAC22G7.10;SPCC622.09;SPBC530.12C;SPBC1198.13C;SPBC146.01;SPBC14C8.01C;SPBC3B9.17;SPBP8B7.15C;SPAC2G11.14;SPBC1271.02;SPAC23G3.01;SPBC32F12.10;SPBC337.12
SPAC3C7.02c	Phenotypes (FYPO)	FYPO:0002614	abnormal protein localization to pre-autophagosomal structure	Enriched	1.70777988614801 (9/527)	0.292112950340798 (15/5135)	0.000441642	SPAC20G8.10C;SPAC25A8.02;SPCC1682.11C;SPAC823.16C;SPAC589.07C;SPBC15D4.07C;SPBC4B4.10C;SPBC6B1.05C;SPAC227.04
SPAC6B12.06c	Phenotypes (FYPO)	FYPO:0002615	decreased protein localization to pre-autophagosomal structure	Enriched	1.5180265654649 (8/527)	0.233690360272639 (12/5135)	0.000506562	SPAC20G8.10C;SPAC25A8.02;SPCC1682.11C;SPAC589.07C;SPBC15D4.07C;SPBC4B4.10C;SPBC6B1.05C;SPAC227.04
SPAC20G8.10c	Phenotypes (FYPO)	FYPO:0001122	elongated vegetative cell	Underrepresented	8.72865275142315 (46/527)	15.111976630964 (776/5135)	0.000759558	SPAC6B12.02C;SPBC725.09C;SPAC6F6.08C;SPBC947.08C;SPBC19C7.10;SPBC3B8.11;SPAC32A11.03C;SPAC1952.13;SPBC19F5.01C;SPAC11D3.07C;SPBC31A8.01C;SPBC119.02;SPAC17A2.09C;SPBC3H7.13;SPAC1142.08;SPBC12C2.10C;SPAC1002.09C;SPBC1289.02C;SPAC1F3.02C;SPBC646.13;SPBC1734.16C;SPAC4D7.10C;SPACUNK12.02C;SPBC725.13C;SPCC10H11.02;SPBC530.14C;SPBC30D10.10C;SPAC26F1.10C;SPCC417.09C;SPCC306.09C;SPCC70.05C;SPBC6B1.09C;SPB…
SPAC1B3.21	Phenotypes (FYPO)	FYPO:0001127	abnormal cell size	Underrepresented	10.4364326375712 (55/527)	16.6504381694255 (855/5135)	0.00275026	SPAC6B12.02C;SPBC725.09C;SPAC6F6.08C;SPBC947.08C;SPBC19C7.10;SPBC3B8.11;SPAC32A11.03C;SPAC1952.13;SPBC19F5.01C;SPAC11D3.07C;SPBC31A8.01C;SPBC119.02;SPCPJ732.01;SPAC17A2.09C;SPBC3H7.13;SPAC19A8.05C;SPAC1142.08;SPBC12C2.10C;SPAC1002.09C;SPCC18.17C;SPCC74.03C;SPBC1289.02C;SPAC1F3.02C;SPBC646.13;SPBC1734.16C;SPAC4D7.10C;SPAC11H11.01;SPACUNK12.02C;SPAC458.05;SPBC725.13C;SPCC10H11.02;SPBC530.14C;SPBC30…
SPBC1773.05c	Phenotypes (FYPO)	FYPO:0000017	elongated cell	Underrepresented	9.4876660341556 (50/527)	15.365141187926 (789/5135)	0.00369536	SPAC6B12.02C;SPBC725.09C;SPAC6F6.08C;SPBC947.08C;SPBC19C7.10;SPBC3B8.11;SPAC32A11.03C;SPAC1952.13;SPBC19F5.01C;SPAC11D3.07C;SPBC31A8.01C;SPBC119.02;SPAC17A2.09C;SPBC3H7.13;SPAC19A8.05C;SPAC1142.08;SPBC12C2.10C;SPAC1002.09C;SPCC74.03C;SPBC1289.02C;SPAC1F3.02C;SPBC646.13;SPBC1734.16C;SPAC4D7.10C;SPAC11H11.01;SPACUNK12.02C;SPBC725.13C;SPCC10H11.02;SPBC530.14C;SPBC30D10.10C;SPAC26F1.10C;SPCC417.09C;S…
SPAC3C7.04	Phenotypes (FYPO)	FYPO:0002451	inviable vegetative cell with abnormal cell shape	Underrepresented	8.91840607210626 (47/527)	14.6835443037975 (754/5135)	0.00369536	SPAC4F8.07C;SPAC17C9.06;SPAC18B11.05;SPAC6F6.08C;SPAC3H8.06;SPBP18G5.02;SPBC887.09C;SPAC821.12;SPBC3B8.11;SPAC23A1.18C;SPAC1952.13;SPAC27E2.06C;SPAC144.10C;SPBC12C2.10C;SPAC1610.02C;SPBC30D10.08;SPBC19C2.11C;SPBC9B6.04C;SPBC1734.16C;SPCC576.06C;SPBC725.13C;SPAC1F3.10C;SPAC11E3.02C;SPCC10H11.02;SPBC21B10.11;SPCC645.03C;SPAC26F1.10C;SPBC27B12.01C;SPAC23E2.02;SPCC70.05C;SPBC15D4.11C;SPBP19A11.04C;SP…
SPBC12C2.02c	Phenotypes (FYPO)	FYPO:0001118	abnormal vegetative cell morphology	Underrepresented	14.8007590132827 (78/527)	21.3242453748783 (1095/5135)	0.00651452	SPAC6B12.02C;SPBC725.09C;SPAC18B11.05;SPAC6F6.08C;SPBC947.08C;SPBC887.09C;SPAC821.12;SPBC19C7.10;SPBC3B8.11;SPCC188.13C;SPAC11G7.02;SPAC32A11.03C;SPAC1952.13;SPBC19F5.01C;SPAC11D3.07C;SPBC354.13;SPBC31A8.01C;SPBC119.02;SPBC27B12.04C;SPAC17A2.09C;SPBC3H7.13;SPAC1142.08;SPBC12C2.10C;SPAP27G11.05C;SPCC663.01C;SPAC1002.09C;SPBC530.01;SPCC18.17C;SPBC1289.02C;SPBC19C2.11C;SPAC1F3.02C;SPBC646.13;SPBC31F…
SPBC1A4.06c	Phenotypes (FYPO)	FYPO:0000059	abnormal mitotic cell cycle	Underrepresented	10.4364326375712 (55/527)	16.1830574488802 (831/5135)	0.00803261	SPAC6B12.02C;SPBC725.09C;SPAC6F6.08C;SPBC947.08C;SPAC17A2.13C;SPBC19C7.10;SPBC3B8.11;SPAC11G7.02;SPAC32A11.03C;SPAC1952.13;SPBC19F5.01C;SPAC11D3.07C;SPBC31A8.01C;SPBC119.02;SPBC776.02C;SPBC3H7.13;SPAC821.10C;SPAC19A8.05C;SPAC1142.08;SPBC12C2.10C;SPAC1610.02C;SPAC1002.09C;SPBC1289.02C;SPAC1F3.02C;SPBC1539.04;SPBC1734.16C;SPCC794.08;SPBC725.13C;SPCC10H11.02;SPBC530.14C;SPBC30D10.10C;SPAC26F1.10C;SP…
SPBC1198.13c	Phenotypes (FYPO)	FYPO:0002281	inviable after spore germination with abnormal germ tube morphology	Underrepresented	0.759013282732448 (4/527)	3.23271665043817 (166/5135)	0.00987747	SPBC3B8.11;SPAC1952.13;SPBC12C2.10C;SPCC10H11.02
SPAC630.05	Protein Domains (Pfam)	PF03303	WTF protein	Enriched	2.84629981024668 (15/527)	0.389483933787731 (20/5135)	1.27248e-08	SPCC663.02;SPCC622.21;SPCC970.11C;SPCC285.07C;SPCC1450.08C;SPCC1620.02;SPCC1739.15;SPCC285.06C;SPCC162.04C;SPCC1919.06C;SPCC548.03C;SPCC1906.04;SPCC306.10;SPCC1906.03;SPCC553.05C
SPBC21B10.02	Protein Features		Serine	Higher	0.0971891	0.0889253	5.28187e-06	SPAC630.07C;SPAC23E2.02;SPAC227.11C;SPAC1D4.03C;SPAC23G3.01;SPAC1687.08;SPAC222.12C;SPAC821.12;SPAC30D11.01C;SPAC10F6.07C;SPAC10F6.11C;SPAC56E4.02C;SPAC6F12.12;SPAC20G8.04C;SPAC57A7.08;SPAC1002.12C;SPAC17G8.10C;SPAC1B9.02C;SPAC4F8.06;SPAC3F10.07C;SPAC1786.01C;SPAC24C9.07C;SPAC27F1.05C;SPAC17D4.01;SPAC11H11.01;SPAC4F10.20;SPAC22E12.03C;SPAC29A4.19C;SPAC26F1.10C;SPAPJ691.03;SPAC11D3.07C;SPAC18B11.0…
SPAC227.04	Protein Features		Proline	Higher	0.0505404	0.0460835	9.44469e-06	SPAC630.07C;SPAC23E2.02;SPAC227.11C;SPAC1D4.03C;SPAC23G3.01;SPAC1687.08;SPAC222.12C;SPAC821.12;SPAC30D11.01C;SPAC10F6.07C;SPAC10F6.11C;SPAC56E4.02C;SPAC6F12.12;SPAC20G8.04C;SPAC57A7.08;SPAC1002.12C;SPAC17G8.10C;SPAC1B9.02C;SPAC4F8.06;SPAC3F10.07C;SPAC1786.01C;SPAC24C9.07C;SPAC27F1.05C;SPAC17D4.01;SPAC11H11.01;SPAC4F10.20;SPAC22E12.03C;SPAC29A4.19C;SPAC26F1.10C;SPAPJ691.03;SPAC11D3.07C;SPAC18B11.0…
SPAP27G11.05c	Protein Features		Lysine	Lower	0.0621953	0.0685873	7.33176e-05	SPAC630.07C;SPAC23E2.02;SPAC227.11C;SPAC1D4.03C;SPAC23G3.01;SPAC1687.08;SPAC222.12C;SPAC821.12;SPAC30D11.01C;SPAC10F6.07C;SPAC10F6.11C;SPAC56E4.02C;SPAC6F12.12;SPAC20G8.04C;SPAC57A7.08;SPAC1002.12C;SPAC17G8.10C;SPAC1B9.02C;SPAC4F8.06;SPAC3F10.07C;SPAC1786.01C;SPAC24C9.07C;SPAC27F1.05C;SPAC17D4.01;SPAC11H11.01;SPAC4F10.20;SPAC22E12.03C;SPAC29A4.19C;SPAC26F1.10C;SPAPJ691.03;SPAC11D3.07C;SPAC18B11.0…
SPAC57A10.05c	Protein Features		Number of amino acids	Higher	530.23	456.99	0.000135886	SPAC630.07C;SPAC23E2.02;SPAC227.11C;SPAC1D4.03C;SPAC23G3.01;SPAC1687.08;SPAC222.12C;SPAC821.12;SPAC30D11.01C;SPAC10F6.07C;SPAC10F6.11C;SPAC56E4.02C;SPAC6F12.12;SPAC20G8.04C;SPAC57A7.08;SPAC1002.12C;SPAC17G8.10C;SPAC1B9.02C;SPAC4F8.06;SPAC3F10.07C;SPAC1786.01C;SPAC24C9.07C;SPAC27F1.05C;SPAC17D4.01;SPAC11H11.01;SPAC4F10.20;SPAC22E12.03C;SPAC29A4.19C;SPAC26F1.10C;SPAPJ691.03;SPAC11D3.07C;SPAC18B11.0…
SPBC1105.10	Protein Features		Molecular weight (kDa)	Higher	59.6407	51.5618	0.000244194	SPAC630.07C;SPAC23E2.02;SPAC227.11C;SPAC1D4.03C;SPAC23G3.01;SPAC1687.08;SPAC222.12C;SPAC821.12;SPAC30D11.01C;SPAC10F6.07C;SPAC10F6.11C;SPAC56E4.02C;SPAC6F12.12;SPAC20G8.04C;SPAC57A7.08;SPAC1002.12C;SPAC17G8.10C;SPAC1B9.02C;SPAC4F8.06;SPAC3F10.07C;SPAC1786.01C;SPAC24C9.07C;SPAC27F1.05C;SPAC17D4.01;SPAC11H11.01;SPAC4F10.20;SPAC22E12.03C;SPAC29A4.19C;SPAC26F1.10C;SPAPJ691.03;SPAC11D3.07C;SPAC18B11.0…
SPBC1734.16c	Protein Features		Threonine	Higher	0.0572312	0.0536977	0.00302212	SPAC630.07C;SPAC23E2.02;SPAC227.11C;SPAC1D4.03C;SPAC23G3.01;SPAC1687.08;SPAC222.12C;SPAC821.12;SPAC30D11.01C;SPAC10F6.07C;SPAC10F6.11C;SPAC56E4.02C;SPAC6F12.12;SPAC20G8.04C;SPAC57A7.08;SPAC1002.12C;SPAC17G8.10C;SPAC1B9.02C;SPAC4F8.06;SPAC3F10.07C;SPAC1786.01C;SPAC24C9.07C;SPAC27F1.05C;SPAC17D4.01;SPAC11H11.01;SPAC4F10.20;SPAC22E12.03C;SPAC29A4.19C;SPAC26F1.10C;SPAPJ691.03;SPAC11D3.07C;SPAC18B11.0…
SPBC13E7.11	Protein Localisations (ORFeome)		Mitochondrion	Enriched	14.4212523719165 (76/527)	9.28919182083739 (477/5135)	0.00415621	SPBC29A3.18;SPAC20G8.02;SPAC17C9.06;SPAC664.15;SPAC1556.03;SPBC776.15C;SPAC23A1.18C;SPCC737.02C;SPCC162.06C;SPAC3A11.07;SPAC1486.01;SPBP23A10.16;SPBC26H8.12;SPAC27E2.06C;SPBC1604.07;SPAC23C4.12;SPAC222.12C;SPBC660.08;SPAC1556.02C;SPCP31B10.02;SPBC19G7.18C;SPAC1002.09C;SPBC30D10.08;SPAC6B12.12;SPBC19C2.11C;SPBC713.08;SPCC1620.03;SPBC21B10.12;SPBC9B6.04C;SPCC965.04C;SPBC16H5.06;SPAC13F5.05;SPBC365.…
SPAC19A8.10	Transcript Features		mRNA copies per quiescent cell	Higher	1.55599	1.4522	7.88563e-07	SPAC630.07C;SPAC23E2.02;SPAC227.11C;SPAC1D4.03C;SPAC23G3.01;SPAC1687.08;SPAC222.12C;SPAC821.12;SPAC30D11.01C;SPAC10F6.07C;SPAC10F6.11C;SPAC56E4.02C;SPAC6F12.12;SPAC20G8.04C;SPAC57A7.08;SPAC1002.12C;SPAC17G8.10C;SPAC1B9.02C;SPAC4F8.06;SPAC3F10.07C;SPAC1786.01C;SPAC24C9.07C;SPAC27F1.05C;SPAC17D4.01;SPAC11H11.01;SPAC4F10.20;SPAC22E12.03C;SPAC29A4.19C;SPAC26F1.10C;SPAPJ691.03;SPAC11D3.07C;SPAC18B11.0…
SPCC1906.04	Transcript Features		mRNA stabilities	Lower	32.4101	37.7408	6.37039e-06	SPAC630.07C;SPAC23E2.02;SPAC227.11C;SPAC1D4.03C;SPAC23G3.01;SPAC1687.08;SPAC222.12C;SPAC821.12;SPAC30D11.01C;SPAC10F6.07C;SPAC10F6.11C;SPAC56E4.02C;SPAC6F12.12;SPAC20G8.04C;SPAC57A7.08;SPAC1002.12C;SPAC17G8.10C;SPAC1B9.02C;SPAC4F8.06;SPAC3F10.07C;SPAC1786.01C;SPAC24C9.07C;SPAC27F1.05C;SPAC17D4.01;SPAC11H11.01;SPAC4F10.20;SPAC22E12.03C;SPAC29A4.19C;SPAC26F1.10C;SPAPJ691.03;SPAC11D3.07C;SPAC18B11.0…
SPBC9B6.04c	Transcript Features		Annotated transcript length	Higher	2394.03	2119.58	5.29116e-05	SPAC630.07C;SPAC23E2.02;SPAC227.11C;SPAC1D4.03C;SPAC23G3.01;SPAC1687.08;SPAC222.12C;SPAC821.12;SPAC30D11.01C;SPAC10F6.07C;SPAC10F6.11C;SPAC56E4.02C;SPAC6F12.12;SPAC20G8.04C;SPAC57A7.08;SPAC1002.12C;SPAC17G8.10C;SPAC1B9.02C;SPAC4F8.06;SPAC3F10.07C;SPAC1786.01C;SPAC24C9.07C;SPAC27F1.05C;SPAC17D4.01;SPAC11H11.01;SPAC4F10.20;SPAC22E12.03C;SPAC29A4.19C;SPAC26F1.10C;SPAPJ691.03;SPAC11D3.07C;SPAC18B11.0…
SPBC119.07	Transcript Features		Ribosomal density (rb/kb)	Lower	3.8952	4.56169	0.000360258	SPAC630.07C;SPAC227.11C;SPAC1D4.03C;SPAC23G3.01;SPAC222.12C;SPAC10F6.11C;SPAC6F12.12;SPAC20G8.04C;SPAC57A7.08;SPAC1002.12C;SPAC1B9.02C;SPAC1786.01C;SPAC24C9.07C;SPAC27F1.05C;SPAC17D4.01;SPAC11H11.01;SPAC4F10.20;SPAC2G11.13;SPAC19E9.01C;SPAC631.02;SPAC23C11.08;SPAC13D6.05;SPAC32A11.03C;SPAC19A8.05C;SPAC11G7.02;SPAC23A1.18C;SPAC26H5.05;SPAC144.04C;SPAC2E12.03C;SPAC11D3.16C;SPAC521.03;SPAC57A10.08C;…
SPBC337.16
SPCC622.11
SPAC6C3.02c
SPCC1183.09c
SPAC17G8.13c
SPCC962.01
SPAC26F1.10c
SPAC1D4.02c
SPAC11D3.11c
SPBC30D10.10c
SPCC285.11
SPAC22G7.07c
SPAPYUK71.03c
SPCC16C4.09
SPAC15A10.01
SPAC4F8.06
SPBC9B6.06
SPBC8E4.04
SPBC725.11c
SPCC1235.06
SPAC1952.17c
SPBC1604.07
SPAC29B12.03
SPBC16C6.04
SPAC1782.07
SPBC19C2.11c
SPCC18.18c
SPAC1F3.03
SPAC824.07
SPAC227.15
SPAC2G11.13
SPBPB2B2.18
SPBC1778.06c
SPAC17C9.11c
SPBC1A4.04
SPBP35G2.14
SPBC1711.10c
SPAC19E9.01c
SPAC1B3.08
SPCC569.06
SPBC29A3.18
SPAC821.10c
SPBC1105.11c
SPBC800.02
SPCC1919.04
SPAC4A8.02c
SPAC1D4.03c
SPCC576.01c
SPAC22H12.05c
SPBC16E9.11c
SPBC2F12.05c
SPAC1635.01
SPCP1E11.03
SPBC30B4.03c
SPBC713.02c
SPAC11H11.01
SPBC14F5.07
SPBP8B7.15c
SPAC19A8.02
SPAC1610.02c
SPBC8D2.04
SPBP23A10.14c
SPCC663.15c
SPAC10F6.07c
SPBC19C7.03
SPBC30D10.08
SPAC23G3.01
SPBC713.06
SPCC622.21
SPSNORNA.21
SPAC17A2.06c
SPBP19A11.07c
SPCC338.10c
SPCC320.09
SPCP31B10.02
SPAC7D4.03c
SPCC1672.08c
SPAC343.04c
SPBC36.10
SPAC688.10
SPCC1742.01
SPAC1F7.03
SPCPB1C11.02
SPAC1002.09c
SPCC306.10
SPAC1834.09
SPAC222.12c
SPAC1002.05c
SPBC776.05
SPBC1709.11c
SPAC1006.05c
SPAC16C9.01c
SPBC19C7.10
SPAC24H6.04
SPBC1778.02
SPAC3H8.06
SPAC23C11.08
SPCC1281.07c
SPAC8C9.04
SPBC337.12
SPAC1805.15c
SPAC20G4.05c
SPCC70.12c
SPAC1834.03c
SPAC11E3.02c
SPAC26H5.05
SPAC1783.07c
SPBC21C3.20c
SPBC1861.09
SPAC732.02c
SPCC1739.09c
SPCC1442.05c
SPBC18H10.05
SPAC27E2.06c
SPBC1734.08
SPBC354.13
SPBC21.02
SPBC725.13c
SPBC27B12.04c
SPAC24C9.14
SPCC553.05c
SPCC550.09
SPBC1826.01c
SPBC6B1.05c
SPBC3B9.17
SPBC660.08
SPAC23H4.14
SPAC14C4.14
SPBC1921.05
SPAC16C9.04c
SPCC188.13c
SPBC32F12.10
SPCC4F11.03c
SPCC550.07
SPBC725.09c
SPAC1296.02
SPCC4B3.17
SPCC584.03c
SPAC1296.01c
SPBC106.03
SPBC119.02
SPBC32H8.12c
SPBC119.06
SPAC17G6.05c
SPBC947.10
SPCC1450.08c
SPAC15A10.16
SPBC16H5.06
SPBC12C2.08
SPCC613.10
SPAC6F6.12
SPBC19C2.04c
SPCC576.06c
SPBC21B10.11
SPCC330.06c
SPBP4H10.08
SPBC23G7.06c
SPCC126.07c
SPCC1442.04c
SPBC23G7.16
SPBC215.13
SPAC11D3.07c
SPCC1393.02c
SPAC458.05
SPBC1773.03c
SPAC521.03
SPAC20G8.04c
SPBP35G2.11c
SPBC15D4.07c
SPBC530.01
SPCC895.08c
SPAC11D3.16c
SPBC16G5.03
SPAC2G11.14
SPBC776.02c
SPAC17G8.10c
SPAC23A1.18c
SPCC330.12c
SPBC36B7.05c
SPBC1718.04
SPAC57A10.08c
SPBC16D10.05
SPBC25H2.09
SPAC31G5.18c
SPAC23H3.04
SPCC126.09
SPAC18B11.09c
SPBP18G5.02
SPAPB1E7.08c
SPAC167.05
SPCC1620.03
SPAC30D11.01c
SPAC664.15
SPBC16C6.08c
SPAC18G6.01c
SPCC320.14
SPAC18B11.05
SPBC354.05c
SPAC22F3.13
SPCC965.08c
SPAC1002.12c
SPAC25B8.08
SPBC16H5.12c
SPAC144.10c
SPCC162.04c
SPBC2D10.07c
SPCC285.07c
SPBC16C6.03c
SPAC6F12.03c
SPBC713.08
SPAC17C9.12
SPBC15D4.01c
SPSNORNA.34
SPBC530.12c
SPBP4H10.17c
SPAC17A2.13c
SPCC576.15c
SPBC146.01
SPAC24C9.07c
SPAC26F1.01
SPAC3A11.07
SPCC970.11c
SPBC1271.02
SPAC17D4.01
SPAC19A8.05c
SPBC1105.12
SPAC11E3.05
SPBC3B8.11
SPBC26H8.04c
SPAC13F5.05
SPBC12C2.10c
SPCC132.03
SPAC22E12.04
SPAC4F10.07c
SPAC1142.08
SPCC18.17c
SPBC1105.19
SPAC11G7.02
SPAC12B10.13
SPAC6F12.02
SPCC965.05c
SPAPJ691.03
SPBC32F12.07c
SPAC227.11c
SPAC22E12.03c
SPBC365.08c
SPBC27B12.01c
SPCC965.04c
SPCC18.09c
SPBP19A11.04c
SPBC1685.14c
SPBC1271.15c
SPCC794.11c
SPBC26H8.01
SPCC70.05c
SPCC330.21
SPSNORNA.20
SPAC56E4.02c
SPCC622.09
SPBC31F10.10c
SPCC74.03c
SPAC1687.08
SPAC6F12.12
SPAC688.11
SPAC2F7.06c
SPAC23D3.14c
SPBC609.02
SPBC409.23
SPCC1906.03
SPBC2D10.04
SPCC162.06c
SPAC27F1.05c
SPBC887.09c
SPAC1782.06c
SPBC25B2.10
SPBC6B1.02
SPBC21B10.03c
SPAC26H5.11
SPAC6B12.13
SPBC839.02
SPAC13D6.05
SPBC1703.13c
SPAC607.07c
SPBC26H8.12
SPAC1F3.02c
SPAC1556.02c
SPAP19A11.05c
SPBC19F8.03c
SPAC2E12.03c
SPAC12B10.01c
SPBC1539.04
SPBC1105.08
SPAC513.06c
SPAC29E6.09
SPAC25G10.01
SPBC1709.09
SPBC13E7.03c
SPAC2G11.09
SPAC212.02
SPAPB24D3.04c
SPCC1235.08c
SPAC6G9.16c
SPBC651.09c
SPCC61.05
SPAC25A8.02
SPBC1706.03
SPAC4G8.04
SPCC188.08c
SPAC23C4.12
SPCC1281.06c
SPCC191.09c
SPAPB24D3.03
SPBC15C4.06c
SPCC188.07
SPCC1682.11c
SPAC5D6.04
SPAC688.03c
SPBC1773.02c
SPBC14F5.11c
SPCC1235.01
SPCC737.02c
SPAC24C9.08
SPBC409.12c
SPBC3E7.05c
SPAC20G8.02
SPBCPT2R1.02
SPBC26H8.02c
SPAC3A11.09
SPBC119.05c
SPAC23H3.14
SPCC548.03c
SPAC806.07
SPCC330.01c
SPBC1289.02c
SPCC645.03c
SPBC530.14c
SPAC1952.13
SPCC330.11
SPBC12C2.12c
SPCC1620.02
SPCC417.10
SPBC365.02c
SPBP23A10.16
SPAC29E6.01
SPAC17G6.03
SPAPB8E5.04c
SPCC1840.06
SPCC1919.03c
SPAC4F10.20
SPBC4B4.02c
SPBC30D10.09c
SPCC63.04
SPAC6B12.12
SPAC1486.01
SPAC1786.01c
SPBC19G7.18c
SPAC29B12.11c
SPBC713.09
SPAC823.16c
SPCC1739.01
SPCPJ732.01
SPBC31A8.01c
SPBC9B6.03
SPBC17D11.02c
SPAC29A4.19c
SPCC4B3.01
SPCC1450.12
SPCC1322.10
SPBC1711.17
SPBC8D2.01
SPAC630.04c
SPAC630.07c
SPCC663.01c
SPBC1198.06c
SPAC24B11.05
SPCC794.08
SPAC2F3.16
SPBC1718.06
SPBC1289.15
SPBC19F8.06c
SPCC736.11
SPBC646.08c
SPCC417.09c
SPBC27B12.14
SPAC15A10.17
SPBC660.17c
SPAC6B12.02c
SPAC1687.22c
SPAC4F10.02
SPBC16H5.13
SPAC22G7.10
SPAC20G4.02c
SPBC29A10.09c
SPAC4D7.10c
SPAC513.05
SPAC57A7.08
SPBC1604.01
SPCC23B6.01c
SPBP22H7.04
SPBC543.09
SPBC25B2.11
SPCC1450.07c
SPCC1450.09c
SPAPB2B4.06
SPBC609.03
SPBC16A3.18
SPCC553.10
SPBC15D4.11c
SPBC28F2.12
SPCC10H11.02
SPCC1739.03
SPCC663.02
SPBC1703.12
SPAC3H1.14
SPBC1604.21c
SPBC342.04
SPAC6F6.08c
SPCC1739.15
SPAC589.07c
SPAC29A4.11
SPBC23G7.11
SPAC3F10.07c
SPAC343.11c

## Sheet: cluster 6 
S3_7 Table. Cluster 6, functional enrichments.
Data were grouped into clusters as described. Gene group enrichments were determined for each cluster using AnGeLi.
cluster_6	Category_Name	External_ID	GeneSet_Name	over_represented/under_represented	List_Frequency	Background_Frequency	Corrected_pvalue	Genes_In_Common/Interacting_Gene_Pair
SPAC11G7.04	GO Biological Process	GO:0071840	cellular component organization or biogenesis	Enriched	42.5414364640884 (462/1086)	33.5345666991237 (1722/5135)	2.71867e-09	SPBC2G5.03;SPBC646.17C;SPCC126.15C;SPBC16G5.04;SPBC4C3.06;SPBP22H7.08;SPAC19B12.03;SPBC16C6.07C;SPBC649.02;SPAC1751.03;SPBC17D1.07C;SPBC19C2.01;SPCC18.14C;SPBC12C2.05C;SPBC609.05;SPBC1105.17;SPCC1235.05C;SPBC1709.12;SPCC5E4.04;SPAC144.07C;SPAC806.02C;SPCC1235.09;SPAC6F6.17;SPBC13G1.06C;SPBC1604.09C;SPCC970.12;SPCC553.08C;SPBC31F10.12;SPBC13E7.08C;SPAC26A3.16;SPCC126.13C;SPBC17G9.04C;SPBC365.10;SP…
SPBC1683.10c	GO Biological Process	GO:0007067	mitotic nuclear division	Enriched	8.10313075506446 (88/1086)	4.44011684518014 (228/5135)	3.25532e-07	SPBC16C6.07C;SPBC609.05;SPCC5E4.04;SPAC144.07C;SPCC970.12;SPBC409.09C;SPAC1687.18C;SPAC23D3.07;SPCC188.03;SPAC1093.06C;SPAC10F6.09C;SPBC106.09;SPCC1795.04C;SPAC3G6.02;SPAC1805.08;SPCC576.10C;SPCC1235.07;SPAC31A2.15C;SPAC1786.03;SPBC725.12;SPAC31A2.16;SPBC25D12.02C;SPBC365.06;SPCC736.14;SPAC17C9.13C;SPAC19D5.11C;SPCC1739.11C;SPCC550.13;SPCC1393.04;SPAC637.10C;SPBC19F8.02;SPAC11E3.03;SPBC4.07C;SPAC…
SPAC4D7.05	GO Biological Process	GO:0016043	cellular component organization	Enriched	34.622467771639 (376/1086)	27.2249269717624 (1398/5135)	6.11236e-07	SPBC2G5.03;SPBC646.17C;SPCC126.15C;SPBC16G5.04;SPBC4C3.06;SPAC19B12.03;SPBC16C6.07C;SPAC1751.03;SPBC17D1.07C;SPBC19C2.01;SPBC12C2.05C;SPBC609.05;SPBC1105.17;SPCC1235.05C;SPBC1709.12;SPCC5E4.04;SPAC144.07C;SPAC806.02C;SPCC1235.09;SPAC6F6.17;SPBC13G1.06C;SPCC970.12;SPBC13E7.08C;SPAC26A3.16;SPCC126.13C;SPBC365.10;SPBC409.09C;SPCC16C4.18C;SPAC17H9.10C;SPCC31H12.04C;SPBP23A10.08;SPBC13G1.03C;SPBC36.12…
SPAC694.02	GO Biological Process	GO:0051276	chromosome organization	Enriched	14.4567219152855 (157/1086)	9.50340798442064 (488/5135)	7.11522e-07	SPBC16C6.07C;SPBC609.05;SPBC1105.17;SPCC1235.05C;SPCC5E4.04;SPAC144.07C;SPCC1235.09;SPAC6F6.17;SPCC970.12;SPBC13E7.08C;SPCC126.13C;SPBC365.10;SPBC409.09C;SPCC16C4.18C;SPAC17H9.10C;SPBP23A10.08;SPAC1687.18C;SPCC24B10.19C;SPAC23D3.07;SPCC188.03;SPAC1093.06C;SPCC1682.13;SPAC10F6.09C;SPBC106.09;SPCC126.02C;SPCC1795.04C;SPAC3G6.02;SPBC725.08;SPAC23H3.05C;SPAC1610.01;SPBC6B1.12C;SPBC887.18C;SPAC1805.08…
SPAC16A10.05c	GO Biological Process	GO:0009987	cellular process	Enriched	83.2412523020258 (904/1086)	76.7478091528724 (3941/5135)	1.56505e-06	SPBC337.03;SPAC4G8.06C;SPBC2G5.03;SPBC1709.04C;SPAC922.05C;SPBC646.17C;SPCC126.15C;SPBC16G5.04;SPAC2F7.04;SPAC959.08;SPBC4C3.06;SPBP22H7.08;SPBC9B6.10;SPAC19B12.03;SPBC16C6.07C;SPBC16H5.05C;SPBC32C12.03C;SPCC1223.10C;SPCC1442.10C;SPBC649.02;SPAC1751.03;SPBC17D1.07C;SPBC19C2.01;SPCC18.14C;SPBC12C2.05C;SPBC17G9.08C;SPBC609.05;SPAC1805.06C;SPBC1105.17;SPCC1235.05C;SPBC1709.12;SPBC19C2.13C;SPCC5E4.04…
SPAC22E12.17c	GO Biological Process	GO:1902589	single-organism organelle organization	Enriched	21.4548802946593 (233/1086)	15.5793573515093 (800/5135)	1.65026e-06	SPBC16G5.04;SPBC4C3.06;SPBC16C6.07C;SPBC12C2.05C;SPBC609.05;SPBC1709.12;SPCC5E4.04;SPAC144.07C;SPCC1235.09;SPAC6F6.17;SPCC970.12;SPBC13E7.08C;SPAC26A3.16;SPCC126.13C;SPBC409.09C;SPCC16C4.18C;SPBP23A10.08;SPBC13G1.03C;SPAC1687.18C;SPAC12B10.07;SPCC24B10.19C;SPAC23D3.07;SPAC3G9.05;SPCC24B10.05;SPCC188.03;SPAC1093.06C;SPBC11C11.04C;SPCC1682.13;SPBC31F10.07;SPAC343.02;SPAC10F6.09C;SPBC25H2.04C;SPCC12…
SPCC306.04c	GO Biological Process	GO:0045047	protein targeting to ER	Enriched	1.65745856353591 (18/1086)	0.447906523855891 (23/5135)	1.82392e-06	SPCC126.15C;SPBC3B9.03;SPAC23H4.07C;SPCC320.10;SPBC409.21;SPAC17G6.09;SPAC19B12.09;SPCC1682.05C;SPBC354.02C;SPAC4G8.02C;SPAC1071.03C;SPAC2F3.02;SPBC887.22;SPCC188.06C;SPAC1071.04C;SPAC17H9.07;SPBC2G2.03C;SPAC1F5.06
SPCC790.03	GO Biological Process	GO:0072599	establishment of protein localization to endoplasmic reticulum	Enriched	1.65745856353591 (18/1086)	0.447906523855891 (23/5135)	1.82392e-06	SPCC126.15C;SPBC3B9.03;SPAC23H4.07C;SPCC320.10;SPBC409.21;SPAC17G6.09;SPAC19B12.09;SPCC1682.05C;SPBC354.02C;SPAC4G8.02C;SPAC1071.03C;SPAC2F3.02;SPBC887.22;SPCC188.06C;SPAC1071.04C;SPAC17H9.07;SPBC2G2.03C;SPAC1F5.06
SPAC19D5.06c	GO Biological Process	GO:1903047	mitotic cell cycle process	Enriched	13.4438305709024 (146/1086)	8.80233690360273 (452/5135)	1.83182e-06	SPBC16C6.07C;SPBC609.05;SPCC5E4.04;SPAC144.07C;SPBC17D11.06;SPCC970.12;SPBC23E6.07C;SPAC26A3.16;SPBC409.09C;SPBC36.12C;SPAC1687.18C;SPAC12B10.07;SPAC23D3.07;SPCC188.03;SPAC1093.06C;SPAC10F6.09C;SPBC106.09;SPCC1795.04C;SPAC4D7.07C;SPAC3G6.02;SPAC1805.08;SPCC576.10C;SPCC1235.07;SPBC947.12;SPAC31A2.15C;SPAC1786.03;SPBC725.12;SPAC31A2.16;SPAC1B2.05;SPBC25D12.02C;SPBC365.06;SPCC736.14;SPBC887.10;SPAC9…
SPBC1A4.02c	GO Biological Process	GO:0000070	mitotic sister chromatid segregation	Enriched	6.7219152854512 (73/1086)	3.6222005842259 (186/5135)	2.77797e-06	SPBC16C6.07C;SPBC609.05;SPCC5E4.04;SPAC144.07C;SPCC970.12;SPBC409.09C;SPAC1687.18C;SPAC23D3.07;SPCC188.03;SPAC1093.06C;SPAC10F6.09C;SPBC106.09;SPCC1795.04C;SPAC3G6.02;SPAC1805.08;SPCC576.10C;SPCC1235.07;SPAC31A2.15C;SPBC725.12;SPBC365.06;SPCC736.14;SPAC17C9.13C;SPAC19D5.11C;SPCC550.13;SPCC1393.04;SPAC637.10C;SPBC19F8.02;SPAC11E3.03;SPBC4.07C;SPAC17C9.01C;SPBC16G5.12C;SPAC17G8.15;SPAC688.02C;SPBC1…
SPAC9.07c	GO Biological Process	GO:0000278	mitotic cell cycle	Enriched	13.4438305709024 (146/1086)	8.91918208373905 (458/5135)	4.25606e-06	SPBC16C6.07C;SPBC609.05;SPCC5E4.04;SPAC144.07C;SPBC17D11.06;SPCC970.12;SPBC23E6.07C;SPAC26A3.16;SPBC409.09C;SPBC36.12C;SPAC1687.18C;SPAC12B10.07;SPAC23D3.07;SPCC188.03;SPAC1093.06C;SPAC10F6.09C;SPBC106.09;SPCC1795.04C;SPAC4D7.07C;SPAC3G6.02;SPAC1805.08;SPCC576.10C;SPCC1235.07;SPBC947.12;SPAC31A2.15C;SPAC1786.03;SPBC725.12;SPAC31A2.16;SPAC1B2.05;SPBC25D12.02C;SPBC365.06;SPCC736.14;SPBC887.10;SPAC9…
SPAC1B1.04c	GO Biological Process	GO:0043170	macromolecule metabolic process	Enriched	52.7624309392265 (573/1086)	45.2580331061344 (2324/5135)	5.44412e-06	SPBC337.03;SPAC4G8.06C;SPBC2G5.03;SPBC1709.04C;SPBC16G5.04;SPAC2F7.04;SPAC959.08;SPBP22H7.08;SPBC9B6.10;SPAC19B12.03;SPBC16C6.07C;SPBC16H5.05C;SPBC32C12.03C;SPCC1223.10C;SPCC1442.10C;SPBC649.02;SPAC1751.03;SPAC1805.04;SPBC19C2.01;SPCC18.14C;SPBC609.05;SPCC1235.05C;SPBC19C2.13C;SPCC5E4.04;SPCC1235.09;SPBC17D11.06;SPAC6F6.17;SPCC1795.11;SPBC1604.09C;SPBC691.02C;SPBC13E7.08C;SPBC23E6.07C;SPAC26A3.16…
SPAC13G7.01c	GO Biological Process	GO:0000819	sister chromatid segregation	Enriched	6.7219152854512 (73/1086)	3.68062317429406 (189/5135)	5.87786e-06	SPBC16C6.07C;SPBC609.05;SPCC5E4.04;SPAC144.07C;SPCC970.12;SPBC409.09C;SPAC1687.18C;SPAC23D3.07;SPCC188.03;SPAC1093.06C;SPAC10F6.09C;SPBC106.09;SPCC1795.04C;SPAC3G6.02;SPAC1805.08;SPCC576.10C;SPCC1235.07;SPAC31A2.15C;SPBC725.12;SPBC365.06;SPCC736.14;SPAC17C9.13C;SPAC19D5.11C;SPCC550.13;SPCC1393.04;SPAC637.10C;SPBC19F8.02;SPAC11E3.03;SPBC4.07C;SPAC17C9.01C;SPBC16G5.12C;SPAC17G8.15;SPAC688.02C;SPBC1…
SPCC1494.02c	GO Biological Process	GO:0007059	chromosome segregation	Enriched	7.2744014732965 (79/1086)	4.22590068159688 (217/5135)	2.45418e-05	SPBC16C6.07C;SPBC609.05;SPCC5E4.04;SPAC144.07C;SPCC970.12;SPBC409.09C;SPAC1687.18C;SPAC23D3.07;SPCC188.03;SPAC1093.06C;SPAC10F6.09C;SPBC106.09;SPCC1795.04C;SPAC3G6.02;SPAC1805.08;SPCC576.10C;SPCC1235.07;SPAC31A2.15C;SPBC725.12;SPBC365.06;SPCC736.14;SPAC17C9.13C;SPAC19D5.11C;SPCC550.13;SPCC1393.04;SPAC637.10C;SPAC1687.05;SPBC19F8.02;SPAC11E3.03;SPBC4.07C;SPAC17C9.01C;SPBC16G5.12C;SPAC17G8.15;SPAC6…
SPCC965.03	GO Biological Process	GO:0034645	cellular macromolecule biosynthetic process	Enriched	27.4401473296501 (298/1086)	21.4800389483934 (1103/5135)	2.45418e-05	SPBC337.03;SPBC2G5.03;SPBC16G5.04;SPAC2F7.04;SPAC959.08;SPBP22H7.08;SPAC19B12.03;SPCC1223.10C;SPCC1442.10C;SPBC649.02;SPAC1751.03;SPCC18.14C;SPBC609.05;SPCC1235.05C;SPCC1235.09;SPBC17D11.06;SPCC1795.11;SPBC13E7.08C;SPBC23E6.07C;SPBC365.10;SPCC16C4.18C;SPBC13G1.10C;SPAC17H9.10C;SPAC4G9.16C;SPCC31H12.04C;SPBC36.12C;SPCC24B10.22;SPBC28F2.11;SPAC6G9.12;SPCC1223.07C;SPCC1682.13;SPBC56F2.02;SPAC22F8.07…
SPBC106.06	GO Biological Process	GO:0009059	macromolecule biosynthetic process	Enriched	27.4401473296501 (298/1086)	21.5384615384615 (1106/5135)	3.04632e-05	SPBC337.03;SPBC2G5.03;SPBC16G5.04;SPAC2F7.04;SPAC959.08;SPBP22H7.08;SPAC19B12.03;SPCC1223.10C;SPCC1442.10C;SPBC649.02;SPAC1751.03;SPCC18.14C;SPBC609.05;SPCC1235.05C;SPCC1235.09;SPBC17D11.06;SPCC1795.11;SPBC13E7.08C;SPBC23E6.07C;SPBC365.10;SPCC16C4.18C;SPBC13G1.10C;SPAC17H9.10C;SPAC4G9.16C;SPCC31H12.04C;SPBC36.12C;SPCC24B10.22;SPBC28F2.11;SPAC6G9.12;SPCC1223.07C;SPCC1682.13;SPBC56F2.02;SPAC22F8.07…
SPBC19F5.03	GO Biological Process	GO:0043933	macromolecular complex subunit organization	Enriched	16.390423572744 (178/1086)	11.7429406037001 (603/5135)	3.58726e-05	SPCC126.15C;SPAC1751.03;SPBC19C2.01;SPBC12C2.05C;SPBC609.05;SPBC1105.17;SPCC1235.05C;SPCC1235.09;SPCC970.12;SPBC13E7.08C;SPAC26A3.16;SPCC126.13C;SPBC365.10;SPCC16C4.18C;SPAC17H9.10C;SPCC31H12.04C;SPBP23A10.08;SPBC1604.25;SPAC12B10.07;SPCC24B10.19C;SPAC3G9.05;SPBC11C11.04C;SPCC1682.13;SPBC31F10.07;SPCC285.13C;SPBC21D10.07;SPAC4D7.07C;SPBC725.08;SPAC23H3.05C;SPAC1610.01;SPAC4D7.13;SPBC6B1.12C;SPBC8…
SPAC29E6.02	GO Biological Process	GO:0006612	protein targeting to membrane	Enriched	1.74953959484346 (19/1086)	0.56475170399221 (29/5135)	4.42565e-05	SPCC126.15C;SPBC3B9.03;SPAC23H4.07C;SPCC320.10;SPAC2E1P5.04C;SPBC409.21;SPAC17G6.09;SPAC19B12.09;SPCC1682.05C;SPCC1620.05;SPBC354.02C;SPAC4G8.02C;SPAC1071.03C;SPAC2F3.02;SPCC188.06C;SPAC17H9.07;SPBC2G2.03C;SPAC167.02;SPAC1F5.06
SPAPJ698.02c	GO Biological Process	GO:0008150	biological process	Enriched	99.8158379373849 (1084/1086)	98.3057448880234 (5048/5135)	6.06741e-05	SPBC337.03;SPAC23D3.16;SPAC4G8.06C;SPBC2G5.03;SPBC1709.04C;SPAC922.05C;SPBC646.17C;SPCC126.15C;SPBC16G5.04;SPAC2F7.04;SPAC959.08;SPBC4C3.06;SPBP22H7.08;SPBC9B6.10;SPAC19B12.03;SPBC16C6.07C;SPBC16H5.05C;SPBC32C12.03C;SPCC1223.10C;SPCC1442.10C;SPBC649.02;SPAC1751.03;SPAC1805.04;SPBC17D1.07C;SPBC19C2.01;SPCC18.14C;SPBC12C2.05C;SPBC17G9.08C;SPBC609.05;SPAC1805.06C;SPBC1105.17;SPCC1235.05C;SPBC1709.12…
SPAC959.08	GO Biological Process	GO:0006614	SRP-dependent cotranslational protein targeting to membrane	Enriched	1.10497237569061 (12/1086)	0.272638753651412 (14/5135)	6.38108e-05	SPCC126.15C;SPAC23H4.07C;SPBC3B9.03;SPCC320.10;SPAC19B12.09;SPCC1682.05C;SPBC354.02C;SPAC4G8.02C;SPAC1071.03C;SPCC188.06C;SPAC17H9.07;SPBC2G2.03C
SPCC1682.13	GO Biological Process	GO:0044260	cellular macromolecule metabolic process	Enriched	50.6445672191529 (550/1086)	43.8948393378773 (2254/5135)	6.66435e-05	SPBC337.03;SPAC4G8.06C;SPBC2G5.03;SPBC1709.04C;SPBC16G5.04;SPAC2F7.04;SPAC959.08;SPBP22H7.08;SPBC9B6.10;SPAC19B12.03;SPBC16C6.07C;SPBC16H5.05C;SPBC32C12.03C;SPCC1223.10C;SPCC1442.10C;SPBC649.02;SPAC1751.03;SPBC19C2.01;SPCC18.14C;SPBC609.05;SPCC1235.05C;SPBC19C2.13C;SPCC1235.09;SPBC17D11.06;SPAC6F6.17;SPCC1795.11;SPBC1604.09C;SPBC691.02C;SPBC13E7.08C;SPBC23E6.07C;SPAC26A3.16;SPCC126.13C;SPBC365.10…
SPAC4F8.05c	GO Biological Process	GO:0006996	organelle organization	Enriched	28.3609576427256 (308/1086)	22.7069133398247 (1166/5135)	0.000119654	SPBC646.17C;SPBC16G5.04;SPBC4C3.06;SPBC16C6.07C;SPBC17D1.07C;SPBC12C2.05C;SPBC609.05;SPBC1105.17;SPCC1235.05C;SPBC1709.12;SPCC5E4.04;SPAC144.07C;SPCC1235.09;SPAC6F6.17;SPCC970.12;SPBC13E7.08C;SPAC26A3.16;SPCC126.13C;SPBC365.10;SPBC409.09C;SPCC16C4.18C;SPAC17H9.10C;SPCC31H12.04C;SPBP23A10.08;SPBC13G1.03C;SPCC24B10.22;SPBC1604.25;SPAC1687.18C;SPAC12B10.07;SPCC24B10.19C;SPAC23D3.07;SPAC3G9.05;SPBC11…
SPAC15F9.03c	GO Biological Process	GO:0090150	establishment of protein localization to membrane	Enriched	2.94659300184162 (32/1086)	1.3047711781889 (67/5135)	0.000134859	SPCC126.15C;SPCC24B10.05;SPBC3B9.03;SPAC23H4.07C;SPCC1672.12C;SPBC25H2.04C;SPBC13G1.07;SPAC2E1P5.04C;SPCC320.10;SPBC27B12.10C;SPBC543.10;SPAC13G6.04;SPAC17H9.17C;SPBC409.21;SPAC17G6.09;SPAC19B12.09;SPCC1682.05C;SPAC1142.06;SPCC1620.05;SPBC354.02C;SPBP4H10.03;SPAC9G1.04;SPAC4G8.02C;SPAC1071.03C;SPAC2F3.02;SPCC188.06C;SPAC222.03C;SPAC17H9.07;SPAC17C9.09C;SPBC2G2.03C;SPAC167.02;SPAC1F5.06
SPAC1142.06	GO Biological Process	GO:0051641	cellular localization	Enriched	20.3499079189687 (221/1086)	15.4819863680623 (795/5135)	0.000158184	SPBC646.17C;SPCC126.15C;SPBP22H7.08;SPAC1805.04;SPBC609.05;SPAC4D7.12C;SPCC285.08;SPBC691.02C;SPCC576.07;SPBC17G9.04C;SPCC1739.14;SPBC13G1.03C;SPCC1442.17C;SPAC6G9.12;SPAC1687.18C;SPAC12B10.07;SPBC119.17;SPCC24B10.05;SPAC1093.06C;SPAC23H4.07C;SPBC3B9.03;SPBC106.20;SPBC31F10.07;SPCC1672.12C;SPBC3B9.12;SPBC25H2.04C;SPCC285.13C;SPAC12B10.02C;SPAC824.09C;SPBC1709.10C;SPAC1805.08;SPBC13G1.07;SPAC3C7.1…
SPAC20H4.05c	GO Biological Process	GO:0070972	protein localization to endoplasmic reticulum	Enriched	1.74953959484346 (19/1086)	0.603700097370984 (31/5135)	0.000158184	SPCC126.15C;SPBC3B9.03;SPAC23H4.07C;SPCC320.10;SPBC409.21;SPAC17G6.09;SPAC19B12.09;SPCC1682.05C;SPAC227.01C;SPBC354.02C;SPAC4G8.02C;SPAC1071.03C;SPAC2F3.02;SPBC887.22;SPCC188.06C;SPAC1071.04C;SPAC17H9.07;SPBC2G2.03C;SPAC1F5.06
SPCC895.03c	GO Biological Process	GO:0006613	cotranslational protein targeting to membrane	Enriched	1.10497237569061 (12/1086)	0.292112950340798 (15/5135)	0.000204461	SPCC126.15C;SPAC23H4.07C;SPBC3B9.03;SPCC320.10;SPAC19B12.09;SPCC1682.05C;SPBC354.02C;SPAC4G8.02C;SPAC1071.03C;SPCC188.06C;SPAC17H9.07;SPBC2G2.03C
SPBC29B5.04c	GO Biological Process	GO:0051649	establishment of localization in cell	Enriched	15.9300184162063 (173/1086)	11.7234664070107 (602/5135)	0.000296746	SPBC646.17C;SPCC126.15C;SPBP22H7.08;SPAC1805.04;SPCC285.08;SPBC691.02C;SPCC576.07;SPBC17G9.04C;SPCC1739.14;SPBC13G1.03C;SPCC1442.17C;SPAC6G9.12;SPBC119.17;SPCC24B10.05;SPAC1093.06C;SPBC3B9.03;SPAC23H4.07C;SPBC106.20;SPBC31F10.07;SPBC3B9.12;SPBC25H2.04C;SPAC12B10.02C;SPCC285.13C;SPAC824.09C;SPBC1709.10C;SPAC1805.08;SPBC1604.08C;SPBC947.12;SPBC30B4.05;SPCC320.10;SPAC2E1P5.04C;SPAC637.04;SPAC56F8.08…
SPAC17A2.04c	GO Biological Process	GO:0065003	macromolecular complex assembly	Enriched	9.48434622467772 (103/1086)	6.27069133398247 (322/5135)	0.000300914	SPCC126.15C;SPAC1751.03;SPBC19C2.01;SPBC609.05;SPCC1235.05C;SPCC1235.09;SPCC970.12;SPAC26A3.16;SPCC31H12.04C;SPBC1604.25;SPAC12B10.07;SPBC11C11.04C;SPCC285.13C;SPBC21D10.07;SPAC23H3.05C;SPAC4D7.13;SPBC947.12;SPCC306.04C;SPAC16A10.02;SPBC354.03;SPAC1786.03;SPBC1861.04C;SPBC3E7.14;SPBC36B7.08C;SPBP8B7.28C;SPBC12D12.03;SPCC14G10.03C;SPBP23A10.02;SPBC14C8.07C;SPAPJ698.03C;SPBC25H2.12C;SPAC25B8.07C;SP…
SPBC3H7.01	GO Biological Process	GO:0044267	cellular protein metabolic process	Enriched	28.4530386740331 (309/1086)	23.0379746835443 (1183/5135)	0.000307815	SPBC2G5.03;SPBC1709.04C;SPBC16G5.04;SPAC959.08;SPBP22H7.08;SPBC9B6.10;SPBC16C6.07C;SPBC16H5.05C;SPBC32C12.03C;SPBC649.02;SPAC1751.03;SPCC18.14C;SPBC19C2.13C;SPCC1235.09;SPCC1795.11;SPBC13E7.08C;SPAC26A3.16;SPCC126.13C;SPBC18H10.15;SPCC16C4.18C;SPBC13G1.10C;SPAC17H9.10C;SPAC4G9.16C;SPCC31H12.04C;SPBP23A10.08;SPCC24B10.19C;SPAC23D3.07;SPBC119.17;SPCC1223.07C;SPAC13G6.01C;SPCC1682.13;SPBC56F2.02;SPA…
SPCC18.01c	GO Biological Process	GO:0072657	protein localization to membrane	Enriched	2.94659300184162 (32/1086)	1.34371957156767 (69/5135)	0.000362558	SPCC126.15C;SPCC24B10.05;SPBC3B9.03;SPAC23H4.07C;SPCC1672.12C;SPBC25H2.04C;SPBC13G1.07;SPAC2E1P5.04C;SPCC320.10;SPBC27B12.10C;SPBC543.10;SPAC13G6.04;SPAC17H9.17C;SPBC409.21;SPAC17G6.09;SPAC19B12.09;SPCC1682.05C;SPAC1142.06;SPCC1620.05;SPBC354.02C;SPBP4H10.03;SPAC9G1.04;SPAC4G8.02C;SPAC1071.03C;SPAC2F3.02;SPCC188.06C;SPAC222.03C;SPAC17H9.07;SPAC17C9.09C;SPBC2G2.03C;SPAC167.02;SPAC1F5.06
SPAC13G7.09c	GO Biological Process	GO:0046907	intracellular transport	Enriched	14.7329650092081 (160/1086)	10.7692307692308 (553/5135)	0.000427065	SPBC646.17C;SPCC126.15C;SPBP22H7.08;SPAC1805.04;SPCC285.08;SPBC691.02C;SPCC576.07;SPBC17G9.04C;SPCC1739.14;SPBC13G1.03C;SPCC1442.17C;SPAC6G9.12;SPBC119.17;SPCC24B10.05;SPAC1093.06C;SPBC3B9.03;SPAC23H4.07C;SPBC106.20;SPBC31F10.07;SPBC3B9.12;SPBC25H2.04C;SPCC285.13C;SPAC824.09C;SPBC1709.10C;SPAC1805.08;SPBC1604.08C;SPBC30B4.05;SPCC320.10;SPAC2E1P5.04C;SPAC637.04;SPBC1D7.04;SPBC27B12.10C;SPBC4.03C;S…
SPAC4H3.07c	GO Biological Process	GO:0019538	protein metabolic process	Enriched	29.1896869244936 (317/1086)	23.8364167478092 (1224/5135)	0.000441324	SPBC2G5.03;SPBC1709.04C;SPBC16G5.04;SPAC959.08;SPBP22H7.08;SPBC9B6.10;SPBC16C6.07C;SPBC16H5.05C;SPBC32C12.03C;SPBC649.02;SPAC1751.03;SPCC18.14C;SPBC19C2.13C;SPCC5E4.04;SPCC1235.09;SPCC1795.11;SPBC13E7.08C;SPAC26A3.16;SPCC126.13C;SPBC18H10.15;SPCC16C4.18C;SPBC13G1.10C;SPAC17H9.10C;SPAC4G9.16C;SPCC31H12.04C;SPBP23A10.08;SPCC24B10.19C;SPAC23D3.07;SPBC119.17;SPCC1223.07C;SPAC13G6.01C;SPCC1682.13;SPBC…
SPBC651.08c	GO Biological Process	GO:0022402	cell cycle process	Enriched	15.9300184162063 (173/1086)	11.8597857838364 (609/5135)	0.000574393	SPBC646.17C;SPBC16C6.07C;SPBC17D1.07C;SPBC609.05;SPCC5E4.04;SPAC144.07C;SPBC17D11.06;SPCC970.12;SPBC23E6.07C;SPAC26A3.16;SPBC409.09C;SPAC17H9.10C;SPBC36.12C;SPAC1687.18C;SPAC12B10.07;SPAC23D3.07;SPCC188.03;SPAC1093.06C;SPAC10F6.09C;SPBC106.09;SPCC1795.04C;SPAC4D7.07C;SPAC3G6.02;SPAC1805.08;SPAC3C7.12;SPCC576.10C;SPCC1235.07;SPBC947.12;SPAC31A2.15C;SPBC902.03;SPAC1786.03;SPBC725.12;SPAC31A2.16;SPA…
SPBC337.14	GO Biological Process	GO:0033036	macromolecule localization	Enriched	15.9300184162063 (173/1086)	11.8597857838364 (609/5135)	0.000574393	SPCC126.15C;SPAC1805.04;SPBC609.05;SPAC4D7.12C;SPCC285.08;SPCC576.07;SPBC17G9.04C;SPCC1739.14;SPBC13G1.03C;SPCC23B6.04C;SPAC1687.18C;SPAC12B10.07;SPBC119.17;SPAC17G6.02C;SPCC24B10.05;SPAC1093.06C;SPBC3B9.03;SPAC23H4.07C;SPBC106.20;SPBC31F10.07;SPCC1672.12C;SPBC3B9.12;SPBC25H2.04C;SPCC285.13C;SPAC1805.08;SPBC13G1.07;SPAC3C7.12;SPBC1604.08C;SPAC31A2.15C;SPBC30B4.05;SPCC320.10;SPAC2E1P5.04C;SPAC637.…
SPBC16E9.09c	GO Biological Process	GO:0010467	gene expression	Enriched	31.5837937384899 (343/1086)	26.1927945472249 (1345/5135)	0.000660855	SPBC337.03;SPAC4G8.06C;SPBC2G5.03;SPBC1709.04C;SPBC16G5.04;SPAC2F7.04;SPAC959.08;SPBP22H7.08;SPBC16H5.05C;SPCC1223.10C;SPCC1442.10C;SPBC649.02;SPAC1751.03;SPAC1805.04;SPBC19C2.01;SPCC18.14C;SPBC609.05;SPCC1235.05C;SPBC19C2.13C;SPCC1235.09;SPCC1795.11;SPBC1604.09C;SPBC13E7.08C;SPBC17G9.04C;SPBC365.10;SPCC16C4.18C;SPBC13G1.10C;SPAC17H9.10C;SPAC4G9.16C;SPCC31H12.04C;SPCC1739.14;SPBC36.12C;SPBC28F2.1…
SPBTRNAPHE.03	GO Biological Process	GO:0044085	cellular component biogenesis	Enriched	20.1657458563536 (219/1086)	15.6767283349562 (805/5135)	0.000660855	SPCC126.15C;SPBC4C3.06;SPBP22H7.08;SPAC19B12.03;SPBC649.02;SPAC1751.03;SPBC17D1.07C;SPBC19C2.01;SPCC18.14C;SPBC609.05;SPCC1235.05C;SPAC806.02C;SPCC1235.09;SPBC13G1.06C;SPBC1604.09C;SPCC970.12;SPCC553.08C;SPBC31F10.12;SPAC26A3.16;SPBC17G9.04C;SPCC31H12.04C;SPBC36.12C;SPBC1604.25;SPAC12B10.07;SPBC11C11.04C;SPBC1A4.07C;SPAC22F3.08C;SPCC285.13C;SPBC21D10.07;SPAC23H3.05C;SPAC4D7.13;SPAC26A3.07C;SPBC94…
SPAC18B11.10	GO Biological Process	GO:0006461	protein complex assembly	Enriched	5.89318600368324 (64/1086)	3.56377799415774 (183/5135)	0.000961468	SPCC126.15C;SPBC609.05;SPCC970.12;SPAC26A3.16;SPBC1604.25;SPAC12B10.07;SPBC11C11.04C;SPCC285.13C;SPBC21D10.07;SPBC947.12;SPAC16A10.02;SPAC1786.03;SPBC36B7.08C;SPBC12D12.03;SPCC14G10.03C;SPBP23A10.02;SPBC25H2.12C;SPAC25B8.07C;SPAC9.12C;SPAC4A8.15C;SPBC29A10.03C;SPAC890.02C;SPBC1A4.08C;SPBC12D12.01;SPAC3A11.13;SPBC947.14C;SPAC19B12.09;SPBC30D10.21;SPCC1682.05C;SPBC32F12.04;SPBC119.18;SPAC17H9.12C;S…
SPBC1734.09	GO Biological Process	GO:0070271	protein complex biogenesis	Enriched	5.89318600368324 (64/1086)	3.56377799415774 (183/5135)	0.000961468	SPCC126.15C;SPBC609.05;SPCC970.12;SPAC26A3.16;SPBC1604.25;SPAC12B10.07;SPBC11C11.04C;SPCC285.13C;SPBC21D10.07;SPBC947.12;SPAC16A10.02;SPAC1786.03;SPBC36B7.08C;SPBC12D12.03;SPCC14G10.03C;SPBP23A10.02;SPBC25H2.12C;SPAC25B8.07C;SPAC9.12C;SPAC4A8.15C;SPBC29A10.03C;SPAC890.02C;SPBC1A4.08C;SPBC12D12.01;SPAC3A11.13;SPBC947.14C;SPAC19B12.09;SPBC30D10.21;SPCC1682.05C;SPBC32F12.04;SPBC119.18;SPAC17H9.12C;S…
SPAC12B10.12c	GO Biological Process	GO:0071822	protein complex subunit organization	Enriched	8.37937384898711 (91/1086)	5.58909444985394 (287/5135)	0.00153533	SPCC126.15C;SPBC12C2.05C;SPBC609.05;SPCC970.12;SPAC26A3.16;SPBP23A10.08;SPBC1604.25;SPAC12B10.07;SPAC3G9.05;SPBC11C11.04C;SPBC31F10.07;SPCC285.13C;SPBC21D10.07;SPAC4D7.07C;SPBC947.12;SPAC16A10.02;SPAC1786.03;SPBC36B7.08C;SPBC12D12.03;SPCC14G10.03C;SPCC1450.02;SPBP23A10.02;SPBC11G11.02C;SPBC2D10.14C;SPAC4H3.02C;SPBC25H2.12C;SPBC83.08;SPAC25B8.07C;SPAC9.12C;SPAC4A8.15C;SPBC29A10.03C;SPAC890.02C;SPA…
SPBC29A10.10c	GO Biological Process	GO:0009267	cellular response to starvation	Underrepresented	0.184162062615101 (2/1086)	1.34371957156767 (69/5135)	0.00153993	SPBC19C2.02;SPBC12C2.13C
SPAC32A11.04c	GO Biological Process	GO:0042594	response to starvation	Underrepresented	0.184162062615101 (2/1086)	1.34371957156767 (69/5135)	0.00153993	SPBC19C2.02;SPBC12C2.13C
SPBC24C6.05	GO Biological Process	GO:0000226	microtubule cytoskeleton organization	Enriched	3.86740331491713 (42/1086)	2.10321324245375 (108/5135)	0.00164396	SPAC26A3.16;SPAC1093.06C;SPBC11C11.04C;SPAC4D7.07C;SPAC1805.08;SPAC3C7.12;SPBC947.12;SPAC31A2.15C;SPAC1786.03;SPCC736.14;SPAC16A10.04;SPAC11E3.03;SPAC890.02C;SPAC664.10;SPBC12D12.01;SPCC895.07;SPBC32F12.04;SPBC11C11.03;SPAC1F3.06C;SPAPB1A10.09;SPAPB17E12.06;SPAC9G1.15C;SPBC649.05;SPAC16A10.05C;SPBC902.06;SPAC27F1.04C;SPCC417.02;SPAC3H8.07C;SPAC1782.09C;SPBC26H8.07C;SPAC12B10.04;SPBC16A3.15C;SPBC1…
SPCC1795.11	GO Biological Process	GO:0007017	microtubule-based process	Enriched	4.23572744014733 (46/1086)	2.39532619279455 (123/5135)	0.00201521	SPBC646.17C;SPAC26A3.16;SPAC1093.06C;SPBC11C11.04C;SPAC4D7.07C;SPAC1805.08;SPAC3C7.12;SPBC947.12;SPAC31A2.15C;SPAC1786.03;SPCC736.14;SPAC16A10.04;SPAC11E3.03;SPAC890.02C;SPAC664.10;SPBC12D12.01;SPCC895.07;SPBC32F12.04;SPBC11C11.03;SPAC1F3.06C;SPAPB1A10.09;SPAPB17E12.06;SPAC9G1.15C;SPBC649.05;SPAC16A10.05C;SPBC902.06;SPBC14C8.13;SPAC27F1.04C;SPAC22H10.10;SPAC6G9.13C;SPCC417.02;SPAC3H8.07C;SPAC1782…
SPAC22E12.16c	GO Biological Process	GO:0009259	ribonucleotide metabolic process	Underrepresented	0.644567219152855 (7/1086)	2.16163583252191 (111/5135)	0.00201521	SPBC36.12C;SPAC1687.21;SPCC11E10.05C;SPBC25D12.04;SPAC1F12.08;SPBC1198.05;SPAPB17E12.14C
SPAC4G9.10	GO Biological Process	GO:0016482	cytoplasmic transport	Enriched	10.6813996316759 (116/1086)	7.61441090555015 (391/5135)	0.00233905	SPCC126.15C;SPBP22H7.08;SPAC1805.04;SPCC285.08;SPBC17G9.04C;SPCC1739.14;SPBC13G1.03C;SPCC1442.17C;SPAC6G9.12;SPBC119.17;SPCC24B10.05;SPAC23H4.07C;SPBC3B9.03;SPBC25H2.04C;SPBC3B9.12;SPCC285.13C;SPAC824.09C;SPBC1604.08C;SPBC30B4.05;SPCC320.10;SPBC1D7.04;SPBC27B12.10C;SPBC4.03C;SPAC17C9.14;SPCC1840.03;SPBC17A3.10;SPAPB17E12.03;SPCC1442.03;SPBC336.13C;SPAC4F10.18;SPAC17H9.16;SPCC18B5.07C;SPCC18B5.10C…
SPAC328.05	GO Biological Process	GO:0033044	regulation of chromosome organization	Enriched	4.69613259668508 (51/1086)	2.76533592989289 (142/5135)	0.00260546	SPBC16C6.07C;SPCC5E4.04;SPAC17H9.10C;SPAC1687.18C;SPAC23D3.07;SPAC1093.06C;SPAC10F6.09C;SPBC106.09;SPCC1795.04C;SPAC3G6.02;SPAC1805.08;SPCC576.10C;SPBC365.06;SPBC36B7.08C;SPAC637.10C;SPAC1687.05;SPAC3G9.08;SPBC4.07C;SPAC17C9.01C;SPAC7D4.14C;SPBC16G5.01;SPAC23G3.11;SPCC622.16C;SPAC140.03;SPAC4A8.12C;SPAPB8E5.02C;SPCC1682.16;SPCC1919.15;SPCC1795.01C;SPAC1F7.01C;SPAC19G12.01C;SPBC428.17C;SPAC607.05;…
SPAC12B10.07	GO Biological Process	GO:2001252	positive regulation of chromosome organization	Enriched	2.76243093922652 (30/1086)	1.36319376825706 (70/5135)	0.00274277	SPBC16C6.07C;SPCC5E4.04;SPAC1687.18C;SPAC23D3.07;SPAC10F6.09C;SPBC106.09;SPCC1795.04C;SPAC3G6.02;SPCC576.10C;SPBC36B7.08C;SPAC637.10C;SPBC4.07C;SPAC17C9.01C;SPBC16G5.01;SPAC23G3.11;SPAC4A8.12C;SPAPB8E5.02C;SPCC1682.16;SPAC1F7.01C;SPAC19G12.01C;SPAC607.05;SPAC13C5.01C;SPAC637.12C;SPBC106.16;SPCC16A11.16C;SPAC1782.09C;SPBC1A4.01;SPBC23G7.12C;SPAC1420.03;SPCC613.12C
SPAC227.12	GO Biological Process	GO:0019693	ribose phosphate metabolic process	Underrepresented	0.828729281767956 (9/1086)	2.39532619279455 (123/5135)	0.00288103	SPBC36.12C;SPAC1687.21;SPCC11E10.05C;SPBC25D12.04;SPCC1620.06C;SPAC1F12.08;SPAC4A8.14;SPBC1198.05;SPAPB17E12.14C
SPBP8B7.01c	GO Biological Process	GO:1902582	single-organism intracellular transport	Enriched	12.707182320442 (138/1086)	9.4255111976631 (484/5135)	0.00329783	SPBC646.17C;SPCC126.15C;SPBP22H7.08;SPAC1805.04;SPCC285.08;SPBC691.02C;SPCC576.07;SPBC17G9.04C;SPBC13G1.03C;SPCC1442.17C;SPAC6G9.12;SPBC119.17;SPCC24B10.05;SPAC1093.06C;SPBC3B9.03;SPAC23H4.07C;SPBC3B9.12;SPBC25H2.04C;SPCC285.13C;SPAC824.09C;SPBC1709.10C;SPAC1805.08;SPBC1604.08C;SPBC30B4.05;SPCC320.10;SPAC2E1P5.04C;SPBC1D7.04;SPBC27B12.10C;SPBC4.03C;SPAC17C9.14;SPCC1840.03;SPBC17A3.10;SPBC543.10;S…
SPAC21E11.06	GO Biological Process	GO:0009161	ribonucleoside monophosphate metabolic process	Underrepresented	0.552486187845304 (6/1086)	1.86952288218111 (96/5135)	0.00464431	SPAC1687.21;SPCC11E10.05C;SPCC1620.06C;SPAC4A8.14;SPBC1198.05;SPAPB17E12.14C
SPBTRNALEU.09	GO Biological Process	GO:0002181	cytoplasmic translation	Enriched	7.18232044198895 (78/1086)	4.79065238558909 (246/5135)	0.00473826	SPBC2G5.03;SPAC959.08;SPBP22H7.08;SPBC649.02;SPAC1751.03;SPCC18.14C;SPCC1795.11;SPCC31H12.04C;SPAC4G9.16C;SPBC13G1.10C;SPCC1223.07C;SPBC56F2.02;SPAC26A3.07C;SPBC16C6.11;SPAC29A4.15;SPBC18E5.04;SPBC16D10.11C;SPAC16E8.14C;SPAC1006.07;SPAC13G6.07C;SPAC23C11.02C;SPAC3H5.10;SPBC3B9.13C;SPBC17G9.03C;SPCC576.11;SPAC25G10.06;SPCC24B10.09;SPBC839.13C;SPAPB1E7.12;SPAC11G7.04;SPAC17G6.06;SPAPB8E5.06C;SPAC3H…
SPBC1306.02	GO Biological Process	GO:0070727	cellular macromolecule localization	Enriched	13.9963167587477 (152/1086)	10.6134371957157 (545/5135)	0.00473826	SPCC126.15C;SPBC609.05;SPAC4D7.12C;SPCC285.08;SPCC576.07;SPBC13G1.03C;SPAC1687.18C;SPAC12B10.07;SPBC119.17;SPCC24B10.05;SPAC1093.06C;SPBC3B9.03;SPAC23H4.07C;SPBC106.20;SPBC31F10.07;SPCC1672.12C;SPBC3B9.12;SPBC25H2.04C;SPCC285.13C;SPAC1805.08;SPBC13G1.07;SPAC3C7.12;SPBC1604.08C;SPAC31A2.15C;SPBC30B4.05;SPCC320.10;SPAC2E1P5.04C;SPAC637.04;SPBC27B12.10C;SPBC4.03C;SPAC17C9.14;SPBC25D12.02C;SPCC1840.0…
SPAC1B3.02c	GO Biological Process	GO:0009126	purine nucleoside monophosphate metabolic process	Underrepresented	0.368324125230203 (4/1086)	1.55793573515093 (80/5135)	0.00485829	SPAC1687.21;SPCC11E10.05C;SPBC1198.05;SPAPB17E12.14C
SPAC1B3.05	GO Biological Process	GO:0009167	purine ribonucleoside monophosphate metabolic process	Underrepresented	0.368324125230203 (4/1086)	1.55793573515093 (80/5135)	0.00485829	SPAC1687.21;SPCC11E10.05C;SPBC1198.05;SPAPB17E12.14C
SPAC144.07c	GO Biological Process	GO:0009605	response to external stimulus	Underrepresented	0.368324125230203 (4/1086)	1.57740993184031 (81/5135)	0.00485829	SPBC36.12C;SPBC19C2.02;SPAC18B11.10;SPBC12C2.13C
SPBC1709.13c	GO Biological Process	GO:0009991	response to extracellular stimulus	Underrepresented	0.368324125230203 (4/1086)	1.57740993184031 (81/5135)	0.00485829	SPBC36.12C;SPBC19C2.02;SPAC18B11.10;SPBC12C2.13C
SPAC12B10.04	GO Biological Process	GO:0031667	response to nutrient levels	Underrepresented	0.368324125230203 (4/1086)	1.57740993184031 (81/5135)	0.00485829	SPBC36.12C;SPBC19C2.02;SPAC18B11.10;SPBC12C2.13C
SPBC30D10.11	GO Biological Process	GO:0031668	cellular response to extracellular stimulus	Underrepresented	0.368324125230203 (4/1086)	1.57740993184031 (81/5135)	0.00485829	SPBC36.12C;SPBC19C2.02;SPAC18B11.10;SPBC12C2.13C
SPBC4F6.15c	GO Biological Process	GO:0031669	cellular response to nutrient levels	Underrepresented	0.368324125230203 (4/1086)	1.57740993184031 (81/5135)	0.00485829	SPBC36.12C;SPBC19C2.02;SPAC18B11.10;SPBC12C2.13C
SPAC1486.04c	GO Biological Process	GO:0071496	cellular response to external stimulus	Underrepresented	0.368324125230203 (4/1086)	1.57740993184031 (81/5135)	0.00485829	SPBC36.12C;SPBC19C2.02;SPAC18B11.10;SPBC12C2.13C
SPAC1D4.08	GO Biological Process	GO:0034613	cellular protein localization	Enriched	13.9042357274401 (151/1086)	10.5550146056475 (542/5135)	0.00530073	SPCC126.15C;SPBC609.05;SPAC4D7.12C;SPCC285.08;SPCC576.07;SPBC13G1.03C;SPAC1687.18C;SPAC12B10.07;SPBC119.17;SPCC24B10.05;SPAC1093.06C;SPBC3B9.03;SPAC23H4.07C;SPBC106.20;SPBC31F10.07;SPCC1672.12C;SPBC3B9.12;SPBC25H2.04C;SPCC285.13C;SPAC1805.08;SPBC13G1.07;SPAC3C7.12;SPBC1604.08C;SPAC31A2.15C;SPBC30B4.05;SPCC320.10;SPAC2E1P5.04C;SPAC637.04;SPBC27B12.10C;SPBC4.03C;SPAC17C9.14;SPBC25D12.02C;SPCC1840.0…
SPAC2F7.04	GO Biological Process	GO:0055114	oxidation-reduction process	Underrepresented	0.276243093922652 (3/1086)	1.38266796494645 (71/5135)	0.00550773	SPAC6G10.08;SPAC27D7.06;SPBC1539.07C
SPAC6F6.17	GO Biological Process	GO:1902850	microtubule cytoskeleton organization involved in mitosis	Enriched	1.93370165745856 (21/1086)	0.856864654333009 (44/5135)	0.00553068	SPAC1093.06C;SPAC1805.08;SPAC1786.03;SPCC736.14;SPAC11E3.03;SPAC890.02C;SPBC12D12.01;SPCC895.07;SPBC32F12.04;SPBC11C11.03;SPAPB1A10.09;SPAPB17E12.06;SPAC9G1.15C;SPBC649.05;SPAC16A10.05C;SPAC27F1.04C;SPAC1782.09C;SPBC557.03C;SPBC6B1.04;SPAC1783.03;SPCC1322.12C
SPAC1952.16	GO Biological Process	GO:0009150	purine ribonucleotide metabolic process	Underrepresented	0.552486187845304 (6/1086)	1.85004868549172 (95/5135)	0.00584335	SPBC36.12C;SPAC1687.21;SPCC11E10.05C;SPAC1F12.08;SPBC1198.05;SPAPB17E12.14C
SPCC736.06	GO Biological Process	GO:0044249	cellular biosynthetic process	Enriched	34.7145488029466 (377/1086)	29.8928919182084 (1535/5135)	0.00626769	SPBC337.03;SPBC2G5.03;SPBC16G5.04;SPAC2F7.04;SPAC959.08;SPBP22H7.08;SPAC19B12.03;SPCC1223.10C;SPCC1442.10C;SPBC649.02;SPAC1751.03;SPCC18.14C;SPBC609.05;SPAC1805.06C;SPCC1235.05C;SPAPYUG7.05;SPCC1235.09;SPBC17D11.06;SPBC418.01C;SPCC1795.11;SPBC13E7.08C;SPAC1805.16C;SPBC23E6.07C;SPBC365.10;SPCC16C4.18C;SPBC13G1.10C;SPAC17H9.10C;SPAC4G9.16C;SPCC31H12.04C;SPBC36.12C;SPAC1851.02;SPCC23B6.04C;SPCC24B10…
SPAC1805.12c	GO Biological Process	GO:0033045	regulation of sister chromatid segregation	Enriched	3.03867403314917 (33/1086)	1.63583252190847 (84/5135)	0.0064915	SPBC16C6.07C;SPCC5E4.04;SPAC1687.18C;SPAC23D3.07;SPAC1093.06C;SPAC10F6.09C;SPBC106.09;SPCC1795.04C;SPAC3G6.02;SPAC1805.08;SPCC576.10C;SPAC637.10C;SPBC4.07C;SPAC17C9.01C;SPBC16G5.01;SPAC23G3.11;SPAC4A8.12C;SPAPB8E5.02C;SPCC1682.16;SPCC1795.01C;SPAC19G12.01C;SPBC428.17C;SPAC607.05;SPAC13C5.01C;SPBC106.16;SPCC16A11.16C;SPAC1782.09C;SPBC1A4.01;SPBC23G7.12C;SPBC3D6.04C;SPCC1322.12C;SPBC16A3.05C;SPAC14…
SPBC725.08	GO Biological Process	GO:0033047	regulation of mitotic sister chromatid segregation	Enriched	3.03867403314917 (33/1086)	1.63583252190847 (84/5135)	0.0064915	SPBC16C6.07C;SPCC5E4.04;SPAC1687.18C;SPAC23D3.07;SPAC1093.06C;SPAC10F6.09C;SPBC106.09;SPCC1795.04C;SPAC3G6.02;SPAC1805.08;SPCC576.10C;SPAC637.10C;SPBC4.07C;SPAC17C9.01C;SPBC16G5.01;SPAC23G3.11;SPAC4A8.12C;SPAPB8E5.02C;SPCC1682.16;SPCC1795.01C;SPAC19G12.01C;SPBC428.17C;SPAC607.05;SPAC13C5.01C;SPBC106.16;SPCC16A11.16C;SPAC1782.09C;SPBC1A4.01;SPBC23G7.12C;SPBC3D6.04C;SPCC1322.12C;SPBC16A3.05C;SPAC14…
SPAC12B10.02c	GO Biological Process	GO:1901576	organic substance biosynthetic process	Enriched	34.9907918968692 (380/1086)	30.2044790652386 (1551/5135)	0.0064915	SPBC337.03;SPAC4G8.06C;SPBC2G5.03;SPBC16G5.04;SPAC2F7.04;SPAC959.08;SPBP22H7.08;SPAC19B12.03;SPCC1223.10C;SPCC1442.10C;SPBC649.02;SPAC1751.03;SPCC18.14C;SPBC609.05;SPAC1805.06C;SPCC1235.05C;SPAPYUG7.05;SPCC1235.09;SPBC17D11.06;SPBC418.01C;SPCC1795.11;SPBC13E7.08C;SPAC1805.16C;SPBC23E6.07C;SPBC365.10;SPCC16C4.18C;SPBC13G1.10C;SPAC17H9.10C;SPAC4G9.16C;SPCC31H12.04C;SPBC36.12C;SPAC1851.02;SPCC23B6.0…
SPAC23H4.11c	GO Biological Process	GO:0009058	biosynthetic process	Enriched	35.451197053407 (385/1086)	30.6329113924051 (1573/5135)	0.00662149	SPBC337.03;SPAC4G8.06C;SPBC2G5.03;SPBC16G5.04;SPAC2F7.04;SPAC959.08;SPBP22H7.08;SPAC19B12.03;SPCC1223.10C;SPCC1442.10C;SPBC649.02;SPAC1751.03;SPCC18.14C;SPBC609.05;SPAC1805.06C;SPCC1235.05C;SPAC806.02C;SPAPYUG7.05;SPCC1235.09;SPBC17D11.06;SPBC418.01C;SPCC1795.11;SPBC13G1.06C;SPBC13E7.08C;SPAC1805.16C;SPBC23E6.07C;SPBC365.10;SPCC16C4.18C;SPBC13G1.10C;SPAC17H9.10C;SPAC4G9.16C;SPCC31H12.04C;SPBC36.1…
SPATRNALYS.03	GO Biological Process	GO:0006261	DNA-dependent DNA replication	Enriched	3.77532228360958 (41/1086)	2.16163583252191 (111/5135)	0.00662263	SPBC17D11.06;SPBC23E6.07C;SPAC17H9.10C;SPCC24B10.22;SPAC22F8.07C;SPAC11E3.08C;SPAC1B2.05;SPCC16C4.22;SPCC550.13;SPBP4H10.21C;SPBC14C8.07C;SPBC16G5.12C;SPBC29A10.03C;SPAC644.14C;SPAC27E2.10C;SPBC16D10.09;SPBC1685.11;SPAC25H1.06;SPAC3H8.05C;SPAC1D4.09C;SPBC2D10.16;SPAC2G11.12;SPAC17D4.02;SPAC3H1.01C;SPAC637.12C;SPBC776.12C;SPCC338.16;SPBP8B7.14C;SPBC2A9.12;SPAC6B12.10C;SPAP27G11.15;SPCC16A11.17;SPA…
SPAC23A1.09	GO Biological Process	GO:1902580	single-organism cellular localization	Enriched	7.55064456721915 (82/1086)	5.19961051606621 (267/5135)	0.00757696	SPBC646.17C;SPCC126.15C;SPBP22H7.08;SPBC13G1.03C;SPAC1687.18C;SPBC119.17;SPCC24B10.05;SPAC1093.06C;SPAC23H4.07C;SPBC3B9.03;SPCC1672.12C;SPBC25H2.04C;SPCC285.13C;SPAC1805.08;SPBC13G1.07;SPBC1604.08C;SPBC947.12;SPCC320.10;SPAC2E1P5.04C;SPBC27B12.10C;SPAC17C9.14;SPCC1840.03;SPBC17A3.10;SPBC543.10;SPAPB17E12.03;SPBC336.13C;SPAC17H9.16;SPAC13G6.04;SPAC17H9.17C;SPBC409.21;SPAC664.11;SPAC890.02C;SPAC664…
SPCC1620.06c	GO Biological Process	GO:0009123	nucleoside monophosphate metabolic process	Underrepresented	0.644567219152855 (7/1086)	1.94741966893866 (100/5135)	0.0081224	SPAC1687.21;SPCC11E10.05C;SPCC1620.06C;SPBC2G2.13C;SPAC4A8.14;SPBC1198.05;SPAPB17E12.14C
SPBC336.02	GO Biological Process	GO:0006163	purine nucleotide metabolic process	Underrepresented	0.644567219152855 (7/1086)	1.96689386562804 (101/5135)	0.00830437	SPBC36.12C;SPAC1687.21;SPCC11E10.05C;SPAC1F12.08;SPBC1198.05;SPAC26A3.02;SPAPB17E12.14C
SPBC29A10.07	GO Biological Process	GO:0007154	cell communication	Underrepresented	5.52486187845304 (60/1086)	8.23758519961052 (423/5135)	0.00865942	SPBC9B6.10;SPBC32C12.03C;SPBC17D1.07C;SPBC12C2.05C;SPBC17G9.08C;SPBC18H10.15;SPCC777.08C;SPBC36.12C;SPAC3G9.05;SPAC824.09C;SPCC4B3.16;SPAC31A2.16;SPBC25D12.02C;SPBC887.10;SPCC1739.11C;SPCC550.13;SPAC16A10.04;SPAC12G12.01C;SPBC336.03;SPBC19C2.02;SPBC577.06C;SPAC30.01C;SPAC4A8.12C;SPAC2C4.05;SPBC1773.11C;SPAC18B11.10;SPAC22H10.11C;SPBC337.04;SPCC1795.01C;SPAC1851.03;SPBC2G5.01;SPAC227.07C;SPBC26H8.…
[truncated: 1,037 more rows]

## Sheet: cluster 7
S3_8 Table. Cluster 7, functional enrichments.
Data were grouped into clusters as described. Gene group enrichments were determined for each cluster using AnGeLi.
cluster_7	Category_Name	External_ID	GeneSet_Name	over_represented/under_represented	List_Frequency	Background_Frequency	Corrected_pvalue	Genes_In_Common/Interacting_Gene_Pair
[truncated: 434 more rows]

## Sheet: cluster 8
S3_9 Table. Cluster 8, functional enrichments.
[truncated: 40 more rows]

[truncated: 3 more sheets: cluster 9, cluster 10, cluster 11]
