# Supplementary material for: Functional and Regulatory Profiling of Energy Metabolism in Fission Yeast
Source: Preprints.org preprint supplement (doi:10.20944/preprints201610.0054.v1), 2016-10-14
Supplement: Supplementary file 1 [file supplementary › Additional file 6.xlsx]

## Sheet: Sheet1
S4 Table. List of genes differentially expressed on YES + antimycin A relative to YES
Fold change threshold: ≥1.5
Name	rep1 norm. signal	rep2 norm. signal	rep3 norm. signal	Fold Change Ant vs WT	Regulation	description	name1
SPBC13E7.04	-1.05881	-1.08255	-1.02008	-2.07601	down	F1-ATPase delta subunit (predicted)	atp16
SPBC32C12.02	-0.687813	-0.594939	-0.828504	-1.62874	down	transcription factor Ste11	ste11
SPAP8A3.04c	0.874439	1.36249	0.962918	2.09451	up	heat shock protein Hsp9	hsp9
SPAC1B2.04	-0.912288	-1.03814	-0.949766	-1.95441	down	cytochrome c oxidase subunit VI (predicted)	cox6
SPCC569.05c	1.05822	1.21919	0.866943	2.06783	up	spermidine family transmembrane transporter (predicted)	SPCC569.05c
SPAC1F7.08	1.33448	1.23755	0.473583	2.02119	up	iron transport multicopper oxidase Fio1	fio1
SPCC1682.01	-0.955583	-1.10254	-0.854503	-1.96003	down	ubiquinol-cytochrome-c reductase complex subunit 9 (predicted)	qcr9
SPCC965.07c	1.03863	1.03378	1.26588	2.1626	up	glutathione S-transferase Gst2	gst2
SPAC4G9.20c	-0.556709	-0.749762	-0.669483	-1.57861	down	mitochondrial carrier with solute carrier repeats, organic acid transmembrane transporter (predicted)	SPAC4G9.20c
SPBPB2B2.05	0.838029	1.10839	0.978041	1.9654	up	peptidase family C26 protein	SPBPB2B2.05
SPBC776.15c	-0.559741	-0.568132	-0.662547	-1.51237	down	dihydrolipoamide S-succinyltransferase, e2 component of oxoglutarate dehydrogenase complex Kdg2 (predicted)	kgd2
SPAC22F3.07c	-0.753409	-0.904469	-0.824242	-1.77445	down	F0-ATPase subunit G (predicted)	atp20
SPBP23A10.15c	-1.44149	-1.50444	-1.52319	-2.80832	down	mitochondrial processing peptidase (MPP) complex beta subunit Qcr1 and respiratory chain complex III subunit (predicted)	qcr1
SPCC1442.03	-0.902375		-0.948853	-1.89949	down	mitochondrial ATP-Mg/Pi carrier (predicted)	SPCC1442.03
SPAC1F7.07c	1.53947	1.34826	0.539291	2.20739	up	iron permease Fip1	fip1
SPAC1610.04	-0.571844	-0.53444	-0.659369	-1.50374	down	conserved fungal protein Mug99	mug99
SPBC29A10.13	-1.0929	-1.14761	-1.16068	-2.19426	down	F0-ATPase subunit D (predicted)	atp7
SPCC18B5.01c	1.67096	1.33234	1.7656	3.00973	up	brefeldin A transmembrane transporter Bfr1	bfr1
SPBC428.11	0.632335	0.901711	0.510756	1.60392	up	homocysteine synthase Met17	met17
SPAC869.05c	0.510896	0.927551	0.604429	1.6032	up	sulfate transmembrane transporter (predicted)	SPAC869.05c
SPBC11C11.06c	-1.54397	-1.12082	-1.51442	-2.62637	down	Schizosaccharomyces specific protein	SPBC11C11.06c
SPBC1604.11	-0.870108	-1.06949	-0.841264	-1.90126	down	F0-ATPase subunit F (predicted)	atp17
SPBC9B6.04c	-0.728746	-0.830673	-0.713261	-1.69063	down	mitochondrial translation elongation factor EF-Tu Tuf1	tuf1
SPAC25H1.10c	-0.647934		-0.573705	-1.52713	down	F0-ATPase subunit K (predicted)	atp19
SPCC191.07	-1.02062	-1.08465	-1.02637	-2.06176	down	cytochrome c	cyc1
SPAPB24D3.10c	0.698457	0.475947	0.615461	1.51217	up	alpha-glucosidase Agl1	agl1
SPBC1604.07	-1.12913	-1.21185	-1.23082	-2.28248	down	F0-ATPase subunit (predicted)	atp4
SPBP26C9.03c	-0.771469	-0.901568	-0.479254	-1.64425	down	iron/zinc ion transmembrane transporter (predicted)	fet4
SPBC1683.09c	0.673297	1.46106	0.329858	1.76713	up	ferric-chelate reductase Frp1	frp1
SPAC1782.07	-0.694526	-1.32993	-1.08239	-2.04999	down	ubiquinol-cytochrome-c reductase complex subunit 7	qcr8
SPCC18.18c	-0.976048	-0.791957	-0.986668	-1.88979	down	fumarate hydratase (predicted)	fum1
SPBC29A3.18	-1.28362	-1.23894	-1.24346	-2.38723	down	cytochrome c1 Cyt1 (predicted)	cyt1
SPAC9E9.11	1.04459	0.542724	0.877795	1.76749	up	pyridoxal reductase Plr1	plr1
SPCC4B3.06c	0.908537	0.826184	0.878951	1.82921	up	NADPH-dependent FMN reductase (predicted)	SPCC4B3.06c
SPCC338.10c	-1.03667	-1.09118	-1.02642	-2.07257	down	cytochrome c oxidase subunit V (predicted)	cox5
SPBC36.10	-0.715444	-0.689476	-0.586918	-1.58441	down	mitochondrial intermembrane space protein; involved in phospholipid metabolism (predicted)	SPBC36.10
SPAC222.12c	-1.27231	-1.24083	-1.36039	-2.44727	down	F1-ATPase beta subunit Atp2	atp2
SPCC1235.14	0.879372	0.592014	1.11451	1.81751	up	hexose transmembrane transporter Ght5	ght5
SPAC1F8.01	0.897385	0.862753	0.708379	1.76888	up	hexose transmembrane transporter Ght3	ght3
SPAC1786.02	-0.784714	-0.562448	-0.644759	-1.58444	down	phospholipase (predicted)	SPAC1786.02
SPCC1739.09c	-1.12589	-1.19461	-1.18103	-2.24572	down	cytochrome c oxidase subunit VIa (predicted)	cox13
SPCC1442.05c	-1.13191	-1.18071	-1.24017	-2.27247	down	mitochondrial protein	SPCC1442.05c
SPBC947.04	0.713208	0.514502	1.26946	1.78063	up	cell surface glycoprotein (predicted), DIPSY family	pfl3
SPBC18H10.14	0.836051			1.78516	up	40S ribosomal protein S16 (predicted)	rps1601
SPAC27D7.09c	1.90576	1.46479	1.72883	3.24855	up	But2 family protein	SPAC27D7.09c
SPAC14C4.14	-1.05113	-0.863434	-1.18194	-2.04509	down	F1-ATPase alpha subunit	atp1
SPAC1296.02	-0.90503	-1.08349	-0.932224	-1.96371	down	cytochrome c oxidase subunit IV (predicted)	cox4
SPCC4B3.10c	1.14231	0.763196	0.823722	1.87871	up	inositol 1,3,4,5,6-pentakisphosphate (IP5) kinase	ipk1
SPBC16H5.06	-1.42283	-1.65191	-1.52262	-2.89277	down	ubiquinol-cytochrome-c reductase complex subunit 5	rip1
SPCC613.10	-0.999024	-0.884164	-1.09788	-1.99127	down	ubiquinol-cytochrome-c reductase complex core protein Qcr2 (predicted)	qcr2
SPBC29A3.10c	-0.99857	-1.17236	-0.911824	-2.03861	down	F1-ATPase subunit H (predicted)	atp14
SPAC23C4.11	-0.568271	-0.70593	-0.527143	-1.51619	down	F0-ATPase subunit J (predicted)	atp18
SPBP4H10.08	-0.75101	-1.04625	-0.751756	-1.80209	down	Reiske ISP-associated protein, ubiquinol-cytochrome-c reductase complex subunit Qcr10 (predicted)	qcr10
SPBC1773.12	-1.06762		-0.93907	-2.00465	down	transcription factor, zf-fungal binuclear cluster type (predicted)	SPBC1773.12
SPBC1306.01c	-0.98063	-1.0603	-1.13837	-2.08459	down	mitochondrial translation elongation factor G (predicted)	SPBC1306.01c
SPBC1105.03c	-0.788848	-0.765043	-0.770428	-1.71092	down	mitochondrial ribosomal protein subunit L16 (predicted)	mrpl16
SPBC25H2.09	-1.08761	-1.05702	-1.13311	-2.13255	down	DUF1690 family protein	SPBC25H2.09
SPBC16C6.08c	-0.951879	-0.951909	-1.0221	-1.96604	down	ubiquinol-cytochrome-c reductase complex subunit 8, hinge protein (predicted)	qcr6
SPAC1039.02	0.655373	1.00142	0.320279	1.57901	up	phosphoprotein phosphatase (predicted)	SPAC1039.02
SPCPB1C11.01	-0.834963	-0.310203	-0.681709	-1.52516	down	ammonium transmembrane transporter Amt1	amt1
SPAC27D7.03c	-1.35335	-1.40527	-1.52921	-2.69311	down	RNA-binding protein involved in meiosis Mei2	mei2
SPAC27D7.11c	1.71803	1.22724	1.51243	2.80092	up	But2 family protein	SPAC27D7.11c
SPAC3A11.07	-1.66449	-1.74951	-1.93387	-3.44052	down	mitochondrial NADH dehydrogenase (ubiquinone) Nde2 (predicted)	nde2
SPCC663.03	0.747242	0.554092	0.668551	1.57639	up	leptomycin transmembrane transporter Pmd1	pmd1
SPCC1442.08c	-0.754555			-1.68711	down	cytochrome c oxidase subunit VIb (predicted)	cox12
SPATRNAARG.01	-0.606683			-1.52275	down		SPATRNAARG.01
SPBC106.02c	0.638565	0.991095	0.530994	1.64743	up	sulfiredoxin	srx1
SPBC23G7.10c	1.06689	1.09957	1.03045	2.09309	up	NADH-dependent flavin oxidoreductase (predicted)	SPBC23G7.10c
SPAPJ691.03	-0.843896	-0.772182	-0.748782	-1.72702	down	mitochondrial inner membrane organizing system protein (predicted)	SPAPJ691.03
SPBC4F6.09	0.90057	1.02097	0.578565	1.78184	up	siderophore-iron transmembrane transporter Str1	str1
SPBC359.05	0.701439	0.800545	0.318336	1.52285	up	ABC transmembrane transporter Abc3, unknown specificity	abc3
SPBC12D12.05c	-0.507577	-0.71491	-0.609109	-1.52682	down	mitochondrial carrier, calcium binding subfamily (predicted)	SPBC12D12.05c
SPBC12C2.04	0.799807	0.795801	0.636029	1.67467	up	NAD binding dehydrogenase family protein	SPBC12C2.04
SPCC70.02c	-1.52809	-1.50108	-1.51522	-2.85758	down	mitochondrial ATPase inhibitor (predicted)	SPCC70.02c
SPBC1703.13c	-1.37583	-1.58231	-1.38476	-2.7276	down	mitochondrial inorganic phosphate transmembrane transporter (predicted)	SPBC1703.13c
SPBC1734.13	-0.964703	-0.975939	-1.09093	-2.01464	down	F1-ATPase gamma subunit (predicted)	atp3
SPBC530.10c	-0.768415	-0.588813	-0.785849	-1.64075	down	mitochondrial adenine nucleotide carrier Anc1	anc1
SPBC530.02	0.634937			1.55287	up	transmembrane transporter (predicted)	SPBC530.02
SPCC1259.05c	-0.712385	-0.910277	-0.784547	-1.744	down	cytochrome c oxidase subunit VIIa (predicted)	cox9
SPAPB24D3.08c	0.642496	0.759639	0.843351	1.68004	up	NADP-dependent oxidoreductase (predicted)	SPAPB24D3.08c
SPCC737.02c	-1.3255	-1.54534	-1.2804	-2.60945	down	ubiquinol-cytochrome-c reductase complex subunit 6 (predicted)	qcr7
SPBC3E7.05c	-0.669551	-0.443316	-0.670897	-1.51004	down	human mitofilin ortholog (predicted)	SPBC3E7.05c
SPAC3C7.14c	1.21985	1.08048	1.10746	2.1976	up	ubiquitinated histone-like protein Uhp1	obr1
SPBC947.15c	-0.956826	-0.92314	-1.03385	-1.96057	down	mitochondrial NADH dehydrogenase (ubiquinone) Nde1 (predicted)	nde1
SPSNORNA.17	-1.29655	-0.353433	-0.54698	-1.66131	down		snoR58
SPCC663.08c	1.02762	0.915851	1.11026	2.02498	up	short chain dehydrogenase	SPCC663.08c
SPAC1F8.03c	1.75292	2.42171	1.22264	3.48	up	siderophore-iron transporter Str3	str3
SPCC1840.06	-1.07685	-1.13678	-1.06344	-2.13222	down	F0-ATPase delta subunit (predicted)	atp5
SPSNORNA.04	0.605461			1.52147	up		snoZ5
SPBC83.13	-0.59876	-0.698396	-0.645243	-1.56641	down	mitochondrial tricarboxylic acid transmembrane transporter (predicted)	SPBC83.13
SPAC1486.01	-0.92943	-1.01435	-0.845417	-1.90492	down	manganese superoxide dismutase	SPAC1486.01
SPBC29A3.11c	-0.867089	-0.658979	-0.926502	-1.76238	down	mitochondrial ornithine transmembrane transporter Ort1 (predicted)	ort1
SPBC409.08	-0.842546	-0.698249	-0.736831	-1.69256	down	spermine family transmembrane transporter (predicted)	SPBC409.08
SPAC15A10.17	-1.00106	-1.1408	-0.890344	-2.01494	down	cytochrome C oxidase assembly factor Coa2 (predicted)	coa2
SPBC106.08c	-0.912035		-0.839727	-1.83513	down	mug2/mug135/meu2 family	mug2
SPBC27B12.03c	-0.819553	-0.917625	-1.00112	-1.88265	down	C-5 sterol desaturase Erg32	erg32
