# Supplementary material for: Functional and Regulatory Profiling of Energy Metabolism in Fission Yeast
Source: Preprints.org preprint supplement (doi:10.20944/preprints201610.0054.v1), 2016-10-14
Supplement: Supplementary file 1 [file supplementary › Additional file 7.xlsx]

## Sheet: Sheet1
S5 Table. Yeast strains used in this study
Wild-type strains :
	h- 972
	h+s
Strains for diploid preparation
	ade6-216 h-
	ade6-210 h+
Strains constructed for this study
	h- cox4-GFP-kanMX6
	h- mce1::hphX6
	h+ acl1::hphX6
	h-acl2::kanX6
	h-acl1::hphX6 acl2::kanX6
	h+/h- ade- 216/ ade-210, acs1::hph
